# Supplementary material for: Quantitative proteomics suggests changes in the carbohydrate metabolism of maize in response to larvae of the belowground herbivore Holotrichia parallela
Source: PeerJ. 2020 Aug 27;8:e9819. doi: 10.7717/peerj.9819 (PMC7456535; doi:10.7717/peerj.9819)
Supplement: Supplemental Information 1 [file peerj-08-9819-s001.xlsx]

## Sheet: Table S1
Table S1 Detailed information on the identified protein.
Accession	Protein Name	Gene Name	Description	MW [kDa]	calc. pI	Fold Change	t test p value
C4J4M8	Histone H2B		Histone H2B OS=Zea mays OX=4577 PE=2 SV=1 - [C4J4M8_MAIZE]	16.0829	10.0229	2.63979	0.00280102
B4FML8	40S ribosomal protein S13	100272255	40S ribosomal protein S13 OS=Zea mays OX=4577 GN=100272255 PE=2 SV=1 - [B4FML8_MAIZE]	17.1326	10.5356	2.61	0.00426147
B6TT83	SRC2		SRC2 OS=Zea mays OX=4577 PE=2 SV=1 - [B6TT83_MAIZE]	33.4263	5.21143	2.39149	0.0111287
B8QUV3	Chitinase	chiA	Chitinase OS=Zea mays subsp. parviglumis OX=76912 GN=chiA PE=4 SV=1 - [B8QUV3_ZEAMP]	29.2017	8.17725	2.36183	0.0222614
B6TTG6	60S ribosomal protein L30		60S ribosomal protein L30 OS=Zea mays OX=4577 PE=2 SV=1 - [B6TTG6_MAIZE]	12.5306	9.65674	2.34814	0.00463604
C0PNI6	Uncharacterized protein		Uncharacterized protein OS=Zea mays OX=4577 PE=2 SV=1 - [C0PNI6_MAIZE]	12.5085	8.63135	2.23221	0.00509822
B4FIE9	S-adenosylmethionine synthase	100194360	S-adenosylmethionine synthase OS=Zea mays OX=4577 GN=100194360 PE=2 SV=2 - [B4FIE9_MAIZE]	42.7455	5.93506	2.20357	0.000217919
B4FYQ7	Early nodulin-like protein 16	100274039	Early nodulin-like protein 16 OS=Zea mays OX=4577 GN=100274039 PE=2 SV=1 - [B4FYQ7_MAIZE]	20.6061	7.84033	2.18623	0.00855897
A0A1D6M725	60S ribosomal protein L30-2	100285769	60S ribosomal protein L30-2 OS=Zea mays OX=4577 GN=100285769 PE=4 SV=1 - [A0A1D6M725_MAIZE]	11.6291	9.83252	2.18591	0.00231722
B4F8K1	60S ribosomal protein L7-2	100191368	60S ribosomal protein L7-2 OS=Zea mays OX=4577 GN=100191368 PE=2 SV=1 - [B4F8K1_MAIZE]	28.4676	10.0815	2.15171	0.010043
B6TNF1	Calnexin homolog1	100283947	Calnexin homolog1 OS=Zea mays OX=4577 GN=100283947 PE=2 SV=1 - [B6TNF1_MAIZE]	60.3635	4.85596	2.13455	0.0266556
B4FMS0	NHP2-like protein 1	103633413	NHP2-like protein 1 OS=Zea mays OX=4577 GN=103633413 PE=2 SV=1 - [B4FMS0_MAIZE]	13.7383	7.12256	2.10634	0.00904677
B4FAV1	Uncharacterized protein		Uncharacterized protein OS=Zea mays OX=4577 PE=2 SV=1 - [B4FAV1_MAIZE]	23.0139	6.50732	2.08037	0.00826352
A0A1D6GY58	Translationally-controlled tumor protein-like protein	103626513	Translationally-controlled tumor protein-like protein OS=Zea mays OX=4577 GN=103626513 PE=3 SV=1 - [A0A1D6GY58_MAIZE]	13.7991	5.33838	2.06753	0.00734113
A0A1D6EXC9	60S ribosomal protein L44	103633242	60S ribosomal protein L44 OS=Zea mays OX=4577 GN=103633242 PE=3 SV=1 - [A0A1D6EXC9_MAIZE]	11.9455	10.1987	2.0662	0.0148499
B6UE22	Translationally-controlled tumor protein		Translationally-controlled tumor protein OS=Zea mays OX=4577 PE=2 SV=1 - [B6UE22_MAIZE]	17.5508	4.80518	2.06477	0.0146946
B8A1R8	5-methyltetrahydropteroyltriglutamate--homocysteine methyltransferase 1	541714	5-methyltetrahydropteroyltriglutamate--homocysteine methyltransferase 1 OS=Zea mays OX=4577 GN=541714 PE=2 SV=1 - [B8A1R8_MAIZE]	84.5654	6.17627	2.06434	0.00202564
B6TG58	GTP-binding protein SAR1A		GTP-binding protein SAR1A OS=Zea mays OX=4577 PE=2 SV=1 - [B6TG58_MAIZE]	22.0724	7.48877	2.04281	0.0196922
B6SID7	Late embryogenesis abundant protein, group 3	542216	Late embryogenesis abundant protein, group 3 OS=Zea mays OX=4577 GN=542216 PE=2 SV=1 - [B6SID7_MAIZE]	18.5881	8.22119	2.03482	0.0301173
B4FAB1	Succinate dehydrogenase [ubiquinone] iron-sulfur subunit, mitochondrial		Succinate dehydrogenase [ubiquinone] iron-sulfur subunit, mitochondrial OS=Zea mays OX=4577 PE=2 SV=1 - [B4FAB1_MAIZE]	22.7612	7.73779	2.02567	0.00628046
B4FGM4	Endothelial differentiation-related factor 1	100193883	Endothelial differentiation-related factor 1 OS=Zea mays OX=4577 GN=100193883 PE=2 SV=1 - [B4FGM4_MAIZE]	15.6384	9.94971	2.01981	0.0415106
B4FNV6	40S ribosomal protein S24		40S ribosomal protein S24 OS=Zea mays OX=4577 PE=2 SV=1 - [B4FNV6_MAIZE]	13.4472	9.99365	2.00271	0.00593683
B6T2K5	60S ribosomal protein L35	100282013	60S ribosomal protein L35 OS=Zea mays OX=4577 GN=100282013 PE=2 SV=1 - [B6T2K5_MAIZE]	14.3095	11.2974	1.99218	0.00127444
B4FV12	Non-specific lipid-transfer protein 2	100284199	Non-specific lipid-transfer protein 2 OS=Zea mays OX=4577 GN=100284199 PE=2 SV=1 - [B4FV12_MAIZE]	10.2671	8.42627	1.99168	0.00083803
A0A1D6ES24	Fasciclin-like arabinogalactan protein 7	103647534	Fasciclin-like arabinogalactan protein 7 OS=Zea mays OX=4577 GN=103647534 PE=4 SV=1 - [A0A1D6ES24_MAIZE]	27.2524	9.20264	1.98268	0.0314289
B4FJK0	Histone H2A	100216750	Histone H2A OS=Zea mays OX=4577 GN=100216750 PE=2 SV=1 - [B4FJK0_MAIZE]	16.6896	10.6821	1.94593	0.0253626
B4FUU9	Late embryogenesis abundant (LEA) hydroxyproline-rich glycoprotein family	100273348	Late embryogenesis abundant (LEA) hydroxyproline-rich glycoprotein family OS=Zea mays OX=4577 GN=100273348 PE=2 SV=1 - [B4FUU9_MAIZE]	30.2699	10.0815	1.94008	0.00772673
B4FQ03	60S ribosomal protein L7-2		60S ribosomal protein L7-2 OS=Zea mays OX=4577 PE=2 SV=1 - [B4FQ03_MAIZE]	28.3986	10.0962	1.93273	8.65365e-05
B4FWB5	Uncharacterized protein		Uncharacterized protein OS=Zea mays OX=4577 PE=2 SV=1 - [B4FWB5_MAIZE]	15.478	8.14795	1.91499	0.00995516
A0A1D6DTX7	Protein DJ-1 homolog D	100280536	Protein DJ-1 homolog D OS=Zea mays OX=4577 GN=100280536 PE=4 SV=1 - [A0A1D6DTX7_MAIZE]	35.1876	5.49072	1.90465	0.00026595
A0A1D6EKS5	Spermidine synthase 2	ZEAMMB73_Zm00001d005159	Spermidine synthase 2 OS=Zea mays OX=4577 GN=ZEAMMB73_Zm00001d005159 PE=4 SV=1 - [A0A1D6EKS5_MAIZE]	17.923	5.09717	1.89261	0.000162574
A0A317Y694	5-methyltetrahydropteroyltriglutamate--homocysteine methyltransferase 1	Os12g0623900	5-methyltetrahydropteroyltriglutamate--homocysteine methyltransferase 1 OS=Zea mays OX=4577 GN=Os12g0623900 PE=3 SV=1 - [A0A317Y694_MAIZE]	84.4773	6.20166	1.89105	0.000181113
B6SN85	H/ACA ribonucleoprotein complex subunit 3-like protein	ZEAMMB73_Zm00001d017242	H/ACA ribonucleoprotein complex subunit 3-like protein OS=Zea mays OX=4577 GN=ZEAMMB73_Zm00001d017242 PE=2 SV=1 - [B6SN85_MAIZE]	7.55001	9.89111	1.88564	0.000166396
A0A1D6NLC8	Mitochondrial ATP synthase subunit G protein	100283237	Mitochondrial ATP synthase subunit G protein OS=Zea mays OX=4577 GN=100283237 PE=4 SV=1 - [A0A1D6NLC8_MAIZE]	7.09267	9.59814	1.88218	3.13287e-06
B4G1X9	Uncharacterized protein		Uncharacterized protein OS=Zea mays OX=4577 PE=2 SV=1 - [B4G1X9_MAIZE]	46.7822	5.07178	1.87533	0.00580513
B6TB97	40S ribosomal protein S3	100282772	40S ribosomal protein S3 OS=Zea mays OX=4577 GN=100282772 PE=2 SV=1 - [B6TB97_MAIZE]	25.5416	9.49561	1.87275	0.0062483
B4FC26	Ypt homolog4	100502159	Ypt homolog4 OS=Zea mays OX=4577 GN=100502159 PE=2 SV=1 - [B4FC26_MAIZE]	22.4622	5.70654	1.87132	0.00803736
B4FAE1	Ras-related protein RABD2c	100191848	Ras-related protein RABD2c OS=Zea mays OX=4577 GN=100191848 PE=2 SV=1 - [B4FAE1_MAIZE]	22.4922	5.2749	1.84701	0.00128055
B4FM96	UMP-CMP kinase	100282335	UMP-CMP kinase OS=Zea mays OX=4577 GN=100282335 PE=2 SV=1 - [B4FM96_MAIZE]	23.4061	5.74463	1.84433	0.00167093
K7VRI2	Vacuolar proton pump homolog1	ZEAMMB73_Zm00001d045139	Vacuolar proton pump homolog1 OS=Zea mays OX=4577 GN=ZEAMMB73_Zm00001d045139 PE=3 SV=1 - [K7VRI2_MAIZE]	79.5293	5.40186	1.83815	0.00279831
Q6VWJ0	Caffeoyl-CoA 3-O-methyltransferase 1	ccoaomt1	Caffeoyl-CoA 3-O-methyltransferase 1 OS=Zea mays OX=4577 GN=ccoaomt1 PE=4 SV=1 - [Q6VWJ0_MAIZE]	28.8587	5.30029	1.83403	0.0154241
A0A1D6EP74	Proton pump-interactor 1	103647378	Proton pump-interactor 1 OS=Zea mays OX=4577 GN=103647378 PE=4 SV=1 - [A0A1D6EP74_MAIZE]	53.2761	9.11475	1.825	0.0114745
K7TT73	40S ribosomal protein S3-1	100274348	40S ribosomal protein S3-1 OS=Zea mays OX=4577 GN=100274348 PE=3 SV=1 - [K7TT73_MAIZE]	25.4326	9.5249	1.81864	0.00454731
B4FRJ7	Fumarylacetoacetate (FAA) hydrolase family	100272625	Fumarylacetoacetate (FAA) hydrolase family OS=Zea mays OX=4577 GN=100272625 PE=2 SV=1 - [B4FRJ7_MAIZE]	24.3798	5.43994	1.81801	0.0156892
B6TDH5	Ubiquitin-conjugating enzyme E2-17 kDa		Ubiquitin-conjugating enzyme E2-17 kDa OS=Zea mays OX=4577 PE=2 SV=1 - [B6TDH5_MAIZE]	21.8208	6.07471	1.80344	0.00742239
B4FWD0	NAD(P)H dehydrogenase (Quinone) FQR1	ZEAMMB73_Zm00001d012607	NAD(P)H dehydrogenase (Quinone) FQR1 OS=Zea mays OX=4577 GN=ZEAMMB73_Zm00001d012607 PE=2 SV=1 - [B4FWD0_MAIZE]	21.5457	6.37939	1.80343	0.0103778
K7W866	Decoy	ZEAMMB73_Zm00001d045819	Decoy OS=Zea mays OX=4577 GN=ZEAMMB73_Zm00001d045819 PE=4 SV=1 - [K7W866_MAIZE]	27.9914	9.11475	1.79188	0.00320199
A0A1D6INZ0	Rhodanese-like/PpiC domain-containing protein 12 chloroplastic	100216575	Rhodanese-like/PpiC domain-containing protein 12 chloroplastic OS=Zea mays OX=4577 GN=100216575 PE=4 SV=1 - [A0A1D6INZ0_MAIZE]	18.7656	6.68311	1.78415	0.0077331
B4FM15	60S ribosomal protein L28-1	100281129	60S ribosomal protein L28-1 OS=Zea mays OX=4577 GN=100281129 PE=2 SV=1 - [B4FM15_MAIZE]	16.3288	10.5503	1.77209	0.0011182
A0A1D6HTN9	Acidic endochitinase	ZEAMMB73_Zm00001d018966	Acidic endochitinase OS=Zea mays OX=4577 GN=ZEAMMB73_Zm00001d018966 PE=4 SV=1 - [A0A1D6HTN9_MAIZE]	33.7268	7.54736	1.76624	0.0309816
A0A1D6DYL0	Polyadenylate-binding protein RBP45C	100382170	Polyadenylate-binding protein RBP45C OS=Zea mays OX=4577 GN=100382170 PE=4 SV=1 - [A0A1D6DYL0_MAIZE]	20.0788	8.39697	1.7636	0.00511769
B6T2Y1	Peroxiredoxin-5		Peroxiredoxin-5 OS=Zea mays OX=4577 PE=2 SV=1 - [B6T2Y1_MAIZE]	23.8035	7.95752	1.76099	0.0031067
B6T746	Vesicle-associated membrane protein 722	100282409	Vesicle-associated membrane protein 722 OS=Zea mays OX=4577 GN=100282409 PE=2 SV=1 - [B6T746_MAIZE]	24.874	8.86572	1.75822	0.00709353
C0PK67	Uncharacterized protein		Uncharacterized protein OS=Zea mays OX=4577 PE=2 SV=1 - [C0PK67_MAIZE]	13.793	5.60498	1.75241	0.00334076
B6SX73	60S ribosomal protein L35-1	100282133	60S ribosomal protein L35-1 OS=Zea mays OX=4577 GN=100282133 PE=2 SV=1 - [B6SX73_MAIZE]	14.2914	11.2827	1.74691	0.00851162
B4FQL5	T-complex protein 1 subunit epsilon	100282671	T-complex protein 1 subunit epsilon OS=Zea mays OX=4577 GN=100282671 PE=2 SV=1 - [B4FQL5_MAIZE]	59.0336	5.8335	1.7428	0.000497107
B4FMH4	30S ribosomal protein S17	ZEAMMB73_Zm00001d050054	30S ribosomal protein S17 OS=Zea mays OX=4577 GN=ZEAMMB73_Zm00001d050054 PE=2 SV=1 - [B4FMH4_MAIZE]	11.6381	10.3306	1.74172	0.0095526
B6T1J3	40S ribosomal protein S13		40S ribosomal protein S13 OS=Zea mays OX=4577 PE=2 SV=1 - [B6T1J3_MAIZE]	16.8585	10.4478	1.74063	0.00577101
P29185	Chaperonin CPN60-1, mitochondrial	CPN60I	Chaperonin CPN60-1, mitochondrial OS=Zea mays OX=4577 GN=CPN60I PE=1 SV=2 - [CH61_MAIZE]	61.173	5.84619	1.73701	0.00528389
C0PDX2	Ribosomal protein		Ribosomal protein OS=Zea mays OX=4577 PE=2 SV=1 - [C0PDX2_MAIZE]	24.4051	9.86182	1.7341	0.000418263
B6T5F2	60S ribosomal protein L13	100282254	60S ribosomal protein L13 OS=Zea mays OX=4577 GN=100282254 PE=2 SV=1 - [B6T5F2_MAIZE]	23.8791	10.7114	1.73203	0.0221524
A0A1D6N0J5	Syntaxin-61	100273880	Syntaxin-61 OS=Zea mays OX=4577 GN=100273880 PE=4 SV=1 - [A0A1D6N0J5_MAIZE]	16.6441	5.37646	1.72718	0.00853461
A0A1D6H1R6	V-type proton ATPase catalytic subunit A	ZEAMMB73_Zm00001d015427	V-type proton ATPase catalytic subunit A OS=Zea mays OX=4577 GN=ZEAMMB73_Zm00001d015427 PE=4 SV=1 - [A0A1D6H1R6_MAIZE]	13.5829	7.28369	1.7143	0.0255635
B4FKG5	Abscisic acid stress ripening1	542304	Abscisic acid stress ripening1 OS=Zea mays OX=4577 GN=542304 PE=2 SV=1 - [B4FKG5_MAIZE]	15.5334	6.354	1.71293	0.00399778
A0A1D6KLH9	Mitochondrial 2-oxoglutarate/malate carrier protein	ZEAMMB73_Zm00001d031833	Mitochondrial 2-oxoglutarate/malate carrier protein OS=Zea mays OX=4577 GN=ZEAMMB73_Zm00001d031833 PE=3 SV=1 - [A0A1D6KLH9_MAIZE]	34.0671	10.3599	1.70238	0.00289985
A0A1D6P968	Dual specificity phosphatase Cdc25	100277184	Dual specificity phosphatase Cdc25 OS=Zea mays OX=4577 GN=100277184 PE=4 SV=1 - [A0A1D6P968_MAIZE]	10.0561	8.5874	1.6874	0.0225086
B6TMD7	Eukaryotic translation initiation factor 3 subunit J		Eukaryotic translation initiation factor 3 subunit J OS=Zea mays OX=4577 PE=2 SV=1 - [B6TMD7_MAIZE]	26.0081	4.99561	1.68524	0.0466357
C0P4E2	Wall-associated receptor kinase-like 20	100382104	Wall-associated receptor kinase-like 20 OS=Zea mays OX=4577 GN=100382104 PE=2 SV=1 - [C0P4E2_MAIZE]	69.0519	7.53271	1.68322	0.00499551
B4FAD9	UTP--glucose-1-phosphate uridylyltransferase	100191846	UTP--glucose-1-phosphate uridylyltransferase OS=Zea mays OX=4577 GN=100191846 PE=2 SV=1 - [B4FAD9_MAIZE]	52.1455	5.36377	1.6787	0.0206731
B6TIF7	Glucan endo-1,3-beta-glucosidase A6	100283442	Glucan endo-1,3-beta-glucosidase A6 OS=Zea mays OX=4577 GN=100283442 PE=2 SV=1 - [B6TIF7_MAIZE]	51.5558	7.66455	1.67264	0.00242812
B6SIV8	Histone H3	103636448	Histone H3 OS=Zea mays OX=4577 GN=103636448 PE=2 SV=1 - [B6SIV8_MAIZE]	15.2745	11.2974	1.67206	0.0145999
B4FDH0	Uncharacterized protein		Uncharacterized protein OS=Zea mays OX=4577 PE=2 SV=1 - [B4FDH0_MAIZE]	33.8502	7.78174	1.66692	0.0434687
C0PD84	Aspartyl protease AED1	101027224	Aspartyl protease AED1 OS=Zea mays OX=4577 GN=101027224 PE=2 SV=1 - [C0PD84_MAIZE]	48.0398	8.00146	1.66236	0.023469
C0P4T2	Patellin-1	100284590	Patellin-1 OS=Zea mays OX=4577 GN=100284590 PE=2 SV=1 - [C0P4T2_MAIZE]	62.2529	4.69092	1.65892	0.0357119
A0A1D6MDL2	40S ribosomal protein S12	100281932	40S ribosomal protein S12 OS=Zea mays OX=4577 GN=100281932 PE=3 SV=1 - [A0A1D6MDL2_MAIZE]	12.9546	6.65381	1.6546	8.67739e-05
B4FGC8	40S ribosomal protein S12	100193804	40S ribosomal protein S12 OS=Zea mays OX=4577 GN=100193804 PE=2 SV=1 - [B4FGC8_MAIZE]	14.9706	5.51611	1.64777	0.00636948
B8QWH5	Pathogenesis-related protein class I (Fragment)	pr1	Pathogenesis-related protein class I (Fragment) OS=Zea mays subsp. parviglumis OX=76912 GN=pr1 PE=3 SV=1 - [B8QWH5_ZEAMP]	16.5736	4.62744	1.6477	0.00991101
B8A1E3	Uncharacterized protein		Uncharacterized protein OS=Zea mays OX=4577 PE=2 SV=1 - [B8A1E3_MAIZE]	37.4873	5.69385	1.64498	0.0150532
B6SYZ9	Acyl carrier protein		Acyl carrier protein OS=Zea mays OX=4577 PE=2 SV=1 - [B6SYZ9_MAIZE]	14.4866	5.70654	1.64124	0.00799787
B6TI78	Peptidylprolyl isomerase		Peptidylprolyl isomerase OS=Zea mays OX=4577 PE=2 SV=1 - [B6TI78_MAIZE]	61.6528	5.2876	1.63809	0.00539533
B6TT37	Blue copper protein	UCC1_2	Blue copper protein OS=Zea mays OX=4577 GN=UCC1_2 PE=2 SV=1 - [B6TT37_MAIZE]	17.4144	5.70654	1.63407	0.0474335
C0HHC1	GTP-binding nuclear protein		GTP-binding nuclear protein OS=Zea mays OX=4577 PE=2 SV=1 - [C0HHC1_MAIZE]	19.8422	9.23193	1.63202	0.00938698
A0A1D6FWU2	Histone deacetylase102	ZEAMMB73_Zm00001d011139	Histone deacetylase102 OS=Zea mays OX=4577 GN=ZEAMMB73_Zm00001d011139 PE=4 SV=1 - [A0A1D6FWU2_MAIZE]	28.8809	5.10986	1.62541	0.00260982
K7UFY8	Polyadenylate-binding protein RBP47B	103653663	Polyadenylate-binding protein RBP47B OS=Zea mays OX=4577 GN=103653663 PE=4 SV=1 - [K7UFY8_MAIZE]	46.5787	8.55811	1.6232	0.0256643
B4FCB9	Peroxisomal membrane protein 11C	100192700	Peroxisomal membrane protein 11C OS=Zea mays OX=4577 GN=100192700 PE=2 SV=1 - [B4FCB9_MAIZE]	26.0392	9.77393	1.62261	0.0296789
A0A1R3N4Y1	Aquaporin PIP2-5	ZEAMMB73_Zm00001d003006	Aquaporin PIP2-5 OS=Zea mays OX=4577 GN=ZEAMMB73_Zm00001d003006 PE=3 SV=1 - [A0A1R3N4Y1_MAIZE]	29.8165	7.85498	1.61943	0.0287585
B4G1E6	Uncharacterized protein		Uncharacterized protein OS=Zea mays OX=4577 PE=2 SV=1 - [B4G1E6_MAIZE]	35.8769	5.09717	1.61847	0.00427738
A0A1D6LVG0	Blue copper protein	100283202	Blue copper protein OS=Zea mays OX=4577 GN=100283202 PE=4 SV=1 - [A0A1D6LVG0_MAIZE]	20.4681	6.90283	1.61275	0.00075141
A0A1D6QG35	Ubiquitin-activating enzyme E1 2	100279472	Ubiquitin-activating enzyme E1 2 OS=Zea mays OX=4577 GN=100279472 PE=3 SV=1 - [A0A1D6QG35_MAIZE]	112.775	5.2876	1.60918	0.0335056
B4FX40	Cysteine proteinase 1	ZEAMMB73_Zm00001d016446	Cysteine proteinase 1 OS=Zea mays OX=4577 GN=ZEAMMB73_Zm00001d016446 PE=2 SV=1 - [B4FX40_MAIZE]	40.2778	6.46826	1.60637	0.016578
C0PA18	Branched-chain-amino-acid aminotransferase		Branched-chain-amino-acid aminotransferase OS=Zea mays OX=4577 PE=2 SV=1 - [C0PA18_MAIZE]	35.3603	8.67529	1.6053	0.00174955
B4FET7	Putative mitochondrial import inner membrane translocase subunit TIM21	100193378	Putative mitochondrial import inner membrane translocase subunit TIM21 OS=Zea mays OX=4577 GN=100193378 PE=2 SV=1 - [B4FET7_MAIZE]	29.1251	9.39307	1.60149	0.0100338
A0A1D6ELG3	Polyadenylate-binding protein	ZEAMMB73_Zm00001d005276	Polyadenylate-binding protein OS=Zea mays OX=4577 GN=ZEAMMB73_Zm00001d005276 PE=3 SV=1 - [A0A1D6ELG3_MAIZE]	60.1258	8.04541	1.59427	0.00338174
A0A1D6Q1A8	THO complex subunit 4C	100280157	THO complex subunit 4C OS=Zea mays OX=4577 GN=100280157 PE=4 SV=1 - [A0A1D6Q1A8_MAIZE]	15.2627	8.99756	1.59418	0.00173045
A0A1D6QS59	Succinate-semialdehyde dehydrogenase mitochondrial	ZEAMMB73_Zm00001d053776	Succinate-semialdehyde dehydrogenase mitochondrial OS=Zea mays OX=4577 GN=ZEAMMB73_Zm00001d053776 PE=3 SV=1 - [A0A1D6QS59_MAIZE]	16.6298	9.61279	1.59255	0.00738988
A0A1D6KTT8	60S ribosomal protein L21-1	ZEAMMB73_Zm00001d032760	60S ribosomal protein L21-1 OS=Zea mays OX=4577 GN=ZEAMMB73_Zm00001d032760 PE=4 SV=1 - [A0A1D6KTT8_MAIZE]	18.7522	10.521	1.59069	0.000323995
B4FQ57	Histone H2A	ZEAMMB73_Zm00001d021707	Histone H2A OS=Zea mays OX=4577 GN=ZEAMMB73_Zm00001d021707 PE=2 SV=1 - [B4FQ57_MAIZE]	13.9406	10.228	1.59028	0.0294686
C0PGF7	Pectin acetylesterase		Pectin acetylesterase OS=Zea mays OX=4577 PE=2 SV=1 - [C0PGF7_MAIZE]	40.182	8.38232	1.58741	0.00307662
A0A1D6LHK0	Protein transport protein Sec61 subunit beta	ZEAMMB73_Zm00001d035610	Protein transport protein Sec61 subunit beta OS=Zea mays OX=4577 GN=ZEAMMB73_Zm00001d035610 PE=3 SV=1 - [A0A1D6LHK0_MAIZE]	10.6664	11.9272	1.58359	0.0157669
B4FAJ3	Senescence enhanced2b	542609	Senescence enhanced2b OS=Zea mays OX=4577 GN=542609 PE=2 SV=1 - [B4FAJ3_MAIZE]	52.944	5.78271	1.58309	0.00228562
C0P2L6	Uncharacterized protein		Uncharacterized protein OS=Zea mays OX=4577 PE=2 SV=1 - [C0P2L6_MAIZE]	10.8851	9.40771	1.57897	0.00443015
B6U3T7	Aquaporin TIP2.1		Aquaporin TIP2.1 OS=Zea mays OX=4577 PE=2 SV=1 - [B6U3T7_MAIZE]	25.1322	6.66846	1.57639	0.01494
A0A1D6P3H2	Protein kinase superfamily protein with octicosapeptide/Phox/Bem1p domain	ZEAMMB73_Zm00001d046569	Protein kinase superfamily protein with octicosapeptide/Phox/Bem1p domain OS=Zea mays OX=4577 GN=ZEAMMB73_Zm00001d046569 PE=4 SV=1 - [A0A1D6P3H2_MAIZE]	18.4023	5.52881	1.57601	0.00276024
B6TSH6	60S ribosomal protein L21		60S ribosomal protein L21 OS=Zea mays OX=4577 PE=2 SV=1 - [B6TSH6_MAIZE]	18.7952	10.4038	1.5649	0.00359948
B6SHW0	60S ribosomal protein L6	103653691	60S ribosomal protein L6 OS=Zea mays OX=4577 GN=103653691 PE=2 SV=1 - [B6SHW0_MAIZE]	24.2734	10.1401	1.55969	0.0365547
A0A096T2N3	Phospholipase D	100280265	Phospholipase D OS=Zea mays OX=4577 GN=100280265 PE=3 SV=1 - [A0A096T2N3_MAIZE]	95.254	6.58057	1.55212	0.0189216
B6T692	Surfactant protein B containing protein		Surfactant protein B containing protein OS=Zea mays OX=4577 PE=2 SV=1 - [B6T692_MAIZE]	25.892	5.8335	1.55138	0.048166
A0A1D6I675	Coatomer subunit zeta-2	541628	Coatomer subunit zeta-2 OS=Zea mays OX=4577 GN=541628 PE=4 SV=1 - [A0A1D6I675_MAIZE]	10.8076	9.5542	1.54242	0.0394642
A0A1D6PL20	Hydroxymethylglutaryl-CoA synthase	100285783	Hydroxymethylglutaryl-CoA synthase OS=Zea mays OX=4577 GN=100285783 PE=4 SV=1 - [A0A1D6PL20_MAIZE]	27.962	8.646	1.53641	0.0142572
B6SQI9	Uclacyanin-2		Uclacyanin-2 OS=Zea mays OX=4577 PE=2 SV=1 - [B6SQI9_MAIZE]	20.2331	8.83643	1.53467	0.000968901
B6TPJ3	Uncharacterized protein		Uncharacterized protein OS=Zea mays OX=4577 PE=2 SV=1 - [B6TPJ3_MAIZE]	26.7927	6.20166	1.53361	0.00726083
E5G401	ADP-glucose pyrophosphorylase embryo small subunit (Fragment)	Agp2	ADP-glucose pyrophosphorylase embryo small subunit (Fragment) OS=Zea mays subsp. mays OX=381124 GN=Agp2 PE=4 SV=1 - [E5G401_MAIZE]	32.9344	4.95752	1.53298	0.00178095
A0A1D6NLZ8	Cytochrome c oxidase polypeptide Vb	103651601	Cytochrome c oxidase polypeptide Vb OS=Zea mays OX=4577 GN=103651601 PE=4 SV=1 - [A0A1D6NLZ8_MAIZE]	11.6785	4.60205	1.53022	0.000723161
C0PHV6	Uncharacterized protein		Uncharacterized protein OS=Zea mays OX=4577 PE=2 SV=1 - [C0PHV6_MAIZE]	63.0018	5.70654	1.52703	0.0166317
C0PK05	Lactoylglutathione lyase		Lactoylglutathione lyase OS=Zea mays OX=4577 PE=2 SV=1 - [C0PK05_MAIZE]	32.3244	6.18896	1.52671	0.0141035
B4G1P1	Glutamine synthetase	542214	Glutamine synthetase OS=Zea mays OX=4577 GN=542214 PE=2 SV=1 - [B4G1P1_MAIZE]	39.2704	5.47803	1.52641	0.00859339
B6T1H0	40S ribosomal protein S6	542529	40S ribosomal protein S6 OS=Zea mays OX=4577 GN=542529 PE=2 SV=1 - [B6T1H0_MAIZE]	28.6277	10.7114	1.52092	0.00580219
B4FHE4	60S ribosomal protein L17-2	100194089	60S ribosomal protein L17-2 OS=Zea mays OX=4577 GN=100194089 PE=2 SV=1 - [B4FHE4_MAIZE]	19.3803	10.1401	1.51299	0.000817339
B6SND3	Acyl carrier protein	ZEAMMB73_Zm00001d038057	Acyl carrier protein OS=Zea mays OX=4577 GN=ZEAMMB73_Zm00001d038057 PE=2 SV=1 - [B6SND3_MAIZE]	13.6211	5.80811	1.50443	0.00693027
B4FQ26	IAA-amino acid hydrolase ILR1	100272708	IAA-amino acid hydrolase ILR1 OS=Zea mays OX=4577 GN=100272708 PE=2 SV=1 - [B4FQ26_MAIZE]	43.4361	6.52197	1.50214	0.0154448
B4FI53	60S ribosomal protein L32	100194289	60S ribosomal protein L32 OS=Zea mays OX=4577 GN=100194289 PE=2 SV=1 - [B4FI53_MAIZE]	15.7066	10.4185	1.49974	0.0172954
C0PN62	Uncharacterized protein		Uncharacterized protein OS=Zea mays OX=4577 PE=2 SV=1 - [C0PN62_MAIZE]	39.7914	6.53662	1.49177	0.0130444
B6TBW2	ATP synthase delta chain	100282837	ATP synthase delta chain OS=Zea mays OX=4577 GN=100282837 PE=2 SV=1 - [B6TBW2_MAIZE]	25.5498	9.37842	1.48878	0.0321659
A0A0B4J3C2	Elongation factor 1-alpha	ZEAMMB73_Zm00001d037873	Elongation factor 1-alpha OS=Zea mays OX=4577 GN=ZEAMMB73_Zm00001d037873 PE=3 SV=1 - [A0A0B4J3C2_MAIZE]	49.1357	9.12939	1.48738	0.0278843
K7UH13	Adenosine kinase 2	ZEAMMB73_Zm00001d051157	Adenosine kinase 2 OS=Zea mays OX=4577 GN=ZEAMMB73_Zm00001d051157 PE=4 SV=1 - [K7UH13_MAIZE]	36.9796	5.08447	1.48537	0.00436735
A0A1D6IMZ9	Peroxidase	ZEAMMB73_Zm00001d022457	Peroxidase OS=Zea mays OX=4577 GN=ZEAMMB73_Zm00001d022457 PE=3 SV=1 - [A0A1D6IMZ9_MAIZE]	33.1913	6.65381	1.48311	0.0352166
A0A1D6NSA5	NAD(P)H dehydrogenase C1	ZEAMMB73_Zm00001d044920	NAD(P)H dehydrogenase C1 OS=Zea mays OX=4577 GN=ZEAMMB73_Zm00001d044920 PE=4 SV=1 - [A0A1D6NSA5_MAIZE]	30.9922	11.3706	1.48223	0.005889
C4J0F8	Uncharacterized protein		Uncharacterized protein OS=Zea mays OX=4577 PE=2 SV=1 - [C4J0F8_MAIZE]	12.9901	10.6675	1.4821	0.00624521
A0A1D6MY10	60S ribosomal protein L6	ZEAMMB73_Zm00001d041756	60S ribosomal protein L6 OS=Zea mays OX=4577 GN=ZEAMMB73_Zm00001d041756 PE=3 SV=1 - [A0A1D6MY10_MAIZE]	47.5353	9.90576	1.48194	0.0248973
C0P4U8	Putative ATP synthase 24 kDa subunit mitochondrial	ZEAMMB73_Zm00001d053983	Putative ATP synthase 24 kDa subunit mitochondrial OS=Zea mays OX=4577 GN=ZEAMMB73_Zm00001d053983 PE=2 SV=1 - [C0P4U8_MAIZE]	27.5557	8.42627	1.47978	0.00202532
P25460	40S ribosomal protein S11	RPS11	40S ribosomal protein S11 OS=Zea mays OX=4577 GN=RPS11 PE=2 SV=1 - [RS11_MAIZE]	17.6786	10.5796	1.47256	0.0114849
B6TUK9	Basic blue protein	100284336	Basic blue protein OS=Zea mays OX=4577 GN=100284336 PE=2 SV=1 - [B6TUK9_MAIZE]	13.3939	9.93506	1.47231	0.0128745
B4F989	Actin-7	103635981	Actin-7 OS=Zea mays OX=4577 GN=103635981 PE=2 SV=1 - [B4F989_MAIZE]	41.6989	5.40186	1.46946	0.00311894
A0A1D6JTN4	Glutamine synthetase	ZEAMMB73_Zm00001d028260	Glutamine synthetase OS=Zea mays OX=4577 GN=ZEAMMB73_Zm00001d028260 PE=3 SV=1 - [A0A1D6JTN4_MAIZE]	36.8524	7.13721	1.46874	0.00297229
A0A1D6F974	Bifunctional inhibitor/lipid-transfer protein/seed storage 2S albumin superfamily protein	103648254	Bifunctional inhibitor/lipid-transfer protein/seed storage 2S albumin superfamily protein OS=Zea mays OX=4577 GN=103648254 PE=3 SV=1 - [A0A1D6F974_MAIZE]	16.8506	8.32373	1.46684	0.0133192
A0A1D6LN77	Peptidyl-prolyl cis-trans isomerase	ZEAMMB73_Zm00001d036442	Peptidyl-prolyl cis-trans isomerase OS=Zea mays OX=4577 GN=ZEAMMB73_Zm00001d036442 PE=3 SV=1 - [A0A1D6LN77_MAIZE]	23.1639	9.5542	1.46557	0.034168
B4FBC2	GDP-mannose 35-epimerase	100192102	GDP-mannose 35-epimerase OS=Zea mays OX=4577 GN=100192102 PE=2 SV=1 - [B4FBC2_MAIZE]	42.9382	6.41748	1.46556	0.00265445
B6TMB2	PDIL2-2-Zea mays protein disulfide isomerase		PDIL2-2-Zea mays protein disulfide isomerase OS=Zea mays OX=4577 PE=2 SV=1 - [B6TMB2_MAIZE]	40.1157	6.22705	1.4654	0.028752
A0A1D6KEP0	Serine hydroxymethyltransferase	ZEAMMB73_Zm00001d030859	Serine hydroxymethyltransferase OS=Zea mays OX=4577 GN=ZEAMMB73_Zm00001d030859 PE=3 SV=1 - [A0A1D6KEP0_MAIZE]	58.5097	7.73779	1.46465	0.0464948
A0A1D6HFM9	High mobility group box protein2	541951	High mobility group box protein2 OS=Zea mays OX=4577 GN=541951 PE=4 SV=1 - [A0A1D6HFM9_MAIZE]	10.8219	4.67822	1.4645	0.00613269
Q9S7Z7	HMGI/Y protein	hmgi/y	HMGI/Y protein OS=Zea mays OX=4577 GN=hmgi/y PE=4 SV=1 - [Q9S7Z7_MAIZE]	19.7494	10.3892	1.46446	0.0289884
B6T6S5	Glucose-6-phosphate 1-epimerase	100282376	Glucose-6-phosphate 1-epimerase OS=Zea mays OX=4577 GN=100282376 PE=2 SV=1 - [B6T6S5_MAIZE]	36.6037	6.69775	1.46366	0.0361956
B6SPF6	Uncharacterized protein		Uncharacterized protein OS=Zea mays OX=4577 PE=2 SV=1 - [B6SPF6_MAIZE]	5.39391	9.87646	1.46222	0.00450485
B4FRC9	Aldolase-type TIM barrel family protein	100284080	Aldolase-type TIM barrel family protein OS=Zea mays OX=4577 GN=100284080 PE=2 SV=1 - [B4FRC9_MAIZE]	46.2172	7.32764	1.46027	0.0151382
C0HG50	Uncharacterized protein		Uncharacterized protein OS=Zea mays OX=4577 PE=2 SV=1 - [C0HG50_MAIZE]	47.1981	6.55127	1.45822	0.00434683
B4FNZ2	Tubulin-specific chaperone A		Tubulin-specific chaperone A OS=Zea mays OX=4577 PE=2 SV=1 - [B4FNZ2_MAIZE]	12.5014	5.09717	1.45721	0.029698
B4FTJ6	Mitochondrial phosphate carrier protein 3 mitochondrial	103627788	Mitochondrial phosphate carrier protein 3 mitochondrial OS=Zea mays OX=4577 GN=103627788 PE=2 SV=1 - [B4FTJ6_MAIZE]	38.575	9.18799	1.45604	0.00601836
A0A1D6LFD9	LIM domain-containing protein WLIM1	541782	LIM domain-containing protein WLIM1 OS=Zea mays OX=4577 GN=541782 PE=4 SV=1 - [A0A1D6LFD9_MAIZE]	14.1779	8.95361	1.45238	0.000576623
B4G0K4	Phosphoglycerate kinase	100274579	Phosphoglycerate kinase OS=Zea mays OX=4577 GN=100274579 PE=2 SV=1 - [B4G0K4_MAIZE]	42.4127	5.87158	1.45016	0.00916875
B6SL60	Thioredoxin	100856910	Thioredoxin OS=Zea mays OX=4577 GN=100856910 PE=2 SV=1 - [B6SL60_MAIZE]	14.6123	6.55127	1.44993	0.00805934
K7VZN8	60S ribosomal protein L22-2	ZEAMMB73_Zm00001d047500	60S ribosomal protein L22-2 OS=Zea mays OX=4577 GN=ZEAMMB73_Zm00001d047500 PE=4 SV=1 - [K7VZN8_MAIZE]	14.2776	9.72998	1.44928	0.00578594
B6SUM0	Vacuolar protein sorting-associated protein 29	100281359	Vacuolar protein sorting-associated protein 29 OS=Zea mays OX=4577 GN=100281359 PE=2 SV=1 - [B6SUM0_MAIZE]	20.8668	6.65381	1.44927	0.0192642
B4FH68	Peroxidase	100194034	Peroxidase OS=Zea mays OX=4577 GN=100194034 PE=2 SV=1 - [B4FH68_MAIZE]	37.4708	6.66846	1.44561	0.0370029
Q0GR16	NADH-ubiquinone oxidoreductase chain 6	nad6	NADH-ubiquinone oxidoreductase chain 6 OS=Zea mays subsp. parviglumis OX=76912 GN=nad6 PE=3 SV=1 - [Q0GR16_ZEAMP]	24.8764	9.08545	1.44543	0.00232164
B4FDS5	Cytochrome P450 98A3	100274274	Cytochrome P450 98A3 OS=Zea mays OX=4577 GN=100274274 PE=2 SV=1 - [B4FDS5_MAIZE]	58.2375	8.99756	1.44531	0.0103024
Q5NKN3	DNA-binding protein MNB1B	nfd103	DNA-binding protein MNB1B OS=Zea mays OX=4577 GN=nfd103 PE=2 SV=1 - [Q5NKN3_MAIZE]	17.1356	5.94775	1.44508	0.000203434
B8A0Y5	Uncharacterized protein		Uncharacterized protein OS=Zea mays OX=4577 PE=2 SV=1 - [B8A0Y5_MAIZE]	30.456	6.20166	1.44422	0.0168792
A0A096S3Z9	Diacylglycerol kinase	100284664	Diacylglycerol kinase OS=Zea mays OX=4577 GN=100284664 PE=3 SV=1 - [A0A096S3Z9_MAIZE]	54.5279	7.91357	1.44312	0.00727008
B4FEE3	60S ribosomal protein L27	103642077	60S ribosomal protein L27 OS=Zea mays OX=4577 GN=103642077 PE=2 SV=1 - [B4FEE3_MAIZE]	15.6267	10.4624	1.44011	0.0264626
A0A1D6EGZ9	Eukaryotic initiation factor 5C CG2922-PF, isoform F	ZEAMMB73_Zm00001d004677	Eukaryotic initiation factor 5C CG2922-PF, isoform F OS=Zea mays OX=4577 GN=ZEAMMB73_Zm00001d004677 PE=4 SV=1 - [A0A1D6EGZ9_MAIZE]	43.8528	5.32568	1.43747	0.000124638
B6TPE4	Glutamate-1-semialdehyde 2,1-aminomutase		Glutamate-1-semialdehyde 2,1-aminomutase OS=Zea mays OX=4577 PE=2 SV=1 - [B6TPE4_MAIZE]	49.9944	6.55127	1.4343	0.0142006
A0A1D6PN47	ARM repeat superfamily protein	ZEAMMB73_Zm00001d048628	ARM repeat superfamily protein OS=Zea mays OX=4577 GN=ZEAMMB73_Zm00001d048628 PE=4 SV=1 - [A0A1D6PN47_MAIZE]	114.049	4.64014	1.43372	0.0324683
A0A1D6HNL5	26S protease regulatory subunit 6A homolog A	ZEAMMB73_Zm00001d018409	26S protease regulatory subunit 6A homolog A OS=Zea mays OX=4577 GN=ZEAMMB73_Zm00001d018409 PE=3 SV=1 - [A0A1D6HNL5_MAIZE]	46.9452	5.10986	1.42927	0.0094058
A0A1D6HVU5	Cellulose synthase4	542624	Cellulose synthase4 OS=Zea mays OX=4577 GN=542624 PE=3 SV=1 - [A0A1D6HVU5_MAIZE]	87.5334	8.55811	1.42793	0.0174301
B6T9I8	Uncharacterized protein	100276373	Uncharacterized protein OS=Zea mays OX=4577 GN=100276373 PE=2 SV=1 - [B6T9I8_MAIZE]	27.9146	8.26514	1.42607	0.00994218
C0P5Y3	5-methyltetrahydropteroyltriglutamate--homocysteine methyltransferase 1	541942	5-methyltetrahydropteroyltriglutamate--homocysteine methyltransferase 1 OS=Zea mays OX=4577 GN=541942 PE=2 SV=1 - [C0P5Y3_MAIZE]	84.4393	5.77002	1.42416	0.00220687
A0A317Y4C0	Ran-binding protein 1 c	RANBP1C_1	Ran-binding protein 1 c OS=Zea mays OX=4577 GN=RANBP1C_1 PE=4 SV=1 - [A0A317Y4C0_MAIZE]	23.1493	4.77979	1.42393	0.048003
A0A1D6NYF1	Restorer of fertility2	732806	Restorer of fertility2 OS=Zea mays OX=4577 GN=732806 PE=3 SV=1 - [A0A1D6NYF1_MAIZE]	55.6588	6.48096	1.42283	0.000438561
B7ZX16	Uncharacterized protein		Uncharacterized protein OS=Zea mays OX=4577 PE=2 SV=1 - [B7ZX16_MAIZE]	17.1552	8.44092	1.42241	0.0191497
C0P4K4	L-ascorbate peroxidase S chloroplastic/mitochondrial	100193740	L-ascorbate peroxidase S chloroplastic/mitochondrial OS=Zea mays OX=4577 GN=100193740 PE=2 SV=1 - [C0P4K4_MAIZE]	34.1126	7.92822	1.42178	0.00704387
A0A317YAW0	Germin-like protein 3-6	Os03g0694000_0	Germin-like protein 3-6 OS=Zea mays OX=4577 GN=Os03g0694000_0 PE=3 SV=1 - [A0A317YAW0_MAIZE]	23.7573	6.31592	1.42097	0.00388028
B6T6B3	Eukaryotic translation initiation factor 3 subunit M		Eukaryotic translation initiation factor 3 subunit M OS=Zea mays OX=4577 PE=2 SV=1 - [B6T6B3_MAIZE]	46.2399	5.30029	1.42086	6.19091e-05
B6SZS2	40S ribosomal protein S9	100192774	40S ribosomal protein S9 OS=Zea mays OX=4577 GN=100192774 PE=2 SV=1 - [B6SZS2_MAIZE]	22.5331	10.2134	1.42082	0.0196928
K7UEK4	UDP-N-acetylglucosamine diphosphorylase 2	100383496	UDP-N-acetylglucosamine diphosphorylase 2 OS=Zea mays OX=4577 GN=100383496 PE=4 SV=1 - [K7UEK4_MAIZE]	54.8207	6.62451	1.41866	0.00183761
B4FFV2	SWIB/MDM2 domain superfamily protein	ZEAMMB73_Zm00001d053979	SWIB/MDM2 domain superfamily protein OS=Zea mays OX=4577 GN=ZEAMMB73_Zm00001d053979 PE=2 SV=1 - [B4FFV2_MAIZE]	13.9966	10.521	1.41845	0.0043665
B6SUP6	Mitochondrial import inner membrane translocase subunit Tim17		Mitochondrial import inner membrane translocase subunit Tim17 OS=Zea mays OX=4577 PE=2 SV=1 - [B6SUP6_MAIZE]	22.5951	5.33838	1.41542	0.000832943
B6UDY2	60S ribosomal protein L17		60S ribosomal protein L17 OS=Zea mays OX=4577 PE=2 SV=1 - [B6UDY2_MAIZE]	19.4903	10.2573	1.41381	0.00141327
C0PA04	Uncharacterized protein		Uncharacterized protein OS=Zea mays OX=4577 PE=2 SV=1 - [C0PA04_MAIZE]	20.5997	6.78564	1.4028	0.0254154
B6SRI4	14-3-3-like protein	103643291	14-3-3-like protein OS=Zea mays OX=4577 GN=103643291 PE=2 SV=1 - [B6SRI4_MAIZE]	28.9295	4.88135	1.39863	0.000465624
B4FLE0	O-methyltransferase ZRP4	ZEAMMB73_Zm00001d049020	O-methyltransferase ZRP4 OS=Zea mays OX=4577 GN=ZEAMMB73_Zm00001d049020 PE=2 SV=1 - [B4FLE0_MAIZE]	39.6753	5.93506	1.39744	0.00923168
B4FNP2	Phosphoribosylglycinamide formyltransferase chloroplastic	100272448	Phosphoribosylglycinamide formyltransferase chloroplastic OS=Zea mays OX=4577 GN=100272448 PE=2 SV=1 - [B4FNP2_MAIZE]	30.6872	8.99756	1.39709	0.00327734
A0A1D6P5E3	Grx_C4-glutaredoxin subgroup I	100282495	Grx_C4-glutaredoxin subgroup I OS=Zea mays OX=4577 GN=100282495 PE=4 SV=1 - [A0A1D6P5E3_MAIZE]	12.8558	8.6167	1.39555	0.00491897
B4F8B1	Transcription factor IIS protein	100274429	Transcription factor IIS protein OS=Zea mays OX=4577 GN=100274429 PE=2 SV=1 - [B4F8B1_MAIZE]	41.0969	8.96826	1.39438	0.0111407
B6T3X3	Hydrolase, carbon-nitrogen family		Hydrolase, carbon-nitrogen family OS=Zea mays OX=4577 PE=2 SV=1 - [B6T3X3_MAIZE]	24.7444	5.12256	1.39	0.00846114
A0A317Y8A9	Mitochondrial import receptor subunit TOM40-1	TOM40-1_3	Mitochondrial import receptor subunit TOM40-1 OS=Zea mays OX=4577 GN=TOM40-1_3 PE=4 SV=1 - [A0A317Y8A9_MAIZE]	34.8755	7.79639	1.38899	0.034622
B4FL64	Ribosomal protein L19	100282430	Ribosomal protein L19 OS=Zea mays OX=4577 GN=100282430 PE=2 SV=1 - [B4FL64_MAIZE]	24.0994	11.4438	1.38541	0.015175
A0A1D6NS07	GLABRA2 expression modulator	ZEAMMB73_Zm00001d044880	GLABRA2 expression modulator OS=Zea mays OX=4577 GN=ZEAMMB73_Zm00001d044880 PE=4 SV=1 - [A0A1D6NS07_MAIZE]	18.4793	7.2251	1.38512	0.00125632
A0A1D6J241	Sucrose-phosphatase 2	542661	Sucrose-phosphatase 2 OS=Zea mays OX=4577 GN=542661 PE=4 SV=1 - [A0A1D6J241_MAIZE]	37.0789	6.29053	1.38474	0.00126049
B6U893	Uncharacterized protein		Uncharacterized protein OS=Zea mays OX=4577 PE=2 SV=1 - [B6U893_MAIZE]	12.574	8.49951	1.38335	0.0365806
K7ULE9	Extensin-like protein	103641995	Extensin-like protein OS=Zea mays OX=4577 GN=103641995 PE=4 SV=1 - [K7ULE9_MAIZE]	13.0568	8.35303	1.38033	0.0293321
B4FS65	Cysteine proteinases superfamily protein	ZEAMMB73_Zm00001d005391	Cysteine proteinases superfamily protein OS=Zea mays OX=4577 GN=ZEAMMB73_Zm00001d005391 PE=2 SV=1 - [B4FS65_MAIZE]	39.9305	6.771	1.3788	0.00633667
A0A1D6ELY8	Arogenate dehydratase	ZEAMMB73_Zm00001d005351	Arogenate dehydratase OS=Zea mays OX=4577 GN=ZEAMMB73_Zm00001d005351 PE=4 SV=1 - [A0A1D6ELY8_MAIZE]	45.5151	6.63916	1.37646	0.00393007
B6T999	Notchless-like protein isoform 1	100282591	Notchless-like protein isoform 1 OS=Zea mays OX=4577 GN=100282591 PE=2 SV=1 - [B6T999_MAIZE]	52.1134	8.45557	1.37069	0.000837469
B4FSM5	Peroxiredoxin-2F mitochondrial	100273860	Peroxiredoxin-2F mitochondrial OS=Zea mays OX=4577 GN=100273860 PE=2 SV=1 - [B4FSM5_MAIZE]	20.7227	8.36768	1.37066	0.00463229
A0A1D6N5J4	Pectinesterase	ZEAMMB73_Zm00001d042625	Pectinesterase OS=Zea mays OX=4577 GN=ZEAMMB73_Zm00001d042625 PE=4 SV=1 - [A0A1D6N5J4_MAIZE]	24.251	6.94678	1.37044	0.0385193
B6SP44	Glutamate carboxypeptidase 2	100280900	Glutamate carboxypeptidase 2 OS=Zea mays OX=4577 GN=100280900 PE=2 SV=1 - [B6SP44_MAIZE]	80.5786	6.39209	1.36626	0.0245471
A0A1D6L9A0	40S ribosomal protein S26	100193263	40S ribosomal protein S26 OS=Zea mays OX=4577 GN=100193263 PE=3 SV=1 - [A0A1D6L9A0_MAIZE]	14.8218	11.0337	1.36349	0.0046507
B8A326	Plasma membrane ATPase		Plasma membrane ATPase OS=Zea mays OX=4577 PE=2 SV=1 - [B8A326_MAIZE]	104.733	6.60986	1.36298	0.0346595
C0P4G2	Allene oxide synthase1	542150	Allene oxide synthase1 OS=Zea mays OX=4577 GN=542150 PE=2 SV=1 - [C0P4G2_MAIZE]	53.0013	7.00537	1.36075	0.00527607
A0A1D6L861	50S ribosomal protein L4	rplD	50S ribosomal protein L4 OS=Zea mays OX=4577 GN=rplD PE=3 SV=1 - [A0A1D6L861_MAIZE]	32.6877	10.3599	1.35932	0.00215915
A0A1D6F256	Peroxidase	103647877	Peroxidase OS=Zea mays OX=4577 GN=103647877 PE=3 SV=1 - [A0A1D6F256_MAIZE]	39.5572	8.85107	1.3577	0.00092158
B4FFP6	Nascent polypeptide-associated complex subunit beta	100193616	Nascent polypeptide-associated complex subunit beta OS=Zea mays OX=4577 GN=100193616 PE=2 SV=1 - [B4FFP6_MAIZE]	17.3041	8.85107	1.35502	0.00767777
B6TMW7	Transaminase/ transferase, transferring nitrogenous groups	100285201	Transaminase/ transferase, transferring nitrogenous groups OS=Zea mays OX=4577 GN=100285201 PE=2 SV=1 - [B6TMW7_MAIZE]	43.5031	5.19873	1.35449	0.00660491
B6TEJ4	Peptidase C15 pyroglutamyl peptidase I-like	100283087	Peptidase C15 pyroglutamyl peptidase I-like OS=Zea mays OX=4577 GN=100283087 PE=2 SV=1 - [B6TEJ4_MAIZE]	23.9904	7.1665	1.35351	0.0218962
B4FNM4	60S acidic ribosomal protein P0	ZEAMMB73_Zm00001d035201	60S acidic ribosomal protein P0 OS=Zea mays OX=4577 GN=ZEAMMB73_Zm00001d035201 PE=2 SV=1 - [B4FNM4_MAIZE]	34.4671	5.30029	1.35205	0.000982322
K7VIL3	Methionine S-methyltransferase	541786	Methionine S-methyltransferase OS=Zea mays OX=4577 GN=541786 PE=3 SV=1 - [K7VIL3_MAIZE]	120.195	5.88428	1.35076	0.000655774
B4FQR3	Aldose reductase	AR4	Aldose reductase OS=Zea mays OX=4577 GN=AR4 PE=2 SV=1 - [B4FQR3_MAIZE]	36.0836	6.44287	1.34971	0.00351895
A0A1D6NKW5	SNF1-related protein kinase regulatory subunit gamma-1-like	100286384	SNF1-related protein kinase regulatory subunit gamma-1-like OS=Zea mays OX=4577 GN=100286384 PE=4 SV=1 - [A0A1D6NKW5_MAIZE]	31.1183	4.93213	1.34739	0.0109487
B4FSL2	40S ribosomal protein S25-2	ZEAMMB73_Zm00001d031939	40S ribosomal protein S25-2 OS=Zea mays OX=4577 GN=ZEAMMB73_Zm00001d031939 PE=2 SV=1 - [B4FSL2_MAIZE]	12.0097	10.5942	1.34681	0.02419
A0A1D6HCE3	26S proteasome non-ATPase regulatory subunit 6-like protein	100282303	26S proteasome non-ATPase regulatory subunit 6-like protein OS=Zea mays OX=4577 GN=100282303 PE=4 SV=1 - [A0A1D6HCE3_MAIZE]	41.1395	6.39209	1.345	5.96304e-05
B4FNZ6	Seven transmembrane domain protein	100273830	Seven transmembrane domain protein OS=Zea mays OX=4577 GN=100273830 PE=2 SV=1 - [B4FNZ6_MAIZE]	25.4573	8.44092	1.34299	0.00487147
A0A1D6H8V5	Ubiquitin-associated (UBA)/TS-N domain-containing protein	ZEAMMB73_Zm00001d016552	Ubiquitin-associated (UBA)/TS-N domain-containing protein OS=Zea mays OX=4577 GN=ZEAMMB73_Zm00001d016552 PE=4 SV=1 - [A0A1D6H8V5_MAIZE]	12.5725	6.12549	1.34137	0.00290238
B6T098	60S ribosomal protein L34		60S ribosomal protein L34 OS=Zea mays OX=4577 PE=2 SV=1 - [B6T098_MAIZE]	13.7358	11.4878	1.34119	0.00249767
B6SJ40	Pollen Ole e 1 allergen and extensin family protein	MGS1_3	Pollen Ole e 1 allergen and extensin family protein OS=Zea mays OX=4577 GN=MGS1_3 PE=2 SV=1 - [B6SJ40_MAIZE]	18.4433	7.6499	1.33989	0.0105689
A0A1D6LDB9	Uncharacterized protein	ZEAMMB73_Zm00001d034970	Uncharacterized protein OS=Zea mays OX=4577 GN=ZEAMMB73_Zm00001d034970 PE=4 SV=1 - [A0A1D6LDB9_MAIZE]	44.453	6.23975	1.33945	0.0370423
B4FVJ0	60S ribosomal protein L4-1	ZEAMMB73_Zm00001d007824	60S ribosomal protein L4-1 OS=Zea mays OX=4577 GN=ZEAMMB73_Zm00001d007824 PE=2 SV=1 - [B4FVJ0_MAIZE]	44.3839	10.5063	1.33928	0.00379126
B4FER8	Acyl-CoA-binding protein		Acyl-CoA-binding protein OS=Zea mays OX=4577 PE=2 SV=1 - [B4FER8_MAIZE]	10.12	5.07178	1.33879	0.00150158
A0A1D6FYR3	Transcriptional corepressor LEUNIG	100217300	Transcriptional corepressor LEUNIG OS=Zea mays OX=4577 GN=100217300 PE=4 SV=1 - [A0A1D6FYR3_MAIZE]	90.7446	8.04541	1.33711	0.0309193
B6TSB3	Glucose-6-phosphate 1-dehydrogenase	100284317	Glucose-6-phosphate 1-dehydrogenase OS=Zea mays OX=4577 GN=100284317 PE=2 SV=1 - [B6TSB3_MAIZE]	57.5926	6.771	1.33508	0.0019708
A0A1D6LII9	Leucine-rich repeat (LRR) family protein	103629296	Leucine-rich repeat (LRR) family protein OS=Zea mays OX=4577 GN=103629296 PE=4 SV=1 - [A0A1D6LII9_MAIZE]	36.9476	5.26221	1.3348	0.0119661
K7VHA0	5-pentadecatrienyl resorcinol O-methyltransferase	103639000	5-pentadecatrienyl resorcinol O-methyltransferase OS=Zea mays OX=4577 GN=103639000 PE=3 SV=1 - [K7VHA0_MAIZE]	39.431	5.93506	1.32833	0.0178376
A0A1D6LXE3	Binding	ZEAMMB73_Zm00001d037377	Binding OS=Zea mays OX=4577 GN=ZEAMMB73_Zm00001d037377 PE=4 SV=1 - [A0A1D6LXE3_MAIZE]	133.306	5.73193	1.3251	0.0194715
A0A1D6M9R8	PLASMODESMATA CALLOSE-BINDING PROTEIN 2	100279409	PLASMODESMATA CALLOSE-BINDING PROTEIN 2 OS=Zea mays OX=4577 GN=100279409 PE=4 SV=1 - [A0A1D6M9R8_MAIZE]	11.7976	8.35303	1.32392	0.0121748
A0A1D6NCY7	Peptidase M28 family protein	100280279	Peptidase M28 family protein OS=Zea mays OX=4577 GN=100280279 PE=4 SV=1 - [A0A1D6NCY7_MAIZE]	78.5716	6.15088	1.32364	0.0427508
B4FA75	Uncharacterized protein		Uncharacterized protein OS=Zea mays OX=4577 PE=2 SV=1 - [B4FA75_MAIZE]	49.7911	7.29834	1.3204	0.0271397
B4G178	ADP,ATP carrier protein	ZEAMMB73_Zm00001d017857	ADP,ATP carrier protein OS=Zea mays OX=4577 GN=ZEAMMB73_Zm00001d017857 PE=2 SV=1 - [B4G178_MAIZE]	42.3648	9.84717	1.31961	0.00381324
B6SVS6	Asparaginyl-tRNA synthetase, cytoplasmic 3		Asparaginyl-tRNA synthetase, cytoplasmic 3 OS=Zea mays OX=4577 PE=2 SV=1 - [B6SVS6_MAIZE]	62.6253	5.96045	1.31918	0.00953839
B4FVX8	Dirigent protein	100285709	Dirigent protein OS=Zea mays OX=4577 GN=100285709 PE=2 SV=1 - [B4FVX8_MAIZE]	18.4145	7.13721	1.31763	0.00651355
A0A317YH60	Protein STRICTOSIDINE SYNTHASE-LIKE 3	SSL3_3	Protein STRICTOSIDINE SYNTHASE-LIKE 3 OS=Zea mays OX=4577 GN=SSL3_3 PE=4 SV=1 - [A0A317YH60_MAIZE]	44.1745	6.80029	1.3154	0.0447762
A0A1D6P548	Uncharacterized protein	ZEAMMB73_Zm00001d046828	Uncharacterized protein OS=Zea mays OX=4577 GN=ZEAMMB73_Zm00001d046828 PE=3 SV=1 - [A0A1D6P548_MAIZE]	27.0653	6.53662	1.31449	0.00834572
A0A1D6FQI8	Cation-transporting ATPase	ZEAMMB73_Zm00001d010324	Cation-transporting ATPase OS=Zea mays OX=4577 GN=ZEAMMB73_Zm00001d010324 PE=3 SV=1 - [A0A1D6FQI8_MAIZE]	102.883	7.32764	1.31445	0.0396534
B6TRL7	Uncharacterized protein		Uncharacterized protein OS=Zea mays OX=4577 PE=2 SV=1 - [B6TRL7_MAIZE]	15.8324	10.3452	1.31384	0.0275058
B6TAE7	Tropinone reductase	100282692	Tropinone reductase OS=Zea mays OX=4577 GN=100282692 PE=2 SV=1 - [B6TAE7_MAIZE]	29.0709	7.34229	1.31134	0.00308174
B4FUV5	AT-hook motif nuclear-localized protein 26	100273351	AT-hook motif nuclear-localized protein 26 OS=Zea mays OX=4577 GN=100273351 PE=2 SV=1 - [B4FUV5_MAIZE]	31.5298	6.52197	1.31131	0.0169583
A0A1D6H407	ADP-ribosylation factor GTPase-activating protein AGD12	100382772	ADP-ribosylation factor GTPase-activating protein AGD12 OS=Zea mays OX=4577 GN=100382772 PE=4 SV=1 - [A0A1D6H407_MAIZE]	33.9439	5.021	1.30979	0.00356614
A0A1D6QMX9	26S proteasome non-ATPase regulatory subunit 3 homolog A	ZEAMMB73_Zm00001d053232	26S proteasome non-ATPase regulatory subunit 3 homolog A OS=Zea mays OX=4577 GN=ZEAMMB73_Zm00001d053232 PE=4 SV=1 - [A0A1D6QMX9_MAIZE]	53.5638	7.79639	1.30942	0.00517509
B6T7Q7	Serine hydroxymethyltransferase		Serine hydroxymethyltransferase OS=Zea mays OX=4577 PE=2 SV=1 - [B6T7Q7_MAIZE]	56.4991	8.51416	1.30732	0.000719116
A0A1D6MM59	Uncharacterized protein	100382048	Uncharacterized protein OS=Zea mays OX=4577 GN=100382048 PE=4 SV=1 - [A0A1D6MM59_MAIZE]	62.9267	8.93896	1.30675	0.000106965
C0PCV6	Uncharacterized protein		Uncharacterized protein OS=Zea mays OX=4577 PE=2 SV=1 - [C0PCV6_MAIZE]	26.9861	4.42432	1.30473	0.016808
B4F9K0	Late embryogenesis abundant protein group 2	100191638	Late embryogenesis abundant protein group 2 OS=Zea mays OX=4577 GN=100191638 PE=2 SV=1 - [B4F9K0_MAIZE]	35.2522	5.10986	1.30451	0.00480599
B6SMB0	Cytochrome b-c1 complex subunit 6	ZEAMMB73_Zm00001d050696	Cytochrome b-c1 complex subunit 6 OS=Zea mays OX=4577 GN=ZEAMMB73_Zm00001d050696 PE=2 SV=1 - [B6SMB0_MAIZE]	8.29392	5.90967	1.30422	0.00294819
A0A1D6KTS3	Nucleolin 2	ZEAMMB73_Zm00001d032748	Nucleolin 2 OS=Zea mays OX=4577 GN=ZEAMMB73_Zm00001d032748 PE=4 SV=1 - [A0A1D6KTS3_MAIZE]	81.2333	5.03369	1.30277	0.000556836
A0A1D6H505	D-amino-acid transaminase chloroplastic	ZEAMMB73_Zm00001d016006	D-amino-acid transaminase chloroplastic OS=Zea mays OX=4577 GN=ZEAMMB73_Zm00001d016006 PE=4 SV=1 - [A0A1D6H505_MAIZE]	42.7356	7.12256	1.30179	0.0440335
B6TU01	Uncharacterized protein	100278693	Uncharacterized protein OS=Zea mays OX=4577 GN=100278693 PE=2 SV=1 - [B6TU01_MAIZE]	15.569	9.51025	1.30129	0.0129448
B8QV05	Chitinase	chiB	Chitinase OS=Zea mays subsp. parviglumis OX=76912 GN=chiB PE=4 SV=1 - [B8QV05_ZEAMP]	28.6016	8.54346	1.29923	0.0467378
A0A1D6KMV3	Transmembrane 9 superfamily member	103643205	Transmembrane 9 superfamily member OS=Zea mays OX=4577 GN=103643205 PE=3 SV=1 - [A0A1D6KMV3_MAIZE]	62.0698	6.45557	1.299	0.00304666
A0A1D6JYK5	Calcium pump2	ZEAMMB73_Zm00001d028687	Calcium pump2 OS=Zea mays OX=4577 GN=ZEAMMB73_Zm00001d028687 PE=3 SV=1 - [A0A1D6JYK5_MAIZE]	115.222	5.52881	1.29835	0.00485371
B4FG22	40S ribosomal protein S25-1	100193720	40S ribosomal protein S25-1 OS=Zea mays OX=4577 GN=100193720 PE=2 SV=1 - [B4FG22_MAIZE]	12.0146	10.5063	1.29785	0.00677395
A0A1D6ES19	Heat shock protein 90-2	103647533	Heat shock protein 90-2 OS=Zea mays OX=4577 GN=103647533 PE=3 SV=1 - [A0A1D6ES19_MAIZE]	80.1218	5.09717	1.29746	0.000902882
A1XCI0	Lipoxygenase	LOX5	Lipoxygenase OS=Zea mays OX=4577 GN=LOX5 PE=2 SV=1 - [A1XCI0_MAIZE]	100.294	6.84424	1.2972	0.0190463
B4F9X0	Alpha-galactosidase		Alpha-galactosidase OS=Zea mays OX=4577 PE=2 SV=1 - [B4F9X0_MAIZE]	45.1283	6.01123	1.29569	0.0100413
B4FU88	Peroxidase	100273283	Peroxidase OS=Zea mays OX=4577 GN=100273283 PE=2 SV=1 - [B4FU88_MAIZE]	38.2761	5.41455	1.2952	0.0193869
Q7SIC9	Transketolase, chloroplastic		Transketolase, chloroplastic OS=Zea mays OX=4577 PE=1 SV=1 - [TKTC_MAIZE]	72.9476	5.71924	1.29484	0.000361473
B4FRQ8	Spermidine hydroxycinnamoyl transferase	100279982	Spermidine hydroxycinnamoyl transferase OS=Zea mays OX=4577 GN=100279982 PE=2 SV=1 - [B4FRQ8_MAIZE]	46.5399	7.6792	1.29268	0.000234608
B6TGT0	60S ribosomal protein L2	RPL8_0	60S ribosomal protein L2 OS=Zea mays OX=4577 GN=RPL8_0 PE=2 SV=1 - [B6TGT0_MAIZE]	28.2019	11.0776	1.29099	0.00979224
C0HI04	Uncharacterized protein		Uncharacterized protein OS=Zea mays OX=4577 PE=2 SV=1 - [C0HI04_MAIZE]	66.4331	6.17627	1.29055	0.000821872
A0A1D6NSE2	Triacylglycerol lipase-like 1	ZEAMMB73_Zm00001d044947	Triacylglycerol lipase-like 1 OS=Zea mays OX=4577 GN=ZEAMMB73_Zm00001d044947 PE=4 SV=1 - [A0A1D6NSE2_MAIZE]	53.9594	7.66455	1.28973	0.0354739
B6SIQ7	40S ribosomal protein S20		40S ribosomal protein S20 OS=Zea mays OX=4577 PE=2 SV=1 - [B6SIQ7_MAIZE]	13.8835	9.46631	1.28887	0.0128279
A0A096SFU6	Lysine--tRNA ligase	100273907	Lysine--tRNA ligase OS=Zea mays OX=4577 GN=100273907 PE=3 SV=1 - [A0A096SFU6_MAIZE]	68.5584	6.20166	1.28722	0.00319575
A0A1D6LA47	Mitochondrial import inner membrane translocase subunit Tim10	100285900	Mitochondrial import inner membrane translocase subunit Tim10 OS=Zea mays OX=4577 GN=100285900 PE=4 SV=1 - [A0A1D6LA47_MAIZE]	8.29679	5.43994	1.28549	0.0312678
A3FMA4	Bowman-Birk type trypsin inhibitor	100037814	Bowman-Birk type trypsin inhibitor OS=Zea mays OX=4577 GN=100037814 PE=2 SV=1 - [A3FMA4_MAIZE]	10.3988	6.44287	1.28523	0.0102633
A0A1D6HSR3	Putative carboxylesterase 15	103631970	Putative carboxylesterase 15 OS=Zea mays OX=4577 GN=103631970 PE=4 SV=1 - [A0A1D6HSR3_MAIZE]	35.4049	6.18896	1.28469	0.033146
B4FS87	Glyceraldehyde-3-phosphate dehydrogenase	ZEAMMB73_Zm00001d035156	Glyceraldehyde-3-phosphate dehydrogenase OS=Zea mays OX=4577 GN=ZEAMMB73_Zm00001d035156 PE=2 SV=1 - [B4FS87_MAIZE]	36.5188	6.88818	1.28403	0.00732083
B4F925	Superoxide dismutase	542764	Superoxide dismutase OS=Zea mays OX=4577 GN=542764 PE=2 SV=1 - [B4F925_MAIZE]	25.5712	7.7085	1.28283	0.0355619
B6TYS6	Glutathione S-transferase zeta class		Glutathione S-transferase zeta class OS=Zea mays OX=4577 PE=2 SV=1 - [B6TYS6_MAIZE]	24.7397	6.11279	1.28152	0.0102322
B6UDP2	Signal peptidase complex subunit 3		Signal peptidase complex subunit 3 OS=Zea mays OX=4577 PE=2 SV=1 - [B6UDP2_MAIZE]	16.8684	9.02686	1.2809	0.010427
A0EJ90	COBRA-like protein	Bk2	COBRA-like protein OS=Zea mays OX=4577 GN=Bk2 PE=2 SV=1 - [A0EJ90_MAIZE]	49.2352	8.54346	1.27802	0.0166524
A0A1D6INM2	Exocyst complex component SEC8	ZEAMMB73_Zm00001d022502	Exocyst complex component SEC8 OS=Zea mays OX=4577 GN=ZEAMMB73_Zm00001d022502 PE=4 SV=1 - [A0A1D6INM2_MAIZE]	98.582	5.32568	1.27609	0.00904633
A0A1D6KJW0	Sulfite oxidase1	103642918	Sulfite oxidase1 OS=Zea mays OX=4577 GN=103642918 PE=4 SV=1 - [A0A1D6KJW0_MAIZE]	40.5418	8.26514	1.27554	0.00480754
A0A1D6HF06	Cationic amino acid transporter 9 chloroplastic	100285703	Cationic amino acid transporter 9 chloroplastic OS=Zea mays OX=4577 GN=100285703 PE=4 SV=1 - [A0A1D6HF06_MAIZE]	34.9726	8.93896	1.27513	0.00346436
B4G1P2	NADH dehydrogenase2	100285400	NADH dehydrogenase2 OS=Zea mays OX=4577 GN=100285400 PE=2 SV=1 - [B4G1P2_MAIZE]	21.927	9.37842	1.27489	0.0250532
A0A1D6N0A4	Pentatricopeptide repeat-containing protein chloroplastic	ZEAMMB73_Zm00001d041968	Pentatricopeptide repeat-containing protein chloroplastic OS=Zea mays OX=4577 GN=ZEAMMB73_Zm00001d041968 PE=4 SV=1 - [A0A1D6N0A4_MAIZE]	63.2517	7.44482	1.27485	0.0151562
A0A1D6H4X4	Uncharacterized protein	ZEAMMB73_Zm00001d015992	Uncharacterized protein OS=Zea mays OX=4577 GN=ZEAMMB73_Zm00001d015992 PE=3 SV=1 - [A0A1D6H4X4_MAIZE]	78.5614	9.12939	1.27295	0.00140373
A0A1D6L748	Aldehyde oxidase4	103644157	Aldehyde oxidase4 OS=Zea mays OX=4577 GN=103644157 PE=4 SV=1 - [A0A1D6L748_MAIZE]	146.308	6.15088	1.27191	0.00471154
B6SQH6	Import inner membrane translocase subunit Tim8	100282244	Import inner membrane translocase subunit Tim8 OS=Zea mays OX=4577 GN=100282244 PE=2 SV=1 - [B6SQH6_MAIZE]	8.22881	7.75244	1.27109	0.0310472
A0A1D6HXF7	Dehydrogenase/reductase SDR family member 2	ZEAMMB73_Zm00001d019439	Dehydrogenase/reductase SDR family member 2 OS=Zea mays OX=4577 GN=ZEAMMB73_Zm00001d019439 PE=4 SV=1 - [A0A1D6HXF7_MAIZE]	26.7642	8.25049	1.26988	0.00323451
A0A1D6HWM7	Calreticulin	542732	Calreticulin OS=Zea mays OX=4577 GN=542732 PE=3 SV=1 - [A0A1D6HWM7_MAIZE]	41.0993	4.99561	1.26861	0.00675483
B4FCK9	60S ribosomal protein L22-2	100192778	60S ribosomal protein L22-2 OS=Zea mays OX=4577 GN=100192778 PE=2 SV=1 - [B4FCK9_MAIZE]	14.4937	9.5542	1.26734	0.00155885
C0HFM6	Chaperonin CPN60-like 2 mitochondrial	100272259	Chaperonin CPN60-like 2 mitochondrial OS=Zea mays OX=4577 GN=100272259 PE=2 SV=1 - [C0HFM6_MAIZE]	61.2263	6.7417	1.26395	0.00941301
B4FVM1	Uncharacterized protein		Uncharacterized protein OS=Zea mays OX=4577 PE=2 SV=1 - [B4FVM1_MAIZE]	48.9568	6.55127	1.26327	0.00422864
C0P455	60S ribosomal protein L4-1	100382075	60S ribosomal protein L4-1 OS=Zea mays OX=4577 GN=100382075 PE=2 SV=1 - [C0P455_MAIZE]	44.2649	10.6382	1.26037	0.0280976
P80607	Probable UDP-arabinopyranose mutase 1	UPTG	Probable UDP-arabinopyranose mutase 1 OS=Zea mays OX=4577 GN=UPTG PE=1 SV=2 - [RGP1_MAIZE]	41.1776	6.12549	1.25943	0.00160267
P17847	Ferredoxin--nitrite reductase, chloroplastic (Fragment)	NIR	Ferredoxin--nitrite reductase, chloroplastic (Fragment) OS=Zea mays OX=4577 GN=NIR PE=2 SV=1 - [NIR_MAIZE]	63.3016	6.43018	1.25692	0.0234516
B6TIC7	Cysteine protease5	100283433	Cysteine protease5 OS=Zea mays OX=4577 GN=100283433 PE=2 SV=1 - [B6TIC7_MAIZE]	41.1478	5.26221	1.25559	0.00845933
A0A1D6EWI1	ATP synthase3	ZEAMMB73_Zm00001d006439	ATP synthase3 OS=Zea mays OX=4577 GN=ZEAMMB73_Zm00001d006439 PE=3 SV=1 - [A0A1D6EWI1_MAIZE]	21.3333	6.39209	1.25441	0.0174436
A0A1D6MQL8	DNA topoisomerase 2	100382343	DNA topoisomerase 2 OS=Zea mays OX=4577 GN=100382343 PE=3 SV=1 - [A0A1D6MQL8_MAIZE]	46.7074	7.43018	1.25419	0.0212791
K7VM84	Folylpolyglutamate synthase	ZEAMMB73_Zm00001d048514	Folylpolyglutamate synthase OS=Zea mays OX=4577 GN=ZEAMMB73_Zm00001d048514 PE=3 SV=1 - [K7VM84_MAIZE]	63.5596	7.48877	1.25382	0.0303112
B6SLK4	Elongation factor 1-beta 2	ZEAMMB73_Zm00001d022513	Elongation factor 1-beta 2 OS=Zea mays OX=4577 GN=ZEAMMB73_Zm00001d022513 PE=2 SV=1 - [B6SLK4_MAIZE]	23.3927	4.71631	1.25364	0.0481163
B6UET4	Uncharacterized protein		Uncharacterized protein OS=Zea mays OX=4577 PE=2 SV=1 - [B6UET4_MAIZE]	11.8892	5.2876	1.25303	0.00549321
B4F8P0	Eukaryotic aspartyl protease family protein	100191400	Eukaryotic aspartyl protease family protein OS=Zea mays OX=4577 GN=100191400 PE=2 SV=1 - [B4F8P0_MAIZE]	46.6155	8.90967	1.25274	0.0145465
B4FBF4	Serine hydroxymethyltransferase		Serine hydroxymethyltransferase OS=Zea mays OX=4577 PE=2 SV=1 - [B4FBF4_MAIZE]	51.5711	7.26904	1.25253	0.0267264
A0A1D6E0R1	Clathrin interactor EPSIN 1	100501876	Clathrin interactor EPSIN 1 OS=Zea mays OX=4577 GN=100501876 PE=4 SV=1 - [A0A1D6E0R1_MAIZE]	56.2366	5.31299	1.25161	0.0205527
A0A1D6HFY2	Pentatricopeptide (PPR) repeat-containing protein-like	ZEAMMB73_Zm00001d017607	Pentatricopeptide (PPR) repeat-containing protein-like OS=Zea mays OX=4577 GN=ZEAMMB73_Zm00001d017607 PE=3 SV=1 - [A0A1D6HFY2_MAIZE]	47.567	8.01611	1.25036	0.0147263
B6T329	Endonuclease 2	100282067	Endonuclease 2 OS=Zea mays OX=4577 GN=100282067 PE=2 SV=1 - [B6T329_MAIZE]	32.2707	5.74463	1.24945	0.00307005
B4FQE6	Uncharacterized protein		Uncharacterized protein OS=Zea mays OX=4577 PE=2 SV=1 - [B4FQE6_MAIZE]	34.439	8.57275	1.24913	0.0451381
A0A1D6KTS5	Nucleolin 2	ZEAMMB73_Zm00001d032748	Nucleolin 2 OS=Zea mays OX=4577 GN=ZEAMMB73_Zm00001d032748 PE=4 SV=1 - [A0A1D6KTS5_MAIZE]	20.5379	9.72998	1.24847	0.00868963
A0A1D6KYH6	Serine/threonine protein phosphatase 2A 57 kDa regulatory subunit B' beta isoform	100280472	Serine/threonine protein phosphatase 2A 57 kDa regulatory subunit B' beta isoform OS=Zea mays OX=4577 GN=100280472 PE=4 SV=1 - [A0A1D6KYH6_MAIZE]	29.8795	7.23975	1.24811	0.00376485
B7ZZ42	Heat shock 70 kDa protein 3	103650526	Heat shock 70 kDa protein 3 OS=Zea mays OX=4577 GN=103650526 PE=2 SV=1 - [B7ZZ42_MAIZE]	71.1182	5.22412	1.24701	0.000662626
A0A1D6J5I4	Fatty acid biosynthesis1	100273168	Fatty acid biosynthesis1 OS=Zea mays OX=4577 GN=100273168 PE=4 SV=1 - [A0A1D6J5I4_MAIZE]	20.2075	9.29053	1.2465	0.00422224
Q53WW9	Beta-D-glucosidase	glu1	Beta-D-glucosidase OS=Zea mays OX=4577 GN=glu1 PE=2 SV=1 - [Q53WW9_MAIZE]	64.1965	6.69775	1.24514	0.00105611
A0A1D6G8L3	Triose phosphate isomerase5	100280823	Triose phosphate isomerase5 OS=Zea mays OX=4577 GN=100280823 PE=3 SV=1 - [A0A1D6G8L3_MAIZE]	24.6428	6.34131	1.24272	0.0362823
B6SLA5	2Fe-2S ferredoxin-like superfamily protein	100284188	2Fe-2S ferredoxin-like superfamily protein OS=Zea mays OX=4577 GN=100284188 PE=2 SV=1 - [B6SLA5_MAIZE]	17.1121	7.84033	1.24199	0.00055962
B4FR32	Glyceraldehyde-3-phosphate deHaseN1	542583	Glyceraldehyde-3-phosphate deHaseN1 OS=Zea mays OX=4577 GN=542583 PE=2 SV=1 - [B4FR32_MAIZE]	53.2505	7.1958	1.24153	0.000715771
A0A1D6F519	Ascorbate peroxidase2	542476	Ascorbate peroxidase2 OS=Zea mays OX=4577 GN=542476 PE=3 SV=1 - [A0A1D6F519_MAIZE]	25.766	5.35107	1.24134	0.014402
A0A1D6LMW9	Endoplasmin-like protein	ZEAMMB73_Zm00001d036401	Endoplasmin-like protein OS=Zea mays OX=4577 GN=ZEAMMB73_Zm00001d036401 PE=3 SV=1 - [A0A1D6LMW9_MAIZE]	92.515	5.03369	1.24058	0.0435127
A0A1X7YI05	Uncharacterized protein		Uncharacterized protein OS=Zea mays OX=4577 PE=4 SV=1 - [A0A1X7YI05_MAIZE]	23.7751	9.34912	1.23978	0.0230848
B4FHJ2	Xylose isomerase	100194128	Xylose isomerase OS=Zea mays OX=4577 GN=100194128 PE=2 SV=1 - [B4FHJ2_MAIZE]	53.9529	5.65576	1.23853	0.0427616
K7UGM3	Catalase	ZEAMMB73_Zm00001d054044	Catalase OS=Zea mays OX=4577 GN=ZEAMMB73_Zm00001d054044 PE=3 SV=1 - [K7UGM3_MAIZE]	56.5421	6.96143	1.23713	0.0308556
A0A1R3MB28	Malate dehydrogenase	MDHC_0	Malate dehydrogenase OS=Zea mays OX=4577 GN=MDHC_0 PE=3 SV=1 - [A0A1R3MB28_MAIZE]	35.5671	6.0874	1.23623	0.00322702
C4J9S6	Uncharacterized protein		Uncharacterized protein OS=Zea mays OX=4577 PE=2 SV=1 - [C4J9S6_MAIZE]	26.4252	5.78271	1.23548	0.0225566
B4FWP0	Fructose-bisphosphate aldolase	100272913	Fructose-bisphosphate aldolase OS=Zea mays OX=4577 GN=100272913 PE=2 SV=1 - [B4FWP0_MAIZE]	38.4349	7.29834	1.23516	0.0274948
A0A1D6JS29	Outer mitochondrial membrane protein porin	ZEAMMB73_Zm00001d028102	Outer mitochondrial membrane protein porin OS=Zea mays OX=4577 GN=ZEAMMB73_Zm00001d028102 PE=4 SV=1 - [A0A1D6JS29_MAIZE]	22.9583	9.36377	1.23511	0.025108
A0A1D6JI62	Stem-specific protein TSJT1	ZEAMMB73_Zm00001d026632	Stem-specific protein TSJT1 OS=Zea mays OX=4577 GN=ZEAMMB73_Zm00001d026632 PE=4 SV=1 - [A0A1D6JI62_MAIZE]	27.9137	7.69385	1.23466	0.027023
A0A1D6MED5	Structural maintenance of chromosomes protein 3	ZEAMMB73_Zm00001d039189	Structural maintenance of chromosomes protein 3 OS=Zea mays OX=4577 GN=ZEAMMB73_Zm00001d039189 PE=4 SV=1 - [A0A1D6MED5_MAIZE]	125.522	7.6499	1.23415	0.009045
C0PHP7	Uncharacterized protein		Uncharacterized protein OS=Zea mays OX=4577 PE=2 SV=1 - [C0PHP7_MAIZE]	48.3198	6.78564	1.23362	0.00991979
B6T3L4	Ribosomal protein L9, N-terminal domain containing protein		Ribosomal protein L9, N-terminal domain containing protein OS=Zea mays OX=4577 PE=2 SV=1 - [B6T3L4_MAIZE]	23.2847	9.94971	1.23332	0.00767283
A0A1D6HAH4	Phosphoinositide phosphatase SAC6	100501806	Phosphoinositide phosphatase SAC6 OS=Zea mays OX=4577 GN=100501806 PE=4 SV=1 - [A0A1D6HAH4_MAIZE]	54.4709	8.96826	1.23283	0.00147779
B6T6P7	UBA and UBX domain-containing protein		UBA and UBX domain-containing protein OS=Zea mays OX=4577 PE=2 SV=1 - [B6T6P7_MAIZE]	33.1984	5.93506	1.23167	0.00341994
B6TV55	Stem 28 kDa glycoprotein	100284565	Stem 28 kDa glycoprotein OS=Zea mays OX=4577 GN=100284565 PE=2 SV=1 - [B6TV55_MAIZE]	32.0697	9.12939	1.23075	0.0155162
B4FX42	Glycolipid transfer protein 1	100283524	Glycolipid transfer protein 1 OS=Zea mays OX=4577 GN=100283524 PE=2 SV=2 - [B4FX42_MAIZE]	22.5293	7.00537	1.22958	0.0193343
A0A317YC87	Uncharacterized protein	Zm00014a_041654	Uncharacterized protein OS=Zea mays OX=4577 GN=Zm00014a_041654 PE=4 SV=1 - [A0A317YC87_MAIZE]	17.1556	4.34814	1.22831	0.00724018
B4FT76	ABC transporter I family member 6 chloroplastic	100273146	ABC transporter I family member 6 chloroplastic OS=Zea mays OX=4577 GN=100273146 PE=2 SV=1 - [B4FT76_MAIZE]	32.3408	5.66846	1.22684	0.0374801
A0A1D6EY66	Elongation factor 1-alpha	ZEAMMB73_Zm00001d006596	Elongation factor 1-alpha OS=Zea mays OX=4577 GN=ZEAMMB73_Zm00001d006596 PE=3 SV=1 - [A0A1D6EY66_MAIZE]	49.2366	9.0708	1.22612	0.000670997
B4FYT3	Peptidyl-prolyl cis-trans isomerase		Peptidyl-prolyl cis-trans isomerase OS=Zea mays OX=4577 PE=2 SV=1 - [B4FYT3_MAIZE]	11.2776	5.89697	1.2256	0.0101966
A0A1D6G651	Stearoyl-acyl-carrier-protein desaturase2	100192652	Stearoyl-acyl-carrier-protein desaturase2 OS=Zea mays OX=4577 GN=100192652 PE=4 SV=1 - [A0A1D6G651_MAIZE]	38.048	5.61768	1.22533	0.0267571
A0A1D6QVG7	Protein disulfide isomerase3	606411	Protein disulfide isomerase3 OS=Zea mays OX=4577 GN=606411 PE=4 SV=1 - [A0A1D6QVG7_MAIZE]	50.9311	5.36377	1.22448	0.0100886
B4FDG9	Sucrose-phosphatase 1	541868	Sucrose-phosphatase 1 OS=Zea mays OX=4577 GN=541868 PE=2 SV=1 - [B4FDG9_MAIZE]	39.4661	6.20166	1.2232	0.00646563
B4FAF5	Outer envelope protein 80 chloroplastic	100191859	Outer envelope protein 80 chloroplastic OS=Zea mays OX=4577 GN=100191859 PE=2 SV=1 - [B4FAF5_MAIZE]	70.7352	8.17725	1.22284	0.00218391
C0PN73	Uncharacterized protein		Uncharacterized protein OS=Zea mays OX=4577 PE=2 SV=1 - [C0PN73_MAIZE]	8.15235	11.0337	1.2227	0.00442714
C0PFD1	1-(5-phosphoribosyl)-5-[(5-phosphoribosylamino)methylideneamino] imidazole-4-carboxamide isomerase, chloroplastic	ZEAMMB73_Zm00001d029548	1-(5-phosphoribosyl)-5-[(5-phosphoribosylamino)methylideneamino] imidazole-4-carboxamide isomerase, chloroplastic OS=Zea mays OX=4577 GN=ZEAMMB73_Zm00001d029548 PE=2 SV=1 - [C0PFD1_MAIZE]	34.0454	6.72705	1.21995	0.0146036
A0A1D6KJI4	Pyridoxamine 5'-phosphate oxidase family protein	100193760	Pyridoxamine 5'-phosphate oxidase family protein OS=Zea mays OX=4577 GN=100193760 PE=4 SV=1 - [A0A1D6KJI4_MAIZE]	39.1311	8.73389	1.21824	0.0298925
B8A1M2	Uncharacterized protein		Uncharacterized protein OS=Zea mays OX=4577 PE=2 SV=1 - [B8A1M2_MAIZE]	15.0636	5.22412	1.21815	0.0109556
A0A1D6LPA4	Glycosyltransferases	103629620	Glycosyltransferases OS=Zea mays OX=4577 GN=103629620 PE=3 SV=1 - [A0A1D6LPA4_MAIZE]	57.8075	8.20654	1.21783	0.028315
K7UC18	Ribosomal protein L19 family protein	100381882	Ribosomal protein L19 family protein OS=Zea mays OX=4577 GN=100381882 PE=4 SV=1 - [K7UC18_MAIZE]	9.51847	11.6343	1.21769	0.0139105
A0A317Y3E8	Alanine--glyoxylate aminotransferase 2 3, mitochondrial	At3g08860_2	Alanine--glyoxylate aminotransferase 2 3, mitochondrial OS=Zea mays OX=4577 GN=At3g08860_2 PE=3 SV=1 - [A0A317Y3E8_MAIZE]	50.8659	7.2251	1.21638	0.0269276
C4JBZ8	Uncharacterized protein		Uncharacterized protein OS=Zea mays OX=4577 PE=2 SV=1 - [C4JBZ8_MAIZE]	13.7977	4.88135	1.21473	0.00682478
B6T4W5	Hyoscyamine 6-dioxygenase		Hyoscyamine 6-dioxygenase OS=Zea mays OX=4577 PE=2 SV=1 - [B6T4W5_MAIZE]	37.7042	5.87158	1.21461	0.0125204
B6TII5	Pyruvate kinase		Pyruvate kinase OS=Zea mays OX=4577 PE=2 SV=1 - [B6TII5_MAIZE]	55.281	8.06006	1.21358	0.0219061
A0A1D6E703	Eukaryotic translation initiation factor isoform 4G-2	103646262	Eukaryotic translation initiation factor isoform 4G-2 OS=Zea mays OX=4577 GN=103646262 PE=4 SV=1 - [A0A1D6E703_MAIZE]	86.4099	8.19189	1.21083	0.0129454
A0A1D6QGW9	Long chain acyl-CoA synthetase 8	ZEAMMB73_Zm00001d052399	Long chain acyl-CoA synthetase 8 OS=Zea mays OX=4577 GN=ZEAMMB73_Zm00001d052399 PE=4 SV=1 - [A0A1D6QGW9_MAIZE]	64.2305	6.90283	1.21022	0.0102745
C0P648	Uncharacterized protein		Uncharacterized protein OS=Zea mays OX=4577 PE=2 SV=1 - [C0P648_MAIZE]	32.3969	5.21143	1.20991	0.0294451
A0A1D6I0N4	Auxin transport protein BIG	ZEAMMB73_Zm00001d019881	Auxin transport protein BIG OS=Zea mays OX=4577 GN=ZEAMMB73_Zm00001d019881 PE=4 SV=1 - [A0A1D6I0N4_MAIZE]	549.345	6.21436	1.20987	0.0237432
A0A1D6GLG4	Serine/threonine-protein phosphatase	ZEAMMB73_Zm00001d013680	Serine/threonine-protein phosphatase OS=Zea mays OX=4577 GN=ZEAMMB73_Zm00001d013680 PE=3 SV=1 - [A0A1D6GLG4_MAIZE]	99.8463	5.99854	1.20856	0.000967067
A0A1D6NUP0	Protein disulfide isomerase5	ZEAMMB73_Zm00001d045218	Protein disulfide isomerase5 OS=Zea mays OX=4577 GN=ZEAMMB73_Zm00001d045218 PE=4 SV=1 - [A0A1D6NUP0_MAIZE]	30.4517	5.12256	1.20824	0.0352052
A0A1D6L977	Methylenetetrahydrofolate reductase	541794	Methylenetetrahydrofolate reductase OS=Zea mays OX=4577 GN=541794 PE=3 SV=1 - [A0A1D6L977_MAIZE]	64.2444	6.01123	1.20789	0.0036143
A0A1D6N521	Lipoxygenase	100037802	Lipoxygenase OS=Zea mays OX=4577 GN=100037802 PE=3 SV=1 - [A0A1D6N521_MAIZE]	98.2771	6.69775	1.20694	0.0083854
A0A1D6FLQ1	Putative casein kinase family protein	103635432	Putative casein kinase family protein OS=Zea mays OX=4577 GN=103635432 PE=4 SV=1 - [A0A1D6FLQ1_MAIZE]	42.1357	9.67139	1.20284	0.00542368
A0A1D6LGU3	IQ-domain 3	100274440	IQ-domain 3 OS=Zea mays OX=4577 GN=100274440 PE=4 SV=1 - [A0A1D6LGU3_MAIZE]	51.1235	10.3452	1.20218	0.0173019
A0A1D6P237	Plant L-ascorbate oxidase	100273169	Plant L-ascorbate oxidase OS=Zea mays OX=4577 GN=100273169 PE=3 SV=1 - [A0A1D6P237_MAIZE]	42.5585	7.35693	1.20149	0.0306162
B6U773	40S ribosomal protein S15a		40S ribosomal protein S15a OS=Zea mays OX=4577 PE=2 SV=1 - [B6U773_MAIZE]	14.942	10.1108	1.20057	0.0339646
B4G024	Malate dehydrogenase		Malate dehydrogenase OS=Zea mays OX=4577 PE=2 SV=1 - [B4G024_MAIZE]	36.4762	8.104	1.20051	0.0281168
B4FGP0	Uncharacterized protein		Uncharacterized protein OS=Zea mays OX=4577 PE=2 SV=1 - [B4FGP0_MAIZE]	30.2593	5.70654	0.833298	0.00525802
B4FR89	Phosphomannomutase	100272867	Phosphomannomutase OS=Zea mays OX=4577 GN=100272867 PE=2 SV=1 - [B4FR89_MAIZE]	28.1122	6.22705	0.832758	0.0481943
B7ZYR5	Uncharacterized protein		Uncharacterized protein OS=Zea mays OX=4577 PE=2 SV=1 - [B7ZYR5_MAIZE]	70.1987	7.75244	0.832458	0.00459259
A0A1D6EPK9	Annexin	100283225	Annexin OS=Zea mays OX=4577 GN=100283225 PE=3 SV=1 - [A0A1D6EPK9_MAIZE]	33.9305	8.89502	0.832363	7.07271e-05
B6TK02	Expp1 protein	100283623	Expp1 protein OS=Zea mays OX=4577 GN=100283623 PE=2 SV=1 - [B6TK02_MAIZE]	25.7206	7.88428	0.831907	0.000274641
B6UAL5	Cytokinin riboside 5'-monophosphate phosphoribohydrolase		Cytokinin riboside 5'-monophosphate phosphoribohydrolase OS=Zea mays OX=4577 PE=2 SV=1 - [B6UAL5_MAIZE]	24.5242	5.41455	0.831688	0.0453485
B4FN21	Proteasome subunit beta	100283981	Proteasome subunit beta OS=Zea mays OX=4577 GN=100283981 PE=2 SV=1 - [B4FN21_MAIZE]	28.8494	7.98682	0.831672	0.0413728
B6T9E6	Polygalacturonase		Polygalacturonase OS=Zea mays OX=4577 PE=2 SV=1 - [B6T9E6_MAIZE]	48.9954	5.68115	0.831441	0.000809336
A0A1D6F267	Peroxidase	103647881	Peroxidase OS=Zea mays OX=4577 GN=103647881 PE=3 SV=1 - [A0A1D6F267_MAIZE]	40.3851	7.76709	0.830665	0.0250577
A0A1D6H7X5	PREFOLDIN 1	ZEAMMB73_Zm00001d016458	PREFOLDIN 1 OS=Zea mays OX=4577 GN=ZEAMMB73_Zm00001d016458 PE=4 SV=1 - [A0A1D6H7X5_MAIZE]	14.8625	5.05908	0.828919	0.0480573
A0A1D6NDZ5	Putative choline kinase 2	ZEAMMB73_Zm00001d043652	Putative choline kinase 2 OS=Zea mays OX=4577 GN=ZEAMMB73_Zm00001d043652 PE=4 SV=1 - [A0A1D6NDZ5_MAIZE]	29.1633	5.21143	0.828784	0.00244172
B4FCQ4	Cytochrome c oxidase subunit 6b-1	ZEAMMB73_Zm00001d029393	Cytochrome c oxidase subunit 6b-1 OS=Zea mays OX=4577 GN=ZEAMMB73_Zm00001d029393 PE=2 SV=1 - [B4FCQ4_MAIZE]	19.0057	4.29736	0.828336	0.00809713
A0A1D6HBS0	Ras-related protein RABB1a	100217047	Ras-related protein RABB1a OS=Zea mays OX=4577 GN=100217047 PE=4 SV=1 - [A0A1D6HBS0_MAIZE]	15.7119	6.94678	0.828102	0.0358103
B6TQC0	3-N-debenzoyl-2-deoxytaxol N-benzoyltransferase	100284134	3-N-debenzoyl-2-deoxytaxol N-benzoyltransferase OS=Zea mays OX=4577 GN=100284134 PE=2 SV=1 - [B6TQC0_MAIZE]	46.0705	5.24951	0.827903	0.0326253
B6TG90	Methionine aminopeptidase		Methionine aminopeptidase OS=Zea mays OX=4577 PE=2 SV=1 - [B6TG90_MAIZE]	43.4799	7.53271	0.825937	0.0256682
B4FUI0	Uncharacterized protein		Uncharacterized protein OS=Zea mays OX=4577 PE=2 SV=1 - [B4FUI0_MAIZE]	44.4819	8.99756	0.825857	0.00628102
B4F935	Uncharacterized protein		Uncharacterized protein OS=Zea mays OX=4577 PE=2 SV=1 - [B4F935_MAIZE]	52.2485	7.04932	0.823914	0.0111751
A0A1D6DTL5	Putative acyl-activating enzyme 5 peroxisomal	103645766	Putative acyl-activating enzyme 5 peroxisomal OS=Zea mays OX=4577 GN=103645766 PE=4 SV=1 - [A0A1D6DTL5_MAIZE]	60.0904	7.34229	0.82383	0.0142351
C4IYE9	Uncharacterized protein		Uncharacterized protein OS=Zea mays OX=4577 PE=2 SV=1 - [C4IYE9_MAIZE]	24.4893	8.01611	0.822613	0.00336083
A0A1D6PT07	DNA replication licensing factor MCM2	ZEAMMB73_Zm00001d049190	DNA replication licensing factor MCM2 OS=Zea mays OX=4577 GN=ZEAMMB73_Zm00001d049190 PE=3 SV=1 - [A0A1D6PT07_MAIZE]	73.358	7.57666	0.821265	0.0267705
A0A1D6III9	NAD(P)-binding Rossmann-fold superfamily protein	ZEAMMB73_Zm00001d022009	NAD(P)-binding Rossmann-fold superfamily protein OS=Zea mays OX=4577 GN=ZEAMMB73_Zm00001d022009 PE=4 SV=1 - [A0A1D6III9_MAIZE]	31.1354	9.34912	0.820982	0.0300442
A0A1D6GEN7	NAD(P)-binding Rossmann-fold superfamily protein	100280114	NAD(P)-binding Rossmann-fold superfamily protein OS=Zea mays OX=4577 GN=100280114 PE=4 SV=1 - [A0A1D6GEN7_MAIZE]	28.4104	7.63525	0.820345	0.0405122
A0A1D6LEU8	Pre-mRNA-splicing factor SLU7-A	103629005	Pre-mRNA-splicing factor SLU7-A OS=Zea mays OX=4577 GN=103629005 PE=4 SV=1 - [A0A1D6LEU8_MAIZE]	23.3792	6.78564	0.820191	0.0299572
A0A1D6N2E5	Retrovirus-related Pol polyprotein LINE-1	100192760	Retrovirus-related Pol polyprotein LINE-1 OS=Zea mays OX=4577 GN=100192760 PE=4 SV=1 - [A0A1D6N2E5_MAIZE]	60.6538	6.07471	0.820101	0.00634158
B4FLD5	Uncharacterized protein		Uncharacterized protein OS=Zea mays OX=4577 PE=2 SV=1 - [B4FLD5_MAIZE]	43.3027	5.96045	0.819771	0.00692056
B6T7H0	Glutathione S-transferase 6	GSTF8_3	Glutathione S-transferase 6 OS=Zea mays OX=4577 GN=GSTF8_3 PE=2 SV=1 - [B6T7H0_MAIZE]	25.7703	7.56201	0.81932	0.0206976
A0A1D6KYW8	Deoxyuridine 5'-triphosphate nucleotidohydrolase	ZEAMMB73_Zm00001d033421	Deoxyuridine 5'-triphosphate nucleotidohydrolase OS=Zea mays OX=4577 GN=ZEAMMB73_Zm00001d033421 PE=4 SV=1 - [A0A1D6KYW8_MAIZE]	22.9202	7.04932	0.817804	0.00986228
A0A1D6QGA0	Meristematic receptor-like kinase	100281413	Meristematic receptor-like kinase OS=Zea mays OX=4577 GN=100281413 PE=4 SV=1 - [A0A1D6QGA0_MAIZE]	67.1094	9.59814	0.817655	0.01698
A0A1D6MC44	ARM repeat superfamily protein	ZEAMMB73_Zm00001d038970	ARM repeat superfamily protein OS=Zea mays OX=4577 GN=ZEAMMB73_Zm00001d038970 PE=4 SV=1 - [A0A1D6MC44_MAIZE]	57.134	5.89697	0.817324	0.00390092
A0A1D6GMZ8	SH3 domain-containing protein 2	100272839	SH3 domain-containing protein 2 OS=Zea mays OX=4577 GN=100272839 PE=4 SV=1 - [A0A1D6GMZ8_MAIZE]	38.5155	6.30322	0.817178	0.0100055
B4FWY4	GDSL esterase/lipase	100273681	GDSL esterase/lipase OS=Zea mays OX=4577 GN=100273681 PE=2 SV=1 - [B4FWY4_MAIZE]	41.176	8.27979	0.816784	0.016905
B6T4T1	Peroxisome biogenesis protein 22	100276098	Peroxisome biogenesis protein 22 OS=Zea mays OX=4577 GN=100276098 PE=2 SV=1 - [B6T4T1_MAIZE]	31.7285	7.47412	0.816562	0.00325778
B6TME5	Aminotransferase, class IV family protein		Aminotransferase, class IV family protein OS=Zea mays OX=4577 PE=2 SV=1 - [B6TME5_MAIZE]	62.2692	6.85889	0.816192	0.0276463
A0A1D6IKI4	VH1-interacting kinase	100382164	VH1-interacting kinase OS=Zea mays OX=4577 GN=100382164 PE=3 SV=1 - [A0A1D6IKI4_MAIZE]	49.0743	7.23975	0.81612	0.0222934
B4FC92	Nuclear transport factor 2	100192679	Nuclear transport factor 2 OS=Zea mays OX=4577 GN=100192679 PE=2 SV=1 - [B4FC92_MAIZE]	13.5566	6.12549	0.815262	0.00171041
A0A1D6LHU9	Pumilio homolog 3	100384506	Pumilio homolog 3 OS=Zea mays OX=4577 GN=100384506 PE=4 SV=1 - [A0A1D6LHU9_MAIZE]	26.2893	6.82959	0.814503	0.0116746
B7ZZ09	Uncharacterized protein		Uncharacterized protein OS=Zea mays OX=4577 PE=2 SV=1 - [B7ZZ09_MAIZE]	21.1004	11.2095	0.814365	0.0167735
A0A1D6PYJ2	Thiaminase1	103653246	Thiaminase1 OS=Zea mays OX=4577 GN=103653246 PE=4 SV=1 - [A0A1D6PYJ2_MAIZE]	41.6112	4.95752	0.814242	0.0186767
B8A2X5	Pectinesterase	100280285	Pectinesterase OS=Zea mays OX=4577 GN=100280285 PE=2 SV=1 - [B8A2X5_MAIZE]	60.0563	8.54346	0.814126	0.0439871
B4FW32	DnaJ subfamily C member 7	ZEAMMB73_Zm00001d011767	DnaJ subfamily C member 7 OS=Zea mays OX=4577 GN=ZEAMMB73_Zm00001d011767 PE=2 SV=1 - [B4FW32_MAIZE]	52.545	7.81104	0.812045	0.00688714
A0A1D6MDW9	26S proteasome regulatory subunit RPN13	100281651	26S proteasome regulatory subunit RPN13 OS=Zea mays OX=4577 GN=100281651 PE=4 SV=1 - [A0A1D6MDW9_MAIZE]	32.5881	4.4751	0.810311	0.0193465
B6SHU5	Fasciclin-like arabinogalactan protein 7	100281475	Fasciclin-like arabinogalactan protein 7 OS=Zea mays OX=4577 GN=100281475 PE=2 SV=1 - [B6SHU5_MAIZE]	28.1789	9.30518	0.80988	0.00778128
B6T7N8	ATP10 protein expressed	100282465	ATP10 protein expressed OS=Zea mays OX=4577 GN=100282465 PE=2 SV=1 - [B6T7N8_MAIZE]	28.948	8.89502	0.809514	0.0421464
A0A1D6HK91	Protein tyrosine kinase family protein	ZEAMMB73_Zm00001d018025	Protein tyrosine kinase family protein OS=Zea mays OX=4577 GN=ZEAMMB73_Zm00001d018025 PE=4 SV=1 - [A0A1D6HK91_MAIZE]	110.016	6.06201	0.809382	0.00659122
B4FE06	Uncharacterized protein		Uncharacterized protein OS=Zea mays OX=4577 PE=2 SV=1 - [B4FE06_MAIZE]	24.0342	6.01123	0.809323	0.0178057
B6TTW1	Cyanate hydratase	CYN	Cyanate hydratase OS=Zea mays OX=4577 GN=CYN PE=2 SV=1 - [CYNS_MAIZE]	18.5144	5.87158	0.809315	0.0499981
B6TLX2	Fiber protein Fb15	100283793	Fiber protein Fb15 OS=Zea mays OX=4577 GN=100283793 PE=2 SV=1 - [B6TLX2_MAIZE]	10.6474	8.1626	0.808909	0.00106023
A0A1D6Q5M4	Proteasome endopeptidase complex	103653823	Proteasome endopeptidase complex OS=Zea mays OX=4577 GN=103653823 PE=3 SV=1 - [A0A1D6Q5M4_MAIZE]	17.836	5.38916	0.808036	0.00654525
A0A1D6FNP0	Lysophospholipid acyltransferase LPEAT1	ZEAMMB73_Zm00001d010026	Lysophospholipid acyltransferase LPEAT1 OS=Zea mays OX=4577 GN=ZEAMMB73_Zm00001d010026 PE=4 SV=1 - [A0A1D6FNP0_MAIZE]	42.8529	7.69385	0.808014	0.00492043
A0A1D6MPT4	H/ACA ribonucleoprotein complex subunit 4	103649956	H/ACA ribonucleoprotein complex subunit 4 OS=Zea mays OX=4577 GN=103649956 PE=4 SV=1 - [A0A1D6MPT4_MAIZE]	63.7606	9.11475	0.806546	0.00277627
C0P9T2	SEC12-like protein 1	100382688	SEC12-like protein 1 OS=Zea mays OX=4577 GN=100382688 PE=2 SV=1 - [C0P9T2_MAIZE]	43.2831	7.18115	0.806282	0.0129125
B4FS82	Uncharacterized protein		Uncharacterized protein OS=Zea mays OX=4577 PE=2 SV=1 - [B4FS82_MAIZE]	20.1931	8.1333	0.806001	0.0477851
B6TXM6	10-deacetylbaccatin III 10-O-acetyltransferase	100284805	10-deacetylbaccatin III 10-O-acetyltransferase OS=Zea mays OX=4577 GN=100284805 PE=2 SV=1 - [B6TXM6_MAIZE]	45.4552	5.18604	0.803689	0.000963202
B4FPX0	26S proteasome non-ATPase regulatory subunit 9		26S proteasome non-ATPase regulatory subunit 9 OS=Zea mays OX=4577 PE=2 SV=1 - [B4FPX0_MAIZE]	23.1377	5.22412	0.803207	0.0427909
B4FKQ7	UDP-galactose/UDP-glucose transporter 3	100216965	UDP-galactose/UDP-glucose transporter 3 OS=Zea mays OX=4577 GN=100216965 PE=2 SV=1 - [B4FKQ7_MAIZE]	39.9567	9.80322	0.802695	0.0464324
B6SMV8	Uncharacterized protein	100276306	Uncharacterized protein OS=Zea mays OX=4577 GN=100276306 PE=2 SV=1 - [B6SMV8_MAIZE]	10.7854	8.51416	0.802436	0.00883357
A0A1D6F513	Phosphoinositide phospholipase C	ZEAMMB73_Zm00001d007229	Phosphoinositide phospholipase C OS=Zea mays OX=4577 GN=ZEAMMB73_Zm00001d007229 PE=4 SV=1 - [A0A1D6F513_MAIZE]	66.9321	6.94678	0.801307	0.000178393
A0A1D6M4H7	Guanosine nucleotide diphosphate dissociation inhibitor	103630368	Guanosine nucleotide diphosphate dissociation inhibitor OS=Zea mays OX=4577 GN=103630368 PE=3 SV=1 - [A0A1D6M4H7_MAIZE]	46.7765	6.80029	0.800921	0.00139497
B4FVN5	Uncharacterized protein		Uncharacterized protein OS=Zea mays OX=4577 PE=2 SV=1 - [B4FVN5_MAIZE]	37.2549	6.59521	0.800831	0.0152853
C4J6T2	Exocyst subunit Exo70 family protein		Exocyst subunit Exo70 family protein OS=Zea mays OX=4577 PE=2 SV=1 - [C4J6T2_MAIZE]	71.0984	7.6792	0.800813	1.62974e-05
C4P9N2	Nucleoside diphosphate kinase II (Fragment)		Nucleoside diphosphate kinase II (Fragment) OS=Zea mays OX=4577 PE=2 SV=1 - [C4P9N2_MAIZE]	12.3876	9.1001	0.800372	0.0298658
B6SPZ8	VAMP-like protein YKT62		VAMP-like protein YKT62 OS=Zea mays OX=4577 PE=2 SV=1 - [B6SPZ8_MAIZE]	23.1767	7.91357	0.800255	0.00699488
C4J4E4	Monodehydroascorbate reductase homolog1	100501585	Monodehydroascorbate reductase homolog1 OS=Zea mays OX=4577 GN=100501585 PE=2 SV=1 - [C4J4E4_MAIZE]	46.7033	5.59229	0.799576	0.00610619
A0A317YDA9	Uncharacterized protein	Zm00014a_005978	Uncharacterized protein OS=Zea mays OX=4577 GN=Zm00014a_005978 PE=4 SV=1 - [A0A317YDA9_MAIZE]	16.4352	4.55127	0.798868	0.00255117
B4G038	Homoserine dehydrogenase	100282632	Homoserine dehydrogenase OS=Zea mays OX=4577 GN=100282632 PE=2 SV=1 - [B4G038_MAIZE]	40.5681	6.18896	0.79838	0.0289753
A0A1D6MCF3	Golgin candidate 5	ZEAMMB73_Zm00001d038982	Golgin candidate 5 OS=Zea mays OX=4577 GN=ZEAMMB73_Zm00001d038982 PE=4 SV=1 - [A0A1D6MCF3_MAIZE]	77.5746	5.04639	0.798277	0.0044599
B4G191	Uncharacterized protein		Uncharacterized protein OS=Zea mays OX=4577 PE=2 SV=1 - [B4G191_MAIZE]	50.4931	6.03662	0.79793	0.041018
K7U9N2	Putative subtilase family protein	103654203	Putative subtilase family protein OS=Zea mays OX=4577 GN=103654203 PE=4 SV=1 - [K7U9N2_MAIZE]	79.9367	8.51416	0.797776	0.0151418
K7TFA7	Putative oxidoreductase, aldo/keto reductase family protein	ZEAMMB73_Zm00001d023652	Putative oxidoreductase, aldo/keto reductase family protein OS=Zea mays OX=4577 GN=ZEAMMB73_Zm00001d023652 PE=4 SV=1 - [K7TFA7_MAIZE]	34.3636	5.42725	0.796278	0.0440293
A0A1D6JVP9	Subtilisin-like protease SBT1.6	ZEAMMB73_Zm00001d028391	Subtilisin-like protease SBT1.6 OS=Zea mays OX=4577 GN=ZEAMMB73_Zm00001d028391 PE=4 SV=1 - [A0A1D6JVP9_MAIZE]	81.149	8.03076	0.795592	0.014158
A0A1D6LJU9	Plant/F18O14-17 protein	103629390	Plant/F18O14-17 protein OS=Zea mays OX=4577 GN=103629390 PE=4 SV=1 - [A0A1D6LJU9_MAIZE]	67.4709	8.26514	0.795486	0.0062482
B6TT00	Endochitinase PR4	100284387	Endochitinase PR4 OS=Zea mays OX=4577 GN=100284387 PE=2 SV=1 - [B6TT00_MAIZE]	28.5454	5.35107	0.795483	0.0246755
A0A1D6H552	Uncharacterized protein	100217299	Uncharacterized protein OS=Zea mays OX=4577 GN=100217299 PE=4 SV=1 - [A0A1D6H552_MAIZE]	17.323	10.7407	0.795327	0.0208312
C0PIK1	Uncharacterized protein		Uncharacterized protein OS=Zea mays OX=4577 PE=2 SV=1 - [C0PIK1_MAIZE]	23.2448	8.95361	0.794815	0.0119929
A0A1D6NE88	WD-repeat protein RBAP2	542087	WD-repeat protein RBAP2 OS=Zea mays OX=4577 GN=542087 PE=4 SV=1 - [A0A1D6NE88_MAIZE]	40.2161	6.63916	0.794707	0.00306309
B4F9J1	Beta-galactosidase	100191631	Beta-galactosidase OS=Zea mays OX=4577 GN=100191631 PE=2 SV=1 - [B4F9J1_MAIZE]	78.6385	7.97217	0.794597	0.00224729
A0A1D6Q3E2	2-hydroxy-3-oxopropionate reductase	ZEAMMB73_Zm00001d050810	2-hydroxy-3-oxopropionate reductase OS=Zea mays OX=4577 GN=ZEAMMB73_Zm00001d050810 PE=4 SV=1 - [A0A1D6Q3E2_MAIZE]	24.0202	5.43994	0.794473	0.0186142
B4FKF8	Cytochrome P450 CYP51H12	ZEAMMB73_Zm00001d044120	Cytochrome P450 CYP51H12 OS=Zea mays OX=4577 GN=ZEAMMB73_Zm00001d044120 PE=2 SV=1 - [B4FKF8_MAIZE]	55.444	8.41162	0.793086	0.0248463
A0A1D6KC60	Ubiquitin carboxyl-terminal hydrolase 10	103638427	Ubiquitin carboxyl-terminal hydrolase 10 OS=Zea mays OX=4577 GN=103638427 PE=3 SV=1 - [A0A1D6KC60_MAIZE]	50.8286	6.11279	0.792529	0.0112914
A0A1D6P022	UDP-glycosyltransferase 88A1	ZEAMMB73_Zm00001d045952	UDP-glycosyltransferase 88A1 OS=Zea mays OX=4577 GN=ZEAMMB73_Zm00001d045952 PE=4 SV=1 - [A0A1D6P022_MAIZE]	31.1911	5.43994	0.79197	0.0250542
A0A1D6QLC9	Cysteine-rich receptor-like protein kinase 6	ZEAMMB73_Zm00001d052989	Cysteine-rich receptor-like protein kinase 6 OS=Zea mays OX=4577 GN=ZEAMMB73_Zm00001d052989 PE=4 SV=1 - [A0A1D6QLC9_MAIZE]	35.3602	6.53662	0.791863	0.0289798
B4FR31	Leucine-rich repeat extensin-like protein 6	100281253	Leucine-rich repeat extensin-like protein 6 OS=Zea mays OX=4577 GN=100281253 PE=2 SV=1 - [B4FR31_MAIZE]	41.3479	6.37939	0.79171	0.011158
B4FK90	Brain protein 16		Brain protein 16 OS=Zea mays OX=4577 PE=2 SV=1 - [B4FK90_MAIZE]	37.4206	5.07178	0.79133	0.0143095
B4FPK8	Cytochrome B5 isoform D	ZEAMMB73_Zm00001d011786	Cytochrome B5 isoform D OS=Zea mays OX=4577 GN=ZEAMMB73_Zm00001d011786 PE=2 SV=1 - [B4FPK8_MAIZE]	14.9005	5.30029	0.789839	0.00815101
B6SQU6	60S ribosomal protein L9		60S ribosomal protein L9 OS=Zea mays OX=4577 PE=2 SV=1 - [B6SQU6_MAIZE]	21.4616	9.70068	0.789437	0.00554524
B6TG61	40S ribosomal protein S16	100283242	40S ribosomal protein S16 OS=Zea mays OX=4577 GN=100283242 PE=2 SV=1 - [B6TG61_MAIZE]	16.7392	10.6675	0.789411	0.0496473
B6TFE4	Ribokinase	ZEAMMB73_Zm00001d011526	Ribokinase OS=Zea mays OX=4577 GN=ZEAMMB73_Zm00001d011526 PE=2 SV=1 - [B6TFE4_MAIZE]	37.4865	6.26514	0.789051	0.00105787
A0A1D6L4K3	Inosine-5'-monophosphate dehydrogenase	ZEAMMB73_Zm00001d034023	Inosine-5'-monophosphate dehydrogenase OS=Zea mays OX=4577 GN=ZEAMMB73_Zm00001d034023 PE=3 SV=1 - [A0A1D6L4K3_MAIZE]	52.5377	6.27783	0.78899	0.0216962
A0A1D6N1C7	Villin-2	100273789	Villin-2 OS=Zea mays OX=4577 GN=100273789 PE=4 SV=1 - [A0A1D6N1C7_MAIZE]	69.9845	6.43018	0.788161	0.0496811
A0A1D6NJX0	Carbamoyl-phosphate synthase large chain chloroplastic	103651512	Carbamoyl-phosphate synthase large chain chloroplastic OS=Zea mays OX=4577 GN=103651512 PE=3 SV=1 - [A0A1D6NJX0_MAIZE]	124.899	5.51611	0.78767	0.0217228
Q5XLE1	Peptidylprolyl isomerase	542519	Peptidylprolyl isomerase OS=Zea mays OX=4577 GN=542519 PE=2 SV=1 - [Q5XLE1_MAIZE]	12.1771	8.45557	0.786904	0.00252117
B6T346	THO complex subunit 4B	100279524	THO complex subunit 4B OS=Zea mays OX=4577 GN=100279524 PE=2 SV=1 - [B6T346_MAIZE]	26.5375	10.2427	0.786744	0.0131796
A0A1D6FEB9	Gamma-glutamyltranspeptidase 3	ZEAMMB73_Zm00001d008628	Gamma-glutamyltranspeptidase 3 OS=Zea mays OX=4577 GN=ZEAMMB73_Zm00001d008628 PE=4 SV=1 - [A0A1D6FEB9_MAIZE]	77.3169	7.47412	0.786525	0.00883033
B4G1R4	Peroxidase	100216859	Peroxidase OS=Zea mays OX=4577 GN=100216859 PE=2 SV=1 - [B4G1R4_MAIZE]	36.6633	6.87354	0.785407	0.0358754
B6TNG9	Aminoacylase-1		Aminoacylase-1 OS=Zea mays OX=4577 PE=2 SV=1 - [B6TNG9_MAIZE]	48.2936	6.48096	0.785397	0.00659795
B6SP06	Glycine-rich protein 2b		Glycine-rich protein 2b OS=Zea mays OX=4577 PE=2 SV=1 - [B6SP06_MAIZE]	20.2869	6.34131	0.785144	0.0126108
A0A1D6FBJ6	Peroxidase	ZEAMMB73_Zm00001d008300	Peroxidase OS=Zea mays OX=4577 GN=ZEAMMB73_Zm00001d008300 PE=3 SV=1 - [A0A1D6FBJ6_MAIZE]	38.6066	6.78564	0.78497	0.0482392
C4J5T9	Uncharacterized protein		Uncharacterized protein OS=Zea mays OX=4577 PE=2 SV=1 - [C4J5T9_MAIZE]	58.4453	7.89893	0.784282	0.00796848
A0A1D6IYF8	RNA-binding KH domain-containing protein	100384498	RNA-binding KH domain-containing protein OS=Zea mays OX=4577 GN=100384498 PE=4 SV=1 - [A0A1D6IYF8_MAIZE]	66.6516	7.62061	0.783324	0.0130422
A0A1D6M2Z2	Putative thaumatin domain family protein	ZEAMMB73_Zm00001d038069	Putative thaumatin domain family protein OS=Zea mays OX=4577 GN=ZEAMMB73_Zm00001d038069 PE=4 SV=1 - [A0A1D6M2Z2_MAIZE]	28.083	6.34131	0.783184	0.00710825
C4J9U1	Ras-related protein18A1	100383817	Ras-related protein18A1 OS=Zea mays OX=4577 GN=100383817 PE=2 SV=1 - [C4J9U1_MAIZE]	23.725	5.5415	0.782935	0.013937
A0A1D6L2M4	Histone H2A	ZEAMMB73_Zm00001d033822	Histone H2A OS=Zea mays OX=4577 GN=ZEAMMB73_Zm00001d033822 PE=3 SV=1 - [A0A1D6L2M4_MAIZE]	14.3698	10.2134	0.78228	0.0146268
B6T1H5	60S ribosomal protein L12-3	100281960	60S ribosomal protein L12-3 OS=Zea mays OX=4577 GN=100281960 PE=2 SV=1 - [B6T1H5_MAIZE]	17.7576	8.96826	0.782152	0.0430571
K7VEJ7	Nicotianamine synthase10	ZEAMMB73_Zm00001d047651	Nicotianamine synthase10 OS=Zea mays OX=4577 GN=ZEAMMB73_Zm00001d047651 PE=4 SV=1 - [K7VEJ7_MAIZE]	35.5472	6.46826	0.782079	0.0233599
B4FYN0	mitochondrial import inner membrane translocase subunit TIM13	100285351	mitochondrial import inner membrane translocase subunit TIM13 OS=Zea mays OX=4577 GN=100285351 PE=2 SV=1 - [B4FYN0_MAIZE]	9.28442	5.31299	0.781593	0.00921631
K7V329	Putative O-Glycosyl hydrolase superfamily protein	100502339	Putative O-Glycosyl hydrolase superfamily protein OS=Zea mays OX=4577 GN=100502339 PE=4 SV=1 - [K7V329_MAIZE]	82.8195	6.18896	0.781423	0.00721087
K7U735	Dirigent protein	103654365	Dirigent protein OS=Zea mays OX=4577 GN=103654365 PE=3 SV=1 - [K7U735_MAIZE]	19.0874	6.32861	0.781355	0.0461876
B4FU14	mitochondrial import inner membrane translocase subunit Tim9	100285519	mitochondrial import inner membrane translocase subunit Tim9 OS=Zea mays OX=4577 GN=100285519 PE=2 SV=1 - [B4FU14_MAIZE]	10.8592	6.11279	0.781045	0.0449571
B6T3V3	Mitochondrial import receptor subunit TOM22	TOM9-2	Mitochondrial import receptor subunit TOM22 OS=Zea mays OX=4577 GN=TOM9-2 PE=2 SV=1 - [B6T3V3_MAIZE]	9.75929	9.40771	0.780555	0.000407128
A0A1D6LUH5	Uncharacterized protein	100283265	Uncharacterized protein OS=Zea mays OX=4577 GN=100283265 PE=4 SV=1 - [A0A1D6LUH5_MAIZE]	36.8916	7.88428	0.780397	0.000398255
B8A0Q6	Succinate dehydrogenase [ubiquinone] flavoprotein subunit, mitochondrial	100279930	Succinate dehydrogenase [ubiquinone] flavoprotein subunit, mitochondrial OS=Zea mays OX=4577 GN=100279930 PE=2 SV=1 - [B8A0Q6_MAIZE]	67.9266	6.45557	0.779903	0.0240316
A0A1D6E839	Topoisomerase-like protein	ZEAMMB73_Zm00001d003265	Topoisomerase-like protein OS=Zea mays OX=4577 GN=ZEAMMB73_Zm00001d003265 PE=4 SV=1 - [A0A1D6E839_MAIZE]	73.544	5.12256	0.779732	0.00703688
B8A1J4	Uncharacterized protein		Uncharacterized protein OS=Zea mays OX=4577 PE=2 SV=1 - [B8A1J4_MAIZE]	11.4171	8.49951	0.779519	0.00254054
A0A317Y8X0	L-type lectin-domain containing receptor kinase IV.1	LECRK41_12	L-type lectin-domain containing receptor kinase IV.1 OS=Zea mays OX=4577 GN=LECRK41_12 PE=4 SV=1 - [A0A317Y8X0_MAIZE]	73.4727	6.7124	0.779453	0.0247684
A0A1D6F5Y9	OSJNBa0089K21.9-like protein	ZEAMMB73_Zm00001d007389	OSJNBa0089K21.9-like protein OS=Zea mays OX=4577 GN=ZEAMMB73_Zm00001d007389 PE=4 SV=1 - [A0A1D6F5Y9_MAIZE]	20.0252	9.48096	0.778553	0.0220229
A0A1D6GBA2	Phosphoenolpyruvate carboxylase 3	100384708	Phosphoenolpyruvate carboxylase 3 OS=Zea mays OX=4577 GN=100384708 PE=3 SV=1 - [A0A1D6GBA2_MAIZE]	101.607	6.7417	0.777361	0.0364458
A0A1D6LBD6	40S ribosomal protein S4	ZEAMMB73_Zm00001d034790	40S ribosomal protein S4 OS=Zea mays OX=4577 GN=ZEAMMB73_Zm00001d034790 PE=3 SV=1 - [A0A1D6LBD6_MAIZE]	27.9869	10.0229	0.777236	0.00253248
A0A1D6G8P5	Ribosomal protein L17 family protein	100284384	Ribosomal protein L17 family protein OS=Zea mays OX=4577 GN=100284384 PE=3 SV=1 - [A0A1D6G8P5_MAIZE]	15.4782	10.3452	0.776194	0.021745
A0A1D6P5H9	Transducin/WD40 repeat-like superfamily protein	ZEAMMB73_Zm00001d046930	Transducin/WD40 repeat-like superfamily protein OS=Zea mays OX=4577 GN=ZEAMMB73_Zm00001d046930 PE=4 SV=1 - [A0A1D6P5H9_MAIZE]	36.5052	7.56201	0.775558	0.0383755
A0A1D6IHR1	Uncharacterized protein	ZEAMMB73_Zm00001d021900	Uncharacterized protein OS=Zea mays OX=4577 GN=ZEAMMB73_Zm00001d021900 PE=4 SV=1 - [A0A1D6IHR1_MAIZE]	59.0053	6.25244	0.775465	0.049407
A0A317YGU2	Peptidyl-prolyl cis-trans isomerase	CYP18-2	Peptidyl-prolyl cis-trans isomerase OS=Zea mays OX=4577 GN=CYP18-2 PE=3 SV=1 - [A0A317YGU2_MAIZE]	16.4431	7.89893	0.774421	0.0460376
A0A1D6FP28	Peroxidase	ZEAMMB73_Zm00001d010064	Peroxidase OS=Zea mays OX=4577 GN=ZEAMMB73_Zm00001d010064 PE=3 SV=1 - [A0A1D6FP28_MAIZE]	35.4407	7.86963	0.773601	0.0272719
B4FPJ2	U6 snRNA-associated Sm-like protein LSm3	LSM3	U6 snRNA-associated Sm-like protein LSm3 OS=Zea mays OX=4577 GN=LSM3 PE=2 SV=1 - [B4FPJ2_MAIZE]	11.229	4.88135	0.772948	0.000648404
B8QN51	Mitogen-activated protein kinase	MPK7	Mitogen-activated protein kinase OS=Zea mays OX=4577 GN=MPK7 PE=2 SV=1 - [B8QN51_MAIZE]	44.9064	5.5542	0.772033	0.0476936
A0A1D6KI84	COP9 signalosome complex subunit 6a	100284689	COP9 signalosome complex subunit 6a OS=Zea mays OX=4577 GN=100284689 PE=4 SV=1 - [A0A1D6KI84_MAIZE]	28.1675	6.90283	0.771649	0.0425361
A0A1D6PDS8	Protein TOC75-3 chloroplastic	100501833	Protein TOC75-3 chloroplastic OS=Zea mays OX=4577 GN=100501833 PE=4 SV=1 - [A0A1D6PDS8_MAIZE]	69.3002	7.15186	0.77108	0.0245549
B6TLA2	Thioredoxin reductase		Thioredoxin reductase OS=Zea mays OX=4577 PE=2 SV=1 - [B6TLA2_MAIZE]	34.8564	5.8335	0.7705	0.00740543
A0A1D6G5V1	Mitochondrial import receptor subunit TOM20-4	ZEAMMB73_Zm00001d012017	Mitochondrial import receptor subunit TOM20-4 OS=Zea mays OX=4577 GN=ZEAMMB73_Zm00001d012017 PE=4 SV=1 - [A0A1D6G5V1_MAIZE]	11.6497	8.29443	0.770136	0.000325725
B4FLH6	NADH dehydrogenase [ubiquinone] 1 beta subcomplex subunit 7	100283425	NADH dehydrogenase [ubiquinone] 1 beta subcomplex subunit 7 OS=Zea mays OX=4577 GN=100283425 PE=2 SV=1 - [B4FLH6_MAIZE]	11.9531	7.78174	0.769571	0.0201487
A0A1D6QCK6	Mitogen-activated protein kinase kinase 5	ZEAMMB73_Zm00001d052066	Mitogen-activated protein kinase kinase 5 OS=Zea mays OX=4577 GN=ZEAMMB73_Zm00001d052066 PE=3 SV=1 - [A0A1D6QCK6_MAIZE]	39.4493	9.34912	0.769245	0.000549695
A0A1D6NJF4	Seh1-like protein	100284280	Seh1-like protein OS=Zea mays OX=4577 GN=100284280 PE=3 SV=1 - [A0A1D6NJF4_MAIZE]	27.4122	4.98291	0.769169	0.0406354
C0P846	Uncharacterized protein		Uncharacterized protein OS=Zea mays OX=4577 PE=2 SV=1 - [C0P846_MAIZE]	54.0317	6.771	0.768881	0.000109643
K7V969	Protein EXORDIUM	103637861	Protein EXORDIUM OS=Zea mays OX=4577 GN=103637861 PE=4 SV=1 - [K7V969_MAIZE]	32.9066	8.68994	0.767996	0.0370351
A0A1D6GFD7	Vacuolar protein sorting-associated protein 35	100279276	Vacuolar protein sorting-associated protein 35 OS=Zea mays OX=4577 GN=100279276 PE=3 SV=1 - [A0A1D6GFD7_MAIZE]	88.1683	5.49072	0.767255	0.0249563
B4FGG1	40S ribosomal protein S8		40S ribosomal protein S8 OS=Zea mays OX=4577 PE=2 SV=1 - [B4FGG1_MAIZE]	25.0964	10.3452	0.766643	0.00751917
B6TKC5	Nucleoside diphosphate kinase		Nucleoside diphosphate kinase OS=Zea mays OX=4577 PE=2 SV=1 - [B6TKC5_MAIZE]	25.9335	9.01221	0.765672	0.00198829
A0A1D6IYM2	AICARFT/IMPCHase bienzyme family protein	ZEAMMB73_Zm00001d024301	AICARFT/IMPCHase bienzyme family protein OS=Zea mays OX=4577 GN=ZEAMMB73_Zm00001d024301 PE=4 SV=1 - [A0A1D6IYM2_MAIZE]	34.9795	7.15186	0.765661	0.0254847
A0A1D6HD71	DNA-directed RNA polymerases II IV and V subunit 11	ZEAMMB73_Zm00001d017234	DNA-directed RNA polymerases II IV and V subunit 11 OS=Zea mays OX=4577 GN=ZEAMMB73_Zm00001d017234 PE=4 SV=1 - [A0A1D6HD71_MAIZE]	10.9645	6.52197	0.764864	0.00305346
A0A1D6H7D6	Coatomer subunit beta'	100383977	Coatomer subunit beta' OS=Zea mays OX=4577 GN=100383977 PE=3 SV=1 - [A0A1D6H7D6_MAIZE]	92.13	5.24951	0.763907	0.0451402
A0A1D6JZE2	Mitochondrial succinate-fumarate transporter 1	100191274	Mitochondrial succinate-fumarate transporter 1 OS=Zea mays OX=4577 GN=100191274 PE=3 SV=1 - [A0A1D6JZE2_MAIZE]	14.5115	9.92041	0.763475	0.0106868
B4FE30	10 kDa chaperonin	100193174	10 kDa chaperonin OS=Zea mays OX=4577 GN=100193174 PE=2 SV=1 - [B4FE30_MAIZE]	10.5369	8.39697	0.762672	0.00643666
A0A1D6MU58	E3 ubiquitin-protein ligase UPL1	ZEAMMB73_Zm00001d041105	E3 ubiquitin-protein ligase UPL1 OS=Zea mays OX=4577 GN=ZEAMMB73_Zm00001d041105 PE=4 SV=1 - [A0A1D6MU58_MAIZE]	389.267	5.63037	0.762207	0.0180629
A0A1D6HKY0	SNW/SKI-interacting protein	ZEAMMB73_Zm00001d018127	SNW/SKI-interacting protein OS=Zea mays OX=4577 GN=ZEAMMB73_Zm00001d018127 PE=4 SV=1 - [A0A1D6HKY0_MAIZE]	65.0079	9.29053	0.76179	0.000874982
C0PN11	Uncharacterized protein		Uncharacterized protein OS=Zea mays OX=4577 PE=2 SV=1 - [C0PN11_MAIZE]	24.849	6.0874	0.761464	0.0183969
B6U6D5	ATP-dependent 6-phosphofructokinase	PFK	ATP-dependent 6-phosphofructokinase OS=Zea mays OX=4577 GN=PFK PE=2 SV=1 - [B6U6D5_MAIZE]	58.9379	7.86963	0.760627	0.00138605
A0A1D6GUM3	Ribosomal RNA processing Brix domain protein	100216667	Ribosomal RNA processing Brix domain protein OS=Zea mays OX=4577 GN=100216667 PE=4 SV=1 - [A0A1D6GUM3_MAIZE]	10.9335	6.7124	0.759303	0.0323865
A0A1D6M542	Ferredoxin	ZEAMMB73_Zm00001d038291	Ferredoxin OS=Zea mays OX=4577 GN=ZEAMMB73_Zm00001d038291 PE=3 SV=1 - [A0A1D6M542_MAIZE]	16.1447	5.46533	0.758552	0.0361752
B4FP91	Epoxide hydrolase A	ephA_5	Epoxide hydrolase A OS=Zea mays OX=4577 GN=ephA_5 PE=2 SV=1 - [B4FP91_MAIZE]	37.1419	8.08936	0.758529	0.0139124
C0P5C9	Vacuolar sorting receptor 7	ZEAMMB73_Zm00001d046945	Vacuolar sorting receptor 7 OS=Zea mays OX=4577 GN=ZEAMMB73_Zm00001d046945 PE=2 SV=1 - [C0P5C9_MAIZE]	69.5815	6.17627	0.75771	0.0213683
B6SJE6	Flower-specific gamma-thionin		Flower-specific gamma-thionin OS=Zea mays OX=4577 PE=2 SV=1 - [B6SJE6_MAIZE]	7.24848	10.1694	0.756964	0.0038021
A0A1D6HJQ5	Dynamin-2A	103627697	Dynamin-2A OS=Zea mays OX=4577 GN=103627697 PE=3 SV=1 - [A0A1D6HJQ5_MAIZE]	100.246	9.17334	0.756514	0.0024005
A0A1D6PHQ2	Tetratricopeptide repeat (TPR)-like superfamily protein	100304428	Tetratricopeptide repeat (TPR)-like superfamily protein OS=Zea mays OX=4577 GN=100304428 PE=4 SV=1 - [A0A1D6PHQ2_MAIZE]	80.6378	4.88135	0.755541	0.00666639
B4FPG2	Actin-1	100282267	Actin-1 OS=Zea mays OX=4577 GN=100282267 PE=2 SV=1 - [B4FPG2_MAIZE]	41.6137	5.38916	0.755465	0.0448511
A0A1D6QRX4	Ubiquitin receptor RAD23b	100282427	Ubiquitin receptor RAD23b OS=Zea mays OX=4577 GN=100282427 PE=4 SV=1 - [A0A1D6QRX4_MAIZE]	37.1994	4.55127	0.754682	0.0366755
C0PH34	60S ribosomal protein L6	103627361	60S ribosomal protein L6 OS=Zea mays OX=4577 GN=103627361 PE=2 SV=1 - [C0PH34_MAIZE]	24.2232	10.0962	0.754615	0.0167481
A0A1D6N9U7	External alternative NAD(P)H-ubiquinone oxidoreductase B4 mitochondrial	ZEAMMB73_Zm00001d043266	External alternative NAD(P)H-ubiquinone oxidoreductase B4 mitochondrial OS=Zea mays OX=4577 GN=ZEAMMB73_Zm00001d043266 PE=4 SV=1 - [A0A1D6N9U7_MAIZE]	65.2735	9.01221	0.753231	0.0123233
A0A1D6L917	Mitochondrial Rho GTPase 1	103644237	Mitochondrial Rho GTPase 1 OS=Zea mays OX=4577 GN=103644237 PE=4 SV=1 - [A0A1D6L917_MAIZE]	62.7873	5.88428	0.751422	0.0230868
A0A1D6KCJ1	Alpha-L-fucosidase 2	ZEAMMB73_Zm00001d030471	Alpha-L-fucosidase 2 OS=Zea mays OX=4577 GN=ZEAMMB73_Zm00001d030471 PE=4 SV=1 - [A0A1D6KCJ1_MAIZE]	77.3216	5.56689	0.750558	0.00439528
A0A1D6MXW5	Heat shock protein 90-6 mitochondrial	100286003	Heat shock protein 90-6 mitochondrial OS=Zea mays OX=4577 GN=100286003 PE=3 SV=1 - [A0A1D6MXW5_MAIZE]	83.0774	5.60498	0.750522	0.00816634
A0A1D6HPW5	Protein BTR1	100273088	Protein BTR1 OS=Zea mays OX=4577 GN=100273088 PE=4 SV=1 - [A0A1D6HPW5_MAIZE]	33.51	5.88428	0.750263	0.00734505
A0A1D6HYA6	COP1-interacting protein-related	103632278	COP1-interacting protein-related OS=Zea mays OX=4577 GN=103632278 PE=4 SV=1 - [A0A1D6HYA6_MAIZE]	96.8166	8.47021	0.749351	0.00324598
B6TRW5	Uncharacterized protein		Uncharacterized protein OS=Zea mays OX=4577 PE=2 SV=1 - [B6TRW5_MAIZE]	39.1449	9.61279	0.748634	0.0264852
B4FJ20	Purine-uracil permease NCS1	100216652	Purine-uracil permease NCS1 OS=Zea mays OX=4577 GN=100216652 PE=2 SV=1 - [B4FJ20_MAIZE]	57.4263	9.65674	0.748183	0.0214929
B4FNR5	U6 snRNA-associated Sm-like protein LSm8	100284021	U6 snRNA-associated Sm-like protein LSm8 OS=Zea mays OX=4577 GN=100284021 PE=2 SV=1 - [B4FNR5_MAIZE]	10.8827	5.18604	0.7479	0.00362315
C0PKB8	Uncharacterized protein		Uncharacterized protein OS=Zea mays OX=4577 PE=2 SV=1 - [C0PKB8_MAIZE]	22.3236	6.52197	0.747593	0.00309606
C0P7E7	Actin-interacting protein 1-2	100382413	Actin-interacting protein 1-2 OS=Zea mays OX=4577 GN=100382413 PE=2 SV=1 - [C0P7E7_MAIZE]	66.1654	6.7124	0.747385	0.0047168
A0A1D6EIB9	2-isopropylmalate synthase 1 chloroplastic	ZEAMMB73_Zm00001d004960	2-isopropylmalate synthase 1 chloroplastic OS=Zea mays OX=4577 GN=ZEAMMB73_Zm00001d004960 PE=3 SV=1 - [A0A1D6EIB9_MAIZE]	66.322	7.23975	0.746485	0.0161742
A0A1D6N3M7	DEAD box RNA helicase1	ZEAMMB73_Zm00001d042416	DEAD box RNA helicase1 OS=Zea mays OX=4577 GN=ZEAMMB73_Zm00001d042416 PE=3 SV=1 - [A0A1D6N3M7_MAIZE]	49.5117	9.5542	0.7459	0.00172975
A0A1D6NDK6	MEK homolog1	542356	MEK homolog1 OS=Zea mays OX=4577 GN=542356 PE=3 SV=1 - [A0A1D6NDK6_MAIZE]	34.5939	6.17627	0.745887	0.00501154
A0A1D6NDD7	HVA22-like protein	ZEAMMB73_Zm00001d043578	HVA22-like protein OS=Zea mays OX=4577 GN=ZEAMMB73_Zm00001d043578 PE=3 SV=1 - [A0A1D6NDD7_MAIZE]	13.517	9.83252	0.743739	0.00524757
B4FGJ4	Pyruvate dehydrogenase E1 component subunit alpha	732791	Pyruvate dehydrogenase E1 component subunit alpha OS=Zea mays OX=4577 GN=732791 PE=2 SV=1 - [B4FGJ4_MAIZE]	42.7234	8.19189	0.742883	0.00311897
A0A1D6F150	Alpha/beta-Hydrolases superfamily protein	100192944	Alpha/beta-Hydrolases superfamily protein OS=Zea mays OX=4577 GN=100192944 PE=4 SV=1 - [A0A1D6F150_MAIZE]	24.384	5.59229	0.742574	0.031998
A0A1D6L6W5	Syntaxin 121	ZEAMMB73_Zm00001d034365	Syntaxin 121 OS=Zea mays OX=4577 GN=ZEAMMB73_Zm00001d034365 PE=3 SV=1 - [A0A1D6L6W5_MAIZE]	33.1974	8.42627	0.742038	0.0115101
B6SX86	Uncharacterized protein		Uncharacterized protein OS=Zea mays OX=4577 PE=2 SV=1 - [B6SX86_MAIZE]	12.1159	5.49072	0.741049	0.0285232
B6SGJ8	Uncharacterized protein		Uncharacterized protein OS=Zea mays OX=4577 PE=2 SV=1 - [B6SGJ8_MAIZE]	9.73004	5.10986	0.740634	0.00276722
A0A1D6KSJ3	Cytochrome P450 86B1	ZEAMMB73_Zm00001d032651	Cytochrome P450 86B1 OS=Zea mays OX=4577 GN=ZEAMMB73_Zm00001d032651 PE=3 SV=1 - [A0A1D6KSJ3_MAIZE]	60.2082	8.20654	0.740482	0.0220518
B4FC78	Uncharacterized protein		Uncharacterized protein OS=Zea mays OX=4577 PE=2 SV=1 - [B4FC78_MAIZE]	21.1106	6.354	0.739079	0.0466329
C0P406	Vesicle-fusing ATPase	100382060	Vesicle-fusing ATPase OS=Zea mays OX=4577 GN=100382060 PE=2 SV=1 - [C0P406_MAIZE]	81.2672	6.06201	0.738725	0.000444338
B4FY73	Germin-like protein subfamily 2 member 1	100273935	Germin-like protein subfamily 2 member 1 OS=Zea mays OX=4577 GN=100273935 PE=2 SV=1 - [B4FY73_MAIZE]	22.8066	7.09326	0.737592	0.0214612
A0A1D6PZE3	Putative fucosyltransferase-like protein	778434	Putative fucosyltransferase-like protein OS=Zea mays OX=4577 GN=778434 PE=3 SV=1 - [A0A1D6PZE3_MAIZE]	36.9011	4.99561	0.736927	0.0351879
A0A1D6DXC1	Eukaryotic translation initiation factor 3 subunit C	100272475	Eukaryotic translation initiation factor 3 subunit C OS=Zea mays OX=4577 GN=100272475 PE=3 SV=1 - [A0A1D6DXC1_MAIZE]	104.552	5.47803	0.736926	0.00663809
A0A1D6H4T9	Uncharacterized protein	100276733	Uncharacterized protein OS=Zea mays OX=4577 GN=100276733 PE=4 SV=1 - [A0A1D6H4T9_MAIZE]	13.5661	8.73389	0.736869	0.00262971
A0A1D6IL72	Phosphatidylinositol 3-and 4-kinase family protein with FAT domain	ZEAMMB73_Zm00001d022338	Phosphatidylinositol 3-and 4-kinase family protein with FAT domain OS=Zea mays OX=4577 GN=ZEAMMB73_Zm00001d022338 PE=3 SV=1 - [A0A1D6IL72_MAIZE]	439.556	7.28369	0.733413	0.014928
B6SZF0	Metal-dependent phosphohydrolase, HD subdomain	100281834	Metal-dependent phosphohydrolase, HD subdomain OS=Zea mays OX=4577 GN=100281834 PE=2 SV=1 - [B6SZF0_MAIZE]	24.9987	5.69385	0.731254	0.00294998
B6T337	Uncharacterized protein	101202700	Uncharacterized protein OS=Zea mays OX=4577 GN=101202700 PE=2 SV=1 - [B6T337_MAIZE]	14.7018	10.1255	0.730801	0.00725266
C0P3X0	Farnesyl pyrophosphate synthase1	541903	Farnesyl pyrophosphate synthase1 OS=Zea mays OX=4577 GN=541903 PE=2 SV=1 - [C0P3X0_MAIZE]	36.4106	5.60498	0.729988	0.000737905
A0A096RYW9	Pentatricopeptide repeat-containing protein ELI1 chloroplastic	100193853	Pentatricopeptide repeat-containing protein ELI1 chloroplastic OS=Zea mays OX=4577 GN=100193853 PE=4 SV=1 - [A0A096RYW9_MAIZE]	44.3672	6.55127	0.72867	0.00771447
A0A1D6FK96	Fasciclin-like arabinogalactan protein 6	ZEAMMB73_Zm00001d009566	Fasciclin-like arabinogalactan protein 6 OS=Zea mays OX=4577 GN=ZEAMMB73_Zm00001d009566 PE=4 SV=1 - [A0A1D6FK96_MAIZE]	26.2125	9.45166	0.728228	0.021342
C4J662	(+)-neomenthol dehydrogenase	100282122	(+)-neomenthol dehydrogenase OS=Zea mays OX=4577 GN=100282122 PE=2 SV=1 - [C4J662_MAIZE]	33.3233	5.24951	0.727406	0.00446317
A0A1D6KIX1	3-oxoacyl-reductase	ZEAMMB73_Zm00001d031453	3-oxoacyl-reductase OS=Zea mays OX=4577 GN=ZEAMMB73_Zm00001d031453 PE=3 SV=1 - [A0A1D6KIX1_MAIZE]	29.5866	9.49561	0.727213	0.0033541
Q5I204	Brain acid soluble protein 1	542208	Brain acid soluble protein 1 OS=Zea mays OX=4577 GN=542208 PE=2 SV=1 - [Q5I204_MAIZE]	38.2844	4.55127	0.724939	0.0448886
B6SSX1	Anthocyanin 5-aromatic acyltransferase		Anthocyanin 5-aromatic acyltransferase OS=Zea mays OX=4577 PE=2 SV=1 - [B6SSX1_MAIZE]	47.5712	5.70654	0.724927	0.00878872
B4FLR9	Uncharacterized protein		Uncharacterized protein OS=Zea mays OX=4577 PE=2 SV=1 - [B4FLR9_MAIZE]	15.9022	4.97021	0.723268	0.00430638
B6SVG1	ATPase 3		ATPase 3 OS=Zea mays OX=4577 PE=2 SV=1 - [B6SVG1_MAIZE]	55.5573	7.06396	0.722491	0.00856838
B4FU06	DNA-directed RNA polymerases II 24 kDa polypeptide	100273250	DNA-directed RNA polymerases II 24 kDa polypeptide OS=Zea mays OX=4577 GN=100273250 PE=2 SV=1 - [B4FU06_MAIZE]	24.8532	9.37842	0.720256	0.0157019
B4FWK0	Eukaryotic translation initiation factor 3 subunit D	100273610	Eukaryotic translation initiation factor 3 subunit D OS=Zea mays OX=4577 GN=100273610 PE=2 SV=1 - [B4FWK0_MAIZE]	64.8457	5.70654	0.717922	0.0220355
B4FUX9	Uncharacterized protein	100273359	Uncharacterized protein OS=Zea mays OX=4577 GN=100273359 PE=2 SV=1 - [B4FUX9_MAIZE]	19.7677	4.67822	0.717817	0.00194595
B6U961	60S ribosomal protein L31	100285759	60S ribosomal protein L31 OS=Zea mays OX=4577 GN=100285759 PE=2 SV=1 - [B6U961_MAIZE]	14.3607	10.0962	0.715675	0.00275269
B4FMT6	Uncharacterized protein		Uncharacterized protein OS=Zea mays OX=4577 PE=2 SV=1 - [B4FMT6_MAIZE]	16.9576	8.85107	0.713743	0.0100912
Q9ZR52	Casein kinase II alpha subunit	CK2	Casein kinase II alpha subunit OS=Zea mays OX=4577 GN=CK2 PE=2 SV=1 - [Q9ZR52_MAIZE]	39.2842	8.30908	0.711945	0.000935085
A0A1D6EVW0	Ribulose bisphosphate carboxylase large chain	ZEAMMB73_Zm00001d006402	Ribulose bisphosphate carboxylase large chain OS=Zea mays OX=4577 GN=ZEAMMB73_Zm00001d006402 PE=3 SV=1 - [A0A1D6EVW0_MAIZE]	67.3702	9.36377	0.707335	0.000520801
B6SMT2	Uncharacterized protein	100275045	Uncharacterized protein OS=Zea mays OX=4577 GN=100275045 PE=2 SV=1 - [B6SMT2_MAIZE]	12.5333	8.35303	0.706727	0.0184319
B6T0Q6	Uncharacterized protein		Uncharacterized protein OS=Zea mays OX=4577 PE=2 SV=1 - [B6T0Q6_MAIZE]	7.40389	5.021	0.705659	0.0211007
A0A1D6GF42	40S ribosomal protein S2-1	103625791	40S ribosomal protein S2-1 OS=Zea mays OX=4577 GN=103625791 PE=3 SV=1 - [A0A1D6GF42_MAIZE]	29.7989	10.1694	0.704849	0.0464553
A0A1D6L5P9	Peroxidase	100382459	Peroxidase OS=Zea mays OX=4577 GN=100382459 PE=3 SV=1 - [A0A1D6L5P9_MAIZE]	27.3779	4.85596	0.703284	0.0142546
B4G0V7	Alpha carbonic anhydrase 7	100280638	Alpha carbonic anhydrase 7 OS=Zea mays OX=4577 GN=100280638 PE=2 SV=1 - [B4G0V7_MAIZE]	31.2168	7.10791	0.702572	0.0163749
A0A075T3E7	Pyrabactin resistance-like protein	PYL1	Pyrabactin resistance-like protein OS=Zea mays OX=4577 GN=PYL1 PE=2 SV=1 - [A0A075T3E7_MAIZE]	22.7544	5.08447	0.701676	0.000364645
K7W6W9	Root cap-specific protein	103638108	Root cap-specific protein OS=Zea mays OX=4577 GN=103638108 PE=3 SV=1 - [K7W6W9_MAIZE]	41.283	8.104	0.701514	0.0022659
C4J095	Uncharacterized protein		Uncharacterized protein OS=Zea mays OX=4577 PE=2 SV=1 - [C4J095_MAIZE]	62.876	7.31299	0.701128	0.00167479
A0A1D6G0W8	Putative DUF1296 domain containing family protein	103636139	Putative DUF1296 domain containing family protein OS=Zea mays OX=4577 GN=103636139 PE=4 SV=1 - [A0A1D6G0W8_MAIZE]	41.0318	6.53662	0.698844	0.0108631
B6UE00	Soluble inorganic pyrophosphatase		Soluble inorganic pyrophosphatase OS=Zea mays OX=4577 PE=2 SV=1 - [B6UE00_MAIZE]	24.2671	5.69385	0.698421	0.00414033
C0HHP5	Serine/threonine-protein phosphatase		Serine/threonine-protein phosphatase OS=Zea mays OX=4577 PE=2 SV=1 - [C0HHP5_MAIZE]	35.7398	5.45264	0.694544	0.0178729
A0A1D6FVP5	Uncharacterized protein	ZEAMMB73_Zm00001d011062	Uncharacterized protein OS=Zea mays OX=4577 GN=ZEAMMB73_Zm00001d011062 PE=4 SV=1 - [A0A1D6FVP5_MAIZE]	55.7098	6.49365	0.694543	0.0200187
C0PEB0	OSJNBa0006B20.20-like protein	100384408	OSJNBa0006B20.20-like protein OS=Zea mays OX=4577 GN=100384408 PE=2 SV=1 - [C0PEB0_MAIZE]	37.872	8.49951	0.69448	0.0020384
A0A1D6ILS7	Protein transport protein SEC31 homolog B	103633515	Protein transport protein SEC31 homolog B OS=Zea mays OX=4577 GN=103633515 PE=4 SV=1 - [A0A1D6ILS7_MAIZE]	110.23	5.63037	0.694131	0.0140812
A0A1D6HJS1	Pyruvate dehydrogenase E1 component subunit alpha	ZEAMMB73_Zm00001d017985	Pyruvate dehydrogenase E1 component subunit alpha OS=Zea mays OX=4577 GN=ZEAMMB73_Zm00001d017985 PE=4 SV=1 - [A0A1D6HJS1_MAIZE]	42.6735	8.00146	0.693139	0.00703609
C0HHC4	Nucleoside diphosphate kinase	100381602	Nucleoside diphosphate kinase OS=Zea mays OX=4577 GN=100381602 PE=2 SV=1 - [C0HHC4_MAIZE]	16.8197	7.50342	0.691458	0.00486
B6T379	40S ribosomal protein S15		40S ribosomal protein S15 OS=Zea mays OX=4577 PE=2 SV=1 - [B6T379_MAIZE]	17.1303	10.1108	0.689274	0.0122742
A0A1D6MX78	Prefoldin subunit 3	ZEAMMB73_Zm00001d041597	Prefoldin subunit 3 OS=Zea mays OX=4577 GN=ZEAMMB73_Zm00001d041597 PE=3 SV=1 - [A0A1D6MX78_MAIZE]	20.9719	5.30029	0.688686	0.0133992
B6UER7	DNA-binding protein		DNA-binding protein OS=Zea mays OX=4577 PE=2 SV=1 - [B6UER7_MAIZE]	63.0836	11.312	0.688137	0.00484596
A0A1D6K431	Peroxidase	ZEAMMB73_Zm00001d029274	Peroxidase OS=Zea mays OX=4577 GN=ZEAMMB73_Zm00001d029274 PE=3 SV=1 - [A0A1D6K431_MAIZE]	35.7017	5.65576	0.684266	0.00330528
C0PNN6	Uncharacterized protein		Uncharacterized protein OS=Zea mays OX=4577 PE=2 SV=1 - [C0PNN6_MAIZE]	45.9556	5.41455	0.683501	0.0460925
B4FBD0	Endoplasmic reticulum vesicle transporter protein	100192107	Endoplasmic reticulum vesicle transporter protein OS=Zea mays OX=4577 GN=100192107 PE=2 SV=1 - [B4FBD0_MAIZE]	33.6141	7.2251	0.682824	0.013525
A0A1D6KZE3	Glycine-rich RNA-binding protein RZ1C	100381912	Glycine-rich RNA-binding protein RZ1C OS=Zea mays OX=4577 GN=100381912 PE=4 SV=1 - [A0A1D6KZE3_MAIZE]	28.1439	9.14404	0.682002	0.000628886
Q8W527	Methylenetetrahydrofolate dehydrogenase/methylenetetrahydrofolate cylcohydrolase isoform 2 (Fragment)		Methylenetetrahydrofolate dehydrogenase/methylenetetrahydrofolate cylcohydrolase isoform 2 (Fragment) OS=Zea mays OX=4577 PE=2 SV=1 - [Q8W527_MAIZE]	16.9239	7.91357	0.681162	0.0367443
C0PJB1	Uncharacterized protein		Uncharacterized protein OS=Zea mays OX=4577 PE=2 SV=1 - [C0PJB1_MAIZE]	63.626	8.01611	0.680242	0.00130589
B6THH7	Isoamyl acetate-hydrolyzing esterase	100286087	Isoamyl acetate-hydrolyzing esterase OS=Zea mays OX=4577 GN=100286087 PE=2 SV=1 - [B6THH7_MAIZE]	26.5704	5.19873	0.680176	0.000677124
A0A1D6IHH1	Protein FREE1	100279323	Protein FREE1 OS=Zea mays OX=4577 GN=100279323 PE=4 SV=1 - [A0A1D6IHH1_MAIZE]	17.8196	7.56201	0.679061	0.0088802
A0A1D6ESY7	Cytochrome b561 and DOMON domain-containing protein	ZEAMMB73_Zm00001d006111	Cytochrome b561 and DOMON domain-containing protein OS=Zea mays OX=4577 GN=ZEAMMB73_Zm00001d006111 PE=4 SV=1 - [A0A1D6ESY7_MAIZE]	22.2429	5.74463	0.678887	0.000114899
A0A1D6LEN8	MA3 domain-containing protein	100501384	MA3 domain-containing protein OS=Zea mays OX=4577 GN=100501384 PE=4 SV=1 - [A0A1D6LEN8_MAIZE]	78.8793	5.36377	0.678432	0.00281027
B4FAX1	Glycosyltransferase family 61 protein	100272910	Glycosyltransferase family 61 protein OS=Zea mays OX=4577 GN=100272910 PE=2 SV=1 - [B4FAX1_MAIZE]	58.1608	6.25244	0.678283	0.00213458
B4FUN0	Uncharacterized protein		Uncharacterized protein OS=Zea mays OX=4577 PE=2 SV=1 - [B4FUN0_MAIZE]	23.0453	6.21436	0.676855	0.0144944
B6SLR4	Small nuclear ribonucleoprotein Sm D2	100280773	Small nuclear ribonucleoprotein Sm D2 OS=Zea mays OX=4577 GN=100280773 PE=2 SV=1 - [B6SLR4_MAIZE]	12.0114	9.93506	0.676461	0.00130612
A0A1D6GNE6	Methionine aminopeptidase	100283250	Methionine aminopeptidase OS=Zea mays OX=4577 GN=100283250 PE=3 SV=1 - [A0A1D6GNE6_MAIZE]	31.4038	7.15186	0.673777	0.00329135
B6U7Y1	Activator heat shock protein ATPase	ahsa_0	Activator heat shock protein ATPase OS=Zea mays OX=4577 GN=ahsa_0 PE=2 SV=1 - [B6U7Y1_MAIZE]	38.5768	5.41455	0.671763	0.000870931
C0HFI5	ATP-dependent 6-phosphofructokinase	100857010	ATP-dependent 6-phosphofructokinase OS=Zea mays OX=4577 GN=100857010 PE=2 SV=1 - [C0HFI5_MAIZE]	57.2572	7.85498	0.671475	0.000573693
A0A1D6K136	Membrane steroid-binding protein 1	ZEAMMB73_Zm00001d028955	Membrane steroid-binding protein 1 OS=Zea mays OX=4577 GN=ZEAMMB73_Zm00001d028955 PE=3 SV=1 - [A0A1D6K136_MAIZE]	21.4946	4.41162	0.670658	0.00123265
C0P3H1	Ubiquitin carboxyl-terminal hydrolase		Ubiquitin carboxyl-terminal hydrolase OS=Zea mays OX=4577 PE=2 SV=1 - [C0P3H1_MAIZE]	37.1751	5.61768	0.670502	0.00471449
A0A1D6QAU6	TBC1 domain family member 22A	100286052	TBC1 domain family member 22A OS=Zea mays OX=4577 GN=100286052 PE=4 SV=1 - [A0A1D6QAU6_MAIZE]	34.5912	5.74463	0.670158	0.0199821
B7ZXN1	Ferritin		Ferritin OS=Zea mays OX=4577 PE=2 SV=1 - [B7ZXN1_MAIZE]	12.7685	5.49072	0.668621	0.00898738
A0A1D6N096	Zinc transporter 2	ZEAMMB73_Zm00001d041959	Zinc transporter 2 OS=Zea mays OX=4577 GN=ZEAMMB73_Zm00001d041959 PE=4 SV=1 - [A0A1D6N096_MAIZE]	37.8765	7.02002	0.666163	0.00385604
B4FB96	Late embryogenesis abundant (LEA) hydroxyproline-rich glycoprotein family	100192081	Late embryogenesis abundant (LEA) hydroxyproline-rich glycoprotein family OS=Zea mays OX=4577 GN=100192081 PE=2 SV=1 - [B4FB96_MAIZE]	21.2972	9.86182	0.66499	0.0041805
B6UIM2	40S ribosomal protein S10		40S ribosomal protein S10 OS=Zea mays OX=4577 PE=2 SV=1 - [B6UIM2_MAIZE]	20.0901	9.80322	0.664615	0.0402561
B6SSV0	Uncharacterized protein	100276726	Uncharacterized protein OS=Zea mays OX=4577 GN=100276726 PE=2 SV=1 - [B6SSV0_MAIZE]	22.9999	5.04639	0.662883	0.0197856
B6SQM0	Major pollen allergen Car b 1 isoforms 1A and 1B	100280979	Major pollen allergen Car b 1 isoforms 1A and 1B OS=Zea mays OX=4577 GN=100280979 PE=2 SV=1 - [B6SQM0_MAIZE]	16.7728	5.05908	0.662749	0.00319684
A0A1D6LBB2	G-type lectin S-receptor-like serine/threonine-protein kinase	103644303	G-type lectin S-receptor-like serine/threonine-protein kinase OS=Zea mays OX=4577 GN=103644303 PE=4 SV=1 - [A0A1D6LBB2_MAIZE]	90.8718	7.72314	0.662354	0.00127367
A0A1D6N9F5	Cytidine methyl kinase1	100282760	Cytidine methyl kinase1 OS=Zea mays OX=4577 GN=100282760 PE=4 SV=1 - [A0A1D6N9F5_MAIZE]	28.2284	9.75928	0.662256	0.00140616
C0P4E8	Nodulin-related protein 1	100382106	Nodulin-related protein 1 OS=Zea mays OX=4577 GN=100382106 PE=2 SV=1 - [C0P4E8_MAIZE]	46.5857	6.18896	0.661201	0.00249538
B6TI68	Nucleic acid binding protein		Nucleic acid binding protein OS=Zea mays OX=4577 PE=2 SV=1 - [B6TI68_MAIZE]	28.0263	7.21045	0.660975	0.00113343
A0A1D6HR96	Purple acid phosphatase	ZEAMMB73_Zm00001d018653	Purple acid phosphatase OS=Zea mays OX=4577 GN=ZEAMMB73_Zm00001d018653 PE=3 SV=1 - [A0A1D6HR96_MAIZE]	73.3962	6.354	0.660327	0.0121682
A0A1D6GHZ6	Vps51/Vps67 family (Components of vesicular transport) protein	541772	Vps51/Vps67 family (Components of vesicular transport) protein OS=Zea mays OX=4577 GN=541772 PE=4 SV=1 - [A0A1D6GHZ6_MAIZE]	76.6465	6.84424	0.656914	0.0178089
A0A1D6NCX6	Putative 3-hydroxyisobutyrate dehydrogenase-like 1 mitochondrial	ZEAMMB73_Zm00001d043514	Putative 3-hydroxyisobutyrate dehydrogenase-like 1 mitochondrial OS=Zea mays OX=4577 GN=ZEAMMB73_Zm00001d043514 PE=4 SV=1 - [A0A1D6NCX6_MAIZE]	32.0605	6.91748	0.655005	0.000555702
A0A1D6E3E1	Prolyl oligopeptidase family protein	103646079	Prolyl oligopeptidase family protein OS=Zea mays OX=4577 GN=103646079 PE=4 SV=1 - [A0A1D6E3E1_MAIZE]	13.5181	11.5024	0.652538	0.021365
B4FT75	Uncharacterized protein		Uncharacterized protein OS=Zea mays OX=4577 PE=2 SV=1 - [B4FT75_MAIZE]	37.2063	9.36377	0.64836	0.00119744
B7ZX64	Long chain acyl-CoA synthetase 1	100279270	Long chain acyl-CoA synthetase 1 OS=Zea mays OX=4577 GN=100279270 PE=2 SV=1 - [B7ZX64_MAIZE]	74.9834	7.59131	0.646189	0.00019605
C0PK64	Nucleoside diphosphate kinase		Nucleoside diphosphate kinase OS=Zea mays OX=4577 PE=2 SV=1 - [C0PK64_MAIZE]	18.0484	6.55127	0.645283	0.00130977
A0A1D6EUB1	Enoyl-CoA hydratase 2 peroxisomal	100272552	Enoyl-CoA hydratase 2 peroxisomal OS=Zea mays OX=4577 GN=100272552 PE=4 SV=1 - [A0A1D6EUB1_MAIZE]	12.4172	5.04639	0.644139	0.000945964
A0A1D6MR13	Type III polyketide synthase B	103650032	Type III polyketide synthase B OS=Zea mays OX=4577 GN=103650032 PE=3 SV=1 - [A0A1D6MR13_MAIZE]	43.3982	6.75635	0.6439	0.0153918
B6TXQ6	GrpE protein homolog		GrpE protein homolog OS=Zea mays OX=4577 PE=2 SV=1 - [B6TXQ6_MAIZE]	36.0342	4.64014	0.64353	0.00501465
C0PEY1	Orphans transcription factor	100383303	Orphans transcription factor OS=Zea mays OX=4577 GN=100383303 PE=2 SV=1 - [C0PEY1_MAIZE]	55.7624	7.10791	0.640713	0.0438837
A0A0H4NWV3	Reticulon-like protein		Reticulon-like protein OS=Zea mays OX=4577 PE=4 SV=1 - [A0A0H4NWV3_MAIZE]	24.3932	9.42236	0.640333	0.00800499
B4FDX5	Uncharacterized protein		Uncharacterized protein OS=Zea mays OX=4577 PE=2 SV=1 - [B4FDX5_MAIZE]	21.3027	8.35303	0.639294	0.0277881
B6STA5	Glycine-rich RNA-binding protein 2	ZEAMMB73_Zm00001d031168	Glycine-rich RNA-binding protein 2 OS=Zea mays OX=4577 GN=ZEAMMB73_Zm00001d031168 PE=2 SV=1 - [B6STA5_MAIZE]	15.418	6.55127	0.636627	0.0136554
A0A1D6IPI9	PWWP domain containing protein	ZEAMMB73_Zm00001d022587	PWWP domain containing protein OS=Zea mays OX=4577 GN=ZEAMMB73_Zm00001d022587 PE=4 SV=1 - [A0A1D6IPI9_MAIZE]	54.9073	5.8335	0.634334	0.000724974
A0A1D6NHA1	Transducin/WD40 repeat-like superfamily protein	100384414	Transducin/WD40 repeat-like superfamily protein OS=Zea mays OX=4577 GN=100384414 PE=4 SV=1 - [A0A1D6NHA1_MAIZE]	145.797	6.96143	0.634065	0.00822135
A0A1D6QDB3	Chaperonin10	100383971	Chaperonin10 OS=Zea mays OX=4577 GN=100383971 PE=3 SV=1 - [A0A1D6QDB3_MAIZE]	24.7931	6.0874	0.632448	0.0106374
A0A1D6G762	Sister chromatid cohesion 1 protein 4	103636402	Sister chromatid cohesion 1 protein 4 OS=Zea mays OX=4577 GN=103636402 PE=4 SV=1 - [A0A1D6G762_MAIZE]	50.3024	4.44971	0.63152	0.000550919
B7ZZT5	Thymidylate kinase	103647875	Thymidylate kinase OS=Zea mays OX=4577 GN=103647875 PE=2 SV=1 - [B7ZZT5_MAIZE]	27.9664	9.01221	0.62919	0.000142212
B6T484	Mitogen-activated protein kinase	542144	Mitogen-activated protein kinase OS=Zea mays OX=4577 GN=542144 PE=2 SV=1 - [B6T484_MAIZE]	42.3065	6.53662	0.623154	0.0132576
A0A1D6M5X8	Uncharacterized protein	ZEAMMB73_Zm00001d038382	Uncharacterized protein OS=Zea mays OX=4577 GN=ZEAMMB73_Zm00001d038382 PE=4 SV=1 - [A0A1D6M5X8_MAIZE]	16.4144	8.42627	0.619716	0.000480923
A0A1D6LIJ7	Vacuolar sorting protein 39	100382909	Vacuolar sorting protein 39 OS=Zea mays OX=4577 GN=100382909 PE=4 SV=1 - [A0A1D6LIJ7_MAIZE]	103.244	5.33838	0.616709	0.0444904
B6T4Q9	ATP binding protein	100192758	ATP binding protein OS=Zea mays OX=4577 GN=100192758 PE=2 SV=1 - [B6T4Q9_MAIZE]	41.0395	7.29834	0.614389	0.00916357
B4F8R2	Mannan endo-14-beta-mannosidase 2	100191416	Mannan endo-14-beta-mannosidase 2 OS=Zea mays OX=4577 GN=100191416 PE=2 SV=1 - [B4F8R2_MAIZE]	50.9036	7.45947	0.61144	0.00592809
A0A1D6QEK1	p-loop containing nucleoside triphosphate hydrolase superfamily protein	ZEAMMB73_Zm00001d052248	p-loop containing nucleoside triphosphate hydrolase superfamily protein OS=Zea mays OX=4577 GN=ZEAMMB73_Zm00001d052248 PE=4 SV=1 - [A0A1D6QEK1_MAIZE]	82.4106	5.5542	0.60655	0.033941
A0A1D6JNY8	4-coumarate--CoA ligase-like 7	100191850	4-coumarate--CoA ligase-like 7 OS=Zea mays OX=4577 GN=100191850 PE=4 SV=1 - [A0A1D6JNY8_MAIZE]	30.2333	7.6792	0.600153	0.036118
A0A1D6Q072	Uncharacterized protein	ZEAMMB73_Zm00001d050168	Uncharacterized protein OS=Zea mays OX=4577 GN=ZEAMMB73_Zm00001d050168 PE=4 SV=1 - [A0A1D6Q072_MAIZE]	15.5321	10.1401	0.595182	0.000833401
B6SLS5	Nuclear speckle RNA-binding protein A	100274945	Nuclear speckle RNA-binding protein A OS=Zea mays OX=4577 GN=100274945 PE=2 SV=1 - [B6SLS5_MAIZE]	10.3791	11.1948	0.593812	0.00393796
A0A1D6LKP7	Root cap protein1	ZEAMMB73_Zm00001d036091	Root cap protein1 OS=Zea mays OX=4577 GN=ZEAMMB73_Zm00001d036091 PE=3 SV=1 - [A0A1D6LKP7_MAIZE]	41.8082	7.43018	0.589526	0.000221387
B4FV46	Protein RALF-like 33	100276849	Protein RALF-like 33 OS=Zea mays OX=4577 GN=100276849 PE=2 SV=1 - [B4FV46_MAIZE]	11.709	8.85107	0.585798	0.0026692
A0A1D6DXG8	Eukaryotic translation initiation factor 3 subunit C	ZEAMMB73_Zm00001d002169	Eukaryotic translation initiation factor 3 subunit C OS=Zea mays OX=4577 GN=ZEAMMB73_Zm00001d002169 PE=3 SV=1 - [A0A1D6DXG8_MAIZE]	104.527	5.5542	0.585317	0.00315382
C0PFY0	ATP-dependent Clp protease proteolytic subunit	100284211	ATP-dependent Clp protease proteolytic subunit OS=Zea mays OX=4577 GN=100284211 PE=2 SV=1 - [C0PFY0_MAIZE]	27.7461	6.60986	0.580774	0.00313061
B4FBH2	Uncharacterized protein		Uncharacterized protein OS=Zea mays OX=4577 PE=2 SV=1 - [B4FBH2_MAIZE]	9.78419	10.4038	0.576119	0.00313649
A0A1D6HTK2	Peptidyl-prolyl cis-trans isomerase CYP63	100274576	Peptidyl-prolyl cis-trans isomerase CYP63 OS=Zea mays OX=4577 GN=100274576 PE=4 SV=1 - [A0A1D6HTK2_MAIZE]	71.1176	10.4478	0.575074	0.00129451
B4F975	PIF/Ping-Pong transposase family protein	100191551	PIF/Ping-Pong transposase family protein OS=Zea mays OX=4577 GN=100191551 PE=2 SV=1 - [B4F975_MAIZE]	61.0814	7.28369	0.573666	0.00955363
A0A1D6MF07	VHS domain-containing protein	103649541	VHS domain-containing protein OS=Zea mays OX=4577 GN=103649541 PE=4 SV=1 - [A0A1D6MF07_MAIZE]	71.8645	5.45264	0.570512	0.0249495
A0A1D6ECC4	Zinc finger CCCH domain-containing protein 41	ZEAMMB73_Zm00001d003922	Zinc finger CCCH domain-containing protein 41 OS=Zea mays OX=4577 GN=ZEAMMB73_Zm00001d003922 PE=4 SV=1 - [A0A1D6ECC4_MAIZE]	98.6629	8.36768	0.568672	0.0331192
A0A317YB68	RPM1-interacting protein 4	Zm00014a_031591	RPM1-interacting protein 4 OS=Zea mays OX=4577 GN=Zm00014a_031591 PE=4 SV=1 - [A0A317YB68_MAIZE]	23.5182	9.08545	0.568081	0.000240996
O48554	Glycine-rich RNA binding protein	GRP	Glycine-rich RNA binding protein OS=Zea mays OX=4577 GN=GRP PE=2 SV=1 - [O48554_MAIZE]	14.7188	6.11279	0.567503	0.0324168
A0A1D6MX14	Ankyrin repeat family protein	ZEAMMB73_Zm00001d041589	Ankyrin repeat family protein OS=Zea mays OX=4577 GN=ZEAMMB73_Zm00001d041589 PE=4 SV=1 - [A0A1D6MX14_MAIZE]	13.4188	6.1001	0.564979	0.0223606
A0A1D6P6X6	Expansin-B4	ZEAMMB73_Zm00001d047091	Expansin-B4 OS=Zea mays OX=4577 GN=ZEAMMB73_Zm00001d047091 PE=3 SV=1 - [A0A1D6P6X6_MAIZE]	29.6673	9.5542	0.560389	0.0307931
A0A1D6MLW6	Putative calcium-binding protein CML27	103649813	Putative calcium-binding protein CML27 OS=Zea mays OX=4577 GN=103649813 PE=4 SV=1 - [A0A1D6MLW6_MAIZE]	20.4805	4.62744	0.546382	0.00108701
A0A1D6I9P7	Hexosyltransferase	100192958	Hexosyltransferase OS=Zea mays OX=4577 GN=100192958 PE=3 SV=1 - [A0A1D6I9P7_MAIZE]	60.8653	9.05615	0.537768	0.00908984
A0A1D6P1L1	K(+) efflux antiporter 4	ZEAMMB73_Zm00001d046231	K(+) efflux antiporter 4 OS=Zea mays OX=4577 GN=ZEAMMB73_Zm00001d046231 PE=4 SV=1 - [A0A1D6P1L1_MAIZE]	46.4344	5.59229	0.529342	0.0128742
B4FVF9	CCAAT-DR1 transcription factor	CADR15	CCAAT-DR1 transcription factor OS=Zea mays OX=4577 GN=CADR15 PE=2 SV=1 - [B4FVF9_MAIZE]	19.0572	6.78564	0.522591	0.00127002
A0A1D6LVH7	Protein EXORDIUM	ZEAMMB73_Zm00001d037205	Protein EXORDIUM OS=Zea mays OX=4577 GN=ZEAMMB73_Zm00001d037205 PE=4 SV=1 - [A0A1D6LVH7_MAIZE]	34.3133	8.35303	0.517694	0.00639182
B8A090	ADP,ATP carrier protein 2, mitochondrial	ZEAMMB73_Zm00001d051685	ADP,ATP carrier protein 2, mitochondrial OS=Zea mays OX=4577 GN=ZEAMMB73_Zm00001d051685 PE=2 SV=1 - [B8A090_MAIZE]	42.3057	9.84717	0.495669	0.0195088
B4FQD7	60S ribosomal protein L27a-2		60S ribosomal protein L27a-2 OS=Zea mays OX=4577 PE=2 SV=1 - [B4FQD7_MAIZE]	16.0678	10.6821	0.489927	0.000530432
A0A317Y6J6	La-related protein 1B	Zm00014a_030681	La-related protein 1B OS=Zea mays OX=4577 GN=Zm00014a_030681 PE=4 SV=1 - [A0A317Y6J6_MAIZE]	49.1877	9.17334	0.488655	0.0113607
A0A1D6QV98	Senescence-associated protein DIN1	100281897	Senescence-associated protein DIN1 OS=Zea mays OX=4577 GN=100281897 PE=4 SV=1 - [A0A1D6QV98_MAIZE]	10.6683	6.50732	0.487038	0.0437718
A0A317Y4V1	Expansin-B4	EXPB4_1	Expansin-B4 OS=Zea mays OX=4577 GN=EXPB4_1 PE=3 SV=1 - [A0A317Y4V1_MAIZE]	29.4994	8.79248	0.486199	0.000619112
A0A1D6GS15	UTP:RNA uridylyltransferase 1	103626268	UTP:RNA uridylyltransferase 1 OS=Zea mays OX=4577 GN=103626268 PE=4 SV=1 - [A0A1D6GS15_MAIZE]	43.6756	8.1626	0.470556	0.00504297
B6SRA0	Uncharacterized protein		Uncharacterized protein OS=Zea mays OX=4577 PE=2 SV=1 - [B6SRA0_MAIZE]	6.31506	8.60205	0.46888	0.0168089
B8A0H2	Uncharacterized protein		Uncharacterized protein OS=Zea mays OX=4577 PE=2 SV=1 - [B8A0H2_MAIZE]	32.9108	4.53857	0.446564	0.00458081
P80616	Probable S-adenosylmethionine synthase (Fragment)	METK	Probable S-adenosylmethionine synthase (Fragment) OS=Zea mays OX=4577 GN=METK PE=1 SV=1 - [METK_MAIZE]	1.59971	4.7417	0.846951	0.00891136
B4G0K5	Uncharacterized protein		Uncharacterized protein OS=Zea mays OX=4577 PE=2 SV=1 - [B4G0K5_MAIZE]	38.3706	6.80029	1.14692	0.00881742
A0A1Q0YML2	Glyceraldehyde-3-phosphate dehydrogenase	ZEAMMB73_Zm00001d051001	Glyceraldehyde-3-phosphate dehydrogenase OS=Zea mays OX=4577 GN=ZEAMMB73_Zm00001d051001 PE=3 SV=1 - [A0A1Q0YML2_MAIZE]	36.4258	7.47412	1.15385	0.0476975
A0A317Y5T2	Proteasome subunit alpha type	PAE1_1	Proteasome subunit alpha type OS=Zea mays OX=4577 GN=PAE1_1 PE=3 SV=1 - [A0A317Y5T2_MAIZE]	25.4368	4.84326	0.90324	0.0165343
B4G080	Caffeoyl-CoA O-methyltransferase 1		Caffeoyl-CoA O-methyltransferase 1 OS=Zea mays OX=4577 PE=2 SV=1 - [B4G080_MAIZE]	27.3021	5.2749	0.919512	0.00445418
B6SMC7	40S ribosomal protein S29	100280803	40S ribosomal protein S29 OS=Zea mays OX=4577 GN=100280803 PE=2 SV=1 - [B6SMC7_MAIZE]	6.42412	9.90576	1.14189	0.01647
B6UE23	60S ribosomal protein L18a		60S ribosomal protein L18a OS=Zea mays OX=4577 PE=2 SV=1 - [B6UE23_MAIZE]	21.4591	10.6089	0.862537	0.0382821
A0A317Y448	Nucleoside diphosphate kinase 1	NDPK1	Nucleoside diphosphate kinase 1 OS=Zea mays OX=4577 GN=NDPK1 PE=3 SV=1 - [A0A317Y448_MAIZE]	16.5306	6.80029	0.877204	0.0416604
B6SIL7	Eukaryotic translation initiation factor 5A	ZEAMMB73_Zm00001d006760	Eukaryotic translation initiation factor 5A OS=Zea mays OX=4577 GN=ZEAMMB73_Zm00001d006760 PE=2 SV=1 - [B6SIL7_MAIZE]	17.4857	5.98584	1.17799	0.00479803
B8A068	S-adenosylmethionine synthase	100279822	S-adenosylmethionine synthase OS=Zea mays OX=4577 GN=100279822 PE=2 SV=1 - [B8A068_MAIZE]	43.0458	5.90967	1.14308	0.0215963
A0A1D6E530	Peroxidase	ZEAMMB73_Zm00001d002899	Peroxidase OS=Zea mays OX=4577 GN=ZEAMMB73_Zm00001d002899 PE=3 SV=1 - [A0A1D6E530_MAIZE]	35.4539	5.66846	0.885988	0.00279356
B6U726	Vesicle-associated membrane protein 711	ZEAMMB73_Zm00001d037483	Vesicle-associated membrane protein 711 OS=Zea mays OX=4577 GN=ZEAMMB73_Zm00001d037483 PE=2 SV=1 - [B6U726_MAIZE]	24.894	9.48096	0.89361	0.00804752
Q9LKL4	Lipoxygenase	LOX	Lipoxygenase OS=Zea mays OX=4577 GN=LOX PE=2 SV=1 - [Q9LKL4_MAIZE]	98.1024	6.7124	1.15596	0.00175904
B6TS22	O-methyltransferase ZRP4	100284287	O-methyltransferase ZRP4 OS=Zea mays OX=4577 GN=100284287 PE=2 SV=1 - [B6TS22_MAIZE]	39.1582	5.80811	0.974293	0.0261633
B6T9C0	Putative ATPase, V1 complex, subunit B protein isoform 1	100282598	Putative ATPase, V1 complex, subunit B protein isoform 1 OS=Zea mays OX=4577 GN=100282598 PE=2 SV=1 - [B6T9C0_MAIZE]	54.0275	5.18604	0.914697	0.0195822
A0A1D6NV83	Proteasome subunit beta	100194311	Proteasome subunit beta OS=Zea mays OX=4577 GN=100194311 PE=3 SV=1 - [A0A1D6NV83_MAIZE]	24.4051	8.23584	0.888251	0.00957652
B6SHY0	ATOZI1	100284990	ATOZI1 OS=Zea mays OX=4577 GN=100284990 PE=2 SV=1 - [B6SHY0_MAIZE]	8.55631	8.79248	1.13034	0.0381757
B6TRR4	60S ribosomal protein L36		60S ribosomal protein L36 OS=Zea mays OX=4577 PE=2 SV=1 - [B6TRR4_MAIZE]	16.2381	11.0923	1.13373	0.00405759
A0A1D6MQ48	Transcription factor Pur-alpha 1	100274069	Transcription factor Pur-alpha 1 OS=Zea mays OX=4577 GN=100274069 PE=4 SV=1 - [A0A1D6MQ48_MAIZE]	20.066	5.56689	1.12538	0.0138705
C0PE62	Uncharacterized protein		Uncharacterized protein OS=Zea mays OX=4577 PE=2 SV=1 - [C0PE62_MAIZE]	13.0069	5.05908	0.92446	0.029654
B6UCD2	Uncharacterized protein		Uncharacterized protein OS=Zea mays OX=4577 PE=2 SV=1 - [B6UCD2_MAIZE]	10.4532	6.13818	0.862129	0.0149985
B4FY74	Alpha/beta-Hydrolases superfamily protein	103653383	Alpha/beta-Hydrolases superfamily protein OS=Zea mays OX=4577 GN=103653383 PE=2 SV=1 - [B4FY74_MAIZE]	28.6386	6.78564	0.834773	0.0156058
A0A1D6F844	NAD(P)-binding Rossmann-fold superfamily protein	103648195	NAD(P)-binding Rossmann-fold superfamily protein OS=Zea mays OX=4577 GN=103648195 PE=4 SV=1 - [A0A1D6F844_MAIZE]	27.0719	7.92822	0.869085	0.0477809
O22424	40S ribosomal protein S4	RPS4	40S ribosomal protein S4 OS=Zea mays OX=4577 GN=RPS4 PE=2 SV=1 - [RS4_MAIZE]	29.9982	10.1548	0.876498	0.0110109
B4FMV6	Soluble inorganic pyrophosphatase 1	100272302	Soluble inorganic pyrophosphatase 1 OS=Zea mays OX=4577 GN=100272302 PE=2 SV=1 - [B4FMV6_MAIZE]	12.9135	5.12256	0.880506	0.00529004
B6UBZ9	Cytochrome b-c1 complex subunit 7	100383274	Cytochrome b-c1 complex subunit 7 OS=Zea mays OX=4577 GN=100383274 PE=2 SV=1 - [B6UBZ9_MAIZE]	14.7917	9.64209	0.855989	0.010895
B4FBM9	60S ribosomal protein L3	100192516	60S ribosomal protein L3 OS=Zea mays OX=4577 GN=100192516 PE=2 SV=1 - [B4FBM9_MAIZE]	44.5238	10.1108	1.19001	0.0230358
B4FNC9	Small ubiquitin-related modifier	100281934	Small ubiquitin-related modifier OS=Zea mays OX=4577 GN=100281934 PE=2 SV=1 - [B4FNC9_MAIZE]	10.9243	5.09717	0.835794	0.0062413
A0A1D6HL75	Ferredoxin--nitrite reductase chloroplastic	ZEAMMB73_Zm00001d018161	Ferredoxin--nitrite reductase chloroplastic OS=Zea mays OX=4577 GN=ZEAMMB73_Zm00001d018161 PE=4 SV=1 - [A0A1D6HL75_MAIZE]	67.3759	8.45557	1.1561	0.000111243
B4FCE2	Uncharacterized protein		Uncharacterized protein OS=Zea mays OX=4577 PE=2 SV=1 - [B4FCE2_MAIZE]	30.5808	7.34229	0.842489	0.00425707
B6TAJ3	Proteasome subunit alpha type	100282706	Proteasome subunit alpha type OS=Zea mays OX=4577 GN=100282706 PE=2 SV=1 - [B6TAJ3_MAIZE]	29.9969	5.2749	1.15205	0.0445667
A0A1D6GFP8	40S ribosomal protein S18	100273341	40S ribosomal protein S18 OS=Zea mays OX=4577 GN=100273341 PE=3 SV=1 - [A0A1D6GFP8_MAIZE]	15.1099	9.83252	1.14016	0.00172942
B6TRC0	Gibberellin receptor GID1L2		Gibberellin receptor GID1L2 OS=Zea mays OX=4577 PE=2 SV=1 - [B6TRC0_MAIZE]	35.5685	5.30029	0.899559	0.0353185
B4F980	Uncharacterized protein	100191555	Uncharacterized protein OS=Zea mays OX=4577 GN=100191555 PE=2 SV=1 - [B4F980_MAIZE]	12.4754	8.45557	0.872501	0.0417874
A0A1D6HN61	Leucine aminopeptidase 2 chloroplastic	ZEAMMB73_Zm00001d018370	Leucine aminopeptidase 2 chloroplastic OS=Zea mays OX=4577 GN=ZEAMMB73_Zm00001d018370 PE=3 SV=1 - [A0A1D6HN61_MAIZE]	61.839	7.72314	1.16165	0.0242377
B4F9T3	Uncharacterized protein		Uncharacterized protein OS=Zea mays OX=4577 PE=2 SV=1 - [B4F9T3_MAIZE]	33.2459	5.75732	0.863004	0.00459069
B6TF80	Germin-like protein subfamily 3 member 2		Germin-like protein subfamily 3 member 2 OS=Zea mays OX=4577 PE=2 SV=1 - [B6TF80_MAIZE]	24.3355	6.68311	0.919343	0.0437514
A0A1D6PUL7	Aconitate hydratase	100216599	Aconitate hydratase OS=Zea mays OX=4577 GN=100216599 PE=3 SV=1 - [A0A1D6PUL7_MAIZE]	98.3447	6.16357	1.12761	0.015295
B6UG51	Cytochrome b5 isoform E	ZEAMMB73_Zm00001d032442	Cytochrome b5 isoform E OS=Zea mays OX=4577 GN=ZEAMMB73_Zm00001d032442 PE=2 SV=1 - [B6UG51_MAIZE]	14.8284	5.30029	1.16106	0.0281827
B6SXW8	RuBisCO large subunit-binding protein subunit alpha	RUBA_0	RuBisCO large subunit-binding protein subunit alpha OS=Zea mays OX=4577 GN=RUBA_0 PE=2 SV=1 - [B6SXW8_MAIZE]	61.3618	5.2876	0.91326	0.0029392
B4FQS9	Trans-cinnamate 4-monooxygenase	100272801	Trans-cinnamate 4-monooxygenase OS=Zea mays OX=4577 GN=100272801 PE=2 SV=1 - [B4FQS9_MAIZE]	56.949	8.86572	1.16602	0.0380956
B4G286	40S ribosomal protein S18		40S ribosomal protein S18 OS=Zea mays OX=4577 PE=2 SV=1 - [B4G286_MAIZE]	17.6975	10.7407	1.08903	0.0197107
A0A1D6I6T8	Heat shock protein 90-2	100272368	Heat shock protein 90-2 OS=Zea mays OX=4577 GN=100272368 PE=3 SV=1 - [A0A1D6I6T8_MAIZE]	80.2239	5.10986	1.16389	0.0136739
B4FVB2	Elongation factor Tu	100273405	Elongation factor Tu OS=Zea mays OX=4577 GN=100273405 PE=2 SV=1 - [B4FVB2_MAIZE]	48.4533	6.55127	1.18649	0.0253615
B4FZU9	Dihydropyrimidine dehydrogenase (NADP(+)) chloroplastic	100274265	Dihydropyrimidine dehydrogenase (NADP(+)) chloroplastic OS=Zea mays OX=4577 GN=100274265 PE=2 SV=1 - [B4FZU9_MAIZE]	45.6441	6.45557	0.940929	0.0401697
B4G1W8	Myosin-like protein	100283029	Myosin-like protein OS=Zea mays OX=4577 GN=100283029 PE=2 SV=1 - [B4G1W8_MAIZE]	39.9223	6.22705	0.875024	0.00107005
B4FNF9	Putative aldo-keto reductase 4	100191240	Putative aldo-keto reductase 4 OS=Zea mays OX=4577 GN=100191240 PE=2 SV=1 - [B4FNF9_MAIZE]	35.6164	7.98682	0.873309	0.00581342
B6T856	L-lactate dehydrogenase	100282503	L-lactate dehydrogenase OS=Zea mays OX=4577 GN=100282503 PE=2 SV=1 - [B6T856_MAIZE]	38.373	7.02002	0.902277	0.0321041
B4FLX3	Uncharacterized conserved protein UCP022280	100276044	Uncharacterized conserved protein UCP022280 OS=Zea mays OX=4577 GN=100276044 PE=2 SV=1 - [B4FLX3_MAIZE]	12.0603	9.53955	0.893979	0.0386176
D2JSQ3	ATP synthase subunit 8	atp8	ATP synthase subunit 8 OS=Zea mays OX=4577 GN=atp8 PE=2 SV=1 - [D2JSQ3_MAIZE]	17.7983	9.84717	0.852643	0.0338944
A0A1D6GGM2	Retrovirus-related Pol polyprotein LINE-1	ZEAMMB73_Zm00001d013223	Retrovirus-related Pol polyprotein LINE-1 OS=Zea mays OX=4577 GN=ZEAMMB73_Zm00001d013223 PE=4 SV=1 - [A0A1D6GGM2_MAIZE]	13.8493	7.15186	0.950848	0.00435221
A0A1D6QPU0	Phosphoenolpyruvate carboxylase isoform 1	ZEAMMB73_Zm00001d053453	Phosphoenolpyruvate carboxylase isoform 1 OS=Zea mays OX=4577 GN=ZEAMMB73_Zm00001d053453 PE=3 SV=1 - [A0A1D6QPU0_MAIZE]	98.4466	6.58057	1.15335	0.00796302
A0A1D6H4H8	26S protease regulatory subunit 6B-like protein	100284233	26S protease regulatory subunit 6B-like protein OS=Zea mays OX=4577 GN=100284233 PE=3 SV=1 - [A0A1D6H4H8_MAIZE]	45.3264	6.07471	1.16152	0.000982317
K7VCN7	Uncharacterized protein	103636535	Uncharacterized protein OS=Zea mays OX=4577 GN=103636535 PE=4 SV=1 - [K7VCN7_MAIZE]	7.99415	9.40771	0.874609	0.00968826
A0A1D6EL68	ADP-ribosylation factor A1F	100280562	ADP-ribosylation factor A1F OS=Zea mays OX=4577 GN=100280562 PE=3 SV=1 - [A0A1D6EL68_MAIZE]	19.5822	7.50342	0.912395	0.0196755
C4J629	Uncharacterized protein		Uncharacterized protein OS=Zea mays OX=4577 PE=2 SV=1 - [C4J629_MAIZE]	35.3024	8.48486	0.852352	0.0329616
A0A1D6ESS5	Proteasome subunit beta type	100286342	Proteasome subunit beta type OS=Zea mays OX=4577 GN=100286342 PE=4 SV=1 - [A0A1D6ESS5_MAIZE]	19.3028	7.23975	0.870295	0.0291351
B6T3V1	Peroxidase	100282124	Peroxidase OS=Zea mays OX=4577 GN=100282124 PE=2 SV=1 - [B6T3V1_MAIZE]	35.665	8.17725	1.16257	0.0112103
B4FQI3	NADH dehydrogenase [ubiquinone] 1 alpha subcomplex subunit 13-A	100282224	NADH dehydrogenase [ubiquinone] 1 alpha subcomplex subunit 13-A OS=Zea mays OX=4577 GN=100282224 PE=2 SV=1 - [B4FQI3_MAIZE]	15.9632	9.36377	0.900541	0.0224581
C0P3H6	Uncharacterized protein		Uncharacterized protein OS=Zea mays OX=4577 PE=2 SV=1 - [C0P3H6_MAIZE]	14.1972	7.88428	1.13028	0.0227367
A0A1D6MR46	Coatomer subunit beta	100384840	Coatomer subunit beta OS=Zea mays OX=4577 GN=100384840 PE=4 SV=1 - [A0A1D6MR46_MAIZE]	94.6881	6.0874	1.18544	0.0224438
A0A1D6EJ84	Clathrin heavy chain	ZEAMMB73_Zm00001d005090	Clathrin heavy chain OS=Zea mays OX=4577 GN=ZEAMMB73_Zm00001d005090 PE=3 SV=1 - [A0A1D6EJ84_MAIZE]	179.986	5.49072	1.13559	0.00128664
A0A1D6QV67	60S ribosomal protein L9-1	100283325	60S ribosomal protein L9-1 OS=Zea mays OX=4577 GN=100283325 PE=4 SV=1 - [A0A1D6QV67_MAIZE]	18.3348	9.81787	0.861889	0.0154563
A0A1D6F5C3	Protein disulfide-isomerase	606410	Protein disulfide-isomerase OS=Zea mays OX=4577 GN=606410 PE=3 SV=1 - [A0A1D6F5C3_MAIZE]	49.5201	5.09717	0.891723	0.0149721
B6SIU4	Peroxidase	ZEAMMB73_Zm00001d040399	Peroxidase OS=Zea mays OX=4577 GN=ZEAMMB73_Zm00001d040399 PE=2 SV=1 - [B6SIU4_MAIZE]	36.4683	8.47021	1.11434	0.0272784
B4FUH2	Aspartate aminotransferase	100273311	Aspartate aminotransferase OS=Zea mays OX=4577 GN=100273311 PE=2 SV=1 - [B4FUH2_MAIZE]	50.1506	8.38232	1.09359	0.0149469
B6UHU1	Catalase	542369	Catalase OS=Zea mays OX=4577 GN=542369 PE=2 SV=1 - [B6UHU1_MAIZE]	56.7202	7.40088	0.905478	0.00305474
C0PA91	Uncharacterized protein		Uncharacterized protein OS=Zea mays OX=4577 PE=2 SV=1 - [C0PA91_MAIZE]	39.4386	8.70459	0.858229	0.0293924
A0A1D6NN07	DNA-damage-repair/toleration protein DRT102	ZEAMMB73_Zm00001d044548	DNA-damage-repair/toleration protein DRT102 OS=Zea mays OX=4577 GN=ZEAMMB73_Zm00001d044548 PE=4 SV=1 - [A0A1D6NN07_MAIZE]	32.9692	5.04639	0.880325	0.0319815
A0A1D6DUX3	26S proteasome non-ATPase regulatory subunit 7 homolog A	100274928	26S proteasome non-ATPase regulatory subunit 7 homolog A OS=Zea mays OX=4577 GN=100274928 PE=4 SV=1 - [A0A1D6DUX3_MAIZE]	32.4893	6.81494	1.16972	0.00852531
A0A317YCA1	Glycine-rich RNA-binding protein RZ1A	Zm00014a_019799	Glycine-rich RNA-binding protein RZ1A OS=Zea mays OX=4577 GN=Zm00014a_019799 PE=4 SV=1 - [A0A317YCA1_MAIZE]	21.7901	7.75244	0.852932	0.0174803
A0A1D6GK62	Proteasome subunit beta	ZEAMMB73_Zm00001d013505	Proteasome subunit beta OS=Zea mays OX=4577 GN=ZEAMMB73_Zm00001d013505 PE=3 SV=1 - [A0A1D6GK62_MAIZE]	21.5051	5.90967	0.913468	0.0412417
B4G1P9	3-N-debenzoyl-2-deoxytaxol N-benzoyltransferase	100284721	3-N-debenzoyl-2-deoxytaxol N-benzoyltransferase OS=Zea mays OX=4577 GN=100284721 PE=2 SV=1 - [B4G1P9_MAIZE]	45.9195	5.31299	1.09651	0.0445892
Q5GAU1	Putative alanine aminotransferase	C9009	Putative alanine aminotransferase OS=Zea mays OX=4577 GN=C9009 PE=4 SV=1 - [Q5GAU1_MAIZE]	56.4187	5.64307	0.955769	0.0475522
B6TQ98	Peroxisomal multifunctional enzyme type 2	100284127	Peroxisomal multifunctional enzyme type 2 OS=Zea mays OX=4577 GN=100284127 PE=2 SV=1 - [B6TQ98_MAIZE]	13.2141	9.46631	1.1977	0.00378124
A0A1D6IKV5	TolB protein-related	103633477	TolB protein-related OS=Zea mays OX=4577 GN=103633477 PE=4 SV=1 - [A0A1D6IKV5_MAIZE]	72.134	6.27783	0.861284	0.0168054
A0A1D6EFN9	Pyruvate dehydrogenase E1 component subunit alpha	100272834	Pyruvate dehydrogenase E1 component subunit alpha OS=Zea mays OX=4577 GN=100272834 PE=4 SV=1 - [A0A1D6EFN9_MAIZE]	46.3743	6.88818	0.849902	0.0199684
A0A1D6M9Z1	Ras-related protein RABG3f	100383121	Ras-related protein RABG3f OS=Zea mays OX=4577 GN=100383121 PE=4 SV=1 - [A0A1D6M9Z1_MAIZE]	20.4149	4.93213	0.876724	0.0311232
A0A1D6HDL5	Phenylalanine ammonia-lyase	100273579	Phenylalanine ammonia-lyase OS=Zea mays OX=4577 GN=100273579 PE=3 SV=1 - [A0A1D6HDL5_MAIZE]	77.3527	6.63916	1.12342	0.016826
C0HI51	Zn-dependent exopeptidase superfamily protein	100304311	Zn-dependent exopeptidase superfamily protein OS=Zea mays OX=4577 GN=100304311 PE=2 SV=1 - [C0HI51_MAIZE]	52.1664	6.7124	0.925521	0.014278
B4FT16	Vacuolar protein sorting 26	100282332	Vacuolar protein sorting 26 OS=Zea mays OX=4577 GN=100282332 PE=2 SV=1 - [B4FT16_MAIZE]	35.3112	7.32764	0.916572	0.00289702
A0A1D6K433	Peroxidase	103635381	Peroxidase OS=Zea mays OX=4577 GN=103635381 PE=3 SV=1 - [A0A1D6K433_MAIZE]	35.2747	7.31299	0.834118	0.0409011
B4FQS1	4,5-DOPA dioxygenase extradiol		4,5-DOPA dioxygenase extradiol OS=Zea mays OX=4577 PE=2 SV=1 - [B4FQS1_MAIZE]	29.3086	6.52197	0.852697	0.00887961
C0PC62	Uncharacterized protein		Uncharacterized protein OS=Zea mays OX=4577 PE=2 SV=1 - [C0PC62_MAIZE]	57.194	5.66846	1.18203	0.000373972
K7UQT7	Putative elongation factor 1-gamma 2	100284862	Putative elongation factor 1-gamma 2 OS=Zea mays OX=4577 GN=100284862 PE=4 SV=1 - [K7UQT7_MAIZE]	46.9209	6.80029	0.878694	0.00479693
B4FRD9	Eukaryotic translation initiation factor 3 subunit F	100272886	Eukaryotic translation initiation factor 3 subunit F OS=Zea mays OX=4577 GN=100272886 PE=2 SV=1 - [B4FRD9_MAIZE]	31.444	5.36377	0.866642	0.00754656
A0A1D6NDJ4	Malic enzyme	ZEAMMB73_Zm00001d043601	Malic enzyme OS=Zea mays OX=4577 GN=ZEAMMB73_Zm00001d043601 PE=3 SV=1 - [A0A1D6NDJ4_MAIZE]	65.4688	5.90967	0.878912	0.0162928
A0A1D6PJL0	Aconitate hydratase	100304315	Aconitate hydratase OS=Zea mays OX=4577 GN=100304315 PE=3 SV=1 - [A0A1D6PJL0_MAIZE]	106.723	6.75635	0.849952	0.00234708
A0A1D6DW07	D-3-phosphoglycerate dehydrogenase	103645840	D-3-phosphoglycerate dehydrogenase OS=Zea mays OX=4577 GN=103645840 PE=3 SV=1 - [A0A1D6DW07_MAIZE]	64.7555	7.21045	0.851681	0.0457344
Q9SPD7	Outer mitochondrial membrane protein porin	vdac2	Outer mitochondrial membrane protein porin OS=Zea mays OX=4577 GN=vdac2 PE=2 SV=1 - [Q9SPD7_MAIZE]	29.1599	8.11865	1.14715	0.0150422
B4FA06	APx4-Peroxisomal Ascorbate Peroxidase		APx4-Peroxisomal Ascorbate Peroxidase OS=Zea mays OX=4577 PE=2 SV=1 - [B4FA06_MAIZE]	31.6704	7.95752	0.910895	0.0445597
B6T8P9	Uncharacterized protein	100276325	Uncharacterized protein OS=Zea mays OX=4577 GN=100276325 PE=2 SV=1 - [B6T8P9_MAIZE]	16.137	6.52197	0.929112	0.0182775
B6T408	Uncharacterized protein	Zm00014a_008906	Uncharacterized protein OS=Zea mays OX=4577 GN=Zm00014a_008906 PE=2 SV=1 - [B6T408_MAIZE]	20.0209	6.59521	0.852195	0.00340662
A0A1D6J0P6	Tyrosyl-tRNA synthetase	100282839	Tyrosyl-tRNA synthetase OS=Zea mays OX=4577 GN=100282839 PE=3 SV=1 - [A0A1D6J0P6_MAIZE]	42.5434	7.07861	1.07295	0.0187458
A0A1D6E568	AP-4 complex subunit mu	103646175	AP-4 complex subunit mu OS=Zea mays OX=4577 GN=103646175 PE=3 SV=1 - [A0A1D6E568_MAIZE]	42.2177	6.96143	0.894084	0.000203432
A0A1D6Q2J6	Ribonuclease	100280237	Ribonuclease OS=Zea mays OX=4577 GN=100280237 PE=4 SV=1 - [A0A1D6Q2J6_MAIZE]	106.237	6.7417	0.890606	0.0345074
A0A1D6HD80	RAN GTPase-activating protein 2	ZEAMMB73_Zm00001d017239	RAN GTPase-activating protein 2 OS=Zea mays OX=4577 GN=ZEAMMB73_Zm00001d017239 PE=4 SV=1 - [A0A1D6HD80_MAIZE]	56.7959	4.70361	0.888901	0.0356963
A0A1D6HMS1	CAP (Cysteine-rich secretory proteins Antigen 5 and Pathogenesis-related 1 protein) superfamily protein	103627834	CAP (Cysteine-rich secretory proteins Antigen 5 and Pathogenesis-related 1 protein) superfamily protein OS=Zea mays OX=4577 GN=103627834 PE=3 SV=1 - [A0A1D6HMS1_MAIZE]	18.4022	9.84717	1.17131	0.0220885
B6TAA7	Chaperonin	100282681	Chaperonin OS=Zea mays OX=4577 GN=100282681 PE=2 SV=1 - [B6TAA7_MAIZE]	10.5709	7.25439	0.882164	0.0333796
B4F9M9	Isocitrate dehydrogenase [NADP]		Isocitrate dehydrogenase [NADP] OS=Zea mays OX=4577 PE=2 SV=1 - [B4F9M9_MAIZE]	45.399	6.39209	0.844936	0.01265
A0A1D6KS88	Alpha-galactosidase	ZEAMMB73_Zm00001d032605	Alpha-galactosidase OS=Zea mays OX=4577 GN=ZEAMMB73_Zm00001d032605 PE=3 SV=1 - [A0A1D6KS88_MAIZE]	38.5803	6.0874	1.11965	0.0117177
B6TZE6	Pectinesterase 31	100284984	Pectinesterase 31 OS=Zea mays OX=4577 GN=100284984 PE=2 SV=1 - [B6TZE6_MAIZE]	36.0918	7.95752	0.871091	0.015039
B4G1Q6	Uncharacterized protein		Uncharacterized protein OS=Zea mays OX=4577 PE=2 SV=1 - [B4G1Q6_MAIZE]	42.1479	5.8208	1.10665	0.0087975
A0A1D6LKL2	Zinc finger (C3HC4-type RING finger) family protein	ZEAMMB73_Zm00001d036072	Zinc finger (C3HC4-type RING finger) family protein OS=Zea mays OX=4577 GN=ZEAMMB73_Zm00001d036072 PE=4 SV=1 - [A0A1D6LKL2_MAIZE]	67.9381	6.59521	0.83343	0.0279484
A0A1D6LE55	Peroxidase	103628960	Peroxidase OS=Zea mays OX=4577 GN=103628960 PE=3 SV=1 - [A0A1D6LE55_MAIZE]	34.8252	5.50342	0.833946	0.0333524
C0PHH5	Dihydrolipoyl dehydrogenase	100383599	Dihydrolipoyl dehydrogenase OS=Zea mays OX=4577 GN=100383599 PE=2 SV=1 - [C0PHH5_MAIZE]	59.317	7.06396	0.895458	0.0046979
A0A1D6I6V3	ATP phosphoribosyltransferase 2 chloroplastic	ZEAMMB73_Zm00001d020908	ATP phosphoribosyltransferase 2 chloroplastic OS=Zea mays OX=4577 GN=ZEAMMB73_Zm00001d020908 PE=3 SV=1 - [A0A1D6I6V3_MAIZE]	44.1834	8.63135	0.860552	0.00939624
B4FD03	Aldolase superfamily protein	100192890	Aldolase superfamily protein OS=Zea mays OX=4577 GN=100192890 PE=2 SV=1 - [B4FD03_MAIZE]	42.8782	5.70654	0.83597	0.0094109
B4FRJ8	Uncharacterized protein		Uncharacterized protein OS=Zea mays OX=4577 PE=2 SV=1 - [B4FRJ8_MAIZE]	38.9349	5.47803	1.12877	0.0371482
B6U6S0	Ubiquitin domain containing 1	100285566	Ubiquitin domain containing 1 OS=Zea mays OX=4577 GN=100285566 PE=2 SV=1 - [B6U6S0_MAIZE]	12.5012	5.94775	0.942537	0.0482107
B4FH35	Peroxidase	100194008	Peroxidase OS=Zea mays OX=4577 GN=100194008 PE=2 SV=1 - [B4FH35_MAIZE]	35.6902	9.5249	0.883569	0.01482
A0A1D6KJ07	Aminoacylase-1	ZEAMMB73_Zm00001d031473	Aminoacylase-1 OS=Zea mays OX=4577 GN=ZEAMMB73_Zm00001d031473 PE=4 SV=1 - [A0A1D6KJ07_MAIZE]	48.9889	5.47803	0.928817	0.025999
A0A1D6H9K5	Mitochondrial import inner membrane translocase subunit Tim17/Tim22/Tim23 family protein	ZEAMMB73_Zm00001d016665	Mitochondrial import inner membrane translocase subunit Tim17/Tim22/Tim23 family protein OS=Zea mays OX=4577 GN=ZEAMMB73_Zm00001d016665 PE=4 SV=1 - [A0A1D6H9K5_MAIZE]	28.3407	9.70068	0.873877	0.0330531
A0A317YJZ7	Biotin synthase	BIO2_0	Biotin synthase OS=Zea mays OX=4577 GN=BIO2_0 PE=3 SV=1 - [A0A317YJZ7_MAIZE]	94.5476	5.80811	1.13044	0.0300376
B6TU84	Epoxide hydrolase 2		Epoxide hydrolase 2 OS=Zea mays OX=4577 PE=2 SV=1 - [B6TU84_MAIZE]	31.147	8.39697	0.946482	0.0376628
B6T2C2	Uncharacterized protein		Uncharacterized protein OS=Zea mays OX=4577 PE=2 SV=1 - [B6T2C2_MAIZE]	19.3519	7.98682	0.837055	0.0214986
A0A1D6Q540	RAN GTPase-activating protein 2	ZEAMMB73_Zm00001d051112	RAN GTPase-activating protein 2 OS=Zea mays OX=4577 GN=ZEAMMB73_Zm00001d051112 PE=4 SV=1 - [A0A1D6Q540_MAIZE]	56.1795	4.65283	0.909382	0.0427873
A0A1D6GPQ4	Heterogeneous nuclear ribonucleoprotein 1	100280293	Heterogeneous nuclear ribonucleoprotein 1 OS=Zea mays OX=4577 GN=100280293 PE=4 SV=1 - [A0A1D6GPQ4_MAIZE]	44.2205	6.65381	0.866789	0.0417186
A0A1D6DUM9	Zinc finger CCCH domain-containing protein 52	100192020	Zinc finger CCCH domain-containing protein 52 OS=Zea mays OX=4577 GN=100192020 PE=4 SV=1 - [A0A1D6DUM9_MAIZE]	24.255	9.24658	0.841116	0.0179189
A0A1D6NFJ2	Glutamate synthase 1 [NADH] chloroplastic	103651348	Glutamate synthase 1 [NADH] chloroplastic OS=Zea mays OX=4577 GN=103651348 PE=4 SV=1 - [A0A1D6NFJ2_MAIZE]	235.343	6.91748	1.04878	0.0424076
A0A1D6KMT8	7,8-dihydroneopterin aldolase	103643202	7,8-dihydroneopterin aldolase OS=Zea mays OX=4577 GN=103643202 PE=3 SV=1 - [A0A1D6KMT8_MAIZE]	14.6276	6.17627	0.835756	0.0175486
A0A1D6I3K9	Glycosyl hydrolase family 81 protein	100216714	Glycosyl hydrolase family 81 protein OS=Zea mays OX=4577 GN=100216714 PE=4 SV=1 - [A0A1D6I3K9_MAIZE]	81.9773	7.31299	0.876413	0.0339599
A0A1D6DZK4	Uncharacterized protein	ZEAMMB73_Zm00001d002325	Uncharacterized protein OS=Zea mays OX=4577 GN=ZEAMMB73_Zm00001d002325 PE=4 SV=1 - [A0A1D6DZK4_MAIZE]	208.607	4.65283	0.865402	0.0106542
A0A1D6IC26	Malic enzyme	100191942	Malic enzyme OS=Zea mays OX=4577 GN=100191942 PE=3 SV=1 - [A0A1D6IC26_MAIZE]	66.172	7.07861	0.915165	0.0114039
K7V8K5	Peroxidase	ZEAMMB73_Zm00001d045845	Peroxidase OS=Zea mays OX=4577 GN=ZEAMMB73_Zm00001d045845 PE=3 SV=1 - [K7V8K5_MAIZE]	35.3479	7.84033	0.839131	0.00542833
B4FSW8	Grx_S17-glutaredoxin subgroup II	100283390	Grx_S17-glutaredoxin subgroup II OS=Zea mays OX=4577 GN=100283390 PE=2 SV=1 - [B4FSW8_MAIZE]	54.0143	5.43994	1.12252	0.0347271
A0A1D6H8W7	Ubiquitin-activating enzyme E1 domain-containing protein 1	100282359	Ubiquitin-activating enzyme E1 domain-containing protein 1 OS=Zea mays OX=4577 GN=100282359 PE=4 SV=1 - [A0A1D6H8W7_MAIZE]	24.2401	5.17334	0.875611	0.019145
A0A1D6LVR6	DCD (Development and Cell Death) domain protein	100502502	DCD (Development and Cell Death) domain protein OS=Zea mays OX=4577 GN=100502502 PE=4 SV=1 - [A0A1D6LVR6_MAIZE]	34.935	9.48096	0.873247	0.00995186
C0P8K3	Uncharacterized protein		Uncharacterized protein OS=Zea mays OX=4577 PE=2 SV=1 - [C0P8K3_MAIZE]	48.1364	5.16064	0.847097	0.02491
B6U0Y0	Eukaryotic translation initiation factor 3 subunit K	100194334	Eukaryotic translation initiation factor 3 subunit K OS=Zea mays OX=4577 GN=100194334 PE=2 SV=1 - [B6U0Y0_MAIZE]	25.8203	5.37646	0.880551	0.0350474
A0A1D6LKE5	Serine/threonine-protein phosphatase 2A 65 kDa regulatory subunit A beta isoform	732740	Serine/threonine-protein phosphatase 2A 65 kDa regulatory subunit A beta isoform OS=Zea mays OX=4577 GN=732740 PE=4 SV=1 - [A0A1D6LKE5_MAIZE]	61.9882	5.04639	1.08438	0.0358595
B4FF27	Uncharacterized protein		Uncharacterized protein OS=Zea mays OX=4577 PE=2 SV=1 - [B4FF27_MAIZE]	40.7085	5.23682	0.889389	0.0404842
C0PKG4	Uncharacterized protein		Uncharacterized protein OS=Zea mays OX=4577 PE=2 SV=1 - [C0PKG4_MAIZE]	19.1103	5.33838	0.833634	0.0227832
A0A1D6FTB8	Gamma-glutamyl hydrolase 1	ZEAMMB73_Zm00001d010744	Gamma-glutamyl hydrolase 1 OS=Zea mays OX=4577 GN=ZEAMMB73_Zm00001d010744 PE=4 SV=1 - [A0A1D6FTB8_MAIZE]	37.8913	6.23975	1.10532	0.00148553
A0A1D6J4J8	Serine/arginine-rich splicing factor RS31A	542174	Serine/arginine-rich splicing factor RS31A OS=Zea mays OX=4577 GN=542174 PE=4 SV=1 - [A0A1D6J4J8_MAIZE]	20.6146	9.39307	1.10827	0.00876341
A0A1D6E7A7	Uncharacterized protein	ZEAMMB73_Zm00001d003186	Uncharacterized protein OS=Zea mays OX=4577 GN=ZEAMMB73_Zm00001d003186 PE=4 SV=1 - [A0A1D6E7A7_MAIZE]	40.2593	6.43018	1.04089	0.0305086
B6U2I9	Esterase PIR7B		Esterase PIR7B OS=Zea mays OX=4577 PE=2 SV=1 - [B6U2I9_MAIZE]	28.7355	6.37939	1.09134	0.0319506
B6SSV3	Fasciclin-like arabinogalactan protein 7	100281174	Fasciclin-like arabinogalactan protein 7 OS=Zea mays OX=4577 GN=100281174 PE=2 SV=1 - [B6SSV3_MAIZE]	28.0906	9.01221	0.866521	0.0312517
A0A1D6NJS4	Tetratricopeptide repeat (TPR)-containing protein	100274696	Tetratricopeptide repeat (TPR)-containing protein OS=Zea mays OX=4577 GN=100274696 PE=4 SV=1 - [A0A1D6NJS4_MAIZE]	98.5726	6.60986	1.05866	0.0282105
A0A1D6II57	Peroxidase	ZEAMMB73_Zm00001d021965	Peroxidase OS=Zea mays OX=4577 GN=ZEAMMB73_Zm00001d021965 PE=3 SV=1 - [A0A1D6II57_MAIZE]	34.2953	8.41162	0.837365	0.0301453
A0A1D6DVH7	Lipoxygenase	100037805	Lipoxygenase OS=Zea mays OX=4577 GN=100037805 PE=3 SV=1 - [A0A1D6DVH7_MAIZE]	77.3811	5.68115	1.08477	0.0249308
B6SJW3	Uncharacterized protein	100274833	Uncharacterized protein OS=Zea mays OX=4577 GN=100274833 PE=2 SV=1 - [B6SJW3_MAIZE]	33.893	9.5835	0.835834	0.0123684
A0A1D6PA97	Nucleolar protein NOP56-like protein	103639131	Nucleolar protein NOP56-like protein OS=Zea mays OX=4577 GN=103639131 PE=4 SV=1 - [A0A1D6PA97_MAIZE]	60.3054	8.80713	1.13574	0.0181577
B4FMA8	RNA-binding (RRM/RBD/RNP motifs) family protein	100217268	RNA-binding (RRM/RBD/RNP motifs) family protein OS=Zea mays OX=4577 GN=100217268 PE=2 SV=1 - [B4FMA8_MAIZE]	39.7521	8.90967	1.1575	0.0080517
A0A1D6KNU5	Temperature-induced lipocalin-1	100286188	Temperature-induced lipocalin-1 OS=Zea mays OX=4577 GN=100286188 PE=3 SV=1 - [A0A1D6KNU5_MAIZE]	16.029	7.98682	0.885229	0.0170792
A0A1D6LBF8	Protease Do-like 7	ZEAMMB73_Zm00001d034800	Protease Do-like 7 OS=Zea mays OX=4577 GN=ZEAMMB73_Zm00001d034800 PE=4 SV=1 - [A0A1D6LBF8_MAIZE]	25.1117	4.55127	1.11069	0.0163176
A0A1D6EJ56	Ubiquitin-activating enzyme E1 2	100382860	Ubiquitin-activating enzyme E1 2 OS=Zea mays OX=4577 GN=100382860 PE=3 SV=1 - [A0A1D6EJ56_MAIZE]	115.281	5.36377	0.839457	0.0120904
B8A0T6	Aspartate aminotransferase		Aspartate aminotransferase OS=Zea mays OX=4577 PE=2 SV=1 - [B8A0T6_MAIZE]	46.8285	7.15186	1.0715	0.0002014
A0A1D6FKG0	Aspartic proteinase A1	ZEAMMB73_Zm00001d009594	Aspartic proteinase A1 OS=Zea mays OX=4577 GN=ZEAMMB73_Zm00001d009594 PE=3 SV=1 - [A0A1D6FKG0_MAIZE]	46.0756	5.33838	0.88748	0.00432341
A0A1D6E051	Uncharacterized protein	100193046	Uncharacterized protein OS=Zea mays OX=4577 GN=100193046 PE=4 SV=1 - [A0A1D6E051_MAIZE]	12.4382	5.19873	0.855411	0.0192318
A0A1D6NEZ5	Serine/threonine-protein phosphatase	100381456	Serine/threonine-protein phosphatase OS=Zea mays OX=4577 GN=100381456 PE=3 SV=1 - [A0A1D6NEZ5_MAIZE]	20.6143	5.31299	0.879793	0.0404599
A0A1D6L4E5	Exoglucanase1	100191390	Exoglucanase1 OS=Zea mays OX=4577 GN=100191390 PE=4 SV=1 - [A0A1D6L4E5_MAIZE]	53.3254	9.0415	0.858716	0.0187002
A0A1D6MDV5	Carboxypeptidase	ZEAMMB73_Zm00001d039146	Carboxypeptidase OS=Zea mays OX=4577 GN=ZEAMMB73_Zm00001d039146 PE=3 SV=1 - [A0A1D6MDV5_MAIZE]	48.113	7.1665	0.878952	0.0205769
B4FJV4	Putative carboxylesterase 15	100281689	Putative carboxylesterase 15 OS=Zea mays OX=4577 GN=100281689 PE=2 SV=1 - [B4FJV4_MAIZE]	35.0182	5.79541	1.13634	0.00761924
A0A1D6NLJ1	Uncharacterized protein	ZEAMMB73_Zm00001d044412	Uncharacterized protein OS=Zea mays OX=4577 GN=ZEAMMB73_Zm00001d044412 PE=4 SV=1 - [A0A1D6NLJ1_MAIZE]	21.3528	8.77783	0.872277	0.00580478
B4FR90	Hyaluronan / mRNA binding family	100282553	Hyaluronan / mRNA binding family OS=Zea mays OX=4577 GN=100282553 PE=2 SV=1 - [B4FR90_MAIZE]	40.4388	5.84619	1.09163	0.0454376
A0A1D6GU11	EH domain-containing protein 1	100384394	EH domain-containing protein 1 OS=Zea mays OX=4577 GN=100384394 PE=3 SV=1 - [A0A1D6GU11_MAIZE]	61.3385	7.59131	1.12082	0.00259288
C0PNG2	Uncharacterized protein		Uncharacterized protein OS=Zea mays OX=4577 PE=2 SV=1 - [C0PNG2_MAIZE]	20.4841	7.37158	1.16515	0.0281575
B6T442	Putative ribosomal protein S11 mitochondrial	100282151	Putative ribosomal protein S11 mitochondrial OS=Zea mays OX=4577 GN=100282151 PE=2 SV=1 - [B6T442_MAIZE]	27.8985	11.2241	1.18543	0.0208506
B6TZN5	Uncharacterized protein		Uncharacterized protein OS=Zea mays OX=4577 PE=2 SV=1 - [B6TZN5_MAIZE]	10.5895	9.99365	0.836144	0.00475368
A0A1D6J3M6	Acetyl-coenzyme A carboxylase1	100037775	Acetyl-coenzyme A carboxylase1 OS=Zea mays OX=4577 GN=100037775 PE=4 SV=1 - [A0A1D6J3M6_MAIZE]	226.769	6.29053	1.11434	0.0206793
K7TNL9	Uncharacterized protein	ZEAMMB73_Zm00001d023865	Uncharacterized protein OS=Zea mays OX=4577 GN=ZEAMMB73_Zm00001d023865 PE=4 SV=1 - [K7TNL9_MAIZE]	27.4983	10.6235	1.13949	0.0112127
A0A1D6M9V3	Proline iminopeptidase	100272740	Proline iminopeptidase OS=Zea mays OX=4577 GN=100272740 PE=4 SV=1 - [A0A1D6M9V3_MAIZE]	27.9499	7.34229	1.17166	0.00630242
B6SU17	Phosphoglycerate mutase-like protein	100281287	Phosphoglycerate mutase-like protein OS=Zea mays OX=4577 GN=100281287 PE=2 SV=1 - [B6SU17_MAIZE]	31.8119	6.40479	1.0879	0.0266918
C0PCX3	Tryptophan--tRNA ligase cytoplasmic	At3g04600	Tryptophan--tRNA ligase cytoplasmic OS=Zea mays OX=4577 GN=At3g04600 PE=2 SV=1 - [C0PCX3_MAIZE]	46.1174	6.17627	1.10933	0.0262324
B6TCV9	LanC-like protein 2		LanC-like protein 2 OS=Zea mays OX=4577 PE=2 SV=1 - [B6TCV9_MAIZE]	44.4286	7.54736	0.839259	0.0275201
A0A1D6I0G7	Polyadenylate-binding protein	100381531	Polyadenylate-binding protein OS=Zea mays OX=4577 GN=100381531 PE=3 SV=1 - [A0A1D6I0G7_MAIZE]	68.1027	6.62451	0.857552	0.0020962
A0A1D6L706	rRNA N-glycosidase	103644149	rRNA N-glycosidase OS=Zea mays OX=4577 GN=103644149 PE=3 SV=1 - [A0A1D6L706_MAIZE]	58.1015	5.5542	1.1554	0.0245559
B4FR99	Acidic endochitinase	100272870	Acidic endochitinase OS=Zea mays OX=4577 GN=100272870 PE=2 SV=1 - [B4FR99_MAIZE]	32.5154	8.47021	1.04707	0.0291343
B4FQC4	Serine--tRNA ligase cytoplasmic	100272738	Serine--tRNA ligase cytoplasmic OS=Zea mays OX=4577 GN=100272738 PE=2 SV=1 - [B4FQC4_MAIZE]	51.8233	6.49365	0.885789	0.0430278
A0A1D6Q3U9	Glycerophosphodiester phosphodiesterase GDPDL3	100383563	Glycerophosphodiester phosphodiesterase GDPDL3 OS=Zea mays OX=4577 GN=100383563 PE=4 SV=1 - [A0A1D6Q3U9_MAIZE]	58.9075	6.3667	0.886901	0.0077202
B6SX61	Uncharacterized protein		Uncharacterized protein OS=Zea mays OX=4577 PE=2 SV=1 - [B6SX61_MAIZE]	9.29469	9.24658	0.857088	0.00579009
A0A1D6KR27	Prolyl carboxypeptidase like protein	100283354	Prolyl carboxypeptidase like protein OS=Zea mays OX=4577 GN=100283354 PE=4 SV=1 - [A0A1D6KR27_MAIZE]	56.0645	6.46826	0.834033	0.0109554
Q9ST24	ZmGR2b protein	ZmGR2b	ZmGR2b protein OS=Zea mays OX=4577 GN=ZmGR2b PE=2 SV=1 - [Q9ST24_MAIZE]	19.2975	4.77979	0.903794	0.0284905
B4FPP1	Thioredoxin family Trp26	100193621	Thioredoxin family Trp26 OS=Zea mays OX=4577 GN=100193621 PE=2 SV=1 - [B4FPP1_MAIZE]	22.604	5.05908	1.17581	0.0309499
B6STA4	Uncharacterized protein		Uncharacterized protein OS=Zea mays OX=4577 PE=2 SV=1 - [B6STA4_MAIZE]	10.1156	4.24658	0.840786	0.0289732
B4FZF3	Eukaryotic aspartyl protease family protein	100274178	Eukaryotic aspartyl protease family protein OS=Zea mays OX=4577 GN=100274178 PE=2 SV=1 - [B4FZF3_MAIZE]	44.7867	8.36768	0.877557	0.0365307
B6T3Z9	Small nuclear ribonucleoprotein-associated protein		Small nuclear ribonucleoprotein-associated protein OS=Zea mays OX=4577 PE=2 SV=1 - [B6T3Z9_MAIZE]	27.685	11.5024	0.928106	0.0107994
B4FBQ8	Cytochrome b-c1 complex subunit Rieske, mitochondrial	100192538	Cytochrome b-c1 complex subunit Rieske, mitochondrial OS=Zea mays OX=4577 GN=100192538 PE=2 SV=1 - [B4FBQ8_MAIZE]	29.6494	8.88037	0.859203	0.0228029
B4FQF7	Tetratricopeptide repeat (TPR)-like superfamily protein	100274920	Tetratricopeptide repeat (TPR)-like superfamily protein OS=Zea mays OX=4577 GN=100274920 PE=2 SV=1 - [B4FQF7_MAIZE]	45.73	6.56592	0.862064	0.0393443
A0A1D6ET42	Thioesterase/thiol ester dehydrase-isomerase superfamily protein	ZEAMMB73_Zm00001d006133	Thioesterase/thiol ester dehydrase-isomerase superfamily protein OS=Zea mays OX=4577 GN=ZEAMMB73_Zm00001d006133 PE=4 SV=1 - [A0A1D6ET42_MAIZE]	56.502	6.81494	1.07135	0.0387653
A0A1D6KZ64	Signal peptidase complex subunit 1	ZEAMMB73_Zm00001d033479	Signal peptidase complex subunit 1 OS=Zea mays OX=4577 GN=ZEAMMB73_Zm00001d033479 PE=4 SV=1 - [A0A1D6KZ64_MAIZE]	9.34408	10.1987	0.891845	0.023749
B4F8J8	Pyruvate kinase	100191365	Pyruvate kinase OS=Zea mays OX=4577 GN=100191365 PE=2 SV=1 - [B4F8J8_MAIZE]	57.2564	5.90967	0.885546	0.0212925
B6TYE1	Myosin-like protein	100284881	Myosin-like protein OS=Zea mays OX=4577 GN=100284881 PE=2 SV=1 - [B6TYE1_MAIZE]	34.3654	7.23975	0.871481	0.0065177
C4JA40	Phosphoribosylformylglycinamidine cyclo-ligase	100502295	Phosphoribosylformylglycinamidine cyclo-ligase OS=Zea mays OX=4577 GN=100502295 PE=2 SV=1 - [C4JA40_MAIZE]	40.8849	5.49072	0.920759	0.00125647
A0A1D6IDW0	Late embryogenesis abundant (LEA) hydroxyproline-rich glycoprotein family	103633250	Late embryogenesis abundant (LEA) hydroxyproline-rich glycoprotein family OS=Zea mays OX=4577 GN=103633250 PE=4 SV=1 - [A0A1D6IDW0_MAIZE]	22.8096	8.45557	1.17391	0.021633
A0A1D6F6B1	Aminopeptidase P1	100273786	Aminopeptidase P1 OS=Zea mays OX=4577 GN=100273786 PE=3 SV=1 - [A0A1D6F6B1_MAIZE]	68.1683	5.94775	0.861755	0.00644743
K7TLJ6	Valine--tRNA ligase mitochondrial 1	ZEAMMB73_Zm00001d024493	Valine--tRNA ligase mitochondrial 1 OS=Zea mays OX=4577 GN=ZEAMMB73_Zm00001d024493 PE=4 SV=1 - [K7TLJ6_MAIZE]	92.6559	5.41455	0.856918	0.000237282
C0PG78	Monocopper oxidase-like protein SKU5	100383470	Monocopper oxidase-like protein SKU5 OS=Zea mays OX=4577 GN=100383470 PE=2 SV=1 - [C0PG78_MAIZE]	65.7608	6.48096	0.912426	0.0213201
K7VP16	Protein RETICULATA-RELATED 3 chloroplastic	100276764	Protein RETICULATA-RELATED 3 chloroplastic OS=Zea mays OX=4577 GN=100276764 PE=4 SV=1 - [K7VP16_MAIZE]	34.9821	9.67139	0.852343	0.0200665
A0A1D6HV20	HIPL1 protein	ZEAMMB73_Zm00001d019089	HIPL1 protein OS=Zea mays OX=4577 GN=ZEAMMB73_Zm00001d019089 PE=4 SV=1 - [A0A1D6HV20_MAIZE]	72.3975	6.20166	0.842631	0.00646803
B4F7W8	Uncharacterized protein		Uncharacterized protein OS=Zea mays OX=4577 PE=2 SV=1 - [B4F7W8_MAIZE]	35.5772	9.5249	0.893099	0.00748341
B4FLA5	Protein SCO1 homolog 2 mitochondrial	ZEAMMB73_Zm00001d005662	Protein SCO1 homolog 2 mitochondrial OS=Zea mays OX=4577 GN=ZEAMMB73_Zm00001d005662 PE=2 SV=1 - [B4FLA5_MAIZE]	31.5402	8.27979	0.857402	0.0110601
A0A1D6QJ59	Ubiquitin family protein	ZEAMMB73_Zm00001d052721	Ubiquitin family protein OS=Zea mays OX=4577 GN=ZEAMMB73_Zm00001d052721 PE=4 SV=1 - [A0A1D6QJ59_MAIZE]	93.5381	5.30029	1.06712	0.0148023
A0A1D6P1A9	Beta-glucosidase 11	ZEAMMB73_Zm00001d046210	Beta-glucosidase 11 OS=Zea mays OX=4577 GN=ZEAMMB73_Zm00001d046210 PE=3 SV=1 - [A0A1D6P1A9_MAIZE]	12.7303	8.22119	0.863555	0.0428624
B6T575	1-acyl-sn-glycerol-3-phosphate acyltransferase PLS1		1-acyl-sn-glycerol-3-phosphate acyltransferase PLS1 OS=Zea mays OX=4577 PE=2 SV=1 - [B6T575_MAIZE]	42.5138	9.87646	0.861448	0.0214703
A0A1D6NK33	Protein ROOT HAIR DEFECTIVE 3	ZEAMMB73_Zm00001d044271	Protein ROOT HAIR DEFECTIVE 3 OS=Zea mays OX=4577 GN=ZEAMMB73_Zm00001d044271 PE=4 SV=1 - [A0A1D6NK33_MAIZE]	73.7299	6.03662	0.850581	0.0141683
B4FF86	Uncharacterized protein		Uncharacterized protein OS=Zea mays OX=4577 PE=2 SV=1 - [B4FF86_MAIZE]	43.7097	8.73389	0.922519	0.0138817
A0A1D6PYH2	Ubiquitin thioesterase otubain-like	ZEAMMB73_Zm00001d049873	Ubiquitin thioesterase otubain-like OS=Zea mays OX=4577 GN=ZEAMMB73_Zm00001d049873 PE=4 SV=1 - [A0A1D6PYH2_MAIZE]	30.2346	4.67822	0.90157	0.0042768
A0A1D6MYS9	Protein-tyrosine-phosphatase PTP1	ZEAMMB73_Zm00001d041854	Protein-tyrosine-phosphatase PTP1 OS=Zea mays OX=4577 GN=ZEAMMB73_Zm00001d041854 PE=4 SV=1 - [A0A1D6MYS9_MAIZE]	24.3351	7.45947	0.843944	0.0231971
A0A317Y855	Dolichyl-diphosphooligosaccharide--protein glycosyltransferase subunit 1	OST1A_1	Dolichyl-diphosphooligosaccharide--protein glycosyltransferase subunit 1 OS=Zea mays OX=4577 GN=OST1A_1 PE=3 SV=1 - [A0A317Y855_MAIZE]	70.0231	7.69385	1.10417	0.00562827
A0A1D6G3A9	Ras-related protein RABG3a	ZEAMMB73_Zm00001d011717	Ras-related protein RABG3a OS=Zea mays OX=4577 GN=ZEAMMB73_Zm00001d011717 PE=4 SV=1 - [A0A1D6G3A9_MAIZE]	21.4159	7.85498	0.836481	0.0437765
K7TZ89	Uncharacterized protein	103652828	Uncharacterized protein OS=Zea mays OX=4577 GN=103652828 PE=4 SV=1 - [K7TZ89_MAIZE]	18.3151	6.771	1.10736	0.0258607
B4FDU9	NDR1/HIN1-like 1	100193113	NDR1/HIN1-like 1 OS=Zea mays OX=4577 GN=100193113 PE=2 SV=1 - [B4FDU9_MAIZE]	23.11	8.76318	0.833439	0.00946719
A0A1D6I5W3	ARP protein (REF)	100381485	ARP protein (REF) OS=Zea mays OX=4577 GN=100381485 PE=4 SV=1 - [A0A1D6I5W3_MAIZE]	62.3511	8.00146	0.834264	0.0173939
B6SV28	Proline-rich protein		Proline-rich protein OS=Zea mays OX=4577 PE=2 SV=1 - [B6SV28_MAIZE]	59.3872	6.20166	0.861721	0.0278745
B6TIJ2	Acetylornithine deacetylase	100283456	Acetylornithine deacetylase OS=Zea mays OX=4577 GN=100283456 PE=2 SV=1 - [B6TIJ2_MAIZE]	49.1479	5.70654	0.923055	0.0451848
B6T5B2	CHCH domain containing protein		CHCH domain containing protein OS=Zea mays OX=4577 PE=2 SV=1 - [B6T5B2_MAIZE]	20.2836	9.1001	1.15255	0.0168658
B6TWE3	Uncharacterized protein		Uncharacterized protein OS=Zea mays OX=4577 PE=2 SV=1 - [B6TWE3_MAIZE]	19.1181	10.1548	1.10143	0.0418208
A0A1D6KAW3	Peroxidase	pod_1	Peroxidase OS=Zea mays OX=4577 GN=pod_1 PE=3 SV=1 - [A0A1D6KAW3_MAIZE]	35.9555	4.70361	0.872986	0.00510596
B4FBK8	3-ketoacyl-CoA thiolase 2 peroxisomal	100192501	3-ketoacyl-CoA thiolase 2 peroxisomal OS=Zea mays OX=4577 GN=100192501 PE=2 SV=1 - [B4FBK8_MAIZE]	47.9287	8.27979	0.893288	0.00490469
B4F7S5	Copper ion binding	100272832	Copper ion binding OS=Zea mays OX=4577 GN=100272832 PE=2 SV=1 - [B4F7S5_MAIZE]	29.1018	10.1987	1.19535	0.0133714
A0A1D6L739	Aldehyde oxidase1	ZEAMMB73_Zm00001d034387	Aldehyde oxidase1 OS=Zea mays OX=4577 GN=ZEAMMB73_Zm00001d034387 PE=4 SV=1 - [A0A1D6L739_MAIZE]	141.264	6.26514	1.08792	0.0122425
A0A1D6H2M1	Proteasome subunit beta type	100272320	Proteasome subunit beta type OS=Zea mays OX=4577 GN=100272320 PE=4 SV=1 - [A0A1D6H2M1_MAIZE]	21.4877	5.42725	0.885036	0.00458288
A0A317YGC0	Expansin-B4	Zm00014a_032967	Expansin-B4 OS=Zea mays OX=4577 GN=Zm00014a_032967 PE=3 SV=1 - [A0A317YGC0_MAIZE]	31.1461	7.88428	0.894747	0.0160029
B4FYH1	Peroxidase	100273989	Peroxidase OS=Zea mays OX=4577 GN=100273989 PE=2 SV=1 - [B4FYH1_MAIZE]	37.9119	6.37939	0.86972	0.0434655
A0A1D6KSQ7	Threonine--tRNA ligase mitochondrial 1	103643444	Threonine--tRNA ligase mitochondrial 1 OS=Zea mays OX=4577 GN=103643444 PE=3 SV=1 - [A0A1D6KSQ7_MAIZE]	84.4139	7.38623	0.960043	0.0190153
A0A1D6HL48	Phenylalanine--tRNA ligase alpha subunit cytoplasmic	ZEAMMB73_Zm00001d018147	Phenylalanine--tRNA ligase alpha subunit cytoplasmic OS=Zea mays OX=4577 GN=ZEAMMB73_Zm00001d018147 PE=4 SV=1 - [A0A1D6HL48_MAIZE]	54.2505	6.12549	0.877285	0.00256797
B6SHH4	Lysine--tRNA ligase		Lysine--tRNA ligase OS=Zea mays OX=4577 PE=2 SV=1 - [B6SHH4_MAIZE]	69.2368	6.30322	1.18599	0.0103479
A0A1D6H4R4	Prolyl oligopeptidase family protein	100381646	Prolyl oligopeptidase family protein OS=Zea mays OX=4577 GN=100381646 PE=3 SV=1 - [A0A1D6H4R4_MAIZE]	88.8657	6.48096	0.899756	0.0343821
B6TQY2	Serine/threonine-protein phosphatase 2A activator		Serine/threonine-protein phosphatase 2A activator OS=Zea mays OX=4577 PE=2 SV=1 - [B6TQY2_MAIZE]	41.9185	7.02002	1.02275	0.0438248
A0A1D6DVI8	Putative phosphoribosylformylglycinamidine synthase chloroplastic/mitochondrial	ZEAMMB73_Zm00001d002003	Putative phosphoribosylformylglycinamidine synthase chloroplastic/mitochondrial OS=Zea mays OX=4577 GN=ZEAMMB73_Zm00001d002003 PE=3 SV=1 - [A0A1D6DVI8_MAIZE]	146.438	5.59229	0.837581	0.0097909
A0A1D6KMS8	Vignain	ZEAMMB73_Zm00001d031971	Vignain OS=Zea mays OX=4577 GN=ZEAMMB73_Zm00001d031971 PE=3 SV=1 - [A0A1D6KMS8_MAIZE]	27.6722	5.63037	0.846152	0.00197024
B4FDI3	Mog1/PsbP/DUF1795-like photosystem II reaction center PsbP family protein	ZEAMMB73_Zm00001d003428	Mog1/PsbP/DUF1795-like photosystem II reaction center PsbP family protein OS=Zea mays OX=4577 GN=ZEAMMB73_Zm00001d003428 PE=2 SV=1 - [B4FDI3_MAIZE]	21.55	4.50049	0.84941	0.0117552
A0A1D6IYV8	26S proteasome non-ATPase regulatory subunit 1 homolog	ZEAMMB73_Zm00001d024342	26S proteasome non-ATPase regulatory subunit 1 homolog OS=Zea mays OX=4577 GN=ZEAMMB73_Zm00001d024342 PE=3 SV=1 - [A0A1D6IYV8_MAIZE]	106.992	5.30029	0.868858	0.0348901
A0A1D6I2Q6	Protein arginine N-methyltransferase 1.1	ZEAMMB73_Zm00001d020188	Protein arginine N-methyltransferase 1.1 OS=Zea mays OX=4577 GN=ZEAMMB73_Zm00001d020188 PE=3 SV=1 - [A0A1D6I2Q6_MAIZE]	15.9974	5.57959	1.09835	0.0400866
A0A1D6PF34	Senescence/dehydration-associated protein-related	100191434	Senescence/dehydration-associated protein-related OS=Zea mays OX=4577 GN=100191434 PE=4 SV=1 - [A0A1D6PF34_MAIZE]	45.6543	6.0874	0.916988	0.0151935
A0A1D6LWQ8	Ketose-bisphosphate aldolase class-II family protein	100280420	Ketose-bisphosphate aldolase class-II family protein OS=Zea mays OX=4577 GN=100280420 PE=4 SV=1 - [A0A1D6LWQ8_MAIZE]	141.723	6.1001	1.15458	0.0340688
A0A1D6Q3W4	Ribosomal RNA processing Brix domain protein	100284070	Ribosomal RNA processing Brix domain protein OS=Zea mays OX=4577 GN=100284070 PE=4 SV=1 - [A0A1D6Q3W4_MAIZE]	28.2846	9.27588	0.846927	0.0477021
K7VV41	Amidophosphoribosyltransferase	103635621	Amidophosphoribosyltransferase OS=Zea mays OX=4577 GN=103635621 PE=3 SV=1 - [K7VV41_MAIZE]	58.0577	7.26904	1.09577	0.0414611
A0A1D6F0H0	Pentatricopeptide repeat-containing protein mitochondrial	ZEAMMB73_Zm00001d006769	Pentatricopeptide repeat-containing protein mitochondrial OS=Zea mays OX=4577 GN=ZEAMMB73_Zm00001d006769 PE=4 SV=1 - [A0A1D6F0H0_MAIZE]	32.7972	6.78564	1.17725	0.0416462
C0PGE5	Nucleic acid-binding OB-fold-like protein	100281965	Nucleic acid-binding OB-fold-like protein OS=Zea mays OX=4577 GN=100281965 PE=2 SV=1 - [C0PGE5_MAIZE]	20.2433	7.89893	1.18113	0.0209432
A0A1D6E4T9	Putative beta-D-xylosidase 6	ZEAMMB73_Zm00001d002853	Putative beta-D-xylosidase 6 OS=Zea mays OX=4577 GN=ZEAMMB73_Zm00001d002853 PE=4 SV=1 - [A0A1D6E4T9_MAIZE]	82.5383	6.30322	0.83888	0.0260188
A0A1D6LCE8	Transducin/WD40 repeat-like superfamily protein	100382756	Transducin/WD40 repeat-like superfamily protein OS=Zea mays OX=4577 GN=100382756 PE=4 SV=1 - [A0A1D6LCE8_MAIZE]	46.8873	8.79248	1.07422	0.0169315
A0A1D6GPB2	Peptide-N4-(N-acetyl-beta-glucosaminyl)asparagine amidase A protein	ZEAMMB73_Zm00001d013995	Peptide-N4-(N-acetyl-beta-glucosaminyl)asparagine amidase A protein OS=Zea mays OX=4577 GN=ZEAMMB73_Zm00001d013995 PE=4 SV=1 - [A0A1D6GPB2_MAIZE]	69.7053	7.21045	1.17536	0.0440664
A0A1D6HXH9	DEAD-box ATP-dependent RNA helicase 5	100383160	DEAD-box ATP-dependent RNA helicase 5 OS=Zea mays OX=4577 GN=100383160 PE=4 SV=1 - [A0A1D6HXH9_MAIZE]	31.2372	7.26904	1.10881	0.018798
A0A1D6MXS7	Glutathione synthetase	ZEAMMB73_Zm00001d041710	Glutathione synthetase OS=Zea mays OX=4577 GN=ZEAMMB73_Zm00001d041710 PE=3 SV=1 - [A0A1D6MXS7_MAIZE]	43.7674	6.27783	0.917462	0.000318304
A0A1D6P7Q6	Uncharacterized protein	100276254	Uncharacterized protein OS=Zea mays OX=4577 GN=100276254 PE=4 SV=1 - [A0A1D6P7Q6_MAIZE]	27.5485	9.53955	0.88397	0.0148136
A0A1D6GZY9	Cleavage and polyadenylation specificity factor (CPSF) A subunit protein	100272422	Cleavage and polyadenylation specificity factor (CPSF) A subunit protein OS=Zea mays OX=4577 GN=100272422 PE=4 SV=1 - [A0A1D6GZY9_MAIZE]	131.173	5.69385	0.876442	0.0467623
A0A1D6QU24	Anthranilate phosphoribosyltransferase	103654959	Anthranilate phosphoribosyltransferase OS=Zea mays OX=4577 GN=103654959 PE=4 SV=1 - [A0A1D6QU24_MAIZE]	63.5196	7.26904	0.893507	0.0282589
K7TT54	Uncharacterized protein	103642150	Uncharacterized protein OS=Zea mays OX=4577 GN=103642150 PE=4 SV=1 - [K7TT54_MAIZE]	19.4345	5.92236	0.930675	0.00598494
B6TNI0	Uncharacterized protein	100277064	Uncharacterized protein OS=Zea mays OX=4577 GN=100277064 PE=2 SV=1 - [B6TNI0_MAIZE]	18.05	9.42236	1.06624	0.0380999
A0A1D6I2K7	Proton pump-interactor 1	103632614	Proton pump-interactor 1 OS=Zea mays OX=4577 GN=103632614 PE=4 SV=1 - [A0A1D6I2K7_MAIZE]	52.7539	9.12939	0.849615	0.0216079
B6TSW1	Shikimate dehydrogenase		Shikimate dehydrogenase OS=Zea mays OX=4577 PE=2 SV=1 - [B6TSW1_MAIZE]	57.9499	6.23975	0.871462	0.00158499
A0A1D6L6Q2	AP complex subunit sigma	ZEAMMB73_Zm00001d034337	AP complex subunit sigma OS=Zea mays OX=4577 GN=ZEAMMB73_Zm00001d034337 PE=3 SV=1 - [A0A1D6L6Q2_MAIZE]	15.5481	5.5542	0.842112	0.0476566
B4FGB4	Uncharacterized protein		Uncharacterized protein OS=Zea mays OX=4577 PE=2 SV=1 - [B4FGB4_MAIZE]	42.113	5.70654	0.837192	0.00569042
A0A1D6MV11	Sucrose transporter4	ZEAMMB73_Zm00001d041192	Sucrose transporter4 OS=Zea mays OX=4577 GN=ZEAMMB73_Zm00001d041192 PE=4 SV=1 - [A0A1D6MV11_MAIZE]	53.3368	8.52881	1.12356	0.0402302
C0PHA8	Uncharacterized protein		Uncharacterized protein OS=Zea mays OX=4577 PE=2 SV=1 - [C0PHA8_MAIZE]	30.6817	4.99561	1.17698	0.0014285
A0A1D6KBW7	Hsp20/alpha crystallin family protein	ZEAMMB73_Zm00001d030317	Hsp20/alpha crystallin family protein OS=Zea mays OX=4577 GN=ZEAMMB73_Zm00001d030317 PE=3 SV=1 - [A0A1D6KBW7_MAIZE]	20.1736	8.74854	0.940705	0.0248758
B6THV4	Alliin lyase		Alliin lyase OS=Zea mays OX=4577 PE=2 SV=1 - [B6THV4_MAIZE]	53.4752	6.32861	0.877208	0.0249852
B8A3I9	Uncharacterized protein		Uncharacterized protein OS=Zea mays OX=4577 PE=2 SV=1 - [B8A3I9_MAIZE]	40.5046	6.85889	0.905494	0.041474
A0A1D6FDW3	Uncharacterized protein	ZEAMMB73_Zm00001d008558	Uncharacterized protein OS=Zea mays OX=4577 GN=ZEAMMB73_Zm00001d008558 PE=4 SV=1 - [A0A1D6FDW3_MAIZE]	17.9217	10.4331	1.07887	0.00844911
A0A1D6PGX2	Methionine--tRNA ligase cytoplasmic	103639438	Methionine--tRNA ligase cytoplasmic OS=Zea mays OX=4577 GN=103639438 PE=3 SV=1 - [A0A1D6PGX2_MAIZE]	69.8525	8.14795	0.866038	0.00188535
C0PP57	Uncharacterized protein		Uncharacterized protein OS=Zea mays OX=4577 PE=2 SV=1 - [C0PP57_MAIZE]	50.1861	5.50342	0.878096	0.030916
B4FB95	Peroxidase		Peroxidase OS=Zea mays OX=4577 PE=2 SV=1 - [B4FB95_MAIZE]	35.5793	7.40088	1.09442	0.0159307
K7UCA4	Myosin heavy chain-related	ZEAMMB73_Zm00001d049764	Myosin heavy chain-related OS=Zea mays OX=4577 GN=ZEAMMB73_Zm00001d049764 PE=4 SV=1 - [K7UCA4_MAIZE]	50.8652	9.56885	1.08653	0.0154533
A0A1D6P0F0	HGA4	100282802	HGA4 OS=Zea mays OX=4577 GN=100282802 PE=4 SV=1 - [A0A1D6P0F0_MAIZE]	51.3444	8.1333	0.9745	0.0264069
A0A1D6Q002	Putative sucrose-phosphate synthase family protein isoform 1	100384028	Putative sucrose-phosphate synthase family protein isoform 1 OS=Zea mays OX=4577 GN=100384028 PE=3 SV=1 - [A0A1D6Q002_MAIZE]	104.322	6.3667	1.16029	0.0304378
B6TVN1	BCAS2 protein		BCAS2 protein OS=Zea mays OX=4577 PE=2 SV=1 - [B6TVN1_MAIZE]	28.9925	5.93506	0.852172	0.0179987
A0A1D6EC22	Glycine--tRNA ligase mitochondrial 1	100192538	Glycine--tRNA ligase mitochondrial 1 OS=Zea mays OX=4577 GN=100192538 PE=4 SV=1 - [A0A1D6EC22_MAIZE]	75.9088	6.59521	1.14593	0.00507168
C4JB85	Cytochrome P450 family 96 subfamily A polypeptide 1	ZEAMMB73_Zm00001d008837	Cytochrome P450 family 96 subfamily A polypeptide 1 OS=Zea mays OX=4577 GN=ZEAMMB73_Zm00001d008837 PE=2 SV=1 - [C4JB85_MAIZE]	56.8094	8.55811	0.896306	0.0256702
A0A1D6HA35	NDR1/HIN1-like 1	ZEAMMB73_Zm00001d016733	NDR1/HIN1-like 1 OS=Zea mays OX=4577 GN=ZEAMMB73_Zm00001d016733 PE=4 SV=1 - [A0A1D6HA35_MAIZE]	20.3237	8.86572	0.874736	0.0046149
A0A1D6PWV6	COP9 signalosome complex subunit 3	ZEAMMB73_Zm00001d049652	COP9 signalosome complex subunit 3 OS=Zea mays OX=4577 GN=ZEAMMB73_Zm00001d049652 PE=4 SV=1 - [A0A1D6PWV6_MAIZE]	46.5426	6.06201	0.90606	0.0494456
A0A1D6FF40	Ubiquitinyl hydrolase 1	100383086	Ubiquitinyl hydrolase 1 OS=Zea mays OX=4577 GN=100383086 PE=3 SV=1 - [A0A1D6FF40_MAIZE]	64.9626	5.37646	1.14757	0.0445852
B6SWS8	DNA helicase		DNA helicase OS=Zea mays OX=4577 PE=2 SV=1 - [B6SWS8_MAIZE]	93.907	6.72705	0.833689	0.0281559
A0A1D6DST5	K(+) efflux antiporter 2 chloroplastic	103645748	K(+) efflux antiporter 2 chloroplastic OS=Zea mays OX=4577 GN=103645748 PE=4 SV=1 - [A0A1D6DST5_MAIZE]	106.143	5.19873	0.904023	0.0276618
A0A317Y4B4	Uncharacterized protein	Zm00014a_014141	Uncharacterized protein OS=Zea mays OX=4577 GN=Zm00014a_014141 PE=4 SV=1 - [A0A317Y4B4_MAIZE]	41.1809	4.84326	0.907476	0.0300956
A0A1D6JJP0	GroES-like zinc-binding alcohol dehydrogenase family protein	103630457	GroES-like zinc-binding alcohol dehydrogenase family protein OS=Zea mays OX=4577 GN=103630457 PE=4 SV=2 - [A0A1D6JJP0_MAIZE]	39.4364	8.17725	0.844709	0.044565
A0A1D6IKW3	DExH-box ATP-dependent RNA helicase DExH12	103633484	DExH-box ATP-dependent RNA helicase DExH12 OS=Zea mays OX=4577 GN=103633484 PE=4 SV=1 - [A0A1D6IKW3_MAIZE]	246.673	5.89697	0.889348	0.0442025
K7U3U3	Eukaryotic aspartyl protease family protein	ZEAMMB73_Zm00001d025541	Eukaryotic aspartyl protease family protein OS=Zea mays OX=4577 GN=ZEAMMB73_Zm00001d025541 PE=3 SV=1 - [K7U3U3_MAIZE]	48.6043	6.03662	1.13875	0.0263531
A0A1D6LSV5	ATP/GTP-binding protein family	103629816	ATP/GTP-binding protein family OS=Zea mays OX=4577 GN=103629816 PE=4 SV=1 - [A0A1D6LSV5_MAIZE]	86.9207	8.49951	0.853942	0.00207692
A0A317YL57	Subtilisin-like protease SBT3.18	SBT3.18	Subtilisin-like protease SBT3.18 OS=Zea mays OX=4577 GN=SBT3.18 PE=4 SV=1 - [A0A317YL57_MAIZE]	143.075	6.771	0.921819	0.0455912
A0A1D6ML83	Protein SUPPRESSOR OF GENE SILENCING 3	ZEAMMB73_Zm00001d039815	Protein SUPPRESSOR OF GENE SILENCING 3 OS=Zea mays OX=4577 GN=ZEAMMB73_Zm00001d039815 PE=4 SV=1 - [A0A1D6ML83_MAIZE]	43.9447	5.74463	0.847447	0.0233456
A0A1D6PN70	DEAD-box ATP-dependent RNA helicase 40	ZEAMMB73_Zm00001d048632	DEAD-box ATP-dependent RNA helicase 40 OS=Zea mays OX=4577 GN=ZEAMMB73_Zm00001d048632 PE=3 SV=1 - [A0A1D6PN70_MAIZE]	71.9945	10.9019	0.922735	0.0289721
A0A1D6NER6	Putative phosphoethanolamine N-methyltransferase	103651303	Putative phosphoethanolamine N-methyltransferase OS=Zea mays OX=4577 GN=103651303 PE=4 SV=1 - [A0A1D6NER6_MAIZE]	56.8453	5.61768	0.840455	0.0406865
A0A1D6IKN7	Pectin acetylesterase	100274042	Pectin acetylesterase OS=Zea mays OX=4577 GN=100274042 PE=3 SV=1 - [A0A1D6IKN7_MAIZE]	27.1269	8.11865	1.18884	0.0109566
A0A1D6HFJ6	tRNA pseudouridine synthase	100283773	tRNA pseudouridine synthase OS=Zea mays OX=4577 GN=100283773 PE=3 SV=1 - [A0A1D6HFJ6_MAIZE]	48.9244	8.27979	0.855383	0.000551909
A0A1D6Q5P0	Alcohol dehydrogenase-like 6	100272578	Alcohol dehydrogenase-like 6 OS=Zea mays OX=4577 GN=100272578 PE=3 SV=1 - [A0A1D6Q5P0_MAIZE]	35.0296	8.04541	1.14468	0.0156623
A0A1D6K829	Late embryogenesis abundant (LEA) hydroxyproline-rich glycoprotein family	NHL3_0	Late embryogenesis abundant (LEA) hydroxyproline-rich glycoprotein family OS=Zea mays OX=4577 GN=NHL3_0 PE=4 SV=1 - [A0A1D6K829_MAIZE]	22.9653	10.4771	0.878232	0.0146398
A0A1D6N9K8	Polyphenol oxidase chloroplastic	103651121	Polyphenol oxidase chloroplastic OS=Zea mays OX=4577 GN=103651121 PE=4 SV=1 - [A0A1D6N9K8_MAIZE]	65.4951	7.97217	0.84367	0.00827606
C0PFM8	Protein RETICULATA-RELATED 3 chloroplastic	100383393	Protein RETICULATA-RELATED 3 chloroplastic OS=Zea mays OX=4577 GN=100383393 PE=2 SV=1 - [C0PFM8_MAIZE]	35.1172	9.71533	0.933878	0.0452869
B4FLG7	Triphosphate tunel metalloenzyme 3	100217115	Triphosphate tunel metalloenzyme 3 OS=Zea mays OX=4577 GN=100217115 PE=2 SV=1 - [B4FLG7_MAIZE]	23.5091	5.2749	1.16238	0.039895
A0A1D6GWG3	Protein FREE1	ZEAMMB73_Zm00001d014808	Protein FREE1 OS=Zea mays OX=4577 GN=ZEAMMB73_Zm00001d014808 PE=4 SV=1 - [A0A1D6GWG3_MAIZE]	40.1386	6.91748	1.18188	0.0396603
B4G050	S-adenosyl-L-methionine-dependent methyltransferase superfamily protein	100274302	S-adenosyl-L-methionine-dependent methyltransferase superfamily protein OS=Zea mays OX=4577 GN=100274302 PE=2 SV=1 - [B4G050_MAIZE]	31.6144	4.51318	0.885318	0.00178704
A0A1D6HF19	Chaperone protein dnaJ 3	100216704	Chaperone protein dnaJ 3 OS=Zea mays OX=4577 GN=100216704 PE=4 SV=1 - [A0A1D6HF19_MAIZE]	45.7745	6.88818	1.185	0.0217308
A0A1D6M369	Uncharacterized protein	103630318	Uncharacterized protein OS=Zea mays OX=4577 GN=103630318 PE=4 SV=1 - [A0A1D6M369_MAIZE]	86.7777	7.35693	0.835028	0.00723761
A0A1D6NKU7	SIT4 phosphatase-associated family protein	103652598	SIT4 phosphatase-associated family protein OS=Zea mays OX=4577 GN=103652598 PE=4 SV=1 - [A0A1D6NKU7_MAIZE]	48.8508	5.64307	1.12673	0.00985031
A0A1D6IF39	FAD/NAD(P)-binding oxidoreductase family protein	ZEAMMB73_Zm00001d021758	FAD/NAD(P)-binding oxidoreductase family protein OS=Zea mays OX=4577 GN=ZEAMMB73_Zm00001d021758 PE=4 SV=1 - [A0A1D6IF39_MAIZE]	26.2165	6.72705	0.850291	0.0326422
A0A1D6H6Q2	Metallopeptidase M24 family protein	ZEAMMB73_Zm00001d016311	Metallopeptidase M24 family protein OS=Zea mays OX=4577 GN=ZEAMMB73_Zm00001d016311 PE=3 SV=1 - [A0A1D6H6Q2_MAIZE]	46.394	6.29053	0.88564	0.0119662
K7U3F5	Exocyst complex component SEC5	103641640	Exocyst complex component SEC5 OS=Zea mays OX=4577 GN=103641640 PE=3 SV=1 - [K7U3F5_MAIZE]	123.031	5.89697	0.902127	0.0229859
C0P4U5	Uncharacterized protein	100382145	Uncharacterized protein OS=Zea mays OX=4577 GN=100382145 PE=2 SV=1 - [C0P4U5_MAIZE]	37.2985	6.94678	0.84337	0.0344495
A0A1D6FHK9	Putative beta-D-xylosidase 5	100280070	Putative beta-D-xylosidase 5 OS=Zea mays OX=4577 GN=100280070 PE=4 SV=1 - [A0A1D6FHK9_MAIZE]	66.7969	5.51611	1.18091	0.0419501
A0A1D6EXV7	Eukaryotic translation initiation factor 4G	103647746	Eukaryotic translation initiation factor 4G OS=Zea mays OX=4577 GN=103647746 PE=4 SV=1 - [A0A1D6EXV7_MAIZE]	194.017	7.76709	0.868458	0.0113548
A0A1D6K830	Translocase of chloroplast 120 chloroplastic	TOC120	Translocase of chloroplast 120 chloroplastic OS=Zea mays OX=4577 GN=TOC120 PE=4 SV=1 - [A0A1D6K830_MAIZE]	108.33	5.35107	0.989105	0.0356084
A0A1D6QQG4	Protein CLP1-like protein	100284798	Protein CLP1-like protein OS=Zea mays OX=4577 GN=100284798 PE=3 SV=1 - [A0A1D6QQG4_MAIZE]	29.8355	5.47803	0.873352	0.035746
A0A1D6LY56	Alkaline alpha galactosidase 2	ZEAMMB73_Zm00001d037480	Alkaline alpha galactosidase 2 OS=Zea mays OX=4577 GN=ZEAMMB73_Zm00001d037480 PE=4 SV=1 - [A0A1D6LY56_MAIZE]	90.5417	6.56592	0.845472	0.00936024
A0A1D6LHF3	E3 UFM1-protein ligase 1-like protein	103629212	E3 UFM1-protein ligase 1-like protein OS=Zea mays OX=4577 GN=103629212 PE=4 SV=1 - [A0A1D6LHF3_MAIZE]	68.3564	6.50732	0.889561	0.0142496
A0A1D6PNP9	AAA-type ATPase family protein	103652718	AAA-type ATPase family protein OS=Zea mays OX=4577 GN=103652718 PE=4 SV=1 - [A0A1D6PNP9_MAIZE]	81.8052	6.78564	0.933967	0.00465735
C0PKH8	Uncharacterized protein		Uncharacterized protein OS=Zea mays OX=4577 PE=2 SV=1 - [C0PKH8_MAIZE]	41.2804	5.24951	0.845515	0.0159876
A0A1D6PRM1	Trypsin family protein with PDZ domain	100277723	Trypsin family protein with PDZ domain OS=Zea mays OX=4577 GN=100277723 PE=4 SV=1 - [A0A1D6PRM1_MAIZE]	35.3201	7.62061	0.909947	0.0376895
A0A1D6GJK8	Protein CASP	103625954	Protein CASP OS=Zea mays OX=4577 GN=103625954 PE=4 SV=1 - [A0A1D6GJK8_MAIZE]	60.788	4.99561	0.934055	0.0245292
A0A1D6ED25	DnaJ domain	ZEAMMB73_Zm00001d004033	DnaJ domain OS=Zea mays OX=4577 GN=ZEAMMB73_Zm00001d004033 PE=4 SV=1 - [A0A1D6ED25_MAIZE]	73.2102	7.72314	1.19241	0.0477358
A0A317YJL5	GDSL esterase/lipase	Zm00014a_040838	GDSL esterase/lipase OS=Zea mays OX=4577 GN=Zm00014a_040838 PE=4 SV=1 - [A0A317YJL5_MAIZE]	41.5571	8.35303	0.857697	0.0393524
A0A1D6L054	HIPL1 protein	103643833	HIPL1 protein OS=Zea mays OX=4577 GN=103643833 PE=4 SV=1 - [A0A1D6L054_MAIZE]	70.2797	6.66846	0.841847	0.0271401
K7UAY1	Uncharacterized protein	ZEAMMB73_562811	Uncharacterized protein OS=Zea mays OX=4577 GN=ZEAMMB73_562811 PE=4 SV=1 - [K7UAY1_MAIZE]	134.967	5.73193	0.849713	0.0108526
A0A1D6LPV5	Peptidyl-prolyl cis-trans isomerase CYP59	ZEAMMB73_Zm00001d036620	Peptidyl-prolyl cis-trans isomerase CYP59 OS=Zea mays OX=4577 GN=ZEAMMB73_Zm00001d036620 PE=4 SV=1 - [A0A1D6LPV5_MAIZE]	51.3649	5.77002	1.17519	0.0119823
A0A1D6IP33	LON protease2	ZEAMMB73_Zm00001d022560	LON protease2 OS=Zea mays OX=4577 GN=ZEAMMB73_Zm00001d022560 PE=4 SV=1 - [A0A1D6IP33_MAIZE]	50.9326	6.20166	1.11657	0.0243025
A0A1D6KJ43	UvrB/uvrC motif family protein	ZEAMMB73_Zm00001d031489	UvrB/uvrC motif family protein OS=Zea mays OX=4577 GN=ZEAMMB73_Zm00001d031489 PE=4 SV=1 - [A0A1D6KJ43_MAIZE]	85.4347	4.77979	1.16252	0.0077438
B6U6R3	12-oxophytodienoate reductase 2		12-oxophytodienoate reductase 2 OS=Zea mays OX=4577 PE=2 SV=1 - [B6U6R3_MAIZE]	41.4116	5.49072	1.16131	0.0176798
C0PMF6	4-hydroxyphenylpyruvate dioxygenase		4-hydroxyphenylpyruvate dioxygenase OS=Zea mays OX=4577 PE=2 SV=1 - [C0PMF6_MAIZE]	45.1795	5.77002	0.898557	0.0340246
A0A1D6HQQ4	DDRGK domain-containing protein 1	100272547	DDRGK domain-containing protein 1 OS=Zea mays OX=4577 GN=100272547 PE=4 SV=1 - [A0A1D6HQQ4_MAIZE]	34.503	5.21143	0.862326	0.00540732
B4FNT8	Aldolase like	100272469	Aldolase like OS=Zea mays OX=4577 GN=100272469 PE=2 SV=1 - [B4FNT8_MAIZE]	37.4021	5.77002	1.19903	0.0161907
A0A1D6FSY4	Pseudouridine synthase family protein	100280058	Pseudouridine synthase family protein OS=Zea mays OX=4577 GN=100280058 PE=4 SV=1 - [A0A1D6FSY4_MAIZE]	57.105	7.34229	1.08895	0.02618
A0A1D6LJ42	Protein MEI2-like 5	103629361	Protein MEI2-like 5 OS=Zea mays OX=4577 GN=103629361 PE=4 SV=1 - [A0A1D6LJ42_MAIZE]	84.8379	6.59521	0.8478	4.55374e-05
A0A1D6ITR3	Serine/threonine-protein kinase STY46	ZEAMMB73_Zm00001d023510	Serine/threonine-protein kinase STY46 OS=Zea mays OX=4577 GN=ZEAMMB73_Zm00001d023510 PE=4 SV=1 - [A0A1D6ITR3_MAIZE]	45.2486	5.92236	0.867538	0.0183922
A0A1D6LXJ6	Proteasome activating protein 200	ZEAMMB73_Zm00001d037401	Proteasome activating protein 200 OS=Zea mays OX=4577 GN=ZEAMMB73_Zm00001d037401 PE=4 SV=1 - [A0A1D6LXJ6_MAIZE]	126.844	7.32764	1.16599	0.0212986
A0A1D6KXV7	Transferase	100194375	Transferase OS=Zea mays OX=4577 GN=100194375 PE=4 SV=1 - [A0A1D6KXV7_MAIZE]	44.3666	7.98682	1.10076	0.0246739
A0A1D6LEL6	Disease resistance RPP13-like protein 4	ZEAMMB73_Zm00001d035125	Disease resistance RPP13-like protein 4 OS=Zea mays OX=4577 GN=ZEAMMB73_Zm00001d035125 PE=3 SV=1 - [A0A1D6LEL6_MAIZE]	140.261	7.6792	0.845579	0.0254912
A0A1D6NZ54	Uncharacterized protein	100191511	Uncharacterized protein OS=Zea mays OX=4577 GN=100191511 PE=4 SV=1 - [A0A1D6NZ54_MAIZE]	67.9957	9.39307	0.915133	0.00640762
A0A1D6MFW1	Phosphoacetylglucosamine mutase	ZEAMMB73_Zm00001d039361	Phosphoacetylglucosamine mutase OS=Zea mays OX=4577 GN=ZEAMMB73_Zm00001d039361 PE=3 SV=1 - [A0A1D6MFW1_MAIZE]	67.7781	6.99072	0.904799	0.0344579
B4FTE5	FRIGIDA-like protein	100273178	FRIGIDA-like protein OS=Zea mays OX=4577 GN=100273178 PE=2 SV=1 - [B4FTE5_MAIZE]	68.3437	4.71631	0.908479	0.0196855
A0A1D6HS13	GYF domain-containing protein	103631932	GYF domain-containing protein OS=Zea mays OX=4577 GN=103631932 PE=4 SV=1 - [A0A1D6HS13_MAIZE]	89.4907	5.99854	0.934614	0.0257333
A0A1D6EE87	Cleavage and polyadenylation specificity factor subunit 1	ZEAMMB73_Zm00001d004154	Cleavage and polyadenylation specificity factor subunit 1 OS=Zea mays OX=4577 GN=ZEAMMB73_Zm00001d004154 PE=4 SV=1 - [A0A1D6EE87_MAIZE]	128.907	5.87158	0.892631	0.0177204
B6TIS2	Superoxide dismutase [Cu-Zn]	542722	Superoxide dismutase [Cu-Zn] OS=Zea mays OX=4577 GN=542722 PE=2 SV=1 - [B6TIS2_MAIZE]	11.7738	5.37646	1.09332	0.451578
A0A1D6N430	Aldolase1	542261	Aldolase1 OS=Zea mays OX=4577 GN=542261 PE=4 SV=1 - [A0A1D6N430_MAIZE]	13.8332	9.39307	1.13287	0.0701062
B6T4U8	Calmodulin	ZEAMMB73_Zm00001d035095	Calmodulin OS=Zea mays OX=4577 GN=ZEAMMB73_Zm00001d035095 PE=2 SV=1 - [B6T4U8_MAIZE]	16.5454	4.95752	0.960958	0.258248
Q29SB6	Pathogenesis-related protein 10	100192117	Pathogenesis-related protein 10 OS=Zea mays OX=4577 GN=100192117 PE=2 SV=1 - [Q29SB6_MAIZE]	16.9316	5.5415	1.31516	0.0638361
B6T056	Superoxide dismutase [Cu-Zn]	ZEAMMB73_Zm00001d022505	Superoxide dismutase [Cu-Zn] OS=Zea mays OX=4577 GN=ZEAMMB73_Zm00001d022505 PE=2 SV=1 - [B6T056_MAIZE]	15.0945	5.8335	1.07566	0.615721
A0A096SXU4	60S ribosomal protein L35a-2	ZEAMMB73_Zm00001d020201	60S ribosomal protein L35a-2 OS=Zea mays OX=4577 GN=ZEAMMB73_Zm00001d020201 PE=3 SV=1 - [A0A096SXU4_MAIZE]	12.8938	10.521	1.08288	0.147502
B4FHT1	Annexin	Ann6	Annexin OS=Zea mays OX=4577 GN=Ann6 PE=2 SV=1 - [B4FHT1_MAIZE]	35.3225	7.57666	1.10414	0.330426
A0A1D6NFC1	ATP synthase subunit beta	103651342	ATP synthase subunit beta OS=Zea mays OX=4577 GN=103651342 PE=3 SV=1 - [A0A1D6NFC1_MAIZE]	59.283	6.3667	0.937637	0.247439
K7TL05	General regulatory factor2	100279512	General regulatory factor2 OS=Zea mays OX=4577 GN=100279512 PE=3 SV=1 - [K7TL05_MAIZE]	29.6109	4.80518	0.94019	0.104298
A0A1D6GKL8	Glycine-rich RNA-binding, abscisic acid-inducible protein	100194217	Glycine-rich RNA-binding, abscisic acid-inducible protein OS=Zea mays OX=4577 GN=100194217 PE=4 SV=1 - [A0A1D6GKL8_MAIZE]	15.5431	5.60498	0.884545	0.0600384
B4FQ61	40S ribosomal protein S15a-1	100280177	40S ribosomal protein S15a-1 OS=Zea mays OX=4577 GN=100280177 PE=2 SV=1 - [B4FQ61_MAIZE]	14.7378	9.81787	1.00498	0.940028
B6TJ93	40S ribosomal protein S15a-1	100217251	40S ribosomal protein S15a-1 OS=Zea mays OX=4577 GN=100217251 PE=2 SV=1 - [B6TJ93_MAIZE]	14.7268	9.81787	1.04949	0.20013
B4FUK7	Hydroxyproline-rich glycoprotein family protein	ZEAMMB73_Zm00001d022421	Hydroxyproline-rich glycoprotein family protein OS=Zea mays OX=4577 GN=ZEAMMB73_Zm00001d022421 PE=2 SV=1 - [B4FUK7_MAIZE]	37.8574	7.18115	1.16519	0.0551298
A0A1D6KZK2	Cox19-like CHCH family protein	100283861	Cox19-like CHCH family protein OS=Zea mays OX=4577 GN=100283861 PE=4 SV=1 - [A0A1D6KZK2_MAIZE]	8.89617	6.25244	0.977419	0.627466
B4F9R4	60S ribosomal protein L2	100191681	60S ribosomal protein L2 OS=Zea mays OX=4577 GN=100191681 PE=2 SV=1 - [B4F9R4_MAIZE]	28.0848	11.0776	1.09726	0.328697
B4FPE4	V-type proton ATPase subunit G		V-type proton ATPase subunit G OS=Zea mays OX=4577 PE=2 SV=1 - [B4FPE4_MAIZE]	12.2273	6.12549	1.27685	0.0982617
B6T7L9	14-3-3-like protein		14-3-3-like protein OS=Zea mays OX=4577 PE=2 SV=1 - [B6T7L9_MAIZE]	29.4785	4.81787	1.05846	0.454998
B7ZYI0	14-3-3-like protein GF14-6	ZEAMMB73_Zm00001d003401	14-3-3-like protein GF14-6 OS=Zea mays OX=4577 GN=ZEAMMB73_Zm00001d003401 PE=2 SV=1 - [B7ZYI0_MAIZE]	29.6439	4.80518	1.01869	0.67415
B6U9S6	APx1-Cytosolic Ascorbate Peroxidase	POD1	APx1-Cytosolic Ascorbate Peroxidase OS=Zea mays OX=4577 GN=POD1 PE=2 SV=1 - [B6U9S6_MAIZE]	27.3539	5.98584	0.998531	0.969275
B6TM55	APx1-Cytosolic Ascorbate Peroxidase	103639279	APx1-Cytosolic Ascorbate Peroxidase OS=Zea mays OX=4577 GN=103639279 PE=2 SV=1 - [B6TM55_MAIZE]	27.2908	5.8335	0.964419	0.667701
B6SGY0	Subtilisin-chymotrypsin inhibitor CI-1B	100282452	Subtilisin-chymotrypsin inhibitor CI-1B OS=Zea mays OX=4577 GN=100282452 PE=2 SV=1 - [B6SGY0_MAIZE]	7.55689	5.05908	0.734801	0.105453
B4FI76	Adenylate kinase 4	100194305	Adenylate kinase 4 OS=Zea mays OX=4577 GN=100194305 PE=2 SV=1 - [B4FI76_MAIZE]	26.4418	7.41553	0.888902	0.0762134
B6SK03	Ubiquitin-conjugating enzyme E2 variant 1C	100279740	Ubiquitin-conjugating enzyme E2 variant 1C OS=Zea mays OX=4577 GN=100279740 PE=2 SV=1 - [B6SK03_MAIZE]	16.7603	6.93213	0.937387	0.0508449
C4JBR4	Uncharacterized protein		Uncharacterized protein OS=Zea mays OX=4577 PE=2 SV=1 - [C4JBR4_MAIZE]	22.5927	6.37939	0.990744	0.851588
B4FH44	Thioredoxin	ZEAMMB73_Zm00001d019034	Thioredoxin OS=Zea mays OX=4577 GN=ZEAMMB73_Zm00001d019034 PE=2 SV=1 - [B4FH44_MAIZE]	13.0737	6.66846	1.22342	0.128975
B4FRG1	14-3-3-like protein	542285	14-3-3-like protein OS=Zea mays OX=4577 GN=542285 PE=2 SV=1 - [B4FRG1_MAIZE]	29.2965	4.86865	0.946556	0.5598
B4FNQ8	Calmodulin	100272455	Calmodulin OS=Zea mays OX=4577 GN=100272455 PE=2 SV=1 - [B4FNQ8_MAIZE]	16.6285	5.14795	1.37886	0.0700156
C0PM74	Adenylate kinase 4	100384174	Adenylate kinase 4 OS=Zea mays OX=4577 GN=100384174 PE=2 SV=1 - [C0PM74_MAIZE]	26.3818	7.81104	1.04464	0.408328
B4FG39	Peroxidase	100193733	Peroxidase OS=Zea mays OX=4577 GN=100193733 PE=2 SV=1 - [B4FG39_MAIZE]	36.5808	7.85498	0.956211	0.577342
B4FEJ6	Actin depolymerizing factor3	ADF3_1	Actin depolymerizing factor3 OS=Zea mays OX=4577 GN=ADF3_1 PE=2 SV=1 - [B4FEJ6_MAIZE]	15.8899	5.66846	0.927938	0.477197
B4FSW2	Actin-depolymerizing factor 10	100280568	Actin-depolymerizing factor 10 OS=Zea mays OX=4577 GN=100280568 PE=2 SV=1 - [B4FSW2_MAIZE]	15.9039	5.66846	0.926175	0.163505
A0A1D6PD18	Ascorbate peroxidase-like protein	103644971	Ascorbate peroxidase-like protein OS=Zea mays OX=4577 GN=103644971 PE=3 SV=1 - [A0A1D6PD18_MAIZE]	11.2896	4.94482	1.09423	0.129073
B6SKN3	1,2-dihydroxy-3-keto-5-methylthiopentene dioxygenase	100216585	1,2-dihydroxy-3-keto-5-methylthiopentene dioxygenase OS=Zea mays OX=4577 GN=100216585 PE=2 SV=1 - [B6SKN3_MAIZE]	23.4515	5.19873	1.05095	0.538899
C0PHC0	Vacuolar proton pump3	542327	Vacuolar proton pump3 OS=Zea mays OX=4577 GN=542327 PE=2 SV=1 - [C0PHC0_MAIZE]	68.4038	5.51611	1.00253	0.852182
B4FD90	40S ribosomal protein S19	RPS19A_1	40S ribosomal protein S19 OS=Zea mays OX=4577 GN=RPS19A_1 PE=2 SV=1 - [B4FD90_MAIZE]	16.2556	9.99365	0.926203	0.541433
B4FRH8	Actin-7	100283878	Actin-7 OS=Zea mays OX=4577 GN=100283878 PE=2 SV=1 - [B4FRH8_MAIZE]	41.653	5.49072	1.0292	0.492526
B6TUR3	Uncharacterized protein		Uncharacterized protein OS=Zea mays OX=4577 PE=2 SV=1 - [B6TUR3_MAIZE]	8.58633	5.05908	0.983392	0.902082
C4JBS8	Glyceraldehyde-3-phosphate dehydrogenase	ZEAMMB73_Zm00001d049641	Glyceraldehyde-3-phosphate dehydrogenase OS=Zea mays OX=4577 GN=ZEAMMB73_Zm00001d049641 PE=2 SV=1 - [C4JBS8_MAIZE]	36.4717	6.96143	1.05869	0.493474
B4FAG0	dTDP-glucose dehydratase homolog csu219	100191862	dTDP-glucose dehydratase homolog csu219 OS=Zea mays OX=4577 GN=100191862 PE=2 SV=1 - [B4FAG0_MAIZE]	39.2853	7.60596	0.962679	0.753427
B6THU9	Peroxidase	100283382	Peroxidase OS=Zea mays OX=4577 GN=100283382 PE=2 SV=1 - [B6THU9_MAIZE]	35.3582	7.66455	0.944944	0.187483
B6TMC2	Uncharacterized protein		Uncharacterized protein OS=Zea mays OX=4577 PE=2 SV=1 - [B6TMC2_MAIZE]	4.49636	8.25049	1.13237	0.376702
B6TB39	Fructokinase-2		Fructokinase-2 OS=Zea mays OX=4577 PE=2 SV=1 - [B6TB39_MAIZE]	35.4649	5.57959	1.0759	0.170716
B4F9R6	60S ribosomal protein L18a		60S ribosomal protein L18a OS=Zea mays OX=4577 PE=2 SV=1 - [B4F9R6_MAIZE]	21.3513	10.4624	1.01703	0.217647
B4F8W6	UTP--glucose-1-phosphate uridylyltransferase		UTP--glucose-1-phosphate uridylyltransferase OS=Zea mays OX=4577 PE=2 SV=1 - [B4F8W6_MAIZE]	52.0564	5.42725	1.17849	0.248944
C0P4S1	Peroxidase	ZEAMMB73_Zm00001d040581	Peroxidase OS=Zea mays OX=4577 GN=ZEAMMB73_Zm00001d040581 PE=2 SV=1 - [C0P4S1_MAIZE]	38.0603	6.65381	1.08404	0.0517352
B6SHM7	40S ribosomal protein S7	RPS7_2	40S ribosomal protein S7 OS=Zea mays OX=4577 GN=RPS7_2 PE=2 SV=1 - [B6SHM7_MAIZE]	22.198	9.74463	0.968251	0.419609
B4FS99	ATP synthase subunit d, mitochondrial	ZEAMMB73_Zm00001d031825	ATP synthase subunit d, mitochondrial OS=Zea mays OX=4577 GN=ZEAMMB73_Zm00001d031825 PE=2 SV=1 - [B4FS99_MAIZE]	19.915	5.2876	0.903038	0.0680866
B4FMV3	V-type proton ATPase subunit G	100282544	V-type proton ATPase subunit G OS=Zea mays OX=4577 GN=100282544 PE=2 SV=1 - [B4FMV3_MAIZE]	12.2403	6.12549	1.51334	0.120184
A0A1D6MSC0	Peroxidase	ZEAMMB73_Zm00001d040702	Peroxidase OS=Zea mays OX=4577 GN=ZEAMMB73_Zm00001d040702 PE=3 SV=1 - [A0A1D6MSC0_MAIZE]	38.3322	7.13721	0.938958	0.251861
A0A1D6Q1G3	Uncharacterized protein	100275334	Uncharacterized protein OS=Zea mays OX=4577 GN=100275334 PE=4 SV=1 - [A0A1D6Q1G3_MAIZE]	10.1261	9.62744	0.985782	0.902798
C0HHU2	23-bisphosphoglycerate-independent phosphoglycerate mutase 1	100381658	23-bisphosphoglycerate-independent phosphoglycerate mutase 1 OS=Zea mays OX=4577 GN=100381658 PE=2 SV=1 - [C0HHU2_MAIZE]	60.2518	5.77002	0.997879	0.908631
C0PPD4	Uncharacterized protein		Uncharacterized protein OS=Zea mays OX=4577 PE=2 SV=1 - [C0PPD4_MAIZE]	20.0288	10.0376	0.886574	0.368282
B6TJ90	Multifunctional fusion protein		Multifunctional fusion protein OS=Zea mays OX=4577 PE=2 SV=1 - [B6TJ90_MAIZE]	20.0626	9.67139	1.01067	0.842103
B6T7B2	40S ribosomal protein S9-2	100282862	40S ribosomal protein S9-2 OS=Zea mays OX=4577 GN=100282862 PE=2 SV=1 - [B6T7B2_MAIZE]	22.418	10.3159	1.37021	0.0709522
C0PFK3	Proteasome subunit alpha type	PAA1_2	Proteasome subunit alpha type OS=Zea mays OX=4577 GN=PAA1_2 PE=2 SV=1 - [C0PFK3_MAIZE]	27.4001	6.55127	0.994923	0.76271
O04710	Peroxidase	ap1	Peroxidase OS=Zea mays OX=4577 GN=ap1 PE=2 SV=1 - [O04710_MAIZE]	37.751	5.70654	0.967306	0.667636
B4FKM1	Guanine nucleotide-binding protein beta subunit-like protein	100216946	Guanine nucleotide-binding protein beta subunit-like protein OS=Zea mays OX=4577 GN=100216946 PE=2 SV=1 - [B4FKM1_MAIZE]	36.214	6.60986	1.07937	0.209547
A0A1D6L3U6	Aluminum induced protein with YGL and LRDR motifs	103643996	Aluminum induced protein with YGL and LRDR motifs OS=Zea mays OX=4577 GN=103643996 PE=4 SV=1 - [A0A1D6L3U6_MAIZE]	26.8824	6.52197	1.05512	0.0760689
B8A046	Phenylalanine ammonia-lyase	542258	Phenylalanine ammonia-lyase OS=Zea mays OX=4577 GN=542258 PE=2 SV=1 - [B8A046_MAIZE]	75.4171	6.3667	1.08858	0.104229
B6T681	S-adenosylmethionine synthase		S-adenosylmethionine synthase OS=Zea mays OX=4577 PE=2 SV=1 - [B6T681_MAIZE]	42.5294	5.8208	1.34849	0.0833442
B6TQ08	Actin-1	103625937	Actin-1 OS=Zea mays OX=4577 GN=103625937 PE=2 SV=1 - [B6TQ08_MAIZE]	41.7699	5.49072	0.970285	0.666122
B4FCE3	Sm-like protein LSM6A	100192719	Sm-like protein LSM6A OS=Zea mays OX=4577 GN=100192719 PE=2 SV=1 - [B4FCE3_MAIZE]	10.0701	9.0708	0.922301	0.127108
B4FZZ2	Peptidyl-prolyl cis-trans isomerase	103627222	Peptidyl-prolyl cis-trans isomerase OS=Zea mays OX=4577 GN=103627222 PE=2 SV=1 - [B4FZZ2_MAIZE]	18.3501	8.68994	1.10961	0.21959
A0A1D6IKH3	Ribonuclease 1	ZEAMMB73_Zm00001d022228	Ribonuclease 1 OS=Zea mays OX=4577 GN=ZEAMMB73_Zm00001d022228 PE=3 SV=1 - [A0A1D6IKH3_MAIZE]	28.4829	7.06396	1.00676	0.90132
B6T281	40S ribosomal protein S14		40S ribosomal protein S14 OS=Zea mays OX=4577 PE=2 SV=1 - [B6T281_MAIZE]	16.3756	10.5503	0.965679	0.553595
B6SP36	NADH dehydrogenase [ubiquinone] 1 alpha subcomplex subunit 1	100501943	NADH dehydrogenase [ubiquinone] 1 alpha subcomplex subunit 1 OS=Zea mays OX=4577 GN=100501943 PE=2 SV=1 - [B6SP36_MAIZE]	7.20866	8.92432	1.05554	0.210788
B4FKA4	Uncharacterized protein	100216896	Uncharacterized protein OS=Zea mays OX=4577 GN=100216896 PE=2 SV=1 - [B4FKA4_MAIZE]	16.3537	10.5649	1.03291	0.873823
B6T6G1	60S ribosomal protein L12	100282351	60S ribosomal protein L12 OS=Zea mays OX=4577 GN=100282351 PE=2 SV=1 - [B6T6G1_MAIZE]	17.6906	8.96826	0.830061	0.0554848
B6TM00	60 ribosomal protein L14		60 ribosomal protein L14 OS=Zea mays OX=4577 PE=2 SV=1 - [B6TM00_MAIZE]	16.9115	10.4185	1.04588	0.579411
A0A1D6L2U8	Tubulin alpha chain	100037751	Tubulin alpha chain OS=Zea mays OX=4577 GN=100037751 PE=3 SV=1 - [A0A1D6L2U8_MAIZE]	45.8756	5.03369	1.11267	0.464628
B6TFS9	14-3-3-like protein A	100283215	14-3-3-like protein A OS=Zea mays OX=4577 GN=100283215 PE=2 SV=1 - [B6TFS9_MAIZE]	28.6043	4.94482	0.723747	0.117856
A0A1D6FAX1	Germin-like protein subfamily 2 member 1	ZEAMMB73_Zm00001d008210	Germin-like protein subfamily 2 member 1 OS=Zea mays OX=4577 GN=ZEAMMB73_Zm00001d008210 PE=3 SV=1 - [A0A1D6FAX1_MAIZE]	19.358	9.24658	1.32919	0.203432
B4FB66	40S ribosomal protein S5-2	100193240	40S ribosomal protein S5-2 OS=Zea mays OX=4577 GN=100193240 PE=2 SV=1 - [B4FB66_MAIZE]	22.1827	9.80322	1.0169	0.501664
Q43863	Annexin		Annexin OS=Zea mays OX=4577 PE=2 SV=2 - [Q43863_MAIZE]	35.5385	7.54736	1.01076	0.869555
B6SHX4	NADH ubiquinone oxidoreductase B22-like subunit	100282004	NADH ubiquinone oxidoreductase B22-like subunit OS=Zea mays OX=4577 GN=100282004 PE=2 SV=1 - [B6SHX4_MAIZE]	13.3458	8.42627	0.838004	0.0748855
A0A1D6EB22	Abscisic acid stress ripening3	ZEAMMB73_Zm00001d003712	Abscisic acid stress ripening3 OS=Zea mays OX=4577 GN=ZEAMMB73_Zm00001d003712 PE=4 SV=1 - [A0A1D6EB22_MAIZE]	27.7602	5.24951	1.16613	0.295627
F8UV61	Cell division cycle protein 48 (Fragment)		Cell division cycle protein 48 (Fragment) OS=Zea mays OX=4577 PE=2 SV=1 - [F8UV61_MAIZE]	85.758	5.32568	1.04445	0.104784
B6SHZ1	40S ribosomal protein S5	ZEAMMB73_Zm00001d008387	40S ribosomal protein S5 OS=Zea mays OX=4577 GN=ZEAMMB73_Zm00001d008387 PE=2 SV=1 - [B6SHZ1_MAIZE]	22.3528	9.77393	0.854736	0.104017
A0A0B4J303	Eukaryotic initiation factor4a	ZEAMMB73_Zm00001d036480	Eukaryotic initiation factor4a OS=Zea mays OX=4577 GN=ZEAMMB73_Zm00001d036480 PE=3 SV=1 - [A0A0B4J303_MAIZE]	46.9529	5.47803	0.977073	0.724718
A0A1D6JZU3	Pathogenesis-related protein 10	103634525	Pathogenesis-related protein 10 OS=Zea mays OX=4577 GN=103634525 PE=3 SV=1 - [A0A1D6JZU3_MAIZE]	16.8895	5.51611	1.31726	0.167059
Q2XX23	Non-specific lipid-transfer protein (Fragment)	plt1	Non-specific lipid-transfer protein (Fragment) OS=Zea mays subsp. parviglumis OX=76912 GN=plt1 PE=3 SV=1 - [Q2XX23_ZEAMP]	10.5722	8.51416	1.87547	0.190039
B6T3P9	Enolase		Enolase OS=Zea mays OX=4577 PE=2 SV=1 - [B6T3P9_MAIZE]	48.1005	5.8208	1.09865	0.165859
Q9FQC5	Glutathione S-transferase GST 14	541832	Glutathione S-transferase GST 14 OS=Zea mays OX=4577 GN=541832 PE=2 SV=1 - [Q9FQC5_MAIZE]	27.8274	8.57275	0.974298	0.536069
A0A1D6F3W8	V-type proton ATPase subunit F	100283470	V-type proton ATPase subunit F OS=Zea mays OX=4577 GN=100283470 PE=4 SV=1 - [A0A1D6F3W8_MAIZE]	11.5651	7.40088	0.973167	0.164894
B6TGG2	2,3-bisphosphoglycerate-independent phosphoglycerate mutase		2,3-bisphosphoglycerate-independent phosphoglycerate mutase OS=Zea mays OX=4577 PE=2 SV=1 - [B6TGG2_MAIZE]	60.6399	5.52881	1.15176	0.130666
P41040	Calmodulin	CALM1	Calmodulin OS=Zea mays OX=4577 GN=CALM1 PE=2 SV=2 - [CALM_MAIZE]	16.8009	4.27197	1.07422	0.679096
Q4FZ53	Cysteine proteinase inhibitor	cc3	Cysteine proteinase inhibitor OS=Zea mays OX=4577 GN=cc3 PE=2 SV=1 - [Q4FZ53_MAIZE]	12.3043	5.77002	0.973184	0.864155
K7TVZ1	6-phosphogluconate dehydrogenase, decarboxylating	100856973	6-phosphogluconate dehydrogenase, decarboxylating OS=Zea mays OX=4577 GN=100856973 PE=3 SV=1 - [K7TVZ1_MAIZE]	54.1338	6.72705	0.926957	0.100564
C0PHR4	Adenosylhomocysteinase	100282150	Adenosylhomocysteinase OS=Zea mays OX=4577 GN=100282150 PE=2 SV=1 - [C0PHR4_MAIZE]	53.2	5.89697	0.992782	0.778128
Q0GR44	ATP synthase subunit alpha	atp1	ATP synthase subunit alpha OS=Zea mays subsp. parviglumis OX=76912 GN=atp1 PE=3 SV=1 - [Q0GR44_ZEAMP]	55.1457	6.1001	0.99751	0.898569
B4FW18	40S ribosomal protein S28	100280891	40S ribosomal protein S28 OS=Zea mays OX=4577 GN=100280891 PE=2 SV=1 - [B4FW18_MAIZE]	7.45912	11.1655	1.0113	0.926576
B6SHT6	PVR3-like protein	100280885	PVR3-like protein OS=Zea mays OX=4577 GN=100280885 PE=2 SV=1 - [B6SHT6_MAIZE]	10.2829	8.49951	1.61952	0.0683342
A0A1D6H5Z9	Phosphoenolpyruvate carboxylase2	542479	Phosphoenolpyruvate carboxylase2 OS=Zea mays OX=4577 GN=542479 PE=4 SV=1 - [A0A1D6H5Z9_MAIZE]	49.1923	7.18115	0.976706	0.73127
C0PCV2	40S ribosomal protein S8		40S ribosomal protein S8 OS=Zea mays OX=4577 PE=2 SV=1 - [C0PCV2_MAIZE]	24.2951	10.3745	1.02881	0.430977
B4FF24	UDP-glucuronic acid decarboxylase 5	100193447	UDP-glucuronic acid decarboxylase 5 OS=Zea mays OX=4577 GN=100193447 PE=2 SV=1 - [B4FF24_MAIZE]	39.3013	7.94287	0.801615	0.134662
C0HHA6	Peroxidase	100276245	Peroxidase OS=Zea mays OX=4577 GN=100276245 PE=2 SV=1 - [C0HHA6_MAIZE]	38.3105	6.78564	0.939468	0.517208
D7NLB3	Peroxidase	107548102	Peroxidase OS=Zea mays OX=4577 GN=107548102 PE=3 SV=1 - [D7NLB3_MAIZE]	35.0315	6.63916	0.96807	0.364052
B6SHW9	Ubiquitin fusion protein	103647262	Ubiquitin fusion protein OS=Zea mays OX=4577 GN=103647262 PE=2 SV=1 - [B6SHW9_MAIZE]	14.749	9.92041	0.720433	0.0624844
B6SI39	60S ribosomal protein L9-1	ZEAMMB73_Zm00001d035901	60S ribosomal protein L9-1 OS=Zea mays OX=4577 GN=ZEAMMB73_Zm00001d035901 PE=2 SV=1 - [B6SI39_MAIZE]	21.4476	9.70068	0.763237	0.0793271
Q6VWE9	O-methyltransferase (Fragment)	comt	O-methyltransferase (Fragment) OS=Zea mays OX=4577 GN=comt PE=3 SV=1 - [Q6VWE9_MAIZE]	38.8263	5.77002	0.978564	0.533028
A0A1D6PHI2	Peptidase beta subunit	ZEAMMB73_Zm00001d048102	Peptidase beta subunit OS=Zea mays OX=4577 GN=ZEAMMB73_Zm00001d048102 PE=3 SV=1 - [A0A1D6PHI2_MAIZE]	53.3919	5.73193	1.02324	0.332453
A0A1D6JSS7	Putative mitochondrial-processing peptidase subunit beta mitochondrial	100191520	Putative mitochondrial-processing peptidase subunit beta mitochondrial OS=Zea mays OX=4577 GN=100191520 PE=3 SV=1 - [A0A1D6JSS7_MAIZE]	55.3541	6.04932	0.986137	0.695348
A0A1D6Q3U6	Small nuclear ribonucleoprotein family protein	100286216	Small nuclear ribonucleoprotein family protein OS=Zea mays OX=4577 GN=100286216 PE=4 SV=1 - [A0A1D6Q3U6_MAIZE]	8.82198	11.6196	0.983582	0.80597
A0A1D6KUI9	Cell division control protein 48 homolog D	100274218	Cell division control protein 48 homolog D OS=Zea mays OX=4577 GN=100274218 PE=3 SV=1 - [A0A1D6KUI9_MAIZE]	89.9198	5.17334	1.10338	0.120874
B6SZD1	Mitochondrial import receptor subunit TOM20-4	100281827	Mitochondrial import receptor subunit TOM20-4 OS=Zea mays OX=4577 GN=100281827 PE=2 SV=1 - [B6SZD1_MAIZE]	22.4019	4.95752	1.02808	0.371427
B4FSS8	Annexin D4	ZEAMMB73_Zm00001d038065	Annexin D4 OS=Zea mays OX=4577 GN=ZEAMMB73_Zm00001d038065 PE=2 SV=1 - [B4FSS8_MAIZE]	36.2904	7.12256	0.98163	0.441244
A0A1D6PSX8	O-methyltransferase ZRP4	ZEAMMB73_Zm00001d049179	O-methyltransferase ZRP4 OS=Zea mays OX=4577 GN=ZEAMMB73_Zm00001d049179 PE=3 SV=1 - [A0A1D6PSX8_MAIZE]	42.4991	5.73193	1.00899	0.717281
A0A1D6FEA7	Triose phosphate isomerase3	ZEAMMB73_Zm00001d008619	Triose phosphate isomerase3 OS=Zea mays OX=4577 GN=ZEAMMB73_Zm00001d008619 PE=4 SV=1 - [A0A1D6FEA7_MAIZE]	17.7623	4.90674	0.988316	0.718151
B4FUE0	Obg-like ATPase 1	100283841	Obg-like ATPase 1 OS=Zea mays OX=4577 GN=100283841 PE=2 SV=1 - [B4FUE0_MAIZE]	44.2149	6.75635	1.00482	0.902818
B4G1D2	CBS domain protein	CBSX3_0	CBS domain protein OS=Zea mays OX=4577 GN=CBSX3_0 PE=2 SV=1 - [B4G1D2_MAIZE]	22.4837	9.33447	1.21726	0.212719
B4FNK1	Uncharacterized protein		Uncharacterized protein OS=Zea mays OX=4577 PE=2 SV=1 - [B4FNK1_MAIZE]	40.4895	5.70654	1.14259	0.291718
C4JA45	60S ribosomal protein L5-1 homolog b	ZEAMMB73_Zm00001d012161	60S ribosomal protein L5-1 homolog b OS=Zea mays OX=4577 GN=ZEAMMB73_Zm00001d012161 PE=2 SV=1 - [C4JA45_MAIZE]	34.3568	9.33447	1.04183	0.654267
Q71RX2	Isopentenyl pyrophosphate isomerase1	541901	Isopentenyl pyrophosphate isomerase1 OS=Zea mays OX=4577 GN=541901 PE=2 SV=1 - [Q71RX2_MAIZE]	27.2106	4.97021	1.07308	0.184875
B4G0R0	60S ribosomal protein L33-B	ZEAMMB73_Zm00001d052075	60S ribosomal protein L33-B OS=Zea mays OX=4577 GN=ZEAMMB73_Zm00001d052075 PE=2 SV=1 - [B4G0R0_MAIZE]	12.7887	10.521	0.942816	0.24566
B4FTW5	60S ribosomal protein L7-1	100282330	60S ribosomal protein L7-1 OS=Zea mays OX=4577 GN=100282330 PE=2 SV=1 - [B4FTW5_MAIZE]	28.3165	10.1255	1.013	0.897909
B6T7X9	Profilin		Profilin OS=Zea mays OX=4577 PE=2 SV=1 - [B6T7X9_MAIZE]	14.064	4.70361	1.16606	0.298309
A0A1D6FJH2	Double-stranded DNA-binding family protein	ZEAMMB73_Zm00001d009445	Double-stranded DNA-binding family protein OS=Zea mays OX=4577 GN=ZEAMMB73_Zm00001d009445 PE=4 SV=1 - [A0A1D6FJH2_MAIZE]	12.5035	8.79248	1.38281	0.235154
B4G087	Adenine nucleotide alpha hydrolase-like superfamily protein	100274324	Adenine nucleotide alpha hydrolase-like superfamily protein OS=Zea mays OX=4577 GN=100274324 PE=2 SV=1 - [B4G087_MAIZE]	17.8674	6.80029	0.994252	0.933169
B4FKH7	Cytochrome B5 isoform D	100216924	Cytochrome B5 isoform D OS=Zea mays OX=4577 GN=100216924 PE=2 SV=1 - [B4FKH7_MAIZE]	14.8516	5.30029	1.12581	0.173132
B4FSE9	Histone H2B	ZEAMMB73_Zm00001d020580	Histone H2B OS=Zea mays OX=4577 GN=ZEAMMB73_Zm00001d020580 PE=2 SV=1 - [B4FSE9_MAIZE]	16.4101	9.99365	1.94875	0.0923106
B4F9G8	Pyruvate kinase	100191614	Pyruvate kinase OS=Zea mays OX=4577 GN=100191614 PE=2 SV=1 - [B4F9G8_MAIZE]	57.3069	6.90283	1.07061	0.0792072
B6SNM4	Protein transport protein Sec61 subunit beta	100280873	Protein transport protein Sec61 subunit beta OS=Zea mays OX=4577 GN=100280873 PE=2 SV=1 - [B6SNM4_MAIZE]	10.6074	11.9272	1.12005	0.160773
B4F9G0	60S ribosomal protein L4-1	ZEAMMB73_Zm00001d013076	60S ribosomal protein L4-1 OS=Zea mays OX=4577 GN=ZEAMMB73_Zm00001d013076 PE=2 SV=1 - [B4F9G0_MAIZE]	44.3119	10.5942	1.04424	0.580868
B6T8U6	Cytochrome c oxidase polypeptide Vc		Cytochrome c oxidase polypeptide Vc OS=Zea mays OX=4577 PE=2 SV=1 - [B6T8U6_MAIZE]	6.93462	9.31982	0.980591	0.860525
B4FPL1	Bowman-Birk type wound-induced proteinase inhibitor WIP1	100281945	Bowman-Birk type wound-induced proteinase inhibitor WIP1 OS=Zea mays OX=4577 GN=100281945 PE=2 SV=1 - [B4FPL1_MAIZE]	9.50369	8.33838	1.99436	0.247998
A3KLI1	Dehydrin DHN1	rab17	Dehydrin DHN1 OS=Zea mays OX=4577 GN=rab17 PE=2 SV=1 - [A3KLI1_MAIZE]	17.0651	8.85107	1.05569	0.874034
B6U0S1	Elongation factor 2	LOS1_1	Elongation factor 2 OS=Zea mays OX=4577 GN=LOS1_1 PE=2 SV=1 - [B6U0S1_MAIZE]	93.8616	6.354	0.876405	0.150818
K7VQ65	Putative translation elongation factor family protein	100272648	Putative translation elongation factor family protein OS=Zea mays OX=4577 GN=100272648 PE=4 SV=1 - [K7VQ65_MAIZE]	93.8456	6.354	0.876823	0.158228
B6SYB8	Pi starvation-induced protein		Pi starvation-induced protein OS=Zea mays OX=4577 PE=2 SV=1 - [B6SYB8_MAIZE]	11.538	6.29053	1.51827	0.228176
B4FWR7	60S ribosomal protein L13	100273645	60S ribosomal protein L13 OS=Zea mays OX=4577 GN=100273645 PE=2 SV=2 - [B4FWR7_MAIZE]	23.9222	10.8433	0.923428	0.293291
A0A3B6U5S8	Uncharacterized protein		Uncharacterized protein OS=Zea mays OX=4577 PE=4 SV=1 - [A0A3B6U5S8_MAIZE]	24.2959	8.74854	0.931918	0.157674
Q41784	Tubulin beta-7 chain	TUBB7	Tubulin beta-7 chain OS=Zea mays OX=4577 GN=TUBB7 PE=2 SV=1 - [TBB7_MAIZE]	50.0618	4.81787	1.06204	0.309587
C0PD27	Isocitrate dehydrogenase [NADP]	100272371	Isocitrate dehydrogenase [NADP] OS=Zea mays OX=4577 GN=100272371 PE=2 SV=1 - [C0PD27_MAIZE]	46.1944	6.69775	1.01247	0.725044
B4FSV6	6-phosphogluconate dehydrogenase, decarboxylating	541700	6-phosphogluconate dehydrogenase, decarboxylating OS=Zea mays OX=4577 GN=541700 PE=2 SV=1 - [B4FSV6_MAIZE]	52.8178	6.29053	1.09508	0.0884093
B4FB55	Ras-related protein ARA-3	103635765	Ras-related protein ARA-3 OS=Zea mays OX=4577 GN=103635765 PE=2 SV=1 - [B4FB55_MAIZE]	23.8673	8.22119	1.15686	0.0521049
A0A1D6P848	Sucrose synthase	542247	Sucrose synthase OS=Zea mays OX=4577 GN=542247 PE=3 SV=1 - [A0A1D6P848_MAIZE]	90.481	6.50732	1.02869	0.683122
B8A1C0	Proliferating cell nuclear antigen	ZEAMMB73_Zm00001d018415	Proliferating cell nuclear antigen OS=Zea mays OX=4577 GN=ZEAMMB73_Zm00001d018415 PE=2 SV=1 - [B8A1C0_MAIZE]	29.3235	4.75439	1.00621	0.93358
B4FT23	14-3-3-like protein GF14 nu	100283140	14-3-3-like protein GF14 nu OS=Zea mays OX=4577 GN=100283140 PE=2 SV=1 - [B4FT23_MAIZE]	28.5733	4.81787	1.24341	0.443776
A0A1D6IN01	Peroxidase	ZEAMMB73_Zm00001d022458	Peroxidase OS=Zea mays OX=4577 GN=ZEAMMB73_Zm00001d022458 PE=3 SV=1 - [A0A1D6IN01_MAIZE]	28.4025	9.0415	0.858384	0.17993
B4FHM5	60S ribosomal protein L37a	100280393	60S ribosomal protein L37a OS=Zea mays OX=4577 GN=100280393 PE=2 SV=1 - [B4FHM5_MAIZE]	10.2364	10.2866	1.10327	0.176435
C4IYY6	60S acidic ribosomal protein P2A	542323	60S acidic ribosomal protein P2A OS=Zea mays OX=4577 GN=542323 PE=2 SV=1 - [C4IYY6_MAIZE]	11.3456	4.28467	0.938361	0.268807
B6TFB6	Stress responsive protein		Stress responsive protein OS=Zea mays OX=4577 PE=2 SV=1 - [B6TFB6_MAIZE]	22.1377	7.41553	1.17197	0.276835
A0A1D6K8Y4	Tobamovirus multiplication protein 2A	100284460	Tobamovirus multiplication protein 2A OS=Zea mays OX=4577 GN=100284460 PE=4 SV=1 - [A0A1D6K8Y4_MAIZE]	14.6664	8.14795	0.961736	0.889753
A0A1D6N1Z8	6-phosphogluconate dehydrogenase, decarboxylating	541699	6-phosphogluconate dehydrogenase, decarboxylating OS=Zea mays OX=4577 GN=541699 PE=3 SV=1 - [A0A1D6N1Z8_MAIZE]	52.6229	6.3667	1.00592	0.9034
A0A1D6NVW3	Enolase 1	ZEAMMB73_Zm00001d045431	Enolase 1 OS=Zea mays OX=4577 GN=ZEAMMB73_Zm00001d045431 PE=3 SV=1 - [A0A1D6NVW3_MAIZE]	47.0779	5.24951	0.961218	0.255103
B4G1R3	Ras-related protein RABH1b	100274535	Ras-related protein RABH1b OS=Zea mays OX=4577 GN=100274535 PE=2 SV=1 - [B4G1R3_MAIZE]	22.9147	7.91357	1.04605	0.182126
C4JBJ2	Tubulin alpha chain	ZEAMMB73_Zm00001d013159	Tubulin alpha chain OS=Zea mays OX=4577 GN=ZEAMMB73_Zm00001d013159 PE=2 SV=1 - [C4JBJ2_MAIZE]	49.5294	5.23682	1.30062	0.0799071
B4FIB2	Ras-related protein RABA1d	100194331	Ras-related protein RABA1d OS=Zea mays OX=4577 GN=100194331 PE=2 SV=1 - [B4FIB2_MAIZE]	23.9501	5.73193	0.940288	0.461777
C0PJQ8	Uncharacterized protein		Uncharacterized protein OS=Zea mays OX=4577 PE=2 SV=1 - [C0PJQ8_MAIZE]	37.8912	5.97314	1.07018	0.33256
B6T7A1	Voltage-gated potassium channel beta subunit		Voltage-gated potassium channel beta subunit OS=Zea mays OX=4577 PE=2 SV=1 - [B6T7A1_MAIZE]	36.4892	7.32764	1.00606	0.636952
B4FU37	Proteasome subunit alpha type		Proteasome subunit alpha type OS=Zea mays OX=4577 PE=2 SV=1 - [B4FU37_MAIZE]	27.2639	6.31592	1.22572	0.182748
A0A1D6MMY9	ATP/GTP binding protein-like	ZEAMMB73_Zm00001d040079	ATP/GTP binding protein-like OS=Zea mays OX=4577 GN=ZEAMMB73_Zm00001d040079 PE=4 SV=1 - [A0A1D6MMY9_MAIZE]	3.93709	9.46631	1.02931	0.86328
C0P664	Tubulin beta chain	100382290	Tubulin beta chain OS=Zea mays OX=4577 GN=100382290 PE=2 SV=1 - [C0P664_MAIZE]	50.2608	4.83057	0.948705	0.74896
B4FPR8	Uncharacterized protein		Uncharacterized protein OS=Zea mays OX=4577 PE=2 SV=1 - [B4FPR8_MAIZE]	32.6035	5.93506	0.926892	0.330576
A0A1D6L8E2	Cytochrome b-c1 complex subunit 7	100384355	Cytochrome b-c1 complex subunit 7 OS=Zea mays OX=4577 GN=100384355 PE=3 SV=1 - [A0A1D6L8E2_MAIZE]	14.3204	9.56885	0.861789	0.063168
A0A1D6KTZ2	Chaperonin2	542707	Chaperonin2 OS=Zea mays OX=4577 GN=542707 PE=3 SV=1 - [A0A1D6KTZ2_MAIZE]	60.6978	5.84619	1.39439	0.0561109
A0A1D6K5Y8	Pathogenesis-related protein 1	103636577	Pathogenesis-related protein 1 OS=Zea mays OX=4577 GN=103636577 PE=3 SV=1 - [A0A1D6K5Y8_MAIZE]	19.1444	9.33447	0.958081	0.590003
C4J4W3	Hsp70-Hsp90 organizing protein 3	100501647	Hsp70-Hsp90 organizing protein 3 OS=Zea mays OX=4577 GN=100501647 PE=2 SV=1 - [C4J4W3_MAIZE]	65.2778	6.32861	1.18455	0.168215
B6T5B9	60S ribosomal protein L10	RPL10_0	60S ribosomal protein L10 OS=Zea mays OX=4577 GN=RPL10_0 PE=2 SV=1 - [B6T5B9_MAIZE]	24.8931	10.2427	1.07932	0.190697
B4FQC6	Glucose-6-phosphate isomerase	100281592	Glucose-6-phosphate isomerase OS=Zea mays OX=4577 GN=100281592 PE=2 SV=1 - [B4FQC6_MAIZE]	67.4965	5.98584	0.961305	0.136912
B8A377	Cysteine synthase	542438	Cysteine synthase OS=Zea mays OX=4577 GN=542438 PE=2 SV=1 - [B8A377_MAIZE]	34.1119	5.80811	1.28913	0.0507233
K7UZY7	60S ribosomal protein L23	100193874	60S ribosomal protein L23 OS=Zea mays OX=4577 GN=100193874 PE=3 SV=1 - [K7UZY7_MAIZE]	13.117	10.6968	1.00967	0.914002
B4FV03	Glutathione transferase11	541829	Glutathione transferase11 OS=Zea mays OX=4577 GN=541829 PE=2 SV=1 - [B4FV03_MAIZE]	34.0962	8.104	1.01551	0.771343
B6SXB4	Uncharacterized protein		Uncharacterized protein OS=Zea mays OX=4577 PE=2 SV=1 - [B6SXB4_MAIZE]	6.85111	7.29834	1.07933	0.280036
C0PAU7	Glucose-6-phosphate isomerase	100382805	Glucose-6-phosphate isomerase OS=Zea mays OX=4577 GN=100382805 PE=2 SV=1 - [C0PAU7_MAIZE]	67.3886	5.80811	0.894014	0.198381
B4FAQ9	DREPP4 protein	100191938	DREPP4 protein OS=Zea mays OX=4577 GN=100191938 PE=2 SV=1 - [B4FAQ9_MAIZE]	22.6299	4.90674	1.54911	0.0809018
Q4A1J4	Cysteine proteinase inhibitor (Fragment)	cc7	Cysteine proteinase inhibitor (Fragment) OS=Zea mays OX=4577 GN=cc7 PE=2 SV=1 - [Q4A1J4_MAIZE]	10.7606	9.68604	0.850453	0.0838086
B4F946	Tubulin beta chain	100381283	Tubulin beta chain OS=Zea mays OX=4577 GN=100381283 PE=2 SV=1 - [B4F946_MAIZE]	50.0838	4.94482	1.02132	0.659017
A0A1R3M158	Benzoxazinone synthesis9	ZEAMMB73_Zm00001d031209	Benzoxazinone synthesis9 OS=Zea mays OX=4577 GN=ZEAMMB73_Zm00001d031209 PE=4 SV=1 - [A0A1R3M158_MAIZE]	49.9856	5.31299	0.989683	0.567951
B4FDT0	40S ribosomal protein S20-1	100194044	40S ribosomal protein S20-1 OS=Zea mays OX=4577 GN=100194044 PE=2 SV=1 - [B4FDT0_MAIZE]	13.9934	9.43701	1.1818	0.0639386
Q9XGC6	Adenosine kinase (Fragment)		Adenosine kinase (Fragment) OS=Zea mays OX=4577 PE=2 SV=1 - [Q9XGC6_MAIZE]	36.0093	5.33838	0.984759	0.797191
K7V067	Isocitrate dehydrogenase [NADP]	ZEAMMB73_Zm00001d011487	Isocitrate dehydrogenase [NADP] OS=Zea mays OX=4577 GN=ZEAMMB73_Zm00001d011487 PE=3 SV=1 - [K7V067_MAIZE]	46.1675	6.55127	0.972183	0.495856
B4F9H6	Superoxide dismutase	100193398	Superoxide dismutase OS=Zea mays OX=4577 GN=100193398 PE=2 SV=1 - [B4F9H6_MAIZE]	25.211	7.26904	1.9267	0.199416
B4G194	40S ribosomal protein SA	100282918	40S ribosomal protein SA OS=Zea mays OX=4577 GN=100282918 PE=2 SV=1 - [B4G194_MAIZE]	33.4687	5.08447	1.10365	0.162974
B4FTD2	40S ribosomal protein SA		40S ribosomal protein SA OS=Zea mays OX=4577 PE=2 SV=1 - [B4FTD2_MAIZE]	33.4007	5.08447	0.942114	0.13707
B6TLX0	NADH-ubiquinone oxidoreductase 10.5 kDa subunit	100283792	NADH-ubiquinone oxidoreductase 10.5 kDa subunit OS=Zea mays OX=4577 GN=100283792 PE=2 SV=1 - [B6TLX0_MAIZE]	11.0948	9.20264	1.05662	0.249009
A0A1D6GCZ1	Outer envelope pore protein 24A chloroplastic	ZEAMMB73_Zm00001d012820	Outer envelope pore protein 24A chloroplastic OS=Zea mays OX=4577 GN=ZEAMMB73_Zm00001d012820 PE=4 SV=1 - [A0A1D6GCZ1_MAIZE]	23.7363	9.24658	1.07725	0.423306
B6T033	Glutathione S-transferase GSTU6	541850	Glutathione S-transferase GSTU6 OS=Zea mays OX=4577 GN=541850 PE=2 SV=1 - [B6T033_MAIZE]	25.6633	5.22412	1.06257	0.658725
C0P5U8	Glutathione S-transferase2	ZEAMMB73_Zm00001d024839	Glutathione S-transferase2 OS=Zea mays OX=4577 GN=ZEAMMB73_Zm00001d024839 PE=2 SV=1 - [C0P5U8_MAIZE]	24.5547	6.15088	1.06257	0.288233
C4J988	Uncharacterized protein		Uncharacterized protein OS=Zea mays OX=4577 PE=2 SV=1 - [C4J988_MAIZE]	20.2497	10.2866	1.19801	0.11912
B4FQQ1	Reactive Intermediate Deaminase A chloroplastic	100273379	Reactive Intermediate Deaminase A chloroplastic OS=Zea mays OX=4577 GN=100273379 PE=2 SV=1 - [B4FQQ1_MAIZE]	18.8769	9.45166	1.03905	0.572078
B4FSW5	Peroxidase	100273104	Peroxidase OS=Zea mays OX=4577 GN=100273104 PE=2 SV=1 - [B4FSW5_MAIZE]	36.9772	6.06201	0.953258	0.373268
C3UZ63	HSP protein	HSP90-2	HSP protein OS=Zea mays OX=4577 GN=HSP90-2 PE=2 SV=1 - [C3UZ63_MAIZE]	80.3118	5.05908	1.02564	0.166192
B6T6B8	60 ribosomal protein L14		60 ribosomal protein L14 OS=Zea mays OX=4577 PE=2 SV=1 - [B6T6B8_MAIZE]	16.2051	10.4917	0.993265	0.942503
A0A1D6F4C8	Peroxidase	541674	Peroxidase OS=Zea mays OX=4577 GN=541674 PE=3 SV=1 - [A0A1D6F4C8_MAIZE]	33.4536	8.07471	1.03827	0.514892
B6TXT3	Uncharacterized protein		Uncharacterized protein OS=Zea mays OX=4577 PE=2 SV=1 - [B6TXT3_MAIZE]	6.7705	10.8286	0.875895	0.0659918
B6TP36	Prohibitin		Prohibitin OS=Zea mays OX=4577 PE=2 SV=1 - [B6TP36_MAIZE]	30.7444	7.07861	0.909547	0.0827797
B4FPD1	Membrane steroid-binding protein 1	100280580	Membrane steroid-binding protein 1 OS=Zea mays OX=4577 GN=100280580 PE=2 SV=1 - [B4FPD1_MAIZE]	11.0016	5.51611	1.0792	0.738308
A0A1D6NY66	Ubiquitin receptor RAD23c	100274222	Ubiquitin receptor RAD23c OS=Zea mays OX=4577 GN=100274222 PE=4 SV=1 - [A0A1D6NY66_MAIZE]	43.079	4.729	1.01646	0.613125
B6U772	LSM7-like	100285982	LSM7-like OS=Zea mays OX=4577 GN=100285982 PE=2 SV=1 - [B6U772_MAIZE]	10.5425	5.0083	1.2339	0.186021
B6T2Z0	B12D protein	100285481	B12D protein OS=Zea mays OX=4577 GN=100285481 PE=2 SV=1 - [B6T2Z0_MAIZE]	11.0777	9.37842	0.958033	0.438129
B6SJ08	60S ribosomal protein L18-3	100192878	60S ribosomal protein L18-3 OS=Zea mays OX=4577 GN=100192878 PE=2 SV=1 - [B6SJ08_MAIZE]	21.0296	11.4878	1.1614	0.373934
Q9SBJ3	6-phosphogluconate dehydrogenase isoenzyme A (Fragment)		6-phosphogluconate dehydrogenase isoenzyme A (Fragment) OS=Zea mays OX=4577 PE=2 SV=1 - [Q9SBJ3_MAIZE]	19.0347	5.07178	0.812554	0.09297
B4FGL3	Putative ATP synthase 24 kDa subunit mitochondrial	ZEAMMB73_Zm00001d015134	Putative ATP synthase 24 kDa subunit mitochondrial OS=Zea mays OX=4577 GN=ZEAMMB73_Zm00001d015134 PE=2 SV=1 - [B4FGL3_MAIZE]	27.6358	7.98682	2.00519	0.129076
A0A1D6KCW2	Glyoxylate reductase	ZEAMMB73_Zm00001d030544	Glyoxylate reductase OS=Zea mays OX=4577 GN=ZEAMMB73_Zm00001d030544 PE=3 SV=1 - [A0A1D6KCW2_MAIZE]	34.476	6.29053	0.960426	0.280442
B6T7Z2	Cytochrome B5 isoform D	ZEAMMB73_Zm00001d011081	Cytochrome B5 isoform D OS=Zea mays OX=4577 GN=ZEAMMB73_Zm00001d011081 PE=2 SV=1 - [B6T7Z2_MAIZE]	14.6654	5.51611	1.07075	0.212823
A0A1D6LIK1	Peptidyl-prolyl cis-trans isomerase	ZEAMMB73_Zm00001d035761	Peptidyl-prolyl cis-trans isomerase OS=Zea mays OX=4577 GN=ZEAMMB73_Zm00001d035761 PE=3 SV=1 - [A0A1D6LIK1_MAIZE]	26.4275	9.33447	0.895463	0.211993
B4FAF8	Alba DNA/RNA-binding protein	103649688	Alba DNA/RNA-binding protein OS=Zea mays OX=4577 GN=103649688 PE=2 SV=1 - [B4FAF8_MAIZE]	15.706	5.22412	0.960235	0.555581
C0PAS9	Alba DNA/RNA-binding protein	100275297	Alba DNA/RNA-binding protein OS=Zea mays OX=4577 GN=100275297 PE=2 SV=1 - [C0PAS9_MAIZE]	15.8631	5.22412	1.12645	0.354239
B6TCP3	Uncharacterized protein		Uncharacterized protein OS=Zea mays OX=4577 PE=2 SV=1 - [B6TCP3_MAIZE]	6.5082	4.65283	0.932565	0.0887756
A0A1D6E7M4	Protoporphyrinogen IX oxidase2	541866	Protoporphyrinogen IX oxidase2 OS=Zea mays OX=4577 GN=541866 PE=4 SV=1 - [A0A1D6E7M4_MAIZE]	6.16517	7.23975	0.879033	0.394197
C0HGT5	T-complex protein 1 subunit delta	100381530	T-complex protein 1 subunit delta OS=Zea mays OX=4577 GN=100381530 PE=2 SV=1 - [C0HGT5_MAIZE]	57.6967	7.21045	1.11821	0.253279
A0A1D6F1Q4	40S ribosomal protein SA	100283431	40S ribosomal protein SA OS=Zea mays OX=4577 GN=100283431 PE=3 SV=1 - [A0A1D6F1Q4_MAIZE]	31.6869	5.24951	1.09914	0.171656
Q43697	Tubulin beta-5 chain	TUBB5	Tubulin beta-5 chain OS=Zea mays OX=4577 GN=TUBB5 PE=2 SV=1 - [TBB5_MAIZE]	50.0108	4.88135	0.943068	0.576004
B4FK84	Glutathione S-transferase 3	541990	Glutathione S-transferase 3 OS=Zea mays OX=4577 GN=541990 PE=2 SV=1 - [B4FK84_MAIZE]	23.8797	6.41748	1.07828	0.16982
B6SNE5	Alfin-like transcription factor	ALF5	Alfin-like transcription factor OS=Zea mays OX=4577 GN=ALF5 PE=2 SV=1 - [B6SNE5_MAIZE]	6.7393	9.11475	1.01387	0.777353
A0A1D6HYR6	Aquaporin PIP2-1	541888	Aquaporin PIP2-1 OS=Zea mays OX=4577 GN=541888 PE=3 SV=1 - [A0A1D6HYR6_MAIZE]	24.3385	7.81104	0.913359	0.286566
B8A0J4	Phospholipase D		Phospholipase D OS=Zea mays OX=4577 PE=2 SV=1 - [B8A0J4_MAIZE]	92.2141	5.60498	1.01595	0.564965
A0A1D6E5Z0	Phenylalanine ammonia-lyase	100384215	Phenylalanine ammonia-lyase OS=Zea mays OX=4577 GN=100384215 PE=3 SV=1 - [A0A1D6E5Z0_MAIZE]	75.6078	6.53662	1.02388	0.774722
B6T7G7	Elongation factor 1-gamma 3	100282446	Elongation factor 1-gamma 3 OS=Zea mays OX=4577 GN=100282446 PE=2 SV=1 - [B6T7G7_MAIZE]	47.2372	6.48096	0.98448	0.711926
A0A1D6LSP2	Elongation factor gamma1	100192872	Elongation factor gamma1 OS=Zea mays OX=4577 GN=100192872 PE=4 SV=1 - [A0A1D6LSP2_MAIZE]	47.147	6.3667	0.946336	0.299317
B4F7V3	Protein phosphatase 2C isoform epsilon	100191167	Protein phosphatase 2C isoform epsilon OS=Zea mays OX=4577 GN=100191167 PE=2 SV=1 - [B4F7V3_MAIZE]	31.7153	6.75635	0.935406	0.162929
B6TUC4	Glycine-rich RNA-binding protein 2		Glycine-rich RNA-binding protein 2 OS=Zea mays OX=4577 PE=2 SV=1 - [B6TUC4_MAIZE]	15.6457	9.0415	1.07829	0.089956
A0A1D6J0S0	Monodehydroascorbate reductase 5 mitochondrial	100272772	Monodehydroascorbate reductase 5 mitochondrial OS=Zea mays OX=4577 GN=100272772 PE=4 SV=1 - [A0A1D6J0S0_MAIZE]	52.518	7.95752	1.00378	0.967109
A0A1D6N511	Fructokinase1	ZEAMMB73_Zm00001d042536	Fructokinase1 OS=Zea mays OX=4577 GN=ZEAMMB73_Zm00001d042536 PE=3 SV=1 - [A0A1D6N511_MAIZE]	30.4617	4.91943	0.949849	0.465279
A0A1D6G9Q0	Proteasome subunit alpha type	ZEAMMB73_Zm00001d012546	Proteasome subunit alpha type OS=Zea mays OX=4577 GN=ZEAMMB73_Zm00001d012546 PE=3 SV=1 - [A0A1D6G9Q0_MAIZE]	27.2599	6.31592	1.19944	0.0677553
B4G1M9	Serine/threonine-protein phosphatase	100381284	Serine/threonine-protein phosphatase OS=Zea mays OX=4577 GN=100381284 PE=2 SV=1 - [B4G1M9_MAIZE]	35.1831	5.32568	0.970633	0.69044
B6T9P0	UDP-glucose 6-dehydrogenase	100279549	UDP-glucose 6-dehydrogenase OS=Zea mays OX=4577 GN=100279549 PE=2 SV=1 - [B6T9P0_MAIZE]	52.8681	5.99854	1.05988	0.399798
C0PHG0	Uncharacterized protein		Uncharacterized protein OS=Zea mays OX=4577 PE=2 SV=1 - [C0PHG0_MAIZE]	10.5658	8.19189	1.09235	0.362616
A0A1D6NR73	B12D protein	ZEAMMB73_Zm00001d044747	B12D protein OS=Zea mays OX=4577 GN=ZEAMMB73_Zm00001d044747 PE=4 SV=1 - [A0A1D6NR73_MAIZE]	7.89303	9.46631	0.789757	0.053572
A0A1D6N9Q8	Uncharacterized protein	ZEAMMB73_Zm00001d043251	Uncharacterized protein OS=Zea mays OX=4577 GN=ZEAMMB73_Zm00001d043251 PE=4 SV=1 - [A0A1D6N9Q8_MAIZE]	7.91375	4.65283	0.871987	0.0529963
Q4A1J7	Cysteine proteinase inhibitor (Fragment)	cc4	Cysteine proteinase inhibitor (Fragment) OS=Zea mays OX=4577 GN=cc4 PE=2 SV=1 - [Q4A1J7_MAIZE]	24.5479	6.59521	0.913244	0.174694
B6TR92	Glutathione peroxidase		Glutathione peroxidase OS=Zea mays OX=4577 PE=2 SV=1 - [B6TR92_MAIZE]	18.4474	8.20654	1.13108	0.11004
B4FUW2	Ribosomal protein L15	100284349	Ribosomal protein L15 OS=Zea mays OX=4577 GN=100284349 PE=2 SV=1 - [B4FUW2_MAIZE]	24.3433	11.6343	1.01685	0.861503
B4FNW1	Triose phosphate isomerase4	ZEAMMB73_Zm00001d039865	Triose phosphate isomerase4 OS=Zea mays OX=4577 GN=ZEAMMB73_Zm00001d039865 PE=2 SV=1 - [B4FNW1_MAIZE]	27.008	5.68115	0.989938	0.754893
B6THM9	60S ribosomal protein L22-2	100283364	60S ribosomal protein L22-2 OS=Zea mays OX=4577 GN=100283364 PE=2 SV=1 - [B6THM9_MAIZE]	14.5177	9.43701	1.20653	0.133133
K7UY19	Fructose-bisphosphate aldolase	100502020	Fructose-bisphosphate aldolase OS=Zea mays OX=4577 GN=100502020 PE=3 SV=1 - [K7UY19_MAIZE]	41.7054	8.77783	1.06039	0.328463
A0A1D6J1P7	PTI1-like tyrosine-protein kinase 3	100037783	PTI1-like tyrosine-protein kinase 3 OS=Zea mays OX=4577 GN=100037783 PE=3 SV=1 - [A0A1D6J1P7_MAIZE]	36.997	8.29443	0.780005	0.107214
A1YLY2	Cytidine/deoxycytidylate deaminase family protein	CDA1-En	Cytidine/deoxycytidylate deaminase family protein OS=Zea mays OX=4577 GN=CDA1-En PE=2 SV=1 - [A1YLY2_MAIZE]	20.252	5.60498	0.950968	0.539455
B4FW90	ER luminal binding protein	BIP1	ER luminal binding protein OS=Zea mays OX=4577 GN=BIP1 PE=2 SV=1 - [B4FW90_MAIZE]	73.0397	5.21143	1.00716	0.775496
B4F7V1	2-dehydro-3-deoxyphosphooctonate aldolase 2	100191165	2-dehydro-3-deoxyphosphooctonate aldolase 2 OS=Zea mays OX=4577 GN=100191165 PE=2 SV=1 - [B4F7V1_MAIZE]	31.7267	7.69385	1.16084	0.185237
Q5K097	NADH dehydrogenase, subunit 9	nad9	NADH dehydrogenase, subunit 9 OS=Zea mays OX=4577 GN=nad9 PE=2 SV=1 - [Q5K097_MAIZE]	22.9165	7.98682	0.998738	0.979846
A3FMB9	Proteasome subunit alpha type	PAD1	Proteasome subunit alpha type OS=Zea mays OX=4577 GN=PAD1 PE=2 SV=1 - [A3FMB9_MAIZE]	27.2112	8.19189	1.32334	0.102361
B4FVD5	V-type proton ATPase subunit E3	100273417	V-type proton ATPase subunit E3 OS=Zea mays OX=4577 GN=100273417 PE=2 SV=1 - [B4FVD5_MAIZE]	26.6129	7.00537	1.06421	0.260078
B4FSJ1	V-type proton ATPase subunit C		V-type proton ATPase subunit C OS=Zea mays OX=4577 PE=2 SV=1 - [B4FSJ1_MAIZE]	42.6368	5.96045	0.952494	0.098617
B4G0U0	V-type proton ATPase subunit C	100274416	V-type proton ATPase subunit C OS=Zea mays OX=4577 GN=100274416 PE=2 SV=1 - [B4G0U0_MAIZE]	42.5937	5.64307	0.911496	0.321443
B6SXC2	Uncharacterized protein		Uncharacterized protein OS=Zea mays OX=4577 PE=2 SV=1 - [B6SXC2_MAIZE]	9.76625	8.44092	0.981447	0.689733
A5H452	Peroxidase 70	PER70	Peroxidase 70 OS=Zea mays OX=4577 GN=PER70 PE=1 SV=1 - [PER70_MAIZE]	33.46	8.89502	1.08121	0.23622
A0A1D6FSS5	NAD(P)H dehydrogenase (Quinone) FQR1	ZEAMMB73_Zm00001d010698	NAD(P)H dehydrogenase (Quinone) FQR1 OS=Zea mays OX=4577 GN=ZEAMMB73_Zm00001d010698 PE=4 SV=1 - [A0A1D6FSS5_MAIZE]	19.1696	6.37939	1.53982	0.18338
A0A1D6FKW0	Malate dehydrogenase	ZEAMMB73_Zm00001d009640	Malate dehydrogenase OS=Zea mays OX=4577 GN=ZEAMMB73_Zm00001d009640 PE=3 SV=1 - [A0A1D6FKW0_MAIZE]	26.3299	8.70459	1.79926	0.309315
B6SPH3	Mitochondrial import receptor subunit TOM5-like protein	ZEAMMB73_Zm00001d033186	Mitochondrial import receptor subunit TOM5-like protein OS=Zea mays OX=4577 GN=ZEAMMB73_Zm00001d033186 PE=2 SV=1 - [B6SPH3_MAIZE]	5.90203	5.10986	1.22645	0.235435
A0A1D6N4X3	60S ribosomal protein L5-1 homolog a	103650892	60S ribosomal protein L5-1 homolog a OS=Zea mays OX=4577 GN=103650892 PE=3 SV=1 - [A0A1D6N4X3_MAIZE]	34.4188	9.31982	0.914385	0.0910887
A0A1D6HW85	Nitrile-specifier protein 1	103632137	Nitrile-specifier protein 1 OS=Zea mays OX=4577 GN=103632137 PE=4 SV=2 - [A0A1D6HW85_MAIZE]	40.1793	5.18604	0.863937	0.055608
A0A1D6E6A8	Glutaredoxin homolog1	100283339	Glutaredoxin homolog1 OS=Zea mays OX=4577 GN=100283339 PE=4 SV=1 - [A0A1D6E6A8_MAIZE]	7.43978	8.30908	1.40796	0.239775
B4G019	Hydroxyproline-rich glycoprotein family protein	100274292	Hydroxyproline-rich glycoprotein family protein OS=Zea mays OX=4577 GN=100274292 PE=2 SV=1 - [B4G019_MAIZE]	33.3377	6.44287	1.04029	0.623793
K7UCH1	Putative TCP-1/cpn60 chaperonin family protein	103654524	Putative TCP-1/cpn60 chaperonin family protein OS=Zea mays OX=4577 GN=103654524 PE=3 SV=1 - [K7UCH1_MAIZE]	58.8693	5.42725	1.04741	0.351112
A0A1D6ETY2	Triose phosphate isomerase2	100193000	Triose phosphate isomerase2 OS=Zea mays OX=4577 GN=100193000 PE=3 SV=1 - [A0A1D6ETY2_MAIZE]	31.5803	7.35693	1.01044	0.886301
A0A1D6PSC4	Protein disulfide-isomerase	606409	Protein disulfide-isomerase OS=Zea mays OX=4577 GN=606409 PE=3 SV=1 - [A0A1D6PSC4_MAIZE]	51.132	5.46533	1.03336	0.343085
A0A1D6FQ36	Guanosine nucleotide diphosphate dissociation inhibitor	100501867	Guanosine nucleotide diphosphate dissociation inhibitor OS=Zea mays OX=4577 GN=100501867 PE=3 SV=1 - [A0A1D6FQ36_MAIZE]	48.3682	6.26514	0.950413	0.291095
Q8LK64	Glutathione peroxidase	GP	Glutathione peroxidase OS=Zea mays OX=4577 GN=GP PE=2 SV=1 - [Q8LK64_MAIZE]	18.6083	6.01123	0.962124	0.866388
B6TJ78	3-N-debenzoyl-2-deoxytaxol N-benzoyltransferase		3-N-debenzoyl-2-deoxytaxol N-benzoyltransferase OS=Zea mays OX=4577 PE=2 SV=1 - [B6TJ78_MAIZE]	46.1263	5.64307	0.993929	0.81068
B6SGX0	60S ribosomal protein L36	100283331	60S ribosomal protein L36 OS=Zea mays OX=4577 GN=100283331 PE=2 SV=1 - [B6SGX0_MAIZE]	12.5823	11.5757	1.19735	0.14451
Q6RFK3	Peroxidase (Fragment)	pox3	Peroxidase (Fragment) OS=Zea mays OX=4577 GN=pox3 PE=3 SV=1 - [Q6RFK3_MAIZE]	38.3144	6.96143	0.946739	0.367263
C4IZS5	Uncharacterized protein		Uncharacterized protein OS=Zea mays OX=4577 PE=2 SV=1 - [C4IZS5_MAIZE]	10.0767	8.45557	1.01369	0.935935
A0A317YJF2	Uncharacterized protein YsfE	Zm00014a_034839	Uncharacterized protein YsfE OS=Zea mays OX=4577 GN=Zm00014a_034839 PE=4 SV=1 - [A0A317YJF2_MAIZE]	15.0156	6.13818	0.910884	0.437618
B4G029	HXXXD-type acyl-transferase family protein	100283365	HXXXD-type acyl-transferase family protein OS=Zea mays OX=4577 GN=100283365 PE=2 SV=1 - [B4G029_MAIZE]	47.118	7.50342	0.962853	0.122719
B6TRR5	Formate dehydrogenase, mitochondrial		Formate dehydrogenase, mitochondrial OS=Zea mays OX=4577 PE=2 SV=1 - [B6TRR5_MAIZE]	41.3931	6.80029	1.12369	0.282727
A0A1D6MC13	Dynamin-related protein 1A	ZEAMMB73_Zm00001d038955	Dynamin-related protein 1A OS=Zea mays OX=4577 GN=ZEAMMB73_Zm00001d038955 PE=3 SV=1 - [A0A1D6MC13_MAIZE]	69.102	8.11865	1.03632	0.521958
K7TH00	Polyamine oxidase1	ZEAMMB73_Zm00001d024281	Polyamine oxidase1 OS=Zea mays OX=4577 GN=ZEAMMB73_Zm00001d024281 PE=4 SV=1 - [K7TH00_MAIZE]	56.3354	6.04932	1.02961	0.32026
A0A096QRL3	Nana plant2	ZEAMMB73_Zm00001d014887	Nana plant2 OS=Zea mays OX=4577 GN=ZEAMMB73_Zm00001d014887 PE=4 SV=1 - [A0A096QRL3_MAIZE]	65.0692	8.26514	0.95978	0.345741
B4FRJ3	Proteasome subunit beta	100191806	Proteasome subunit beta OS=Zea mays OX=4577 GN=100191806 PE=2 SV=1 - [B4FRJ3_MAIZE]	26.1081	5.78271	0.922016	0.0810635
A0A1D6NGC3	Ras-related protein RABA1f	ZEAMMB73_Zm00001d043935	Ras-related protein RABA1f OS=Zea mays OX=4577 GN=ZEAMMB73_Zm00001d043935 PE=4 SV=1 - [A0A1D6NGC3_MAIZE]	24.1562	5.51611	0.940727	0.15854
B6TFY4	40S ribosomal protein S27		40S ribosomal protein S27 OS=Zea mays OX=4577 PE=2 SV=1 - [B6TFY4_MAIZE]	9.55172	8.88037	0.972647	0.632076
B6T5Q6	Uncharacterized protein		Uncharacterized protein OS=Zea mays OX=4577 PE=2 SV=1 - [B6T5Q6_MAIZE]	23.032	6.39209	1.0834	0.121536
B4FEA2	Mitochondrial carnitine/acylcarnitine carrier-like protein	Zm00014a_037067	Mitochondrial carnitine/acylcarnitine carrier-like protein OS=Zea mays OX=4577 GN=Zm00014a_037067 PE=2 SV=1 - [B4FEA2_MAIZE]	30.137	9.51025	0.905936	0.0970469
A0A1D6GMN6	Heat shock 70 kDa protein	100285374	Heat shock 70 kDa protein OS=Zea mays OX=4577 GN=100285374 PE=3 SV=1 - [A0A1D6GMN6_MAIZE]	65.702	5.42725	1.19974	0.0567387
A0A1D6GJ75	Phosphoglucomutase2	ZEAMMB73_Zm00001d013428	Phosphoglucomutase2 OS=Zea mays OX=4577 GN=ZEAMMB73_Zm00001d013428 PE=3 SV=1 - [A0A1D6GJ75_MAIZE]	62.9137	5.71924	1.21578	0.174851
K7VX77	Phosphotransferase	ZEAMMB73_Zm00001d010796	Phosphotransferase OS=Zea mays OX=4577 GN=ZEAMMB73_Zm00001d010796 PE=3 SV=1 - [K7VX77_MAIZE]	54.8295	6.62451	1.04928	0.250973
B6U7D8	Cinnamyl alcohol dehydrogenase 2	CAD2	Cinnamyl alcohol dehydrogenase 2 OS=Zea mays OX=4577 GN=CAD2 PE=2 SV=1 - [B6U7D8_MAIZE]	38.7007	6.39209	1.36479	0.063627
B4FSK8	Cyclin-dependent kinases regulatory subunit	100280869	Cyclin-dependent kinases regulatory subunit OS=Zea mays OX=4577 GN=100280869 PE=2 SV=1 - [B4FSK8_MAIZE]	10.3733	9.08545	0.734693	0.0743774
C0PKT5	Tubulin alpha chain	ZEAMMB73_Zm00001d021891	Tubulin alpha chain OS=Zea mays OX=4577 GN=ZEAMMB73_Zm00001d021891 PE=2 SV=1 - [C0PKT5_MAIZE]	49.5674	5.05908	1.06705	0.195741
C0P4M0	Monodehydroascorbate reductase 1 peroxisomal	100382120	Monodehydroascorbate reductase 1 peroxisomal OS=Zea mays OX=4577 GN=100382120 PE=2 SV=1 - [C0P4M0_MAIZE]	46.442	5.8208	0.900905	0.338336
A0A1D6JXE6	LIM domain-containing protein WLIM2b	100281283	LIM domain-containing protein WLIM2b OS=Zea mays OX=4577 GN=100281283 PE=4 SV=1 - [A0A1D6JXE6_MAIZE]	15.7666	8.74854	1.7191	0.0642516
C0P4U7	Cytochrome-c oxidase	100284414	Cytochrome-c oxidase OS=Zea mays OX=4577 GN=100284414 PE=2 SV=1 - [C0P4U7_MAIZE]	7.67097	9.90576	0.960315	0.576616
K7VW90	Putative mediator of RNA polymerase II transcription subunit 37c	103635762	Putative mediator of RNA polymerase II transcription subunit 37c OS=Zea mays OX=4577 GN=103635762 PE=3 SV=1 - [K7VW90_MAIZE]	70.912	5.32568	1.01327	0.885878
B6SJC8	60S ribosomal protein L18	100194344	60S ribosomal protein L18 OS=Zea mays OX=4577 GN=100194344 PE=2 SV=1 - [B6SJC8_MAIZE]	21.1298	11.4292	1.07792	0.279041
B4FSZ7	Putative mitochondrial-processing peptidase subunit alpha-2 chloroplastic/mitochondrial	100856885	Putative mitochondrial-processing peptidase subunit alpha-2 chloroplastic/mitochondrial OS=Zea mays OX=4577 GN=100856885 PE=2 SV=1 - [B4FSZ7_MAIZE]	54.0605	6.63916	0.943994	0.0677184
B4FSF1	26S protease regulatory subunit 8 homolog B	100273032	26S protease regulatory subunit 8 homolog B OS=Zea mays OX=4577 GN=100273032 PE=2 SV=1 - [B4FSF1_MAIZE]	47.1708	8.85107	1.05116	0.425684
Q49HE1	12-oxo-phytodienoic acid reductase	OPR4	12-oxo-phytodienoic acid reductase OS=Zea mays OX=4577 GN=OPR4 PE=2 SV=1 - [Q49HE1_MAIZE]	42.1903	5.85889	1.02326	0.819775
C0P9R5	Outer envelope pore protein 24A chloroplastic	100382679	Outer envelope pore protein 24A chloroplastic OS=Zea mays OX=4577 GN=100382679 PE=2 SV=1 - [C0P9R5_MAIZE]	23.5672	9.23193	0.94146	0.504143
B6U666	Fructokinase-1	ZEAMMB73_Zm00001d012173	Fructokinase-1 OS=Zea mays OX=4577 GN=ZEAMMB73_Zm00001d012173 PE=2 SV=1 - [B6U666_MAIZE]	34.582	5.24951	0.886554	0.217665
B6TZV5	Uncharacterized protein	ZEAMMB73_Zm00001d024471	Uncharacterized protein OS=Zea mays OX=4577 GN=ZEAMMB73_Zm00001d024471 PE=2 SV=1 - [B6TZV5_MAIZE]	7.0877	9.99365	1.07434	0.594573
B6TFN1	Minor allergen Alt a 7	100283201	Minor allergen Alt a 7 OS=Zea mays OX=4577 GN=100283201 PE=2 SV=1 - [B6TFN1_MAIZE]	21.6559	6.69775	1.27842	0.0906804
A0A1D6EXF9	Harpin-induced protein	ZEAMMB73_Zm00001d006524	Harpin-induced protein OS=Zea mays OX=4577 GN=ZEAMMB73_Zm00001d006524 PE=4 SV=1 - [A0A1D6EXF9_MAIZE]	22.7094	8.92432	1.07826	0.530381
B4F9A4	Deoxymugineic acid synthase 1	DMAS1	Deoxymugineic acid synthase 1 OS=Zea mays OX=4577 GN=DMAS1 PE=1 SV=1 - [DMAS1_MAIZE]	35.3549	7.6499	0.938225	0.439035
A0A1D6JGD2	Plasma membrane ATPase	542052	Plasma membrane ATPase OS=Zea mays OX=4577 GN=542052 PE=3 SV=1 - [A0A1D6JGD2_MAIZE]	104.433	6.93213	1.07902	0.441065
B6TLU5	Lipid binding protein	100283788	Lipid binding protein OS=Zea mays OX=4577 GN=100283788 PE=2 SV=1 - [B6TLU5_MAIZE]	12.1403	8.95361	0.842987	0.116452
A0A1D6H3Y8	26S protease regulatory subunit S10B homolog B	100383510	26S protease regulatory subunit S10B homolog B OS=Zea mays OX=4577 GN=100383510 PE=3 SV=1 - [A0A1D6H3Y8_MAIZE]	30.1566	5.90967	1.17586	0.406632
C0P6Q4	Protein BTR1	542422	Protein BTR1 OS=Zea mays OX=4577 GN=542422 PE=2 SV=1 - [C0P6Q4_MAIZE]	37.0076	6.17627	0.955696	0.375927
C0HE38	U1 small nuclear ribonucleoprotein C		U1 small nuclear ribonucleoprotein C OS=Zea mays OX=4577 PE=2 SV=1 - [C0HE38_MAIZE]	14.4772	9.12939	0.864397	0.132738
B4FS49	T-complex protein 1 subunit epsilon	100272988	T-complex protein 1 subunit epsilon OS=Zea mays OX=4577 GN=100272988 PE=2 SV=1 - [B4FS49_MAIZE]	58.9616	5.74463	1.0922	0.144031
B6TMH0	60S ribosomal protein L27		60S ribosomal protein L27 OS=Zea mays OX=4577 PE=2 SV=1 - [B6TMH0_MAIZE]	15.5937	10.4771	1.25482	0.108783
B4FDZ6	Uncharacterized protein		Uncharacterized protein OS=Zea mays OX=4577 PE=2 SV=1 - [B4FDZ6_MAIZE]	17.5413	8.60205	1.13513	0.155054
B6T6D2	Dirigent protein	100282340	Dirigent protein OS=Zea mays OX=4577 GN=100282340 PE=2 SV=1 - [B6T6D2_MAIZE]	17.4341	6.29053	0.88593	0.0709879
B6T8M9	Mitochondrial prohibitin complex protein 2		Mitochondrial prohibitin complex protein 2 OS=Zea mays OX=4577 PE=2 SV=1 - [B6T8M9_MAIZE]	32.0912	9.80322	1.16302	0.0696712
B6THN2	RuBisCO large subunit-binding protein subunit beta		RuBisCO large subunit-binding protein subunit beta OS=Zea mays OX=4577 PE=2 SV=1 - [B6THN2_MAIZE]	64.4028	5.98584	1.02134	0.399906
B4FA63	Uncharacterized protein		Uncharacterized protein OS=Zea mays OX=4577 PE=2 SV=1 - [B4FA63_MAIZE]	65.383	6.72705	1.08382	0.475823
B4FW31	Orphans transcription factor	Orphan136	Orphans transcription factor OS=Zea mays OX=4577 GN=Orphan136 PE=2 SV=1 - [B4FW31_MAIZE]	31.1885	4.91943	1.0234	0.735147
B6SNL8	60S ribosomal protein L38	ZEAMMB73_Zm00001d052718	60S ribosomal protein L38 OS=Zea mays OX=4577 GN=ZEAMMB73_Zm00001d052718 PE=2 SV=1 - [B6SNL8_MAIZE]	8.05747	9.83252	0.920686	0.134966
B4FHI7	60S ribosomal protein L38		60S ribosomal protein L38 OS=Zea mays OX=4577 PE=2 SV=1 - [B4FHI7_MAIZE]	8.01646	10.0083	0.989014	0.379088
B6SIR7	Uncharacterized protein	100276911	Uncharacterized protein OS=Zea mays OX=4577 GN=100276911 PE=2 SV=1 - [B6SIR7_MAIZE]	17.768	8.14795	0.953601	0.615412
B4FZV6	Uncharacterized protein		Uncharacterized protein OS=Zea mays OX=4577 PE=2 SV=1 - [B4FZV6_MAIZE]	39.8005	8.23584	1.06495	0.298509
B6THG1	Legumin-like protein		Legumin-like protein OS=Zea mays OX=4577 PE=2 SV=1 - [B6THG1_MAIZE]	37.8485	6.15088	0.976822	0.629558
B4FEI6	Uncharacterized protein		Uncharacterized protein OS=Zea mays OX=4577 PE=2 SV=1 - [B4FEI6_MAIZE]	21.5131	7.00537	1.19547	0.318944
B6TU33	Rapid alkalinization factor 1		Rapid alkalinization factor 1 OS=Zea mays OX=4577 PE=2 SV=1 - [B6TU33_MAIZE]	13.3215	8.00146	0.615808	0.0546092
B6T7B6	Glutathione S-transferase, C-terminal-like		Glutathione S-transferase, C-terminal-like OS=Zea mays OX=4577 PE=2 SV=1 - [B6T7B6_MAIZE]	36.4994	6.62451	1.1356	0.289423
B4FID1	40S ribosomal protein S17-1	100194345	40S ribosomal protein S17-1 OS=Zea mays OX=4577 GN=100194345 PE=2 SV=1 - [B4FID1_MAIZE]	16.4478	10.1401	0.960129	0.689915
B4FSW0	40S ribosomal protein S10-1	ZEAMMB73_Zm00001d025413	40S ribosomal protein S10-1 OS=Zea mays OX=4577 GN=ZEAMMB73_Zm00001d025413 PE=2 SV=1 - [B4FSW0_MAIZE]	19.9261	9.77393	1.03477	0.666828
B8QUZ0	Chitinase	chiA	Chitinase OS=Zea mays subsp. parviglumis OX=76912 GN=chiA PE=4 SV=1 - [B8QUZ0_ZEAMP]	29.1436	7.79639	1.28303	0.0801147
C0PK59	Uncharacterized protein	100283310	Uncharacterized protein OS=Zea mays OX=4577 GN=100283310 PE=2 SV=1 - [C0PK59_MAIZE]	19.7485	9.92041	1.17651	0.060326
A0A1D6JWL5	Chorismate synthase	ZEAMMB73_Zm00001d028477	Chorismate synthase OS=Zea mays OX=4577 GN=ZEAMMB73_Zm00001d028477 PE=3 SV=1 - [A0A1D6JWL5_MAIZE]	33.1821	9.02686	0.918697	0.232634
K7VQG5	Phospholipase D	100280155	Phospholipase D OS=Zea mays OX=4577 GN=100280155 PE=3 SV=1 - [K7VQG5_MAIZE]	92.2272	5.69385	0.935502	0.329099
B6T0D7	Catalytic/ oxidoreductase, acting on NADH or NADPH	100284013	Catalytic/ oxidoreductase, acting on NADH or NADPH OS=Zea mays OX=4577 GN=100284013 PE=2 SV=1 - [B6T0D7_MAIZE]	11.504	8.646	0.979079	0.866023
A0A1D6H4C1	Citrate synthase	100279573	Citrate synthase OS=Zea mays OX=4577 GN=100279573 PE=3 SV=1 - [A0A1D6H4C1_MAIZE]	45.3785	7.59131	0.907775	0.487223
C0PJ26	Uncharacterized protein		Uncharacterized protein OS=Zea mays OX=4577 PE=2 SV=1 - [C0PJ26_MAIZE]	48.4915	5.80811	0.995694	0.868681
B4FM07	2-Cys peroxiredoxin BAS1 chloroplastic	100217217	2-Cys peroxiredoxin BAS1 chloroplastic OS=Zea mays OX=4577 GN=100217217 PE=2 SV=1 - [B4FM07_MAIZE]	28.1466	6.1001	1.29784	0.317905
C0HHQ5	Transmembrane protein 85	100381640	Transmembrane protein 85 OS=Zea mays OX=4577 GN=100381640 PE=2 SV=1 - [C0HHQ5_MAIZE]	18.8827	9.0415	0.994905	0.947649
B4FSA7	ADP,ATP carrier protein	100284305	ADP,ATP carrier protein OS=Zea mays OX=4577 GN=100284305 PE=2 SV=1 - [B4FSA7_MAIZE]	41.2381	9.80322	1.15398	0.075251
K7TFB6	ABA-responsive protein	100285725	ABA-responsive protein OS=Zea mays OX=4577 GN=100285725 PE=4 SV=1 - [K7TFB6_MAIZE]	29.1564	6.72705	1.71903	0.078758
B4FIB9	Uncharacterized protein	100194337	Uncharacterized protein OS=Zea mays OX=4577 GN=100194337 PE=2 SV=1 - [B4FIB9_MAIZE]	12.1073	10.1987	0.861898	0.133051
A0A1D6JIH7	Opaque endosperm7	ZEAMMB73_Zm00001d026649	Opaque endosperm7 OS=Zea mays OX=4577 GN=ZEAMMB73_Zm00001d026649 PE=4 SV=1 - [A0A1D6JIH7_MAIZE]	55.0987	6.72705	1.02775	0.678386
B6TB46	Prefoldin subunit 2	100282755	Prefoldin subunit 2 OS=Zea mays OX=4577 GN=100282755 PE=2 SV=1 - [B6TB46_MAIZE]	16.3554	6.06201	0.860268	0.0568258
K7W544	Putative carboxylesterase 2	100283424	Putative carboxylesterase 2 OS=Zea mays OX=4577 GN=100283424 PE=4 SV=1 - [K7W544_MAIZE]	35.0997	6.37939	1.11157	0.619459
A0A1D6H1J8	Glyceraldehyde-3-phosphate dehydrogenase	100282981	Glyceraldehyde-3-phosphate dehydrogenase OS=Zea mays OX=4577 GN=100282981 PE=3 SV=1 - [A0A1D6H1J8_MAIZE]	36.8237	7.47412	2.17299	0.0623241
A0A1D6MSE3	Dihydrolipoyl dehydrogenase	103650140	Dihydrolipoyl dehydrogenase OS=Zea mays OX=4577 GN=103650140 PE=3 SV=1 - [A0A1D6MSE3_MAIZE]	52.6627	7.72314	0.830978	0.677031
C4J9R0	PLAT domain-containing protein 3	ZEAMMB73_Zm00001d003457	PLAT domain-containing protein 3 OS=Zea mays OX=4577 GN=ZEAMMB73_Zm00001d003457 PE=2 SV=1 - [C4J9R0_MAIZE]	21.5986	6.87354	0.939386	0.25366
B4F972	Glutamate decarboxylase	100191549	Glutamate decarboxylase OS=Zea mays OX=4577 GN=100191549 PE=2 SV=1 - [B4F972_MAIZE]	55.1841	5.90967	1.10895	0.150413
Q9SAZ6	Phosphoenolpyruvate carboxylase2	Ppc1C	Phosphoenolpyruvate carboxylase2 OS=Zea mays OX=4577 GN=Ppc1C PE=2 SV=1 - [Q9SAZ6_MAIZE]	109.36	6.1001	1.05378	0.161983
B4FTA3	60S ribosomal protein L27	ZEAMMB73_Zm00001d036570	60S ribosomal protein L27 OS=Zea mays OX=4577 GN=ZEAMMB73_Zm00001d036570 PE=2 SV=1 - [B4FTA3_MAIZE]	15.5967	10.6382	1.1173	0.188694
B4FMY6	V-type proton ATPase subunit C	100281241	V-type proton ATPase subunit C OS=Zea mays OX=4577 GN=100281241 PE=2 SV=1 - [B4FMY6_MAIZE]	42.6808	5.64307	1.1088	0.521225
K7US39	Dihydrolipoyl dehydrogenase	100501719	Dihydrolipoyl dehydrogenase OS=Zea mays OX=4577 GN=100501719 PE=3 SV=1 - [K7US39_MAIZE]	52.6206	7.32764	0.962772	0.636844
A0A1D6HUU8	Plasma membrane ATPase	ZEAMMB73_Zm00001d019062	Plasma membrane ATPase OS=Zea mays OX=4577 GN=ZEAMMB73_Zm00001d019062 PE=3 SV=1 - [A0A1D6HUU8_MAIZE]	65.5852	5.88428	0.980074	0.726125
K7UP24	Glycosyltransferase	ZEAMMB73_Zm00001d048707	Glycosyltransferase OS=Zea mays OX=4577 GN=ZEAMMB73_Zm00001d048707 PE=3 SV=1 - [K7UP24_MAIZE]	49.425	5.70654	1.14057	0.229819
A0A1D6J6Y6	Peroxidase	100382033	Peroxidase OS=Zea mays OX=4577 GN=100382033 PE=3 SV=1 - [A0A1D6J6Y6_MAIZE]	36.3791	7.50342	0.843875	0.225672
B4FAD4	Isocitrate dehydrogenase [NAD] subunit, mitochondrial	100191841	Isocitrate dehydrogenase [NAD] subunit, mitochondrial OS=Zea mays OX=4577 GN=100191841 PE=2 SV=1 - [B4FAD4_MAIZE]	39.6994	6.97607	1.13056	0.0930065
Q41736	Ferredoxin-NADP reductase (Fragment)		Ferredoxin-NADP reductase (Fragment) OS=Zea mays OX=4577 PE=1 SV=1 - [Q41736_MAIZE]	36.3522	8.1626	1.13201	0.475343
A0A1D6PH52	ATP synthase subunit gamma	100274172	ATP synthase subunit gamma OS=Zea mays OX=4577 GN=100274172 PE=3 SV=1 - [A0A1D6PH52_MAIZE]	31.4723	8.47021	1.02362	0.49014
C0P8D8	Uncharacterized protein		Uncharacterized protein OS=Zea mays OX=4577 PE=2 SV=1 - [C0P8D8_MAIZE]	12.3003	8.20654	0.828249	0.0623934
B6SPB2	Flavoprotein wrbA	100280914	Flavoprotein wrbA OS=Zea mays OX=4577 GN=100280914 PE=2 SV=1 - [B6SPB2_MAIZE]	25.712	7.54736	1.03981	0.680968
B6SYU0	Histone H2A		Histone H2A OS=Zea mays OX=4577 PE=2 SV=1 - [B6SYU0_MAIZE]	16.4183	10.6089	1.10157	0.244266
B4FMH5	Histone H2A	103639303	Histone H2A OS=Zea mays OX=4577 GN=103639303 PE=2 SV=1 - [B4FMH5_MAIZE]	16.5044	10.6821	1.29643	0.0643696
A0A1D6E7V9	Malate synthase	ZEAMMB73_Zm00001d003247	Malate synthase OS=Zea mays OX=4577 GN=ZEAMMB73_Zm00001d003247 PE=3 SV=1 - [A0A1D6E7V9_MAIZE]	61.8053	6.72705	1.02318	0.67617
B4FAQ5	VIP1 protein	100191935	VIP1 protein OS=Zea mays OX=4577 GN=100191935 PE=2 SV=1 - [B4FAQ5_MAIZE]	21.1876	4.65283	0.926313	0.124616
A0A1D6LJS9	Chaperonin 60 subunit beta 2 chloroplastic	ZEAMMB73_Zm00001d035937	Chaperonin 60 subunit beta 2 chloroplastic OS=Zea mays OX=4577 GN=ZEAMMB73_Zm00001d035937 PE=3 SV=1 - [A0A1D6LJS9_MAIZE]	61.8128	5.49072	1.03106	0.504694
A0A1D6NT44	Sucrose synthase	542365	Sucrose synthase OS=Zea mays OX=4577 GN=542365 PE=3 SV=1 - [A0A1D6NT44_MAIZE]	89.855	6.63916	1.02382	0.632528
B6TMR7	THO complex subunit 4		THO complex subunit 4 OS=Zea mays OX=4577 PE=2 SV=1 - [B6TMR7_MAIZE]	26.7894	10.0522	1.03382	0.577343
C0HIT1	Peroxidase	PER56	Peroxidase OS=Zea mays OX=4577 GN=PER56 PE=2 SV=1 - [C0HIT1_MAIZE]	38.4868	9.05615	0.976458	0.554417
B4FMS7	Mitochondrial prohibitin complex protein 2	541818	Mitochondrial prohibitin complex protein 2 OS=Zea mays OX=4577 GN=541818 PE=2 SV=1 - [B4FMS7_MAIZE]	31.8962	9.68604	1.06362	0.263809
B6SPR5	Fb14	100285915	Fb14 OS=Zea mays OX=4577 GN=100285915 PE=2 SV=1 - [B6SPR5_MAIZE]	10.0228	8.104	1.21806	0.113743
B4F7V4	Ras-related protein Rab11A		Ras-related protein Rab11A OS=Zea mays OX=4577 PE=2 SV=1 - [B4F7V4_MAIZE]	23.579	6.21436	0.902667	0.131376
B6TH40	Ras-related protein Rab11C		Ras-related protein Rab11C OS=Zea mays OX=4577 PE=2 SV=1 - [B6TH40_MAIZE]	23.9452	6.56592	0.830911	0.0982613
A0A1D6HFX5	Bifunctional dTDP-4-dehydrorhamnose 35-epimerase/dTDP-4-dehydrorhamnose reductase	100286359	Bifunctional dTDP-4-dehydrorhamnose 35-epimerase/dTDP-4-dehydrorhamnose reductase OS=Zea mays OX=4577 GN=100286359 PE=4 SV=1 - [A0A1D6HFX5_MAIZE]	21.9291	7.73779	0.929499	0.0804882
A0A1D6IKV8	Peroxidase	ZEAMMB73_Zm00001d022280	Peroxidase OS=Zea mays OX=4577 GN=ZEAMMB73_Zm00001d022280 PE=3 SV=1 - [A0A1D6IKV8_MAIZE]	37.6176	6.96143	1.00893	0.910926
K7US97	Tyrosine-sulfated glycopeptide receptor 1	100284115	Tyrosine-sulfated glycopeptide receptor 1 OS=Zea mays OX=4577 GN=100284115 PE=3 SV=1 - [K7US97_MAIZE]	21.9392	11.5024	1.05732	0.220817
B6SPG4	Ubiquinol-cytochrome c reductase complex 8.0 kDa protein		Ubiquinol-cytochrome c reductase complex 8.0 kDa protein OS=Zea mays OX=4577 PE=2 SV=1 - [B6SPG4_MAIZE]	7.16768	7.25439	1.09234	0.410722
B4FBF6	Mitochondrial dicarboxylate/tricarboxylate transporter DTC	100274318	Mitochondrial dicarboxylate/tricarboxylate transporter DTC OS=Zea mays OX=4577 GN=100274318 PE=2 SV=1 - [B4FBF6_MAIZE]	33.1261	9.70068	1.10085	0.371333
A0A1X7YFG5	Uncharacterized protein		Uncharacterized protein OS=Zea mays OX=4577 PE=4 SV=1 - [A0A1X7YFG5_MAIZE]	37.3685	8.67529	0.967712	0.844
B6SRG5	Acyl-CoA-binding protein	100281027	Acyl-CoA-binding protein OS=Zea mays OX=4577 GN=100281027 PE=2 SV=1 - [B6SRG5_MAIZE]	9.95911	6.07471	0.858083	0.164858
K7VH58	Peroxidase	ZEAMMB73_Zm00001d046184	Peroxidase OS=Zea mays OX=4577 GN=ZEAMMB73_Zm00001d046184 PE=3 SV=1 - [K7VH58_MAIZE]	32.9195	8.20654	1.0457	0.651328
A0A1D6LVE5	Gibberellin receptor GID1L2	ZEAMMB73_Zm00001d037180	Gibberellin receptor GID1L2 OS=Zea mays OX=4577 GN=ZEAMMB73_Zm00001d037180 PE=4 SV=1 - [A0A1D6LVE5_MAIZE]	34.5824	6.37939	1.0094	0.493467
B6T8M6	Mitochondrial 2-oxoglutarate/malate carrier protein		Mitochondrial 2-oxoglutarate/malate carrier protein OS=Zea mays OX=4577 PE=2 SV=1 - [B6T8M6_MAIZE]	33.3822	9.70068	1.1785	0.149985
A0A1D6H6Z3	Dihydrolipoamide acetyltransferase component of pyruvate dehydrogenase complex	541781	Dihydrolipoamide acetyltransferase component of pyruvate dehydrogenase complex OS=Zea mays OX=4577 GN=541781 PE=3 SV=1 - [A0A1D6H6Z3_MAIZE]	42.435	6.01123	0.989498	0.89772
A0A1D6MN18	Fructose-bisphosphate aldolase	ZEAMMB73_Zm00001d040084	Fructose-bisphosphate aldolase OS=Zea mays OX=4577 GN=ZEAMMB73_Zm00001d040084 PE=3 SV=1 - [A0A1D6MN18_MAIZE]	41.6293	8.17725	0.850452	0.0916799
A0A1D6KFZ0	Sulfurtransferase	100275494	Sulfurtransferase OS=Zea mays OX=4577 GN=100275494 PE=4 SV=1 - [A0A1D6KFZ0_MAIZE]	43.1934	7.09326	0.966569	0.481644
B4FS03	Adenine phosphoribosyltransferase 1	ZEAMMB73_Zm00001d030895	Adenine phosphoribosyltransferase 1 OS=Zea mays OX=4577 GN=ZEAMMB73_Zm00001d030895 PE=2 SV=1 - [B4FS03_MAIZE]	19.3364	5.2749	1.06178	0.246773
A0A1D6KC46	Hsp20/alpha crystallin family protein	ZEAMMB73_Zm00001d030346	Hsp20/alpha crystallin family protein OS=Zea mays OX=4577 GN=ZEAMMB73_Zm00001d030346 PE=3 SV=1 - [A0A1D6KC46_MAIZE]	22.6059	9.29053	1.14748	0.0966599
A0A1D6H658	Peroxidase	ZEAMMB73_Zm00001d016185	Peroxidase OS=Zea mays OX=4577 GN=ZEAMMB73_Zm00001d016185 PE=3 SV=1 - [A0A1D6H658_MAIZE]	33.0896	8.07471	1.09685	0.175536
B4FBY6	Uncharacterized protein		Uncharacterized protein OS=Zea mays OX=4577 PE=2 SV=1 - [B4FBY6_MAIZE]	44.9722	4.70361	1.17571	0.262864
B6SI29	Histone H2A	100501869	Histone H2A OS=Zea mays OX=4577 GN=100501869 PE=2 SV=1 - [B6SI29_MAIZE]	16.2552	10.6089	1.05741	0.490627
O49161	Ubiquinol oxidase (Fragment)	Aox	Ubiquinol oxidase (Fragment) OS=Zea mays OX=4577 GN=Aox PE=3 SV=1 - [O49161_MAIZE]	17.0368	6.80029	0.862604	0.153483
B6SKA0	Glutathione S-transferase 1	ZEAMMB73_Zm00001d012675	Glutathione S-transferase 1 OS=Zea mays OX=4577 GN=ZEAMMB73_Zm00001d012675 PE=2 SV=1 - [B6SKA0_MAIZE]	23.7922	5.61768	0.936006	0.389531
K7UR93	Ubiquitin family protein	103654835	Ubiquitin family protein OS=Zea mays OX=4577 GN=103654835 PE=4 SV=1 - [K7UR93_MAIZE]	44.9429	5.17334	1.0787	0.122928
A0A1D6ECC9	Dihydrolipoyllysine-residue succinyltransferase component of 2-oxoglutarate dehydrogenase complex	100284269	Dihydrolipoyllysine-residue succinyltransferase component of 2-oxoglutarate dehydrogenase complex OS=Zea mays OX=4577 GN=100284269 PE=4 SV=1 - [A0A1D6ECC9_MAIZE]	39.6818	6.31592	1.03969	0.628967
C0P516	Aquaporin PIP2-4	ZEAMMB73_Zm00001d017288	Aquaporin PIP2-4 OS=Zea mays OX=4577 GN=ZEAMMB73_Zm00001d017288 PE=2 SV=1 - [C0P516_MAIZE]	30.3028	7.00537	1.04356	0.418432
Q30KV7	Cysteine proteinase inhibitor	cpi2	Cysteine proteinase inhibitor OS=Zea mays subsp. parviglumis OX=76912 GN=cpi2 PE=3 SV=1 - [Q30KV7_ZEAMP]	14.8429	6.80029	1.10008	0.384181
B4FKG6	Uncharacterized protein		Uncharacterized protein OS=Zea mays OX=4577 PE=2 SV=1 - [B4FKG6_MAIZE]	13.9923	9.15869	1.14424	0.590571
B6T8I3	Dirigent protein	100282529	Dirigent protein OS=Zea mays OX=4577 GN=100282529 PE=2 SV=1 - [B6T8I3_MAIZE]	17.5468	6.27783	1.20857	0.0872414
B6U1C4	Dynamin-related protein 1C		Dynamin-related protein 1C OS=Zea mays OX=4577 PE=2 SV=1 - [B6U1C4_MAIZE]	67.9726	8.23584	0.968304	0.564051
A0A1D6LSE3	Transducin/WD40 repeat-like superfamily protein	103629787	Transducin/WD40 repeat-like superfamily protein OS=Zea mays OX=4577 GN=103629787 PE=4 SV=1 - [A0A1D6LSE3_MAIZE]	32.0665	5.60498	1.04475	0.395564
B4F8V9	T-complex protein 1 subunit delta	100191456	T-complex protein 1 subunit delta OS=Zea mays OX=4577 GN=100191456 PE=2 SV=1 - [B4F8V9_MAIZE]	57.6096	7.21045	0.788245	0.0698971
B4G237	Histone H2A	ZEAMMB73_Zm00001d006547	Histone H2A OS=Zea mays OX=4577 GN=ZEAMMB73_Zm00001d006547 PE=2 SV=1 - [B4G237_MAIZE]	14.0356	10.0522	1.19953	0.192084
A0A1D6JLG7	NADH ubiquinone oxidoreductase B14 subunit5	ZEAMMB73_Zm00001d027389	NADH ubiquinone oxidoreductase B14 subunit5 OS=Zea mays OX=4577 GN=ZEAMMB73_Zm00001d027389 PE=4 SV=1 - [A0A1D6JLG7_MAIZE]	9.8111	10.2573	1.38757	0.249285
K7UU06	Calmodulin protein 2, touch-induced	ZEAMMB73_Zm00001d008573	Calmodulin protein 2, touch-induced OS=Zea mays OX=4577 GN=ZEAMMB73_Zm00001d008573 PE=4 SV=1 - [K7UU06_MAIZE]	21.1852	4.90674	1.03224	0.852146
A1XCH9	Lipoxygenase	LOX4	Lipoxygenase OS=Zea mays OX=4577 GN=LOX4 PE=2 SV=1 - [A1XCH9_MAIZE]	100.357	6.65381	1.03745	0.61432
K7UXK5	Putative alcohol dehydrogenase superfamily protein	ZEAMMB73_Zm00001d008377	Putative alcohol dehydrogenase superfamily protein OS=Zea mays OX=4577 GN=ZEAMMB73_Zm00001d008377 PE=4 SV=1 - [K7UXK5_MAIZE]	38.911	6.53662	0.976259	0.252472
B6SJN3	Protein mago nashi		Protein mago nashi OS=Zea mays OX=4577 PE=2 SV=1 - [B6SJN3_MAIZE]	18.7074	6.20166	0.972857	0.752047
A0A1D6LZY1	Heat shock protein 4	100217188	Heat shock protein 4 OS=Zea mays OX=4577 GN=100217188 PE=3 SV=1 - [A0A1D6LZY1_MAIZE]	92.3098	5.26221	1.05862	0.193235
A0A1D6MPA5	Sarcosine oxidase	ZEAMMB73_Zm00001d040228	Sarcosine oxidase OS=Zea mays OX=4577 GN=ZEAMMB73_Zm00001d040228 PE=4 SV=1 - [A0A1D6MPA5_MAIZE]	43.6431	6.91748	1.08288	0.159316
A0A1X7YE53	Uncharacterized protein		Uncharacterized protein OS=Zea mays OX=4577 PE=4 SV=1 - [A0A1X7YE53_MAIZE]	45.7087	5.85889	0.886524	0.0666031
B4F9J5	Glutamate dehydrogenase	542220	Glutamate dehydrogenase OS=Zea mays OX=4577 GN=542220 PE=2 SV=1 - [B4F9J5_MAIZE]	44.0416	6.39209	1.0716	0.302021
B4FFZ7	60S ribosomal protein L32-1	100280220	60S ribosomal protein L32-1 OS=Zea mays OX=4577 GN=100280220 PE=2 SV=1 - [B4FFZ7_MAIZE]	15.7577	10.4917	1.18759	0.0513911
A0A1D6QFJ7	Clathrin heavy chain	103654268	Clathrin heavy chain OS=Zea mays OX=4577 GN=103654268 PE=3 SV=1 - [A0A1D6QFJ7_MAIZE]	179.95	5.49072	1.00012	0.998912
A0A1D6IQ43	Clathrin heavy chain	ZEAMMB73_Zm00001d023218	Clathrin heavy chain OS=Zea mays OX=4577 GN=ZEAMMB73_Zm00001d023218 PE=3 SV=1 - [A0A1D6IQ43_MAIZE]	179.962	5.46533	1.1676	0.145297
B4F7S3	Aquaporin PIP1-5	ZEAMMB73_Zm00001d051872	Aquaporin PIP1-5 OS=Zea mays OX=4577 GN=ZEAMMB73_Zm00001d051872 PE=2 SV=1 - [B4F7S3_MAIZE]	30.7049	8.1626	1.03859	0.65528
C0PNV4	Uncharacterized protein		Uncharacterized protein OS=Zea mays OX=4577 PE=2 SV=1 - [C0PNV4_MAIZE]	50.1053	6.17627	0.968271	0.308083
A0A1D6QCG6	T-complex protein 1 subunit alpha	100283716	T-complex protein 1 subunit alpha OS=Zea mays OX=4577 GN=100283716 PE=3 SV=1 - [A0A1D6QCG6_MAIZE]	47.1078	5.90967	1.13698	0.322674
C0HIC4	40S ribosomal protein S21	103630203	40S ribosomal protein S21 OS=Zea mays OX=4577 GN=103630203 PE=2 SV=1 - [C0HIC4_MAIZE]	8.87246	7.44482	0.941046	0.271219
A0A1D6MV33	Plasma membrane ATPase	100502231	Plasma membrane ATPase OS=Zea mays OX=4577 GN=100502231 PE=3 SV=1 - [A0A1D6MV33_MAIZE]	105.405	6.63916	0.999561	0.993784
B4FNK8	Chorismate mutase	100272431	Chorismate mutase OS=Zea mays OX=4577 GN=100272431 PE=2 SV=1 - [B4FNK8_MAIZE]	34.8979	6.96143	1.02148	0.631082
B4FQH2	Trans-cinnamate 4-monooxygenase	100272756	Trans-cinnamate 4-monooxygenase OS=Zea mays OX=4577 GN=100272756 PE=2 SV=1 - [B4FQH2_MAIZE]	56.837	8.88037	0.948752	0.126876
A0A1D6F4V9	26S proteasome regulatory subunit 4 homolog A	ZEAMMB73_Zm00001d007215	26S proteasome regulatory subunit 4 homolog A OS=Zea mays OX=4577 GN=ZEAMMB73_Zm00001d007215 PE=3 SV=1 - [A0A1D6F4V9_MAIZE]	49.4499	6.21436	0.925995	0.0623843
A5HNY4	Profilin		Profilin OS=Zea mays OX=4577 PE=2 SV=1 - [A5HNY4_MAIZE]	14.255	5.17334	1.17448	0.0747159
A0A096PQR7	Allene oxide synthase 2	CYP74A2_1	Allene oxide synthase 2 OS=Zea mays OX=4577 GN=CYP74A2_1 PE=4 SV=1 - [A0A096PQR7_MAIZE]	53.0194	7.82568	1.65301	0.0520927
C4JBB8	Heat shock 70 kDa protein 9 mitochondrial	ZEAMMB73_Zm00001d006036	Heat shock 70 kDa protein 9 mitochondrial OS=Zea mays OX=4577 GN=ZEAMMB73_Zm00001d006036 PE=2 SV=1 - [C4JBB8_MAIZE]	72.6988	5.77002	1.19974	0.130336
B4FNT1	Elongation factor 1-beta	100282885	Elongation factor 1-beta OS=Zea mays OX=4577 GN=100282885 PE=2 SV=1 - [B4FNT1_MAIZE]	24.8374	4.52588	1.34695	0.0696612
B6TPG2	60S ribosomal protein L26-1	100285268	60S ribosomal protein L26-1 OS=Zea mays OX=4577 GN=100285268 PE=2 SV=1 - [B6TPG2_MAIZE]	17.5206	11.1216	1.00269	0.970449
B4FCH2	Histone H3	100192746	Histone H3 OS=Zea mays OX=4577 GN=100192746 PE=2 SV=1 - [B4FCH2_MAIZE]	15.3966	11.1509	0.802654	0.0776258
B4FPT7	Polyubiquitin 2	100282222	Polyubiquitin 2 OS=Zea mays OX=4577 GN=100282222 PE=2 SV=1 - [B4FPT7_MAIZE]	17.0912	6.06201	1.01338	0.768848
K7UPI1	Dirigent protein	103652771	Dirigent protein OS=Zea mays OX=4577 GN=103652771 PE=3 SV=1 - [K7UPI1_MAIZE]	20.1632	6.88818	1.18243	0.0643096
B6T9B3	2-cys peroxiredoxin BAS1		2-cys peroxiredoxin BAS1 OS=Zea mays OX=4577 PE=2 SV=1 - [B6T9B3_MAIZE]	28.2166	6.1001	0.910177	0.0806875
B6TXX0	Ribose-phosphate pyrophosphokinase 4	ZEAMMB73_Zm00001d017833	Ribose-phosphate pyrophosphokinase 4 OS=Zea mays OX=4577 GN=ZEAMMB73_Zm00001d017833 PE=2 SV=1 - [B6TXX0_MAIZE]	36.1708	7.07861	0.988309	0.811166
A0A1D6H287	4-coumarate--CoA ligase 1	542166	4-coumarate--CoA ligase 1 OS=Zea mays OX=4577 GN=542166 PE=4 SV=1 - [A0A1D6H287_MAIZE]	56.34	7.04932	0.991886	0.762365
A0A317Y4T0	Superoxide dismutase [Cu-Zn]	SODCP	Superoxide dismutase [Cu-Zn] OS=Zea mays OX=4577 GN=SODCP PE=3 SV=1 - [A0A317Y4T0_MAIZE]	17.8814	9.49561	1.14796	0.147974
K7V686	Eukaryotic translation initiation factor 3 subunit F	ZEAMMB73_Zm00001d011100	Eukaryotic translation initiation factor 3 subunit F OS=Zea mays OX=4577 GN=ZEAMMB73_Zm00001d011100 PE=3 SV=1 - [K7V686_MAIZE]	31.341	5.24951	0.828231	0.0978945
A0A317Y0Q6	Mitochondrial import inner membrane translocase subunit PAM16 like 2	PAM16L2_0	Mitochondrial import inner membrane translocase subunit PAM16 like 2 OS=Zea mays OX=4577 GN=PAM16L2_0 PE=4 SV=1 - [A0A317Y0Q6_MAIZE]	13.1347	9.30518	1.00448	0.970278
P93644	Phytase	phyS11	Phytase OS=Zea mays OX=4577 GN=phyS11 PE=2 SV=1 - [P93644_MAIZE]	41.4649	5.38916	1.10924	0.0505319
O49010	Herbicide safener binding protein	SBP1	Herbicide safener binding protein OS=Zea mays OX=4577 GN=SBP1 PE=2 SV=1 - [O49010_MAIZE]	40.2265	6.01123	1.04386	0.17156
A0A1D6MAK9	Phosphotransferase	ZEAMMB73_Zm00001d038792	Phosphotransferase OS=Zea mays OX=4577 GN=ZEAMMB73_Zm00001d038792 PE=3 SV=1 - [A0A1D6MAK9_MAIZE]	54.6573	6.60986	0.982026	0.691389
B4FTH5	Xyloglucan endotransglucosylase/hydrolase	100285134	Xyloglucan endotransglucosylase/hydrolase OS=Zea mays OX=4577 GN=100285134 PE=2 SV=1 - [B4FTH5_MAIZE]	31.9552	5.87158	0.985134	0.79707
B6U0V6	Endoplasmin		Endoplasmin OS=Zea mays OX=4577 PE=2 SV=1 - [B6U0V6_MAIZE]	92.774	4.97021	1.08832	0.326489
K7U9C9	Putative DEAD-box ATP-dependent RNA helicase family protein	ZEAMMB73_Zm00001d048924	Putative DEAD-box ATP-dependent RNA helicase family protein OS=Zea mays OX=4577 GN=ZEAMMB73_Zm00001d048924 PE=4 SV=1 - [K7U9C9_MAIZE]	64.5222	7.89893	0.993826	0.82773
B4FY83	Peroxidase	ZEAMMB73_Zm00001d009140	Peroxidase OS=Zea mays OX=4577 GN=ZEAMMB73_Zm00001d009140 PE=2 SV=1 - [B4FY83_MAIZE]	37.6288	5.51611	1.01265	0.772489
A0A1D6GXA2	Clathrin light chain 2	100277113	Clathrin light chain 2 OS=Zea mays OX=4577 GN=100277113 PE=4 SV=1 - [A0A1D6GXA2_MAIZE]	21.5404	9.5249	1.38664	0.143183
A0A317YHR9	Purple acid phosphatase	Zm00014a_008379	Purple acid phosphatase OS=Zea mays OX=4577 GN=Zm00014a_008379 PE=3 SV=1 - [A0A317YHR9_MAIZE]	70.1807	5.85889	1.05892	0.305916
B6TS21	Succinate--CoA ligase [ADP-forming] subunit beta, mitochondrial	100284286	Succinate--CoA ligase [ADP-forming] subunit beta, mitochondrial OS=Zea mays OX=4577 GN=100284286 PE=2 SV=1 - [B6TS21_MAIZE]	45.1647	6.31592	0.977788	0.637233
B4FZN6	40S ribosomal protein S7	100274227	40S ribosomal protein S7 OS=Zea mays OX=4577 GN=100274227 PE=2 SV=1 - [B4FZN6_MAIZE]	22.108	9.80322	1.0951	0.148144
A0A1D6JXW2	Protein TOC75-3 chloroplastic	100382028	Protein TOC75-3 chloroplastic OS=Zea mays OX=4577 GN=100382028 PE=4 SV=1 - [A0A1D6JXW2_MAIZE]	72.5408	7.66455	1.1068	0.29886
B6SZZ6	Non-specific lipid-transfer protein 2	100281901	Non-specific lipid-transfer protein 2 OS=Zea mays OX=4577 GN=100281901 PE=2 SV=1 - [B6SZZ6_MAIZE]	10.3953	8.5874	0.850982	0.293564
A0A1D6FYA6	Porin1	ZEAMMB73_Zm00001d011242	Porin1 OS=Zea mays OX=4577 GN=ZEAMMB73_Zm00001d011242 PE=4 SV=1 - [A0A1D6FYA6_MAIZE]	22.8136	7.12256	0.992966	0.920984
B6SWV1	Glucose-6-phosphate 1-dehydrogenase		Glucose-6-phosphate 1-dehydrogenase OS=Zea mays OX=4577 PE=2 SV=1 - [B6SWV1_MAIZE]	67.0143	8.1626	0.888685	0.104445
B4FMG0	Uncharacterized protein		Uncharacterized protein OS=Zea mays OX=4577 PE=2 SV=1 - [B4FMG0_MAIZE]	30.9437	6.60986	0.8601	0.0556787
B6TIG6	Transaminase/ transferase, transferring nitrogenous groups		Transaminase/ transferase, transferring nitrogenous groups OS=Zea mays OX=4577 PE=2 SV=1 - [B6TIG6_MAIZE]	49.6727	6.97607	1.04017	0.272956
B6UD55	NADH dehydrogenase [ubiquinone] 1 alpha subcomplex subunit 8-B	At5g18800_0	NADH dehydrogenase [ubiquinone] 1 alpha subcomplex subunit 8-B OS=Zea mays OX=4577 GN=At5g18800_0 PE=2 SV=1 - [B6UD55_MAIZE]	12.4189	6.50732	1.40255	0.204184
B4FB06	Uncharacterized protein		Uncharacterized protein OS=Zea mays OX=4577 PE=2 SV=1 - [B4FB06_MAIZE]	33.376	6.53662	1.08219	0.400895
A0A1D6LPQ0	Glycosyl hydrolase family 31 protein	103629642	Glycosyl hydrolase family 31 protein OS=Zea mays OX=4577 GN=103629642 PE=3 SV=1 - [A0A1D6LPQ0_MAIZE]	65.3501	7.06396	0.969078	0.531042
B6TGG3	ATP binding protein		ATP binding protein OS=Zea mays OX=4577 PE=2 SV=1 - [B6TGG3_MAIZE]	39.6143	6.60986	1.00192	0.936788
B4FZU8	Malate dehydrogenase	100274264	Malate dehydrogenase OS=Zea mays OX=4577 GN=100274264 PE=2 SV=1 - [B4FZU8_MAIZE]	35.2636	8.104	1.27416	0.209277
B4FRJ1	Malate dehydrogenase	100272900	Malate dehydrogenase OS=Zea mays OX=4577 GN=100272900 PE=2 SV=1 - [B4FRJ1_MAIZE]	35.6177	7.81104	1.27324	0.396622
C0PBG4	Glutathione peroxidase		Glutathione peroxidase OS=Zea mays OX=4577 PE=2 SV=1 - [C0PBG4_MAIZE]	12.168	5.50342	1.17041	0.613119
A0A1D6QLF5	ARM repeat superfamily protein	100194261	ARM repeat superfamily protein OS=Zea mays OX=4577 GN=100194261 PE=4 SV=1 - [A0A1D6QLF5_MAIZE]	43.5407	5.33838	1.19686	0.149496
A0A1D6IKK3	PLASMODESMATA CALLOSE-BINDING PROTEIN 5	100283720	PLASMODESMATA CALLOSE-BINDING PROTEIN 5 OS=Zea mays OX=4577 GN=100283720 PE=4 SV=1 - [A0A1D6IKK3_MAIZE]	15.1201	4.55127	1.22976	0.397758
C0HII8	Bowman-Birk type trypsin inhibitor	100274196	Bowman-Birk type trypsin inhibitor OS=Zea mays OX=4577 GN=100274196 PE=2 SV=1 - [C0HII8_MAIZE]	21.7188	6.0874	1.23716	0.482232
B6SQM6	Pathogenesis-related protein 10	100280981	Pathogenesis-related protein 10 OS=Zea mays OX=4577 GN=100280981 PE=2 SV=1 - [B6SQM6_MAIZE]	17.0158	5.21143	1.37183	0.14535
B4F8V5	NADH dehydrogenase [ubiquinone] iron-sulfur protein 1 mitochondrial	100191453	NADH dehydrogenase [ubiquinone] iron-sulfur protein 1 mitochondrial OS=Zea mays OX=4577 GN=100191453 PE=2 SV=1 - [B4F8V5_MAIZE]	80.628	6.49365	0.940244	0.104061
B6TIG4	Aspartyl-tRNA synthetase		Aspartyl-tRNA synthetase OS=Zea mays OX=4577 PE=2 SV=1 - [B6TIG4_MAIZE]	60.712	6.25244	1.03313	0.499525
B4FBH0	Peroxidase	100217011	Peroxidase OS=Zea mays OX=4577 GN=100217011 PE=2 SV=1 - [B4FBH0_MAIZE]	38.0136	7.94287	0.885416	0.177913
A0A1D6L210	NADH dehydrogenase [ubiquinone] iron-sulfur protein 1 mitochondrial	100280404	NADH dehydrogenase [ubiquinone] iron-sulfur protein 1 mitochondrial OS=Zea mays OX=4577 GN=100280404 PE=3 SV=1 - [A0A1D6L210_MAIZE]	80.666	6.37939	0.961073	0.485529
C0PFX0	Glucose-6-phosphate 1-dehydrogenase	100383421	Glucose-6-phosphate 1-dehydrogenase OS=Zea mays OX=4577 GN=100383421 PE=2 SV=1 - [C0PFX0_MAIZE]	58.587	7.13721	0.98925	0.853077
C4J929	Ribosomal protein	100502186	Ribosomal protein OS=Zea mays OX=4577 GN=100502186 PE=2 SV=1 - [C4J929_MAIZE]	24.5642	9.83252	0.951516	0.582663
B6SUK9	L-ornithine N5-acetyltransferase NATA1	100193115	L-ornithine N5-acetyltransferase NATA1 OS=Zea mays OX=4577 GN=100193115 PE=2 SV=1 - [B6SUK9_MAIZE]	24.1182	6.32861	0.925583	0.304581
A0A1D6ECL2	2-oxoglutarate dehydrogenase E1 component	100383579	2-oxoglutarate dehydrogenase E1 component OS=Zea mays OX=4577 GN=100383579 PE=4 SV=1 - [A0A1D6ECL2_MAIZE]	112.552	6.59521	1.00218	0.98443
B6TVN0	40S ribosomal protein S16	100284613	40S ribosomal protein S16 OS=Zea mays OX=4577 GN=100284613 PE=2 SV=1 - [B6TVN0_MAIZE]	16.8933	10.6968	1.06583	0.594699
B4FTM9	Uncharacterized protein	100283056	Uncharacterized protein OS=Zea mays OX=4577 GN=100283056 PE=2 SV=1 - [B4FTM9_MAIZE]	21.9091	4.729	0.892486	0.0600583
B6STB2	Cytochrome c oxidase subunit	100272303	Cytochrome c oxidase subunit OS=Zea mays OX=4577 GN=100272303 PE=2 SV=1 - [B6STB2_MAIZE]	9.03731	7.29834	0.900355	0.123123
B6TKX6	Pyruvate dehydrogenase E1 component subunit beta		Pyruvate dehydrogenase E1 component subunit beta OS=Zea mays OX=4577 PE=2 SV=1 - [B6TKX6_MAIZE]	39.8134	5.75732	0.964626	0.0551043
A0A1D6P5F8	Putative AMP-dependent synthetase and ligase superfamily protein	ZEAMMB73_Zm00001d046915	Putative AMP-dependent synthetase and ligase superfamily protein OS=Zea mays OX=4577 GN=ZEAMMB73_Zm00001d046915 PE=4 SV=1 - [A0A1D6P5F8_MAIZE]	46.0818	6.18896	0.934314	0.374649
A0A1D6I134	Enoyl-[acyl-carrier-protein] reductase [NADH] chloroplastic	100192829	Enoyl-[acyl-carrier-protein] reductase [NADH] chloroplastic OS=Zea mays OX=4577 GN=100192829 PE=4 SV=1 - [A0A1D6I134_MAIZE]	32.3508	5.77002	1.13214	0.290794
B4FIY7	NEDD8-conjugating enzyme Ubc12	100286302	NEDD8-conjugating enzyme Ubc12 OS=Zea mays OX=4577 GN=100286302 PE=2 SV=1 - [B4FIY7_MAIZE]	20.6155	8.23584	1.44774	0.0838331
Q6RW09	Allene oxide cyclase	aoc	Allene oxide cyclase OS=Zea mays OX=4577 GN=aoc PE=2 SV=1 - [Q6RW09_MAIZE]	25.7613	8.93896	1.0569	0.310121
B4FUX0	Allene oxide cyclase 3 chloroplastic	100273356	Allene oxide cyclase 3 chloroplastic OS=Zea mays OX=4577 GN=100273356 PE=2 SV=1 - [B4FUX0_MAIZE]	25.9863	9.21729	0.968797	0.505788
B6UH30	PEBP (Phosphatidylethanolamine-binding protein) family protein	100279044	PEBP (Phosphatidylethanolamine-binding protein) family protein OS=Zea mays OX=4577 GN=100279044 PE=2 SV=1 - [B6UH30_MAIZE]	18.7175	5.71924	0.951665	0.434669
A0A1D6QQD8	Acetyltransferase component of pyruvate dehydrogenase complex	ZEAMMB73_Zm00001d053580	Acetyltransferase component of pyruvate dehydrogenase complex OS=Zea mays OX=4577 GN=ZEAMMB73_Zm00001d053580 PE=3 SV=1 - [A0A1D6QQD8_MAIZE]	45.4596	5.85889	1.44782	0.055238
B6SJU3	Histone H2A	100501984	Histone H2A OS=Zea mays OX=4577 GN=100501984 PE=2 SV=1 - [B6SJU3_MAIZE]	16.1852	10.6089	1.11274	0.153294
A0A1D6N0U0	NADPH:quinone oxidoreductase	100282318	NADPH:quinone oxidoreductase OS=Zea mays OX=4577 GN=100282318 PE=4 SV=1 - [A0A1D6N0U0_MAIZE]	21.8673	6.55127	1.04666	0.516102
K7USN8	Gamma carbonic anhydrase 1 mitochondrial	103634649	Gamma carbonic anhydrase 1 mitochondrial OS=Zea mays OX=4577 GN=103634649 PE=4 SV=1 - [K7USN8_MAIZE]	28.4014	7.56201	1.17588	0.149731
B4FY98	Arogenate dehydrogenase 1 chloroplastic	100281038	Arogenate dehydrogenase 1 chloroplastic OS=Zea mays OX=4577 GN=100281038 PE=2 SV=1 - [B4FY98_MAIZE]	40.2476	8.76318	0.939181	0.272818
A0A1D6LNJ7	60S acidic ribosomal protein P3-2	103629584	60S acidic ribosomal protein P3-2 OS=Zea mays OX=4577 GN=103629584 PE=3 SV=1 - [A0A1D6LNJ7_MAIZE]	11.9845	4.4624	0.842137	0.0648977
A0A1D6PC23	Calcium-dependent phosphotriesterase superfamily protein	ZEAMMB73_Zm00001d047638	Calcium-dependent phosphotriesterase superfamily protein OS=Zea mays OX=4577 GN=ZEAMMB73_Zm00001d047638 PE=4 SV=1 - [A0A1D6PC23_MAIZE]	35.7025	8.32373	1.10011	0.178106
B6UDC2	Actin-interacting protein 1-2	100192950	Actin-interacting protein 1-2 OS=Zea mays OX=4577 GN=100192950 PE=2 SV=1 - [B6UDC2_MAIZE]	66.2454	6.82959	0.885468	0.500662
B4G1B0	Remorin family protein	100304007	Remorin family protein OS=Zea mays OX=4577 GN=100304007 PE=2 SV=1 - [B4G1B0_MAIZE]	21.8184	5.87158	1.40617	0.0529898
B6TAN8	Uncharacterized protein		Uncharacterized protein OS=Zea mays OX=4577 PE=2 SV=1 - [B6TAN8_MAIZE]	14.6565	8.42627	1.08553	0.100728
B4FDN9	V-type proton ATPase subunit D	100193069	V-type proton ATPase subunit D OS=Zea mays OX=4577 GN=100193069 PE=2 SV=1 - [B4FDN9_MAIZE]	29.1117	9.80322	1.01158	0.880922
B8A095	Acetylserotonin O-methyltransferase 1	ASMT1_0	Acetylserotonin O-methyltransferase 1 OS=Zea mays OX=4577 GN=ASMT1_0 PE=2 SV=1 - [B8A095_MAIZE]	40.5701	5.13525	1.02402	0.786798
A0A1D6H703	Aminopeptidase	ZEAMMB73_Zm00001d016373	Aminopeptidase OS=Zea mays OX=4577 GN=ZEAMMB73_Zm00001d016373 PE=3 SV=1 - [A0A1D6H703_MAIZE]	98.8226	5.61768	1.01169	0.547934
A0A1D6KXF9	Phenylalanine ammonia-lyase	ZEAMMB73_Zm00001d033286	Phenylalanine ammonia-lyase OS=Zea mays OX=4577 GN=ZEAMMB73_Zm00001d033286 PE=3 SV=1 - [A0A1D6KXF9_MAIZE]	75.61	6.21436	1.0912	0.511071
A0A1D6GYU6	Rho-related protein from plants 9	542094	Rho-related protein from plants 9 OS=Zea mays OX=4577 GN=542094 PE=4 SV=1 - [A0A1D6GYU6_MAIZE]	10.8039	9.5542	0.869376	0.27023
C0PGG5	Pyruvate kinase	542177	Pyruvate kinase OS=Zea mays OX=4577 GN=542177 PE=2 SV=1 - [C0PGG5_MAIZE]	54.9554	7.15186	1.01565	0.807464
A0A1D6NP54	RNA binding (RRM/RBD/RNP motifs) family protein	100274116	RNA binding (RRM/RBD/RNP motifs) family protein OS=Zea mays OX=4577 GN=100274116 PE=4 SV=1 - [A0A1D6NP54_MAIZE]	11.4044	6.56592	0.87318	0.68309
C0HEE6	Peroxidase	ZEAMMB73_Zm00001d020808	Peroxidase OS=Zea mays OX=4577 GN=ZEAMMB73_Zm00001d020808 PE=2 SV=1 - [C0HEE6_MAIZE]	37.9798	5.52881	0.890152	0.222628
B4FU52	Histone H2A	100273269	Histone H2A OS=Zea mays OX=4577 GN=100273269 PE=2 SV=1 - [B4FU52_MAIZE]	15.7139	10.6382	1.03369	0.482171
Q64HC1	ASF/SF2-like pre-mRNA splicing factor SRP32''	srp32	ASF/SF2-like pre-mRNA splicing factor SRP32'' OS=Zea mays OX=4577 GN=srp32 PE=4 SV=1 - [Q64HC1_MAIZE]	16.6502	8.17725	1.06576	0.40339
C4JBJ3	Calmodulin-7	100502442	Calmodulin-7 OS=Zea mays OX=4577 GN=100502442 PE=2 SV=1 - [C4JBJ3_MAIZE]	20.4501	4.91943	1.04079	0.414966
A0A1D6GPV2	3-ketoacyl-CoA thiolase 2 peroxisomal	ZEAMMB73_Zm00001d014093	3-ketoacyl-CoA thiolase 2 peroxisomal OS=Zea mays OX=4577 GN=ZEAMMB73_Zm00001d014093 PE=3 SV=1 - [A0A1D6GPV2_MAIZE]	44.9904	7.92822	0.910663	0.175202
B6TY47	UDP-glucuronic acid decarboxylase 1		UDP-glucuronic acid decarboxylase 1 OS=Zea mays OX=4577 PE=2 SV=1 - [B6TY47_MAIZE]	45.2686	9.40771	0.952775	0.174015
K7V763	Cytochrome c oxidase subunit 5b-2 mitochondrial	100277708	Cytochrome c oxidase subunit 5b-2 mitochondrial OS=Zea mays OX=4577 GN=100277708 PE=4 SV=1 - [K7V763_MAIZE]	17.8787	5.08447	1.05189	0.60338
A0A1D6GEX5	Short chain alcohol dehydrogenase1	100282128	Short chain alcohol dehydrogenase1 OS=Zea mays OX=4577 GN=100282128 PE=4 SV=1 - [A0A1D6GEX5_MAIZE]	29.3018	6.16357	0.965349	0.5248
B4FRG9	Uncharacterized protein		Uncharacterized protein OS=Zea mays OX=4577 PE=2 SV=1 - [B4FRG9_MAIZE]	18.9606	8.39697	1.06053	0.527656
A0A1D6GRB4	Alanine aminotransferase5	100216685	Alanine aminotransferase5 OS=Zea mays OX=4577 GN=100216685 PE=4 SV=1 - [A0A1D6GRB4_MAIZE]	52.8211	6.45557	0.990936	0.753617
B6UF45	Caffeoyl-CoA O-methyltransferase 1	100286151	Caffeoyl-CoA O-methyltransferase 1 OS=Zea mays OX=4577 GN=100286151 PE=2 SV=1 - [B6UF45_MAIZE]	27.2698	5.021	0.951597	0.402185
B4FRZ2	Pyridoxal 5'-phosphate synthase-like subunit PDX1.2	ZEAMMB73_Zm00001d018633	Pyridoxal 5'-phosphate synthase-like subunit PDX1.2 OS=Zea mays OX=4577 GN=ZEAMMB73_Zm00001d018633 PE=2 SV=1 - [B4FRZ2_MAIZE]	33.6042	6.55127	0.974064	0.612847
B4FBC9	Patellin-1	100192106	Patellin-1 OS=Zea mays OX=4577 GN=100192106 PE=2 SV=1 - [B4FBC9_MAIZE]	67.9934	4.58936	0.959733	0.355027
A0A1D6EAC4	L-ascorbate peroxidase S chloroplastic/mitochondrial	100194161	L-ascorbate peroxidase S chloroplastic/mitochondrial OS=Zea mays OX=4577 GN=100194161 PE=3 SV=1 - [A0A1D6EAC4_MAIZE]	30.5224	6.06201	0.993784	0.863303
B6U3Y1	Versicolorin reductase		Versicolorin reductase OS=Zea mays OX=4577 PE=2 SV=1 - [B6U3Y1_MAIZE]	26.9259	5.65576	1.14158	0.0513358
A0A1D6MUQ1	Beta-glucosidase 17	103650330	Beta-glucosidase 17 OS=Zea mays OX=4577 GN=103650330 PE=3 SV=1 - [A0A1D6MUQ1_MAIZE]	63.2609	6.53662	1.0187	0.79961
A0A1D6ESW5	Pyruvate dehydrogenase E1 component subunit beta	542483	Pyruvate dehydrogenase E1 component subunit beta OS=Zea mays OX=4577 GN=542483 PE=4 SV=1 - [A0A1D6ESW5_MAIZE]	37.454	5.22412	1.04073	0.190919
A0A1D6DWL5	3-oxoacyl-[acyl-carrier-protein] synthase III chloroplastic	100280714	3-oxoacyl-[acyl-carrier-protein] synthase III chloroplastic OS=Zea mays OX=4577 GN=100280714 PE=3 SV=1 - [A0A1D6DWL5_MAIZE]	34.6136	5.17334	0.959184	0.227253
A0A096PS68	54S ribosomal protein L51, mitochondrial	100282391	54S ribosomal protein L51, mitochondrial OS=Zea mays OX=4577 GN=100282391 PE=4 SV=1 - [A0A096PS68_MAIZE]	13.7524	10.5503	0.785346	0.0767837
K7U9P8	Methylthioribose-1-phosphate isomerase	ZEAMMB73_Zm00001d049042	Methylthioribose-1-phosphate isomerase OS=Zea mays OX=4577 GN=ZEAMMB73_Zm00001d049042 PE=3 SV=1 - [K7U9P8_MAIZE]	38.5982	6.04932	1.10171	0.179216
Q5XML0	Proteasome subunit beta		Proteasome subunit beta OS=Zea mays OX=4577 PE=2 SV=1 - [Q5XML0_MAIZE]	23.0728	5.64307	0.900253	0.228336
B7ZZR2	Uncharacterized protein		Uncharacterized protein OS=Zea mays OX=4577 PE=2 SV=1 - [B7ZZR2_MAIZE]	72.3954	6.75635	0.918178	0.314411
A0A1D6E8G3	Actin-7	ZEAMMB73_Zm00001d003298	Actin-7 OS=Zea mays OX=4577 GN=ZEAMMB73_Zm00001d003298 PE=3 SV=1 - [A0A1D6E8G3_MAIZE]	29.1175	5.60498	1.36691	0.147705
A0A1D6F5U0	Alpha-mannosidase	542217	Alpha-mannosidase OS=Zea mays OX=4577 GN=542217 PE=3 SV=1 - [A0A1D6F5U0_MAIZE]	113.707	6.29053	0.971886	0.442769
B4FFA7	Enoyl-[acyl-carrier-protein] reductase [NADH] chloroplastic	100193519	Enoyl-[acyl-carrier-protein] reductase [NADH] chloroplastic OS=Zea mays OX=4577 GN=100193519 PE=2 SV=1 - [B4FFA7_MAIZE]	38.9831	7.75244	0.98324	0.698265
B4FG60	Mitogen-activated protein kinase	103639280	Mitogen-activated protein kinase OS=Zea mays OX=4577 GN=103639280 PE=2 SV=1 - [B4FG60_MAIZE]	43.2657	5.84619	0.911388	0.154108
C0HJ97	Eukaryotic translation initiation factor 5A		Eukaryotic translation initiation factor 5A OS=Zea mays OX=4577 PE=2 SV=1 - [C0HJ97_MAIZE]	13.1367	7.09326	1.06272	0.640703
A0A1D6LKU0	Protein arginine N-methyltransferase PRMT10	100384449	Protein arginine N-methyltransferase PRMT10 OS=Zea mays OX=4577 GN=100384449 PE=3 SV=1 - [A0A1D6LKU0_MAIZE]	38.4201	5.88428	0.968132	0.570354
C0PL01	T-complex protein 1 subunit gamma	103654781	T-complex protein 1 subunit gamma OS=Zea mays OX=4577 GN=103654781 PE=2 SV=1 - [C0PL01_MAIZE]	60.6477	6.58057	0.868137	0.369745
A0A1D6JSN1	T-complex protein 1 subunit gamma	100285961	T-complex protein 1 subunit gamma OS=Zea mays OX=4577 GN=100285961 PE=3 SV=1 - [A0A1D6JSN1_MAIZE]	60.6949	6.68311	1.00465	0.895872
A0A1D6QCJ3	Splicing factor, arginine/serine-rich 7	100280612	Splicing factor, arginine/serine-rich 7 OS=Zea mays OX=4577 GN=100280612 PE=4 SV=1 - [A0A1D6QCJ3_MAIZE]	17.3216	10.521	1.09667	0.158678
A0A1D6FN98	Heat shock 70 kDa protein 14	ZEAMMB73_Zm00001d009948	Heat shock 70 kDa protein 14 OS=Zea mays OX=4577 GN=ZEAMMB73_Zm00001d009948 PE=3 SV=1 - [A0A1D6FN98_MAIZE]	92.2478	5.30029	1.00194	0.975197
A0A1D6FHT8	ATP-citrate synthase beta chain protein 2	ZEAMMB73_Zm00001d009127	ATP-citrate synthase beta chain protein 2 OS=Zea mays OX=4577 GN=ZEAMMB73_Zm00001d009127 PE=4 SV=1 - [A0A1D6FHT8_MAIZE]	65.934	7.6499	1.00173	0.983893
B6TDT6	Methylthioribose kinase		Methylthioribose kinase OS=Zea mays OX=4577 PE=2 SV=1 - [B6TDT6_MAIZE]	48.0813	6.22705	0.955793	0.405862
A0A0B4J3A7	DEAD-box ATP-dependent RNA helicase 34	103627913	DEAD-box ATP-dependent RNA helicase 34 OS=Zea mays OX=4577 GN=103627913 PE=3 SV=1 - [A0A0B4J3A7_MAIZE]	45.9307	6.3667	0.985559	0.562103
C0P827	Uncharacterized protein		Uncharacterized protein OS=Zea mays OX=4577 PE=2 SV=1 - [C0P827_MAIZE]	23.8647	5.74463	1.03518	0.406869
B4FW57	Uncharacterized protein		Uncharacterized protein OS=Zea mays OX=4577 PE=2 SV=1 - [B4FW57_MAIZE]	78.7602	5.51611	1.07678	0.441036
A0A1D6JG13	Cysteine protease 1	100283284	Cysteine protease 1 OS=Zea mays OX=4577 GN=100283284 PE=3 SV=1 - [A0A1D6JG13_MAIZE]	48.1505	5.23682	0.990534	0.940237
K7V9N5	20 kDa chaperonin chloroplastic	100191248	20 kDa chaperonin chloroplastic OS=Zea mays OX=4577 GN=100191248 PE=3 SV=1 - [K7V9N5_MAIZE]	19.8818	9.43701	0.970431	0.896689
B6TRH2	Sad1/unc-84-like protein 2		Sad1/unc-84-like protein 2 OS=Zea mays OX=4577 PE=2 SV=1 - [B6TRH2_MAIZE]	47.5024	7.95752	0.974616	0.254679
A0A1D6F1X1	Phospho-2-dehydro-3-deoxyheptonate aldolase	100501272	Phospho-2-dehydro-3-deoxyheptonate aldolase OS=Zea mays OX=4577 GN=100501272 PE=3 SV=1 - [A0A1D6F1X1_MAIZE]	58.962	8.41162	1.05757	0.623714
A0A1D6H6F1	Citrate synthase	ZEAMMB73_Zm00001d016248	Citrate synthase OS=Zea mays OX=4577 GN=ZEAMMB73_Zm00001d016248 PE=3 SV=1 - [A0A1D6H6F1_MAIZE]	55.2177	9.0415	0.943635	0.250523
B4FSG4	Jasmonate-induced protein	100283929	Jasmonate-induced protein OS=Zea mays OX=4577 GN=100283929 PE=2 SV=1 - [B4FSG4_MAIZE]	24.106	8.25049	1.29331	0.262339
B6TUB8	Phospho-2-dehydro-3-deoxyheptonate aldolase	100284499	Phospho-2-dehydro-3-deoxyheptonate aldolase OS=Zea mays OX=4577 GN=100284499 PE=2 SV=1 - [B6TUB8_MAIZE]	58.967	8.23584	1.20474	0.0867722
B6SIK5	B-cell receptor-associated 31-like	100284581	B-cell receptor-associated 31-like OS=Zea mays OX=4577 GN=100284581 PE=2 SV=1 - [B6SIK5_MAIZE]	15.166	8.66064	1.28296	0.168053
A0A1D6DZK3	Uncharacterized protein	ZEAMMB73_Zm00001d002325	Uncharacterized protein OS=Zea mays OX=4577 GN=ZEAMMB73_Zm00001d002325 PE=4 SV=1 - [A0A1D6DZK3_MAIZE]	31.589	4.86865	0.898945	0.363948
A0A1D6H7I2	RNA-binding (RRM/RBD/RNP motifs) family protein	100303796	RNA-binding (RRM/RBD/RNP motifs) family protein OS=Zea mays OX=4577 GN=100303796 PE=4 SV=1 - [A0A1D6H7I2_MAIZE]	11.1417	5.2749	1.01316	0.733894
K7TJV6	2-oxoglutarate dehydrogenase E1 component	100383847	2-oxoglutarate dehydrogenase E1 component OS=Zea mays OX=4577 GN=100383847 PE=4 SV=1 - [K7TJV6_MAIZE]	115.994	6.94678	1.12604	0.337434
B4FGH7	NADH dehydrogenase [ubiquinone] iron-sulfur protein 4 mitochondrial	100193844	NADH dehydrogenase [ubiquinone] iron-sulfur protein 4 mitochondrial OS=Zea mays OX=4577 GN=100193844 PE=2 SV=1 - [B4FGH7_MAIZE]	17.25	10.0376	1.29473	0.122776
B4FHK5	NPL4 family protein	100194136	NPL4 family protein OS=Zea mays OX=4577 GN=100194136 PE=2 SV=1 - [B4FHK5_MAIZE]	45.5606	5.46533	1.00083	0.981447
B6ST04	Beta-hexosaminidase		Beta-hexosaminidase OS=Zea mays OX=4577 PE=2 SV=1 - [B6ST04_MAIZE]	60.5286	6.18896	0.885796	0.0721528
C0P3B4	Pentatricopeptide repeat-containing protein	100381976	Pentatricopeptide repeat-containing protein OS=Zea mays OX=4577 GN=100381976 PE=2 SV=1 - [C0P3B4_MAIZE]	26.2191	6.16357	0.995239	0.935902
B4FTE1	Signal peptidase complex subunit 2		Signal peptidase complex subunit 2 OS=Zea mays OX=4577 PE=2 SV=1 - [B4FTE1_MAIZE]	21.1653	9.15869	0.969233	0.719925
B6TIL4	GDP-mannose 3,5-epimerase 2		GDP-mannose 3,5-epimerase 2 OS=Zea mays OX=4577 PE=2 SV=1 - [B6TIL4_MAIZE]	41.9658	6.46826	0.943404	0.525482
K7VXF0	Triacylglycerol lipase-like 1	100277743	Triacylglycerol lipase-like 1 OS=Zea mays OX=4577 GN=100277743 PE=4 SV=1 - [K7VXF0_MAIZE]	58.1932	8.57275	0.977168	0.388801
B6T3J9	PRA1 family protein	100282099	PRA1 family protein OS=Zea mays OX=4577 GN=100282099 PE=2 SV=1 - [B6T3J9_MAIZE]	20.6733	7.60596	0.88704	0.286297
B4FP94	Uncharacterized protein		Uncharacterized protein OS=Zea mays OX=4577 PE=2 SV=1 - [B4FP94_MAIZE]	47.4175	9.08545	1.12109	0.180926
A0A1D6HP40	Glutathione reductase cytosolic	100273659	Glutathione reductase cytosolic OS=Zea mays OX=4577 GN=100273659 PE=3 SV=1 - [A0A1D6HP40_MAIZE]	49.7067	6.87354	0.972453	0.497261
A0A1D6GPV8	RNA-binding (RRM/RBD/RNP motifs) family protein	100192006	RNA-binding (RRM/RBD/RNP motifs) family protein OS=Zea mays OX=4577 GN=100192006 PE=4 SV=1 - [A0A1D6GPV8_MAIZE]	17.0077	4.99561	1.24253	0.106246
C0PD50	Uncharacterized protein		Uncharacterized protein OS=Zea mays OX=4577 PE=2 SV=1 - [C0PD50_MAIZE]	43.992	7.79639	1.03525	0.487995
A0A1D6I1V3	Phosphoenolpyruvate carboxylase3	ZEAMMB73_Zm00001d020057	Phosphoenolpyruvate carboxylase3 OS=Zea mays OX=4577 GN=ZEAMMB73_Zm00001d020057 PE=3 SV=1 - [A0A1D6I1V3_MAIZE]	109.966	6.03662	1.01005	0.862961
C0P503	Uncharacterized protein		Uncharacterized protein OS=Zea mays OX=4577 PE=2 SV=1 - [C0P503_MAIZE]	33.9539	5.30029	1.01299	0.866436
B4FK56	Peroxidase	100216875	Peroxidase OS=Zea mays OX=4577 GN=100216875 PE=2 SV=1 - [B4FK56_MAIZE]	35.9752	8.32373	0.963302	0.549493
B4G066	Methylmalonate-semialdehyde dehydrogenase [acylating] mitochondrial	100274311	Methylmalonate-semialdehyde dehydrogenase [acylating] mitochondrial OS=Zea mays OX=4577 GN=100274311 PE=2 SV=1 - [B4G066_MAIZE]	57.4812	6.78564	1.07679	0.275063
A0A1D6F9P5	Syntaxin 132	100283000	Syntaxin 132 OS=Zea mays OX=4577 GN=100283000 PE=4 SV=1 - [A0A1D6F9P5_MAIZE]	28.6236	5.52881	0.885174	0.0744173
B4FPY4	Uncharacterized protein		Uncharacterized protein OS=Zea mays OX=4577 PE=2 SV=1 - [B4FPY4_MAIZE]	14.5537	7.97217	1.23597	0.175557
B4FPR9	Purple acid phosphatase	Zm00014a_009198	Purple acid phosphatase OS=Zea mays OX=4577 GN=Zm00014a_009198 PE=2 SV=1 - [B4FPR9_MAIZE]	38.7181	5.98584	0.949404	0.270838
B4FBP0	T-complex protein 1 subunit eta	100272855	T-complex protein 1 subunit eta OS=Zea mays OX=4577 GN=100272855 PE=2 SV=1 - [B4FBP0_MAIZE]	60.2622	7.38623	0.966757	0.583186
B6SHX8	Uncharacterized protein		Uncharacterized protein OS=Zea mays OX=4577 PE=2 SV=1 - [B6SHX8_MAIZE]	11.3807	4.79248	1.08966	0.200675
Q8W0V2	Lipoxygenase	542495	Lipoxygenase OS=Zea mays OX=4577 GN=542495 PE=3 SV=1 - [Q8W0V2_MAIZE]	96.4302	6.0874	1.01924	0.774017
K7VP18	Putative leucine-rich repeat receptor-like protein kinase family protein	103639428	Putative leucine-rich repeat receptor-like protein kinase family protein OS=Zea mays OX=4577 GN=103639428 PE=4 SV=1 - [K7VP18_MAIZE]	70.5034	7.04932	1.15789	0.166812
A0A1D6FWQ1	Peroxisomal membrane protein PEX14	100283640	Peroxisomal membrane protein PEX14 OS=Zea mays OX=4577 GN=100283640 PE=4 SV=1 - [A0A1D6FWQ1_MAIZE]	10.2924	8.54346	0.816692	0.574468
A0A317Y225	D-3-phosphoglycerate dehydrogenase	PGDH2	D-3-phosphoglycerate dehydrogenase OS=Zea mays OX=4577 GN=PGDH2 PE=3 SV=1 - [A0A317Y225_MAIZE]	65.2298	7.02002	0.925997	0.170147
A0A1D6L6U6	Glutathione transferase5	542734	Glutathione transferase5 OS=Zea mays OX=4577 GN=542734 PE=4 SV=1 - [A0A1D6L6U6_MAIZE]	25.242	6.58057	0.864595	0.0517597
B4FBD5	Uncharacterized protein		Uncharacterized protein OS=Zea mays OX=4577 PE=2 SV=1 - [B4FBD5_MAIZE]	40.4994	6.32861	1.00681	0.927889
A0A1D6N7A4	Acyl-coenzyme A oxidase	ZEAMMB73_Zm00001d042884	Acyl-coenzyme A oxidase OS=Zea mays OX=4577 GN=ZEAMMB73_Zm00001d042884 PE=3 SV=1 - [A0A1D6N7A4_MAIZE]	76.1462	7.56201	0.984677	0.507991
B4FAV4	Argininosuccinate lyase chloroplastic	100191977	Argininosuccinate lyase chloroplastic OS=Zea mays OX=4577 GN=100191977 PE=2 SV=1 - [B4FAV4_MAIZE]	57.5066	6.1001	0.992214	0.792603
B4G0U5	Pectin lyase-like superfamily protein	100284797	Pectin lyase-like superfamily protein OS=Zea mays OX=4577 GN=100284797 PE=2 SV=1 - [B4G0U5_MAIZE]	51.7117	6.78564	1.04801	0.584953
B4FCV1	NADH dehydrogenase [ubiquinone] 1 alpha subcomplex subunit 12	100192845	NADH dehydrogenase [ubiquinone] 1 alpha subcomplex subunit 12 OS=Zea mays OX=4577 GN=100192845 PE=2 SV=1 - [B4FCV1_MAIZE]	18.5234	9.02686	0.833311	0.052416
A0A1D6GIN6	Adenylyl cyclase-associated protein	100279338	Adenylyl cyclase-associated protein OS=Zea mays OX=4577 GN=100279338 PE=3 SV=1 - [A0A1D6GIN6_MAIZE]	51.2771	8.51416	1.26992	0.244032
A0A1D6JMZ9	Aconitate hydratase	100304277	Aconitate hydratase OS=Zea mays OX=4577 GN=100304277 PE=3 SV=1 - [A0A1D6JMZ9_MAIZE]	106.441	7.29834	0.972883	0.312171
C4J6C7	Nucleic acid-binding OB-fold-like protein	100282617	Nucleic acid-binding OB-fold-like protein OS=Zea mays OX=4577 GN=100282617 PE=2 SV=1 - [C4J6C7_MAIZE]	16.3351	5.23682	0.930179	0.199034
A0A1D6JRJ5	MFP1 attachment factor 1	100283333	MFP1 attachment factor 1 OS=Zea mays OX=4577 GN=100283333 PE=4 SV=1 - [A0A1D6JRJ5_MAIZE]	14.7674	4.83057	1.09138	0.171569
A0A1D6PR92	Uncharacterized protein	100279161	Uncharacterized protein OS=Zea mays OX=4577 GN=100279161 PE=4 SV=1 - [A0A1D6PR92_MAIZE]	6.49899	4.61475	1.46348	0.113967
B8A1K8	Ferredoxin		Ferredoxin OS=Zea mays OX=4577 PE=2 SV=1 - [B8A1K8_MAIZE]	10.4777	4.32275	1.27716	0.235743
B4FFM6	Tropinone reductase-like protein	100273624	Tropinone reductase-like protein OS=Zea mays OX=4577 GN=100273624 PE=2 SV=1 - [B4FFM6_MAIZE]	27.7703	6.354	0.88962	0.38746
B4FQX6	Vesicle-associated membrane protein 722	100191650	Vesicle-associated membrane protein 722 OS=Zea mays OX=4577 GN=100191650 PE=2 SV=1 - [B4FQX6_MAIZE]	24.864	8.86572	1.08796	0.0725724
B4FR72	Purple acid phosphatase	ZEAMMB73_Zm00001d046593	Purple acid phosphatase OS=Zea mays OX=4577 GN=ZEAMMB73_Zm00001d046593 PE=2 SV=1 - [B4FR72_MAIZE]	55.012	6.94678	0.98727	0.596789
A0A1D6H6Y2	Putative elongation factor 1-gamma 2	100381466	Putative elongation factor 1-gamma 2 OS=Zea mays OX=4577 GN=100381466 PE=4 SV=1 - [A0A1D6H6Y2_MAIZE]	47.015	6.72705	0.974042	0.0918031
C0PC61	Aldolase-type TIM barrel family protein	ZEAMMB73_Zm00001d042282	Aldolase-type TIM barrel family protein OS=Zea mays OX=4577 GN=ZEAMMB73_Zm00001d042282 PE=2 SV=1 - [C0PC61_MAIZE]	46.1922	7.82568	0.984006	0.795301
B4FT80	Nucleic acid-binding OB-fold-like protein	100283190	Nucleic acid-binding OB-fold-like protein OS=Zea mays OX=4577 GN=100283190 PE=2 SV=1 - [B4FT80_MAIZE]	18.2485	9.42236	1.05213	0.867451
C0P429	UTP--glucose-1-phosphate uridylyltransferase	100382295	UTP--glucose-1-phosphate uridylyltransferase OS=Zea mays OX=4577 GN=100382295 PE=2 SV=1 - [C0P429_MAIZE]	51.327	6.03662	1.15814	0.0592906
B4FRC2	V-type proton ATPase subunit H	ZEAMMB73_Zm00001d021721	V-type proton ATPase subunit H OS=Zea mays OX=4577 GN=ZEAMMB73_Zm00001d021721 PE=2 SV=1 - [B4FRC2_MAIZE]	51.5219	7.6499	0.935047	0.156797
A0A1D6HC37	High affinity nitrate transporter	ZEAMMB73_Zm00001d017095	High affinity nitrate transporter OS=Zea mays OX=4577 GN=ZEAMMB73_Zm00001d017095 PE=4 SV=1 - [A0A1D6HC37_MAIZE]	21.0669	8.98291	1.035	0.737299
B4FXV9	Uncharacterized protein		Uncharacterized protein OS=Zea mays OX=4577 PE=2 SV=1 - [B4FXV9_MAIZE]	13.2931	11.6489	1.33797	0.375985
B4FAR8	Proteasome subunit alpha type	100191947	Proteasome subunit alpha type OS=Zea mays OX=4577 GN=100191947 PE=2 SV=1 - [B4FAR8_MAIZE]	27.0507	6.21436	0.944023	0.212847
B8A187	Putative quinone-oxidoreductase homolog chloroplastic	ZEAMMB73_Zm00001d025166	Putative quinone-oxidoreductase homolog chloroplastic OS=Zea mays OX=4577 GN=ZEAMMB73_Zm00001d025166 PE=2 SV=1 - [B8A187_MAIZE]	35.2197	8.68994	1.06049	0.359817
A0A1D6I5B4	Cysteine proteinase 2	542451	Cysteine proteinase 2 OS=Zea mays OX=4577 GN=542451 PE=3 SV=1 - [A0A1D6I5B4_MAIZE]	25.477	5.36377	1.51138	0.0907759
B6T3F2	Histone H2A		Histone H2A OS=Zea mays OX=4577 PE=2 SV=1 - [B6T3F2_MAIZE]	14.4071	10.3892	1.03265	0.815637
B6UIQ0	Histone H2A		Histone H2A OS=Zea mays OX=4577 PE=2 SV=1 - [B6UIQ0_MAIZE]	14.1248	10.2427	0.951098	0.452328
K7VHJ4	Ras-related protein RABF1	100282900	Ras-related protein RABF1 OS=Zea mays OX=4577 GN=100282900 PE=4 SV=1 - [K7VHJ4_MAIZE]	16.8476	8.57275	1.01852	0.782575
B6SJ79	Mitochondrial NADH ubiquinone oxidoreductase 13kD-like subunit		Mitochondrial NADH ubiquinone oxidoreductase 13kD-like subunit OS=Zea mays OX=4577 PE=2 SV=1 - [B6SJ79_MAIZE]	11.6791	8.19189	0.78238	0.0650839
B4FYG9	Betaine aldehyde dehydrogenase 2 mitochondrial	100280838	Betaine aldehyde dehydrogenase 2 mitochondrial OS=Zea mays OX=4577 GN=100280838 PE=2 SV=1 - [B4FYG9_MAIZE]	19.402	4.79248	1.02739	0.655367
B4FTN5	Metal-dependent protein hydrolase	100273215	Metal-dependent protein hydrolase OS=Zea mays OX=4577 GN=100273215 PE=2 SV=1 - [B4FTN5_MAIZE]	42.6684	6.48096	1.00631	0.807333
B6TVB2	Uncharacterized protein		Uncharacterized protein OS=Zea mays OX=4577 PE=2 SV=1 - [B6TVB2_MAIZE]	10.3123	7.34229	1.06439	0.0700071
K7U777	High mobility group protein3	542455	High mobility group protein3 OS=Zea mays OX=4577 GN=542455 PE=4 SV=1 - [K7U777_MAIZE]	10.6168	4.61475	1.45024	0.0617854
B4G137	Ankyrin repeat domain-containing protein 2A	100274450	Ankyrin repeat domain-containing protein 2A OS=Zea mays OX=4577 GN=100274450 PE=2 SV=1 - [B4G137_MAIZE]	36.2272	4.61475	1.31857	0.0797279
A0A1D6FHV4	Peroxidase	ZEAMMB73_Zm00001d009138	Peroxidase OS=Zea mays OX=4577 GN=ZEAMMB73_Zm00001d009138 PE=3 SV=1 - [A0A1D6FHV4_MAIZE]	38.0974	8.44092	1.00568	0.922857
B6STE7	Ras-related protein Rab-6A		Ras-related protein Rab-6A OS=Zea mays OX=4577 PE=2 SV=1 - [B6STE7_MAIZE]	23.3129	7.13721	1.39018	0.223389
C0PBL7	Uncharacterized protein		Uncharacterized protein OS=Zea mays OX=4577 PE=2 SV=1 - [C0PBL7_MAIZE]	34.2256	5.50342	1.07566	0.467364
A0A1D6LKL1	Zinc finger (C3HC4-type RING finger) family protein	103629444	Zinc finger (C3HC4-type RING finger) family protein OS=Zea mays OX=4577 GN=103629444 PE=4 SV=1 - [A0A1D6LKL1_MAIZE]	68.952	6.21436	1.04014	0.493013
B4FK72	Peroxidase	100216881	Peroxidase OS=Zea mays OX=4577 GN=100216881 PE=2 SV=1 - [B4FK72_MAIZE]	36.9473	5.94775	1.0118	0.834049
C0PB60	Gamma carbonic anhydrase 2 mitochondrial	100382844	Gamma carbonic anhydrase 2 mitochondrial OS=Zea mays OX=4577 GN=100382844 PE=2 SV=1 - [C0PB60_MAIZE]	29.6255	7.12256	1.02949	0.848811
A0A1D6KCZ2	Alanine aminotransferase 2 mitochondrial	100193705	Alanine aminotransferase 2 mitochondrial OS=Zea mays OX=4577 GN=100193705 PE=4 SV=1 - [A0A1D6KCZ2_MAIZE]	52.757	6.46826	1.11246	0.210666
A0A1D6PN43	ATP-citrate synthase alpha chain protein 3	ZEAMMB73_Zm00001d048627	ATP-citrate synthase alpha chain protein 3 OS=Zea mays OX=4577 GN=ZEAMMB73_Zm00001d048627 PE=4 SV=1 - [A0A1D6PN43_MAIZE]	24.3803	6.07471	1.19609	0.252618
B6SUV6	Hypersensitive-induced response protein		Hypersensitive-induced response protein OS=Zea mays OX=4577 PE=2 SV=1 - [B6SUV6_MAIZE]	31.3751	5.45264	1.16485	0.277956
B6SJC1	RALF	100284232	RALF OS=Zea mays OX=4577 GN=100284232 PE=2 SV=1 - [B6SJC1_MAIZE]	12.6002	8.51416	1.00039	0.995056
C0PIF3	Uncharacterized protein		Uncharacterized protein OS=Zea mays OX=4577 PE=2 SV=1 - [C0PIF3_MAIZE]	44.5132	6.80029	1.03325	0.810112
B4FQM2	Pyrophosphate--fructose 6-phosphate 1-phosphotransferase subunit beta	100282190	Pyrophosphate--fructose 6-phosphate 1-phosphotransferase subunit beta OS=Zea mays OX=4577 GN=100282190 PE=2 SV=1 - [B4FQM2_MAIZE]	60.98	6.354	1.00668	0.89813
A0A317YJP0	Putative calcium-binding protein CML27	CML27_2	Putative calcium-binding protein CML27 OS=Zea mays OX=4577 GN=CML27_2 PE=4 SV=1 - [A0A317YJP0_MAIZE]	20.1759	4.65283	1.02133	0.734693
C0HGH8	Peroxidase	100381507	Peroxidase OS=Zea mays OX=4577 GN=100381507 PE=2 SV=1 - [C0HGH8_MAIZE]	33.6648	8.38232	1.27238	0.115586
A0A1D6HR38	Dirigent protein	ZEAMMB73_Zm00001d018629	Dirigent protein OS=Zea mays OX=4577 GN=ZEAMMB73_Zm00001d018629 PE=3 SV=1 - [A0A1D6HR38_MAIZE]	22.0485	6.65381	0.939595	0.45542
B4FUC4	Plasma membrane-associated cation-binding protein 1	100273295	Plasma membrane-associated cation-binding protein 1 OS=Zea mays OX=4577 GN=100273295 PE=2 SV=1 - [B4FUC4_MAIZE]	20.5959	5.04639	1.58571	0.050893
B4F987	Putative sarcosine oxidase	ZEAMMB73_Zm00001d020984	Putative sarcosine oxidase OS=Zea mays OX=4577 GN=ZEAMMB73_Zm00001d020984 PE=2 SV=1 - [B4F987_MAIZE]	43.9189	6.20166	0.998828	0.984498
A0A1D6M1V7	Signal peptidase I	100273903	Signal peptidase I OS=Zea mays OX=4577 GN=100273903 PE=3 SV=1 - [A0A1D6M1V7_MAIZE]	18.4506	6.26514	1.05248	0.668347
B6TM34	Xyloglucan endotransglucosylase/hydrolase		Xyloglucan endotransglucosylase/hydrolase OS=Zea mays OX=4577 PE=2 SV=1 - [B6TM34_MAIZE]	31.421	6.30322	1.0233	0.489566
B6TKK2	Gibberellin receptor GID1L2	100283680	Gibberellin receptor GID1L2 OS=Zea mays OX=4577 GN=100283680 PE=2 SV=1 - [B6TKK2_MAIZE]	38.3264	6.18896	1.07995	0.402007
B4FPA6	DNA-directed RNA polymerases I, II, and III 17.1 kDa polypeptide	100281008	DNA-directed RNA polymerases I, II, and III 17.1 kDa polypeptide OS=Zea mays OX=4577 GN=100281008 PE=2 SV=1 - [B4FPA6_MAIZE]	16.5582	5.04639	0.761604	0.225226
K7VCN5	Peroxidase	103635254	Peroxidase OS=Zea mays OX=4577 GN=103635254 PE=3 SV=1 - [K7VCN5_MAIZE]	36.5967	8.52881	1.07549	0.444045
A0A1D6H802	Inositol-tetrakisphosphate 1-kinase	103627151	Inositol-tetrakisphosphate 1-kinase OS=Zea mays OX=4577 GN=103627151 PE=3 SV=1 - [A0A1D6H802_MAIZE]	40.0927	5.73193	0.963382	0.535769
Q53CF4	Betaine aldehyde dehydrogenase		Betaine aldehyde dehydrogenase OS=Zea mays OX=4577 PE=2 SV=1 - [Q53CF4_MAIZE]	54.941	5.45264	1.39272	0.175542
A0A1D6L6B4	NADH dehydrogenase [ubiquinone] iron-sulfur protein 8-B mitochondrial	100283266	NADH dehydrogenase [ubiquinone] iron-sulfur protein 8-B mitochondrial OS=Zea mays OX=4577 GN=100283266 PE=3 SV=1 - [A0A1D6L6B4_MAIZE]	22.9752	5.04639	1.03913	0.336997
B6TAL4	12-oxophytodienoate reductase 3		12-oxophytodienoate reductase 3 OS=Zea mays OX=4577 PE=2 SV=1 - [B6TAL4_MAIZE]	44.2233	7.57666	1.0318	0.778194
B4FRK0	Uncharacterized protein		Uncharacterized protein OS=Zea mays OX=4577 PE=2 SV=1 - [B4FRK0_MAIZE]	16.4214	7.56201	0.944356	0.153953
A0A1D6FQX3	Proline-rich receptor-like protein kinase PERK1	ZEAMMB73_Zm00001d010421	Proline-rich receptor-like protein kinase PERK1 OS=Zea mays OX=4577 GN=ZEAMMB73_Zm00001d010421 PE=3 SV=1 - [A0A1D6FQX3_MAIZE]	48.3679	7.40088	0.969942	0.460595
A0A1D6L8F0	Dihydrolipoamide acetyltransferase component of pyruvate dehydrogenase complex	103644210	Dihydrolipoamide acetyltransferase component of pyruvate dehydrogenase complex OS=Zea mays OX=4577 GN=103644210 PE=3 SV=1 - [A0A1D6L8F0_MAIZE]	43.6508	5.37646	1.17028	0.0911429
B4FT32	Diaminopimelate decarboxylase 2 chloroplastic	100273126	Diaminopimelate decarboxylase 2 chloroplastic OS=Zea mays OX=4577 GN=100273126 PE=2 SV=1 - [B4FT32_MAIZE]	53.2575	8.06006	1.00008	0.999082
C0PNZ9	Uncharacterized protein		Uncharacterized protein OS=Zea mays OX=4577 PE=2 SV=1 - [C0PNZ9_MAIZE]	50.7802	6.7417	0.993927	0.908893
C4J4U3	GDSL esterase/lipase	100501638	GDSL esterase/lipase OS=Zea mays OX=4577 GN=100501638 PE=2 SV=1 - [C4J4U3_MAIZE]	39.4319	8.63135	1.43932	0.319807
A0A1D6LIU1	Histidine--tRNA ligase cytoplasmic	100279212	Histidine--tRNA ligase cytoplasmic OS=Zea mays OX=4577 GN=100279212 PE=4 SV=1 - [A0A1D6LIU1_MAIZE]	47.5539	5.96045	1.01825	0.718194
B6SLI2	RNA-binding protein 8A	100280761	RNA-binding protein 8A OS=Zea mays OX=4577 GN=100280761 PE=2 SV=1 - [B6SLI2_MAIZE]	21.9699	5.2876	0.905714	0.176742
B6UI57	Membrane magnesium transporter	100276290	Membrane magnesium transporter OS=Zea mays OX=4577 GN=100276290 PE=2 SV=1 - [B6UI57_MAIZE]	7.38681	6.25244	1.01142	0.887116
A0A1D6ES06	Caffeoyl-CoA O-methyltransferase 1	ZEAMMB73_Zm00001d005998	Caffeoyl-CoA O-methyltransferase 1 OS=Zea mays OX=4577 GN=ZEAMMB73_Zm00001d005998 PE=4 SV=1 - [A0A1D6ES06_MAIZE]	26.4698	5.22412	0.987572	0.810061
B4FF57	Uncharacterized protein		Uncharacterized protein OS=Zea mays OX=4577 PE=2 SV=1 - [B4FF57_MAIZE]	59.0778	6.68311	1.04275	0.350937
A0A1D6H0T6	26S proteasome non-ATPase regulatory subunit 2 homolog	100384330	26S proteasome non-ATPase regulatory subunit 2 homolog OS=Zea mays OX=4577 GN=100384330 PE=3 SV=1 - [A0A1D6H0T6_MAIZE]	96.9261	5.36377	1.00681	0.838333
B4FHT6	Ran BP2/NZF zinc finger-like superfamily protein	100194201	Ran BP2/NZF zinc finger-like superfamily protein OS=Zea mays OX=4577 GN=100194201 PE=2 SV=1 - [B4FHT6_MAIZE]	17.7928	8.25049	0.878127	0.31071
A0A1D6QMQ0	Nuclear speckle RNA-binding protein A	100382777	Nuclear speckle RNA-binding protein A OS=Zea mays OX=4577 GN=100382777 PE=4 SV=1 - [A0A1D6QMQ0_MAIZE]	17.1452	7.13721	0.952986	0.32395
K7TK09	Coatomer subunit delta	ZEAMMB73_Zm00001d023943	Coatomer subunit delta OS=Zea mays OX=4577 GN=ZEAMMB73_Zm00001d023943 PE=3 SV=1 - [K7TK09_MAIZE]	54.4699	5.42725	0.975416	0.435058
A0A1R3QP52	Glutathione transferase23	ZEAMMB73_Zm00001d020780	Glutathione transferase23 OS=Zea mays OX=4577 GN=ZEAMMB73_Zm00001d020780 PE=3 SV=1 - [A0A1R3QP52_MAIZE]	24.863	6.41748	0.911913	0.233153
A0A1D6J617	Double Clp-N motif-containing P-loop nucleoside triphosphate hydrolase superfamily protein	103641592	Double Clp-N motif-containing P-loop nucleoside triphosphate hydrolase superfamily protein OS=Zea mays OX=4577 GN=103641592 PE=3 SV=1 - [A0A1D6J617_MAIZE]	100.01	7.00537	0.841823	0.150415
A0A1D6FPA1	Transcription elongation factor 1 homolog	ZEAMMB73_Zm00001d010120	Transcription elongation factor 1 homolog OS=Zea mays OX=4577 GN=ZEAMMB73_Zm00001d010120 PE=3 SV=1 - [A0A1D6FPA1_MAIZE]	5.64955	3.97998	1.01428	0.730353
A0A1D6MK12	NADH-cytochrome b5 reductase-like protein	103649684	NADH-cytochrome b5 reductase-like protein OS=Zea mays OX=4577 GN=103649684 PE=4 SV=1 - [A0A1D6MK12_MAIZE]	19.4872	9.40771	0.921175	0.0831369
A0A1D6G305	Vesicle transport v-SNARE 12	100192626	Vesicle transport v-SNARE 12 OS=Zea mays OX=4577 GN=100192626 PE=4 SV=1 - [A0A1D6G305_MAIZE]	20.0632	7.88428	0.857845	0.6
B4FBF2	Carboxypeptidase	100273121	Carboxypeptidase OS=Zea mays OX=4577 GN=100273121 PE=2 SV=1 - [B4FBF2_MAIZE]	57.6026	5.88428	1.15339	0.467944
B4FW06	40S ribosomal protein S10-1	100273505	40S ribosomal protein S10-1 OS=Zea mays OX=4577 GN=100273505 PE=2 SV=1 - [B4FW06_MAIZE]	19.926	9.77393	0.85756	0.0711091
B6TN41	4-hydroxy-4-methyl-2-oxoglutarate aldolase	100283919	4-hydroxy-4-methyl-2-oxoglutarate aldolase OS=Zea mays OX=4577 GN=100283919 PE=2 SV=1 - [B6TN41_MAIZE]	18.1052	6.17627	0.978726	0.674116
B4FF65	26S proteasome non-ATPase regulatory subunit 11-like protein	100193485	26S proteasome non-ATPase regulatory subunit 11-like protein OS=Zea mays OX=4577 GN=100193485 PE=2 SV=1 - [B4FF65_MAIZE]	47.6741	6.3667	0.918063	0.20212
B6SME3	Uncharacterized protein		Uncharacterized protein OS=Zea mays OX=4577 PE=2 SV=1 - [B6SME3_MAIZE]	9.28969	8.26514	0.814227	0.114521
A0A317YDD4	Chalcone-flavonone isomerase family protein	CHI_0	Chalcone-flavonone isomerase family protein OS=Zea mays OX=4577 GN=CHI_0 PE=3 SV=1 - [A0A317YDD4_MAIZE]	23.9415	5.05908	1.05718	0.519592
A0A1D6FI72	Dihydrolipoyl dehydrogenase	100381818	Dihydrolipoyl dehydrogenase OS=Zea mays OX=4577 GN=100381818 PE=4 SV=1 - [A0A1D6FI72_MAIZE]	41.3708	8.74854	1.75735	0.120773
A0A1D6MS18	UDP-glucuronic acid decarboxylase 4	ZEAMMB73_Zm00001d040667	UDP-glucuronic acid decarboxylase 4 OS=Zea mays OX=4577 GN=ZEAMMB73_Zm00001d040667 PE=4 SV=1 - [A0A1D6MS18_MAIZE]	47.0352	8.68994	0.923009	0.296164
B4FWQ0	Dihydrolipoamide acetyltransferase component of pyruvate dehydrogenase complex		Dihydrolipoamide acetyltransferase component of pyruvate dehydrogenase complex OS=Zea mays OX=4577 PE=2 SV=1 - [B4FWQ0_MAIZE]	45.0837	5.97314	1.32882	0.113849
A0A1D6GEK0	40S ribosomal protein S23-2	ZEAMMB73_Zm00001d012978	40S ribosomal protein S23-2 OS=Zea mays OX=4577 GN=ZEAMMB73_Zm00001d012978 PE=3 SV=1 - [A0A1D6GEK0_MAIZE]	12.519	10.6675	1.17717	0.166557
A0A1D6IQ15	HXXXD-type acyl-transferase family protein	ZEAMMB73_Zm00001d023216	HXXXD-type acyl-transferase family protein OS=Zea mays OX=4577 GN=ZEAMMB73_Zm00001d023216 PE=4 SV=1 - [A0A1D6IQ15_MAIZE]	49.258	5.59229	0.93066	0.262401
B6SGX5	Uncharacterized protein	100274652	Uncharacterized protein OS=Zea mays OX=4577 GN=100274652 PE=2 SV=1 - [B6SGX5_MAIZE]	14.2715	6.91748	1.09362	0.415305
A0A1D6IKV7	Peroxidase	ZEAMMB73_Zm00001d022279	Peroxidase OS=Zea mays OX=4577 GN=ZEAMMB73_Zm00001d022279 PE=3 SV=1 - [A0A1D6IKV7_MAIZE]	36.6402	6.22705	1.04334	0.59231
B7ZXH0	Pyruvate kinase		Pyruvate kinase OS=Zea mays OX=4577 PE=2 SV=1 - [B7ZXH0_MAIZE]	50.3146	5.84619	0.940154	0.567335
K7VSH0	Methylesterase 3	103635265	Methylesterase 3 OS=Zea mays OX=4577 GN=103635265 PE=4 SV=1 - [K7VSH0_MAIZE]	28.2281	5.70654	1.08837	0.431223
B4FDY6	Proteasome subunit alpha type	100193140	Proteasome subunit alpha type OS=Zea mays OX=4577 GN=100193140 PE=2 SV=1 - [B4FDY6_MAIZE]	26.9927	6.91748	1.23763	0.0698885
C0PDJ1	Lipoxygenase		Lipoxygenase OS=Zea mays OX=4577 PE=2 SV=1 - [C0PDJ1_MAIZE]	90.6832	6.53662	1.08587	0.158933
A0A1D6HTN8	Xylanase inhibitor protein 1	ZEAMMB73_Zm00001d018965	Xylanase inhibitor protein 1 OS=Zea mays OX=4577 GN=ZEAMMB73_Zm00001d018965 PE=4 SV=1 - [A0A1D6HTN8_MAIZE]	32.9719	9.11475	0.950793	0.549752
B4FJT2	Uncharacterized protein	100216801	Uncharacterized protein OS=Zea mays OX=4577 GN=100216801 PE=2 SV=1 - [B4FJT2_MAIZE]	34.5598	9.27588	0.915847	0.0876665
A0A1D6JSD9	COP9 signalosome complex subunit 4	100192688	COP9 signalosome complex subunit 4 OS=Zea mays OX=4577 GN=100192688 PE=4 SV=1 - [A0A1D6JSD9_MAIZE]	28.814	5.2876	1.02275	0.846549
A0A1D6PAC2	Putative nucleolar protein 5-1	103639139	Putative nucleolar protein 5-1 OS=Zea mays OX=4577 GN=103639139 PE=4 SV=1 - [A0A1D6PAC2_MAIZE]	53.5292	6.82959	0.972215	0.619209
B4FRS6	VIP1 protein	100282630	VIP1 protein OS=Zea mays OX=4577 GN=100282630 PE=2 SV=1 - [B4FRS6_MAIZE]	25.5751	4.86865	0.916425	0.0584484
A0A1D6NVQ8	Putative pentatricopeptide repeat-containing protein mitochondrial	ZEAMMB73_Zm00001d045389	Putative pentatricopeptide repeat-containing protein mitochondrial OS=Zea mays OX=4577 GN=ZEAMMB73_Zm00001d045389 PE=4 SV=1 - [A0A1D6NVQ8_MAIZE]	35.0494	8.26514	1.00298	0.977787
B4FZ29	Argininosuccinate synthase chloroplastic	100274106	Argininosuccinate synthase chloroplastic OS=Zea mays OX=4577 GN=100274106 PE=2 SV=1 - [B4FZ29_MAIZE]	49.1061	7.13721	0.995554	0.819521
A0A1D6GZE4	Ribose-phosphate pyrophosphokinase	100272744	Ribose-phosphate pyrophosphokinase OS=Zea mays OX=4577 GN=100272744 PE=4 SV=1 - [A0A1D6GZE4_MAIZE]	22.2923	5.14795	0.773962	0.209595
B6T670	Uncharacterized protein		Uncharacterized protein OS=Zea mays OX=4577 PE=2 SV=1 - [B6T670_MAIZE]	19.9885	10.1694	1.14652	0.0818609
C0HEN0	Uncharacterized protein		Uncharacterized protein OS=Zea mays OX=4577 PE=2 SV=1 - [C0HEN0_MAIZE]	12.1292	5.0083	1.12694	0.42652
C0PII4	Uncharacterized protein		Uncharacterized protein OS=Zea mays OX=4577 PE=2 SV=1 - [C0PII4_MAIZE]	23.159	8.5874	1.02592	0.827444
B4FMP8	Uncharacterized protein		Uncharacterized protein OS=Zea mays OX=4577 PE=2 SV=1 - [B4FMP8_MAIZE]	32.2358	6.91748	1.13484	0.265323
B6TPA4	Carnitine racemase/ catalytic	100284027	Carnitine racemase/ catalytic OS=Zea mays OX=4577 GN=100284027 PE=2 SV=1 - [B6TPA4_MAIZE]	25.6413	8.44092	1.14219	0.177335
A0A1D6FRI4	ERBB-3 BINDING PROTEIN 1	ZEAMMB73_Zm00001d010500	ERBB-3 BINDING PROTEIN 1 OS=Zea mays OX=4577 GN=ZEAMMB73_Zm00001d010500 PE=4 SV=1 - [A0A1D6FRI4_MAIZE]	43.0653	7.1665	0.973483	0.769124
B4FXY5	Uncharacterized protein		Uncharacterized protein OS=Zea mays OX=4577 PE=2 SV=1 - [B4FXY5_MAIZE]	74.5825	6.69775	0.984026	0.530137
A0A1D6LSL9	Uncharacterized protein	103629808	Uncharacterized protein OS=Zea mays OX=4577 GN=103629808 PE=4 SV=1 - [A0A1D6LSL9_MAIZE]	7.53572	6.56592	0.957464	0.396615
A0A1D6FBU5	Phosphoadenosine phosphosulfate (PAPS) reductase family protein	100193543	Phosphoadenosine phosphosulfate (PAPS) reductase family protein OS=Zea mays OX=4577 GN=100193543 PE=4 SV=1 - [A0A1D6FBU5_MAIZE]	11.8488	7.07861	1.05023	0.309954
B4FT46	Safener induced1	ZEAMMB73_Zm00001d028693	Safener induced1 OS=Zea mays OX=4577 GN=ZEAMMB73_Zm00001d028693 PE=2 SV=1 - [B4FT46_MAIZE]	27.0027	4.98291	0.90213	0.135064
A0A1D6JIN2	GMP synthase [glutamine-hydrolyzing]	100383569	GMP synthase [glutamine-hydrolyzing] OS=Zea mays OX=4577 GN=100383569 PE=4 SV=1 - [A0A1D6JIN2_MAIZE]	53.9688	6.52197	1.01742	0.64051
A0A1D6IV85	Glycine-rich protein2	100284207	Glycine-rich protein2 OS=Zea mays OX=4577 GN=100284207 PE=4 SV=1 - [A0A1D6IV85_MAIZE]	14.6494	6.06201	1.18524	0.209136
B6TBW4	ERBB-3 BINDING PROTEIN 1	100282838	ERBB-3 BINDING PROTEIN 1 OS=Zea mays OX=4577 GN=100282838 PE=2 SV=1 - [B6TBW4_MAIZE]	43.2044	7.03467	1.03032	0.153249
K7TXJ5	Dirigent protein	ZEAMMB73_Zm00001d023570	Dirigent protein OS=Zea mays OX=4577 GN=ZEAMMB73_Zm00001d023570 PE=3 SV=1 - [K7TXJ5_MAIZE]	18.2862	6.94678	0.834136	0.0526879
B6UF19	Uncharacterized protein		Uncharacterized protein OS=Zea mays OX=4577 PE=2 SV=1 - [B6UF19_MAIZE]	9.27682	10.2427	1.19949	0.173294
A0A1D6FBE8	26S proteasome non-ATPase regulatory subunit 14-like protein	100217166	26S proteasome non-ATPase regulatory subunit 14-like protein OS=Zea mays OX=4577 GN=100217166 PE=4 SV=1 - [A0A1D6FBE8_MAIZE]	20.4828	8.80713	0.941743	0.66663
B4G1F0	ATP binding protein	100274496	ATP binding protein OS=Zea mays OX=4577 GN=100274496 PE=2 SV=1 - [B4G1F0_MAIZE]	41.5989	7.94287	0.977786	0.836671
C0P7U8	Uncharacterized protein		Uncharacterized protein OS=Zea mays OX=4577 PE=2 SV=1 - [C0P7U8_MAIZE]	21.3645	4.97021	1.06144	0.525448
B6TB61	DNA repair protein RAD23	100282762	DNA repair protein RAD23 OS=Zea mays OX=4577 GN=100282762 PE=2 SV=1 - [B6TB61_MAIZE]	42.1073	4.71631	0.948517	0.24388
B6T871	Lactoylglutathione lyase		Lactoylglutathione lyase OS=Zea mays OX=4577 PE=2 SV=1 - [B6T871_MAIZE]	15.0837	5.79541	0.858116	0.077242
A0A1D6F224	Non-specific lipid transfer protein-like 1	ZEAMMB73_Zm00001d006915	Non-specific lipid transfer protein-like 1 OS=Zea mays OX=4577 GN=ZEAMMB73_Zm00001d006915 PE=3 SV=1 - [A0A1D6F224_MAIZE]	13.7709	7.78174	2.18372	0.182787
A0A1D6F8K6	DEAD-box ATP-dependent RNA helicase 52	ZEAMMB73_Zm00001d007757	DEAD-box ATP-dependent RNA helicase 52 OS=Zea mays OX=4577 GN=ZEAMMB73_Zm00001d007757 PE=4 SV=1 - [A0A1D6F8K6_MAIZE]	67.948	8.54346	0.932145	0.429211
A0A1D6H9C0	Cytochrome b-c1 complex subunit Rieske, mitochondrial	100192468	Cytochrome b-c1 complex subunit Rieske, mitochondrial OS=Zea mays OX=4577 GN=100192468 PE=4 SV=1 - [A0A1D6H9C0_MAIZE]	29.3743	8.54346	0.854766	0.364977
B4F8X3	Acyl-coenzyme A oxidase	100191469	Acyl-coenzyme A oxidase OS=Zea mays OX=4577 GN=100191469 PE=2 SV=1 - [B4F8X3_MAIZE]	74.1589	7.53271	0.999591	0.997757
B6T9H3	Asparate aminotransferase		Asparate aminotransferase OS=Zea mays OX=4577 PE=2 SV=1 - [B6T9H3_MAIZE]	49.7833	5.64307	0.980493	0.81281
C0PEG0	V-type proton ATPase subunit H	103647744	V-type proton ATPase subunit H OS=Zea mays OX=4577 GN=103647744 PE=2 SV=1 - [C0PEG0_MAIZE]	51.3958	7.62061	1.1322	0.27817
A0A1D6HWS1	Dirigent protein	100282063	Dirigent protein OS=Zea mays OX=4577 GN=100282063 PE=3 SV=1 - [A0A1D6HWS1_MAIZE]	31.394	5.80811	0.997692	0.95873
B4G1H4	Rhomboid-like protein	100274505	Rhomboid-like protein OS=Zea mays OX=4577 GN=100274505 PE=2 SV=1 - [B4G1H4_MAIZE]	35.6795	8.5874	0.952944	0.682111
B8A312	Glucose-6-phosphate 1-epimerase	100280296	Glucose-6-phosphate 1-epimerase OS=Zea mays OX=4577 GN=100280296 PE=2 SV=1 - [B8A312_MAIZE]	37.4159	5.33838	0.979955	0.899639
Q5EUD6	Protein disulfide isomerase7	PDIL2-2	Protein disulfide isomerase7 OS=Zea mays OX=4577 GN=PDIL2-2 PE=2 SV=1 - [Q5EUD6_MAIZE]	40.0317	6.72705	1.38366	0.0879627
B6SRL2	Aconitate hydratase		Aconitate hydratase OS=Zea mays OX=4577 PE=2 SV=1 - [B6SRL2_MAIZE]	98.881	6.48096	1.07794	0.241034
A0A1D6EDD4	Pathogenesis-related protein 1	103646628	Pathogenesis-related protein 1 OS=Zea mays OX=4577 GN=103646628 PE=4 SV=1 - [A0A1D6EDD4_MAIZE]	20.3088	8.19189	0.963191	0.82284
A0A1D6QNT3	Uncharacterized protein	ZEAMMB73_Zm00001d053308	Uncharacterized protein OS=Zea mays OX=4577 GN=ZEAMMB73_Zm00001d053308 PE=3 SV=1 - [A0A1D6QNT3_MAIZE]	78.4254	8.90967	1.17494	0.111089
A0A1D6LZ57	USP family protein	ZEAMMB73_Zm00001d037573	USP family protein OS=Zea mays OX=4577 GN=ZEAMMB73_Zm00001d037573 PE=4 SV=1 - [A0A1D6LZ57_MAIZE]	18.0265	5.57959	1.24862	0.152443
C0PI43	Soluble epoxide hydrolase	100383654	Soluble epoxide hydrolase OS=Zea mays OX=4577 GN=100383654 PE=2 SV=1 - [C0PI43_MAIZE]	35.767	5.17334	0.906397	0.127453
A0A1D6M7J3	Glycosyltransferase	ZEAMMB73_Zm00001d038605	Glycosyltransferase OS=Zea mays OX=4577 GN=ZEAMMB73_Zm00001d038605 PE=3 SV=1 - [A0A1D6M7J3_MAIZE]	50.126	6.46826	0.974362	0.662228
B6U237	Heat shock 70 kDa protein 14	ZEAMMB73_Zm00001d009950	Heat shock 70 kDa protein 14 OS=Zea mays OX=4577 GN=ZEAMMB73_Zm00001d009950 PE=2 SV=1 - [B6U237_MAIZE]	93.5104	5.42725	0.974475	0.361618
B4FIH9	Xylose isomerase	100194385	Xylose isomerase OS=Zea mays OX=4577 GN=100194385 PE=2 SV=1 - [B4FIH9_MAIZE]	53.707	5.73193	0.899481	0.264509
A0A1D6HFD3	Tripeptidyl-peptidase 2	103627523	Tripeptidyl-peptidase 2 OS=Zea mays OX=4577 GN=103627523 PE=4 SV=1 - [A0A1D6HFD3_MAIZE]	136.319	5.99854	0.943586	0.13402
B4FSU1	Transmembrane emp24 domain-containing protein 10	100217126	Transmembrane emp24 domain-containing protein 10 OS=Zea mays OX=4577 GN=100217126 PE=2 SV=1 - [B4FSU1_MAIZE]	25.6971	8.26514	0.994285	0.761131
A0A1D6HRU4	Pathogenesis-related protein 1	103633658	Pathogenesis-related protein 1 OS=Zea mays OX=4577 GN=103633658 PE=4 SV=1 - [A0A1D6HRU4_MAIZE]	17.7936	5.19873	1.02313	0.861851
A0A1D6MPD2	Cysteine synthase	100272829	Cysteine synthase OS=Zea mays OX=4577 GN=100272829 PE=3 SV=1 - [A0A1D6MPD2_MAIZE]	33.5074	9.0708	1.31757	0.116347
A0A1D6HV53	Coatomer subunit gamma	100193726	Coatomer subunit gamma OS=Zea mays OX=4577 GN=100193726 PE=3 SV=1 - [A0A1D6HV53_MAIZE]	93.9034	5.05908	0.960006	0.520601
A0A317YK02	Uncharacterized protein	Zm00014a_026689	Uncharacterized protein OS=Zea mays OX=4577 GN=Zm00014a_026689 PE=3 SV=1 - [A0A317YK02_MAIZE]	10.2519	4.2085	1.07447	0.603014
B6SRE8	VAMP protein SEC22		VAMP protein SEC22 OS=Zea mays OX=4577 PE=2 SV=1 - [B6SRE8_MAIZE]	23.267	9.1001	0.846791	0.0509896
Q7XTK7	Vacuolar invertase (Fragment)	ivr2	Vacuolar invertase (Fragment) OS=Zea mays OX=4577 GN=ivr2 PE=3 SV=1 - [Q7XTK7_MAIZE]	53.2364	5.10986	0.882909	0.248169
B4FT85	Isochorismate synthase 1		Isochorismate synthase 1 OS=Zea mays OX=4577 PE=2 SV=1 - [B4FT85_MAIZE]	29.4524	8.22119	0.943098	0.058811
A0A1D6I2X6	Voltage-dependent anion channel protein1b	541795	Voltage-dependent anion channel protein1b OS=Zea mays OX=4577 GN=541795 PE=4 SV=1 - [A0A1D6I2X6_MAIZE]	29.6443	8.23584	1.08441	0.196567
A0A1Q0ZFB6	Alba DNA/RNA-binding protein	ZEAMMB73_Zm00001d013329	Alba DNA/RNA-binding protein OS=Zea mays OX=4577 GN=ZEAMMB73_Zm00001d013329 PE=4 SV=1 - [A0A1Q0ZFB6_MAIZE]	36.5361	9.30518	1.07091	0.285981
B6TJT9	Uncharacterized protein		Uncharacterized protein OS=Zea mays OX=4577 PE=2 SV=1 - [B6TJT9_MAIZE]	30.643	5.32568	0.92424	0.248492
B6UEB0	Bifunctional inhibitor/lipid-transfer protein/seed storage 2S albumin superfamily protein	100286092	Bifunctional inhibitor/lipid-transfer protein/seed storage 2S albumin superfamily protein OS=Zea mays OX=4577 GN=100286092 PE=2 SV=1 - [B6UEB0_MAIZE]	11.3546	8.1333	1.21354	0.127939
B4G037	Uncharacterized protein		Uncharacterized protein OS=Zea mays OX=4577 PE=2 SV=1 - [B4G037_MAIZE]	22.9955	8.17725	0.93168	0.174926
B4FD74	Isoflavone reductase-like1	542717	Isoflavone reductase-like1 OS=Zea mays OX=4577 GN=542717 PE=2 SV=1 - [B4FD74_MAIZE]	32.9074	5.75732	0.984665	0.841336
A0A317YF40	4-coumarate--CoA ligase-like 4	4CLL4	4-coumarate--CoA ligase-like 4 OS=Zea mays OX=4577 GN=4CLL4 PE=4 SV=1 - [A0A317YF40_MAIZE]	59.4757	8.98291	1.00361	0.85326
B6TQ06	Aminomethyltransferase	100279332	Aminomethyltransferase OS=Zea mays OX=4577 GN=100279332 PE=2 SV=1 - [B6TQ06_MAIZE]	44.0065	8.1626	1.06861	0.0739224
A0A1D6QQ56	KH domain-containing protein	100279814	KH domain-containing protein OS=Zea mays OX=4577 GN=100279814 PE=4 SV=1 - [A0A1D6QQ56_MAIZE]	39.1267	9.02686	1.06551	0.0749047
A0A317Y673	Polyadenylate-binding protein RBP47B	RBP47B'	Polyadenylate-binding protein RBP47B OS=Zea mays OX=4577 GN=RBP47B' PE=4 SV=1 - [A0A317Y673_MAIZE]	40.467	6.18896	1.05033	0.582251
B6SMX7	4-hydroxy-4-methyl-2-oxoglutarate aldolase	ZEAMMB73_Zm00001d039841	4-hydroxy-4-methyl-2-oxoglutarate aldolase OS=Zea mays OX=4577 GN=ZEAMMB73_Zm00001d039841 PE=2 SV=1 - [B6SMX7_MAIZE]	17.9411	5.88428	1.21332	0.0851788
B6TPZ1	Uncharacterized protein	100277149	Uncharacterized protein OS=Zea mays OX=4577 GN=100277149 PE=2 SV=1 - [B6TPZ1_MAIZE]	8.81236	9.62744	1.18698	0.101868
B6SZK9	Coatomer subunit epsilon		Coatomer subunit epsilon OS=Zea mays OX=4577 PE=2 SV=1 - [B6SZK9_MAIZE]	31.4031	5.57959	0.941979	0.0847678
A0A1D6F4G1	Eukaryotic translation initiation factor 2 subunit beta	100193916	Eukaryotic translation initiation factor 2 subunit beta OS=Zea mays OX=4577 GN=100193916 PE=4 SV=1 - [A0A1D6F4G1_MAIZE]	23.3929	8.52881	0.89759	0.0685929
B4FTY8	Harpin inducing protein	ZEAMMB73_Zm00001d026662	Harpin inducing protein OS=Zea mays OX=4577 GN=ZEAMMB73_Zm00001d026662 PE=2 SV=1 - [B4FTY8_MAIZE]	21.9952	8.47021	0.871031	0.354617
B6SII8	CCAAT-HAP5 transcription factor	100282924	CCAAT-HAP5 transcription factor OS=Zea mays OX=4577 GN=100282924 PE=2 SV=1 - [B6SII8_MAIZE]	21.3268	5.59229	1.11648	0.228187
A0A1D6HGR1	p-loop containing nucleoside triphosphate hydrolase superfamily protein	100501892	p-loop containing nucleoside triphosphate hydrolase superfamily protein OS=Zea mays OX=4577 GN=100501892 PE=4 SV=1 - [A0A1D6HGR1_MAIZE]	71.5914	9.34912	1.01674	0.806485
A0A1D6HPY9	ABC transporter F family member 3	100192636	ABC transporter F family member 3 OS=Zea mays OX=4577 GN=100192636 PE=4 SV=1 - [A0A1D6HPY9_MAIZE]	65.6737	6.27783	1.03434	0.598696
B7ZZT3	Uncharacterized protein		Uncharacterized protein OS=Zea mays OX=4577 PE=2 SV=1 - [B7ZZT3_MAIZE]	23.9258	6.69775	1.06862	0.592599
A0A1D6FQV1	Uncharacterized protein	ZEAMMB73_Zm00001d010413	Uncharacterized protein OS=Zea mays OX=4577 GN=ZEAMMB73_Zm00001d010413 PE=4 SV=1 - [A0A1D6FQV1_MAIZE]	109.777	6.85889	1.05609	0.127064
A0A1D6IL83	NADH dehydrogenase [ubiquinone] flavoprotein 1, mitochondrial	ZEAMMB73_Zm00001d022341	NADH dehydrogenase [ubiquinone] flavoprotein 1, mitochondrial OS=Zea mays OX=4577 GN=ZEAMMB73_Zm00001d022341 PE=3 SV=1 - [A0A1D6IL83_MAIZE]	44.7766	7.40088	0.994374	0.96808
A0A1D6I087	Short-chain dehydrogenase TIC 32 chloroplastic	100217007	Short-chain dehydrogenase TIC 32 chloroplastic OS=Zea mays OX=4577 GN=100217007 PE=3 SV=1 - [A0A1D6I087_MAIZE]	25.5372	7.6792	0.836805	0.133597
B6TWL4	26S proteasome non-ATPase regulatory subunit 11		26S proteasome non-ATPase regulatory subunit 11 OS=Zea mays OX=4577 PE=2 SV=1 - [B6TWL4_MAIZE]	47.6281	5.84619	0.891591	0.0560419
O24478	B-keto acyl reductase	glossy8	B-keto acyl reductase OS=Zea mays OX=4577 GN=glossy8 PE=2 SV=1 - [O24478_MAIZE]	35.392	9.83252	0.966519	0.302232
A0A1D6LLS4	2-oxoglutarate dehydrogenase E1 component	ZEAMMB73_Zm00001d036328	2-oxoglutarate dehydrogenase E1 component OS=Zea mays OX=4577 GN=ZEAMMB73_Zm00001d036328 PE=4 SV=1 - [A0A1D6LLS4_MAIZE]	114.739	7.21045	1.03665	0.502918
A0A317Y7K8	Coatomer subunit alpha	Zm00014a_026693	Coatomer subunit alpha OS=Zea mays OX=4577 GN=Zm00014a_026693 PE=4 SV=1 - [A0A317Y7K8_MAIZE]	136.256	6.90283	0.935901	0.052313
A0A1D6EP60	Serine carboxypeptidase-like 19	100284785	Serine carboxypeptidase-like 19 OS=Zea mays OX=4577 GN=100284785 PE=3 SV=1 - [A0A1D6EP60_MAIZE]	27.1095	8.1626	1.04412	0.630981
B6TQL1	Uncharacterized protein		Uncharacterized protein OS=Zea mays OX=4577 PE=2 SV=1 - [B6TQL1_MAIZE]	10.9259	10.2427	0.860604	0.316306
A0A1D6GJB2	Coatomer subunit alpha-1	ZEAMMB73_Zm00001d013441	Coatomer subunit alpha-1 OS=Zea mays OX=4577 GN=ZEAMMB73_Zm00001d013441 PE=4 SV=1 - [A0A1D6GJB2_MAIZE]	85.381	8.93896	0.929476	0.701845
B6UIM1	Nuclear cap-binding protein subunit 2		Nuclear cap-binding protein subunit 2 OS=Zea mays OX=4577 PE=2 SV=1 - [B6UIM1_MAIZE]	23.6292	5.50342	1.1202	0.474726
B4FAJ4	Uncharacterized protein		Uncharacterized protein OS=Zea mays OX=4577 PE=2 SV=1 - [B4FAJ4_MAIZE]	60.2192	6.48096	1.17879	0.0773381
A0A1D6LR95	Zinc finger CCCH domain-containing protein 52	100191993	Zinc finger CCCH domain-containing protein 52 OS=Zea mays OX=4577 GN=100191993 PE=4 SV=1 - [A0A1D6LR95_MAIZE]	24.3199	9.14404	1.02806	0.466729
K7VI04	Glutamate--cysteine ligase chloroplastic	100381846	Glutamate--cysteine ligase chloroplastic OS=Zea mays OX=4577 GN=100381846 PE=4 SV=1 - [K7VI04_MAIZE]	56.9041	7.79639	1.13468	0.134159
A0A1D6GWL4	GDSL esterase/lipase	103626463	GDSL esterase/lipase OS=Zea mays OX=4577 GN=103626463 PE=4 SV=1 - [A0A1D6GWL4_MAIZE]	39.7584	8.98291	0.784318	0.483422
A0A1D6MXL5	UDP-D-apiose/UDP-D-xylose synthase 2	542159	UDP-D-apiose/UDP-D-xylose synthase 2 OS=Zea mays OX=4577 GN=542159 PE=4 SV=1 - [A0A1D6MXL5_MAIZE]	37.3432	6.82959	1.03157	0.787042
A0A1D6MD15	Aspartic proteinase A1	100282399	Aspartic proteinase A1 OS=Zea mays OX=4577 GN=100282399 PE=3 SV=1 - [A0A1D6MD15_MAIZE]	54.3222	5.64307	1.0282	0.862731
A0A1D6JQ63	Alanine--glyoxylate aminotransferase 2 homolog 1 mitochondrial	103631778	Alanine--glyoxylate aminotransferase 2 homolog 1 mitochondrial OS=Zea mays OX=4577 GN=103631778 PE=3 SV=1 - [A0A1D6JQ63_MAIZE]	51.9816	8.25049	1.06091	0.761482
B6T0M6	Uncharacterized protein		Uncharacterized protein OS=Zea mays OX=4577 PE=2 SV=1 - [B6T0M6_MAIZE]	5.43396	9.61279	1.46105	0.0899625
A0A1D6KTG9	Serine/threonine protein phosphatase 2A regulatory subunit B''alpha	103643458	Serine/threonine protein phosphatase 2A regulatory subunit B''alpha OS=Zea mays OX=4577 GN=103643458 PE=4 SV=1 - [A0A1D6KTG9_MAIZE]	22.0921	5.09717	0.940593	0.668994
B6SGY5	RNA binding protein	100280485	RNA binding protein OS=Zea mays OX=4577 GN=100280485 PE=2 SV=1 - [B6SGY5_MAIZE]	17.6503	9.27588	1.05796	0.109335
B4FL28	Isovaleryl-CoA dehydrogenase mitochondrial	100217040	Isovaleryl-CoA dehydrogenase mitochondrial OS=Zea mays OX=4577 GN=100217040 PE=2 SV=1 - [B4FL28_MAIZE]	42.5172	7.02002	1.1489	0.0790296
C0P8S9	RNA-binding (RRM/RBD/RNP motifs) family protein	100382538	RNA-binding (RRM/RBD/RNP motifs) family protein OS=Zea mays OX=4577 GN=100382538 PE=2 SV=1 - [C0P8S9_MAIZE]	39.1112	6.25244	0.88958	0.25752
B5AMJ8	Alpha-1,4 glucan phosphorylase	100285259	Alpha-1,4 glucan phosphorylase OS=Zea mays OX=4577 GN=100285259 PE=2 SV=1 - [B5AMJ8_MAIZE]	94.3934	7.28369	0.958199	0.322787
B4FRH7	UDP-N-acetylglucosamine diphosphorylase 2	100282551	UDP-N-acetylglucosamine diphosphorylase 2 OS=Zea mays OX=4577 GN=100282551 PE=2 SV=1 - [B4FRH7_MAIZE]	54.4485	6.29053	0.991122	0.902942
B6UHH3	Eukaryotic translation initiation factor 3 subunit K		Eukaryotic translation initiation factor 3 subunit K OS=Zea mays OX=4577 PE=2 SV=1 - [B6UHH3_MAIZE]	23.4772	5.12256	0.968648	0.723601
B4FU46	Calcium-dependent lipid-binding (CaLB domain) family protein	100273265	Calcium-dependent lipid-binding (CaLB domain) family protein OS=Zea mays OX=4577 GN=100273265 PE=2 SV=1 - [B4FU46_MAIZE]	29.3985	4.86865	1.15124	0.229944
A0A1D6PWC6	Vesicle-associated protein 4-2	100273294	Vesicle-associated protein 4-2 OS=Zea mays OX=4577 GN=100273294 PE=4 SV=1 - [A0A1D6PWC6_MAIZE]	16.0225	5.73193	1.03314	0.659105
B4FQ56	Diaminopimelate epimerase chloroplastic	100273435	Diaminopimelate epimerase chloroplastic OS=Zea mays OX=4577 GN=100273435 PE=2 SV=1 - [B4FQ56_MAIZE]	33.4277	5.65576	0.993197	0.883594
B4FNB4	Actin-related protein 4	ZEAMMB73_Zm00001d027326	Actin-related protein 4 OS=Zea mays OX=4577 GN=ZEAMMB73_Zm00001d027326 PE=2 SV=1 - [B4FNB4_MAIZE]	48.7915	5.23682	0.963566	0.457678
A0A1D6LDQ9	GroES-like zinc-binding alcohol dehydrogenase family protein	100282392	GroES-like zinc-binding alcohol dehydrogenase family protein OS=Zea mays OX=4577 GN=100282392 PE=4 SV=1 - [A0A1D6LDQ9_MAIZE]	42.4557	8.36768	1.4358	0.109286
A0A1D6JXL4	Serine/threonine-protein phosphatase	103634267	Serine/threonine-protein phosphatase OS=Zea mays OX=4577 GN=103634267 PE=3 SV=1 - [A0A1D6JXL4_MAIZE]	36.237	5.2749	1.02532	0.834421
B4FRI1	Phosphoserine aminotransferase	100284817	Phosphoserine aminotransferase OS=Zea mays OX=4577 GN=100284817 PE=2 SV=1 - [B4FRI1_MAIZE]	44.8399	8.30908	1.06096	0.347414
B4FLP7	Cysteine desulfurase mitochondrial	100282194	Cysteine desulfurase mitochondrial OS=Zea mays OX=4577 GN=100282194 PE=2 SV=1 - [B4FLP7_MAIZE]	49.6194	7.09326	0.962641	0.533259
B4FVE1	NADPH:quinone oxidoreductase	ZEAMMB73_Zm00001d047441	NADPH:quinone oxidoreductase OS=Zea mays OX=4577 GN=ZEAMMB73_Zm00001d047441 PE=2 SV=1 - [B4FVE1_MAIZE]	21.9842	7.02002	1.10459	0.312886
A0A1D6DYT2	Signal recognition particle 14 kDa protein	100383868	Signal recognition particle 14 kDa protein OS=Zea mays OX=4577 GN=100383868 PE=4 SV=1 - [A0A1D6DYT2_MAIZE]	8.12226	10.0962	1.00724	0.69316
A0A317YCF7	Putative inactive receptor kinase	RKL1_0	Putative inactive receptor kinase OS=Zea mays OX=4577 GN=RKL1_0 PE=4 SV=1 - [A0A317YCF7_MAIZE]	39.282	6.06201	1.18506	0.0880337
B6UF43	Calcium-dependent protein kinase, isoform 2	100286149	Calcium-dependent protein kinase, isoform 2 OS=Zea mays OX=4577 GN=100286149 PE=2 SV=1 - [B6UF43_MAIZE]	59.9004	6.34131	1.04171	0.0695235
A0A1D6I3N3	Alpha-amylase	100273029	Alpha-amylase OS=Zea mays OX=4577 GN=100273029 PE=3 SV=1 - [A0A1D6I3N3_MAIZE]	47.6224	5.14795	0.863191	0.122178
A0A1D6NL28	Aldehyde dehydrogenase3	541913	Aldehyde dehydrogenase3 OS=Zea mays OX=4577 GN=541913 PE=3 SV=1 - [A0A1D6NL28_MAIZE]	47.8315	6.7417	0.937679	0.127925
C0P567	Pyrophosphate--fructose 6-phosphate 1-phosphotransferase subunit beta	100382182	Pyrophosphate--fructose 6-phosphate 1-phosphotransferase subunit beta OS=Zea mays OX=4577 GN=100382182 PE=2 SV=1 - [C0P567_MAIZE]	61.0129	6.7417	0.940718	0.662101
B4FSU4	SOUL heme-binding family protein	100273098	SOUL heme-binding family protein OS=Zea mays OX=4577 GN=100273098 PE=2 SV=1 - [B4FSU4_MAIZE]	24.8627	9.26123	1.41434	0.0884456
A0A1D6MBB0	Nucleosome assembly protein 1	542588	Nucleosome assembly protein 1 OS=Zea mays OX=4577 GN=542588 PE=3 SV=1 - [A0A1D6MBB0_MAIZE]	36.3362	4.84326	1.07859	0.489951
B4G0R4	Chorismate mutase	103636619	Chorismate mutase OS=Zea mays OX=4577 GN=103636619 PE=2 SV=1 - [B4G0R4_MAIZE]	35.0839	6.88818	1.19197	0.300698
A0A1D6J2U9	Fatty acid amide hydrolase	ZEAMMB73_Zm00001d024936	Fatty acid amide hydrolase OS=Zea mays OX=4577 GN=ZEAMMB73_Zm00001d024936 PE=4 SV=1 - [A0A1D6J2U9_MAIZE]	39.7049	5.89697	1.02138	0.803515
A0A1D6HN92	Diphosphomevalonate decarboxylase	100282878	Diphosphomevalonate decarboxylase OS=Zea mays OX=4577 GN=100282878 PE=3 SV=1 - [A0A1D6HN92_MAIZE]	35.7939	7.09326	1.04726	0.484405
A0A1D6MFD1	V-type proton ATPase subunit E3	100192065	V-type proton ATPase subunit E3 OS=Zea mays OX=4577 GN=100192065 PE=3 SV=1 - [A0A1D6MFD1_MAIZE]	26.014	8.67529	1.08739	0.617612
B4FRD6	Peroxidase	ZEAMMB73_Zm00001d018618	Peroxidase OS=Zea mays OX=4577 GN=ZEAMMB73_Zm00001d018618 PE=2 SV=1 - [B4FRD6_MAIZE]	36.3314	8.11865	0.869371	0.113727
B4FBV8	Eukaryotic translation initiation factor 3 subunit G	100192580	Eukaryotic translation initiation factor 3 subunit G OS=Zea mays OX=4577 GN=100192580 PE=2 SV=1 - [B4FBV8_MAIZE]	31.643	8.51416	0.992391	0.862988
B8A3D0	Uncharacterized protein		Uncharacterized protein OS=Zea mays OX=4577 PE=2 SV=1 - [B8A3D0_MAIZE]	66.4293	4.98291	0.867476	0.195454
C0P6C4	Uncharacterized protein		Uncharacterized protein OS=Zea mays OX=4577 PE=2 SV=1 - [C0P6C4_MAIZE]	18.9067	8.49951	1.03317	0.861867
B6STW7	39S ribosomal protein L47		39S ribosomal protein L47 OS=Zea mays OX=4577 PE=2 SV=1 - [B6STW7_MAIZE]	16.2064	9.92041	0.974942	0.84772
B6TIY2	Isoaspartyl peptidase/L-asparaginase 1	100283503	Isoaspartyl peptidase/L-asparaginase 1 OS=Zea mays OX=4577 GN=100283503 PE=2 SV=1 - [B6TIY2_MAIZE]	34.5373	5.41455	0.956049	0.365133
B6SL90	Arginine/serine-rich splicing factor RSZ21 transcript II	100282961	Arginine/serine-rich splicing factor RSZ21 transcript II OS=Zea mays OX=4577 GN=100282961 PE=2 SV=1 - [B6SL90_MAIZE]	20.9336	11.2388	1.05748	0.11193
B4F9B2	Acetyl-CoA acetyltransferase, cytosolic 1	100282283	Acetyl-CoA acetyltransferase, cytosolic 1 OS=Zea mays OX=4577 GN=100282283 PE=2 SV=1 - [B4F9B2_MAIZE]	41.1623	6.55127	1.07038	0.143866
A0A317Y9Y9	Signal recognition particle protein	SRP9_3	Signal recognition particle protein OS=Zea mays OX=4577 GN=SRP9_3 PE=4 SV=1 - [A0A317Y9Y9_MAIZE]	9.1035	7.28369	0.885469	0.136541
A0A1D6FWI8	Methionine S-methyltransferase	541786	Methionine S-methyltransferase OS=Zea mays OX=4577 GN=541786 PE=3 SV=1 - [A0A1D6FWI8_MAIZE]	122.92	5.8335	1.12626	0.311942
B4FFI2	Nitrilase-associated protein		Nitrilase-associated protein OS=Zea mays OX=4577 PE=2 SV=1 - [B4FFI2_MAIZE]	9.68075	9.5249	1.10242	0.293977
A0A1D6Q8I9	Pyrophosphate--fructose 6-phosphate 1-phosphotransferase subunit alpha	100280449	Pyrophosphate--fructose 6-phosphate 1-phosphotransferase subunit alpha OS=Zea mays OX=4577 GN=100280449 PE=3 SV=1 - [A0A1D6Q8I9_MAIZE]	63.0604	7.06396	0.944864	0.600957
B6UCV5	Shikimate biosynthesis protein aroDE	100285997	Shikimate biosynthesis protein aroDE OS=Zea mays OX=4577 GN=100285997 PE=2 SV=1 - [B6UCV5_MAIZE]	54.7922	5.68115	1.01475	0.821199
C0PBB6	Uncharacterized protein	100276867	Uncharacterized protein OS=Zea mays OX=4577 GN=100276867 PE=2 SV=1 - [C0PBB6_MAIZE]	12.6926	5.93506	1.16081	0.112348
Q9FQC7	Glutathione S-transferase	GSTF8_2	Glutathione S-transferase OS=Zea mays OX=4577 GN=GSTF8_2 PE=2 SV=1 - [Q9FQC7_MAIZE]	25.76	7.56201	0.840627	0.0597156
B4FQB3	Uncharacterized protein		Uncharacterized protein OS=Zea mays OX=4577 PE=2 SV=1 - [B4FQB3_MAIZE]	42.9627	5.92236	0.850674	0.0931927
B4FR03	Nucleic acid-binding OB-fold-like protein	100272828	Nucleic acid-binding OB-fold-like protein OS=Zea mays OX=4577 GN=100272828 PE=2 SV=1 - [B4FR03_MAIZE]	15.5522	9.18799	0.957295	0.49039
B6SHT0	OB-fold nucleic acid binding domain containing protein	100280528	OB-fold nucleic acid binding domain containing protein OS=Zea mays OX=4577 GN=100280528 PE=2 SV=1 - [B6SHT0_MAIZE]	15.4872	8.71924	1.07073	0.573634
B6TRX7	Uncharacterized protein		Uncharacterized protein OS=Zea mays OX=4577 PE=2 SV=1 - [B6TRX7_MAIZE]	16.7035	4.58936	1.06267	0.50476
A0A1D6KL28	Sorbitol dehydrogenase	100283066	Sorbitol dehydrogenase OS=Zea mays OX=4577 GN=100283066 PE=4 SV=1 - [A0A1D6KL28_MAIZE]	19.827	5.46533	1.02767	0.72129
Q6A4M2	3-ketoacyl reductase GL8B	gl8b	3-ketoacyl reductase GL8B OS=Zea mays OX=4577 GN=gl8b PE=2 SV=1 - [Q6A4M2_MAIZE]	35.4051	9.83252	1.00074	0.993233
A0A1D6HQQ8	Peroxidase	ZEAMMB73_Zm00001d018619	Peroxidase OS=Zea mays OX=4577 GN=ZEAMMB73_Zm00001d018619 PE=3 SV=1 - [A0A1D6HQQ8_MAIZE]	54.0498	5.75732	1.01759	0.876154
C0P5V6	Hydroxycinnamoyltransferase10	ZEAMMB73_Zm00001d012274	Hydroxycinnamoyltransferase10 OS=Zea mays OX=4577 GN=ZEAMMB73_Zm00001d012274 PE=2 SV=1 - [C0P5V6_MAIZE]	48.5198	5.35107	1.07792	0.211604
A0A1D6ICV7	Cathepsin B-like cysteine proteinase 3	ZEAMMB73_Zm00001d021615	Cathepsin B-like cysteine proteinase 3 OS=Zea mays OX=4577 GN=ZEAMMB73_Zm00001d021615 PE=3 SV=1 - [A0A1D6ICV7_MAIZE]	38.0884	6.03662	1.06408	0.478177
Q9M585	Stomatin-like protein 2	STM1	Stomatin-like protein 2 OS=Zea mays OX=4577 GN=STM1 PE=2 SV=1 - [Q9M585_MAIZE]	43.2503	6.90283	1.03541	0.216877
A0A1D6KGY0	Thiolase1	101202696	Thiolase1 OS=Zea mays OX=4577 GN=101202696 PE=3 SV=1 - [A0A1D6KGY0_MAIZE]	34.7887	5.40186	1.3916	0.0829532
A0A1D6ESS4	Uridine kinase	100282453	Uridine kinase OS=Zea mays OX=4577 GN=100282453 PE=3 SV=1 - [A0A1D6ESS4_MAIZE]	41.7062	7.38623	1.25723	0.0674751
A0A1D6IQM5	Ubiquitin-activating enzyme E1 2	100381933	Ubiquitin-activating enzyme E1 2 OS=Zea mays OX=4577 GN=100381933 PE=3 SV=1 - [A0A1D6IQM5_MAIZE]	112.804	5.32568	1.09716	0.351837
C4J9M6	Pentatricopeptide repeat-containing protein mitochondrial	100502248	Pentatricopeptide repeat-containing protein mitochondrial OS=Zea mays OX=4577 GN=100502248 PE=2 SV=1 - [C4J9M6_MAIZE]	47.1919	9.29053	0.962542	0.102186
A0A1D6GDG8	LUC7 related protein	100191822	LUC7 related protein OS=Zea mays OX=4577 GN=100191822 PE=4 SV=1 - [A0A1D6GDG8_MAIZE]	29.5201	4.98291	1.04556	0.463963
C4J0P7	Cytochrome c1 1 heme protein mitochondrial	100384742	Cytochrome c1 1 heme protein mitochondrial OS=Zea mays OX=4577 GN=100384742 PE=2 SV=1 - [C4J0P7_MAIZE]	33.2987	6.45557	0.931278	0.18785
A0A1D6JVL7	B-cell receptor-associated 31-like	100191929	B-cell receptor-associated 31-like OS=Zea mays OX=4577 GN=100191929 PE=4 SV=1 - [A0A1D6JVL7_MAIZE]	9.79922	7.07861	0.889389	0.129259
B4G195	Glutamate-oxaloacetate transaminase5	100274472	Glutamate-oxaloacetate transaminase5 OS=Zea mays OX=4577 GN=100274472 PE=2 SV=1 - [B4G195_MAIZE]	49.2764	8.17725	0.978818	0.579112
C0P4W9	Uncharacterized protein		Uncharacterized protein OS=Zea mays OX=4577 PE=2 SV=1 - [C0P4W9_MAIZE]	38.6505	7.82568	1.14985	0.0547483
B4FID4	Aldo-keto reductase family 4 member C9	100194348	Aldo-keto reductase family 4 member C9 OS=Zea mays OX=4577 GN=100194348 PE=2 SV=1 - [B4FID4_MAIZE]	34.3637	5.8208	1.16085	0.419079
B4FIV4	Serine/threonine-protein kinase SRK2C	100216611	Serine/threonine-protein kinase SRK2C OS=Zea mays OX=4577 GN=100216611 PE=2 SV=1 - [B4FIV4_MAIZE]	37.8172	5.64307	0.934596	0.104461
A0A1D6PF61	Translocase of chloroplast	542502	Translocase of chloroplast OS=Zea mays OX=4577 GN=542502 PE=3 SV=1 - [A0A1D6PF61_MAIZE]	34.186	9.17334	0.977615	0.456532
A0A1D6MY05	Glycine-rich RNA-binding protein 3 mitochondrial	100191146	Glycine-rich RNA-binding protein 3 mitochondrial OS=Zea mays OX=4577 GN=100191146 PE=4 SV=1 - [A0A1D6MY05_MAIZE]	21.529	4.95752	1.07141	0.652316
B8A0E6	Uncharacterized protein		Uncharacterized protein OS=Zea mays OX=4577 PE=2 SV=1 - [B8A0E6_MAIZE]	53.5646	7.41553	1.13737	0.282316
A0A1D6F4K3	Hydroxyproline-rich glycoprotein family protein	100272926	Hydroxyproline-rich glycoprotein family protein OS=Zea mays OX=4577 GN=100272926 PE=4 SV=1 - [A0A1D6F4K3_MAIZE]	47.269	7.00537	1.14358	0.240249
K7WGQ3	Multiple organellar RNA editing factor 8 chloroplastic/mitochondrial	100282986	Multiple organellar RNA editing factor 8 chloroplastic/mitochondrial OS=Zea mays OX=4577 GN=100282986 PE=4 SV=1 - [K7WGQ3_MAIZE]	43.9293	9.18799	1.05867	0.175776
A0A317Y5X7	Auxin-induced in root cultures protein 12	AIR12_1	Auxin-induced in root cultures protein 12 OS=Zea mays OX=4577 GN=AIR12_1 PE=4 SV=1 - [A0A317Y5X7_MAIZE]	37.5164	9.74463	0.813765	0.286002
A0A1D6GKL1	Glycosyl hydrolase family 10 protein / carbohydrate-binding domain-containing protein	103625996	Glycosyl hydrolase family 10 protein / carbohydrate-binding domain-containing protein OS=Zea mays OX=4577 GN=103625996 PE=4 SV=1 - [A0A1D6GKL1_MAIZE]	81.957	5.50342	1.01391	0.846023
C4J6E4	Peroxidase	ZEAMMB73_Zm00001d022456	Peroxidase OS=Zea mays OX=4577 GN=ZEAMMB73_Zm00001d022456 PE=2 SV=1 - [C4J6E4_MAIZE]	26.443	5.80811	1.00308	0.955241
B6U1B6	50S ribosomal protein L14		50S ribosomal protein L14 OS=Zea mays OX=4577 PE=2 SV=1 - [B6U1B6_MAIZE]	14.397	10.4771	1.09257	0.531465
B4F9H1	Glycosyltransferase	100191617	Glycosyltransferase OS=Zea mays OX=4577 GN=100191617 PE=2 SV=1 - [B4F9H1_MAIZE]	50.1608	5.33838	1.02107	0.752339
A0A1D6ICZ3	Calcium dependent protein kinase8	542526	Calcium dependent protein kinase8 OS=Zea mays OX=4577 GN=542526 PE=4 SV=1 - [A0A1D6ICZ3_MAIZE]	59.3277	6.25244	1.00513	0.957445
B4FT31	Dehydroascorbate reductase like1	100273125	Dehydroascorbate reductase like1 OS=Zea mays OX=4577 GN=100273125 PE=2 SV=1 - [B4FT31_MAIZE]	23.3411	5.8208	1.27748	0.0817828
B4FAK8	Calnexin homolog2	542421	Calnexin homolog2 OS=Zea mays OX=4577 GN=542421 PE=2 SV=1 - [B4FAK8_MAIZE]	60.2084	4.84326	1.32899	0.0829543
C0P4D6	26S proteasome non-ATPase regulatory subunit 12 homolog B	100382103	26S proteasome non-ATPase regulatory subunit 12 homolog B OS=Zea mays OX=4577 GN=100382103 PE=2 SV=1 - [C0P4D6_MAIZE]	50.5117	7.41553	0.988317	0.798574
B6TD54	ATP-citrate synthase	100282948	ATP-citrate synthase OS=Zea mays OX=4577 GN=100282948 PE=2 SV=1 - [B6TD54_MAIZE]	46.606	5.71924	1.06411	0.241933
B6THR9	3-isopropylmalate dehydrogenase	100283376	3-isopropylmalate dehydrogenase OS=Zea mays OX=4577 GN=100283376 PE=2 SV=1 - [B6THR9_MAIZE]	43.4646	5.5542	0.978122	0.689711
K7TMU1	Basic blue protein	ZEAMMB73_Zm00001d024868	Basic blue protein OS=Zea mays OX=4577 GN=ZEAMMB73_Zm00001d024868 PE=4 SV=1 - [K7TMU1_MAIZE]	11.9039	9.72998	1.1105	0.078079
B6T5U0	F1F0-ATPase inhibitor protein	100276151	F1F0-ATPase inhibitor protein OS=Zea mays OX=4577 GN=100276151 PE=2 SV=1 - [B6T5U0_MAIZE]	12.5246	9.5249	1.41775	0.0537367
A0A1D6HI46	Pyrophosphate--fructose 6-phosphate 1-phosphotransferase subunit alpha	PFP-ALPHA	Pyrophosphate--fructose 6-phosphate 1-phosphotransferase subunit alpha OS=Zea mays OX=4577 GN=PFP-ALPHA PE=3 SV=1 - [A0A1D6HI46_MAIZE]	63.4256	7.35693	1.06094	0.272322
A0A1D6HYS5	Phosphoglucosamine mutase family protein	ZEAMMB73_Zm00001d019568	Phosphoglucosamine mutase family protein OS=Zea mays OX=4577 GN=ZEAMMB73_Zm00001d019568 PE=4 SV=1 - [A0A1D6HYS5_MAIZE]	38.7318	5.69385	0.992977	0.882664
A0A1D6PSV3	SUMO-activating enzyme subunit 1B-2	100284284	SUMO-activating enzyme subunit 1B-2 OS=Zea mays OX=4577 GN=100284284 PE=4 SV=1 - [A0A1D6PSV3_MAIZE]	12.0892	5.2876	0.879237	0.475235
A0A1D6N0K3	Peroxidase	ZEAMMB73_Zm00001d042022	Peroxidase OS=Zea mays OX=4577 GN=ZEAMMB73_Zm00001d042022 PE=3 SV=1 - [A0A1D6N0K3_MAIZE]	38.0656	7.89893	1.36022	0.150202
B6U0D3	Uncharacterized protein		Uncharacterized protein OS=Zea mays OX=4577 PE=2 SV=1 - [B6U0D3_MAIZE]	29.6483	9.18799	1.04862	0.51845
A0A1D6MGB6	Coatomer subunit alpha	ZEAMMB73_Zm00001d039411	Coatomer subunit alpha OS=Zea mays OX=4577 GN=ZEAMMB73_Zm00001d039411 PE=4 SV=1 - [A0A1D6MGB6_MAIZE]	136.388	6.97607	0.966221	0.814105
B4FAY8	Negatively light-regulated protein		Negatively light-regulated protein OS=Zea mays OX=4577 PE=2 SV=1 - [B4FAY8_MAIZE]	15.9039	5.021	1.03997	0.699398
B4FQL1	3-hydroxyisobutyryl-CoA hydrolase-like protein 3 mitochondrial	100272777	3-hydroxyisobutyryl-CoA hydrolase-like protein 3 mitochondrial OS=Zea mays OX=4577 GN=100272777 PE=2 SV=1 - [B4FQL1_MAIZE]	40.6757	5.38916	1.07973	0.186132
A0A060D314	Acyl-CoA N-acyltransferase (NAT) superfamily protein (Fragment)	GNAT27	Acyl-CoA N-acyltransferase (NAT) superfamily protein (Fragment) OS=Zea mays OX=4577 GN=GNAT27 PE=4 SV=1 - [A0A060D314_MAIZE]	21.6182	9.14404	1.11046	0.26673
B4FA76	Dolichyl-diphosphooligosaccharide--protein glycosyltransferase 48 kDa subunit	100191802	Dolichyl-diphosphooligosaccharide--protein glycosyltransferase 48 kDa subunit OS=Zea mays OX=4577 GN=100191802 PE=2 SV=1 - [B4FA76_MAIZE]	48.9389	6.41748	0.905589	0.52091
B6TMJ8	GDP-L-fucose synthase 1	100283867	GDP-L-fucose synthase 1 OS=Zea mays OX=4577 GN=100283867 PE=2 SV=1 - [B6TMJ8_MAIZE]	35.6885	7.37158	1.11731	0.0719479
C0HFI6	DNA helicase	ZEAMMB73_Zm00001d038467	DNA helicase OS=Zea mays OX=4577 GN=ZEAMMB73_Zm00001d038467 PE=2 SV=1 - [C0HFI6_MAIZE]	85.142	6.29053	0.956687	0.437761
C4JC09	Inorganic phosphate transporter 1-2	PTH1-2	Inorganic phosphate transporter 1-2 OS=Zea mays OX=4577 GN=PTH1-2 PE=2 SV=1 - [C4JC09_MAIZE]	57.4135	8.17725	0.973099	0.847444
B6T5W5	Nucleolin	100283837	Nucleolin OS=Zea mays OX=4577 GN=100283837 PE=2 SV=1 - [B6T5W5_MAIZE]	14.9885	9.62744	0.893898	0.316047
C0PAW5	Uncharacterized protein		Uncharacterized protein OS=Zea mays OX=4577 PE=2 SV=1 - [C0PAW5_MAIZE]	64.9319	5.66846	0.890948	0.265873
B6TP06	SnRK1-interacting protein 1		SnRK1-interacting protein 1 OS=Zea mays OX=4577 PE=2 SV=1 - [B6TP06_MAIZE]	20.5004	7.91357	0.965234	0.584291
A0A1D6FSD2	40S ribosomal protein S26	100284808	40S ribosomal protein S26 OS=Zea mays OX=4577 GN=100284808 PE=3 SV=1 - [A0A1D6FSD2_MAIZE]	12.4196	10.6528	1.00929	0.878536
A0A1D6MF50	Eukaryotic translation initiation factor 3 subunit L	103649546	Eukaryotic translation initiation factor 3 subunit L OS=Zea mays OX=4577 GN=103649546 PE=3 SV=1 - [A0A1D6MF50_MAIZE]	55.6451	7.00537	1.00424	0.868791
A0A1D6M4K9	Cytochrome c-2	100383938	Cytochrome c-2 OS=Zea mays OX=4577 GN=100383938 PE=3 SV=1 - [A0A1D6M4K9_MAIZE]	8.98837	8.88037	1.08684	0.490545
A0A317YGC3	Adenylosuccinate synthetase, chloroplastic	PURA	Adenylosuccinate synthetase, chloroplastic OS=Zea mays OX=4577 GN=PURA PE=3 SV=1 - [A0A317YGC3_MAIZE]	51.9467	7.1665	1.06215	0.30277
B6TJX4	SnRK1-interacting protein 1	100283612	SnRK1-interacting protein 1 OS=Zea mays OX=4577 GN=100283612 PE=2 SV=1 - [B6TJX4_MAIZE]	20.0955	7.04932	0.897351	0.0759972
K7VGJ9	AMMECR1 family	100276378	AMMECR1 family OS=Zea mays OX=4577 GN=100276378 PE=4 SV=1 - [K7VGJ9_MAIZE]	19.7819	5.56689	1.04302	0.294904
Q8S4C4	Thioesterase family protein, mRNA	542748	Thioesterase family protein, mRNA OS=Zea mays OX=4577 GN=542748 PE=2 SV=1 - [Q8S4C4_MAIZE]	32.7874	9.49561	0.985648	0.865879
B6TBM1	Alpha-soluble NSF attachment protein 2	100282813	Alpha-soluble NSF attachment protein 2 OS=Zea mays OX=4577 GN=100282813 PE=2 SV=1 - [B6TBM1_MAIZE]	32.3772	5.17334	1.01421	0.704753
A0A1D6EDJ9	Lactoylglutathione lyase	100280481	Lactoylglutathione lyase OS=Zea mays OX=4577 GN=100280481 PE=3 SV=1 - [A0A1D6EDJ9_MAIZE]	17.6657	5.8335	1.00927	0.810285
C0PF40	Uncharacterized protein		Uncharacterized protein OS=Zea mays OX=4577 PE=2 SV=1 - [C0PF40_MAIZE]	28.8988	5.24951	1.34901	0.189214
C0P790	Eukaryotic translation initiation factor 3 subunit B	TIF3B1	Eukaryotic translation initiation factor 3 subunit B OS=Zea mays OX=4577 GN=TIF3B1 PE=2 SV=1 - [C0P790_MAIZE]	82.9476	5.22412	1.0038	0.89575
B6T094	Uncharacterized protein		Uncharacterized protein OS=Zea mays OX=4577 PE=2 SV=1 - [B6T094_MAIZE]	11.3918	5.19873	1.0468	0.535732
A0A096Q886	Eukaryotic translation initiation factor 3 subunit I	103648258	Eukaryotic translation initiation factor 3 subunit I OS=Zea mays OX=4577 GN=103648258 PE=3 SV=1 - [A0A096Q886_MAIZE]	36.2652	6.46826	1.03236	0.651183
B6SSB6	Eukaryotic translation initiation factor 3 subunit I	100281110	Eukaryotic translation initiation factor 3 subunit I OS=Zea mays OX=4577 GN=100281110 PE=2 SV=1 - [B6SSB6_MAIZE]	36.2372	6.46826	1.06294	0.502493
B4FTK9	Alpha/beta-Hydrolases superfamily protein	100282281	Alpha/beta-Hydrolases superfamily protein OS=Zea mays OX=4577 GN=100282281 PE=2 SV=1 - [B4FTK9_MAIZE]	25.7019	5.18604	1.05534	0.895519
B6UAB8	Lipid binding protein		Lipid binding protein OS=Zea mays OX=4577 PE=2 SV=1 - [B6UAB8_MAIZE]	20.5436	8.30908	1.10851	0.291103
A0A1D6K5D2	Nucleoredoxin1	ZEAMMB73_Zm00001d029457	Nucleoredoxin1 OS=Zea mays OX=4577 GN=ZEAMMB73_Zm00001d029457 PE=4 SV=1 - [A0A1D6K5D2_MAIZE]	63.2886	4.86865	0.94036	0.4672
B4FWX5	Dihydroxy-acid dehydratase chloroplastic	100273676	Dihydroxy-acid dehydratase chloroplastic OS=Zea mays OX=4577 GN=100273676 PE=2 SV=1 - [B4FWX5_MAIZE]	63.2271	6.7417	0.861472	0.092112
C0P886	Uncharacterized protein		Uncharacterized protein OS=Zea mays OX=4577 PE=2 SV=1 - [C0P886_MAIZE]	12.3824	9.14404	0.883797	0.217042
A0A1D6NCX2	Phosphotransferase	103651223	Phosphotransferase OS=Zea mays OX=4577 GN=103651223 PE=3 SV=1 - [A0A1D6NCX2_MAIZE]	55.0076	6.34131	1.0513	0.514206
B4FES7	Uncharacterized protein	100193370	Uncharacterized protein OS=Zea mays OX=4577 GN=100193370 PE=2 SV=1 - [B4FES7_MAIZE]	23.9124	9.17334	1.30847	0.346598
B4FVI0	Aspartyl protease AED1	100273432	Aspartyl protease AED1 OS=Zea mays OX=4577 GN=100273432 PE=2 SV=1 - [B4FVI0_MAIZE]	48.7508	6.7124	0.957789	0.23027
A0A1D6EDU7	Acetyl-CoA carboxylase2	542319	Acetyl-CoA carboxylase2 OS=Zea mays OX=4577 GN=542319 PE=4 SV=1 - [A0A1D6EDU7_MAIZE]	226.837	6.04932	0.938308	0.390989
B4F8G5	NADH-cytochrome b5 reductase		NADH-cytochrome b5 reductase OS=Zea mays OX=4577 PE=2 SV=1 - [B4F8G5_MAIZE]	31.1679	8.36768	0.925436	0.328702
A0A1D6FRP5	Cysteine--tRNA ligase 1 cytoplasmic	ZEAMMB73_Zm00001d010530	Cysteine--tRNA ligase 1 cytoplasmic OS=Zea mays OX=4577 GN=ZEAMMB73_Zm00001d010530 PE=4 SV=1 - [A0A1D6FRP5_MAIZE]	46.3433	7.1665	1.09274	0.154298
A0A1D6LGE4	Putative acetylornithine/succinylornithine aminotransferase family protein	ZEAMMB73_Zm00001d035443	Putative acetylornithine/succinylornithine aminotransferase family protein OS=Zea mays OX=4577 GN=ZEAMMB73_Zm00001d035443 PE=3 SV=1 - [A0A1D6LGE4_MAIZE]	52.0429	7.26904	0.996772	0.952238
A0A1D6LAM0	Electron transfer flavoprotein subunit alpha mitochondrial	100191322	Electron transfer flavoprotein subunit alpha mitochondrial OS=Zea mays OX=4577 GN=100191322 PE=4 SV=1 - [A0A1D6LAM0_MAIZE]	21.354	5.66846	1.0415	0.450295
A0A097PKB3	Homoserine kinase (Fragment)		Homoserine kinase (Fragment) OS=Zea mays OX=4577 PE=2 SV=1 - [A0A097PKB3_MAIZE]	31.8689	7.10791	0.9303	0.364869
A0A1D6PZK1	Splicing factor subunit	ZEAMMB73_Zm00001d050056	Splicing factor subunit OS=Zea mays OX=4577 GN=ZEAMMB73_Zm00001d050056 PE=3 SV=1 - [A0A1D6PZK1_MAIZE]	9.23049	6.25244	0.953521	0.864263
A0A1D6QNK7	Nicotianamine aminotransferase1	100193424	Nicotianamine aminotransferase1 OS=Zea mays OX=4577 GN=100193424 PE=4 SV=1 - [A0A1D6QNK7_MAIZE]	23.8883	6.63916	0.89994	0.509857
A0A317YG52	Dolichol-phosphate mannosyltransferase subunit 1	Zm00014a_007328	Dolichol-phosphate mannosyltransferase subunit 1 OS=Zea mays OX=4577 GN=Zm00014a_007328 PE=4 SV=1 - [A0A317YG52_MAIZE]	21.2203	7.59131	0.881314	0.181011
A0A1D6HNF7	Aspartate aminotransferase chloroplastic	ZEAMMB73_Zm00001d018386	Aspartate aminotransferase chloroplastic OS=Zea mays OX=4577 GN=ZEAMMB73_Zm00001d018386 PE=4 SV=1 - [A0A1D6HNF7_MAIZE]	45.4881	6.27783	1.03127	0.732879
C0P558	UBP1-associated protein 2C	100382178	UBP1-associated protein 2C OS=Zea mays OX=4577 GN=100382178 PE=2 SV=1 - [C0P558_MAIZE]	44.7242	8.47021	1.05106	0.765937
C4J0N7	Uncharacterized protein		Uncharacterized protein OS=Zea mays OX=4577 PE=2 SV=1 - [C4J0N7_MAIZE]	52.3285	6.22705	0.942077	0.126363
A0A1D6ERB9	Protein disulfide-isomerase like 2-2	100381521	Protein disulfide-isomerase like 2-2 OS=Zea mays OX=4577 GN=100381521 PE=3 SV=1 - [A0A1D6ERB9_MAIZE]	34.7227	6.41748	1.32577	0.0767855
A0A1D6MYX1	Beta-galactosidase	100274607	Beta-galactosidase OS=Zea mays OX=4577 GN=100274607 PE=3 SV=1 - [A0A1D6MYX1_MAIZE]	101.787	5.51611	0.926591	0.238964
C0HE93	Protein ELC-like	100304271	Protein ELC-like OS=Zea mays OX=4577 GN=100304271 PE=2 SV=1 - [C0HE93_MAIZE]	43.8394	7.1665	1.02236	0.784965
B4FC89	Uncharacterized protein		Uncharacterized protein OS=Zea mays OX=4577 PE=2 SV=1 - [B4FC89_MAIZE]	12.9517	8.51416	1.5623	0.351964
A0A317Y9V4	ALG-2 interacting protein X	Zm00014a_032169	ALG-2 interacting protein X OS=Zea mays OX=4577 GN=Zm00014a_032169 PE=4 SV=1 - [A0A317Y9V4_MAIZE]	95.3304	6.7417	0.986265	0.685857
C0P3W2	Flowering locus K homology domain	ZEAMMB73_Zm00001d030968	Flowering locus K homology domain OS=Zea mays OX=4577 GN=ZEAMMB73_Zm00001d030968 PE=2 SV=1 - [C0P3W2_MAIZE]	54.1697	5.42725	0.950088	0.455765
B6T8U0	Plasminogen activator inhibitor 1 RNA-binding protein	103651256	Plasminogen activator inhibitor 1 RNA-binding protein OS=Zea mays OX=4577 GN=103651256 PE=2 SV=1 - [B6T8U0_MAIZE]	40.4088	6.04932	1.06348	0.214167
B6U0X3	Glycosyltransferase		Glycosyltransferase OS=Zea mays OX=4577 PE=2 SV=1 - [B6U0X3_MAIZE]	51.1782	5.93506	0.935963	0.22459
A0A1D6HGI3	AP-2 complex subunit mu	100283476	AP-2 complex subunit mu OS=Zea mays OX=4577 GN=100283476 PE=3 SV=1 - [A0A1D6HGI3_MAIZE]	48.1789	8.80713	1.01111	0.688532
A0A1D6M6F7	Putative aminotransferase class III superfamily protein	ZEAMMB73_Zm00001d038453	Putative aminotransferase class III superfamily protein OS=Zea mays OX=4577 GN=ZEAMMB73_Zm00001d038453 PE=3 SV=1 - [A0A1D6M6F7_MAIZE]	50.1136	8.03076	1.05863	0.7772
A0A1D6FHT2	Carbohydrate-binding-like fold	100384763	Carbohydrate-binding-like fold OS=Zea mays OX=4577 GN=100384763 PE=4 SV=1 - [A0A1D6FHT2_MAIZE]	117.043	5.88428	1.02602	0.316553
A0A1D6KKK1	MtN19-like protein	100281705	MtN19-like protein OS=Zea mays OX=4577 GN=100281705 PE=4 SV=1 - [A0A1D6KKK1_MAIZE]	44.8913	6.7417	1.01829	0.758165
A0A1D6HN02	T-complex protein 1 subunit alpha	100272316	T-complex protein 1 subunit alpha OS=Zea mays OX=4577 GN=100272316 PE=3 SV=1 - [A0A1D6HN02_MAIZE]	58.1706	6.0874	0.686549	0.0774501
A0A1D6GAZ6	Glycerophosphodiester phosphodiesterase GDPD5	ZEAMMB73_Zm00001d012677	Glycerophosphodiester phosphodiesterase GDPD5 OS=Zea mays OX=4577 GN=ZEAMMB73_Zm00001d012677 PE=4 SV=1 - [A0A1D6GAZ6_MAIZE]	43.5179	5.94775	0.956222	0.471852
B6TBQ1	Hypersensitive-induced response protein		Hypersensitive-induced response protein OS=Zea mays OX=4577 PE=2 SV=1 - [B6TBQ1_MAIZE]	31.5431	6.32861	0.9275	0.393276
B4FN24	Peroxiredoxin-2B	100283392	Peroxiredoxin-2B OS=Zea mays OX=4577 GN=100283392 PE=2 SV=1 - [B4FN24_MAIZE]	17.312	5.021	1.20843	0.0610024
A0A1D6ENT5	Putative leucyl-tRNA synthetase	103647355	Putative leucyl-tRNA synthetase OS=Zea mays OX=4577 GN=103647355 PE=3 SV=1 - [A0A1D6ENT5_MAIZE]	122.981	6.59521	0.976297	0.208099
A0A1D6I3P3	Succinate dehydrogenase subunit 7A mitochondrial	ZEAMMB73_Zm00001d020354	Succinate dehydrogenase subunit 7A mitochondrial OS=Zea mays OX=4577 GN=ZEAMMB73_Zm00001d020354 PE=4 SV=1 - [A0A1D6I3P3_MAIZE]	9.06183	9.90576	1.72439	0.0633079
B4FHJ8	RNA-binding (RRM/RBD/RNP motifs) family protein	100193339	RNA-binding (RRM/RBD/RNP motifs) family protein OS=Zea mays OX=4577 GN=100193339 PE=2 SV=1 - [B4FHJ8_MAIZE]	39.2683	6.41748	1.17686	0.0665205
Q8GT27	Ubiquinol oxidase	aox1	Ubiquinol oxidase OS=Zea mays OX=4577 GN=aox1 PE=2 SV=1 - [Q8GT27_MAIZE]	38.695	8.33838	1.07105	0.781239
B6TN15	NADH-ubiquinone oxidoreductase 24 kDa subunit		NADH-ubiquinone oxidoreductase 24 kDa subunit OS=Zea mays OX=4577 PE=2 SV=1 - [B6TN15_MAIZE]	30.5742	7.91357	0.726612	0.0880367
B6TIF2	Uncharacterized protein		Uncharacterized protein OS=Zea mays OX=4577 PE=2 SV=1 - [B6TIF2_MAIZE]	16.0255	9.5249	1.23792	0.0919737
B4FMF7	Aldose 1-epimerase	100217298	Aldose 1-epimerase OS=Zea mays OX=4577 GN=100217298 PE=2 SV=1 - [B4FMF7_MAIZE]	38.4905	8.80713	1.15642	0.186133
C4JBH6	Uncharacterized protein		Uncharacterized protein OS=Zea mays OX=4577 PE=2 SV=1 - [C4JBH6_MAIZE]	18.2425	8.11865	0.773793	0.0616026
B4FF26	Vacuolar protein sorting-associated protein 26A	100193449	Vacuolar protein sorting-associated protein 26A OS=Zea mays OX=4577 GN=100193449 PE=2 SV=1 - [B4FF26_MAIZE]	35.3903	7.43018	0.866888	0.172216
A0A1D6N5L5	Extradiol ring-cleavage dioxygenase	103650928	Extradiol ring-cleavage dioxygenase OS=Zea mays OX=4577 GN=103650928 PE=4 SV=1 - [A0A1D6N5L5_MAIZE]	35.2607	7.72314	0.972496	0.660326
A0A1D6Q167	Methylcrotonoyl-CoA carboxylase beta chain mitochondrial	100281617	Methylcrotonoyl-CoA carboxylase beta chain mitochondrial OS=Zea mays OX=4577 GN=100281617 PE=4 SV=1 - [A0A1D6Q167_MAIZE]	56.8673	7.63525	1.01616	0.830893
C0PP60	Uncharacterized protein	100384421	Uncharacterized protein OS=Zea mays OX=4577 GN=100384421 PE=2 SV=1 - [C0PP60_MAIZE]	18.8824	7.09326	0.862042	0.255699
A0A0A1PKK5	Cysteine proteinase inhibitor	Cystatin	Cysteine proteinase inhibitor OS=Zea mays OX=4577 GN=Cystatin PE=2 SV=1 - [A0A0A1PKK5_MAIZE]	14.7738	7.40088	1.71477	0.0763499
B6UC41	Glyoxysomal fatty acid beta-oxidation multifunctional protein MFP-a		Glyoxysomal fatty acid beta-oxidation multifunctional protein MFP-a OS=Zea mays OX=4577 PE=2 SV=1 - [B6UC41_MAIZE]	79.0103	8.5874	0.967724	0.466224
K7VUG4	Uncharacterized protein	ZEAMMB73_Zm00001d009969	Uncharacterized protein OS=Zea mays OX=4577 GN=ZEAMMB73_Zm00001d009969 PE=4 SV=1 - [K7VUG4_MAIZE]	19.8015	8.60205	1.02298	0.849271
A0A1D6FH31	DUF4378 domain protein	100283723	DUF4378 domain protein OS=Zea mays OX=4577 GN=100283723 PE=3 SV=1 - [A0A1D6FH31_MAIZE]	52.0531	5.45264	0.934713	0.0976115
B6TVC7	Ferredoxin	100284586	Ferredoxin OS=Zea mays OX=4577 GN=100284586 PE=2 SV=1 - [B6TVC7_MAIZE]	17.8254	7.43018	0.988642	0.884962
A0A1D6MB63	Putative aldehyde dehydrogenase MIS1	100193220	Putative aldehyde dehydrogenase MIS1 OS=Zea mays OX=4577 GN=100193220 PE=4 SV=1 - [A0A1D6MB63_MAIZE]	48.0434	6.68311	1.07729	0.0565885
B4FM12	Uncharacterized protein		Uncharacterized protein OS=Zea mays OX=4577 PE=2 SV=1 - [B4FM12_MAIZE]	39.5217	8.57275	0.813918	0.101503
A0A1D6FE19	Octicosapeptide/Phox/Bem1p family protein	100279440	Octicosapeptide/Phox/Bem1p family protein OS=Zea mays OX=4577 GN=100279440 PE=4 SV=1 - [A0A1D6FE19_MAIZE]	48.64	6.82959	0.886789	0.0731839
A0A1D6GVM5	Delta-aminolevulinic acid dehydratase 1 chloroplastic	ZEAMMB73_Zm00001d014715	Delta-aminolevulinic acid dehydratase 1 chloroplastic OS=Zea mays OX=4577 GN=ZEAMMB73_Zm00001d014715 PE=3 SV=1 - [A0A1D6GVM5_MAIZE]	38.3373	5.75732	1.09008	0.387124
A0A1D6HXK3	CASP-like protein	103632243	CASP-like protein OS=Zea mays OX=4577 GN=103632243 PE=3 SV=1 - [A0A1D6HXK3_MAIZE]	20.6594	10.1401	1.09272	0.342836
B4FUT3	Germin-like protein subfamily 1 member 17	100273345	Germin-like protein subfamily 1 member 17 OS=Zea mays OX=4577 GN=100273345 PE=2 SV=1 - [B4FUT3_MAIZE]	24.5877	6.93213	1.07035	0.279344
A0A1D6GKX8	Threonine--tRNA ligase mitochondrial 1	103626016	Threonine--tRNA ligase mitochondrial 1 OS=Zea mays OX=4577 GN=103626016 PE=3 SV=1 - [A0A1D6GKX8_MAIZE]	84.367	7.09326	1.1438	0.238157
C0PA71	Uncharacterized protein		Uncharacterized protein OS=Zea mays OX=4577 PE=2 SV=1 - [C0PA71_MAIZE]	42.1683	4.53857	0.644948	0.0717171
A0A1D6P7V3	5-hydroxyisourate hydrolase	ZEAMMB73_Zm00001d047217	5-hydroxyisourate hydrolase OS=Zea mays OX=4577 GN=ZEAMMB73_Zm00001d047217 PE=4 SV=1 - [A0A1D6P7V3_MAIZE]	36.1993	6.23975	0.932006	0.630303
B4G1Y5	NAD(P)-binding Rossmann-fold superfamily protein	ZEAMMB73_Zm00001d015956	NAD(P)-binding Rossmann-fold superfamily protein OS=Zea mays OX=4577 GN=ZEAMMB73_Zm00001d015956 PE=2 SV=1 - [B4G1Y5_MAIZE]	36.3518	7.69385	1.04859	0.392239
B6TB41	Methyltransferase		Methyltransferase OS=Zea mays OX=4577 PE=2 SV=1 - [B6TB41_MAIZE]	40.9977	7.59131	1.14995	0.500897
A0A1D6N786	Putative UDP-arabinopyranose mutase 5	ZEAMMB73_Zm00001d042881	Putative UDP-arabinopyranose mutase 5 OS=Zea mays OX=4577 GN=ZEAMMB73_Zm00001d042881 PE=4 SV=1 - [A0A1D6N786_MAIZE]	7.87297	9.11475	0.903163	0.280688
B4FII0	Shikimate O-hydroxycinnamoyltransferase	100194386	Shikimate O-hydroxycinnamoyltransferase OS=Zea mays OX=4577 GN=100194386 PE=2 SV=1 - [B4FII0_MAIZE]	48.5906	6.39209	0.982195	0.782973
A0A1D6N6F5	Omega-hydroxypalmitate O-feruloyl transferase	100273498	Omega-hydroxypalmitate O-feruloyl transferase OS=Zea mays OX=4577 GN=100273498 PE=4 SV=1 - [A0A1D6N6F5_MAIZE]	47.6665	5.88428	0.906595	0.136261
B6T3B4	Succinate dehydrogenase10	100276029	Succinate dehydrogenase10 OS=Zea mays OX=4577 GN=100276029 PE=2 SV=1 - [B6T3B4_MAIZE]	24.1984	7.84033	0.928428	0.387133
B7ZXC5	Thioredoxin		Thioredoxin OS=Zea mays OX=4577 PE=2 SV=1 - [B7ZXC5_MAIZE]	13.6108	7.59131	1.04697	0.591369
A0A1D6MXA3	DNA replication licensing factor MCM7	100273978	DNA replication licensing factor MCM7 OS=Zea mays OX=4577 GN=100273978 PE=3 SV=1 - [A0A1D6MXA3_MAIZE]	80.7635	6.01123	0.932402	0.221713
A0A1D6LLE3	Uncharacterized protein	ZEAMMB73_Zm00001d036255	Uncharacterized protein OS=Zea mays OX=4577 GN=ZEAMMB73_Zm00001d036255 PE=4 SV=1 - [A0A1D6LLE3_MAIZE]	58.2255	8.32373	0.971075	0.4802
B6TBH5	Cortical cell-delineating protein		Cortical cell-delineating protein OS=Zea mays OX=4577 PE=2 SV=1 - [B6TBH5_MAIZE]	13.49	6.82959	0.912789	0.204903
B6T7G0	Glycylpeptide N-tetradecanoyltransferase	100282444	Glycylpeptide N-tetradecanoyltransferase OS=Zea mays OX=4577 GN=100282444 PE=2 SV=1 - [B6T7G0_MAIZE]	49.1692	7.06396	0.918874	0.229858
C0PGQ1	Glycine--tRNA ligase mitochondrial 1	100383520	Glycine--tRNA ligase mitochondrial 1 OS=Zea mays OX=4577 GN=100383520 PE=2 SV=1 - [C0PGQ1_MAIZE]	76.7176	6.40479	0.95671	0.476511
B6SRE7	Peptidyl-prolyl cis-trans isomerase		Peptidyl-prolyl cis-trans isomerase OS=Zea mays OX=4577 PE=2 SV=1 - [B6SRE7_MAIZE]	18.5742	7.75244	0.984758	0.705763
B4FKP0	NDR1/HIN1-like 1	100216955	NDR1/HIN1-like 1 OS=Zea mays OX=4577 GN=100216955 PE=2 SV=1 - [B4FKP0_MAIZE]	24.2634	8.29443	1.00709	0.850549
B6SJB0	60S ribosomal protein L31	100276690	60S ribosomal protein L31 OS=Zea mays OX=4577 GN=100276690 PE=2 SV=1 - [B6SJB0_MAIZE]	13.7775	9.94971	1.08435	0.312792
C0PB57	Uncharacterized protein		Uncharacterized protein OS=Zea mays OX=4577 PE=2 SV=1 - [C0PB57_MAIZE]	7.15106	10.6528	1.36402	0.109534
A0A1D6PT19	Probable bifunctional methylthioribulose-1-phosphate dehydratase/enolase-phosphatase E1	100282341	Probable bifunctional methylthioribulose-1-phosphate dehydratase/enolase-phosphatase E1 OS=Zea mays OX=4577 GN=100282341 PE=3 SV=1 - [A0A1D6PT19_MAIZE]	56.3425	6.48096	1.22776	0.0690536
A0A1D6FGB0	Glutaminyl-tRNA synthetase	100285944	Glutaminyl-tRNA synthetase OS=Zea mays OX=4577 GN=100285944 PE=3 SV=1 - [A0A1D6FGB0_MAIZE]	49.2902	6.56592	1.04781	0.426112
B6T9P7	Methyltransferase		Methyltransferase OS=Zea mays OX=4577 PE=2 SV=1 - [B6T9P7_MAIZE]	38.8263	6.37939	0.990772	0.911926
A0A1D6NI96	SGT1 disease resistance protein homolog1	100282745	SGT1 disease resistance protein homolog1 OS=Zea mays OX=4577 GN=100282745 PE=4 SV=1 - [A0A1D6NI96_MAIZE]	30.5584	5.24951	1.04271	0.804772
B6TCF9	ABC transporter G family member 5	100282890	ABC transporter G family member 5 OS=Zea mays OX=4577 GN=100282890 PE=2 SV=1 - [B6TCF9_MAIZE]	23.781	5.5415	0.863813	0.318233
B6SJJ1	60S ribosomal protein L31	100286120	60S ribosomal protein L31 OS=Zea mays OX=4577 GN=100286120 PE=2 SV=1 - [B6SJJ1_MAIZE]	14.0296	9.84717	0.921383	0.332981
A0A1D6FMD1	Importin subunit alpha	ZEAMMB73_Zm00001d009850	Importin subunit alpha OS=Zea mays OX=4577 GN=ZEAMMB73_Zm00001d009850 PE=4 SV=1 - [A0A1D6FMD1_MAIZE]	35.7775	6.96143	0.915657	0.13587
A0A1D6L5Q5	SecY protein transport family protein	100276798	SecY protein transport family protein OS=Zea mays OX=4577 GN=100276798 PE=3 SV=1 - [A0A1D6L5Q5_MAIZE]	46.7529	9.27588	0.984368	0.787069
A0A0D5BX12	Methionine sulfoxide reductase	MSRA2	Methionine sulfoxide reductase OS=Zea mays OX=4577 GN=MSRA2 PE=2 SV=1 - [A0A0D5BX12_MAIZE]	20.3477	5.35107	1.31977	0.175713
A0A1D6K7M5	Hexose transporter	100285573	Hexose transporter OS=Zea mays OX=4577 GN=100285573 PE=4 SV=1 - [A0A1D6K7M5_MAIZE]	60.4851	5.31299	0.971879	0.516052
B4FST9	Uncharacterized protein		Uncharacterized protein OS=Zea mays OX=4577 PE=2 SV=1 - [B4FST9_MAIZE]	20.593	8.60205	0.998964	0.995122
B8A0S8	Eukaryotic aspartyl protease family protein	100279940	Eukaryotic aspartyl protease family protein OS=Zea mays OX=4577 GN=100279940 PE=2 SV=1 - [B8A0S8_MAIZE]	46.5794	6.41748	1.10858	0.433598
B4FG53	Malate dehydrogenase	100193743	Malate dehydrogenase OS=Zea mays OX=4577 GN=100193743 PE=2 SV=1 - [B4FG53_MAIZE]	41.0878	7.76709	1.03166	0.59758
B6TLM5	Glutathione S-transferase GSTU6		Glutathione S-transferase GSTU6 OS=Zea mays OX=4577 PE=2 SV=1 - [B6TLM5_MAIZE]	25.6364	5.71924	0.804354	0.0888265
A0A317Y3Y6	KH domain-containing protein	Zm00014a_042653	KH domain-containing protein OS=Zea mays OX=4577 GN=Zm00014a_042653 PE=4 SV=1 - [A0A317Y3Y6_MAIZE]	56.0824	6.85889	0.892275	0.0708018
C0P680	Uncharacterized protein	100382297	Uncharacterized protein OS=Zea mays OX=4577 GN=100382297 PE=2 SV=1 - [C0P680_MAIZE]	48.7836	5.07178	0.965381	0.44965
B4FBV7	6,7-dimethyl-8-ribityllumazine synthase	100192579	6,7-dimethyl-8-ribityllumazine synthase OS=Zea mays OX=4577 GN=100192579 PE=2 SV=1 - [B4FBV7_MAIZE]	22.5896	8.26514	0.9712	0.556667
K7V9Q3	NADH dehydrogenase subunit 7	4055893	NADH dehydrogenase subunit 7 OS=Zea mays OX=4577 GN=4055893 PE=3 SV=1 - [K7V9Q3_MAIZE]	35.1414	7.47412	1.00933	0.904845
A0A1D6ETQ1	Cytochrome P450 71A26	103647611	Cytochrome P450 71A26 OS=Zea mays OX=4577 GN=103647611 PE=3 SV=1 - [A0A1D6ETQ1_MAIZE]	55.1372	6.7124	0.916828	0.119549
B6SGM2	Eukaryotic translation initiation factor 4E-2		Eukaryotic translation initiation factor 4E-2 OS=Zea mays OX=4577 PE=2 SV=1 - [B6SGM2_MAIZE]	19.9239	6.39209	1.01964	0.688876
A0A1D6FUH5	Cullin-1	103635893	Cullin-1 OS=Zea mays OX=4577 GN=103635893 PE=3 SV=1 - [A0A1D6FUH5_MAIZE]	37.1243	8.92432	1.06067	0.521686
B4FSZ8	Beta alanine synthase1	100283449	Beta alanine synthase1 OS=Zea mays OX=4577 GN=100283449 PE=2 SV=1 - [B4FSZ8_MAIZE]	45.7388	6.27783	1.12374	0.425437
A0A1D6IHP1	ARM repeat superfamily protein	103633334	ARM repeat superfamily protein OS=Zea mays OX=4577 GN=103633334 PE=4 SV=1 - [A0A1D6IHP1_MAIZE]	123.181	4.95752	1.02918	0.528177
B4FWS6	Putative carboxylesterase 8	100273650	Putative carboxylesterase 8 OS=Zea mays OX=4577 GN=100273650 PE=2 SV=1 - [B4FWS6_MAIZE]	34.5426	5.17334	1.2097	0.184501
B4F8J0	Uncharacterized protein		Uncharacterized protein OS=Zea mays OX=4577 PE=2 SV=1 - [B4F8J0_MAIZE]	21.9302	5.40186	0.854137	0.104924
A0A1D6KPB2	Dihydrolipoamide acetyltransferase component of pyruvate dehydrogenase complex	ZEAMMB73_Zm00001d032224	Dihydrolipoamide acetyltransferase component of pyruvate dehydrogenase complex OS=Zea mays OX=4577 GN=ZEAMMB73_Zm00001d032224 PE=3 SV=1 - [A0A1D6KPB2_MAIZE]	48.8748	8.41162	0.988053	0.91175
C0PAH4	Transducin family protein / WD-40 repeat family protein	100382771	Transducin family protein / WD-40 repeat family protein OS=Zea mays OX=4577 GN=100382771 PE=2 SV=1 - [C0PAH4_MAIZE]	82.3595	5.45264	0.991356	0.600083
K7VDH6	RNA-binding (RRM/RBD/RNP motifs) family protein	100273471	RNA-binding (RRM/RBD/RNP motifs) family protein OS=Zea mays OX=4577 GN=100273471 PE=4 SV=1 - [K7VDH6_MAIZE]	41.5692	4.94482	0.793443	0.122672
C4JAX7	UDP-sulfoquinovose synthase chloroplastic	ZEAMMB73_Zm00001d009967	UDP-sulfoquinovose synthase chloroplastic OS=Zea mays OX=4577 GN=ZEAMMB73_Zm00001d009967 PE=2 SV=1 - [C4JAX7_MAIZE]	52.4194	8.14795	0.838637	0.0685659
A0A0H4PB35	Glycosyltransferase		Glycosyltransferase OS=Zea mays OX=4577 PE=3 SV=1 - [A0A0H4PB35_MAIZE]	52.0528	5.84619	1.01851	0.455965
A0A1D6LZC6	Importin subunit alpha	100273684	Importin subunit alpha OS=Zea mays OX=4577 GN=100273684 PE=4 SV=1 - [A0A1D6LZC6_MAIZE]	36.7129	6.65381	1.04795	0.412962
B4F8B5	Grave disease carrier protein		Grave disease carrier protein OS=Zea mays OX=4577 PE=2 SV=1 - [B4F8B5_MAIZE]	38.5181	9.30518	0.956149	0.478761
B4FAZ6	Adaptin ear-binding coat-associated protein 2	100192009	Adaptin ear-binding coat-associated protein 2 OS=Zea mays OX=4577 GN=100192009 PE=2 SV=1 - [B4FAZ6_MAIZE]	30.4154	7.02002	1.16823	0.253015
B4FEF1	ATPase 100193266	100193266	ATPase 100193266 OS=Zea mays OX=4577 GN=100193266 PE=2 SV=1 - [B4FEF1_MAIZE]	40.6648	4.94482	1.40603	0.0805029
A0A317Y9B4	Uncharacterized protein	Zm00014a_016563	Uncharacterized protein OS=Zea mays OX=4577 GN=Zm00014a_016563 PE=3 SV=1 - [A0A317Y9B4_MAIZE]	25.5089	8.6167	0.682283	0.122063
B6T3D4	Methionyl-tRNA synthetase	100282083	Methionyl-tRNA synthetase OS=Zea mays OX=4577 GN=100282083 PE=2 SV=1 - [B6T3D4_MAIZE]	37.7864	8.04541	1.05754	0.797373
B6T362	Fiber protein Fb34	100286200	Fiber protein Fb34 OS=Zea mays OX=4577 GN=100286200 PE=2 SV=1 - [B6T362_MAIZE]	19.2388	8.1626	0.653796	0.140888
O24566	3-phosphoshikimate 1-carboxyvinyltransferase (Fragment)	epsp-s	3-phosphoshikimate 1-carboxyvinyltransferase (Fragment) OS=Zea mays OX=4577 GN=epsp-s PE=2 SV=1 - [O24566_MAIZE]	47.2524	5.46533	1.21128	0.205318
A0A096RQJ0	DEAD-box ATP-dependent RNA helicase 53	100501766	DEAD-box ATP-dependent RNA helicase 53 OS=Zea mays OX=4577 GN=100501766 PE=4 SV=1 - [A0A096RQJ0_MAIZE]	63.8715	9.45166	1.00593	0.946296
A0A1D6F2U1	Protein transport protein SEC31 homolog B	100279874	Protein transport protein SEC31 homolog B OS=Zea mays OX=4577 GN=100279874 PE=4 SV=1 - [A0A1D6F2U1_MAIZE]	111.119	5.64307	0.846315	0.39596
Q49B46	Inorganic phosphate transporter 1	PHT1-8_1	Inorganic phosphate transporter 1 OS=Zea mays OX=4577 GN=PHT1-8_1 PE=2 SV=1 - [Q49B46_MAIZE]	58.7148	7.75244	0.972022	0.643176
K7UQQ8	Monothiol glutaredoxin-S15 mitochondrial	ZEAMMB73_Zm00001d008736	Monothiol glutaredoxin-S15 mitochondrial OS=Zea mays OX=4577 GN=ZEAMMB73_Zm00001d008736 PE=4 SV=1 - [K7UQQ8_MAIZE]	18.1312	9.0415	1.09383	0.343876
A0A1D6QEU2	Nuclear-pore anchor	100193455	Nuclear-pore anchor OS=Zea mays OX=4577 GN=100193455 PE=4 SV=1 - [A0A1D6QEU2_MAIZE]	130.081	5.31299	1.04374	0.282088
K7VWF2	Outer membrane OMP85 family protein	100274105	Outer membrane OMP85 family protein OS=Zea mays OX=4577 GN=100274105 PE=4 SV=1 - [K7VWF2_MAIZE]	57.208	5.68115	1.0681	0.187101
C0PCZ7	Uncharacterized protein		Uncharacterized protein OS=Zea mays OX=4577 PE=2 SV=1 - [C0PCZ7_MAIZE]	18.6778	6.31592	0.88161	0.186827
B6TD62	Membrane steroid-binding protein 1	100282951	Membrane steroid-binding protein 1 OS=Zea mays OX=4577 GN=100282951 PE=2 SV=1 - [B6TD62_MAIZE]	24.5522	4.61475	1.09549	0.53184
A0A1D6J3W1	Protein transport protein Sec24-like	ZEAMMB73_Zm00001d025010	Protein transport protein Sec24-like OS=Zea mays OX=4577 GN=ZEAMMB73_Zm00001d025010 PE=4 SV=1 - [A0A1D6J3W1_MAIZE]	59.838	6.62451	1.0607	0.361981
A0A1D6G8P2	Ubiquitin carrier protein 7	541984	Ubiquitin carrier protein 7 OS=Zea mays OX=4577 GN=541984 PE=3 SV=1 - [A0A1D6G8P2_MAIZE]	13.3535	5.10986	0.944987	0.553609
B6ST91	CHCH domain containing protein		CHCH domain containing protein OS=Zea mays OX=4577 PE=2 SV=1 - [B6ST91_MAIZE]	7.89505	8.17725	1.04677	0.761849
A1XCI7	Lipoxygenase	LOX12	Lipoxygenase OS=Zea mays OX=4577 GN=LOX12 PE=2 SV=1 - [A1XCI7_MAIZE]	95.9319	8.104	0.961953	0.609023
B4FC49	Uncharacterized protein	100192648	Uncharacterized protein OS=Zea mays OX=4577 GN=100192648 PE=2 SV=1 - [B4FC49_MAIZE]	32.1916	8.01611	0.989236	0.837867
B4G1Z2	Xyloglucan endotransglucosylase/hydrolase	ZEAMMB73_Zm00001d052651	Xyloglucan endotransglucosylase/hydrolase OS=Zea mays OX=4577 GN=ZEAMMB73_Zm00001d052651 PE=2 SV=1 - [B4G1Z2_MAIZE]	34.0805	6.65381	0.8112	0.205836
A0A1D6HIV9	Enhancer of mRNA-decapping protein 4	103627664	Enhancer of mRNA-decapping protein 4 OS=Zea mays OX=4577 GN=103627664 PE=4 SV=1 - [A0A1D6HIV9_MAIZE]	145.923	5.84619	0.937384	0.238603
C0HFI7	Uncharacterized protein		Uncharacterized protein OS=Zea mays OX=4577 PE=2 SV=1 - [C0HFI7_MAIZE]	44.0616	7.48877	0.820159	0.0552529
B4FJB2	Ras-related protein RABA4a	100272235	Ras-related protein RABA4a OS=Zea mays OX=4577 GN=100272235 PE=2 SV=1 - [B4FJB2_MAIZE]	23.9854	7.97217	1.50316	0.350562
A0A1D6EXG7	Villin-4	100383299	Villin-4 OS=Zea mays OX=4577 GN=100383299 PE=4 SV=1 - [A0A1D6EXG7_MAIZE]	101.696	5.98584	0.994874	0.703006
A0A1D6QC13	DNA helicase	100304310	DNA helicase OS=Zea mays OX=4577 GN=100304310 PE=3 SV=1 - [A0A1D6QC13_MAIZE]	79.706	8.20654	0.910615	0.291163
B6SJ51	FIP1		FIP1 OS=Zea mays OX=4577 PE=2 SV=1 - [B6SJ51_MAIZE]	26.3793	7.10791	0.90489	0.421237
A0A1D6I797	Dihydroflavonol-4-reductase	ZEAMMB73_Zm00001d020958	Dihydroflavonol-4-reductase OS=Zea mays OX=4577 GN=ZEAMMB73_Zm00001d020958 PE=4 SV=1 - [A0A1D6I797_MAIZE]	36.8878	5.80811	0.989875	0.695115
A0A1D6PWC2	External alternative NAD(P)H-ubiquinone oxidoreductase B4 mitochondrial	ZEAMMB73_Zm00001d049597	External alternative NAD(P)H-ubiquinone oxidoreductase B4 mitochondrial OS=Zea mays OX=4577 GN=ZEAMMB73_Zm00001d049597 PE=4 SV=1 - [A0A1D6PWC2_MAIZE]	63.6235	7.66455	1.08292	0.0705127
B4FQK5	Eukaryotic peptide chain release factor subunit 1-1	100272775	Eukaryotic peptide chain release factor subunit 1-1 OS=Zea mays OX=4577 GN=100272775 PE=2 SV=1 - [B4FQK5_MAIZE]	49.158	5.51611	0.732634	0.0530433
B4FEC8	Protein transport protein Sec61 subunit beta	ZEAMMB73_Zm00001d011185	Protein transport protein Sec61 subunit beta OS=Zea mays OX=4577 GN=ZEAMMB73_Zm00001d011185 PE=2 SV=1 - [B4FEC8_MAIZE]	8.21222	11.312	1.05319	0.611728
A0A1D6JZM2	Eukaryotic translation initiation factor 2 subunit alpha	100279728	Eukaryotic translation initiation factor 2 subunit alpha OS=Zea mays OX=4577 GN=100279728 PE=4 SV=1 - [A0A1D6JZM2_MAIZE]	37.6624	5.46533	0.925581	0.366817
P00412	Cytochrome c oxidase subunit 2	COX2	Cytochrome c oxidase subunit 2 OS=Zea mays OX=4577 GN=COX2 PE=2 SV=4 - [COX2_MAIZE]	29.6602	4.86865	0.938367	0.11
A0A1D6JJ37	Farnesylcysteine lyase	103642227	Farnesylcysteine lyase OS=Zea mays OX=4577 GN=103642227 PE=4 SV=1 - [A0A1D6JJ37_MAIZE]	58.0779	6.80029	1.08735	0.484159
A0A1D6L5P7	Peroxidase	ZEAMMB73_Zm00001d034128	Peroxidase OS=Zea mays OX=4577 GN=ZEAMMB73_Zm00001d034128 PE=3 SV=1 - [A0A1D6L5P7_MAIZE]	34.9976	7.31299	1.08129	0.538781
A0A1D6JNB6	Glutamate--tRNA ligase cytoplasmic	100383320	Glutamate--tRNA ligase cytoplasmic OS=Zea mays OX=4577 GN=100383320 PE=3 SV=1 - [A0A1D6JNB6_MAIZE]	79.1059	7.94287	0.873693	0.150134
B6TNU0	Eukaryotic translation initiation factor 2 gamma subunit	100383287	Eukaryotic translation initiation factor 2 gamma subunit OS=Zea mays OX=4577 GN=100383287 PE=2 SV=1 - [B6TNU0_MAIZE]	50.7398	8.6167	0.911613	0.546892
A0A1D6IGS0	Elongation initiation factor2	ZEAMMB73_Zm00001d021815	Elongation initiation factor2 OS=Zea mays OX=4577 GN=ZEAMMB73_Zm00001d021815 PE=4 SV=1 - [A0A1D6IGS0_MAIZE]	50.7268	8.73389	1.08231	0.676501
A0A1D6EUJ9	Valine--tRNA ligase mitochondrial 1	100383209	Valine--tRNA ligase mitochondrial 1 OS=Zea mays OX=4577 GN=100383209 PE=3 SV=1 - [A0A1D6EUJ9_MAIZE]	105.575	6.75635	0.978289	0.567865
B8A045	Phospholipase D	100279815	Phospholipase D OS=Zea mays OX=4577 GN=100279815 PE=2 SV=1 - [B8A045_MAIZE]	91.068	7.07861	1.01371	0.714961
B4FBD6	Ribonuclease 1	100192110	Ribonuclease 1 OS=Zea mays OX=4577 GN=100192110 PE=2 SV=1 - [B4FBD6_MAIZE]	25.0161	5.87158	1.22762	0.0893836
B6TGE6	Uncharacterized protein		Uncharacterized protein OS=Zea mays OX=4577 PE=2 SV=1 - [B6TGE6_MAIZE]	33.9022	6.354	0.99434	0.865149
C0PM28	Uncharacterized protein		Uncharacterized protein OS=Zea mays OX=4577 PE=2 SV=1 - [C0PM28_MAIZE]	44.1893	5.43994	0.601955	0.183445
A0A1D6GZ86	3-isopropylmalate dehydratase large subunit	100284902	3-isopropylmalate dehydratase large subunit OS=Zea mays OX=4577 GN=100284902 PE=4 SV=1 - [A0A1D6GZ86_MAIZE]	48.4009	5.38916	1.11954	0.132979
A0A1D6LZQ6	Phosphotransferase	ZEAMMB73_Zm00001d037689	Phosphotransferase OS=Zea mays OX=4577 GN=ZEAMMB73_Zm00001d037689 PE=3 SV=1 - [A0A1D6LZQ6_MAIZE]	30.1137	5.43994	0.989877	0.830208
A0A1D6P3B8	110 kDa U5 small nuclear ribonucleoprotein component CLO	ZEAMMB73_Zm00001d046549	110 kDa U5 small nuclear ribonucleoprotein component CLO OS=Zea mays OX=4577 GN=ZEAMMB73_Zm00001d046549 PE=4 SV=1 - [A0A1D6P3B8_MAIZE]	50.9504	6.12549	1.03741	0.689683
B4FFR3	Outer envelope pore protein 16-3 chloroplastic/mitochondrial	100280772	Outer envelope pore protein 16-3 chloroplastic/mitochondrial OS=Zea mays OX=4577 GN=100280772 PE=2 SV=1 - [B4FFR3_MAIZE]	15.608	9.0708	1.60087	0.241336
B6STN1	IN2-1 protein		IN2-1 protein OS=Zea mays OX=4577 PE=2 SV=1 - [B6STN1_MAIZE]	27.0699	5.2749	1.35906	0.193906
C0PD61	Auxin-responsive family protein	100285927	Auxin-responsive family protein OS=Zea mays OX=4577 GN=100285927 PE=2 SV=1 - [C0PD61_MAIZE]	26.5669	9.17334	0.902137	0.479978
A0A1D6L6F3	Glucose-6-phosphate isomerase	542313	Glucose-6-phosphate isomerase OS=Zea mays OX=4577 GN=542313 PE=3 SV=1 - [A0A1D6L6F3_MAIZE]	48.6329	6.39209	0.934188	0.0733174
A0A1D6MPG6	T-complex protein 1 subunit beta	ZEAMMB73_Zm00001d040257	T-complex protein 1 subunit beta OS=Zea mays OX=4577 GN=ZEAMMB73_Zm00001d040257 PE=3 SV=1 - [A0A1D6MPG6_MAIZE]	55.1837	5.71924	1.05753	0.409075
C0P5A7	Growth-regulating-factor-inteacting factor2	100101545	Growth-regulating-factor-inteacting factor2 OS=Zea mays OX=4577 GN=100101545 PE=2 SV=1 - [C0P5A7_MAIZE]	14.0046	5.04639	1.18659	0.0838665
B6T7C6	Uncharacterized protein		Uncharacterized protein OS=Zea mays OX=4577 PE=2 SV=1 - [B6T7C6_MAIZE]	11.8649	7.85498	1.77009	0.108441
B8A158	Uncharacterized protein		Uncharacterized protein OS=Zea mays OX=4577 PE=2 SV=1 - [B8A158_MAIZE]	52.2754	5.10986	1.10256	0.16253
Q8S4W8	Pyruvate decarboxylase	pdc3	Pyruvate decarboxylase OS=Zea mays OX=4577 GN=pdc3 PE=3 SV=1 - [Q8S4W8_MAIZE]	64.9195	6.0874	0.983378	0.807412
B4FR92	Uncharacterized protein		Uncharacterized protein OS=Zea mays OX=4577 PE=2 SV=1 - [B4FR92_MAIZE]	26.6709	9.87646	0.696709	0.126194
A0A1D6GZE9	RuvB-like helicase	100272912	RuvB-like helicase OS=Zea mays OX=4577 GN=100272912 PE=3 SV=1 - [A0A1D6GZE9_MAIZE]	46.9455	5.56689	0.970198	0.392007
A0A1D6KTV0	Pre-mRNA-processing factor 19 homolog 2	100284255	Pre-mRNA-processing factor 19 homolog 2 OS=Zea mays OX=4577 GN=100284255 PE=4 SV=1 - [A0A1D6KTV0_MAIZE]	55.343	6.32861	1.34912	0.0873223
B4F9P6	Uncharacterized protein		Uncharacterized protein OS=Zea mays OX=4577 PE=2 SV=1 - [B4F9P6_MAIZE]	24.4883	4.80518	1.05854	0.727613
[truncated: 1,231 more rows]
