# Supplementary material for: Quantitative proteomics suggests changes in the carbohydrate metabolism of maize in response to larvae of the belowground herbivore Holotrichia parallela
Source: PeerJ. 2020 Aug 27;8:e9819. doi: 10.7717/peerj.9819 (PMC7456535; doi:10.7717/peerj.9819)
Supplement: Supplemental Information 2 [file peerj-08-9819-s002.xlsx]

## Sheet: Table 1
Table 1. Quantify and analysis of differentially expressed protein
Accession	Protein Name	Gene Name	Description	Coverage	Unique Peptides	Peptides	PSMs	AAs	MW [kDa]	calc. pI	Feed-LN-1/REF	Feed-LN-2/REF	Feed-LN-3/REF	average Feed-LN	CK-LN-1/REF	CK-LN-2/REF	CK-LN-3/REF	average CK-LN	Feed-LN/CK-LN	t test p value
C4J4M8	Histone H2B		Histone H2B OS=Zea mays OX=4577 PE=2 SV=1 - [C4J4M8_MAIZE]	45.64	1	7	34	149	16.0829	10.0229	1.95424	1.55858	1.47436	1.66239	0.521493	0.686633	0.681108	0.629745	2.63979	0.00280102
B4FML8	40S ribosomal protein S13	100272255	40S ribosomal protein S13 OS=Zea mays OX=4577 GN=100272255 PE=2 SV=1 - [B4FML8_MAIZE]	51.66	1	7	41	151	17.1326	10.5356	2.03819	1.54554	1.50068	1.6948	0.599349	0.745242	0.603453	0.649348	2.61	0.00426147
B6TT83	SRC2		SRC2 OS=Zea mays OX=4577 PE=2 SV=1 - [B6TT83_MAIZE]	6.38	1	2	6	329	33.4263	5.21143	1.98045	1.39029	1.48965	1.62013	0.532901	0.884956	0.614514	0.677457	2.39149	0.0111287
B8QUV3	Chitinase	chiA	Chitinase OS=Zea mays subsp. parviglumis OX=76912 GN=chiA PE=4 SV=1 - [B8QUV3_ZEAMP]	16.49	1	5	19	279	29.2017	8.17725	1.8883	1.10056	1.586	1.52496	0.56727	0.803133	0.566598	0.645667	2.36183	0.0222614
B6TTG6	60S ribosomal protein L30		60S ribosomal protein L30 OS=Zea mays OX=4577 PE=2 SV=1 - [B6TTG6_MAIZE]	16.96	1	2	9	112	12.5306	9.65674	1.70647	1.57857		1.64252	0.691632	0.707366		0.699499	2.34814	0.00463604
C0PNI6	Uncharacterized protein		Uncharacterized protein OS=Zea mays OX=4577 PE=2 SV=1 - [C0PNI6_MAIZE]	6.09	1	1	3	115	12.5085	8.63135	1.87503	1.4717	1.41041	1.58572	0.595534	0.791169	0.744436	0.710379	2.23221	0.00509822
B4FIE9	S-adenosylmethionine synthase	100194360	S-adenosylmethionine synthase OS=Zea mays OX=4577 GN=100194360 PE=2 SV=2 - [B4FIE9_MAIZE]	41.37	1	12	79	394	42.7455	5.93506	1.61177	1.55402	1.50077	1.55552	0.793437	0.729148	0.595135	0.705907	2.20357	0.000217919
B4FYQ7	Early nodulin-like protein 16	100274039	Early nodulin-like protein 16 OS=Zea mays OX=4577 GN=100274039 PE=2 SV=1 - [B4FYQ7_MAIZE]	4.62	1	1	2	195	20.6061	7.84033	1.65856	1.50156		1.58006	0.73724	0.708227		0.722734	2.18623	0.00855897
A0A1D6M725	60S ribosomal protein L30-2	100285769	60S ribosomal protein L30-2 OS=Zea mays OX=4577 GN=100285769 PE=4 SV=1 - [A0A1D6M725_MAIZE]	37.5	3	4	11	104	11.6291	9.83252	1.72363	1.34916	1.53489	1.53589	0.671349	0.8077	0.628856	0.702635	2.18591	0.00231722
B4F8K1	60S ribosomal protein L7-2	100191368	60S ribosomal protein L7-2 OS=Zea mays OX=4577 GN=100191368 PE=2 SV=1 - [B4F8K1_MAIZE]	47.54	1	13	63	244	28.4676	10.0815	1.58702		1.4612	1.52411	0.761506		0.655145	0.708325	2.15171	0.010043
B6TNF1	Calnexin homolog1	100283947	Calnexin homolog1 OS=Zea mays OX=4577 GN=100283947 PE=2 SV=1 - [B6TNF1_MAIZE]	15.17	2	8	25	534	60.3635	4.85596	1.65401		1.38628	1.52014	0.697926		0.726396	0.712161	2.13455	0.0266556
B4FMS0	NHP2-like protein 1	103633413	NHP2-like protein 1 OS=Zea mays OX=4577 GN=103633413 PE=2 SV=1 - [B4FMS0_MAIZE]	11.81	2	2	4	127	13.7383	7.12256	1.58181	1.20152	1.62926	1.47087	0.660342	0.871202	0.563374	0.698306	2.10634	0.00904677
B4FAV1	Uncharacterized protein		Uncharacterized protein OS=Zea mays OX=4577 PE=2 SV=1 - [B4FAV1_MAIZE]	5	1	1	11	220	23.0139	6.50732	1.67147	1.19696	1.56262	1.47702	0.675139	0.836717	0.618084	0.70998	2.08037	0.00826352
A0A1D6GY58	Translationally-controlled tumor protein-like protein	103626513	Translationally-controlled tumor protein-like protein OS=Zea mays OX=4577 GN=103626513 PE=3 SV=1 - [A0A1D6GY58_MAIZE]	29.75	1	4	23	121	13.7991	5.33838	1.62621	1.5359		1.58106	0.710783	0.818631		0.764707	2.06753	0.00734113
A0A1D6EXC9	60S ribosomal protein L44	103633242	60S ribosomal protein L44 OS=Zea mays OX=4577 GN=103633242 PE=3 SV=1 - [A0A1D6EXC9_MAIZE]	14.42	2	2	2	104	11.9455	10.1987	1.60064		1.41314	1.50689	0.709467		0.749142	0.729304	2.0662	0.0148499
B6UE22	Translationally-controlled tumor protein		Translationally-controlled tumor protein OS=Zea mays OX=4577 PE=2 SV=1 - [B6UE22_MAIZE]	23.08	1	4	23	156	17.5508	4.80518	1.4554	1.50758		1.48149	0.807446	0.62757		0.717508	2.06477	0.0146946
B8A1R8	5-methyltetrahydropteroyltriglutamate--homocysteine methyltransferase 1	541714	5-methyltetrahydropteroyltriglutamate--homocysteine methyltransferase 1 OS=Zea mays OX=4577 GN=541714 PE=2 SV=1 - [B8A1R8_MAIZE]	33.07	6	22	128	765	84.5654	6.17627	1.71641	1.39343	1.45215	1.52066	0.714529	0.825893	0.669479	0.736634	2.06434	0.00202564
B6TG58	GTP-binding protein SAR1A		GTP-binding protein SAR1A OS=Zea mays OX=4577 PE=2 SV=1 - [B6TG58_MAIZE]	16.58	1	3	15	193	22.0724	7.48877	1.61205	1.40324		1.50765	0.70461	0.771438		0.738024	2.04281	0.0196922
B6SID7	Late embryogenesis abundant protein, group 3	542216	Late embryogenesis abundant protein, group 3 OS=Zea mays OX=4577 GN=542216 PE=2 SV=1 - [B6SID7_MAIZE]	40.11	8	8	18	182	18.5881	8.22119	1.96928	1.24378	1.37328	1.52878	0.612819	0.87595	0.765163	0.751311	2.03482	0.0301173
B4FAB1	Succinate dehydrogenase [ubiquinone] iron-sulfur subunit, mitochondrial		Succinate dehydrogenase [ubiquinone] iron-sulfur subunit, mitochondrial OS=Zea mays OX=4577 PE=2 SV=1 - [B4FAB1_MAIZE]	9.9	3	3	4	202	22.7612	7.73779	1.70339	1.24236	1.47005	1.47193	0.722793	0.81351	0.643618	0.72664	2.02567	0.00628046
B4FGM4	Endothelial differentiation-related factor 1	100193883	Endothelial differentiation-related factor 1 OS=Zea mays OX=4577 GN=100193883 PE=2 SV=1 - [B4FGM4_MAIZE]	38.73	1	8	14	142	15.6384	9.94971	1.65676		1.33873	1.49775	0.745699		0.737357	0.741528	2.01981	0.0415106
B4FNV6	40S ribosomal protein S24		40S ribosomal protein S24 OS=Zea mays OX=4577 PE=2 SV=1 - [B4FNV6_MAIZE]	19.49	1	2	13	118	13.4472	9.99365	1.71883	1.55963	1.25212	1.5102	0.691892	0.753158	0.817183	0.754078	2.00271	0.00593683
B6T2K5	60S ribosomal protein L35	100282013	60S ribosomal protein L35 OS=Zea mays OX=4577 GN=100282013 PE=2 SV=1 - [B6T2K5_MAIZE]	30.08	1	5	20	123	14.3095	11.2974	1.59671	1.63025	1.33951	1.52216	0.739942	0.801966	0.750287	0.764065	1.99218	0.00127444
B4FV12	Non-specific lipid-transfer protein 2	100284199	Non-specific lipid-transfer protein 2 OS=Zea mays OX=4577 GN=100284199 PE=2 SV=1 - [B4FV12_MAIZE]	6.93	1	1	3	101	10.2671	8.42627	1.60374	1.42328	1.47052	1.49918	0.689836	0.878185	0.690143	0.752721	1.99168	0.00083803
A0A1D6ES24	Fasciclin-like arabinogalactan protein 7	103647534	Fasciclin-like arabinogalactan protein 7 OS=Zea mays OX=4577 GN=103647534 PE=4 SV=1 - [A0A1D6ES24_MAIZE]	3.04	1	1	2	263	27.2524	9.20264	1.64765	1.39184		1.51974	0.718045	0.814976		0.766511	1.98268	0.0314289
B4FJK0	Histone H2A	100216750	Histone H2A OS=Zea mays OX=4577 GN=100216750 PE=2 SV=1 - [B4FJK0_MAIZE]	19.38	2	5	34	160	16.6896	10.6821	1.86594	1.3734	1.23451	1.49128	0.613196	0.792694	0.893189	0.76636	1.94593	0.0253626
B4FUU9	Late embryogenesis abundant (LEA) hydroxyproline-rich glycoprotein family	100273348	Late embryogenesis abundant (LEA) hydroxyproline-rich glycoprotein family OS=Zea mays OX=4577 GN=100273348 PE=2 SV=1 - [B4FUU9_MAIZE]	4.08	1	1	2	294	30.2699	10.0815	1.52179	1.39679		1.45929	0.753711	0.750648		0.75218	1.94008	0.00772673
B4FQ03	60S ribosomal protein L7-2		60S ribosomal protein L7-2 OS=Zea mays OX=4577 PE=2 SV=1 - [B4FQ03_MAIZE]	47.54	1	13	64	244	28.3986	10.0962	1.50229	1.38354	1.39705	1.42763	0.717568	0.779492	0.718914	0.738658	1.93273	8.65365e-05
B4FWB5	Uncharacterized protein		Uncharacterized protein OS=Zea mays OX=4577 PE=2 SV=1 - [B4FWB5_MAIZE]	6.47	1	1	3	139	15.478	8.14795	1.72159	1.40433	1.22158	1.44917	0.690716	0.769842	0.809687	0.756748	1.91499	0.00995516
A0A1D6DTX7	Protein DJ-1 homolog D	100280536	Protein DJ-1 homolog D OS=Zea mays OX=4577 GN=100280536 PE=4 SV=1 - [A0A1D6DTX7_MAIZE]	9.37	3	3	5	331	35.1876	5.49072	1.41956	1.40839	1.39232	1.40676	0.826053	0.751379	0.638341	0.738591	1.90465	0.00026595
A0A1D6EKS5	Spermidine synthase 2	ZEAMMB73_Zm00001d005159	Spermidine synthase 2 OS=Zea mays OX=4577 GN=ZEAMMB73_Zm00001d005159 PE=4 SV=1 - [A0A1D6EKS5_MAIZE]	12.12	1	2	6	165	17.923	5.09717	1.49272	1.43753	1.33828	1.42284	0.78828	0.73929	0.727794	0.751788	1.89261	0.000162574
A0A317Y694	5-methyltetrahydropteroyltriglutamate--homocysteine methyltransferase 1	Os12g0623900	5-methyltetrahydropteroyltriglutamate--homocysteine methyltransferase 1 OS=Zea mays OX=4577 GN=Os12g0623900 PE=3 SV=1 - [A0A317Y694_MAIZE]	26.93	2	17	146	765	84.4773	6.20166	1.53131	1.38644	1.4259	1.44788	0.713682	0.805063	0.778204	0.76565	1.89105	0.000181113
B6SN85	H/ACA ribonucleoprotein complex subunit 3-like protein	ZEAMMB73_Zm00001d017242	H/ACA ribonucleoprotein complex subunit 3-like protein OS=Zea mays OX=4577 GN=ZEAMMB73_Zm00001d017242 PE=2 SV=1 - [B6SN85_MAIZE]	25	2	2	4	64	7.55001	9.89111	1.47716	1.44759	1.32479	1.41651	0.776067	0.727591	0.749976	0.751211	1.88564	0.000166396
A0A1D6NLC8	Mitochondrial ATP synthase subunit G protein	100283237	Mitochondrial ATP synthase subunit G protein OS=Zea mays OX=4577 GN=100283237 PE=4 SV=1 - [A0A1D6NLC8_MAIZE]	11.48	1	1	3	61	7.09267	9.59814	1.42564	1.44772	1.41063	1.428	0.780255	0.764541	0.731282	0.758693	1.88218	3.13287e-06
B4G1X9	Uncharacterized protein		Uncharacterized protein OS=Zea mays OX=4577 PE=2 SV=1 - [B4G1X9_MAIZE]	24.4	1	10	25	418	46.7822	5.07178	1.5265	1.4351		1.4808	0.762986	0.81625		0.789618	1.87533	0.00580513
B6TB97	40S ribosomal protein S3	100282772	40S ribosomal protein S3 OS=Zea mays OX=4577 GN=100282772 PE=2 SV=1 - [B6TB97_MAIZE]	51.09	1	11	61	229	25.5416	9.49561		1.45379	1.40397	1.42888		0.809638	0.716334	0.762986	1.87275	0.0062483
B4FC26	Ypt homolog4	100502159	Ypt homolog4 OS=Zea mays OX=4577 GN=100502159 PE=2 SV=1 - [B4FC26_MAIZE]	29.56	2	7	41	203	22.4622	5.70654		1.48772	1.40114	1.44443		0.814371	0.729389	0.77188	1.87132	0.00803736
B4FAE1	Ras-related protein RABD2c	100191848	Ras-related protein RABD2c OS=Zea mays OX=4577 GN=100191848 PE=2 SV=1 - [B4FAE1_MAIZE]	40.89	4	9	47	203	22.4922	5.2749	1.57305	1.36085	1.34293	1.42561	0.730592	0.837496	0.747457	0.771848	1.84701	0.00128055
B4FM96	UMP-CMP kinase	100282335	UMP-CMP kinase OS=Zea mays OX=4577 GN=100282335 PE=2 SV=1 - [B4FM96_MAIZE]	19.81	4	4	7	212	23.4061	5.74463	1.33622	1.38758	1.58261	1.43547	0.818435	0.827428	0.689089	0.778317	1.84433	0.00167093
K7VRI2	Vacuolar proton pump homolog1	ZEAMMB73_Zm00001d045139	Vacuolar proton pump homolog1 OS=Zea mays OX=4577 GN=ZEAMMB73_Zm00001d045139 PE=3 SV=1 - [K7VRI2_MAIZE]	13.52	1	11	48	762	79.5293	5.40186	1.55298	1.2283	1.34079	1.37402	0.732809	0.761751	0.747939	0.747499	1.83815	0.00279831
Q6VWJ0	Caffeoyl-CoA 3-O-methyltransferase 1	ccoaomt1	Caffeoyl-CoA 3-O-methyltransferase 1 OS=Zea mays OX=4577 GN=ccoaomt1 PE=4 SV=1 - [Q6VWJ0_MAIZE]	21.32	1	4	13	258	28.8587	5.30029	1.78384	1.24583	1.56652	1.53206	0.725739	0.969775	0.810555	0.835356	1.83403	0.0154241
A0A1D6EP74	Proton pump-interactor 1	103647378	Proton pump-interactor 1 OS=Zea mays OX=4577 GN=103647378 PE=4 SV=1 - [A0A1D6EP74_MAIZE]	9.05	2	4	8	475	53.2761	9.11475	1.41257	1.42896		1.42076	0.847413	0.709589		0.778501	1.825	0.0114745
K7TT73	40S ribosomal protein S3-1	100274348	40S ribosomal protein S3-1 OS=Zea mays OX=4577 GN=100274348 PE=3 SV=1 - [K7TT73_MAIZE]	57.46	2	12	62	228	25.4326	9.5249		1.36731	1.4022	1.38476		0.799824	0.723024	0.761424	1.81864	0.00454731
B4FRJ7	Fumarylacetoacetate (FAA) hydrolase family	100272625	Fumarylacetoacetate (FAA) hydrolase family OS=Zea mays OX=4577 GN=100272625 PE=2 SV=1 - [B4FRJ7_MAIZE]	13.22	2	3	5	227	24.3798	5.43994	1.50298	1.3423		1.42264	0.771193	0.793859		0.782526	1.81801	0.0156892
B6TDH5	Ubiquitin-conjugating enzyme E2-17 kDa		Ubiquitin-conjugating enzyme E2-17 kDa OS=Zea mays OX=4577 PE=2 SV=1 - [B6TDH5_MAIZE]	10.95	1	2	3	201	21.8208	6.07471		1.43325	1.33017	1.38171		0.779848	0.752457	0.766153	1.80344	0.00742239
B4FWD0	NAD(P)H dehydrogenase (Quinone) FQR1	ZEAMMB73_Zm00001d012607	NAD(P)H dehydrogenase (Quinone) FQR1 OS=Zea mays OX=4577 GN=ZEAMMB73_Zm00001d012607 PE=2 SV=1 - [B4FWD0_MAIZE]	38.92	3	6	21	203	21.5457	6.37939	1.67072	1.20662	1.35412	1.41049	0.794485	0.803235	0.748624	0.782115	1.80343	0.0103778
K7W866	Decoy	ZEAMMB73_Zm00001d045819	Decoy OS=Zea mays OX=4577 GN=ZEAMMB73_Zm00001d045819 PE=4 SV=1 - [K7W866_MAIZE]	6.97	2	2	4	244	27.9914	9.11475	1.49329	1.42026		1.45678	0.813412	0.812568		0.81299	1.79188	0.00320199
A0A1D6INZ0	Rhodanese-like/PpiC domain-containing protein 12 chloroplastic	100216575	Rhodanese-like/PpiC domain-containing protein 12 chloroplastic OS=Zea mays OX=4577 GN=100216575 PE=4 SV=1 - [A0A1D6INZ0_MAIZE]	9.7	1	1	3	165	18.7656	6.68311	1.37663	1.09396	1.2217	1.23076	0.614766	0.834556	0.620176	0.689832	1.78415	0.0077331
B4FM15	60S ribosomal protein L28-1	100281129	60S ribosomal protein L28-1 OS=Zea mays OX=4577 GN=100281129 PE=2 SV=1 - [B4FM15_MAIZE]	45.21	5	6	22	146	16.3288	10.5503	1.52974	1.38402	1.34452	1.41943	0.74817	0.89667	0.758126	0.800989	1.77209	0.0011182
A0A1D6HTN9	Acidic endochitinase	ZEAMMB73_Zm00001d018966	Acidic endochitinase OS=Zea mays OX=4577 GN=ZEAMMB73_Zm00001d018966 PE=4 SV=1 - [A0A1D6HTN9_MAIZE]	6.17	2	2	5	308	33.7268	7.54736	1.17007		1.36286	1.26646	0.739694		0.694388	0.717041	1.76624	0.0309816
A0A1D6DYL0	Polyadenylate-binding protein RBP45C	100382170	Polyadenylate-binding protein RBP45C OS=Zea mays OX=4577 GN=100382170 PE=4 SV=1 - [A0A1D6DYL0_MAIZE]	5.56	2	2	4	180	20.0788	8.39697	1.58279	1.24934	1.36259	1.39824	0.765302	0.885516	0.727681	0.792833	1.7636	0.00511769
B6T2Y1	Peroxiredoxin-5		Peroxiredoxin-5 OS=Zea mays OX=4577 PE=2 SV=1 - [B6T2Y1_MAIZE]	20.17	3	3	9	233	23.8035	7.95752	1.56847	1.30713	1.31581	1.39714	0.720358	0.859526	0.800267	0.793384	1.76099	0.0031067
B6T746	Vesicle-associated membrane protein 722	100282409	Vesicle-associated membrane protein 722 OS=Zea mays OX=4577 GN=100282409 PE=2 SV=1 - [B6T746_MAIZE]	18.92	1	5	9	222	24.874	8.86572	1.40741	1.31764		1.36252	0.753482	0.796412		0.774947	1.75822	0.00709353
C0PK67	Uncharacterized protein		Uncharacterized protein OS=Zea mays OX=4577 PE=2 SV=1 - [C0PK67_MAIZE]	5.83	1	1	6	120	13.793	5.60498	1.57257	1.39013	1.2595	1.4074	0.741416	0.812587	0.855371	0.803124	1.75241	0.00334076
B6SX73	60S ribosomal protein L35-1	100282133	60S ribosomal protein L35-1 OS=Zea mays OX=4577 GN=100282133 PE=2 SV=1 - [B6SX73_MAIZE]	30.08	1	5	22	123	14.2914	11.2827	1.66889	1.37938	1.27026	1.43951	0.734442	0.889372	0.848281	0.824032	1.74691	0.00851162
B4FQL5	T-complex protein 1 subunit epsilon	100282671	T-complex protein 1 subunit epsilon OS=Zea mays OX=4577 GN=100282671 PE=2 SV=1 - [B4FQL5_MAIZE]	26.36	1	14	41	535	59.0336	5.8335	1.52924	1.40169	1.33042	1.42045	0.81848	0.826185	0.800445	0.815037	1.7428	0.000497107
B4FMH4	30S ribosomal protein S17	ZEAMMB73_Zm00001d050054	30S ribosomal protein S17 OS=Zea mays OX=4577 GN=ZEAMMB73_Zm00001d050054 PE=2 SV=1 - [B4FMH4_MAIZE]	21.15	2	2	3	104	11.6381	10.3306	1.41516	1.30188		1.35852	0.774038	0.785934		0.779986	1.74172	0.0095526
B6T1J3	40S ribosomal protein S13		40S ribosomal protein S13 OS=Zea mays OX=4577 PE=2 SV=1 - [B6T1J3_MAIZE]	52.7	1	7	40	148	16.8585	10.4478		1.45642	1.36508	1.41075		0.807109	0.813861	0.810485	1.74063	0.00577101
P29185	Chaperonin CPN60-1, mitochondrial	CPN60I	Chaperonin CPN60-1, mitochondrial OS=Zea mays OX=4577 GN=CPN60I PE=1 SV=2 - [CH61_MAIZE]	31.89	2	17	66	577	61.173	5.84619	1.59351	1.35601	1.23727	1.3956	0.757911	0.838756	0.813686	0.803451	1.73701	0.00528389
C0PDX2	Ribosomal protein		Ribosomal protein OS=Zea mays OX=4577 PE=2 SV=1 - [C0PDX2_MAIZE]	25.58	2	5	16	215	24.4051	9.86182	1.48275	1.34028	1.34622	1.38975	0.812021	0.844478	0.74778	0.801426	1.7341	0.000418263
B6T5F2	60S ribosomal protein L13	100282254	60S ribosomal protein L13 OS=Zea mays OX=4577 GN=100282254 PE=2 SV=1 - [B6T5F2_MAIZE]	25	1	6	42	208	23.8791	10.7114		1.45708	1.32187	1.38948		0.859934	0.744515	0.802225	1.73203	0.0221524
A0A1D6N0J5	Syntaxin-61	100273880	Syntaxin-61 OS=Zea mays OX=4577 GN=100273880 PE=4 SV=1 - [A0A1D6N0J5_MAIZE]	22.22	3	3	5	144	16.6441	5.37646	1.63573	1.23447	1.36771	1.41264	0.781019	0.890414	0.782222	0.817885	1.72718	0.00853461
A0A1D6H1R6	V-type proton ATPase catalytic subunit A	ZEAMMB73_Zm00001d015427	V-type proton ATPase catalytic subunit A OS=Zea mays OX=4577 GN=ZEAMMB73_Zm00001d015427 PE=4 SV=1 - [A0A1D6H1R6_MAIZE]	50.83	2	6	26	120	13.5829	7.28369		1.46588	1.28715	1.37652		0.775441	0.830479	0.80296	1.7143	0.0255635
B4FKG5	Abscisic acid stress ripening1	542304	Abscisic acid stress ripening1 OS=Zea mays OX=4577 GN=542304 PE=2 SV=1 - [B4FKG5_MAIZE]	29.71	4	4	5	138	15.5334	6.354	1.39256		1.32441	1.35849	0.781903		0.804251	0.793077	1.71293	0.00399778
A0A1D6KLH9	Mitochondrial 2-oxoglutarate/malate carrier protein	ZEAMMB73_Zm00001d031833	Mitochondrial 2-oxoglutarate/malate carrier protein OS=Zea mays OX=4577 GN=ZEAMMB73_Zm00001d031833 PE=3 SV=1 - [A0A1D6KLH9_MAIZE]	2.45	1	1	3	326	34.0671	10.3599	1.53374	1.30346	1.26765	1.36828	0.768385	0.851115	0.791735	0.803745	1.70238	0.00289985
A0A1D6P968	Dual specificity phosphatase Cdc25	100277184	Dual specificity phosphatase Cdc25 OS=Zea mays OX=4577 GN=100277184 PE=4 SV=1 - [A0A1D6P968_MAIZE]	9.68	1	1	2	93	10.0561	8.5874	1.46019	1.29359		1.37689	0.835702	0.796267		0.815984	1.6874	0.0225086
B6TMD7	Eukaryotic translation initiation factor 3 subunit J		Eukaryotic translation initiation factor 3 subunit J OS=Zea mays OX=4577 PE=2 SV=1 - [B6TMD7_MAIZE]	10.78	3	3	3	232	26.0081	4.99561	1.25245	1.37366		1.31306	0.882167	0.67614		0.779154	1.68524	0.0466357
C0P4E2	Wall-associated receptor kinase-like 20	100382104	Wall-associated receptor kinase-like 20 OS=Zea mays OX=4577 GN=100382104 PE=2 SV=1 - [C0P4E2_MAIZE]	3.69	2	2	4	651	69.0519	7.53271	1.44506	1.14416	1.28668	1.29196	0.784502	0.700372	0.817788	0.767554	1.68322	0.00499551
B4FAD9	UTP--glucose-1-phosphate uridylyltransferase	100191846	UTP--glucose-1-phosphate uridylyltransferase OS=Zea mays OX=4577 GN=100191846 PE=2 SV=1 - [B4FAD9_MAIZE]	50.95	4	20	106	473	52.1455	5.36377	1.10097	1.57702	1.38012	1.3527	0.898502	0.719929	0.798973	0.805801	1.6787	0.0206731
B6TIF7	Glucan endo-1,3-beta-glucosidase A6	100283442	Glucan endo-1,3-beta-glucosidase A6 OS=Zea mays OX=4577 GN=100283442 PE=2 SV=1 - [B6TIF7_MAIZE]	1.67	1	1	3	479	51.5558	7.66455	1.496	1.32214	1.26027	1.35947	0.757867	0.794074	0.886367	0.812769	1.67264	0.00242812
B6SIV8	Histone H3	103636448	Histone H3 OS=Zea mays OX=4577 GN=103636448 PE=2 SV=1 - [B6SIV8_MAIZE]	16.91	1	3	33	136	15.2745	11.2974	1.6059	1.42164	1.18652	1.40469	0.71569	0.879577	0.925012	0.840093	1.67206	0.0145999
B4FDH0	Uncharacterized protein		Uncharacterized protein OS=Zea mays OX=4577 PE=2 SV=1 - [B4FDH0_MAIZE]	9.94	3	3	5	312	33.8502	7.78174	1.71199	1.18693	1.17887	1.35926	0.694494	0.864314	0.887501	0.815436	1.66692	0.0434687
C0PD84	Aspartyl protease AED1	101027224	Aspartyl protease AED1 OS=Zea mays OX=4577 GN=101027224 PE=2 SV=1 - [C0PD84_MAIZE]	9.46	1	4	14	465	48.0398	8.00146	1.51767	1.357		1.43734	0.825597	0.903673		0.864635	1.66236	0.023469
C0P4T2	Patellin-1	100284590	Patellin-1 OS=Zea mays OX=4577 GN=100284590 PE=2 SV=1 - [C0P4T2_MAIZE]	16.29	6	9	24	571	62.2529	4.69092	1.75011	1.21422	1.22595	1.39676	0.88251	0.838318	0.80508	0.841969	1.65892	0.0357119
A0A1D6MDL2	40S ribosomal protein S12	100281932	40S ribosomal protein S12 OS=Zea mays OX=4577 GN=100281932 PE=3 SV=1 - [A0A1D6MDL2_MAIZE]	21.67	1	2	8	120	12.9546	6.65381	1.40367	1.34598	1.29134	1.347	0.82566	0.813351	0.803268	0.814093	1.6546	8.67739e-05
B4FGC8	40S ribosomal protein S12	100193804	40S ribosomal protein S12 OS=Zea mays OX=4577 GN=100193804 PE=2 SV=1 - [B4FGC8_MAIZE]	30.71	2	3	7	140	14.9706	5.51611	1.54878	1.24182	1.26684	1.35248	0.778708	0.865958	0.817715	0.820794	1.64777	0.00636948
B8QWH5	Pathogenesis-related protein class I (Fragment)	pr1	Pathogenesis-related protein class I (Fragment) OS=Zea mays subsp. parviglumis OX=76912 GN=pr1 PE=3 SV=1 - [B8QWH5_ZEAMP]	21.66	2	2	6	157	16.5736	4.62744	1.46534	1.10633	1.31747	1.29638	0.757692	0.743237	0.859415	0.786781	1.6477	0.00991101
B8A1E3	Uncharacterized protein		Uncharacterized protein OS=Zea mays OX=4577 PE=2 SV=1 - [B8A1E3_MAIZE]	7.45	3	3	4	349	37.4873	5.69385	1.31955	1.27736		1.29845	0.848896	0.729788		0.789342	1.64498	0.0150532
B6SYZ9	Acyl carrier protein		Acyl carrier protein OS=Zea mays OX=4577 PE=2 SV=1 - [B6SYZ9_MAIZE]	6.77	1	1	4	133	14.4866	5.70654	1.53734	1.29312	1.21267	1.34771	0.734027	0.88051	0.848934	0.821157	1.64124	0.00799787
B6TI78	Peptidylprolyl isomerase		Peptidylprolyl isomerase OS=Zea mays OX=4577 PE=2 SV=1 - [B6TI78_MAIZE]	15.01	7	9	21	553	61.6528	5.2876	1.45646	1.37734	1.16171	1.33184	0.775612	0.78121	0.882311	0.813044	1.63809	0.00539533
B6TT37	Blue copper protein	UCC1_2	Blue copper protein OS=Zea mays OX=4577 GN=UCC1_2 PE=2 SV=1 - [B6TT37_MAIZE]	6.25	1	1	4	176	17.4144	5.70654	1.62556	1.10067	1.21178	1.31267	0.678514	0.961192	0.770236	0.803314	1.63407	0.0474335
C0HHC1	GTP-binding nuclear protein		GTP-binding nuclear protein OS=Zea mays OX=4577 PE=2 SV=1 - [C0HHC1_MAIZE]	23.12	4	4	13	173	19.8422	9.23193	1.53763	1.30153	1.16357	1.33425	0.790301	0.821436	0.840888	0.817542	1.63202	0.00938698
A0A1D6FWU2	Histone deacetylase102	ZEAMMB73_Zm00001d011139	Histone deacetylase102 OS=Zea mays OX=4577 GN=ZEAMMB73_Zm00001d011139 PE=4 SV=1 - [A0A1D6FWU2_MAIZE]	9.23	2	3	8	271	28.8809	5.10986	1.42317	1.38038	1.20328	1.33561	0.762752	0.811772	0.890603	0.821709	1.62541	0.00260982
K7UFY8	Polyadenylate-binding protein RBP47B	103653663	Polyadenylate-binding protein RBP47B OS=Zea mays OX=4577 GN=103653663 PE=4 SV=1 - [K7UFY8_MAIZE]	3.49	1	1	2	430	46.5787	8.55811	1.4673	1.29439		1.38085	0.855792	0.845593		0.850693	1.6232	0.0256643
B4FCB9	Peroxisomal membrane protein 11C	100192700	Peroxisomal membrane protein 11C OS=Zea mays OX=4577 GN=100192700 PE=2 SV=1 - [B4FCB9_MAIZE]	2.98	1	1	2	235	26.0392	9.77393	1.41215		1.24839	1.33027	0.782586		0.857079	0.819832	1.62261	0.0296789
A0A1R3N4Y1	Aquaporin PIP2-5	ZEAMMB73_Zm00001d003006	Aquaporin PIP2-5 OS=Zea mays OX=4577 GN=ZEAMMB73_Zm00001d003006 PE=3 SV=1 - [A0A1R3N4Y1_MAIZE]	25.61	6	6	15	285	29.8165	7.85498	1.60516	1.2076	1.14727	1.32001	0.733381	0.816793	0.895146	0.815107	1.61943	0.0287585
B4G1E6	Uncharacterized protein		Uncharacterized protein OS=Zea mays OX=4577 PE=2 SV=1 - [B4G1E6_MAIZE]	21.28	5	5	8	329	35.8769	5.09717	1.46799	1.22031	1.3812	1.3565	0.839123	0.92605	0.749241	0.838138	1.61847	0.00427738
A0A1D6LVG0	Blue copper protein	100283202	Blue copper protein OS=Zea mays OX=4577 GN=100283202 PE=4 SV=1 - [A0A1D6LVG0_MAIZE]	3.29	1	1	3	213	20.4681	6.90283	1.41526	1.31519	1.25969	1.33004	0.803334	0.883827	0.786963	0.824708	1.61275	0.00075141
A0A1D6QG35	Ubiquitin-activating enzyme E1 2	100279472	Ubiquitin-activating enzyme E1 2 OS=Zea mays OX=4577 GN=100279472 PE=3 SV=1 - [A0A1D6QG35_MAIZE]	15.57	3	13	29	1015	112.775	5.2876	1.38246	1.19902		1.29074	0.79918	0.805044		0.802112	1.60918	0.0335056
B4FX40	Cysteine proteinase 1	ZEAMMB73_Zm00001d016446	Cysteine proteinase 1 OS=Zea mays OX=4577 GN=ZEAMMB73_Zm00001d016446 PE=2 SV=1 - [B4FX40_MAIZE]	4.58	2	2	9	371	40.2778	6.46826	1.53461	1.21102	1.22528	1.32364	0.763915	0.961022	0.747049	0.823995	1.60637	0.016578
C0PA18	Branched-chain-amino-acid aminotransferase		Branched-chain-amino-acid aminotransferase OS=Zea mays OX=4577 PE=2 SV=1 - [C0PA18_MAIZE]	12.2	4	4	10	328	35.3603	8.67529	1.49159	1.31913	1.27866	1.36313	0.804063	0.865663	0.87771	0.849145	1.6053	0.00174955
B4FET7	Putative mitochondrial import inner membrane translocase subunit TIM21	100193378	Putative mitochondrial import inner membrane translocase subunit TIM21 OS=Zea mays OX=4577 GN=100193378 PE=2 SV=1 - [B4FET7_MAIZE]	11.41	3	3	6	263	29.1251	9.39307	1.53056	1.194	1.341	1.35518	0.749474	0.929904	0.859233	0.846204	1.60149	0.0100338
A0A1D6ELG3	Polyadenylate-binding protein	ZEAMMB73_Zm00001d005276	Polyadenylate-binding protein OS=Zea mays OX=4577 GN=ZEAMMB73_Zm00001d005276 PE=3 SV=1 - [A0A1D6ELG3_MAIZE]	22.16	5	10	31	546	60.1258	8.04541	1.47845	1.36831	1.21531	1.35402	0.79867	0.857163	0.892089	0.849307	1.59427	0.00338174
A0A1D6Q1A8	THO complex subunit 4C	100280157	THO complex subunit 4C OS=Zea mays OX=4577 GN=100280157 PE=4 SV=1 - [A0A1D6Q1A8_MAIZE]	13.77	2	2	3	138	15.2627	8.99756	1.37098	1.33771	1.17271	1.2938	0.831698	0.77024	0.832793	0.811577	1.59418	0.00173045
A0A1D6QS59	Succinate-semialdehyde dehydrogenase mitochondrial	ZEAMMB73_Zm00001d053776	Succinate-semialdehyde dehydrogenase mitochondrial OS=Zea mays OX=4577 GN=ZEAMMB73_Zm00001d053776 PE=3 SV=1 - [A0A1D6QS59_MAIZE]	12.42	2	2	5	153	16.6298	9.61279	1.29501	1.45612	1.13833	1.29648	0.842911	0.756802	0.842575	0.814096	1.59255	0.00738988
A0A1D6KTT8	60S ribosomal protein L21-1	ZEAMMB73_Zm00001d032760	60S ribosomal protein L21-1 OS=Zea mays OX=4577 GN=ZEAMMB73_Zm00001d032760 PE=4 SV=1 - [A0A1D6KTT8_MAIZE]	29.88	2	7	29	164	18.7522	10.521	1.40728	1.33998	1.26521	1.33749	0.814823	0.84972	0.857925	0.840823	1.59069	0.000323995
B4FQ57	Histone H2A	ZEAMMB73_Zm00001d021707	Histone H2A OS=Zea mays OX=4577 GN=ZEAMMB73_Zm00001d021707 PE=2 SV=1 - [B4FQ57_MAIZE]	22.96	2	4	37	135	13.9406	10.228	1.5713	1.24812	1.18832	1.33591	0.658919	0.930522	0.930696	0.840046	1.59028	0.0294686
C0PGF7	Pectin acetylesterase		Pectin acetylesterase OS=Zea mays OX=4577 PE=2 SV=1 - [C0PGF7_MAIZE]	2.09	1	1	2	382	40.182	8.38232	1.37521	1.34168		1.35844	0.833398	0.87812		0.855759	1.58741	0.00307662
A0A1D6LHK0	Protein transport protein Sec61 subunit beta	ZEAMMB73_Zm00001d035610	Protein transport protein Sec61 subunit beta OS=Zea mays OX=4577 GN=ZEAMMB73_Zm00001d035610 PE=3 SV=1 - [A0A1D6LHK0_MAIZE]	37.04	1	3	31	108	10.6664	11.9272	1.21047	1.08153	0.917006	1.06967	0.605074	0.652461	0.768873	0.675469	1.58359	0.0157669
B4FAJ3	Senescence enhanced2b	542609	Senescence enhanced2b OS=Zea mays OX=4577 GN=542609 PE=2 SV=1 - [B4FAJ3_MAIZE]	2.91	2	2	2	481	52.944	5.78271	1.33705		1.32628	1.33166	0.864047		0.818318	0.841183	1.58309	0.00228562
C0P2L6	Uncharacterized protein		Uncharacterized protein OS=Zea mays OX=4577 PE=2 SV=1 - [C0P2L6_MAIZE]	36.36	4	4	13	99	10.8851	9.40771	1.5152	1.29994	1.23293	1.34936	0.839636	0.859034	0.865078	0.854583	1.57897	0.00443015
B6U3T7	Aquaporin TIP2.1		Aquaporin TIP2.1 OS=Zea mays OX=4577 PE=2 SV=1 - [B6U3T7_MAIZE]	6.45	2	2	6	248	25.1322	6.66846	1.43549	1.3287	1.09507	1.28642	0.815537	0.719825	0.912799	0.816054	1.57639	0.01494
A0A1D6P3H2	Protein kinase superfamily protein with octicosapeptide/Phox/Bem1p domain	ZEAMMB73_Zm00001d046569	Protein kinase superfamily protein with octicosapeptide/Phox/Bem1p domain OS=Zea mays OX=4577 GN=ZEAMMB73_Zm00001d046569 PE=4 SV=1 - [A0A1D6P3H2_MAIZE]	4.24	1	1	2	165	18.4023	5.52881	1.31468	1.35949		1.33709	0.835743	0.86105		0.848396	1.57601	0.00276024
B6TSH6	60S ribosomal protein L21		60S ribosomal protein L21 OS=Zea mays OX=4577 PE=2 SV=1 - [B6TSH6_MAIZE]	30.49	2	7	25	164	18.7952	10.4038	1.4422	1.33868	1.19405	1.32498	0.788289	0.861733	0.890033	0.846685	1.5649	0.00359948
B6SHW0	60S ribosomal protein L6	103653691	60S ribosomal protein L6 OS=Zea mays OX=4577 GN=103653691 PE=2 SV=1 - [B6SHW0_MAIZE]	29.68	3	8	37	219	24.2734	10.1401	1.54449	1.43291	1.06824	1.34854	0.782381	0.825493	0.985992	0.864622	1.55969	0.0365547
A0A096T2N3	Phospholipase D	100280265	Phospholipase D OS=Zea mays OX=4577 GN=100280265 PE=3 SV=1 - [A0A096T2N3_MAIZE]	4.67	3	4	6	857	95.254	6.58057	1.32844	1.21984		1.27414	0.853334	0.78847		0.820902	1.55212	0.0189216
B6T692	Surfactant protein B containing protein		Surfactant protein B containing protein OS=Zea mays OX=4577 PE=2 SV=1 - [B6T692_MAIZE]	7.23	2	2	3	235	25.892	5.8335	1.1641		1.34968	1.25689	0.768417		0.851928	0.810172	1.55138	0.048166
A0A1D6I675	Coatomer subunit zeta-2	541628	Coatomer subunit zeta-2 OS=Zea mays OX=4577 GN=541628 PE=4 SV=1 - [A0A1D6I675_MAIZE]	10.75	1	1	3	93	10.8076	9.5542	1.58753	1.09912	1.28485	1.32383	0.769975	0.973396	0.831484	0.858285	1.54242	0.0394642
A0A1D6PL20	Hydroxymethylglutaryl-CoA synthase	100285783	Hydroxymethylglutaryl-CoA synthase OS=Zea mays OX=4577 GN=100285783 PE=4 SV=1 - [A0A1D6PL20_MAIZE]	12.55	3	3	9	247	27.962	8.646	1.08979	1.32585	1.40545	1.2737	0.906655	0.844672	0.735695	0.829007	1.53641	0.0142572
B6SQI9	Uclacyanin-2		Uclacyanin-2 OS=Zea mays OX=4577 PE=2 SV=1 - [B6SQI9_MAIZE]	21.08	4	4	12	204	20.2331	8.83643	1.39449	1.28388	1.22557	1.30131	0.815596	0.870008	0.858221	0.847942	1.53467	0.000968901
B6TPJ3	Uncharacterized protein		Uncharacterized protein OS=Zea mays OX=4577 PE=2 SV=1 - [B6TPJ3_MAIZE]	11.99	3	3	9	267	26.7927	6.20166	1.31221	1.20361	1.3519	1.28924	0.85532	0.96626	0.700391	0.840657	1.53361	0.00726083
E5G401	ADP-glucose pyrophosphorylase embryo small subunit (Fragment)	Agp2	ADP-glucose pyrophosphorylase embryo small subunit (Fragment) OS=Zea mays subsp. mays OX=381124 GN=Agp2 PE=4 SV=1 - [E5G401_MAIZE]	3.07	1	1	2	293	32.9344	4.95752	1.31362	1.27607		1.29484	0.847714	0.841598		0.844656	1.53298	0.00178095
A0A1D6NLZ8	Cytochrome c oxidase polypeptide Vb	103651601	Cytochrome c oxidase polypeptide Vb OS=Zea mays OX=4577 GN=103651601 PE=4 SV=1 - [A0A1D6NLZ8_MAIZE]	19.23	2	2	2	104	11.6785	4.60205	1.30314	1.30242		1.30278	0.863509	0.839228		0.851369	1.53022	0.000723161
C0PHV6	Uncharacterized protein		Uncharacterized protein OS=Zea mays OX=4577 PE=2 SV=1 - [C0PHV6_MAIZE]	27.62	2	15	62	583	63.0018	5.70654	1.49804	1.27792	1.13829	1.30475	0.814239	0.806554	0.942526	0.85444	1.52703	0.0166317
C0PK05	Lactoylglutathione lyase		Lactoylglutathione lyase OS=Zea mays OX=4577 PE=2 SV=1 - [C0PK05_MAIZE]	30	8	8	27	290	32.3244	6.18896	1.4464	1.37055	1.11669	1.31121	0.800099	0.833405	0.943044	0.858849	1.52671	0.0141035
B4G1P1	Glutamine synthetase	542214	Glutamine synthetase OS=Zea mays OX=4577 GN=542214 PE=2 SV=1 - [B4G1P1_MAIZE]	39.33	8	11	64	356	39.2704	5.47803	1.47024	1.17711	1.22928	1.29221	0.80803	0.879986	0.851684	0.846567	1.52641	0.00859339
B6T1H0	40S ribosomal protein S6	542529	40S ribosomal protein S6 OS=Zea mays OX=4577 GN=542529 PE=2 SV=1 - [B6T1H0_MAIZE]	18.73	6	6	17	251	28.6277	10.7114	1.33841	1.41267	1.14575	1.29894	0.817188	0.848381	0.896587	0.854052	1.52092	0.00580219
B4FHE4	60S ribosomal protein L17-2	100194089	60S ribosomal protein L17-2 OS=Zea mays OX=4577 GN=100194089 PE=2 SV=1 - [B4FHE4_MAIZE]	25.15	3	5	12	171	19.3803	10.1401	1.36883	1.2755	1.20341	1.28258	0.844839	0.847228	0.851065	0.847711	1.51299	0.000817339
B6SND3	Acyl carrier protein	ZEAMMB73_Zm00001d038057	Acyl carrier protein OS=Zea mays OX=4577 GN=ZEAMMB73_Zm00001d038057 PE=2 SV=1 - [B6SND3_MAIZE]	17.32	2	2	3	127	13.6211	5.80811		1.29694	1.2768	1.28687		0.890062	0.820713	0.855388	1.50443	0.00693027
B4FQ26	IAA-amino acid hydrolase ILR1	100272708	IAA-amino acid hydrolase ILR1 OS=Zea mays OX=4577 GN=100272708 PE=2 SV=1 - [B4FQ26_MAIZE]	4.9	2	2	4	408	43.4361	6.52197	1.39787	1.32238	1.0773	1.26585	0.771803	0.848933	0.90736	0.842699	1.50214	0.0154448
B4FI53	60S ribosomal protein L32	100194289	60S ribosomal protein L32 OS=Zea mays OX=4577 GN=100194289 PE=2 SV=1 - [B4FI53_MAIZE]	36.09	3	4	11	133	15.7066	10.4185	1.47207	1.33146	1.09929	1.30094	0.826954	0.878854	0.896529	0.867446	1.49974	0.0172954
C0PN62	Uncharacterized protein		Uncharacterized protein OS=Zea mays OX=4577 PE=2 SV=1 - [C0PN62_MAIZE]	1.88	1	1	2	373	39.7914	6.53662		1.30581	1.21343	1.25962		0.831713	0.857048	0.84438	1.49177	0.0130444
B6TBW2	ATP synthase delta chain	100282837	ATP synthase delta chain OS=Zea mays OX=4577 GN=100282837 PE=2 SV=1 - [B6TBW2_MAIZE]	30.47	8	8	22	233	25.5498	9.37842	1.51564	1.2371	1.10437	1.28571	0.767121	0.89193	0.931742	0.863598	1.48878	0.0321659
A0A0B4J3C2	Elongation factor 1-alpha	ZEAMMB73_Zm00001d037873	Elongation factor 1-alpha OS=Zea mays OX=4577 GN=ZEAMMB73_Zm00001d037873 PE=3 SV=1 - [A0A0B4J3C2_MAIZE]	19.69	2	10	123	447	49.1357	9.12939	1.19319	1.18498	1.44318	1.27378	0.967965	0.92299	0.678227	0.856394	1.48738	0.0278843
K7UH13	Adenosine kinase 2	ZEAMMB73_Zm00001d051157	Adenosine kinase 2 OS=Zea mays OX=4577 GN=ZEAMMB73_Zm00001d051157 PE=4 SV=1 - [K7UH13_MAIZE]	22.51	2	6	14	342	36.9796	5.08447	1.23606	1.31726	1.17154	1.24162	0.899738	0.724982	0.882987	0.835903	1.48537	0.00436735
A0A1D6IMZ9	Peroxidase	ZEAMMB73_Zm00001d022457	Peroxidase OS=Zea mays OX=4577 GN=ZEAMMB73_Zm00001d022457 PE=3 SV=1 - [A0A1D6IMZ9_MAIZE]	15.94	4	4	7	320	33.1913	6.65381	1.52069	1.23717	1.1742	1.31069	0.713562	0.960905	0.976758	0.883741	1.48311	0.0352166
A0A1D6NSA5	NAD(P)H dehydrogenase C1	ZEAMMB73_Zm00001d044920	NAD(P)H dehydrogenase C1 OS=Zea mays OX=4577 GN=ZEAMMB73_Zm00001d044920 PE=4 SV=1 - [A0A1D6NSA5_MAIZE]	22.87	2	4	17	293	30.9922	11.3706	1.29273	1.38313	1.13208	1.26931	0.837021	0.828173	0.903867	0.856354	1.48223	0.005889
C4J0F8	Uncharacterized protein		Uncharacterized protein OS=Zea mays OX=4577 PE=2 SV=1 - [C4J0F8_MAIZE]	37.61	3	4	20	117	12.9901	10.6675	1.43783	1.21676	1.21697	1.29052	0.855912	0.929651	0.826647	0.870737	1.4821	0.00624521
A0A1D6MY10	60S ribosomal protein L6	ZEAMMB73_Zm00001d041756	60S ribosomal protein L6 OS=Zea mays OX=4577 GN=ZEAMMB73_Zm00001d041756 PE=3 SV=1 - [A0A1D6MY10_MAIZE]	9	1	5	19	422	47.5353	9.90576	1.3809	1.25404		1.31747	0.862114	0.915914		0.889014	1.48194	0.0248973
C0P4U8	Putative ATP synthase 24 kDa subunit mitochondrial	ZEAMMB73_Zm00001d053983	Putative ATP synthase 24 kDa subunit mitochondrial OS=Zea mays OX=4577 GN=ZEAMMB73_Zm00001d053983 PE=2 SV=1 - [C0P4U8_MAIZE]	28.81	1	9	37	243	27.5557	8.42627		1.2966	1.25936	1.27798		0.862159	0.865094	0.863627	1.47978	0.00202532
P25460	40S ribosomal protein S11	RPS11	40S ribosomal protein S11 OS=Zea mays OX=4577 GN=RPS11 PE=2 SV=1 - [RS11_MAIZE]	25.79	4	4	10	159	17.6786	10.5796	1.31729	1.41157	1.0993	1.27605	0.87556	0.860166	0.863937	0.866554	1.47256	0.0114849
B6TUK9	Basic blue protein	100284336	Basic blue protein OS=Zea mays OX=4577 GN=100284336 PE=2 SV=1 - [B6TUK9_MAIZE]	22.31	3	3	8	130	13.3939	9.93506	1.42514	1.11942	1.24654	1.2637	0.81848	0.924812	0.831642	0.858312	1.47231	0.0128745
B4F989	Actin-7	103635981	Actin-7 OS=Zea mays OX=4577 GN=103635981 PE=2 SV=1 - [B4F989_MAIZE]	59.15	4	16	130	377	41.6989	5.40186	1.18541	1.3328	1.18349	1.2339	0.843271	0.773475	0.902338	0.839695	1.46946	0.00311894
A0A1D6JTN4	Glutamine synthetase	ZEAMMB73_Zm00001d028260	Glutamine synthetase OS=Zea mays OX=4577 GN=ZEAMMB73_Zm00001d028260 PE=3 SV=1 - [A0A1D6JTN4_MAIZE]	35.21	7	9	58	338	36.8524	7.13721	1.38225	1.2847	1.17157	1.27951	0.836847	0.892888	0.883741	0.871159	1.46874	0.00297229
A0A1D6F974	Bifunctional inhibitor/lipid-transfer protein/seed storage 2S albumin superfamily protein	103648254	Bifunctional inhibitor/lipid-transfer protein/seed storage 2S albumin superfamily protein OS=Zea mays OX=4577 GN=103648254 PE=3 SV=1 - [A0A1D6F974_MAIZE]	10.5	2	2	7	181	16.8506	8.32373	1.43966	1.23889	1.13404	1.27086	0.830811	0.836227	0.932147	0.866395	1.46684	0.0133192
A0A1D6LN77	Peptidyl-prolyl cis-trans isomerase	ZEAMMB73_Zm00001d036442	Peptidyl-prolyl cis-trans isomerase OS=Zea mays OX=4577 GN=ZEAMMB73_Zm00001d036442 PE=3 SV=1 - [A0A1D6LN77_MAIZE]	28.84	2	7	31	215	23.1639	9.5542	1.35172	1.20026		1.27599	0.857224	0.884063		0.870644	1.46557	0.034168
B4FBC2	GDP-mannose 35-epimerase	100192102	GDP-mannose 35-epimerase OS=Zea mays OX=4577 GN=100192102 PE=2 SV=1 - [B4FBC2_MAIZE]	23.68	4	8	24	380	42.9382	6.41748	1.38393	1.22486	1.18865	1.26581	0.848529	0.87315	0.86944	0.863706	1.46556	0.00265445
B6TMB2	PDIL2-2-Zea mays protein disulfide isomerase		PDIL2-2-Zea mays protein disulfide isomerase OS=Zea mays OX=4577 PE=2 SV=1 - [B6TMB2_MAIZE]	18.8	6	7	12	367	40.1157	6.22705	1.48522	1.22953	1.09179	1.26885	0.796103	0.90978	0.891732	0.865872	1.4654	0.028752
A0A1D6KEP0	Serine hydroxymethyltransferase	ZEAMMB73_Zm00001d030859	Serine hydroxymethyltransferase OS=Zea mays OX=4577 GN=ZEAMMB73_Zm00001d030859 PE=3 SV=1 - [A0A1D6KEP0_MAIZE]	11.52	4	6	16	538	58.5097	7.73779	1.33845	1.17557		1.25701	0.822037	0.894431		0.858234	1.46465	0.0464948
A0A1D6HFM9	High mobility group box protein2	541951	High mobility group box protein2 OS=Zea mays OX=4577 GN=541951 PE=4 SV=1 - [A0A1D6HFM9_MAIZE]	7.29	1	1	4	96	10.8219	4.67822	1.35821	1.15763	1.17843	1.23142	0.772759	0.848065	0.901721	0.840848	1.4645	0.00613269
Q9S7Z7	HMGI/Y protein	hmgi/y	HMGI/Y protein OS=Zea mays OX=4577 GN=hmgi/y PE=4 SV=1 - [Q9S7Z7_MAIZE]	11.05	3	3	9	190	19.7494	10.3892	1.50333	1.23548	1.15524	1.29802	0.759975	0.972518	0.926537	0.886343	1.46446	0.0289884
B6T6S5	Glucose-6-phosphate 1-epimerase	100282376	Glucose-6-phosphate 1-epimerase OS=Zea mays OX=4577 GN=100282376 PE=2 SV=1 - [B6T6S5_MAIZE]	6.63	2	2	3	332	36.6037	6.69775	1.35884	1.21554		1.28719	0.914468	0.844393		0.87943	1.46366	0.0361956
B6SPF6	Uncharacterized protein		Uncharacterized protein OS=Zea mays OX=4577 PE=2 SV=1 - [B6SPF6_MAIZE]	15.69	1	1	8	51	5.39391	9.87646	1.29121	1.1924	1.29399	1.2592	0.848737	0.971569	0.763156	0.861154	1.46222	0.00450485
B4FRC9	Aldolase-type TIM barrel family protein	100284080	Aldolase-type TIM barrel family protein OS=Zea mays OX=4577 GN=100284080 PE=2 SV=1 - [B4FRC9_MAIZE]	17.95	2	8	34	429	46.2172	7.32764		1.25503	1.16624	1.21064		0.812182	0.845917	0.829049	1.46027	0.0151382
C0HG50	Uncharacterized protein		Uncharacterized protein OS=Zea mays OX=4577 PE=2 SV=1 - [C0HG50_MAIZE]	5.97	2	2	3	419	47.1981	6.55127	1.25066	1.41215	1.20394	1.28892	0.8818	0.83394	0.935961	0.8839	1.45822	0.00434683
B4FNZ2	Tubulin-specific chaperone A		Tubulin-specific chaperone A OS=Zea mays OX=4577 PE=2 SV=1 - [B4FNZ2_MAIZE]	15.18	2	2	4	112	12.5014	5.09717	1.50189	1.21977	1.15916	1.29361	0.775659	0.991484	0.896036	0.887726	1.45721	0.029698
B4FTJ6	Mitochondrial phosphate carrier protein 3 mitochondrial	103627788	Mitochondrial phosphate carrier protein 3 mitochondrial OS=Zea mays OX=4577 GN=103627788 PE=2 SV=1 - [B4FTJ6_MAIZE]	23.22	5	8	41	366	38.575	9.18799	1.37982	1.20241	1.14722	1.24315	0.811875	0.874509	0.874976	0.853787	1.45604	0.00601836
A0A1D6LFD9	LIM domain-containing protein WLIM1	541782	LIM domain-containing protein WLIM1 OS=Zea mays OX=4577 GN=541782 PE=4 SV=1 - [A0A1D6LFD9_MAIZE]	7.09	1	1	3	127	14.1779	8.95361	1.33871	1.30467	1.20471	1.2827	0.883332	0.884376	0.881798	0.883169	1.45238	0.000576623
B4G0K4	Phosphoglycerate kinase	100274579	Phosphoglycerate kinase OS=Zea mays OX=4577 GN=100274579 PE=2 SV=1 - [B4G0K4_MAIZE]	46.02	14	16	78	402	42.4127	5.87158	1.43609	1.21206	1.21106	1.2864	0.835978	0.964643	0.860597	0.887072	1.45016	0.00916875
B6SL60	Thioredoxin	100856910	Thioredoxin OS=Zea mays OX=4577 GN=100856910 PE=2 SV=1 - [B6SL60_MAIZE]	23.31	3	3	9	133	14.6123	6.55127	1.19496	1.17104	1.34804	1.23801	0.924416	0.892732	0.744369	0.853839	1.44993	0.00805934
K7VZN8	60S ribosomal protein L22-2	ZEAMMB73_Zm00001d047500	60S ribosomal protein L22-2 OS=Zea mays OX=4577 GN=ZEAMMB73_Zm00001d047500 PE=4 SV=1 - [K7VZN8_MAIZE]	44.62	5	6	19	130	14.2776	9.72998	1.2389	1.22357	1.25566	1.23938	0.937736	0.913653	0.714108	0.855166	1.44928	0.00578594
B6SUM0	Vacuolar protein sorting-associated protein 29	100281359	Vacuolar protein sorting-associated protein 29 OS=Zea mays OX=4577 GN=100281359 PE=2 SV=1 - [B6SUM0_MAIZE]	5.32	1	1	2	188	20.8668	6.65381		1.24504	1.14153	1.19328		0.829333	0.817402	0.823368	1.44927	0.0192642
B4FH68	Peroxidase	100194034	Peroxidase OS=Zea mays OX=4577 GN=100194034 PE=2 SV=1 - [B4FH68_MAIZE]	41.41	7	12	66	355	37.4708	6.66846	1.32704	1.01141	1.34914	1.2292	0.84703	0.9507	0.753166	0.850299	1.44561	0.0370029
Q0GR16	NADH-ubiquinone oxidoreductase chain 6	nad6	NADH-ubiquinone oxidoreductase chain 6 OS=Zea mays subsp. parviglumis OX=76912 GN=nad6 PE=3 SV=1 - [Q0GR16_ZEAMP]	6.82	2	2	4	220	24.8764	9.08545	1.32198	1.31872	1.19064	1.27711	0.868747	0.954224	0.827687	0.883553	1.44543	0.00232164
B4FDS5	Cytochrome P450 98A3	100274274	Cytochrome P450 98A3 OS=Zea mays OX=4577 GN=100274274 PE=2 SV=1 - [B4FDS5_MAIZE]	6.64	3	3	4	512	58.2375	8.99756	1.21347	1.27106		1.24226	0.886044	0.832985		0.859514	1.44531	0.0103024
Q5NKN3	DNA-binding protein MNB1B	nfd103	DNA-binding protein MNB1B OS=Zea mays OX=4577 GN=nfd103 PE=2 SV=1 - [Q5NKN3_MAIZE]	13.38	3	3	8	157	17.1356	5.94775	1.29683	1.22618	1.21211	1.24504	0.834332	0.876589	0.873791	0.861571	1.44508	0.000203434
B8A0Y5	Uncharacterized protein		Uncharacterized protein OS=Zea mays OX=4577 PE=2 SV=1 - [B8A0Y5_MAIZE]	9.59	2	2	3	271	30.456	6.20166	1.07805	1.33644	1.29989	1.23812	0.962654	0.796279	0.812953	0.857295	1.44422	0.0168792
A0A096S3Z9	Diacylglycerol kinase	100284664	Diacylglycerol kinase OS=Zea mays OX=4577 GN=100284664 PE=3 SV=1 - [A0A096S3Z9_MAIZE]	1.42	1	1	2	492	54.5279	7.91357		1.26143	1.19831	1.22987		0.859459	0.845005	0.852232	1.44312	0.00727008
B4FEE3	60S ribosomal protein L27	103642077	60S ribosomal protein L27 OS=Zea mays OX=4577 GN=103642077 PE=2 SV=1 - [B4FEE3_MAIZE]	26.28	1	4	19	137	15.6267	10.4624	1.15115		1.25707	1.20411	0.866561		0.805691	0.836126	1.44011	0.0264626
A0A1D6EGZ9	Eukaryotic initiation factor 5C CG2922-PF, isoform F	ZEAMMB73_Zm00001d004677	Eukaryotic initiation factor 5C CG2922-PF, isoform F OS=Zea mays OX=4577 GN=ZEAMMB73_Zm00001d004677 PE=4 SV=1 - [A0A1D6EGZ9_MAIZE]	20.11	1	7	35	378	43.8528	5.32568	1.27013	1.26829	1.19703	1.24515	0.876851	0.847804	0.873968	0.866208	1.43747	0.000124638
B6TPE4	Glutamate-1-semialdehyde 2,1-aminomutase		Glutamate-1-semialdehyde 2,1-aminomutase OS=Zea mays OX=4577 PE=2 SV=1 - [B6TPE4_MAIZE]	7.19	3	3	4	473	49.9944	6.55127	1.39239	1.11092	1.20035	1.23455	0.799421	0.919256	0.863539	0.860739	1.4343	0.0142006
A0A1D6PN47	ARM repeat superfamily protein	ZEAMMB73_Zm00001d048628	ARM repeat superfamily protein OS=Zea mays OX=4577 GN=ZEAMMB73_Zm00001d048628 PE=4 SV=1 - [A0A1D6PN47_MAIZE]	3.96	4	4	9	1035	114.049	4.64014	1.20437	1.3394		1.27188	0.909333	0.864908		0.88712	1.43372	0.0324683
A0A1D6HNL5	26S protease regulatory subunit 6A homolog A	ZEAMMB73_Zm00001d018409	26S protease regulatory subunit 6A homolog A OS=Zea mays OX=4577 GN=ZEAMMB73_Zm00001d018409 PE=3 SV=1 - [A0A1D6HNL5_MAIZE]	24.17	1	10	26	422	46.9452	5.10986	1.29901	1.22557		1.26229	0.887935	0.87841		0.883172	1.42927	0.0094058
A0A1D6HVU5	Cellulose synthase4	542624	Cellulose synthase4 OS=Zea mays OX=4577 GN=542624 PE=3 SV=1 - [A0A1D6HVU5_MAIZE]	4.24	1	3	7	779	87.5334	8.55811	1.20966	1.29908		1.25437	0.901478	0.855425		0.878452	1.42793	0.0174301
B6T9I8	Uncharacterized protein	100276373	Uncharacterized protein OS=Zea mays OX=4577 GN=100276373 PE=2 SV=1 - [B6T9I8_MAIZE]	3.89	1	1	2	257	27.9146	8.26514	1.27703	1.2342		1.25561	0.849463	0.911485		0.880474	1.42607	0.00994218
C0P5Y3	5-methyltetrahydropteroyltriglutamate--homocysteine methyltransferase 1	541942	5-methyltetrahydropteroyltriglutamate--homocysteine methyltransferase 1 OS=Zea mays OX=4577 GN=541942 PE=2 SV=1 - [C0P5Y3_MAIZE]	39.95	17	26	220	766	84.4393	5.77002	1.30785	1.2641	1.13571	1.23589	0.850922	0.886533	0.865943	0.867799	1.42416	0.00220687
A0A317Y4C0	Ran-binding protein 1 c	RANBP1C_1	Ran-binding protein 1 c OS=Zea mays OX=4577 GN=RANBP1C_1 PE=4 SV=1 - [A0A317Y4C0_MAIZE]	11.48	3	3	6	209	23.1493	4.77979	1.34855	1.51532	1.06576	1.30988	0.894876	0.858937	1.0059	0.919906	1.42393	0.048003
A0A1D6NYF1	Restorer of fertility2	732806	Restorer of fertility2 OS=Zea mays OX=4577 GN=732806 PE=3 SV=1 - [A0A1D6NYF1_MAIZE]	27.2	11	11	27	511	55.6588	6.48096	1.18662	1.14449	1.18851	1.17321	0.792939	0.883256	0.797471	0.824555	1.42283	0.000438561
B7ZX16	Uncharacterized protein		Uncharacterized protein OS=Zea mays OX=4577 PE=2 SV=1 - [B7ZX16_MAIZE]	7.95	1	1	2	151	17.1552	8.44092		1.16394	1.23431	1.19913		0.878554	0.807498	0.843026	1.42241	0.0191497
C0P4K4	L-ascorbate peroxidase S chloroplastic/mitochondrial	100193740	L-ascorbate peroxidase S chloroplastic/mitochondrial OS=Zea mays OX=4577 GN=100193740 PE=2 SV=1 - [C0P4K4_MAIZE]	20.13	3	5	16	313	34.1126	7.92822	1.23252	1.1517	1.3245	1.23624	0.90386	0.937346	0.767311	0.869506	1.42178	0.00704387
A0A317YAW0	Germin-like protein 3-6	Os03g0694000_0	Germin-like protein 3-6 OS=Zea mays OX=4577 GN=Os03g0694000_0 PE=3 SV=1 - [A0A317YAW0_MAIZE]	26.67	5	5	15	225	23.7573	6.31592	1.33863	1.14462	1.24502	1.24276	0.862628	0.922647	0.838466	0.87458	1.42097	0.00388028
B6T6B3	Eukaryotic translation initiation factor 3 subunit M		Eukaryotic translation initiation factor 3 subunit M OS=Zea mays OX=4577 PE=2 SV=1 - [B6T6B3_MAIZE]	17.35	6	6	10	415	46.2399	5.30029	1.20599	1.26122	1.20882	1.22534	0.879834	0.863037	0.844306	0.862392	1.42086	6.19091e-05
B6SZS2	40S ribosomal protein S9	100192774	40S ribosomal protein S9 OS=Zea mays OX=4577 GN=100192774 PE=2 SV=1 - [B6SZS2_MAIZE]	41.45	3	10	45	193	22.5331	10.2134	1.44778	1.16321	1.15793	1.25631	0.838107	0.921662	0.892862	0.88421	1.42082	0.0196928
K7UEK4	UDP-N-acetylglucosamine diphosphorylase 2	100383496	UDP-N-acetylglucosamine diphosphorylase 2 OS=Zea mays OX=4577 GN=100383496 PE=4 SV=1 - [K7UEK4_MAIZE]	5.27	1	3	6	493	54.8207	6.62451		1.18052	1.19	1.18526		0.849726	0.821233	0.83548	1.41866	0.00183761
B4FFV2	SWIB/MDM2 domain superfamily protein	ZEAMMB73_Zm00001d053979	SWIB/MDM2 domain superfamily protein OS=Zea mays OX=4577 GN=ZEAMMB73_Zm00001d053979 PE=2 SV=1 - [B4FFV2_MAIZE]	29.1	4	4	8	134	13.9966	10.521	1.30975	1.29396	1.12022	1.24131	0.887796	0.841625	0.895931	0.875117	1.41845	0.0043665
B6SUP6	Mitochondrial import inner membrane translocase subunit Tim17		Mitochondrial import inner membrane translocase subunit Tim17 OS=Zea mays OX=4577 PE=2 SV=1 - [B6SUP6_MAIZE]	4.09	1	1	3	220	22.5951	5.33838	1.28875	1.23249	1.20496	1.24207	0.83841	0.940872	0.853302	0.877528	1.41542	0.000832943
B6UDY2	60S ribosomal protein L17		60S ribosomal protein L17 OS=Zea mays OX=4577 PE=2 SV=1 - [B6UDY2_MAIZE]	41.52	6	9	28	171	19.4903	10.2573	1.31249	1.27536	1.16085	1.24957	0.881673	0.900339	0.86947	0.883827	1.41381	0.00141327
C0PA04	Uncharacterized protein		Uncharacterized protein OS=Zea mays OX=4577 PE=2 SV=1 - [C0PA04_MAIZE]	8	1	1	3	200	20.5997	6.78564	1.40217	1.13645	1.1097	1.21611	0.8042	0.864202	0.93234	0.866914	1.4028	0.0254154
B6SRI4	14-3-3-like protein	103643291	14-3-3-like protein OS=Zea mays OX=4577 GN=103643291 PE=2 SV=1 - [B6SRI4_MAIZE]	54.69	3	12	82	256	28.9295	4.88135	1.2536	1.19818	1.27198	1.24125	0.930686	0.888919	0.842821	0.887475	1.39863	0.000465624
B4FLE0	O-methyltransferase ZRP4	ZEAMMB73_Zm00001d049020	O-methyltransferase ZRP4 OS=Zea mays OX=4577 GN=ZEAMMB73_Zm00001d049020 PE=2 SV=1 - [B4FLE0_MAIZE]	4.95	2	2	8	364	39.6753	5.93506	1.22577	1.02978	1.11317	1.12291	0.800069	0.869344	0.741233	0.803548	1.39744	0.00923168
B4FNP2	Phosphoribosylglycinamide formyltransferase chloroplastic	100272448	Phosphoribosylglycinamide formyltransferase chloroplastic OS=Zea mays OX=4577 GN=100272448 PE=2 SV=1 - [B4FNP2_MAIZE]	12.85	3	3	5	288	30.6872	8.99756	1.23786	1.3244	1.16091	1.24106	0.890332	0.834733	0.939869	0.888311	1.39709	0.00327734
A0A1D6P5E3	Grx_C4-glutaredoxin subgroup I	100282495	Grx_C4-glutaredoxin subgroup I OS=Zea mays OX=4577 GN=100282495 PE=4 SV=1 - [A0A1D6P5E3_MAIZE]	33.61	3	3	8	119	12.8558	8.6167	1.14372	1.26596	1.12318	1.17762	0.864432	0.899081	0.768006	0.84384	1.39555	0.00491897
B4F8B1	Transcription factor IIS protein	100274429	Transcription factor IIS protein OS=Zea mays OX=4577 GN=100274429 PE=2 SV=1 - [B4F8B1_MAIZE]	2.72	1	1	2	367	41.0969	8.96826	1.19498	1.26445		1.22972	0.894718	0.869107		0.881913	1.39438	0.0111407
B6T3X3	Hydrolase, carbon-nitrogen family		Hydrolase, carbon-nitrogen family OS=Zea mays OX=4577 PE=2 SV=1 - [B6T3X3_MAIZE]	17.57	3	3	4	222	24.7444	5.12256	1.24791	1.21005		1.22898	0.909862	0.858453		0.884158	1.39	0.00846114
A0A317Y8A9	Mitochondrial import receptor subunit TOM40-1	TOM40-1_3	Mitochondrial import receptor subunit TOM40-1 OS=Zea mays OX=4577 GN=TOM40-1_3 PE=4 SV=1 - [A0A317Y8A9_MAIZE]	10.73	3	3	6	317	34.8755	7.79639	1.30066	1.00864	1.25784	1.18905	0.828543	0.960136	0.779472	0.85605	1.38899	0.034622
B4FL64	Ribosomal protein L19	100282430	Ribosomal protein L19 OS=Zea mays OX=4577 GN=100282430 PE=2 SV=1 - [B4FL64_MAIZE]	30.92	1	6	22	207	24.0994	11.4438	1.24121	1.07055	1.23008	1.18062	0.876705	0.939573	0.740259	0.852179	1.38541	0.015175
A0A1D6NS07	GLABRA2 expression modulator	ZEAMMB73_Zm00001d044880	GLABRA2 expression modulator OS=Zea mays OX=4577 GN=ZEAMMB73_Zm00001d044880 PE=4 SV=1 - [A0A1D6NS07_MAIZE]	12.57	2	2	6	167	18.4793	7.2251	1.29019	1.22491	1.17325	1.22945	0.91535	0.910042	0.837442	0.887611	1.38512	0.00125632
A0A1D6J241	Sucrose-phosphatase 2	542661	Sucrose-phosphatase 2 OS=Zea mays OX=4577 GN=542661 PE=4 SV=1 - [A0A1D6J241_MAIZE]	4.2	1	1	2	333	37.0789	6.29053	1.25227	1.22939		1.24083	0.900458	0.891693		0.896075	1.38474	0.00126049
B6U893	Uncharacterized protein		Uncharacterized protein OS=Zea mays OX=4577 PE=2 SV=1 - [B6U893_MAIZE]	7.38	1	1	4	122	12.574	8.49951	1.19688	1.3307		1.26379	0.929954	0.897185		0.913569	1.38335	0.0365806
K7ULE9	Extensin-like protein	103641995	Extensin-like protein OS=Zea mays OX=4577 GN=103641995 PE=4 SV=1 - [K7ULE9_MAIZE]	16.41	1	2	12	128	13.0568	8.35303	1.26184		1.15778	1.20981	0.902951		0.849983	0.876467	1.38033	0.0293321
B4FS65	Cysteine proteinases superfamily protein	ZEAMMB73_Zm00001d005391	Cysteine proteinases superfamily protein OS=Zea mays OX=4577 GN=ZEAMMB73_Zm00001d005391 PE=2 SV=1 - [B4FS65_MAIZE]	6.15	2	2	4	374	39.9305	6.771	1.11363	1.33229	1.206	1.21731	0.884907	0.869046	0.894679	0.882877	1.3788	0.00633667
A0A1D6ELY8	Arogenate dehydratase	ZEAMMB73_Zm00001d005351	Arogenate dehydratase OS=Zea mays OX=4577 GN=ZEAMMB73_Zm00001d005351 PE=4 SV=1 - [A0A1D6ELY8_MAIZE]	12.8	2	4	9	422	45.5151	6.63916	1.18182	1.23094	1.13829	1.18368	0.948148	0.787408	0.844284	0.859947	1.37646	0.00393007
B6T999	Notchless-like protein isoform 1	100282591	Notchless-like protein isoform 1 OS=Zea mays OX=4577 GN=100282591 PE=2 SV=1 - [B6T999_MAIZE]	5.31	2	2	4	471	52.1134	8.45557	1.23578	1.2069	1.17628	1.20632	0.928995	0.890935	0.820318	0.880083	1.37069	0.000837469
B4FSM5	Peroxiredoxin-2F mitochondrial	100273860	Peroxiredoxin-2F mitochondrial OS=Zea mays OX=4577 GN=100273860 PE=2 SV=1 - [B4FSM5_MAIZE]	5.7	1	1	5	193	20.7227	8.36768	1.28435	1.11319	1.1706	1.18938	0.898265	0.887267	0.817701	0.867744	1.37066	0.00463229
A0A1D6N5J4	Pectinesterase	ZEAMMB73_Zm00001d042625	Pectinesterase OS=Zea mays OX=4577 GN=ZEAMMB73_Zm00001d042625 PE=4 SV=1 - [A0A1D6N5J4_MAIZE]	8.64	1	1	2	220	24.251	6.94678		1.24113	1.13323	1.18718		0.902297	0.830249	0.866273	1.37044	0.0385193
B6SP44	Glutamate carboxypeptidase 2	100280900	Glutamate carboxypeptidase 2 OS=Zea mays OX=4577 GN=100280900 PE=2 SV=1 - [B6SP44_MAIZE]	9.76	7	7	13	738	80.5786	6.39209	1.36378	1.10307	1.14118	1.20268	0.799868	0.944009	0.896924	0.880267	1.36626	0.0245471
A0A1D6L9A0	40S ribosomal protein S26	100193263	40S ribosomal protein S26 OS=Zea mays OX=4577 GN=100193263 PE=3 SV=1 - [A0A1D6L9A0_MAIZE]	43.94	3	4	7	132	14.8218	11.0337	1.30861	1.20274	1.16435	1.22524	0.823752	0.941608	0.930453	0.898604	1.36349	0.0046507
B8A326	Plasma membrane ATPase		Plasma membrane ATPase OS=Zea mays OX=4577 PE=2 SV=1 - [B8A326_MAIZE]	28.6	5	24	141	951	104.733	6.60986	1.04592	1.24631	1.30539	1.1992	1.00563	0.840591	0.793303	0.879843	1.36298	0.0346595
C0P4G2	Allene oxide synthase1	542150	Allene oxide synthase1 OS=Zea mays OX=4577 GN=542150 PE=2 SV=1 - [C0P4G2_MAIZE]	40.66	8	18	84	482	53.0013	7.00537	1.24838	1.10916	1.11268	1.15674	0.846548	0.797389	0.906293	0.850077	1.36075	0.00527607
A0A1D6L861	50S ribosomal protein L4	rplD	50S ribosomal protein L4 OS=Zea mays OX=4577 GN=rplD PE=3 SV=1 - [A0A1D6L861_MAIZE]	11.26	3	3	7	293	32.6877	10.3599	1.16958	1.17255	1.22799	1.19004	0.887491	0.93887	0.800034	0.875465	1.35932	0.00215915
A0A1D6F256	Peroxidase	103647877	Peroxidase OS=Zea mays OX=4577 GN=103647877 PE=3 SV=1 - [A0A1D6F256_MAIZE]	10.87	3	3	4	368	39.5572	8.85107	1.25144		1.27	1.26072	0.924616		0.932532	0.928574	1.3577	0.00092158
B4FFP6	Nascent polypeptide-associated complex subunit beta	100193616	Nascent polypeptide-associated complex subunit beta OS=Zea mays OX=4577 GN=100193616 PE=2 SV=1 - [B4FFP6_MAIZE]	12.03	2	2	4	158	17.3041	8.85107	1.103	1.3121	1.16793	1.19434	0.906148	0.866945	0.871163	0.881419	1.35502	0.00767777
B6TMW7	Transaminase/ transferase, transferring nitrogenous groups	100285201	Transaminase/ transferase, transferring nitrogenous groups OS=Zea mays OX=4577 GN=100285201 PE=2 SV=1 - [B6TMW7_MAIZE]	14.47	4	4	11	394	43.5031	5.19873	1.32551	1.16733	1.12745	1.20676	0.877023	0.903679	0.892102	0.890935	1.35449	0.00660491
B6TEJ4	Peptidase C15 pyroglutamyl peptidase I-like	100283087	Peptidase C15 pyroglutamyl peptidase I-like OS=Zea mays OX=4577 GN=100283087 PE=2 SV=1 - [B6TEJ4_MAIZE]	15.45	3	3	6	220	23.9904	7.1665	1.08958	1.13086	1.18853	1.13632	0.957268	0.864576	0.696771	0.839538	1.35351	0.0218962
B4FNM4	60S acidic ribosomal protein P0	ZEAMMB73_Zm00001d035201	60S acidic ribosomal protein P0 OS=Zea mays OX=4577 GN=ZEAMMB73_Zm00001d035201 PE=2 SV=1 - [B4FNM4_MAIZE]	25.08	1	6	38	319	34.4671	5.30029	1.22523	1.18988	1.27939	1.2315	0.897424	0.961756	0.873335	0.910838	1.35205	0.000982322
K7VIL3	Methionine S-methyltransferase	541786	Methionine S-methyltransferase OS=Zea mays OX=4577 GN=541786 PE=3 SV=1 - [K7VIL3_MAIZE]	14.85	1	14	47	1091	120.195	5.88428	1.25251	1.26045	1.16327	1.22541	0.929505	0.898363	0.89374	0.907203	1.35076	0.000655774
B4FQR3	Aldose reductase	AR4	Aldose reductase OS=Zea mays OX=4577 GN=AR4 PE=2 SV=1 - [B4FQR3_MAIZE]	4.86	1	2	5	329	36.0836	6.44287	1.16661	1.09731	1.22656	1.16349	0.884205	0.902198	0.799696	0.862033	1.34971	0.00351895
A0A1D6NKW5	SNF1-related protein kinase regulatory subunit gamma-1-like	100286384	SNF1-related protein kinase regulatory subunit gamma-1-like OS=Zea mays OX=4577 GN=100286384 PE=4 SV=1 - [A0A1D6NKW5_MAIZE]	18.73	5	5	13	267	31.1183	4.93213	1.20224	1.05149	1.19089	1.14821	0.891251	0.762791	0.902466	0.852169	1.34739	0.0109487
B4FSL2	40S ribosomal protein S25-2	ZEAMMB73_Zm00001d031939	40S ribosomal protein S25-2 OS=Zea mays OX=4577 GN=ZEAMMB73_Zm00001d031939 PE=2 SV=1 - [B4FSL2_MAIZE]	40.74	1	4	11	108	12.0097	10.5942	1.35161	1.09662	1.15878	1.20233	0.827946	0.972324	0.877903	0.892724	1.34681	0.02419
A0A1D6HCE3	26S proteasome non-ATPase regulatory subunit 6-like protein	100282303	26S proteasome non-ATPase regulatory subunit 6-like protein OS=Zea mays OX=4577 GN=100282303 PE=4 SV=1 - [A0A1D6HCE3_MAIZE]	19.94	7	7	21	361	41.1395	6.39209	1.22383	1.1914	1.17365	1.19629	0.898606	0.89862	0.871084	0.889437	1.345	5.96304e-05
B4FNZ6	Seven transmembrane domain protein	100273830	Seven transmembrane domain protein OS=Zea mays OX=4577 GN=100273830 PE=2 SV=1 - [B4FNZ6_MAIZE]	6.61	2	2	5	227	25.4573	8.44092	1.25573	1.11511	1.16964	1.18016	0.882222	0.936498	0.817537	0.878752	1.34299	0.00487147
A0A1D6H8V5	Ubiquitin-associated (UBA)/TS-N domain-containing protein	ZEAMMB73_Zm00001d016552	Ubiquitin-associated (UBA)/TS-N domain-containing protein OS=Zea mays OX=4577 GN=ZEAMMB73_Zm00001d016552 PE=4 SV=1 - [A0A1D6H8V5_MAIZE]	8.11	1	1	2	111	12.5725	6.12549	1.19436	1.22115		1.20776	0.910191	0.890599		0.900395	1.34137	0.00290238
B6T098	60S ribosomal protein L34		60S ribosomal protein L34 OS=Zea mays OX=4577 PE=2 SV=1 - [B6T098_MAIZE]	31.09	4	4	16	119	13.7358	11.4878	1.20366	1.28141	1.16808	1.21772	0.953677	0.848033	0.922106	0.907939	1.34119	0.00249767
B6SJ40	Pollen Ole e 1 allergen and extensin family protein	MGS1_3	Pollen Ole e 1 allergen and extensin family protein OS=Zea mays OX=4577 GN=MGS1_3 PE=2 SV=1 - [B6SJ40_MAIZE]	5.23	1	1	2	172	18.4433	7.6499	1.18466		1.14514	1.1649	0.89279		0.846007	0.869399	1.33989	0.0105689
A0A1D6LDB9	Uncharacterized protein	ZEAMMB73_Zm00001d034970	Uncharacterized protein OS=Zea mays OX=4577 GN=ZEAMMB73_Zm00001d034970 PE=4 SV=1 - [A0A1D6LDB9_MAIZE]	10.44	1	4	14	412	44.453	6.23975		1.15561	1.17069	1.16315		0.926257	0.810502	0.868379	1.33945	0.0370423
B4FVJ0	60S ribosomal protein L4-1	ZEAMMB73_Zm00001d007824	60S ribosomal protein L4-1 OS=Zea mays OX=4577 GN=ZEAMMB73_Zm00001d007824 PE=2 SV=1 - [B4FVJ0_MAIZE]	46.53	3	16	99	404	44.3839	10.5063	1.20943	1.28241	1.11137	1.20107	0.88673	0.888664	0.915014	0.896803	1.33928	0.00379126
B4FER8	Acyl-CoA-binding protein		Acyl-CoA-binding protein OS=Zea mays OX=4577 PE=2 SV=1 - [B4FER8_MAIZE]	69.66	4	5	16	89	10.12	5.07178	1.22194	1.25867	1.15453	1.21171	0.854518	0.931814	0.928916	0.905083	1.33879	0.00150158
A0A1D6FYR3	Transcriptional corepressor LEUNIG	100217300	Transcriptional corepressor LEUNIG OS=Zea mays OX=4577 GN=100217300 PE=4 SV=1 - [A0A1D6FYR3_MAIZE]	2.31	2	2	2	821	90.7446	8.04541	1.15107		1.26043	1.20575	0.899403		0.904122	0.901763	1.33711	0.0309193
B6TSB3	Glucose-6-phosphate 1-dehydrogenase	100284317	Glucose-6-phosphate 1-dehydrogenase OS=Zea mays OX=4577 GN=100284317 PE=2 SV=1 - [B6TSB3_MAIZE]	16.17	2	9	28	507	57.5926	6.771	1.14041	1.16398	1.17266	1.15902	0.902684	0.911849	0.789849	0.868128	1.33508	0.0019708
A0A1D6LII9	Leucine-rich repeat (LRR) family protein	103629296	Leucine-rich repeat (LRR) family protein OS=Zea mays OX=4577 GN=103629296 PE=4 SV=1 - [A0A1D6LII9_MAIZE]	10.29	3	3	7	350	36.9476	5.26221	1.33239	1.16686	1.14128	1.21351	0.861356	0.887438	0.978609	0.909134	1.3348	0.0119661
K7VHA0	5-pentadecatrienyl resorcinol O-methyltransferase	103639000	5-pentadecatrienyl resorcinol O-methyltransferase OS=Zea mays OX=4577 GN=103639000 PE=3 SV=1 - [K7VHA0_MAIZE]	4.14	2	2	6	362	39.431	5.93506	1.25086	1.17013	1.04008	1.15369	0.792972	0.881574	0.931042	0.86853	1.32833	0.0178376
A0A1D6LXE3	Binding	ZEAMMB73_Zm00001d037377	Binding OS=Zea mays OX=4577 GN=ZEAMMB73_Zm00001d037377 PE=4 SV=1 - [A0A1D6LXE3_MAIZE]	1.85	2	2	3	1187	133.306	5.73193	1.0961	1.03675		1.06643	0.82698	0.782599		0.80479	1.3251	0.0194715
A0A1D6M9R8	PLASMODESMATA CALLOSE-BINDING PROTEIN 2	100279409	PLASMODESMATA CALLOSE-BINDING PROTEIN 2 OS=Zea mays OX=4577 GN=100279409 PE=4 SV=1 - [A0A1D6M9R8_MAIZE]	7.44	1	1	5	121	11.7976	8.35303	1.19376	1.25358	1.06089	1.16941	0.903992	0.927175	0.818706	0.883291	1.32392	0.0121748
A0A1D6NCY7	Peptidase M28 family protein	100280279	Peptidase M28 family protein OS=Zea mays OX=4577 GN=100280279 PE=4 SV=1 - [A0A1D6NCY7_MAIZE]	2.36	2	2	3	721	78.5716	6.15088	1.38198	1.0943	1.13301	1.20309	0.825659	0.975762	0.925351	0.908924	1.32364	0.0427508
B4FA75	Uncharacterized protein		Uncharacterized protein OS=Zea mays OX=4577 PE=2 SV=1 - [B4FA75_MAIZE]	7.07	3	3	3	481	49.7911	7.29834	1.1412	1.21716		1.17918	0.922602	0.863496		0.893049	1.3204	0.0271397
B4G178	ADP,ATP carrier protein	ZEAMMB73_Zm00001d017857	ADP,ATP carrier protein OS=Zea mays OX=4577 GN=ZEAMMB73_Zm00001d017857 PE=2 SV=1 - [B4G178_MAIZE]	23.51	1	10	121	387	42.3648	9.84717	1.21821	1.23958	1.09028	1.18269	0.914182	0.883975	0.890577	0.896245	1.31961	0.00381324
B6SVS6	Asparaginyl-tRNA synthetase, cytoplasmic 3		Asparaginyl-tRNA synthetase, cytoplasmic 3 OS=Zea mays OX=4577 PE=2 SV=1 - [B6SVS6_MAIZE]	15.33	9	9	31	561	62.6253	5.96045	1.30388	1.18589	1.09059	1.19346	0.895499	0.911418	0.907171	0.904696	1.31918	0.00953839
B4FVX8	Dirigent protein	100285709	Dirigent protein OS=Zea mays OX=4577 GN=100285709 PE=2 SV=1 - [B4FVX8_MAIZE]	4.57	1	1	5	175	18.4145	7.13721	1.3009	1.2221	1.11542	1.21281	0.888416	0.92967	0.943257	0.920448	1.31763	0.00651355
A0A317YH60	Protein STRICTOSIDINE SYNTHASE-LIKE 3	SSL3_3	Protein STRICTOSIDINE SYNTHASE-LIKE 3 OS=Zea mays OX=4577 GN=SSL3_3 PE=4 SV=1 - [A0A317YH60_MAIZE]	4.52	2	2	3	398	44.1745	6.80029	1.12742		1.20627	1.16685	0.93398		0.840154	0.887067	1.3154	0.0447762
A0A1D6P548	Uncharacterized protein	ZEAMMB73_Zm00001d046828	Uncharacterized protein OS=Zea mays OX=4577 GN=ZEAMMB73_Zm00001d046828 PE=3 SV=1 - [A0A1D6P548_MAIZE]	4.47	1	1	3	246	27.0653	6.53662	1.2332	1.096	1.14478	1.15799	0.915567	0.92733	0.799925	0.880941	1.31449	0.00834572
A0A1D6FQI8	Cation-transporting ATPase	ZEAMMB73_Zm00001d010324	Cation-transporting ATPase OS=Zea mays OX=4577 GN=ZEAMMB73_Zm00001d010324 PE=3 SV=1 - [A0A1D6FQI8_MAIZE]	2.15	2	2	5	932	102.883	7.32764	1.07916	1.07589	1.3241	1.15972	0.964957	0.852613	0.829284	0.882285	1.31445	0.0396534
B6TRL7	Uncharacterized protein		Uncharacterized protein OS=Zea mays OX=4577 PE=2 SV=1 - [B6TRL7_MAIZE]	7.69	1	1	5	143	15.8324	10.3452	1.30435	1.14013	1.11083	1.18511	0.840765	1.01759	0.847701	0.902017	1.31384	0.0275058
B6TAE7	Tropinone reductase	100282692	Tropinone reductase OS=Zea mays OX=4577 GN=100282692 PE=2 SV=1 - [B6TAE7_MAIZE]	18.68	4	4	11	273	29.0709	7.34229	1.17087	1.08005	1.21752	1.15615	0.901895	0.890075	0.852981	0.88165	1.31134	0.00308174
B4FUV5	AT-hook motif nuclear-localized protein 26	100273351	AT-hook motif nuclear-localized protein 26 OS=Zea mays OX=4577 GN=100273351 PE=2 SV=1 - [B4FUV5_MAIZE]	4.53	1	1	3	309	31.5298	6.52197	1.32214	1.1166	1.18059	1.20644	0.841706	0.972903	0.945483	0.92003	1.31131	0.0169583
A0A1D6H407	ADP-ribosylation factor GTPase-activating protein AGD12	100382772	ADP-ribosylation factor GTPase-activating protein AGD12 OS=Zea mays OX=4577 GN=100382772 PE=4 SV=1 - [A0A1D6H407_MAIZE]	12.9	4	4	7	310	33.9439	5.021	1.25925	1.16147	1.12032	1.18035	0.908022	0.930504	0.864996	0.901174	1.30979	0.00356614
A0A1D6QMX9	26S proteasome non-ATPase regulatory subunit 3 homolog A	ZEAMMB73_Zm00001d053232	26S proteasome non-ATPase regulatory subunit 3 homolog A OS=Zea mays OX=4577 GN=ZEAMMB73_Zm00001d053232 PE=4 SV=1 - [A0A1D6QMX9_MAIZE]	34.88	2	16	46	473	53.5638	7.79639	1.3048	1.15762	1.1644	1.20894	0.888866	0.927299	0.953621	0.923262	1.30942	0.00517509
B6T7Q7	Serine hydroxymethyltransferase		Serine hydroxymethyltransferase OS=Zea mays OX=4577 PE=2 SV=1 - [B6T7Q7_MAIZE]	18.52	9	9	20	513	56.4991	8.51416	1.14938	1.18356	1.15023	1.16105	0.941616	0.864903	0.857837	0.888119	1.30732	0.000719116
A0A1D6MM59	Uncharacterized protein	100382048	Uncharacterized protein OS=Zea mays OX=4577 GN=100382048 PE=4 SV=1 - [A0A1D6MM59_MAIZE]	12.59	4	9	18	580	62.9267	8.93896	1.20382	1.15356	1.15443	1.1706	0.908876	0.893069	0.885492	0.895813	1.30675	0.000106965
C0PCV6	Uncharacterized protein		Uncharacterized protein OS=Zea mays OX=4577 PE=2 SV=1 - [C0PCV6_MAIZE]	3.24	1	1	3	247	26.9861	4.42432	1.17742	1.14293	1.3043	1.20822	0.912868	1.02179	0.84341	0.926024	1.30473	0.016808
B4F9K0	Late embryogenesis abundant protein group 2	100191638	Late embryogenesis abundant protein group 2 OS=Zea mays OX=4577 GN=100191638 PE=2 SV=1 - [B4F9K0_MAIZE]	22.57	6	6	12	319	35.2522	5.10986	1.16591	1.24505	1.13641	1.18246	0.978229	0.881302	0.859787	0.906439	1.30451	0.00480599
B6SMB0	Cytochrome b-c1 complex subunit 6	ZEAMMB73_Zm00001d050696	Cytochrome b-c1 complex subunit 6 OS=Zea mays OX=4577 GN=ZEAMMB73_Zm00001d050696 PE=2 SV=1 - [B6SMB0_MAIZE]	30.43	2	2	4	69	8.29392	5.90967	1.19071	1.22077	1.0934	1.16829	0.867239	0.893127	0.92697	0.895778	1.30422	0.00294819
A0A1D6KTS3	Nucleolin 2	ZEAMMB73_Zm00001d032748	Nucleolin 2 OS=Zea mays OX=4577 GN=ZEAMMB73_Zm00001d032748 PE=4 SV=1 - [A0A1D6KTS3_MAIZE]	6.9	3	5	7	768	81.2333	5.03369	1.1474	1.22685	1.15689	1.17705	0.916501	0.911985	0.881999	0.903495	1.30277	0.000556836
A0A1D6H505	D-amino-acid transaminase chloroplastic	ZEAMMB73_Zm00001d016006	D-amino-acid transaminase chloroplastic OS=Zea mays OX=4577 GN=ZEAMMB73_Zm00001d016006 PE=4 SV=1 - [A0A1D6H505_MAIZE]	7.27	3	3	3	399	42.7356	7.12256	1.1686	1.23789		1.20324	0.973962	0.874632		0.924297	1.30179	0.0440335
B6TU01	Uncharacterized protein	100278693	Uncharacterized protein OS=Zea mays OX=4577 GN=100278693 PE=2 SV=1 - [B6TU01_MAIZE]	16.06	1	2	8	137	15.569	9.51025	1.14563		1.2073	1.17646	0.909425		0.898722	0.904073	1.30129	0.0129448
B8QV05	Chitinase	chiB	Chitinase OS=Zea mays subsp. parviglumis OX=76912 GN=chiB PE=4 SV=1 - [B8QV05_ZEAMP]	20.73	4	5	15	275	28.6016	8.54346	1.30509	1.0149	1.16861	1.16287	0.826213	0.974143	0.884772	0.895042	1.29923	0.0467378
A0A1D6KMV3	Transmembrane 9 superfamily member	103643205	Transmembrane 9 superfamily member OS=Zea mays OX=4577 GN=103643205 PE=3 SV=1 - [A0A1D6KMV3_MAIZE]	2.57	1	1	3	544	62.0698	6.45557	1.2144	1.09177	1.17933	1.16183	0.924446	0.903028	0.855753	0.894409	1.299	0.00304666
A0A1D6JYK5	Calcium pump2	ZEAMMB73_Zm00001d028687	Calcium pump2 OS=Zea mays OX=4577 GN=ZEAMMB73_Zm00001d028687 PE=3 SV=1 - [A0A1D6JYK5_MAIZE]	9.05	4	10	31	1061	115.222	5.52881	1.17735	1.14805	1.08123	1.13554	0.923654	0.80337	0.896794	0.874606	1.29835	0.00485371
B4FG22	40S ribosomal protein S25-1	100193720	40S ribosomal protein S25-1 OS=Zea mays OX=4577 GN=100193720 PE=2 SV=1 - [B4FG22_MAIZE]	40.74	1	4	10	108	12.0146	10.5063	1.15508	1.19855		1.17682	0.901578	0.911909		0.906744	1.29785	0.00677395
A0A1D6ES19	Heat shock protein 90-2	103647533	Heat shock protein 90-2 OS=Zea mays OX=4577 GN=103647533 PE=3 SV=1 - [A0A1D6ES19_MAIZE]	27.22	1	17	120	698	80.1218	5.09717	1.17502	1.19382	1.12265	1.16383	0.863448	0.936737	0.890834	0.897006	1.29746	0.000902882
A1XCI0	Lipoxygenase	LOX5	Lipoxygenase OS=Zea mays OX=4577 GN=LOX5 PE=2 SV=1 - [A1XCI0_MAIZE]	15.78	5	14	38	887	100.294	6.84424	0.96959	1.11786	1.05907	1.04884	0.893514	0.734673	0.797433	0.80854	1.2972	0.0190463
B4F9X0	Alpha-galactosidase		Alpha-galactosidase OS=Zea mays OX=4577 PE=2 SV=1 - [B4F9X0_MAIZE]	13.77	3	5	12	414	45.1283	6.01123	1.07435		1.12502	1.09969	0.849253		0.848201	0.848727	1.29569	0.0100413
B4FU88	Peroxidase	100273283	Peroxidase OS=Zea mays OX=4577 GN=100273283 PE=2 SV=1 - [B4FU88_MAIZE]	17.12	3	4	8	368	38.2761	5.41455	1.03676	1.16878	1.21507	1.1402	0.938129	0.907026	0.795833	0.880329	1.2952	0.0193869
Q7SIC9	Transketolase, chloroplastic		Transketolase, chloroplastic OS=Zea mays OX=4577 PE=1 SV=1 - [TKTC_MAIZE]	26.67	15	15	49	675	72.9476	5.71924	1.19686	1.20276	1.15719	1.1856	0.95223	0.908455	0.886228	0.915638	1.29484	0.000361473
B4FRQ8	Spermidine hydroxycinnamoyl transferase	100279982	Spermidine hydroxycinnamoyl transferase OS=Zea mays OX=4577 GN=100279982 PE=2 SV=1 - [B4FRQ8_MAIZE]	5.39	2	2	6	427	46.5399	7.6792	1.08408	1.11122	1.12118	1.10549	0.865704	0.877302	0.822576	0.855194	1.29268	0.000234608
B6TGT0	60S ribosomal protein L2	RPL8_0	60S ribosomal protein L2 OS=Zea mays OX=4577 GN=RPL8_0 PE=2 SV=1 - [B6TGT0_MAIZE]	54.79	1	12	77	261	28.2019	11.0776	1.26215	1.15259	1.2231	1.21262	0.92328	1.03197	0.862625	0.939293	1.29099	0.00979224
C0HI04	Uncharacterized protein		Uncharacterized protein OS=Zea mays OX=4577 PE=2 SV=1 - [C0HI04_MAIZE]	2.12	1	1	6	612	66.4331	6.17627	1.09686	1.09193	1.16841	1.11907	0.890389	0.846498	0.864481	0.867123	1.29055	0.000821872
A0A1D6NSE2	Triacylglycerol lipase-like 1	ZEAMMB73_Zm00001d044947	Triacylglycerol lipase-like 1 OS=Zea mays OX=4577 GN=ZEAMMB73_Zm00001d044947 PE=4 SV=1 - [A0A1D6NSE2_MAIZE]	3.7	2	2	4	487	53.9594	7.66455	1.18131	0.985971	1.22645	1.13124	0.908492	0.914412	0.808443	0.877116	1.28973	0.0354739
B6SIQ7	40S ribosomal protein S20		40S ribosomal protein S20 OS=Zea mays OX=4577 PE=2 SV=1 - [B6SIQ7_MAIZE]	38.89	4	5	21	126	13.8835	9.46631	1.10498	1.24924	1.1416	1.16527	0.933547	0.959292	0.819478	0.904106	1.28887	0.0128279
A0A096SFU6	Lysine--tRNA ligase	100273907	Lysine--tRNA ligase OS=Zea mays OX=4577 GN=100273907 PE=3 SV=1 - [A0A096SFU6_MAIZE]	12.23	4	8	21	605	68.5584	6.20166	1.07737	1.20736	1.18895	1.15789	0.907497	0.892657	0.898443	0.899532	1.28722	0.00319575
A0A1D6LA47	Mitochondrial import inner membrane translocase subunit Tim10	100285900	Mitochondrial import inner membrane translocase subunit Tim10 OS=Zea mays OX=4577 GN=100285900 PE=4 SV=1 - [A0A1D6LA47_MAIZE]	22.54	2	2	3	71	8.29679	5.43994		1.1671	1.21033	1.18872		0.96736	0.88207	0.924715	1.28549	0.0312678
A3FMA4	Bowman-Birk type trypsin inhibitor	100037814	Bowman-Birk type trypsin inhibitor OS=Zea mays OX=4577 GN=100037814 PE=2 SV=1 - [A3FMA4_MAIZE]	18	1	1	2	100	10.3988	6.44287	1.20311	1.15		1.17656	0.913107	0.917776		0.915442	1.28523	0.0102633
A0A1D6HSR3	Putative carboxylesterase 15	103631970	Putative carboxylesterase 15 OS=Zea mays OX=4577 GN=103631970 PE=4 SV=1 - [A0A1D6HSR3_MAIZE]	17.99	5	5	6	328	35.4049	6.18896	1.17913	1.03048	1.21471	1.14144	0.777645	0.952354	0.935476	0.888492	1.28469	0.033146
B4FS87	Glyceraldehyde-3-phosphate dehydrogenase	ZEAMMB73_Zm00001d035156	Glyceraldehyde-3-phosphate dehydrogenase OS=Zea mays OX=4577 GN=ZEAMMB73_Zm00001d035156 PE=2 SV=1 - [B4FS87_MAIZE]	48.96	5	18	140	337	36.5188	6.88818	1.03384	1.14074	1.16593	1.1135	0.81545	0.909191	0.876937	0.867193	1.28403	0.00732083
B4F925	Superoxide dismutase	542764	Superoxide dismutase OS=Zea mays OX=4577 GN=542764 PE=2 SV=1 - [B4F925_MAIZE]	33.19	1	6	31	235	25.5712	7.7085	1.34738	1.10824	1.10301	1.18621	0.878433	0.947034	0.948571	0.924679	1.28283	0.0355619
B6TYS6	Glutathione S-transferase zeta class		Glutathione S-transferase zeta class OS=Zea mays OX=4577 PE=2 SV=1 - [B6TYS6_MAIZE]	12.05	2	2	2	224	24.7397	6.11279	1.1329		1.15983	1.14637	0.916396		0.87268	0.894538	1.28152	0.0102322
B6UDP2	Signal peptidase complex subunit 3		Signal peptidase complex subunit 3 OS=Zea mays OX=4577 PE=2 SV=1 - [B6UDP2_MAIZE]	14.77	2	2	3	149	16.8684	9.02686	1.13198	1.18417		1.15808	0.905632	0.902587		0.90411	1.2809	0.010427
A0EJ90	COBRA-like protein	Bk2	COBRA-like protein OS=Zea mays OX=4577 GN=Bk2 PE=2 SV=1 - [A0EJ90_MAIZE]	2.22	1	1	3	450	49.2352	8.54346	1.18931	1.06054	1.16217	1.13734	0.846681	0.986975	0.836114	0.889923	1.27802	0.0166524
A0A1D6INM2	Exocyst complex component SEC8	ZEAMMB73_Zm00001d022502	Exocyst complex component SEC8 OS=Zea mays OX=4577 GN=ZEAMMB73_Zm00001d022502 PE=4 SV=1 - [A0A1D6INM2_MAIZE]	5.13	4	4	8	897	98.582	5.32568	1.20401	1.16639		1.1852	0.912992	0.944564		0.928778	1.27609	0.00904633
A0A1D6KJW0	Sulfite oxidase1	103642918	Sulfite oxidase1 OS=Zea mays OX=4577 GN=103642918 PE=4 SV=1 - [A0A1D6KJW0_MAIZE]	4.93	2	2	4	365	40.5418	8.26514	1.16165	1.21543	1.11419	1.16376	0.92591	0.848857	0.962318	0.912362	1.27554	0.00480754
A0A1D6HF06	Cationic amino acid transporter 9 chloroplastic	100285703	Cationic amino acid transporter 9 chloroplastic OS=Zea mays OX=4577 GN=100285703 PE=4 SV=1 - [A0A1D6HF06_MAIZE]	4.32	1	1	3	324	34.9726	8.93896	1.18212	1.10379	1.09235	1.12609	0.937717	0.855839	0.855787	0.883114	1.27513	0.00346436
B4G1P2	NADH dehydrogenase2	100285400	NADH dehydrogenase2 OS=Zea mays OX=4577 GN=100285400 PE=2 SV=1 - [B4G1P2_MAIZE]	13	3	3	8	200	21.927	9.37842	1.29694	1.07406	1.09498	1.15533	0.898012	0.902738	0.917902	0.906217	1.27489	0.0250532
A0A1D6N0A4	Pentatricopeptide repeat-containing protein chloroplastic	ZEAMMB73_Zm00001d041968	Pentatricopeptide repeat-containing protein chloroplastic OS=Zea mays OX=4577 GN=ZEAMMB73_Zm00001d041968 PE=4 SV=1 - [A0A1D6N0A4_MAIZE]	4.39	2	2	5	569	63.2517	7.44482	1.10515	1.22543	1.17623	1.16894	1.01703	0.884154	0.84958	0.916923	1.27485	0.0151562
A0A1D6H4X4	Uncharacterized protein	ZEAMMB73_Zm00001d015992	Uncharacterized protein OS=Zea mays OX=4577 GN=ZEAMMB73_Zm00001d015992 PE=3 SV=1 - [A0A1D6H4X4_MAIZE]	15.96	3	12	27	727	78.5614	9.12939	1.11579	1.17272	1.18548	1.15799	0.933627	0.86346	0.931991	0.909692	1.27295	0.00140373
A0A1D6L748	Aldehyde oxidase4	103644157	Aldehyde oxidase4 OS=Zea mays OX=4577 GN=103644157 PE=4 SV=1 - [A0A1D6L748_MAIZE]	9.65	8	13	26	1357	146.308	6.15088	1.14358	1.15607	1.11411	1.13792	0.960521	0.819705	0.903744	0.894656	1.27191	0.00471154
B6SQH6	Import inner membrane translocase subunit Tim8	100282244	Import inner membrane translocase subunit Tim8 OS=Zea mays OX=4577 GN=100282244 PE=2 SV=1 - [B6SQH6_MAIZE]	44.44	3	3	7	72	8.22881	7.75244	1.34799	1.14804	1.11276	1.20293	0.88981	0.966087	0.983232	0.946376	1.27109	0.0310472
A0A1D6HXF7	Dehydrogenase/reductase SDR family member 2	ZEAMMB73_Zm00001d019439	Dehydrogenase/reductase SDR family member 2 OS=Zea mays OX=4577 GN=ZEAMMB73_Zm00001d019439 PE=4 SV=1 - [A0A1D6HXF7_MAIZE]	28.06	6	6	20	253	26.7642	8.25049	1.20104	1.10472	1.14408	1.14995	0.88272	0.959054	0.874892	0.905555	1.26988	0.00323451
A0A1D6HWM7	Calreticulin	542732	Calreticulin OS=Zea mays OX=4577 GN=542732 PE=3 SV=1 - [A0A1D6HWM7_MAIZE]	23.06	8	8	38	360	41.0993	4.99561	1.09724	1.21991	1.11674	1.14463	0.956047	0.863747	0.887021	0.902271	1.26861	0.00675483
B4FCK9	60S ribosomal protein L22-2	100192778	60S ribosomal protein L22-2 OS=Zea mays OX=4577 GN=100192778 PE=2 SV=1 - [B4FCK9_MAIZE]	40	3	5	28	130	14.4937	9.5542	1.13692	1.19439	1.18435	1.17189	0.952768	0.950487	0.870778	0.924678	1.26734	0.00155885
C0HFM6	Chaperonin CPN60-like 2 mitochondrial	100272259	Chaperonin CPN60-like 2 mitochondrial OS=Zea mays OX=4577 GN=100272259 PE=2 SV=1 - [C0HFM6_MAIZE]	13.62	7	9	24	580	61.2263	6.7417	1.20304	1.07157	1.23409	1.16957	0.933304	0.94708	0.895607	0.92533	1.26395	0.00941301
B4FVM1	Uncharacterized protein		Uncharacterized protein OS=Zea mays OX=4577 PE=2 SV=1 - [B4FVM1_MAIZE]	4.86	2	2	5	453	48.9568	6.55127	1.18278	1.22853	1.08891	1.16674	0.912334	0.930154	0.928274	0.923588	1.26327	0.00422864
C0P455	60S ribosomal protein L4-1	100382075	60S ribosomal protein L4-1 OS=Zea mays OX=4577 GN=100382075 PE=2 SV=1 - [C0P455_MAIZE]	43.18	3	15	93	403	44.2649	10.6382	1.15933	1.09522	1.2251	1.15988	0.936129	1.01617	0.808529	0.920275	1.26037	0.0280976
P80607	Probable UDP-arabinopyranose mutase 1	UPTG	Probable UDP-arabinopyranose mutase 1 OS=Zea mays OX=4577 GN=UPTG PE=1 SV=2 - [RGP1_MAIZE]	37.64	6	12	54	364	41.1776	6.12549	1.21989	1.1422	1.11802	1.16003	0.921727	0.909485	0.932025	0.921079	1.25943	0.00160267
P17847	Ferredoxin--nitrite reductase, chloroplastic (Fragment)	NIR	Ferredoxin--nitrite reductase, chloroplastic (Fragment) OS=Zea mays OX=4577 GN=NIR PE=2 SV=1 - [NIR_MAIZE]	34.09	5	15	71	569	63.3016	6.43018	1.22188	1.10278	1.00725	1.11063	0.875087	0.864648	0.911108	0.883614	1.25692	0.0234516
B6TIC7	Cysteine protease5	100283433	Cysteine protease5 OS=Zea mays OX=4577 GN=100283433 PE=2 SV=1 - [B6TIC7_MAIZE]	17.51	5	6	13	377	41.1478	5.26221	1.26441	1.17581	1.1234	1.18788	0.89708	0.995826	0.945301	0.946069	1.25559	0.00845933
A0A1D6EWI1	ATP synthase3	ZEAMMB73_Zm00001d006439	ATP synthase3 OS=Zea mays OX=4577 GN=ZEAMMB73_Zm00001d006439 PE=3 SV=1 - [A0A1D6EWI1_MAIZE]	18.23	3	3	11	203	21.3333	6.39209	1.08151	1.16456	1.20949	1.15185	0.94169	0.984625	0.828425	0.918247	1.25441	0.0174436
A0A1D6MQL8	DNA topoisomerase 2	100382343	DNA topoisomerase 2 OS=Zea mays OX=4577 GN=100382343 PE=3 SV=1 - [A0A1D6MQL8_MAIZE]	3.02	1	1	2	431	46.7074	7.43018	1.11665	1.15689		1.13677	0.933979	0.878775		0.906377	1.25419	0.0212791
K7VM84	Folylpolyglutamate synthase	ZEAMMB73_Zm00001d048514	Folylpolyglutamate synthase OS=Zea mays OX=4577 GN=ZEAMMB73_Zm00001d048514 PE=3 SV=1 - [K7VM84_MAIZE]	9.34	5	5	13	578	63.5596	7.48877	1.22951	1.00328	1.17438	1.13572	0.895898	0.937061	0.884463	0.905807	1.25382	0.0303112
B6SLK4	Elongation factor 1-beta 2	ZEAMMB73_Zm00001d022513	Elongation factor 1-beta 2 OS=Zea mays OX=4577 GN=ZEAMMB73_Zm00001d022513 PE=2 SV=1 - [B6SLK4_MAIZE]	30.14	5	6	39	219	23.3927	4.71631	1.28066	1.04291	1.11139	1.14499	0.832047	0.973884	0.934062	0.913331	1.25364	0.0481163
B6UET4	Uncharacterized protein		Uncharacterized protein OS=Zea mays OX=4577 PE=2 SV=1 - [B6UET4_MAIZE]	15.04	2	2	5	113	11.8892	5.2876	1.16369	1.24449	1.12943	1.1792	0.966779	0.969878	0.886595	0.941084	1.25303	0.00549321
B4F8P0	Eukaryotic aspartyl protease family protein	100191400	Eukaryotic aspartyl protease family protein OS=Zea mays OX=4577 GN=100191400 PE=2 SV=1 - [B4F8P0_MAIZE]	8.67	4	4	6	450	46.6155	8.90967	1.14298	1.26987	1.1138	1.17555	1.00193	0.90578	0.907427	0.938379	1.25274	0.0145465
B4FBF4	Serine hydroxymethyltransferase		Serine hydroxymethyltransferase OS=Zea mays OX=4577 PE=2 SV=1 - [B4FBF4_MAIZE]	15.5	4	6	27	471	51.5711	7.26904	1.08844	1.11568	1.21223	1.13878	0.978762	0.949512	0.799294	0.909189	1.25253	0.0267264
A0A1D6E0R1	Clathrin interactor EPSIN 1	100501876	Clathrin interactor EPSIN 1 OS=Zea mays OX=4577 GN=100501876 PE=4 SV=1 - [A0A1D6E0R1_MAIZE]	3.73	2	2	3	536	56.2366	5.31299		1.23079	1.16191	1.19635		0.96219	0.949516	0.955853	1.25161	0.0205527
A0A1D6HFY2	Pentatricopeptide (PPR) repeat-containing protein-like	ZEAMMB73_Zm00001d017607	Pentatricopeptide (PPR) repeat-containing protein-like OS=Zea mays OX=4577 GN=ZEAMMB73_Zm00001d017607 PE=3 SV=1 - [A0A1D6HFY2_MAIZE]	4.36	2	2	2	413	47.567	8.01611	1.13259	1.15509		1.14384	0.940561	0.889052		0.914807	1.25036	0.0147263
B6T329	Endonuclease 2	100282067	Endonuclease 2 OS=Zea mays OX=4577 GN=100282067 PE=2 SV=1 - [B6T329_MAIZE]	29.21	7	8	18	291	32.2707	5.74463	1.10966	1.1785	1.06218	1.11678	0.886645	0.883698	0.911102	0.893815	1.24945	0.00307005
B4FQE6	Uncharacterized protein		Uncharacterized protein OS=Zea mays OX=4577 PE=2 SV=1 - [B4FQE6_MAIZE]	10.79	2	2	3	315	34.439	8.57275		1.12905	1.18576	1.1574		0.968692	0.884439	0.926565	1.24913	0.0451381
A0A1D6KTS5	Nucleolin 2	ZEAMMB73_Zm00001d032748	Nucleolin 2 OS=Zea mays OX=4577 GN=ZEAMMB73_Zm00001d032748 PE=4 SV=1 - [A0A1D6KTS5_MAIZE]	15.82	1	3	6	196	20.5379	9.72998	1.21388	1.17697	1.18036	1.1904	1.00637	0.996441	0.857662	0.95349	1.24847	0.00868963
A0A1D6KYH6	Serine/threonine protein phosphatase 2A 57 kDa regulatory subunit B' beta isoform	100280472	Serine/threonine protein phosphatase 2A 57 kDa regulatory subunit B' beta isoform OS=Zea mays OX=4577 GN=100280472 PE=4 SV=1 - [A0A1D6KYH6_MAIZE]	7.78	1	2	4	257	29.8795	7.23975	1.10339	1.16847	1.11372	1.12853	0.957248	0.905762	0.849561	0.90419	1.24811	0.00376485
B7ZZ42	Heat shock 70 kDa protein 3	103650526	Heat shock 70 kDa protein 3 OS=Zea mays OX=4577 GN=103650526 PE=2 SV=1 - [B7ZZ42_MAIZE]	41.91	8	22	198	649	71.1182	5.22412	1.1458	1.13736	1.10336	1.12884	0.929008	0.866799	0.919899	0.905235	1.24701	0.000662626
A0A1D6J5I4	Fatty acid biosynthesis1	100273168	Fatty acid biosynthesis1 OS=Zea mays OX=4577 GN=100273168 PE=4 SV=1 - [A0A1D6J5I4_MAIZE]	10.55	2	2	8	199	20.2075	9.29053	1.15517	1.18625	1.08284	1.14142	0.962249	0.894584	0.890267	0.9157	1.2465	0.00422224
Q53WW9	Beta-D-glucosidase	glu1	Beta-D-glucosidase OS=Zea mays OX=4577 GN=glu1 PE=2 SV=1 - [Q53WW9_MAIZE]	34.45	12	18	118	566	64.1965	6.69775	1.1963	1.14181	1.12987	1.15599	0.893731	0.944789	0.946691	0.928403	1.24514	0.00105611
A0A1D6G8L3	Triose phosphate isomerase5	100280823	Triose phosphate isomerase5 OS=Zea mays OX=4577 GN=100280823 PE=3 SV=1 - [A0A1D6G8L3_MAIZE]	33.04	6	6	22	230	24.6428	6.34131	1.26739	1.10528	1.11835	1.16367	0.837508	1.01228	0.959398	0.936395	1.24272	0.0362823
B6SLA5	2Fe-2S ferredoxin-like superfamily protein	100284188	2Fe-2S ferredoxin-like superfamily protein OS=Zea mays OX=4577 GN=100284188 PE=2 SV=1 - [B6SLA5_MAIZE]	16.98	3	3	7	159	17.1121	7.84033	1.12379	1.11905	1.13237	1.12507	0.90039	0.945614	0.871575	0.90586	1.24199	0.00055962
B4FR32	Glyceraldehyde-3-phosphate deHaseN1	542583	Glyceraldehyde-3-phosphate deHaseN1 OS=Zea mays OX=4577 GN=542583 PE=2 SV=1 - [B4FR32_MAIZE]	2.01	1	1	6	498	53.2505	7.1958	1.16828	1.12299	1.16123	1.15083	0.891126	0.957029	0.932685	0.926947	1.24153	0.000715771
A0A1D6F519	Ascorbate peroxidase2	542476	Ascorbate peroxidase2 OS=Zea mays OX=4577 GN=542476 PE=3 SV=1 - [A0A1D6F519_MAIZE]	29.24	4	6	31	236	25.766	5.35107	1.19105	1.19388	1.07863	1.15452	0.886404	0.896417	1.00736	0.93006	1.24134	0.014402
A0A1D6LMW9	Endoplasmin-like protein	ZEAMMB73_Zm00001d036401	Endoplasmin-like protein OS=Zea mays OX=4577 GN=ZEAMMB73_Zm00001d036401 PE=3 SV=1 - [A0A1D6LMW9_MAIZE]	23.13	1	17	61	804	92.515	5.03369	1.25431	1.01322	1.11872	1.12875	0.872299	0.96422	0.893055	0.909858	1.24058	0.0435127
A0A1X7YI05	Uncharacterized protein		Uncharacterized protein OS=Zea mays OX=4577 PE=4 SV=1 - [A0A1X7YI05_MAIZE]	10.14	2	2	2	207	23.7751	9.34912		1.09748	1.05071	1.07409		0.888379	0.844342	0.866361	1.23978	0.0230848
B4FHJ2	Xylose isomerase	100194128	Xylose isomerase OS=Zea mays OX=4577 GN=100194128 PE=2 SV=1 - [B4FHJ2_MAIZE]	20.87	4	7	14	484	53.9529	5.65576	1.26625	1.07731	1.05052	1.13136	0.864614	0.906914	0.968888	0.913472	1.23853	0.0427616
K7UGM3	Catalase	ZEAMMB73_Zm00001d054044	Catalase OS=Zea mays OX=4577 GN=ZEAMMB73_Zm00001d054044 PE=3 SV=1 - [K7UGM3_MAIZE]	7.69	3	4	11	494	56.5421	6.96143	1.06379	1.01308	1.2086	1.09516	0.871968	0.936067	0.847687	0.885241	1.23713	0.0308556
A0A1R3MB28	Malate dehydrogenase	MDHC_0	Malate dehydrogenase OS=Zea mays OX=4577 GN=MDHC_0 PE=3 SV=1 - [A0A1R3MB28_MAIZE]	37.65	11	11	62	332	35.5671	6.0874	1.10009	1.15067	1.17782	1.14286	0.97186	0.919605	0.881962	0.924476	1.23623	0.00322702
C4J9S6	Uncharacterized protein		Uncharacterized protein OS=Zea mays OX=4577 PE=2 SV=1 - [C4J9S6_MAIZE]	17.55	3	3	12	245	26.4252	5.78271	1.17957	1.00952	1.12086	1.10332	0.921982	0.924275	0.832824	0.893027	1.23548	0.0225566
B4FWP0	Fructose-bisphosphate aldolase	100272913	Fructose-bisphosphate aldolase OS=Zea mays OX=4577 GN=100272913 PE=2 SV=1 - [B4FWP0_MAIZE]	48.73	17	20	141	355	38.4349	7.29834	1.25978	1.07049	1.09905	1.14311	0.877602	0.964313	0.934501	0.925472	1.23516	0.0274948
A0A1D6JS29	Outer mitochondrial membrane protein porin	ZEAMMB73_Zm00001d028102	Outer mitochondrial membrane protein porin OS=Zea mays OX=4577 GN=ZEAMMB73_Zm00001d028102 PE=4 SV=1 - [A0A1D6JS29_MAIZE]	23.83	5	5	16	214	22.9583	9.36377	1.19818	1.21071	1.05729	1.15539	0.915819	0.879233	1.01133	0.93546	1.23511	0.025108
A0A1D6JI62	Stem-specific protein TSJT1	ZEAMMB73_Zm00001d026632	Stem-specific protein TSJT1 OS=Zea mays OX=4577 GN=ZEAMMB73_Zm00001d026632 PE=4 SV=1 - [A0A1D6JI62_MAIZE]	8.3	2	2	4	265	27.9137	7.69385	1.12969	1.06003		1.09486	0.884269	0.889265		0.886767	1.23466	0.027023
A0A1D6MED5	Structural maintenance of chromosomes protein 3	ZEAMMB73_Zm00001d039189	Structural maintenance of chromosomes protein 3 OS=Zea mays OX=4577 GN=ZEAMMB73_Zm00001d039189 PE=4 SV=1 - [A0A1D6MED5_MAIZE]	3.76	4	4	8	1090	125.522	7.6499	1.15634	1.136	1.08296	1.1251	0.965538	0.834952	0.934415	0.911635	1.23415	0.009045
C0PHP7	Uncharacterized protein		Uncharacterized protein OS=Zea mays OX=4577 PE=2 SV=1 - [C0PHP7_MAIZE]	1.91	1	1	3	471	48.3198	6.78564	1.18207	1.09507	1.1412	1.13945	0.909358	0.997978	0.863641	0.923659	1.23362	0.00991979
B6T3L4	Ribosomal protein L9, N-terminal domain containing protein		Ribosomal protein L9, N-terminal domain containing protein OS=Zea mays OX=4577 PE=2 SV=1 - [B6T3L4_MAIZE]	12.32	3	3	5	203	23.2847	9.94971	1.2148	1.16982	1.08579	1.1568	0.892716	0.958889	0.962276	0.93796	1.23332	0.00767283
A0A1D6HAH4	Phosphoinositide phosphatase SAC6	100501806	Phosphoinositide phosphatase SAC6 OS=Zea mays OX=4577 GN=100501806 PE=4 SV=1 - [A0A1D6HAH4_MAIZE]	23	3	11	23	474	54.4709	8.96826	1.0982	1.14048	1.10706	1.11525	0.933058	0.923577	0.857245	0.904627	1.23283	0.00147779
B6T6P7	UBA and UBX domain-containing protein		UBA and UBX domain-containing protein OS=Zea mays OX=4577 PE=2 SV=1 - [B6T6P7_MAIZE]	21.09	5	5	10	313	33.1984	5.93506	1.08739	1.20503	1.16272	1.15171	0.938901	0.942575	0.92378	0.935085	1.23167	0.00341994
B6TV55	Stem 28 kDa glycoprotein	100284565	Stem 28 kDa glycoprotein OS=Zea mays OX=4577 GN=100284565 PE=2 SV=1 - [B6TV55_MAIZE]	33.11	9	9	36	293	32.0697	9.12939	1.12104	1.19022	1.06265	1.12464	0.842546	0.933257	0.965532	0.913778	1.23075	0.0155162
B4FX42	Glycolipid transfer protein 1	100283524	Glycolipid transfer protein 1 OS=Zea mays OX=4577 GN=100283524 PE=2 SV=2 - [B4FX42_MAIZE]	8.42	1	2	4	202	22.5293	7.00537	1.24402	1.14802	1.09434	1.16213	0.897007	1.01785	0.920561	0.945141	1.22958	0.0193343
A0A317YC87	Uncharacterized protein	Zm00014a_041654	Uncharacterized protein OS=Zea mays OX=4577 GN=Zm00014a_041654 PE=4 SV=1 - [A0A317YC87_MAIZE]	5.61	1	1	14	196	17.1556	4.34814	1.20133	1.18557	1.07195	1.15295	0.916529	0.957254	0.942159	0.938647	1.22831	0.00724018
B4FT76	ABC transporter I family member 6 chloroplastic	100273146	ABC transporter I family member 6 chloroplastic OS=Zea mays OX=4577 GN=100273146 PE=2 SV=1 - [B4FT76_MAIZE]	3.63	1	1	2	303	32.3408	5.66846	1.19191	1.12692		1.15942	0.917324	0.972767		0.945045	1.22684	0.0374801
A0A1D6EY66	Elongation factor 1-alpha	ZEAMMB73_Zm00001d006596	Elongation factor 1-alpha OS=Zea mays OX=4577 GN=ZEAMMB73_Zm00001d006596 PE=3 SV=1 - [A0A1D6EY66_MAIZE]	19.69	2	10	124	447	49.2366	9.0708	1.20336	1.15727	1.17854	1.17972	0.998572	0.949412	0.938493	0.962159	1.22612	0.000670997
B4FYT3	Peptidyl-prolyl cis-trans isomerase		Peptidyl-prolyl cis-trans isomerase OS=Zea mays OX=4577 PE=2 SV=1 - [B4FYT3_MAIZE]	50.94	2	5	27	106	11.2776	5.89697	1.0806	1.20408	1.14463	1.1431	0.985194	0.927789	0.885089	0.93269	1.2256	0.0101966
A0A1D6G651	Stearoyl-acyl-carrier-protein desaturase2	100192652	Stearoyl-acyl-carrier-protein desaturase2 OS=Zea mays OX=4577 GN=100192652 PE=4 SV=1 - [A0A1D6G651_MAIZE]	11.14	2	4	9	332	38.048	5.61768	1.11361	1.11339		1.1135	0.942917	0.874548		0.908733	1.22533	0.0267571
A0A1D6QVG7	Protein disulfide isomerase3	606411	Protein disulfide isomerase3 OS=Zea mays OX=4577 GN=606411 PE=4 SV=1 - [A0A1D6QVG7_MAIZE]	6.49	2	3	7	462	50.9311	5.36377	1.22749	1.11945	1.07452	1.14049	0.93838	0.927609	0.928223	0.931404	1.22448	0.0100886
B4FDG9	Sucrose-phosphatase 1	541868	Sucrose-phosphatase 1 OS=Zea mays OX=4577 GN=541868 PE=2 SV=1 - [B4FDG9_MAIZE]	8.15	3	3	6	356	39.4661	6.20166	1.17805	1.11303	1.07839	1.12316	0.868976	0.926658	0.959007	0.918214	1.2232	0.00646563
B4FAF5	Outer envelope protein 80 chloroplastic	100191859	Outer envelope protein 80 chloroplastic OS=Zea mays OX=4577 GN=100191859 PE=2 SV=1 - [B4FAF5_MAIZE]	4.26	3	3	5	657	70.7352	8.17725	1.14168	1.16517	1.09588	1.13424	0.900821	0.912053	0.969777	0.927551	1.22284	0.00218391
C0PN73	Uncharacterized protein		Uncharacterized protein OS=Zea mays OX=4577 PE=2 SV=1 - [C0PN73_MAIZE]	12	1	1	4	75	8.15235	11.0337	1.21162	1.13179	1.1103	1.15123	0.903723	0.964164	0.956764	0.94155	1.2227	0.00442714
C0PFD1	1-(5-phosphoribosyl)-5-[(5-phosphoribosylamino)methylideneamino] imidazole-4-carboxamide isomerase, chloroplastic	ZEAMMB73_Zm00001d029548	1-(5-phosphoribosyl)-5-[(5-phosphoribosylamino)methylideneamino] imidazole-4-carboxamide isomerase, chloroplastic OS=Zea mays OX=4577 GN=ZEAMMB73_Zm00001d029548 PE=2 SV=1 - [C0PFD1_MAIZE]	5.45	2	2	2	312	34.0454	6.72705		1.13057	1.12041	1.12549		0.946835	0.898299	0.922567	1.21995	0.0146036
A0A1D6KJI4	Pyridoxamine 5'-phosphate oxidase family protein	100193760	Pyridoxamine 5'-phosphate oxidase family protein OS=Zea mays OX=4577 GN=100193760 PE=4 SV=1 - [A0A1D6KJI4_MAIZE]	4.42	2	2	2	362	39.1311	8.73389		1.15685	1.10208	1.12947		0.950176	0.904092	0.927134	1.21824	0.0298925
B8A1M2	Uncharacterized protein		Uncharacterized protein OS=Zea mays OX=4577 PE=2 SV=1 - [B8A1M2_MAIZE]	56.52	7	7	21	138	15.0636	5.22412	1.19606	1.06003	1.08856	1.11488	0.936697	0.925846	0.883131	0.915225	1.21815	0.0109556
A0A1D6LPA4	Glycosyltransferases	103629620	Glycosyltransferases OS=Zea mays OX=4577 GN=103629620 PE=3 SV=1 - [A0A1D6LPA4_MAIZE]	9.04	2	4	5	531	57.8075	8.20654	1.05825	1.12435		1.0913	0.901945	0.890265		0.896105	1.21783	0.028315
K7UC18	Ribosomal protein L19 family protein	100381882	Ribosomal protein L19 family protein OS=Zea mays OX=4577 GN=100381882 PE=4 SV=1 - [K7UC18_MAIZE]	11.11	1	1	3	81	9.51847	11.6343	1.16518	1.08577	1.15251	1.13449	0.9108	1.0122	0.872006	0.931668	1.21769	0.0139105
A0A317Y3E8	Alanine--glyoxylate aminotransferase 2 3, mitochondrial	At3g08860_2	Alanine--glyoxylate aminotransferase 2 3, mitochondrial OS=Zea mays OX=4577 GN=At3g08860_2 PE=3 SV=1 - [A0A317Y3E8_MAIZE]	15.57	3	6	10	469	50.8659	7.2251		1.09156	1.11204	1.1018		0.936995	0.874612	0.905804	1.21638	0.0269276
C4JBZ8	Uncharacterized protein		Uncharacterized protein OS=Zea mays OX=4577 PE=2 SV=1 - [C4JBZ8_MAIZE]	24.22	2	2	4	128	13.7977	4.88135	1.07892	1.20431	1.12346	1.13557	0.946457	0.950146	0.907881	0.934828	1.21473	0.00682478
B6T4W5	Hyoscyamine 6-dioxygenase		Hyoscyamine 6-dioxygenase OS=Zea mays OX=4577 PE=2 SV=1 - [B6T4W5_MAIZE]	5.85	2	2	7	342	37.7042	5.87158	1.023	1.03144	1.11725	1.05723	0.874407	0.922262	0.814613	0.870427	1.21461	0.0125204
B6TII5	Pyruvate kinase		Pyruvate kinase OS=Zea mays OX=4577 PE=2 SV=1 - [B6TII5_MAIZE]	22.22	3	11	25	513	55.281	8.06006	1.1352	1.0745	1.13536	1.11502	0.919526	1.00486	0.831978	0.91879	1.21358	0.0219061
A0A1D6E703	Eukaryotic translation initiation factor isoform 4G-2	103646262	Eukaryotic translation initiation factor isoform 4G-2 OS=Zea mays OX=4577 GN=103646262 PE=4 SV=1 - [A0A1D6E703_MAIZE]	14.76	6	12	31	786	86.4099	8.19189	1.05172	1.17408	1.13737	1.12106	0.981164	0.903799	0.892611	0.925858	1.21083	0.0129454
A0A1D6QGW9	Long chain acyl-CoA synthetase 8	ZEAMMB73_Zm00001d052399	Long chain acyl-CoA synthetase 8 OS=Zea mays OX=4577 GN=ZEAMMB73_Zm00001d052399 PE=4 SV=1 - [A0A1D6QGW9_MAIZE]	15.73	6	8	12	585	64.2305	6.90283	1.12278	1.08629		1.10453	0.919825	0.905518		0.912672	1.21022	0.0102745
C0P648	Uncharacterized protein		Uncharacterized protein OS=Zea mays OX=4577 PE=2 SV=1 - [C0P648_MAIZE]	3.39	1	1	2	295	32.3969	5.21143		1.16415	1.11764	1.14089		0.968764	0.917158	0.942961	1.20991	0.0294451
A0A1D6I0N4	Auxin transport protein BIG	ZEAMMB73_Zm00001d019881	Auxin transport protein BIG OS=Zea mays OX=4577 GN=ZEAMMB73_Zm00001d019881 PE=4 SV=1 - [A0A1D6I0N4_MAIZE]	1.48	7	7	19	4928	549.345	6.21436	1.15801	1.04538	1.13678	1.11339	0.986257	0.932175	0.842331	0.920254	1.20987	0.0237432
A0A1D6GLG4	Serine/threonine-protein phosphatase	ZEAMMB73_Zm00001d013680	Serine/threonine-protein phosphatase OS=Zea mays OX=4577 GN=ZEAMMB73_Zm00001d013680 PE=3 SV=1 - [A0A1D6GLG4_MAIZE]	2.33	1	2	10	944	99.8463	5.99854	1.12205	1.07253	1.06084	1.08514	0.898928	0.915729	0.87898	0.897879	1.20856	0.000967067
A0A1D6NUP0	Protein disulfide isomerase5	ZEAMMB73_Zm00001d045218	Protein disulfide isomerase5 OS=Zea mays OX=4577 GN=ZEAMMB73_Zm00001d045218 PE=4 SV=1 - [A0A1D6NUP0_MAIZE]	13.98	4	4	9	279	30.4517	5.12256	1.02361	1.20415	1.15036	1.12604	0.992755	0.914786	0.888364	0.931968	1.20824	0.0352052
A0A1D6L977	Methylenetetrahydrofolate reductase	541794	Methylenetetrahydrofolate reductase OS=Zea mays OX=4577 GN=541794 PE=3 SV=1 - [A0A1D6L977_MAIZE]	21.68	12	12	62	572	64.2444	6.01123	1.13215	1.0836	1.15	1.12192	0.977845	0.906559	0.902071	0.928825	1.20789	0.0036143
A0A1D6N521	Lipoxygenase	100037802	Lipoxygenase OS=Zea mays OX=4577 GN=100037802 PE=3 SV=1 - [A0A1D6N521_MAIZE]	36.05	20	27	129	871	98.2771	6.69775	1.0657	1.02465	1.12095	1.07044	0.937832	0.866841	0.856042	0.886905	1.20694	0.0083854
A0A1D6FLQ1	Putative casein kinase family protein	103635432	Putative casein kinase family protein OS=Zea mays OX=4577 GN=103635432 PE=4 SV=1 - [A0A1D6FLQ1_MAIZE]	11.38	3	3	5	369	42.1357	9.67139	1.09133	1.18385	1.09871	1.12463	0.926698	0.969239	0.908999	0.934978	1.20284	0.00542368
A0A1D6LGU3	IQ-domain 3	100274440	IQ-domain 3 OS=Zea mays OX=4577 GN=100274440 PE=4 SV=1 - [A0A1D6LGU3_MAIZE]	4.69	1	3	6	469	51.1235	10.3452	1.21686	1.20606	1.11253	1.17848	0.949964	1.0563	0.934596	0.980286	1.20218	0.0173019
A0A1D6P237	Plant L-ascorbate oxidase	100273169	Plant L-ascorbate oxidase OS=Zea mays OX=4577 GN=100273169 PE=3 SV=1 - [A0A1D6P237_MAIZE]	5.57	2	2	5	395	42.5585	7.35693	1.04386	1.16277	1.13476	1.1138	0.97115	0.971477	0.838413	0.927013	1.20149	0.0306162
B6U773	40S ribosomal protein S15a		40S ribosomal protein S15a OS=Zea mays OX=4577 PE=2 SV=1 - [B6U773_MAIZE]	9.3	1	1	2	129	14.942	10.1108	1.09879		1.06708	1.08294	0.932348		0.871699	0.902023	1.20057	0.0339646
B4G024	Malate dehydrogenase		Malate dehydrogenase OS=Zea mays OX=4577 PE=2 SV=1 - [B4G024_MAIZE]	6.32	2	2	6	348	36.4762	8.104	1.0151	1.13858	1.18946	1.11438	0.900699	0.918449	0.965633	0.92826	1.20051	0.0281168
B4FGP0	Uncharacterized protein		Uncharacterized protein OS=Zea mays OX=4577 PE=2 SV=1 - [B4FGP0_MAIZE]	9.19	2	2	2	283	30.2593	5.70654		0.92095	0.917528	0.919239		1.11641	1.08986	1.10313	0.833298	0.00525802
B4FR89	Phosphomannomutase	100272867	Phosphomannomutase OS=Zea mays OX=4577 GN=100272867 PE=2 SV=1 - [B4FR89_MAIZE]	21.69	5	5	15	249	28.1122	6.22705	0.936607	0.995757	0.799665	0.910676	1.03506	1.12194	1.1237	1.09357	0.832758	0.0481943
B7ZYR5	Uncharacterized protein		Uncharacterized protein OS=Zea mays OX=4577 PE=2 SV=1 - [B7ZYR5_MAIZE]	10.07	5	6	14	685	70.1987	7.75244	0.883959	0.926162	0.834218	0.881446	1.08648	1.05862	1.03145	1.05885	0.832458	0.00459259
A0A1D6EPK9	Annexin	100283225	Annexin OS=Zea mays OX=4577 GN=100283225 PE=3 SV=1 - [A0A1D6EPK9_MAIZE]	6.38	1	2	6	298	33.9305	8.89502	0.863357	0.844839	0.850988	0.853061	1.03675	1.00831	1.02954	1.02487	0.832363	7.07271e-05
B6TK02	Expp1 protein	100283623	Expp1 protein OS=Zea mays OX=4577 GN=100283623 PE=2 SV=1 - [B6TK02_MAIZE]	4.1	1	1	4	244	25.7206	7.88428	0.86648	0.850171	0.835823	0.850824	1.03265	1.00033	1.03525	1.02274	0.831907	0.000274641
B6UAL5	Cytokinin riboside 5'-monophosphate phosphoribohydrolase		Cytokinin riboside 5'-monophosphate phosphoribohydrolase OS=Zea mays OX=4577 PE=2 SV=1 - [B6UAL5_MAIZE]	16.81	3	3	8	232	24.5242	5.41455	0.915891	0.81762	0.979493	0.904335	1.03731	1.17277	1.05197	1.08735	0.831688	0.0453485
B4FN21	Proteasome subunit beta	100283981	Proteasome subunit beta OS=Zea mays OX=4577 GN=100283981 PE=2 SV=1 - [B4FN21_MAIZE]	22.43	4	4	12	263	28.8494	7.98682	0.773039	0.940164	0.944968	0.886057	1.08566	1.08821	1.02231	1.06539	0.831672	0.0413728
B6T9E6	Polygalacturonase		Polygalacturonase OS=Zea mays OX=4577 PE=2 SV=1 - [B6T9E6_MAIZE]	1.97	1	1	3	458	48.9954	5.68115	0.890448	0.909679	0.859295	0.886474	1.05614	1.05004	1.09239	1.06619	0.831441	0.000809336
A0A1D6F267	Peroxidase	103647881	Peroxidase OS=Zea mays OX=4577 GN=103647881 PE=3 SV=1 - [A0A1D6F267_MAIZE]	14.48	4	5	14	373	40.3851	7.76709	0.796123	0.919424	0.928919	0.881489	1.00507	1.07974	1.09874	1.06118	0.830665	0.0250577
A0A1D6H7X5	PREFOLDIN 1	ZEAMMB73_Zm00001d016458	PREFOLDIN 1 OS=Zea mays OX=4577 GN=ZEAMMB73_Zm00001d016458 PE=4 SV=1 - [A0A1D6H7X5_MAIZE]	35.66	5	5	16	129	14.8625	5.05908	0.868872	0.879788	0.95656	0.90174	1.0078	1.20547	1.05028	1.08785	0.828919	0.0480573
A0A1D6NDZ5	Putative choline kinase 2	ZEAMMB73_Zm00001d043652	Putative choline kinase 2 OS=Zea mays OX=4577 GN=ZEAMMB73_Zm00001d043652 PE=4 SV=1 - [A0A1D6NDZ5_MAIZE]	3.19	1	1	3	251	29.1633	5.21143	0.92976	0.866649	0.884157	0.893522	1.04985	1.0688	1.11568	1.07811	0.828784	0.00244172
B4FCQ4	Cytochrome c oxidase subunit 6b-1	ZEAMMB73_Zm00001d029393	Cytochrome c oxidase subunit 6b-1 OS=Zea mays OX=4577 GN=ZEAMMB73_Zm00001d029393 PE=2 SV=1 - [B4FCQ4_MAIZE]	20.93	1	4	8	172	19.0057	4.29736	0.866552	0.841283	0.898396	0.868744	1.07576	1.08726	0.983328	1.04878	0.828336	0.00809713
A0A1D6HBS0	Ras-related protein RABB1a	100217047	Ras-related protein RABB1a OS=Zea mays OX=4577 GN=100217047 PE=4 SV=1 - [A0A1D6HBS0_MAIZE]	28.99	3	3	15	138	15.7119	6.94678	0.83099	0.976241	0.821147	0.876126	1.07712	0.999119	1.09774	1.05799	0.828102	0.0358103
B6TQC0	3-N-debenzoyl-2-deoxytaxol N-benzoyltransferase	100284134	3-N-debenzoyl-2-deoxytaxol N-benzoyltransferase OS=Zea mays OX=4577 GN=100284134 PE=2 SV=1 - [B6TQC0_MAIZE]	25.23	5	10	31	428	46.0705	5.24951	0.880701	0.900475	0.870113	0.883763	0.977508	1.05308	1.17183	1.06747	0.827903	0.0326253
B6TG90	Methionine aminopeptidase		Methionine aminopeptidase OS=Zea mays OX=4577 PE=2 SV=1 - [B6TG90_MAIZE]	9.23	1	4	18	390	43.4799	7.53271		0.954336	0.900512	0.927424		1.14006	1.10569	1.12287	0.825937	0.0256682
B4FUI0	Uncharacterized protein		Uncharacterized protein OS=Zea mays OX=4577 PE=2 SV=1 - [B4FUI0_MAIZE]	19.16	8	8	26	407	44.4819	8.99756	0.86105	0.90144	0.847698	0.870063	1.07659	0.992232	1.09176	1.05353	0.825857	0.00628102
B4F935	Uncharacterized protein		Uncharacterized protein OS=Zea mays OX=4577 PE=2 SV=1 - [B4F935_MAIZE]	9.56	4	4	13	481	52.2485	7.04932	0.901677	0.905893	0.87646	0.894677	1.07299	1.02064	1.16403	1.08589	0.823914	0.0111751
A0A1D6DTL5	Putative acyl-activating enzyme 5 peroxisomal	103645766	Putative acyl-activating enzyme 5 peroxisomal OS=Zea mays OX=4577 GN=103645766 PE=4 SV=1 - [A0A1D6DTL5_MAIZE]	2.34	1	1	2	556	60.0904	7.34229	0.907089	0.864926		0.886008	1.06666	1.08429		1.07547	0.82383	0.0142351
C4IYE9	Uncharacterized protein		Uncharacterized protein OS=Zea mays OX=4577 PE=2 SV=1 - [C4IYE9_MAIZE]	3.59	1	1	3	223	24.4893	8.01611	0.821845	0.892754	0.901581	0.87206	1.086	1.06481	1.02953	1.06011	0.822613	0.00336083
A0A1D6PT07	DNA replication licensing factor MCM2	ZEAMMB73_Zm00001d049190	DNA replication licensing factor MCM2 OS=Zea mays OX=4577 GN=ZEAMMB73_Zm00001d049190 PE=3 SV=1 - [A0A1D6PT07_MAIZE]	8.13	5	5	7	652	73.358	7.57666	0.955307	0.861829	0.799912	0.872349	1.03574	1.02447	1.1264	1.0622	0.821265	0.0267705
A0A1D6III9	NAD(P)-binding Rossmann-fold superfamily protein	ZEAMMB73_Zm00001d022009	NAD(P)-binding Rossmann-fold superfamily protein OS=Zea mays OX=4577 GN=ZEAMMB73_Zm00001d022009 PE=4 SV=1 - [A0A1D6III9_MAIZE]	24.76	7	7	23	307	31.1354	9.34912	0.980024	0.909871	0.862772	0.917555	1.045	1.09382	1.21408	1.11763	0.820982	0.0300442
A0A1D6GEN7	NAD(P)-binding Rossmann-fold superfamily protein	100280114	NAD(P)-binding Rossmann-fold superfamily protein OS=Zea mays OX=4577 GN=100280114 PE=4 SV=1 - [A0A1D6GEN7_MAIZE]	3.08	1	1	2	260	28.4104	7.63525	0.838551		0.902612	0.870582	1.0845		1.03797	1.06124	0.820345	0.0405122
A0A1D6LEU8	Pre-mRNA-splicing factor SLU7-A	103629005	Pre-mRNA-splicing factor SLU7-A OS=Zea mays OX=4577 GN=103629005 PE=4 SV=1 - [A0A1D6LEU8_MAIZE]	5.45	1	1	3	202	23.3792	6.78564	0.971109	1.00777	0.861587	0.946821	1.06463	1.19229	1.20625	1.15439	0.820191	0.0299572
A0A1D6N2E5	Retrovirus-related Pol polyprotein LINE-1	100192760	Retrovirus-related Pol polyprotein LINE-1 OS=Zea mays OX=4577 GN=100192760 PE=4 SV=1 - [A0A1D6N2E5_MAIZE]	2.33	1	1	2	558	60.6538	6.07471	0.882407	0.913932		0.89817	1.09548	1.09491		1.09519	0.820101	0.00634158
B4FLD5	Uncharacterized protein		Uncharacterized protein OS=Zea mays OX=4577 PE=2 SV=1 - [B4FLD5_MAIZE]	2.57	1	1	5	389	43.3027	5.96045	0.931984	0.853727	0.878078	0.88793	1.02238	1.11344	1.11362	1.08314	0.819771	0.00692056
B6T7H0	Glutathione S-transferase 6	GSTF8_3	Glutathione S-transferase 6 OS=Zea mays OX=4577 GN=GSTF8_3 PE=2 SV=1 - [B6T7H0_MAIZE]	17.26	3	3	32	226	25.7703	7.56201	0.919962	0.82385	0.884276	0.876029	0.982258	1.12334	1.10204	1.06921	0.81932	0.0206976
A0A1D6KYW8	Deoxyuridine 5'-triphosphate nucleotidohydrolase	ZEAMMB73_Zm00001d033421	Deoxyuridine 5'-triphosphate nucleotidohydrolase OS=Zea mays OX=4577 GN=ZEAMMB73_Zm00001d033421 PE=4 SV=1 - [A0A1D6KYW8_MAIZE]	28.83	4	4	9	222	22.9202	7.04932	0.823328	0.854302	0.896632	0.858087	1.05893	1.10531	0.98354	1.04926	0.817804	0.00986228
A0A1D6QGA0	Meristematic receptor-like kinase	100281413	Meristematic receptor-like kinase OS=Zea mays OX=4577 GN=100281413 PE=4 SV=1 - [A0A1D6QGA0_MAIZE]	5.02	3	3	5	638	67.1094	9.59814	0.87399	0.922963		0.898476	1.10884	1.08885		1.09885	0.817655	0.01698
A0A1D6MC44	ARM repeat superfamily protein	ZEAMMB73_Zm00001d038970	ARM repeat superfamily protein OS=Zea mays OX=4577 GN=ZEAMMB73_Zm00001d038970 PE=4 SV=1 - [A0A1D6MC44_MAIZE]	6.3	2	2	4	524	57.134	5.89697	0.873061	0.86189	0.952687	0.895879	1.07606	1.13056	1.08172	1.09611	0.817324	0.00390092
A0A1D6GMZ8	SH3 domain-containing protein 2	100272839	SH3 domain-containing protein 2 OS=Zea mays OX=4577 GN=100272839 PE=4 SV=1 - [A0A1D6GMZ8_MAIZE]	11.85	3	4	7	346	38.5155	6.30322	0.813514	0.904877	0.910226	0.876205	1.0921	1.10909	1.01551	1.07223	0.817178	0.0100055
B4FWY4	GDSL esterase/lipase	100273681	GDSL esterase/lipase OS=Zea mays OX=4577 GN=100273681 PE=2 SV=1 - [B4FWY4_MAIZE]	10.05	4	6	14	378	41.176	8.27979	0.812835	0.930894	0.944459	0.896062	1.15227	1.08574	1.05317	1.09706	0.816784	0.016905
B6T4T1	Peroxisome biogenesis protein 22	100276098	Peroxisome biogenesis protein 22 OS=Zea mays OX=4577 GN=100276098 PE=2 SV=1 - [B6T4T1_MAIZE]	14.98	3	3	4	287	31.7285	7.47412	0.855248	0.825643	0.906797	0.862563	1.02251	1.05594	1.09056	1.05633	0.816562	0.00325778
B6TME5	Aminotransferase, class IV family protein		Aminotransferase, class IV family protein OS=Zea mays OX=4577 PE=2 SV=1 - [B6TME5_MAIZE]	4.83	2	2	4	559	62.2692	6.85889	0.771126	0.944644	0.868321	0.861363	1.10749	1.01357	1.04497	1.05534	0.816192	0.0276463
A0A1D6IKI4	VH1-interacting kinase	100382164	VH1-interacting kinase OS=Zea mays OX=4577 GN=100382164 PE=3 SV=1 - [A0A1D6IKI4_MAIZE]	10.23	4	4	6	440	49.0743	7.23975	0.908728	0.85401	0.927915	0.896884	1.03006	1.06783	1.19899	1.09896	0.81612	0.0222934
B4FC92	Nuclear transport factor 2	100192679	Nuclear transport factor 2 OS=Zea mays OX=4577 GN=100192679 PE=2 SV=1 - [B4FC92_MAIZE]	21.77	3	3	10	124	13.5566	6.12549	0.897442	0.84603	0.883384	0.875619	1.03078	1.09744	1.09388	1.07403	0.815262	0.00171041
A0A1D6LHU9	Pumilio homolog 3	100384506	Pumilio homolog 3 OS=Zea mays OX=4577 GN=100384506 PE=4 SV=1 - [A0A1D6LHU9_MAIZE]	4.74	1	1	2	232	26.2893	6.82959	0.919126	0.888002		0.903564	1.09319	1.1255		1.10934	0.814503	0.0116746
B7ZZ09	Uncharacterized protein		Uncharacterized protein OS=Zea mays OX=4577 PE=2 SV=1 - [B7ZZ09_MAIZE]	8.38	1	1	2	191	21.1004	11.2095		0.894222	0.9405	0.917361		1.11174	1.1412	1.12647	0.814365	0.0167735
A0A1D6PYJ2	Thiaminase1	103653246	Thiaminase1 OS=Zea mays OX=4577 GN=103653246 PE=4 SV=1 - [A0A1D6PYJ2_MAIZE]	5.38	2	2	4	372	41.6112	4.95752	0.900988	0.830112	0.938583	0.889894	1.07669	1.17323	1.02881	1.09291	0.814242	0.0186767
B8A2X5	Pectinesterase	100280285	Pectinesterase OS=Zea mays OX=4577 GN=100280285 PE=2 SV=1 - [B8A2X5_MAIZE]	7.64	4	4	6	563	60.0563	8.54346	0.770912	0.996369	0.837961	0.868414	1.07364	1.03966	1.08676	1.06668	0.814126	0.0439871
B4FW32	DnaJ subfamily C member 7	ZEAMMB73_Zm00001d011767	DnaJ subfamily C member 7 OS=Zea mays OX=4577 GN=ZEAMMB73_Zm00001d011767 PE=2 SV=1 - [B4FW32_MAIZE]	5.72	2	3	7	472	52.545	7.81104	0.832179	0.850351	0.884595	0.855708	1.07136	1.10455	0.9854	1.05377	0.812045	0.00688714
A0A1D6MDW9	26S proteasome regulatory subunit RPN13	100281651	26S proteasome regulatory subunit RPN13 OS=Zea mays OX=4577 GN=100281651 PE=4 SV=1 - [A0A1D6MDW9_MAIZE]	11.04	3	3	6	299	32.5881	4.4751	0.872507	0.776315	0.928991	0.859271	1.03413	1.11822	1.02891	1.06042	0.810311	0.0193465
B6SHU5	Fasciclin-like arabinogalactan protein 7	100281475	Fasciclin-like arabinogalactan protein 7 OS=Zea mays OX=4577 GN=100281475 PE=2 SV=1 - [B6SHU5_MAIZE]	6.32	2	2	10	269	28.1789	9.30518	0.926582	0.938265	0.879736	0.914861	1.06532	1.20171	1.12185	1.12963	0.80988	0.00778128
B6T7N8	ATP10 protein expressed	100282465	ATP10 protein expressed OS=Zea mays OX=4577 GN=100282465 PE=2 SV=1 - [B6T7N8_MAIZE]	3.83	1	1	2	261	28.948	8.89502	0.863193		0.78255	0.822871	1.00874		1.02426	1.0165	0.809514	0.0421464
A0A1D6HK91	Protein tyrosine kinase family protein	ZEAMMB73_Zm00001d018025	Protein tyrosine kinase family protein OS=Zea mays OX=4577 GN=ZEAMMB73_Zm00001d018025 PE=4 SV=1 - [A0A1D6HK91_MAIZE]	2.54	2	2	3	984	110.016	6.06201	0.874173	0.907802		0.890987	1.0976	1.10405		1.10082	0.809382	0.00659122
B4FE06	Uncharacterized protein		Uncharacterized protein OS=Zea mays OX=4577 PE=2 SV=1 - [B4FE06_MAIZE]	38.43	3	8	45	216	24.0342	6.01123	0.872571	0.859896	0.930193	0.887554	1.06993	1.19227	1.02778	1.09666	0.809323	0.0178057
B6TTW1	Cyanate hydratase	CYN	Cyanate hydratase OS=Zea mays OX=4577 GN=CYN PE=2 SV=1 - [CYNS_MAIZE]	8.43	1	1	2	166	18.5144	5.87158		0.818918	0.913744	0.866331		1.07204	1.06886	1.07045	0.809315	0.0499981
B6TLX2	Fiber protein Fb15	100283793	Fiber protein Fb15 OS=Zea mays OX=4577 GN=100283793 PE=2 SV=1 - [B6TLX2_MAIZE]	38.46	4	4	23	91	10.6474	8.1626	0.87787	0.89787	0.847387	0.874376	1.04683	1.08182	1.11415	1.08093	0.808909	0.00106023
A0A1D6Q5M4	Proteasome endopeptidase complex	103653823	Proteasome endopeptidase complex OS=Zea mays OX=4577 GN=103653823 PE=3 SV=1 - [A0A1D6Q5M4_MAIZE]	38.85	5	5	24	157	17.836	5.38916	0.893425	0.874342	0.895794	0.887854	1.04767	1.17773	1.07094	1.09878	0.808036	0.00654525
A0A1D6FNP0	Lysophospholipid acyltransferase LPEAT1	ZEAMMB73_Zm00001d010026	Lysophospholipid acyltransferase LPEAT1 OS=Zea mays OX=4577 GN=ZEAMMB73_Zm00001d010026 PE=4 SV=1 - [A0A1D6FNP0_MAIZE]	4.09	2	2	5	391	42.8529	7.69385	0.843026	0.936234	0.853946	0.877735	1.08063	1.05029	1.12794	1.08629	0.808014	0.00492043
A0A1D6MPT4	H/ACA ribonucleoprotein complex subunit 4	103649956	H/ACA ribonucleoprotein complex subunit 4 OS=Zea mays OX=4577 GN=103649956 PE=4 SV=1 - [A0A1D6MPT4_MAIZE]	6.91	5	5	16	579	63.7606	9.11475	0.81426	0.889664	0.871823	0.858582	1.02161	1.0823	1.08964	1.06452	0.806546	0.00277627
C0P9T2	SEC12-like protein 1	100382688	SEC12-like protein 1 OS=Zea mays OX=4577 GN=100382688 PE=2 SV=1 - [C0P9T2_MAIZE]	13.1	5	5	21	397	43.2831	7.18115	0.859889	0.915332	0.910204	0.895142	1.06917	1.05727	1.20418	1.11021	0.806282	0.0129125
B4FS82	Uncharacterized protein		Uncharacterized protein OS=Zea mays OX=4577 PE=2 SV=1 - [B4FS82_MAIZE]	4.55	1	1	2	198	20.1931	8.1333	0.888543	0.899091		0.893817	1.06044	1.15746		1.10895	0.806001	0.0477851
B6TXM6	10-deacetylbaccatin III 10-O-acetyltransferase	100284805	10-deacetylbaccatin III 10-O-acetyltransferase OS=Zea mays OX=4577 GN=100284805 PE=2 SV=1 - [B6TXM6_MAIZE]	20.56	5	7	31	428	45.4552	5.18604	0.845764	0.872143	0.9072	0.875035	1.11941	1.06084	1.08607	1.08877	0.803689	0.000963202
B4FPX0	26S proteasome non-ATPase regulatory subunit 9		26S proteasome non-ATPase regulatory subunit 9 OS=Zea mays OX=4577 PE=2 SV=1 - [B4FPX0_MAIZE]	17.84	3	3	4	213	23.1377	5.22412	0.947527	0.940451	0.942159	0.943379	1.02505	1.20572	1.29277	1.17452	0.803207	0.0427909
B4FKQ7	UDP-galactose/UDP-glucose transporter 3	100216965	UDP-galactose/UDP-glucose transporter 3 OS=Zea mays OX=4577 GN=100216965 PE=2 SV=1 - [B4FKQ7_MAIZE]	2.77	1	1	2	361	39.9567	9.80322	0.804581		0.897961	0.851271	1.0625		1.05853	1.06052	0.802695	0.0464324
B6SMV8	Uncharacterized protein	100276306	Uncharacterized protein OS=Zea mays OX=4577 GN=100276306 PE=2 SV=1 - [B6SMV8_MAIZE]	18.27	2	2	7	104	10.7854	8.51416	0.839623	0.902712	0.96096	0.901098	1.13049	1.17174	1.06663	1.12295	0.802436	0.00883357
A0A1D6F513	Phosphoinositide phospholipase C	ZEAMMB73_Zm00001d007229	Phosphoinositide phospholipase C OS=Zea mays OX=4577 GN=ZEAMMB73_Zm00001d007229 PE=4 SV=1 - [A0A1D6F513_MAIZE]	6.81	3	4	11	587	66.9321	6.94678	0.884823	0.893561	0.885478	0.887954	1.09896	1.08587	1.13957	1.10813	0.801307	0.000178393
A0A1D6M4H7	Guanosine nucleotide diphosphate dissociation inhibitor	103630368	Guanosine nucleotide diphosphate dissociation inhibitor OS=Zea mays OX=4577 GN=103630368 PE=3 SV=1 - [A0A1D6M4H7_MAIZE]	30.84	2	11	39	415	46.7765	6.80029	0.870931	0.886908	0.919477	0.892439	1.11634	1.15513	1.07133	1.11427	0.800921	0.00139497
B4FVN5	Uncharacterized protein		Uncharacterized protein OS=Zea mays OX=4577 PE=2 SV=1 - [B4FVN5_MAIZE]	16.76	6	6	32	358	37.2549	6.59521	0.785657	0.926276	0.891672	0.867868	1.1414	1.07923	1.0305	1.08371	0.800831	0.0152853
C4J6T2	Exocyst subunit Exo70 family protein		Exocyst subunit Exo70 family protein OS=Zea mays OX=4577 PE=2 SV=1 - [C4J6T2_MAIZE]	5.71	3	3	5	631	71.0984	7.6792	0.863372	0.885146	0.864618	0.871045	1.0885	1.07817	1.09643	1.0877	0.800813	1.62974e-05
C4P9N2	Nucleoside diphosphate kinase II (Fragment)		Nucleoside diphosphate kinase II (Fragment) OS=Zea mays OX=4577 PE=2 SV=1 - [C4P9N2_MAIZE]	30.09	3	3	6	113	12.3876	9.1001	0.972388	0.832231	0.797007	0.867208	1.01647	1.08717	1.14689	1.08351	0.800372	0.0298658
B6SPZ8	VAMP-like protein YKT62		VAMP-like protein YKT62 OS=Zea mays OX=4577 PE=2 SV=1 - [B6SPZ8_MAIZE]	2.86	1	1	3	210	23.1767	7.91357	0.874506	0.906296	0.870749	0.883851	1.09306	1.18186	1.03847	1.10446	0.800255	0.00699488
C4J4E4	Monodehydroascorbate reductase homolog1	100501585	Monodehydroascorbate reductase homolog1 OS=Zea mays OX=4577 GN=100501585 PE=2 SV=1 - [C4J4E4_MAIZE]	19.77	7	8	25	435	46.7033	5.59229	0.817872	0.83746	0.929883	0.861739	1.07186	1.11793	1.04344	1.07774	0.799576	0.00610619
A0A317YDA9	Uncharacterized protein	Zm00014a_005978	Uncharacterized protein OS=Zea mays OX=4577 GN=Zm00014a_005978 PE=4 SV=1 - [A0A317YDA9_MAIZE]	14.01	2	2	10	157	16.4352	4.55127	0.875826		0.863794	0.86981	1.0795		1.09811	1.0888	0.798868	0.00255117
B4G038	Homoserine dehydrogenase	100282632	Homoserine dehydrogenase OS=Zea mays OX=4577 GN=100282632 PE=2 SV=1 - [B4G038_MAIZE]	8.07	3	3	8	384	40.5681	6.18896	0.85143	0.805858	0.902227	0.853171	1.05157	1.17706	0.977258	1.06863	0.79838	0.0289753
A0A1D6MCF3	Golgin candidate 5	ZEAMMB73_Zm00001d038982	Golgin candidate 5 OS=Zea mays OX=4577 GN=ZEAMMB73_Zm00001d038982 PE=4 SV=1 - [A0A1D6MCF3_MAIZE]	6.76	4	4	6	680	77.5746	5.04639	0.83189	0.94168	0.861454	0.878341	1.07527	1.08575	1.13986	1.1003	0.798277	0.0044599
B4G191	Uncharacterized protein		Uncharacterized protein OS=Zea mays OX=4577 PE=2 SV=1 - [B4G191_MAIZE]	14.29	6	6	12	476	50.4931	6.03662	0.745953	0.930079	0.958558	0.878197	1.13609	1.13307	1.03262	1.10059	0.79793	0.041018
K7U9N2	Putative subtilase family protein	103654203	Putative subtilase family protein OS=Zea mays OX=4577 GN=103654203 PE=4 SV=1 - [K7U9N2_MAIZE]	20.38	12	12	67	780	79.9367	8.51416	0.935999	0.895844	0.805926	0.879256	1.03334	1.10519	1.16787	1.10213	0.797776	0.0151418
K7TFA7	Putative oxidoreductase, aldo/keto reductase family protein	ZEAMMB73_Zm00001d023652	Putative oxidoreductase, aldo/keto reductase family protein OS=Zea mays OX=4577 GN=ZEAMMB73_Zm00001d023652 PE=4 SV=1 - [K7TFA7_MAIZE]	5.99	2	2	3	317	34.3636	5.42725	0.832416		0.846582	0.839499	1.0082		1.10036	1.05428	0.796278	0.0440293
A0A1D6JVP9	Subtilisin-like protease SBT1.6	ZEAMMB73_Zm00001d028391	Subtilisin-like protease SBT1.6 OS=Zea mays OX=4577 GN=ZEAMMB73_Zm00001d028391 PE=4 SV=1 - [A0A1D6JVP9_MAIZE]	5.42	3	3	6	794	81.149	8.03076	0.95411	0.80377	0.842261	0.866714	1.06065	1.06038	1.14715	1.08939	0.795592	0.014158
A0A1D6LJU9	Plant/F18O14-17 protein	103629390	Plant/F18O14-17 protein OS=Zea mays OX=4577 GN=103629390 PE=4 SV=1 - [A0A1D6LJU9_MAIZE]	6	4	4	7	633	67.4709	8.26514	0.891008	0.81032	0.866633	0.855987	1.06415	1.14057	1.02345	1.07606	0.795486	0.0062482
B6TT00	Endochitinase PR4	100284387	Endochitinase PR4 OS=Zea mays OX=4577 GN=100284387 PE=2 SV=1 - [B6TT00_MAIZE]	2.95	1	1	2	271	28.5454	5.35107		0.915462	0.889842	0.902652		1.16959	1.09986	1.13472	0.795483	0.0246755
A0A1D6H552	Uncharacterized protein	100217299	Uncharacterized protein OS=Zea mays OX=4577 GN=100217299 PE=4 SV=1 - [A0A1D6H552_MAIZE]	16.56	2	2	2	157	17.323	10.7407	0.905237	0.854896		0.880066	1.12821	1.08488		1.10655	0.795327	0.0208312
C0PIK1	Uncharacterized protein		Uncharacterized protein OS=Zea mays OX=4577 PE=2 SV=1 - [C0PIK1_MAIZE]	4.25	1	1	2	212	23.2448	8.95361		0.839084	0.884804	0.861944		1.0754	1.09352	1.08446	0.794815	0.0119929
A0A1D6NE88	WD-repeat protein RBAP2	542087	WD-repeat protein RBAP2 OS=Zea mays OX=4577 GN=542087 PE=4 SV=1 - [A0A1D6NE88_MAIZE]	13.06	1	4	15	360	40.2161	6.63916	0.837585	0.856014	0.905844	0.866481	1.08572	1.04354	1.14169	1.09032	0.794707	0.00306309
B4F9J1	Beta-galactosidase	100191631	Beta-galactosidase OS=Zea mays OX=4577 GN=100191631 PE=2 SV=1 - [B4F9J1_MAIZE]	11.36	6	6	12	722	78.6385	7.97217	0.831409	0.885787	0.870179	0.862458	1.03015	1.10989	1.11618	1.0854	0.794597	0.00224729
A0A1D6Q3E2	2-hydroxy-3-oxopropionate reductase	ZEAMMB73_Zm00001d050810	2-hydroxy-3-oxopropionate reductase OS=Zea mays OX=4577 GN=ZEAMMB73_Zm00001d050810 PE=4 SV=1 - [A0A1D6Q3E2_MAIZE]	4.29	1	1	3	233	24.0202	5.43994	0.866406	0.808528	0.978013	0.884316	1.07393	1.17882	1.08651	1.11309	0.794473	0.0186142
B4FKF8	Cytochrome P450 CYP51H12	ZEAMMB73_Zm00001d044120	Cytochrome P450 CYP51H12 OS=Zea mays OX=4577 GN=ZEAMMB73_Zm00001d044120 PE=2 SV=1 - [B4FKF8_MAIZE]	2.23	1	1	3	494	55.444	8.41162	0.723088	0.769412	0.877243	0.789915	1.06817	0.944911	0.974917	0.996001	0.793086	0.0248463
A0A1D6KC60	Ubiquitin carboxyl-terminal hydrolase 10	103638427	Ubiquitin carboxyl-terminal hydrolase 10 OS=Zea mays OX=4577 GN=103638427 PE=3 SV=1 - [A0A1D6KC60_MAIZE]	1.55	1	1	3	452	50.8286	6.11279	0.747832	0.909808	0.858497	0.838713	1.08219	1.05252	1.04011	1.05827	0.792529	0.0112914
A0A1D6P022	UDP-glycosyltransferase 88A1	ZEAMMB73_Zm00001d045952	UDP-glycosyltransferase 88A1 OS=Zea mays OX=4577 GN=ZEAMMB73_Zm00001d045952 PE=4 SV=1 - [A0A1D6P022_MAIZE]	7.04	2	2	2	284	31.1911	5.43994	0.847786	0.882513		0.86515	1.06011	1.12469		1.0924	0.79197	0.0250542
A0A1D6QLC9	Cysteine-rich receptor-like protein kinase 6	ZEAMMB73_Zm00001d052989	Cysteine-rich receptor-like protein kinase 6 OS=Zea mays OX=4577 GN=ZEAMMB73_Zm00001d052989 PE=4 SV=1 - [A0A1D6QLC9_MAIZE]	8.57	3	3	9	315	35.3602	6.53662	0.70922	0.914873	0.855814	0.826636	1.08827	1.01476	1.0287	1.04391	0.791863	0.0289798
B4FR31	Leucine-rich repeat extensin-like protein 6	100281253	Leucine-rich repeat extensin-like protein 6 OS=Zea mays OX=4577 GN=100281253 PE=2 SV=1 - [B4FR31_MAIZE]	12.63	4	4	8	380	41.3479	6.37939	0.87233	0.916847	0.787881	0.859019	1.05356	1.04909	1.15241	1.08502	0.79171	0.011158
B4FK90	Brain protein 16		Brain protein 16 OS=Zea mays OX=4577 PE=2 SV=1 - [B4FK90_MAIZE]	2.89	1	1	2	346	37.4206	5.07178	0.851299	0.903313		0.877306	1.11895	1.09834		1.10865	0.79133	0.0143095
B4FPK8	Cytochrome B5 isoform D	ZEAMMB73_Zm00001d011786	Cytochrome B5 isoform D OS=Zea mays OX=4577 GN=ZEAMMB73_Zm00001d011786 PE=2 SV=1 - [B4FPK8_MAIZE]	37.78	1	4	14	135	14.9005	5.30029	0.868335	0.871945	0.97955	0.90661	1.09125	1.14563	1.20664	1.14784	0.789839	0.00815101
B6SQU6	60S ribosomal protein L9		60S ribosomal protein L9 OS=Zea mays OX=4577 PE=2 SV=1 - [B6SQU6_MAIZE]	39.47	1	8	35	190	21.4616	9.70068	0.826274	0.865676	0.957375	0.883108	1.10382	1.15667	1.09548	1.11866	0.789437	0.00554524
B6TG61	40S ribosomal protein S16	100283242	40S ribosomal protein S16 OS=Zea mays OX=4577 GN=100283242 PE=2 SV=1 - [B6TG61_MAIZE]	22.3	1	4	20	148	16.7392	10.6675	0.824526	1.02737	0.807135	0.886344	1.11922	1.04304	1.20612	1.12279	0.789411	0.0496473
B6TFE4	Ribokinase	ZEAMMB73_Zm00001d011526	Ribokinase OS=Zea mays OX=4577 GN=ZEAMMB73_Zm00001d011526 PE=2 SV=1 - [B6TFE4_MAIZE]	18.68	6	6	23	364	37.4865	6.26514	0.914853	0.901692	0.839589	0.885378	1.15153	1.09908	1.11562	1.12208	0.789051	0.00105787
A0A1D6L4K3	Inosine-5'-monophosphate dehydrogenase	ZEAMMB73_Zm00001d034023	Inosine-5'-monophosphate dehydrogenase OS=Zea mays OX=4577 GN=ZEAMMB73_Zm00001d034023 PE=3 SV=1 - [A0A1D6L4K3_MAIZE]	10.58	2	4	8	501	52.5377	6.27783	0.840517	0.864283	0.889019	0.864607	1.05792	1.01308	1.21652	1.09584	0.78899	0.0216962
A0A1D6N1C7	Villin-2	100273789	Villin-2 OS=Zea mays OX=4577 GN=100273789 PE=4 SV=1 - [A0A1D6N1C7_MAIZE]	9.34	2	6	10	632	69.9845	6.43018		0.936258	0.882848	0.909553		1.10409	1.20395	1.15402	0.788161	0.0496811
A0A1D6NJX0	Carbamoyl-phosphate synthase large chain chloroplastic	103651512	Carbamoyl-phosphate synthase large chain chloroplastic OS=Zea mays OX=4577 GN=103651512 PE=3 SV=1 - [A0A1D6NJX0_MAIZE]	11.47	4	14	22	1151	124.899	5.51611	0.826859	0.889214		0.858036	1.0742	1.10447		1.08933	0.78767	0.0217228
Q5XLE1	Peptidylprolyl isomerase	542519	Peptidylprolyl isomerase OS=Zea mays OX=4577 GN=542519 PE=2 SV=1 - [Q5XLE1_MAIZE]	14.29	1	1	13	112	12.1771	8.45557	0.850237	0.794987	0.906954	0.850726	1.10232	1.06501	1.07599	1.08111	0.786904	0.00252117
B6T346	THO complex subunit 4B	100279524	THO complex subunit 4B OS=Zea mays OX=4577 GN=100279524 PE=2 SV=1 - [B6T346_MAIZE]	39.92	4	9	32	253	26.5375	10.2427	0.97229	0.862591	0.89318	0.909354	1.12777	1.24929	1.09048	1.15585	0.786744	0.0131796
A0A1D6FEB9	Gamma-glutamyltranspeptidase 3	ZEAMMB73_Zm00001d008628	Gamma-glutamyltranspeptidase 3 OS=Zea mays OX=4577 GN=ZEAMMB73_Zm00001d008628 PE=4 SV=1 - [A0A1D6FEB9_MAIZE]	8.23	5	5	9	741	77.3169	7.47412	0.868166	0.906786	0.860141	0.878364	1.02623	1.13521	1.18886	1.11677	0.786525	0.00883033
B4G1R4	Peroxidase	100216859	Peroxidase OS=Zea mays OX=4577 GN=100216859 PE=2 SV=1 - [B4G1R4_MAIZE]	33.24	3	9	32	340	36.6633	6.87354	0.807842	0.974109	0.817241	0.866397	1.02834	1.07369	1.20733	1.10312	0.785407	0.0358754
B6TNG9	Aminoacylase-1		Aminoacylase-1 OS=Zea mays OX=4577 PE=2 SV=1 - [B6TNG9_MAIZE]	10.48	4	4	16	439	48.2936	6.48096	0.76588	0.867399	0.899008	0.844096	1.1012	1.0856	1.03742	1.07474	0.785397	0.00659795
B6SP06	Glycine-rich protein 2b		Glycine-rich protein 2b OS=Zea mays OX=4577 PE=2 SV=1 - [B6SP06_MAIZE]	63.46	8	8	22	208	20.2869	6.34131	0.8147	0.895649	0.877055	0.862468	1.15726	1.13717	1.00102	1.09848	0.785144	0.0126108
A0A1D6FBJ6	Peroxidase	ZEAMMB73_Zm00001d008300	Peroxidase OS=Zea mays OX=4577 GN=ZEAMMB73_Zm00001d008300 PE=3 SV=1 - [A0A1D6FBJ6_MAIZE]	15.3	3	4	6	353	38.6066	6.78564	0.936826	0.892598		0.914712	1.21795	1.11262		1.16528	0.78497	0.0482392
C4J5T9	Uncharacterized protein		Uncharacterized protein OS=Zea mays OX=4577 PE=2 SV=1 - [C4J5T9_MAIZE]	6.23	3	3	5	546	58.4453	7.89893	0.915346	0.877021	0.798474	0.863614	1.05004	1.08793	1.16549	1.10115	0.784282	0.00796848
A0A1D6IYF8	RNA-binding KH domain-containing protein	100384498	RNA-binding KH domain-containing protein OS=Zea mays OX=4577 GN=100384498 PE=4 SV=1 - [A0A1D6IYF8_MAIZE]	5.24	4	4	12	611	66.6516	7.62061	0.780668	0.971067	0.862297	0.871344	1.12809	1.08752	1.12149	1.11237	0.783324	0.0130422
A0A1D6M2Z2	Putative thaumatin domain family protein	ZEAMMB73_Zm00001d038069	Putative thaumatin domain family protein OS=Zea mays OX=4577 GN=ZEAMMB73_Zm00001d038069 PE=4 SV=1 - [A0A1D6M2Z2_MAIZE]	11.23	3	3	5	276	28.083	6.34131	0.844154	0.843662	0.916971	0.868262	1.05032	1.1868	1.08878	1.10863	0.783184	0.00710825
C4J9U1	Ras-related protein18A1	100383817	Ras-related protein18A1 OS=Zea mays OX=4577 GN=100383817 PE=2 SV=1 - [C4J9U1_MAIZE]	16.28	2	4	8	215	23.725	5.5415	0.777148	0.931656	0.92228	0.877028	1.15375	1.06085	1.14594	1.12018	0.782935	0.013937
A0A1D6L2M4	Histone H2A	ZEAMMB73_Zm00001d033822	Histone H2A OS=Zea mays OX=4577 GN=ZEAMMB73_Zm00001d033822 PE=3 SV=1 - [A0A1D6L2M4_MAIZE]	18.98	1	3	37	137	14.3698	10.2134	0.852236	0.856314	0.980849	0.896466	1.10295	1.23287	1.10209	1.14597	0.78228	0.0146268
B6T1H5	60S ribosomal protein L12-3	100281960	60S ribosomal protein L12-3 OS=Zea mays OX=4577 GN=100281960 PE=2 SV=1 - [B6T1H5_MAIZE]	43.37	1	6	19	166	17.7576	8.96826	0.834643	0.833948	1.08144	0.916677	1.1525	1.22889	1.13459	1.17199	0.782152	0.0430571
K7VEJ7	Nicotianamine synthase10	ZEAMMB73_Zm00001d047651	Nicotianamine synthase10 OS=Zea mays OX=4577 GN=ZEAMMB73_Zm00001d047651 PE=4 SV=1 - [K7VEJ7_MAIZE]	12.23	3	4	15	327	35.5472	6.46826	0.776569	0.963787	0.773969	0.838108	1.08758	1.09184	1.0355	1.07164	0.782079	0.0233599
B4FYN0	mitochondrial import inner membrane translocase subunit TIM13	100285351	mitochondrial import inner membrane translocase subunit TIM13 OS=Zea mays OX=4577 GN=100285351 PE=2 SV=1 - [B4FYN0_MAIZE]	11.49	1	1	9	87	9.28442	5.31299	0.870181	0.794248	0.93531	0.86658	1.05478	1.16312	1.10831	1.10874	0.781593	0.00921631
K7V329	Putative O-Glycosyl hydrolase superfamily protein	100502339	Putative O-Glycosyl hydrolase superfamily protein OS=Zea mays OX=4577 GN=100502339 PE=4 SV=1 - [K7V329_MAIZE]	6.85	4	5	10	774	82.8195	6.18896	0.771	0.872779	0.92446	0.85608	1.09561	1.12076	1.07024	1.09554	0.781423	0.00721087
K7U735	Dirigent protein	103654365	Dirigent protein OS=Zea mays OX=4577 GN=103654365 PE=3 SV=1 - [K7U735_MAIZE]	4.65	1	1	7	172	19.0874	6.32861	0.918937	0.858556	0.894281	0.890591	1.3106	1.06267	1.04615	1.1398	0.781355	0.0461876
B4FU14	mitochondrial import inner membrane translocase subunit Tim9	100285519	mitochondrial import inner membrane translocase subunit Tim9 OS=Zea mays OX=4577 GN=100285519 PE=2 SV=1 - [B4FU14_MAIZE]	44.09	4	4	16	93	10.8592	6.11279	0.825789	0.812374	0.93649	0.858218	1.06562	1.2397	0.991093	1.09881	0.781045	0.0449571
B6T3V3	Mitochondrial import receptor subunit TOM22	TOM9-2	Mitochondrial import receptor subunit TOM22 OS=Zea mays OX=4577 GN=TOM9-2 PE=2 SV=1 - [B6T3V3_MAIZE]	31.91	4	4	26	94	9.75929	9.40771	0.813173	0.846285	0.868662	0.842707	1.07011	1.06032	1.10844	1.07963	0.780555	0.000407128
A0A1D6LUH5	Uncharacterized protein	100283265	Uncharacterized protein OS=Zea mays OX=4577 GN=100283265 PE=4 SV=1 - [A0A1D6LUH5_MAIZE]	8.93	1	3	8	347	36.8916	7.88428	0.8527	0.893019	0.931398	0.892372	1.15001	1.13832	1.14213	1.14349	0.780397	0.000398255
B8A0Q6	Succinate dehydrogenase [ubiquinone] flavoprotein subunit, mitochondrial	100279930	Succinate dehydrogenase [ubiquinone] flavoprotein subunit, mitochondrial OS=Zea mays OX=4577 GN=100279930 PE=2 SV=1 - [B8A0Q6_MAIZE]	10.34	1	5	11	619	67.9266	6.45557	0.875674	0.816352		0.846013	1.10803	1.06151		1.08477	0.779903	0.0240316
A0A1D6E839	Topoisomerase-like protein	ZEAMMB73_Zm00001d003265	Topoisomerase-like protein OS=Zea mays OX=4577 GN=ZEAMMB73_Zm00001d003265 PE=4 SV=1 - [A0A1D6E839_MAIZE]	6.17	3	3	7	665	73.544	5.12256	0.767954	0.904932	0.812403	0.82843	1.0654	1.02284	1.09912	1.06245	0.779732	0.00703688
B8A1J4	Uncharacterized protein		Uncharacterized protein OS=Zea mays OX=4577 PE=2 SV=1 - [B8A1J4_MAIZE]	9.71	1	1	5	103	11.4171	8.49951	0.858792	0.852034	0.862814	0.85788	1.02962	1.12598	1.14597	1.10052	0.779519	0.00254054
A0A317Y8X0	L-type lectin-domain containing receptor kinase IV.1	LECRK41_12	L-type lectin-domain containing receptor kinase IV.1 OS=Zea mays OX=4577 GN=LECRK41_12 PE=4 SV=1 - [A0A317Y8X0_MAIZE]	1.48	1	1	7	677	73.4727	6.7124	0.708557	0.880169	0.919147	0.835958	1.10657	1.04018	1.07073	1.07249	0.779453	0.0247684
A0A1D6F5Y9	OSJNBa0089K21.9-like protein	ZEAMMB73_Zm00001d007389	OSJNBa0089K21.9-like protein OS=Zea mays OX=4577 GN=ZEAMMB73_Zm00001d007389 PE=4 SV=1 - [A0A1D6F5Y9_MAIZE]	4.55	1	1	2	176	20.0252	9.48096	0.842755		0.854233	0.848494	1.05387		1.1258	1.08984	0.778553	0.0220229
A0A1D6GBA2	Phosphoenolpyruvate carboxylase 3	100384708	Phosphoenolpyruvate carboxylase 3 OS=Zea mays OX=4577 GN=100384708 PE=3 SV=1 - [A0A1D6GBA2_MAIZE]	4.6	1	5	26	892	101.607	6.7417		0.917448	0.862796	0.890122		1.10313	1.18698	1.14506	0.777361	0.0364458
A0A1D6LBD6	40S ribosomal protein S4	ZEAMMB73_Zm00001d034790	40S ribosomal protein S4 OS=Zea mays OX=4577 GN=ZEAMMB73_Zm00001d034790 PE=3 SV=1 - [A0A1D6LBD6_MAIZE]	36.84	3	10	90	247	27.9869	10.0229	0.808762	0.886367	0.928849	0.874659	1.14976	1.11428	1.11199	1.12535	0.777236	0.00253248
A0A1D6G8P5	Ribosomal protein L17 family protein	100284384	Ribosomal protein L17 family protein OS=Zea mays OX=4577 GN=100284384 PE=3 SV=1 - [A0A1D6G8P5_MAIZE]	5.93	1	1	5	135	15.4782	10.3452	0.758459	0.793995	0.905734	0.819396	1.04128	1.14346	0.982234	1.05566	0.776194	0.021745
A0A1D6P5H9	Transducin/WD40 repeat-like superfamily protein	ZEAMMB73_Zm00001d046930	Transducin/WD40 repeat-like superfamily protein OS=Zea mays OX=4577 GN=ZEAMMB73_Zm00001d046930 PE=4 SV=1 - [A0A1D6P5H9_MAIZE]	2.15	1	1	4	326	36.5052	7.56201	0.820525	0.777476	0.941175	0.846392	1.21562	1.00313	1.05524	1.09133	0.775558	0.0383755
A0A1D6IHR1	Uncharacterized protein	ZEAMMB73_Zm00001d021900	Uncharacterized protein OS=Zea mays OX=4577 GN=ZEAMMB73_Zm00001d021900 PE=4 SV=1 - [A0A1D6IHR1_MAIZE]	5.37	3	3	5	559	59.0053	6.25244	0.762179	0.965489	0.821479	0.849715	1.11385	0.976319	1.19708	1.09575	0.775465	0.049407
A0A317YGU2	Peptidyl-prolyl cis-trans isomerase	CYP18-2	Peptidyl-prolyl cis-trans isomerase OS=Zea mays OX=4577 GN=CYP18-2 PE=3 SV=1 - [A0A317YGU2_MAIZE]	22	3	3	4	150	16.4431	7.89893	0.886414	0.808776		0.847595	1.05568	1.13329		1.09449	0.774421	0.0460376
A0A1D6FP28	Peroxidase	ZEAMMB73_Zm00001d010064	Peroxidase OS=Zea mays OX=4577 GN=ZEAMMB73_Zm00001d010064 PE=3 SV=1 - [A0A1D6FP28_MAIZE]	15.9	1	5	24	327	35.4407	7.86963	0.859699		0.915974	0.887836	1.11409		1.18125	1.14767	0.773601	0.0272719
B4FPJ2	U6 snRNA-associated Sm-like protein LSm3	LSM3	U6 snRNA-associated Sm-like protein LSm3 OS=Zea mays OX=4577 GN=LSM3 PE=2 SV=1 - [B4FPJ2_MAIZE]	12.24	1	1	13	98	11.229	4.88135	0.857794	0.856864	0.879621	0.864759	1.06904	1.15159	1.13572	1.11878	0.772948	0.000648404
B8QN51	Mitogen-activated protein kinase	MPK7	Mitogen-activated protein kinase OS=Zea mays OX=4577 GN=MPK7 PE=2 SV=1 - [B8QN51_MAIZE]	12.85	3	5	16	397	44.9064	5.5542	0.919381	0.693694	0.957259	0.856778	1.04316	1.16462	1.12153	1.10977	0.772033	0.0476936
A0A1D6KI84	COP9 signalosome complex subunit 6a	100284689	COP9 signalosome complex subunit 6a OS=Zea mays OX=4577 GN=100284689 PE=4 SV=1 - [A0A1D6KI84_MAIZE]	4.6	1	1	4	261	28.1675	6.90283	0.879008	0.961965	0.884409	0.908461	1.13925	1.04832	1.34432	1.1773	0.771649	0.0425361
A0A1D6PDS8	Protein TOC75-3 chloroplastic	100501833	Protein TOC75-3 chloroplastic OS=Zea mays OX=4577 GN=100501833 PE=4 SV=1 - [A0A1D6PDS8_MAIZE]	20.48	2	11	24	625	69.3002	7.15186	0.739023	0.909706	0.955019	0.867916	1.17204	1.14143	1.06328	1.12559	0.77108	0.0245549
B6TLA2	Thioredoxin reductase		Thioredoxin reductase OS=Zea mays OX=4577 PE=2 SV=1 - [B6TLA2_MAIZE]	14.2	3	4	9	331	34.8564	5.8335	0.826755	0.749346	0.839321	0.805141	1.00978	1.12217	1.00292	1.04496	0.7705	0.00740543
A0A1D6G5V1	Mitochondrial import receptor subunit TOM20-4	ZEAMMB73_Zm00001d012017	Mitochondrial import receptor subunit TOM20-4 OS=Zea mays OX=4577 GN=ZEAMMB73_Zm00001d012017 PE=4 SV=1 - [A0A1D6G5V1_MAIZE]	56.07	5	5	14	107	11.6497	8.29443	0.816639	0.806854	0.870135	0.831209	1.06186	1.09052	1.08553	1.0793	0.770136	0.000325725
B4FLH6	NADH dehydrogenase [ubiquinone] 1 beta subcomplex subunit 7	100283425	NADH dehydrogenase [ubiquinone] 1 beta subcomplex subunit 7 OS=Zea mays OX=4577 GN=100283425 PE=2 SV=1 - [B4FLH6_MAIZE]	20.37	2	2	5	108	11.9531	7.78174	0.887939	0.877639	0.797185	0.854254	1.00667	1.10206	1.2214	1.11004	0.769571	0.0201487
A0A1D6QCK6	Mitogen-activated protein kinase kinase 5	ZEAMMB73_Zm00001d052066	Mitogen-activated protein kinase kinase 5 OS=Zea mays OX=4577 GN=ZEAMMB73_Zm00001d052066 PE=3 SV=1 - [A0A1D6QCK6_MAIZE]	5.77	2	2	7	364	39.4493	9.34912	0.862977	0.853369	0.889527	0.868624	1.08508	1.13697	1.16552	1.12919	0.769245	0.000549695
A0A1D6NJF4	Seh1-like protein	100284280	Seh1-like protein OS=Zea mays OX=4577 GN=100284280 PE=3 SV=1 - [A0A1D6NJF4_MAIZE]	4.02	1	1	3	249	27.4122	4.98291	0.801227	0.900182		0.850704	1.12527	1.08674		1.106	0.769169	0.0406354
C0P846	Uncharacterized protein		Uncharacterized protein OS=Zea mays OX=4577 PE=2 SV=1 - [C0P846_MAIZE]	5.97	2	3	6	486	54.0317	6.771	0.842678	0.828982	0.82856	0.833406	1.07415	1.06273	1.11489	1.08392	0.768881	0.000109643
K7V969	Protein EXORDIUM	103637861	Protein EXORDIUM OS=Zea mays OX=4577 GN=103637861 PE=4 SV=1 - [K7V969_MAIZE]	7.93	2	2	5	328	32.9066	8.68994	0.872315	0.900427	0.703561	0.825434	0.976715	1.08993	1.15772	1.07479	0.767996	0.0370351
A0A1D6GFD7	Vacuolar protein sorting-associated protein 35	100279276	Vacuolar protein sorting-associated protein 35 OS=Zea mays OX=4577 GN=100279276 PE=3 SV=1 - [A0A1D6GFD7_MAIZE]	13.21	1	10	21	780	88.1683	5.49072	0.761985	0.836558		0.799271	1.05329	1.03017		1.04173	0.767255	0.0249563
B4FGG1	40S ribosomal protein S8		40S ribosomal protein S8 OS=Zea mays OX=4577 PE=2 SV=1 - [B4FGG1_MAIZE]	31.67	1	6	42	221	25.0964	10.3452	0.799682	0.792653	0.929802	0.840712	1.07637	1.14677	1.0667	1.09661	0.766643	0.00751917
B6TKC5	Nucleoside diphosphate kinase		Nucleoside diphosphate kinase OS=Zea mays OX=4577 PE=2 SV=1 - [B6TKC5_MAIZE]	23.95	2	6	21	238	25.9335	9.01221	0.816522	0.808747	0.873031	0.832767	1.05507	1.14573	1.06208	1.08763	0.765672	0.00198829
A0A1D6IYM2	AICARFT/IMPCHase bienzyme family protein	ZEAMMB73_Zm00001d024301	AICARFT/IMPCHase bienzyme family protein OS=Zea mays OX=4577 GN=ZEAMMB73_Zm00001d024301 PE=4 SV=1 - [A0A1D6IYM2_MAIZE]	4.05	1	1	3	321	34.9795	7.15186	0.752205	0.948713	0.858246	0.853054	1.08376	1.04824	1.21042	1.11414	0.765661	0.0254847
A0A1D6HD71	DNA-directed RNA polymerases II IV and V subunit 11	ZEAMMB73_Zm00001d017234	DNA-directed RNA polymerases II IV and V subunit 11 OS=Zea mays OX=4577 GN=ZEAMMB73_Zm00001d017234 PE=4 SV=1 - [A0A1D6HD71_MAIZE]	10.64	1	1	5	94	10.9645	6.52197	0.842684	0.814262	0.887363	0.848103	1.05209	1.17184	1.10255	1.10883	0.764864	0.00305346
A0A1D6H7D6	Coatomer subunit beta'	100383977	Coatomer subunit beta' OS=Zea mays OX=4577 GN=100383977 PE=3 SV=1 - [A0A1D6H7D6_MAIZE]	13.65	2	10	35	813	92.13	5.24951	0.770515	0.881392		0.825953	1.07229	1.09016		1.08122	0.763907	0.0451402
A0A1D6JZE2	Mitochondrial succinate-fumarate transporter 1	100191274	Mitochondrial succinate-fumarate transporter 1 OS=Zea mays OX=4577 GN=100191274 PE=3 SV=1 - [A0A1D6JZE2_MAIZE]	6.87	1	1	3	131	14.5115	9.92041	0.752393	0.874514	0.923799	0.850235	1.12524	1.05972	1.15596	1.11364	0.763475	0.0106868
B4FE30	10 kDa chaperonin	100193174	10 kDa chaperonin OS=Zea mays OX=4577 GN=100193174 PE=2 SV=1 - [B4FE30_MAIZE]	47.96	1	5	20	98	10.5369	8.39697	0.896125	0.819617	0.943196	0.886312	1.12798	1.23933	1.11903	1.16211	0.762672	0.00643666
A0A1D6MU58	E3 ubiquitin-protein ligase UPL1	ZEAMMB73_Zm00001d041105	E3 ubiquitin-protein ligase UPL1 OS=Zea mays OX=4577 GN=ZEAMMB73_Zm00001d041105 PE=4 SV=1 - [A0A1D6MU58_MAIZE]	3.99	5	14	28	3531	389.267	5.63037	0.862385	0.921312	0.794409	0.859369	1.09826	1.0433	1.24087	1.12748	0.762207	0.0180629
A0A1D6HKY0	SNW/SKI-interacting protein	ZEAMMB73_Zm00001d018127	SNW/SKI-interacting protein OS=Zea mays OX=4577 GN=ZEAMMB73_Zm00001d018127 PE=4 SV=1 - [A0A1D6HKY0_MAIZE]	5.69	2	2	4	580	65.0079	9.29053	0.839439	0.899888	0.830273	0.856533	1.08349	1.14968	1.13994	1.12437	0.76179	0.000874982
C0PN11	Uncharacterized protein		Uncharacterized protein OS=Zea mays OX=4577 PE=2 SV=1 - [C0PN11_MAIZE]	3.45	1	1	2	232	24.849	6.0874	0.84008	0.826023		0.833051	1.12921	1.05881		1.09401	0.761464	0.0183969
B6U6D5	ATP-dependent 6-phosphofructokinase	PFK	ATP-dependent 6-phosphofructokinase OS=Zea mays OX=4577 GN=PFK PE=2 SV=1 - [B6U6D5_MAIZE]	11.71	4	6	21	538	58.9379	7.86963	0.851584	0.848886	0.805558	0.835343	1.08214	1.0567	1.15585	1.09823	0.760627	0.00138605
A0A1D6GUM3	Ribosomal RNA processing Brix domain protein	100216667	Ribosomal RNA processing Brix domain protein OS=Zea mays OX=4577 GN=100216667 PE=4 SV=1 - [A0A1D6GUM3_MAIZE]	13.4	1	1	3	97	10.9335	6.7124	0.827912	0.835716		0.831814	1.04701	1.14398		1.0955	0.759303	0.0323865
A0A1D6M542	Ferredoxin	ZEAMMB73_Zm00001d038291	Ferredoxin OS=Zea mays OX=4577 GN=ZEAMMB73_Zm00001d038291 PE=3 SV=1 - [A0A1D6M542_MAIZE]	6.49	1	1	4	154	16.1447	5.46533	0.94371	0.994304	0.709557	0.882524	1.19214	1.17936	1.1188	1.16343	0.758552	0.0361752
B4FP91	Epoxide hydrolase A	ephA_5	Epoxide hydrolase A OS=Zea mays OX=4577 GN=ephA_5 PE=2 SV=1 - [B4FP91_MAIZE]	3.02	1	1	3	331	37.1419	8.08936	0.813537	0.864775		0.839156	1.08738	1.12521		1.10629	0.758529	0.0139124
C0P5C9	Vacuolar sorting receptor 7	ZEAMMB73_Zm00001d046945	Vacuolar sorting receptor 7 OS=Zea mays OX=4577 GN=ZEAMMB73_Zm00001d046945 PE=2 SV=1 - [C0P5C9_MAIZE]	5.41	3	4	13	629	69.5815	6.17627	0.732857	0.970226	0.787988	0.830357	1.11327	1.08139	1.09297	1.09588	0.75771	0.0213683
B6SJE6	Flower-specific gamma-thionin		Flower-specific gamma-thionin OS=Zea mays OX=4577 PE=2 SV=1 - [B6SJE6_MAIZE]	36.92	3	3	22	65	7.24848	10.1694	0.834204	0.818045	0.777673	0.809974	1.00895	1.14446	1.05668	1.07003	0.756964	0.0038021
A0A1D6HJQ5	Dynamin-2A	103627697	Dynamin-2A OS=Zea mays OX=4577 GN=103627697 PE=3 SV=1 - [A0A1D6HJQ5_MAIZE]	10.64	4	11	25	921	100.246	9.17334	0.793675	0.916693	0.83725	0.849206	1.15628	1.11313	1.09817	1.12253	0.756514	0.0024005
A0A1D6PHQ2	Tetratricopeptide repeat (TPR)-like superfamily protein	100304428	Tetratricopeptide repeat (TPR)-like superfamily protein OS=Zea mays OX=4577 GN=100304428 PE=4 SV=1 - [A0A1D6PHQ2_MAIZE]	5.56	4	4	9	720	80.6378	4.88135	0.735234	0.834214	0.827016	0.798821	1.10648	0.981244	1.08412	1.05728	0.755541	0.00666639
B4FPG2	Actin-1	100282267	Actin-1 OS=Zea mays OX=4577 GN=100282267 PE=2 SV=1 - [B4FPG2_MAIZE]	18.88	2	7	42	376	41.6137	5.38916	0.713953	0.791362	1.02214	0.842486	1.13509	1.07645	1.13402	1.11519	0.755465	0.0448511
A0A1D6QRX4	Ubiquitin receptor RAD23b	100282427	Ubiquitin receptor RAD23b OS=Zea mays OX=4577 GN=100282427 PE=4 SV=1 - [A0A1D6QRX4_MAIZE]	10.43	2	3	6	345	37.1994	4.55127	0.88138	0.897233	0.829066	0.869227	0.99755	1.30647	1.15132	1.15178	0.754682	0.0366755
C0PH34	60S ribosomal protein L6	103627361	60S ribosomal protein L6 OS=Zea mays OX=4577 GN=103627361 PE=2 SV=1 - [C0PH34_MAIZE]	35.16	3	9	44	219	24.2232	10.0962	0.712397	0.924868	0.798097	0.811787	1.12583	1.04311	1.05834	1.07576	0.754615	0.0167481
A0A1D6N9U7	External alternative NAD(P)H-ubiquinone oxidoreductase B4 mitochondrial	ZEAMMB73_Zm00001d043266	External alternative NAD(P)H-ubiquinone oxidoreductase B4 mitochondrial OS=Zea mays OX=4577 GN=ZEAMMB73_Zm00001d043266 PE=4 SV=1 - [A0A1D6N9U7_MAIZE]	5.71	2	3	8	578	65.2735	9.01221	0.853221	0.794622		0.823922	1.10135	1.08635		1.09385	0.753231	0.0123233
A0A1D6L917	Mitochondrial Rho GTPase 1	103644237	Mitochondrial Rho GTPase 1 OS=Zea mays OX=4577 GN=103644237 PE=4 SV=1 - [A0A1D6L917_MAIZE]	14.26	2	6	9	561	62.7873	5.88428	0.861206	0.844181		0.852694	1.09199	1.17755		1.13477	0.751422	0.0230868
A0A1D6KCJ1	Alpha-L-fucosidase 2	ZEAMMB73_Zm00001d030471	Alpha-L-fucosidase 2 OS=Zea mays OX=4577 GN=ZEAMMB73_Zm00001d030471 PE=4 SV=1 - [A0A1D6KCJ1_MAIZE]	1.86	1	1	2	698	77.3216	5.56689	0.840993		0.851093	0.846043	1.14523		1.10921	1.12722	0.750558	0.00439528
A0A1D6MXW5	Heat shock protein 90-6 mitochondrial	100286003	Heat shock protein 90-6 mitochondrial OS=Zea mays OX=4577 GN=100286003 PE=3 SV=1 - [A0A1D6MXW5_MAIZE]	13.82	5	9	32	738	83.0774	5.60498	0.73756	0.828778	0.909331	0.825223	1.07882	1.15202	1.06775	1.09953	0.750522	0.00816634
A0A1D6HPW5	Protein BTR1	100273088	Protein BTR1 OS=Zea mays OX=4577 GN=100273088 PE=4 SV=1 - [A0A1D6HPW5_MAIZE]	23.64	1	6	17	313	33.51	5.88428	0.787074	0.9095	0.899165	0.865246	1.14005	1.2313	1.08842	1.15326	0.750263	0.00734505
A0A1D6HYA6	COP1-interacting protein-related	103632278	COP1-interacting protein-related OS=Zea mays OX=4577 GN=103632278 PE=4 SV=1 - [A0A1D6HYA6_MAIZE]	3.45	3	3	6	870	96.8166	8.47021	0.799529	0.899358	0.865601	0.85483	1.13595	1.20304	1.08329	1.14076	0.749351	0.00324598
B6TRW5	Uncharacterized protein		Uncharacterized protein OS=Zea mays OX=4577 PE=2 SV=1 - [B6TRW5_MAIZE]	3.62	1	1	3	359	39.1449	9.61279	0.711572	0.909527	0.995846	0.872315	1.14174	1.163	1.19089	1.16521	0.748634	0.0264852
B4FJ20	Purine-uracil permease NCS1	100216652	Purine-uracil permease NCS1 OS=Zea mays OX=4577 GN=100216652 PE=2 SV=1 - [B4FJ20_MAIZE]	1.66	1	1	2	541	57.4263	9.65674		0.801182	0.817273	0.809228		1.04181	1.12137	1.08159	0.748183	0.0214929
B4FNR5	U6 snRNA-associated Sm-like protein LSm8	100284021	U6 snRNA-associated Sm-like protein LSm8 OS=Zea mays OX=4577 GN=100284021 PE=2 SV=1 - [B4FNR5_MAIZE]	16.16	1	1	3	99	10.8827	5.18604	0.711102	0.853481	0.813417	0.792667	1.08034	1.05449	1.04474	1.05986	0.7479	0.00362315
C0PKB8	Uncharacterized protein		Uncharacterized protein OS=Zea mays OX=4577 PE=2 SV=1 - [C0PKB8_MAIZE]	8.02	2	2	19	212	22.3236	6.52197	0.790211	0.847432	0.795729	0.811124	1.02062	1.07943	1.1549	1.08498	0.747593	0.00309606
C0P7E7	Actin-interacting protein 1-2	100382413	Actin-interacting protein 1-2 OS=Zea mays OX=4577 GN=100382413 PE=2 SV=1 - [C0P7E7_MAIZE]	21.67	2	11	20	609	66.1654	6.7124	0.873165	0.838831		0.855998	1.15547	1.13518		1.14532	0.747385	0.0047168
A0A1D6EIB9	2-isopropylmalate synthase 1 chloroplastic	ZEAMMB73_Zm00001d004960	2-isopropylmalate synthase 1 chloroplastic OS=Zea mays OX=4577 GN=ZEAMMB73_Zm00001d004960 PE=3 SV=1 - [A0A1D6EIB9_MAIZE]	13.85	2	5	9	621	66.322	7.23975	0.963597	0.751739	0.900105	0.871814	1.10319	1.23901	1.16148	1.16789	0.746485	0.0161742
A0A1D6N3M7	DEAD box RNA helicase1	ZEAMMB73_Zm00001d042416	DEAD box RNA helicase1 OS=Zea mays OX=4577 GN=ZEAMMB73_Zm00001d042416 PE=3 SV=1 - [A0A1D6N3M7_MAIZE]	18.88	5	7	16	445	49.5117	9.5542	0.860606	0.879559	0.836558	0.858908	1.09248	1.14173	1.22031	1.1515	0.7459	0.00172975
A0A1D6NDK6	MEK homolog1	542356	MEK homolog1 OS=Zea mays OX=4577 GN=542356 PE=3 SV=1 - [A0A1D6NDK6_MAIZE]	3.24	1	1	3	309	34.5939	6.17627	0.738552	0.84106	0.874732	0.818115	1.14591	1.0476	1.09699	1.09683	0.745887	0.00501154
A0A1D6NDD7	HVA22-like protein	ZEAMMB73_Zm00001d043578	HVA22-like protein OS=Zea mays OX=4577 GN=ZEAMMB73_Zm00001d043578 PE=3 SV=1 - [A0A1D6NDD7_MAIZE]	10.53	1	1	2	114	13.517	9.83252	0.799083		0.83904	0.819061	1.09657		1.10598	1.10128	0.743739	0.00524757
B4FGJ4	Pyruvate dehydrogenase E1 component subunit alpha	732791	Pyruvate dehydrogenase E1 component subunit alpha OS=Zea mays OX=4577 GN=732791 PE=2 SV=1 - [B4FGJ4_MAIZE]	35.9	1	14	50	390	42.7234	8.19189	0.867495	0.757294	0.885134	0.836641	1.11762	1.16723	1.09377	1.12621	0.742883	0.00311897
A0A1D6F150	Alpha/beta-Hydrolases superfamily protein	100192944	Alpha/beta-Hydrolases superfamily protein OS=Zea mays OX=4577 GN=100192944 PE=4 SV=1 - [A0A1D6F150_MAIZE]	7.34	1	1	4	218	24.384	5.59229	0.661027	0.825813	0.960311	0.815717	1.12398	1.09277	1.07876	1.0985	0.742574	0.031998
A0A1D6L6W5	Syntaxin 121	ZEAMMB73_Zm00001d034365	Syntaxin 121 OS=Zea mays OX=4577 GN=ZEAMMB73_Zm00001d034365 PE=3 SV=1 - [A0A1D6L6W5_MAIZE]	10.13	3	3	6	306	33.1974	8.42627	0.709771	0.893122	0.881165	0.828019	1.15803	1.06534	1.12425	1.11587	0.742038	0.0115101
B6SX86	Uncharacterized protein		Uncharacterized protein OS=Zea mays OX=4577 PE=2 SV=1 - [B6SX86_MAIZE]	7.69	1	1	2	117	12.1159	5.49072	0.773765		0.873089	0.823427	1.11072		1.11161	1.11116	0.741049	0.0285232
B6SGJ8	Uncharacterized protein		Uncharacterized protein OS=Zea mays OX=4577 PE=2 SV=1 - [B6SGJ8_MAIZE]	20.43	1	2	9	93	9.73004	5.10986	0.901486	0.819231	0.863343	0.861353	1.09306	1.22877	1.16716	1.16299	0.740634	0.00276722
A0A1D6KSJ3	Cytochrome P450 86B1	ZEAMMB73_Zm00001d032651	Cytochrome P450 86B1 OS=Zea mays OX=4577 GN=ZEAMMB73_Zm00001d032651 PE=3 SV=1 - [A0A1D6KSJ3_MAIZE]	1.48	1	1	4	540	60.2082	8.20654	0.990263	0.828504	0.727707	0.848825	1.10706	1.12868	1.2032	1.14631	0.740482	0.0220518
B4FC78	Uncharacterized protein		Uncharacterized protein OS=Zea mays OX=4577 PE=2 SV=1 - [B4FC78_MAIZE]	8.9	2	2	5	191	21.1106	6.354	0.75847	0.886774		0.822622	1.12356	1.10251		1.11304	0.739079	0.0466329
C0P406	Vesicle-fusing ATPase	100382060	Vesicle-fusing ATPase OS=Zea mays OX=4577 GN=100382060 PE=2 SV=1 - [C0P406_MAIZE]	11.47	2	8	36	741	81.2672	6.06201	0.774233	0.836816	0.812691	0.807913	1.0541	1.114	1.11288	1.09366	0.738725	0.000444338
B4FY73	Germin-like protein subfamily 2 member 1	100273935	Germin-like protein subfamily 2 member 1 OS=Zea mays OX=4577 GN=100273935 PE=2 SV=1 - [B4FY73_MAIZE]	34.86	3	6	46	218	22.8066	7.09326	0.947471	0.769932	0.763475	0.82696	1.0168	1.15763	1.18906	1.12116	0.737592	0.0214612
A0A1D6PZE3	Putative fucosyltransferase-like protein	778434	Putative fucosyltransferase-like protein OS=Zea mays OX=4577 GN=778434 PE=3 SV=1 - [A0A1D6PZE3_MAIZE]	3.85	1	1	3	338	36.9011	4.99561	0.712901	0.976177	0.789335	0.826138	1.20086	1.02187	1.14044	1.12106	0.736927	0.0351879
A0A1D6DXC1	Eukaryotic translation initiation factor 3 subunit C	100272475	Eukaryotic translation initiation factor 3 subunit C OS=Zea mays OX=4577 GN=100272475 PE=3 SV=1 - [A0A1D6DXC1_MAIZE]	11.91	1	10	30	915	104.552	5.47803	0.731776	0.842345	0.849983	0.808035	1.16124	1.10664	1.0216	1.09649	0.736926	0.00663809
A0A1D6H4T9	Uncharacterized protein	100276733	Uncharacterized protein OS=Zea mays OX=4577 GN=100276733 PE=4 SV=1 - [A0A1D6H4T9_MAIZE]	8.87	1	1	2	124	13.5661	8.73389	0.816618	0.817879		0.817249	1.12406	1.0941		1.10908	0.736869	0.00262971
A0A1D6IL72	Phosphatidylinositol 3-and 4-kinase family protein with FAT domain	ZEAMMB73_Zm00001d022338	Phosphatidylinositol 3-and 4-kinase family protein with FAT domain OS=Zea mays OX=4577 GN=ZEAMMB73_Zm00001d022338 PE=3 SV=1 - [A0A1D6IL72_MAIZE]	0.57	2	2	2	3882	439.556	7.28369	0.853577	0.780197		0.816887	1.11407	1.11356		1.11382	0.733413	0.014928
B6SZF0	Metal-dependent phosphohydrolase, HD subdomain	100281834	Metal-dependent phosphohydrolase, HD subdomain OS=Zea mays OX=4577 GN=100281834 PE=2 SV=1 - [B6SZF0_MAIZE]	18.92	3	3	5	222	24.9987	5.69385		0.837058	0.830777	0.833917		1.15678	1.12401	1.14039	0.731254	0.00294998
B6T337	Uncharacterized protein	101202700	Uncharacterized protein OS=Zea mays OX=4577 GN=101202700 PE=2 SV=1 - [B6T337_MAIZE]	6.3	1	1	3	127	14.7018	10.1255	0.731572	0.855314	0.942712	0.843199	1.14437	1.1653	1.15173	1.1538	0.730801	0.00725266
C0P3X0	Farnesyl pyrophosphate synthase1	541903	Farnesyl pyrophosphate synthase1 OS=Zea mays OX=4577 GN=541903 PE=2 SV=1 - [C0P3X0_MAIZE]	5.38	1	2	5	316	36.4106	5.60498	0.809066	0.757152	0.864954	0.810391	1.09926	1.12599	1.10518	1.11014	0.729988	0.000737905
A0A096RYW9	Pentatricopeptide repeat-containing protein ELI1 chloroplastic	100193853	Pentatricopeptide repeat-containing protein ELI1 chloroplastic OS=Zea mays OX=4577 GN=100193853 PE=4 SV=1 - [A0A096RYW9_MAIZE]	1.75	1	1	2	399	44.3672	6.55127	0.767266		0.818853	0.793059	1.09228		1.08446	1.08837	0.72867	0.00771447
A0A1D6FK96	Fasciclin-like arabinogalactan protein 6	ZEAMMB73_Zm00001d009566	Fasciclin-like arabinogalactan protein 6 OS=Zea mays OX=4577 GN=ZEAMMB73_Zm00001d009566 PE=4 SV=1 - [A0A1D6FK96_MAIZE]	3.49	1	1	4	258	26.2125	9.45166		0.904191	0.813825	0.859008		1.16462	1.19456	1.17959	0.728228	0.021342
C4J662	(+)-neomenthol dehydrogenase	100282122	(+)-neomenthol dehydrogenase OS=Zea mays OX=4577 GN=100282122 PE=2 SV=1 - [C4J662_MAIZE]	9.32	3	3	7	311	33.3233	5.24951	0.718518	0.817755	0.852798	0.796357	1.15892	1.07136	1.05409	1.09479	0.727406	0.00446317
A0A1D6KIX1	3-oxoacyl-reductase	ZEAMMB73_Zm00001d031453	3-oxoacyl-reductase OS=Zea mays OX=4577 GN=ZEAMMB73_Zm00001d031453 PE=3 SV=1 - [A0A1D6KIX1_MAIZE]	6.07	1	1	2	280	29.5866	9.49561	0.766365	0.792436		0.7794	1.06089	1.08264		1.07176	0.727213	0.0033541
Q5I204	Brain acid soluble protein 1	542208	Brain acid soluble protein 1 OS=Zea mays OX=4577 GN=542208 PE=2 SV=1 - [Q5I204_MAIZE]	12.09	1	3	7	364	38.2844	4.55127	0.841721		0.891881	0.866801	1.12806		1.26332	1.19569	0.724939	0.0448886
B6SSX1	Anthocyanin 5-aromatic acyltransferase		Anthocyanin 5-aromatic acyltransferase OS=Zea mays OX=4577 PE=2 SV=1 - [B6SSX1_MAIZE]	8.71	3	3	4	459	47.5712	5.70654	0.752387	0.937764	0.807425	0.832525	1.16306	1.07874	1.20348	1.14843	0.724927	0.00878872
B4FLR9	Uncharacterized protein		Uncharacterized protein OS=Zea mays OX=4577 PE=2 SV=1 - [B4FLR9_MAIZE]	13.25	2	2	6	151	15.9022	4.97021	0.814997	0.818637	0.757554	0.797063	1.00535	1.15464	1.1461	1.10203	0.723268	0.00430638
B6SVG1	ATPase 3		ATPase 3 OS=Zea mays OX=4577 PE=2 SV=1 - [B6SVG1_MAIZE]	1.83	1	1	2	493	55.5573	7.06396		0.793899	0.829942	0.811921		1.14657	1.10099	1.12378	0.722491	0.00856838
B4FU06	DNA-directed RNA polymerases II 24 kDa polypeptide	100273250	DNA-directed RNA polymerases II 24 kDa polypeptide OS=Zea mays OX=4577 GN=100273250 PE=2 SV=1 - [B4FU06_MAIZE]	16.67	3	3	9	210	24.8532	9.37842	0.897457	0.741438	0.839092	0.825996	1.03614	1.26205	1.14224	1.14681	0.720256	0.0157019
B4FWK0	Eukaryotic translation initiation factor 3 subunit D	100273610	Eukaryotic translation initiation factor 3 subunit D OS=Zea mays OX=4577 GN=100273610 PE=2 SV=1 - [B4FWK0_MAIZE]	6.38	2	4	10	580	64.8457	5.70654	0.767893	0.853691		0.810792	1.15109	1.10763		1.12936	0.717922	0.0220355
B4FUX9	Uncharacterized protein	100273359	Uncharacterized protein OS=Zea mays OX=4577 GN=100273359 PE=2 SV=1 - [B4FUX9_MAIZE]	11.8	2	2	6	178	19.7677	4.67822	0.847488	0.848102	0.781155	0.825582	1.10885	1.11338	1.22816	1.15013	0.717817	0.00194595
B6U961	60S ribosomal protein L31	100285759	60S ribosomal protein L31 OS=Zea mays OX=4577 GN=100285759 PE=2 SV=1 - [B6U961_MAIZE]	19.69	2	3	12	127	14.3607	10.0962	0.776353	0.894514	0.754231	0.808366	1.10013	1.17245	1.11596	1.12952	0.715675	0.00275269
B4FMT6	Uncharacterized protein		Uncharacterized protein OS=Zea mays OX=4577 PE=2 SV=1 - [B4FMT6_MAIZE]	7.14	1	1	2	154	16.9576	8.85107	0.78637	0.827179		0.806774	1.15596	1.10472		1.13034	0.713743	0.0100912
Q9ZR52	Casein kinase II alpha subunit	CK2	Casein kinase II alpha subunit OS=Zea mays OX=4577 GN=CK2 PE=2 SV=1 - [Q9ZR52_MAIZE]	11.71	2	3	12	333	39.2842	8.30908	0.799436	0.812268	0.899972	0.837225	1.1446	1.16425	1.21906	1.17597	0.711945	0.000935085
A0A1D6EVW0	Ribulose bisphosphate carboxylase large chain	ZEAMMB73_Zm00001d006402	Ribulose bisphosphate carboxylase large chain OS=Zea mays OX=4577 GN=ZEAMMB73_Zm00001d006402 PE=3 SV=1 - [A0A1D6EVW0_MAIZE]	5.01	1	3	12	599	67.3702	9.36377	0.739613	0.780826	0.848175	0.789538	1.12483	1.10754	1.11627	1.11622	0.707335	0.000520801
B6SMT2	Uncharacterized protein	100275045	Uncharacterized protein OS=Zea mays OX=4577 GN=100275045 PE=2 SV=1 - [B6SMT2_MAIZE]	17.39	2	2	4	115	12.5333	8.35303	0.777228	0.861364		0.819296	1.1798	1.13876		1.15928	0.706727	0.0184319
B6T0Q6	Uncharacterized protein		Uncharacterized protein OS=Zea mays OX=4577 PE=2 SV=1 - [B6T0Q6_MAIZE]	20.83	1	2	4	72	7.40389	5.021	0.821849	0.736745		0.779297	1.08218	1.12652		1.10435	0.705659	0.0211007
A0A1D6GF42	40S ribosomal protein S2-1	103625791	40S ribosomal protein S2-1 OS=Zea mays OX=4577 GN=103625791 PE=3 SV=1 - [A0A1D6GF42_MAIZE]	31.02	1	8	21	274	29.7989	10.1694	0.825359	0.835998	0.875745	0.845701	1.18383	0.994613	1.42105	1.19983	0.704849	0.0464553
A0A1D6L5P9	Peroxidase	100382459	Peroxidase OS=Zea mays OX=4577 GN=100382459 PE=3 SV=1 - [A0A1D6L5P9_MAIZE]	16.41	3	3	6	262	27.3779	4.85596	0.946052	0.761688	0.836036	0.847926	1.08078	1.31268	1.22354	1.20567	0.703284	0.0142546
B4G0V7	Alpha carbonic anhydrase 7	100280638	Alpha carbonic anhydrase 7 OS=Zea mays OX=4577 GN=100280638 PE=2 SV=1 - [B4G0V7_MAIZE]	9.03	3	3	6	277	31.2168	7.10791	0.807662	0.69719	0.896159	0.800337	1.0559	1.26192	1.09964	1.13915	0.702572	0.0163749
A0A075T3E7	Pyrabactin resistance-like protein	PYL1	Pyrabactin resistance-like protein OS=Zea mays OX=4577 GN=PYL1 PE=2 SV=1 - [A0A075T3E7_MAIZE]	15.09	2	3	13	212	22.7544	5.08447	0.768436	0.823063	0.851354	0.814284	1.15031	1.19756	1.13358	1.16048	0.701676	0.000364645
K7W6W9	Root cap-specific protein	103638108	Root cap-specific protein OS=Zea mays OX=4577 GN=103638108 PE=3 SV=1 - [K7W6W9_MAIZE]	31	4	9	28	371	41.283	8.104	0.703957	0.803132	0.824817	0.777302	1.14903	1.125	1.05007	1.10804	0.701514	0.0022659
C4J095	Uncharacterized protein		Uncharacterized protein OS=Zea mays OX=4577 PE=2 SV=1 - [C4J095_MAIZE]	5.95	2	4	11	538	62.876	7.31299	0.685627	0.790571	0.814167	0.763455	1.11077	1.05389	1.10202	1.0889	0.701128	0.00167479
A0A1D6G0W8	Putative DUF1296 domain containing family protein	103636139	Putative DUF1296 domain containing family protein OS=Zea mays OX=4577 GN=103636139 PE=4 SV=1 - [A0A1D6G0W8_MAIZE]	8.51	2	3	7	388	41.0318	6.53662	0.658481	0.874946	0.893778	0.809069	1.15365	1.19041	1.12911	1.15772	0.698844	0.0108631
B6UE00	Soluble inorganic pyrophosphatase		Soluble inorganic pyrophosphatase OS=Zea mays OX=4577 PE=2 SV=1 - [B6UE00_MAIZE]	17.76	2	4	33	214	24.2671	5.69385	0.778876	0.770863	0.756568	0.768769	1.05558	1.03467	1.21192	1.10072	0.698421	0.00414033
C0HHP5	Serine/threonine-protein phosphatase		Serine/threonine-protein phosphatase OS=Zea mays OX=4577 PE=2 SV=1 - [C0HHP5_MAIZE]	13.92	3	4	10	316	35.7398	5.45264	0.698361	0.871407	0.892043	0.820604	1.27399	1.04441	1.22611	1.1815	0.694544	0.0178729
A0A1D6FVP5	Uncharacterized protein	ZEAMMB73_Zm00001d011062	Uncharacterized protein OS=Zea mays OX=4577 GN=ZEAMMB73_Zm00001d011062 PE=4 SV=1 - [A0A1D6FVP5_MAIZE]	1.54	1	1	2	519	55.7098	6.49365		0.773455	0.810962	0.792209		1.09421	1.18702	1.14062	0.694543	0.0200187
C0PEB0	OSJNBa0006B20.20-like protein	100384408	OSJNBa0006B20.20-like protein OS=Zea mays OX=4577 GN=100384408 PE=2 SV=1 - [C0PEB0_MAIZE]	2.94	1	1	2	340	37.872	8.49951	0.77767	0.800387		0.789028	1.14698	1.12531		1.13614	0.69448	0.0020384
A0A1D6ILS7	Protein transport protein SEC31 homolog B	103633515	Protein transport protein SEC31 homolog B OS=Zea mays OX=4577 GN=103633515 PE=4 SV=1 - [A0A1D6ILS7_MAIZE]	9.76	2	9	16	1014	110.23	5.63037	0.737541	0.933725	0.704185	0.791817	1.18792	1.05392	1.18036	1.14073	0.694131	0.0140812
A0A1D6HJS1	Pyruvate dehydrogenase E1 component subunit alpha	ZEAMMB73_Zm00001d017985	Pyruvate dehydrogenase E1 component subunit alpha OS=Zea mays OX=4577 GN=ZEAMMB73_Zm00001d017985 PE=4 SV=1 - [A0A1D6HJS1_MAIZE]	35.9	1	14	51	390	42.6735	8.00146	0.877828	0.75628	0.761129	0.798412	1.04012	1.22696	1.18856	1.15188	0.693139	0.00703609
C0HHC4	Nucleoside diphosphate kinase	100381602	Nucleoside diphosphate kinase OS=Zea mays OX=4577 GN=100381602 PE=2 SV=1 - [C0HHC4_MAIZE]	22.15	3	3	13	149	16.8197	7.50342	0.855435	0.70095	0.771591	0.775992	1.04993	1.1958	1.12103	1.12226	0.691458	0.00486
B6T379	40S ribosomal protein S15		40S ribosomal protein S15 OS=Zea mays OX=4577 PE=2 SV=1 - [B6T379_MAIZE]	18.42	2	2	15	152	17.1303	10.1108	0.811012	0.98075	0.706445	0.832736	1.15905	1.19399	1.27136	1.20814	0.689274	0.0122742
A0A1D6MX78	Prefoldin subunit 3	ZEAMMB73_Zm00001d041597	Prefoldin subunit 3 OS=Zea mays OX=4577 GN=ZEAMMB73_Zm00001d041597 PE=3 SV=1 - [A0A1D6MX78_MAIZE]	22.34	3	3	6	188	20.9719	5.30029	0.846024	0.660591	0.842871	0.783162	1.04085	1.23836	1.13233	1.13718	0.688686	0.0133992
B6UER7	DNA-binding protein		DNA-binding protein OS=Zea mays OX=4577 PE=2 SV=1 - [B6UER7_MAIZE]	4.71	3	3	11	595	63.0836	11.312	0.855443	0.797211	0.827943	0.826865	1.07637	1.23962	1.28881	1.2016	0.688137	0.00484596
A0A1D6K431	Peroxidase	ZEAMMB73_Zm00001d029274	Peroxidase OS=Zea mays OX=4577 GN=ZEAMMB73_Zm00001d029274 PE=3 SV=1 - [A0A1D6K431_MAIZE]	13.73	4	4	14	335	35.7017	5.65576	0.843633	0.823345	0.744153	0.80371	1.07721	1.19813	1.24833	1.17456	0.684266	0.00330528
C0PNN6	Uncharacterized protein		Uncharacterized protein OS=Zea mays OX=4577 PE=2 SV=1 - [C0PNN6_MAIZE]	4.8	2	2	6	417	45.9556	5.41455	0.703459	0.864233		0.783846	1.13923	1.15439		1.14681	0.683501	0.0460925
B4FBD0	Endoplasmic reticulum vesicle transporter protein	100192107	Endoplasmic reticulum vesicle transporter protein OS=Zea mays OX=4577 GN=100192107 PE=2 SV=1 - [B4FBD0_MAIZE]	4.44	1	1	3	293	33.6141	7.2251	0.780065		0.83306	0.806563	1.14607		1.21637	1.18122	0.682824	0.013525
A0A1D6KZE3	Glycine-rich RNA-binding protein RZ1C	100381912	Glycine-rich RNA-binding protein RZ1C OS=Zea mays OX=4577 GN=100381912 PE=4 SV=1 - [A0A1D6KZE3_MAIZE]	8.11	2	2	5	259	28.1439	9.14404	0.705553	0.799159	0.826381	0.777031	1.14349	1.14926	1.12527	1.13934	0.682002	0.000628886
Q8W527	Methylenetetrahydrofolate dehydrogenase/methylenetetrahydrofolate cylcohydrolase isoform 2 (Fragment)		Methylenetetrahydrofolate dehydrogenase/methylenetetrahydrofolate cylcohydrolase isoform 2 (Fragment) OS=Zea mays OX=4577 PE=2 SV=1 - [Q8W527_MAIZE]	12.5	2	2	3	160	16.9239	7.91357	0.771789	0.817823		0.794806	1.09719	1.23649		1.16684	0.681162	0.0367443
C0PJB1	Uncharacterized protein		Uncharacterized protein OS=Zea mays OX=4577 PE=2 SV=1 - [C0PJB1_MAIZE]	1.22	1	1	3	574	63.626	8.01611	0.695573	0.846915	0.776449	0.772979	1.15691	1.1356	1.11648	1.13633	0.680242	0.00130589
B6THH7	Isoamyl acetate-hydrolyzing esterase	100286087	Isoamyl acetate-hydrolyzing esterase OS=Zea mays OX=4577 GN=100286087 PE=2 SV=1 - [B6THH7_MAIZE]	11.16	3	3	8	242	26.5704	5.19873	0.73503	0.768271	0.853551	0.785618	1.14535	1.18632	1.13339	1.15502	0.680176	0.000677124
A0A1D6IHH1	Protein FREE1	100279323	Protein FREE1 OS=Zea mays OX=4577 GN=100279323 PE=4 SV=1 - [A0A1D6IHH1_MAIZE]	14.81	2	2	3	162	17.8196	7.56201	0.68124	0.787238	0.914668	0.794382	1.1797	1.23488	1.09489	1.16982	0.679061	0.0088802
A0A1D6ESY7	Cytochrome b561 and DOMON domain-containing protein	ZEAMMB73_Zm00001d006111	Cytochrome b561 and DOMON domain-containing protein OS=Zea mays OX=4577 GN=ZEAMMB73_Zm00001d006111 PE=4 SV=1 - [A0A1D6ESY7_MAIZE]	6.82	1	1	6	220	22.2429	5.74463	0.816874	0.739511	0.807264	0.787883	1.15471	1.15665	1.1703	1.16055	0.678887	0.000114899
A0A1D6LEN8	MA3 domain-containing protein	100501384	MA3 domain-containing protein OS=Zea mays OX=4577 GN=100501384 PE=4 SV=1 - [A0A1D6LEN8_MAIZE]	5.97	3	4	14	720	78.8793	5.36377	0.719823	0.835765	0.753672	0.769753	1.0931	1.08855	1.22217	1.13461	0.678432	0.00281027
B4FAX1	Glycosyltransferase family 61 protein	100272910	Glycosyltransferase family 61 protein OS=Zea mays OX=4577 GN=100272910 PE=2 SV=1 - [B4FAX1_MAIZE]	1.88	1	1	5	531	58.1608	6.25244	0.699612	0.754453	0.852616	0.768894	1.17747	1.13564	1.08766	1.13359	0.678283	0.00213458
B4FUN0	Uncharacterized protein		Uncharacterized protein OS=Zea mays OX=4577 PE=2 SV=1 - [B4FUN0_MAIZE]	20.2	4	4	11	203	23.0453	6.21436	0.850209	0.605273	0.794402	0.749961	1.06083	1.19792	1.06527	1.10801	0.676855	0.0144944
B6SLR4	Small nuclear ribonucleoprotein Sm D2	100280773	Small nuclear ribonucleoprotein Sm D2 OS=Zea mays OX=4577 GN=100280773 PE=2 SV=1 - [B6SLR4_MAIZE]	18.27	2	2	9	104	12.0114	9.93506	0.702978	0.79995	0.832753	0.77856	1.10144	1.18363	1.16773	1.15093	0.676461	0.00130612
A0A1D6GNE6	Methionine aminopeptidase	100283250	Methionine aminopeptidase OS=Zea mays OX=4577 GN=100283250 PE=3 SV=1 - [A0A1D6GNE6_MAIZE]	12.59	1	4	19	286	31.4038	7.15186	0.70091	0.888956	0.73886	0.776242	1.17648	1.16047	1.11927	1.15208	0.673777	0.00329135
B6U7Y1	Activator heat shock protein ATPase	ahsa_0	Activator heat shock protein ATPase OS=Zea mays OX=4577 GN=ahsa_0 PE=2 SV=1 - [B6U7Y1_MAIZE]	6.9	3	3	8	348	38.5768	5.41455	0.752234	0.806572	0.825138	0.794648	1.11517	1.18856	1.24505	1.18293	0.671763	0.000870931
C0HFI5	ATP-dependent 6-phosphofructokinase	100857010	ATP-dependent 6-phosphofructokinase OS=Zea mays OX=4577 GN=100857010 PE=2 SV=1 - [C0HFI5_MAIZE]	9.47	2	5	20	528	57.2572	7.85498	0.799119	0.707677	0.769441	0.758745	1.10379	1.10448	1.18164	1.12997	0.671475	0.000573693
A0A1D6K136	Membrane steroid-binding protein 1	ZEAMMB73_Zm00001d028955	Membrane steroid-binding protein 1 OS=Zea mays OX=4577 GN=ZEAMMB73_Zm00001d028955 PE=3 SV=1 - [A0A1D6K136_MAIZE]	4.04	1	1	4	198	21.4946	4.41162	0.675459	0.792358	0.827009	0.764942	1.13718	1.14981	1.13477	1.14058	0.670658	0.00123265
C0P3H1	Ubiquitin carboxyl-terminal hydrolase		Ubiquitin carboxyl-terminal hydrolase OS=Zea mays OX=4577 PE=2 SV=1 - [C0P3H1_MAIZE]	3.42	1	1	2	322	37.1751	5.61768	0.785457	0.7594		0.772428	1.12933	1.17469		1.15201	0.670502	0.00471449
A0A1D6QAU6	TBC1 domain family member 22A	100286052	TBC1 domain family member 22A OS=Zea mays OX=4577 GN=100286052 PE=4 SV=1 - [A0A1D6QAU6_MAIZE]	9.22	2	2	4	293	34.5912	5.74463	0.811389	0.749977	0.74299	0.768118	0.960265	1.29557	1.18269	1.14618	0.670158	0.0199821
B7ZXN1	Ferritin		Ferritin OS=Zea mays OX=4577 PE=2 SV=1 - [B7ZXN1_MAIZE]	14.41	1	1	2	111	12.7685	5.49072	0.755915	0.821141		0.788528	1.16123	1.19744		1.17934	0.668621	0.00898738
A0A1D6N096	Zinc transporter 2	ZEAMMB73_Zm00001d041959	Zinc transporter 2 OS=Zea mays OX=4577 GN=ZEAMMB73_Zm00001d041959 PE=4 SV=1 - [A0A1D6N096_MAIZE]	4.83	2	2	4	352	37.8765	7.02002	0.68314	0.814421	0.759755	0.752439	1.07645	1.08294	1.22914	1.12951	0.666163	0.00385604
B4FB96	Late embryogenesis abundant (LEA) hydroxyproline-rich glycoprotein family	100192081	Late embryogenesis abundant (LEA) hydroxyproline-rich glycoprotein family OS=Zea mays OX=4577 GN=100192081 PE=2 SV=1 - [B4FB96_MAIZE]	8.76	2	2	6	194	21.2972	9.86182	0.713862	0.865429	0.743161	0.774151	1.12201	1.11172	1.25873	1.16415	0.66499	0.0041805
B6UIM2	40S ribosomal protein S10		40S ribosomal protein S10 OS=Zea mays OX=4577 PE=2 SV=1 - [B6UIM2_MAIZE]	12.29	1	2	8	179	20.0901	9.80322	0.731185	0.824981		0.778083	1.10437	1.23708		1.17073	0.664615	0.0402561
B6SSV0	Uncharacterized protein	100276726	Uncharacterized protein OS=Zea mays OX=4577 GN=100276726 PE=2 SV=1 - [B6SSV0_MAIZE]	5.5	1	1	2	218	22.9999	5.04639	0.716179		0.808826	0.762503	1.11995		1.18061	1.15028	0.662883	0.0197856
B6SQM0	Major pollen allergen Car b 1 isoforms 1A and 1B	100280979	Major pollen allergen Car b 1 isoforms 1A and 1B OS=Zea mays OX=4577 GN=100280979 PE=2 SV=1 - [B6SQM0_MAIZE]	18.83	2	2	4	154	16.7728	5.05908	0.702058	0.703773	0.794214	0.733348	1.02246	1.19716	1.09995	1.10652	0.662749	0.00319684
A0A1D6LBB2	G-type lectin S-receptor-like serine/threonine-protein kinase	103644303	G-type lectin S-receptor-like serine/threonine-protein kinase OS=Zea mays OX=4577 GN=103644303 PE=4 SV=1 - [A0A1D6LBB2_MAIZE]	1.06	1	1	5	852	90.8718	7.72314	0.746262	0.730795	0.849834	0.77563	1.14255	1.13643	1.23407	1.17102	0.662354	0.00127367
A0A1D6N9F5	Cytidine methyl kinase1	100282760	Cytidine methyl kinase1 OS=Zea mays OX=4577 GN=100282760 PE=4 SV=1 - [A0A1D6N9F5_MAIZE]	3.09	1	1	3	259	28.2284	9.75928	0.643907	0.772626	0.781414	0.732649	1.10095	1.08054	1.13739	1.10629	0.662256	0.00140616
C0P4E8	Nodulin-related protein 1	100382106	Nodulin-related protein 1 OS=Zea mays OX=4577 GN=100382106 PE=2 SV=1 - [C0P4E8_MAIZE]	2.29	1	1	2	437	46.5857	6.18896		0.76245	0.77052	0.766485		1.17847	1.13999	1.15923	0.661201	0.00249538
B6TI68	Nucleic acid binding protein		Nucleic acid binding protein OS=Zea mays OX=4577 PE=2 SV=1 - [B6TI68_MAIZE]	10.41	2	2	6	269	28.0263	7.21045	0.813716	0.861825	0.736259	0.803933	1.19907	1.28067	1.16912	1.21628	0.660975	0.00113343
A0A1D6HR96	Purple acid phosphatase	ZEAMMB73_Zm00001d018653	Purple acid phosphatase OS=Zea mays OX=4577 GN=ZEAMMB73_Zm00001d018653 PE=3 SV=1 - [A0A1D6HR96_MAIZE]	1.22	1	1	3	654	73.3962	6.354	0.747269		0.763366	0.755318	1.10136		1.18635	1.14385	0.660327	0.0121682
A0A1D6GHZ6	Vps51/Vps67 family (Components of vesicular transport) protein	541772	Vps51/Vps67 family (Components of vesicular transport) protein OS=Zea mays OX=4577 GN=541772 PE=4 SV=1 - [A0A1D6GHZ6_MAIZE]	3.11	2	2	5	675	76.6465	6.84424	0.932685	0.657909	0.729728	0.77344	1.05	1.24	1.24216	1.17739	0.656914	0.0178089
A0A1D6NCX6	Putative 3-hydroxyisobutyrate dehydrogenase-like 1 mitochondrial	ZEAMMB73_Zm00001d043514	Putative 3-hydroxyisobutyrate dehydrogenase-like 1 mitochondrial OS=Zea mays OX=4577 GN=ZEAMMB73_Zm00001d043514 PE=4 SV=1 - [A0A1D6NCX6_MAIZE]	5.05	2	2	5	317	32.0605	6.91748	0.762838	0.726066	0.777882	0.755595	1.0812	1.18055	1.19897	1.15357	0.655005	0.000555702
A0A1D6E3E1	Prolyl oligopeptidase family protein	103646079	Prolyl oligopeptidase family protein OS=Zea mays OX=4577 GN=103646079 PE=4 SV=1 - [A0A1D6E3E1_MAIZE]	6.35	1	1	2	126	13.5181	11.5024	0.734382	0.804407		0.769394	1.1293	1.22886		1.17908	0.652538	0.021365
B4FT75	Uncharacterized protein		Uncharacterized protein OS=Zea mays OX=4577 PE=2 SV=1 - [B4FT75_MAIZE]	8.1	2	2	7	321	37.2063	9.36377	0.666886	0.813207	0.779411	0.753168	1.14284	1.20691	1.1352	1.16165	0.64836	0.00119744
B7ZX64	Long chain acyl-CoA synthetase 1	100279270	Long chain acyl-CoA synthetase 1 OS=Zea mays OX=4577 GN=100279270 PE=2 SV=1 - [B7ZX64_MAIZE]	3.28	2	2	4	670	74.9834	7.59131	0.780309	0.720787	0.727193	0.742763	1.16152	1.10201	1.18483	1.14945	0.646189	0.00019605
C0PK64	Nucleoside diphosphate kinase		Nucleoside diphosphate kinase OS=Zea mays OX=4577 PE=2 SV=1 - [C0PK64_MAIZE]	35.19	2	6	22	162	18.0484	6.55127	0.726113	0.712377	0.79599	0.744827	1.09757	1.24086	1.12436	1.15426	0.645283	0.00130977
A0A1D6EUB1	Enoyl-CoA hydratase 2 peroxisomal	100272552	Enoyl-CoA hydratase 2 peroxisomal OS=Zea mays OX=4577 GN=100272552 PE=4 SV=1 - [A0A1D6EUB1_MAIZE]	7.27	1	1	3	110	12.4172	5.04639	0.6452	0.712236	0.778286	0.711907	1.07232	1.09265	1.15065	1.10521	0.644139	0.000945964
A0A1D6MR13	Type III polyketide synthase B	103650032	Type III polyketide synthase B OS=Zea mays OX=4577 GN=103650032 PE=3 SV=1 - [A0A1D6MR13_MAIZE]	2.01	1	1	2	398	43.3982	6.75635	0.653528	0.747325		0.700427	1.07496	1.10061		1.08779	0.6439	0.0153918
B6TXQ6	GrpE protein homolog		GrpE protein homolog OS=Zea mays OX=4577 PE=2 SV=1 - [B6TXQ6_MAIZE]	6.4	1	2	7	328	36.0342	4.64014		0.801765	0.818196	0.809981		1.22784	1.28947	1.25865	0.64353	0.00501465
C0PEY1	Orphans transcription factor	100383303	Orphans transcription factor OS=Zea mays OX=4577 GN=100383303 PE=2 SV=1 - [C0PEY1_MAIZE]	4.18	2	2	3	526	55.7624	7.10791	0.671195	0.85008		0.760637	1.21046	1.16389		1.18717	0.640713	0.0438837
A0A0H4NWV3	Reticulon-like protein		Reticulon-like protein OS=Zea mays OX=4577 PE=4 SV=1 - [A0A0H4NWV3_MAIZE]	9.95	2	2	6	221	24.3932	9.42236	0.577996	0.772783	0.709166	0.686648	1.11459	1.13681	0.965587	1.07233	0.640333	0.00800499
B4FDX5	Uncharacterized protein		Uncharacterized protein OS=Zea mays OX=4577 PE=2 SV=1 - [B4FDX5_MAIZE]	6.32	1	1	2	190	21.3027	8.35303		0.686354	0.751506	0.71893		1.18547	1.06367	1.12457	0.639294	0.0277881
B6STA5	Glycine-rich RNA-binding protein 2	ZEAMMB73_Zm00001d031168	Glycine-rich RNA-binding protein 2 OS=Zea mays OX=4577 GN=ZEAMMB73_Zm00001d031168 PE=2 SV=1 - [B6STA5_MAIZE]	61.29	3	7	47	155	15.418	6.55127	0.72352	0.976522	0.692219	0.79742	1.14296	1.26429	1.35046	1.25257	0.636627	0.0136554
A0A1D6IPI9	PWWP domain containing protein	ZEAMMB73_Zm00001d022587	PWWP domain containing protein OS=Zea mays OX=4577 GN=ZEAMMB73_Zm00001d022587 PE=4 SV=1 - [A0A1D6IPI9_MAIZE]	1.58	1	1	3	506	54.9073	5.8335	0.722107	0.779343	0.747959	0.749803	1.15363	1.12575	1.26671	1.18203	0.634334	0.000724974
A0A1D6NHA1	Transducin/WD40 repeat-like superfamily protein	100384414	Transducin/WD40 repeat-like superfamily protein OS=Zea mays OX=4577 GN=100384414 PE=4 SV=1 - [A0A1D6NHA1_MAIZE]	5.19	1	6	15	1368	145.797	6.96143	0.922601	0.885917		0.904259	1.38219	1.47007		1.42613	0.634065	0.00822135
A0A1D6QDB3	Chaperonin10	100383971	Chaperonin10 OS=Zea mays OX=4577 GN=100383971 PE=3 SV=1 - [A0A1D6QDB3_MAIZE]	4.58	1	1	3	240	24.7931	6.0874	0.674155	0.765292	0.834465	0.757971	1.16541	1.36052	1.06948	1.19847	0.632448	0.0106374
A0A1D6G762	Sister chromatid cohesion 1 protein 4	103636402	Sister chromatid cohesion 1 protein 4 OS=Zea mays OX=4577 GN=103636402 PE=4 SV=1 - [A0A1D6G762_MAIZE]	1.98	1	1	3	455	50.3024	4.44971	0.712633	0.728127	0.773914	0.738225	1.09246	1.21741	1.19703	1.16896	0.63152	0.000550919
B7ZZT5	Thymidylate kinase	103647875	Thymidylate kinase OS=Zea mays OX=4577 GN=103647875 PE=2 SV=1 - [B7ZZT5_MAIZE]	10.98	3	3	6	255	27.9664	9.01221	0.70214	0.746915	0.773207	0.740754	1.13621	1.18139	1.21434	1.17731	0.62919	0.000142212
B6T484	Mitogen-activated protein kinase	542144	Mitogen-activated protein kinase OS=Zea mays OX=4577 GN=542144 PE=2 SV=1 - [B6T484_MAIZE]	19.09	5	6	25	372	42.3065	6.53662	0.608865	0.966059	0.697528	0.757484	1.23349	1.19343	1.21977	1.21556	0.623154	0.0132576
A0A1D6M5X8	Uncharacterized protein	ZEAMMB73_Zm00001d038382	Uncharacterized protein OS=Zea mays OX=4577 GN=ZEAMMB73_Zm00001d038382 PE=4 SV=1 - [A0A1D6M5X8_MAIZE]	5.85	1	1	4	188	16.4144	8.42627	0.743101	0.825407	0.748963	0.77249	1.18368	1.24403	1.31185	1.24652	0.619716	0.000480923
A0A1D6LIJ7	Vacuolar sorting protein 39	100382909	Vacuolar sorting protein 39 OS=Zea mays OX=4577 GN=100382909 PE=4 SV=1 - [A0A1D6LIJ7_MAIZE]	1.28	1	1	3	934	103.244	5.33838	0.638358	0.797583		0.71797	1.22031	1.10808		1.1642	0.616709	0.0444904
B6T4Q9	ATP binding protein	100192758	ATP binding protein OS=Zea mays OX=4577 GN=100192758 PE=2 SV=1 - [B6T4Q9_MAIZE]	12.43	2	5	9	370	41.0395	7.29834	0.588315	0.827361	0.615191	0.676956	1.08933	1.02423	1.19195	1.10183	0.614389	0.00916357
B4F8R2	Mannan endo-14-beta-mannosidase 2	100191416	Mannan endo-14-beta-mannosidase 2 OS=Zea mays OX=4577 GN=100191416 PE=2 SV=1 - [B4F8R2_MAIZE]	1.55	1	1	2	453	50.9036	7.45947	0.666541	0.735332		0.700936	1.14445	1.14829		1.14637	0.61144	0.00592809
A0A1D6QEK1	p-loop containing nucleoside triphosphate hydrolase superfamily protein	ZEAMMB73_Zm00001d052248	p-loop containing nucleoside triphosphate hydrolase superfamily protein OS=Zea mays OX=4577 GN=ZEAMMB73_Zm00001d052248 PE=4 SV=1 - [A0A1D6QEK1_MAIZE]	3.41	2	2	4	734	82.4106	5.5542	0.743356	0.620795		0.682076	1.06757	1.18146		1.12452	0.60655	0.033941
A0A1D6JNY8	4-coumarate--CoA ligase-like 7	100191850	4-coumarate--CoA ligase-like 7 OS=Zea mays OX=4577 GN=100191850 PE=4 SV=1 - [A0A1D6JNY8_MAIZE]	5.07	1	2	3	276	30.2333	7.6792	0.63579		0.825986	0.730888	1.22066		1.21502	1.21784	0.600153	0.036118
A0A1D6Q072	Uncharacterized protein	ZEAMMB73_Zm00001d050168	Uncharacterized protein OS=Zea mays OX=4577 GN=ZEAMMB73_Zm00001d050168 PE=4 SV=1 - [A0A1D6Q072_MAIZE]	8.92	1	1	3	157	15.5321	10.1401	0.699649	0.739522	0.712793	0.717321	1.12922	1.17984	1.30658	1.20521	0.595182	0.000833401
B6SLS5	Nuclear speckle RNA-binding protein A	100274945	Nuclear speckle RNA-binding protein A OS=Zea mays OX=4577 GN=100274945 PE=2 SV=1 - [B6SLS5_MAIZE]	8.25	1	1	2	97	10.3791	11.1948	0.72186	0.760512		0.741186	1.22279	1.27357		1.24818	0.593812	0.00393796
A0A1D6LKP7	Root cap protein1	ZEAMMB73_Zm00001d036091	Root cap protein1 OS=Zea mays OX=4577 GN=ZEAMMB73_Zm00001d036091 PE=3 SV=1 - [A0A1D6LKP7_MAIZE]	17.77	2	7	26	377	41.8082	7.43018	0.692677	0.719151	0.728797	0.713542	1.14335	1.27342	1.21433	1.21036	0.589526	0.000221387
B4FV46	Protein RALF-like 33	100276849	Protein RALF-like 33 OS=Zea mays OX=4577 GN=100276849 PE=2 SV=1 - [B4FV46_MAIZE]	22.12	2	2	4	113	11.709	8.85107	0.693729	0.671608		0.682669	1.18777	1.14296		1.16537	0.585798	0.0026692
A0A1D6DXG8	Eukaryotic translation initiation factor 3 subunit C	ZEAMMB73_Zm00001d002169	Eukaryotic translation initiation factor 3 subunit C OS=Zea mays OX=4577 GN=ZEAMMB73_Zm00001d002169 PE=3 SV=1 - [A0A1D6DXG8_MAIZE]	11.91	1	10	27	915	104.527	5.5542	0.589206	0.736577	0.686961	0.670915	1.19755	1.21661	1.02456	1.14624	0.585317	0.00315382
C0PFY0	ATP-dependent Clp protease proteolytic subunit	100284211	ATP-dependent Clp protease proteolytic subunit OS=Zea mays OX=4577 GN=100284211 PE=2 SV=1 - [C0PFY0_MAIZE]	5.79	1	2	9	259	27.7461	6.60986	0.544355	0.736892	0.79836	0.693202	1.19087	1.2265	1.16338	1.19358	0.580774	0.00313061
B4FBH2	Uncharacterized protein		Uncharacterized protein OS=Zea mays OX=4577 PE=2 SV=1 - [B4FBH2_MAIZE]	7.61	1	1	6	92	9.78419	10.4038	0.807398	0.667834	0.605079	0.693437	1.10089	1.281	1.22901	1.20364	0.576119	0.00313649
A0A1D6HTK2	Peptidyl-prolyl cis-trans isomerase CYP63	100274576	Peptidyl-prolyl cis-trans isomerase CYP63 OS=Zea mays OX=4577 GN=100274576 PE=4 SV=1 - [A0A1D6HTK2_MAIZE]	2.78	2	2	10	648	71.1176	10.4478	0.628626	0.76	0.650955	0.67986	1.10042	1.18151	1.26472	1.18221	0.575074	0.00129451
B4F975	PIF/Ping-Pong transposase family protein	100191551	PIF/Ping-Pong transposase family protein OS=Zea mays OX=4577 GN=100191551 PE=2 SV=1 - [B4F975_MAIZE]	2.11	1	1	5	568	61.0814	7.28369	0.706995	0.730644	0.548346	0.661995	1.0348	1.10004	1.32708	1.15397	0.573666	0.00955363
A0A1D6MF07	VHS domain-containing protein	103649541	VHS domain-containing protein OS=Zea mays OX=4577 GN=103649541 PE=4 SV=1 - [A0A1D6MF07_MAIZE]	2.26	2	2	4	664	71.8645	5.45264	0.551487	0.941709	0.592679	0.695292	1.22025	1.07228	1.36361	1.21872	0.570512	0.0249495
A0A1D6ECC4	Zinc finger CCCH domain-containing protein 41	ZEAMMB73_Zm00001d003922	Zinc finger CCCH domain-containing protein 41 OS=Zea mays OX=4577 GN=ZEAMMB73_Zm00001d003922 PE=4 SV=1 - [A0A1D6ECC4_MAIZE]	0.87	1	1	2	916	98.6629	8.36768		0.789789	0.638393	0.714091		1.18871	1.32273	1.25572	0.568672	0.0331192
A0A317YB68	RPM1-interacting protein 4	Zm00014a_031591	RPM1-interacting protein 4 OS=Zea mays OX=4577 GN=Zm00014a_031591 PE=4 SV=1 - [A0A317YB68_MAIZE]	3.64	1	1	2	220	23.5182	9.08545		0.698713	0.683576	0.691144		1.21358	1.21968	1.21663	0.568081	0.000240996
O48554	Glycine-rich RNA binding protein	GRP	Glycine-rich RNA binding protein OS=Zea mays OX=4577 GN=GRP PE=2 SV=1 - [O48554_MAIZE]	45.52	2	5	30	145	14.7188	6.11279	0.621372	0.81301		0.717191	1.29531	1.23222		1.26377	0.567503	0.0324168
A0A1D6MX14	Ankyrin repeat family protein	ZEAMMB73_Zm00001d041589	Ankyrin repeat family protein OS=Zea mays OX=4577 GN=ZEAMMB73_Zm00001d041589 PE=4 SV=1 - [A0A1D6MX14_MAIZE]	5.6	1	1	2	125	13.4188	6.1001	0.679253		0.700841	0.690047	1.14128		1.30146	1.22137	0.564979	0.0223606
A0A1D6P6X6	Expansin-B4	ZEAMMB73_Zm00001d047091	Expansin-B4 OS=Zea mays OX=4577 GN=ZEAMMB73_Zm00001d047091 PE=3 SV=1 - [A0A1D6P6X6_MAIZE]	6.96	1	2	6	273	29.6673	9.5542	0.593942	0.764778		0.67936	1.25556	1.16905		1.2123	0.560389	0.0307931
A0A1D6MLW6	Putative calcium-binding protein CML27	103649813	Putative calcium-binding protein CML27 OS=Zea mays OX=4577 GN=103649813 PE=4 SV=1 - [A0A1D6MLW6_MAIZE]	10.26	1	2	6	195	20.4805	4.62744	0.611412	0.679394	0.613464	0.634757	1.05106	1.24956	1.18462	1.16175	0.546382	0.00108701
A0A1D6I9P7	Hexosyltransferase	100192958	Hexosyltransferase OS=Zea mays OX=4577 GN=100192958 PE=3 SV=1 - [A0A1D6I9P7_MAIZE]	2.23	1	1	2	537	60.8653	9.05615	0.59862		0.689305	0.643962	1.22517		1.16977	1.19747	0.537768	0.00908984
A0A1D6P1L1	K(+) efflux antiporter 4	ZEAMMB73_Zm00001d046231	K(+) efflux antiporter 4 OS=Zea mays OX=4577 GN=ZEAMMB73_Zm00001d046231 PE=4 SV=1 - [A0A1D6P1L1_MAIZE]	3.17	1	1	2	441	46.4344	5.59229	0.563557	0.69073		0.627144	1.19097	1.17856		1.18476	0.529342	0.0128742
B4FVF9	CCAAT-DR1 transcription factor	CADR15	CCAAT-DR1 transcription factor OS=Zea mays OX=4577 GN=CADR15 PE=2 SV=1 - [B4FVF9_MAIZE]	6.11	1	1	3	180	19.0572	6.78564	0.610678	0.639993	0.674542	0.641737	1.09442	1.25789	1.33166	1.22799	0.522591	0.00127002
A0A1D6LVH7	Protein EXORDIUM	ZEAMMB73_Zm00001d037205	Protein EXORDIUM OS=Zea mays OX=4577 GN=ZEAMMB73_Zm00001d037205 PE=4 SV=1 - [A0A1D6LVH7_MAIZE]	2.98	1	1	4	336	34.3133	8.35303		0.706719	0.674707	0.690713		1.38337	1.28506	1.33421	0.517694	0.00639182
B8A090	ADP,ATP carrier protein 2, mitochondrial	ZEAMMB73_Zm00001d051685	ADP,ATP carrier protein 2, mitochondrial OS=Zea mays OX=4577 GN=ZEAMMB73_Zm00001d051685 PE=2 SV=1 - [B8A090_MAIZE]	23.51	1	10	118	387	42.3057	9.84717	0.636661		0.666199	0.65143	1.22145		1.40704	1.31424	0.495669	0.0195088
B4FQD7	60S ribosomal protein L27a-2		60S ribosomal protein L27a-2 OS=Zea mays OX=4577 PE=2 SV=1 - [B4FQD7_MAIZE]	33.1	6	6	39	145	16.0678	10.6821	0.549232	0.596521	0.651697	0.59915	1.20109	1.3252	1.14253	1.22294	0.489927	0.000530432
A0A317Y6J6	La-related protein 1B	Zm00014a_030681	La-related protein 1B OS=Zea mays OX=4577 GN=Zm00014a_030681 PE=4 SV=1 - [A0A317Y6J6_MAIZE]	2.12	1	1	2	472	49.1877	9.17334	0.580711		0.642301	0.611506	1.18989		1.31292	1.25141	0.488655	0.0113607
A0A1D6QV98	Senescence-associated protein DIN1	100281897	Senescence-associated protein DIN1 OS=Zea mays OX=4577 GN=100281897 PE=4 SV=1 - [A0A1D6QV98_MAIZE]	7.14	1	1	2	98	10.6683	6.50732		0.6318	0.676403	0.654102		1.19563	1.49042	1.34302	0.487038	0.0437718
A0A317Y4V1	Expansin-B4	EXPB4_1	Expansin-B4 OS=Zea mays OX=4577 GN=EXPB4_1 PE=3 SV=1 - [A0A317Y4V1_MAIZE]	9.02	2	3	9	266	29.4994	8.79248	0.510074	0.693417	0.671593	0.625028	1.32075	1.21502	1.32085	1.28554	0.486199	0.000619112
A0A1D6GS15	UTP:RNA uridylyltransferase 1	103626268	UTP:RNA uridylyltransferase 1 OS=Zea mays OX=4577 GN=103626268 PE=4 SV=1 - [A0A1D6GS15_MAIZE]	2.06	1	1	5	388	43.6756	8.1626	0.447636	0.641954	0.603306	0.564299	1.26601	1.00817	1.32347	1.19922	0.470556	0.00504297
B6SRA0	Uncharacterized protein		Uncharacterized protein OS=Zea mays OX=4577 PE=2 SV=1 - [B6SRA0_MAIZE]	24.14	1	1	3	58	6.31506	8.60205	0.531457	0.630664	0.701765	0.621295	1.66325	1.20184	1.11009	1.32506	0.46888	0.0168089
B8A0H2	Uncharacterized protein		Uncharacterized protein OS=Zea mays OX=4577 PE=2 SV=1 - [B8A0H2_MAIZE]	2.33	1	1	2	300	32.9108	4.53857		0.605072	0.555577	0.580324		1.25742	1.34164	1.29953	0.446564	0.00458081
P80616	Probable S-adenosylmethionine synthase (Fragment)	METK	Probable S-adenosylmethionine synthase (Fragment) OS=Zea mays OX=4577 GN=METK PE=1 SV=1 - [METK_MAIZE]	100	1	1	4	15	1.59971	4.7417	0.862795	0.884091	0.968507	0.905131	1.05528	1.09222	1.05858	1.06869	0.846951	0.00891136
B4G0K5	Uncharacterized protein		Uncharacterized protein OS=Zea mays OX=4577 PE=2 SV=1 - [B4G0K5_MAIZE]	69.77	14	21	141	344	38.3706	6.80029	1.04137	1.01673	1.10829	1.05546	0.929963	0.924957	0.905852	0.920258	1.14692	0.00881742
A0A1Q0YML2	Glyceraldehyde-3-phosphate dehydrogenase	ZEAMMB73_Zm00001d051001	Glyceraldehyde-3-phosphate dehydrogenase OS=Zea mays OX=4577 GN=ZEAMMB73_Zm00001d051001 PE=3 SV=1 - [A0A1Q0YML2_MAIZE]	60.53	11	20	133	337	36.4258	7.47412	1.05393	1.14256	1.12574	1.10741	1.04739	0.931204	0.900672	0.959756	1.15385	0.0476975
A0A317Y5T2	Proteasome subunit alpha type	PAE1_1	Proteasome subunit alpha type OS=Zea mays OX=4577 GN=PAE1_1 PE=3 SV=1 - [A0A317Y5T2_MAIZE]	55.65	10	10	29	230	25.4368	4.84326	0.956743	0.93576	0.933075	0.941859	1.01776	1.09132	1.01919	1.04276	0.90324	0.0165343
B4G080	Caffeoyl-CoA O-methyltransferase 1		Caffeoyl-CoA O-methyltransferase 1 OS=Zea mays OX=4577 PE=2 SV=1 - [B4G080_MAIZE]	52.82	8	9	67	248	27.3021	5.2749	0.961702	0.944079	0.961167	0.95565	1.01342	1.04716	1.05732	1.0393	0.919512	0.00445418
B6SMC7	40S ribosomal protein S29	100280803	40S ribosomal protein S29 OS=Zea mays OX=4577 GN=100280803 PE=2 SV=1 - [B6SMC7_MAIZE]	50	3	3	14	56	6.42412	9.90576	1.07548	1.12203	1.07915	1.09222	1.01775	0.929695	0.922078	0.956507	1.14189	0.01647
B6UE23	60S ribosomal protein L18a		60S ribosomal protein L18a OS=Zea mays OX=4577 PE=2 SV=1 - [B6UE23_MAIZE]	47.19	3	9	46	178	21.4591	10.6089	0.864239	0.893112	0.926725	0.894692	1.10902	1.04321	0.959602	1.03728	0.862537	0.0382821
A0A317Y448	Nucleoside diphosphate kinase 1	NDPK1	Nucleoside diphosphate kinase 1 OS=Zea mays OX=4577 GN=NDPK1 PE=3 SV=1 - [A0A317Y448_MAIZE]	46.98	6	6	53	149	16.5306	6.80029	0.95063	0.930566	0.961896	0.947697	1.03214	1.16804	1.04091	1.08036	0.877204	0.0416604
B6SIL7	Eukaryotic translation initiation factor 5A	ZEAMMB73_Zm00001d006760	Eukaryotic translation initiation factor 5A OS=Zea mays OX=4577 GN=ZEAMMB73_Zm00001d006760 PE=2 SV=1 - [B6SIL7_MAIZE]	46.25	6	8	51	160	17.4857	5.98584	1.12805	1.14211	1.13508	1.13508	0.950901	1.02073	0.919087	0.963574	1.17799	0.00479803
B8A068	S-adenosylmethionine synthase	100279822	S-adenosylmethionine synthase OS=Zea mays OX=4577 GN=100279822 PE=2 SV=1 - [B8A068_MAIZE]	44.33	7	14	101	397	43.0458	5.90967	1.16557	1.09059	1.04939	1.10185	0.966908	0.990483	0.934398	0.96393	1.14308	0.0215963
A0A1D6E530	Peroxidase	ZEAMMB73_Zm00001d002899	Peroxidase OS=Zea mays OX=4577 GN=ZEAMMB73_Zm00001d002899 PE=3 SV=1 - [A0A1D6E530_MAIZE]	44.21	9	9	70	337	35.4539	5.66846	0.928312	0.895287	0.943125	0.922241	1.03063	1.02866	1.06346	1.04092	0.885988	0.00279356
B6U726	Vesicle-associated membrane protein 711	ZEAMMB73_Zm00001d037483	Vesicle-associated membrane protein 711 OS=Zea mays OX=4577 GN=ZEAMMB73_Zm00001d037483 PE=2 SV=1 - [B6U726_MAIZE]	43.44	6	7	16	221	24.894	9.48096	0.948691	0.963463	0.914701	0.942285	1.01945	1.06667	1.07728	1.05447	0.89361	0.00804752
Q9LKL4	Lipoxygenase	LOX	Lipoxygenase OS=Zea mays OX=4577 GN=LOX PE=2 SV=1 - [Q9LKL4_MAIZE]	42.38	26	34	187	873	98.1024	6.7124	1.04894	1.03121	1.06663	1.04893	0.921803	0.875273	0.92514	0.907405	1.15596	0.00175904
B6TS22	O-methyltransferase ZRP4	100284287	O-methyltransferase ZRP4 OS=Zea mays OX=4577 GN=100284287 PE=2 SV=1 - [B6TS22_MAIZE]	41.24	13	14	86	354	39.1582	5.80811	0.986365	0.986092	0.986509	0.986322	1.00744	1.00243	1.02717	1.01235	0.974293	0.0261633
B6T9C0	Putative ATPase, V1 complex, subunit B protein isoform 1	100282598	Putative ATPase, V1 complex, subunit B protein isoform 1 OS=Zea mays OX=4577 GN=100282598 PE=2 SV=1 - [B6T9C0_MAIZE]	40.66	18	18	108	487	54.0275	5.18604	0.97885	0.963904	0.95035	0.964368	1.00973	1.07301	1.08017	1.0543	0.914697	0.0195822
A0A1D6NV83	Proteasome subunit beta	100194311	Proteasome subunit beta OS=Zea mays OX=4577 GN=100194311 PE=3 SV=1 - [A0A1D6NV83_MAIZE]	39.82	8	8	40	226	24.4051	8.23584	0.899712	0.898157	0.951281	0.916383	1.05386	1.04406	0.997092	1.03167	0.888251	0.00957652
B6SHY0	ATOZI1	100284990	ATOZI1 OS=Zea mays OX=4577 GN=100284990 PE=2 SV=1 - [B6SHY0_MAIZE]	38.46	3	3	20	78	8.55631	8.79248	1.15899	1.05504	1.03232	1.08211	0.939873	0.981699	0.950436	0.957336	1.13034	0.0381757
B6TRR4	60S ribosomal protein L36		60S ribosomal protein L36 OS=Zea mays OX=4577 PE=2 SV=1 - [B6TRR4_MAIZE]	37.84	1	6	22	148	16.2381	11.0923	1.13072	1.08939	1.10242	1.10751	0.996612	0.993795	0.940199	0.976869	1.13373	0.00405759
A0A1D6MQ48	Transcription factor Pur-alpha 1	100274069	Transcription factor Pur-alpha 1 OS=Zea mays OX=4577 GN=100274069 PE=4 SV=1 - [A0A1D6MQ48_MAIZE]	36.61	2	5	8	183	20.066	5.56689	1.07163	1.04966	1.10897	1.07675	0.959559	0.994917	0.915903	0.956793	1.12538	0.0138705
C0PE62	Uncharacterized protein		Uncharacterized protein OS=Zea mays OX=4577 PE=2 SV=1 - [C0PE62_MAIZE]	36.21	4	4	22	116	13.0069	5.05908	0.956092	0.974246	0.954845	0.961728	1.03962	1.001	1.08032	1.04031	0.92446	0.029654
B6UCD2	Uncharacterized protein		Uncharacterized protein OS=Zea mays OX=4577 PE=2 SV=1 - [B6UCD2_MAIZE]	35.87	3	3	9	92	10.4532	6.13818	0.894945	0.990012	0.878339	0.921098	1.07793	1.07764	1.04963	1.0684	0.862129	0.0149985
B4FY74	Alpha/beta-Hydrolases superfamily protein	103653383	Alpha/beta-Hydrolases superfamily protein OS=Zea mays OX=4577 GN=103653383 PE=2 SV=1 - [B4FY74_MAIZE]	35.61	8	8	34	264	28.6386	6.78564	0.868673	0.973409	0.892166	0.911416	1.029	1.12162	1.12482	1.09181	0.834773	0.0156058
A0A1D6F844	NAD(P)-binding Rossmann-fold superfamily protein	103648195	NAD(P)-binding Rossmann-fold superfamily protein OS=Zea mays OX=4577 GN=103648195 PE=4 SV=1 - [A0A1D6F844_MAIZE]	34.87	8	8	60	261	27.0719	7.92822	0.989512	0.967842	0.976846	0.978067	1.19332	1.1593	1.02358	1.1254	0.869085	0.0477809
O22424	40S ribosomal protein S4	RPS4	40S ribosomal protein S4 OS=Zea mays OX=4577 GN=RPS4 PE=2 SV=1 - [RS4_MAIZE]	34.34	2	9	86	265	29.9982	10.1548	0.908168	0.928763	0.980819	0.93925	1.07367	1.10542	1.03569	1.07159	0.876498	0.0110109
B4FMV6	Soluble inorganic pyrophosphatase 1	100272302	Soluble inorganic pyrophosphatase 1 OS=Zea mays OX=4577 GN=100272302 PE=2 SV=1 - [B4FMV6_MAIZE]	34.23	1	3	29	111	12.9135	5.12256	0.954115	0.911784	0.943747	0.936548	1.04612	1.10205	1.04278	1.06365	0.880506	0.00529004
B6UBZ9	Cytochrome b-c1 complex subunit 7	100383274	Cytochrome b-c1 complex subunit 7 OS=Zea mays OX=4577 GN=100383274 PE=2 SV=1 - [B6UBZ9_MAIZE]	34.13	2	4	26	126	14.7917	9.64209	0.865368	0.895004	0.863466	0.874613	0.963314	1.06957	1.03239	1.02176	0.855989	0.010895
B4FBM9	60S ribosomal protein L3	100192516	60S ribosomal protein L3 OS=Zea mays OX=4577 GN=100192516 PE=2 SV=1 - [B4FBM9_MAIZE]	33.68	15	15	96	389	44.5238	10.1108	1.11899	1.05605	1.11943	1.09816	0.967297	0.966577	0.834558	0.922811	1.19001	0.0230358
B4FNC9	Small ubiquitin-related modifier	100281934	Small ubiquitin-related modifier OS=Zea mays OX=4577 GN=100281934 PE=2 SV=1 - [B4FNC9_MAIZE]	33.33	3	3	13	99	10.9243	5.09717	0.909436	0.888893	0.902881	0.900403	1.01545	1.12847	1.08798	1.0773	0.835794	0.0062413
A0A1D6HL75	Ferredoxin--nitrite reductase chloroplastic	ZEAMMB73_Zm00001d018161	Ferredoxin--nitrite reductase chloroplastic OS=Zea mays OX=4577 GN=ZEAMMB73_Zm00001d018161 PE=4 SV=1 - [A0A1D6HL75_MAIZE]	32.84	6	16	59	606	67.3759	8.45557	1.07963	1.05832	1.06012	1.06603	0.935223	0.913971	0.917056	0.922083	1.1561	0.000111243
B4FCE2	Uncharacterized protein		Uncharacterized protein OS=Zea mays OX=4577 PE=2 SV=1 - [B4FCE2_MAIZE]	32.75	1	6	19	284	30.5808	7.34229		0.887436	0.909258	0.898347		1.06495	1.06765	1.0663	0.842489	0.00425707
B6TAJ3	Proteasome subunit alpha type	100282706	Proteasome subunit alpha type OS=Zea mays OX=4577 GN=100282706 PE=2 SV=1 - [B6TAJ3_MAIZE]	32.48	9	9	23	274	29.9969	5.2749	1.03282	1.13579	1.08917	1.08593	1.01984	0.919682	0.888297	0.942605	1.15205	0.0445667
A0A1D6GFP8	40S ribosomal protein S18	100273341	40S ribosomal protein S18 OS=Zea mays OX=4577 GN=100273341 PE=3 SV=1 - [A0A1D6GFP8_MAIZE]	32.31	1	4	50	130	15.1099	9.83252	1.10949	1.07977	1.10062	1.09663	0.946	0.993403	0.946059	0.96182	1.14016	0.00172942
B6TRC0	Gibberellin receptor GID1L2		Gibberellin receptor GID1L2 OS=Zea mays OX=4577 PE=2 SV=1 - [B6TRC0_MAIZE]	31.8	8	8	21	327	35.5685	5.30029	0.880164	0.96412	0.987751	0.944012	1.06629	1.04084	1.04112	1.04942	0.899559	0.0353185
B4F980	Uncharacterized protein	100191555	Uncharacterized protein OS=Zea mays OX=4577 GN=100191555 PE=2 SV=1 - [B4F980_MAIZE]	31.73	3	3	20	104	12.4754	8.45557	0.972764	0.904438	0.919054	0.932086	0.993871	1.13597	1.07503	1.06829	0.872501	0.0417874
A0A1D6HN61	Leucine aminopeptidase 2 chloroplastic	ZEAMMB73_Zm00001d018370	Leucine aminopeptidase 2 chloroplastic OS=Zea mays OX=4577 GN=ZEAMMB73_Zm00001d018370 PE=3 SV=1 - [A0A1D6HN61_MAIZE]	31.54	13	14	46	596	61.839	7.72314	1.19809	1.12739	1.07955	1.13501	0.947232	0.949756	1.03421	0.977065	1.16165	0.0242377
B4F9T3	Uncharacterized protein		Uncharacterized protein OS=Zea mays OX=4577 PE=2 SV=1 - [B4F9T3_MAIZE]	30.23	7	7	26	311	33.2459	5.75732	0.926278	0.888912	0.939679	0.91829	1.0669	1.02739	1.0979	1.06406	0.863004	0.00459069
B6TF80	Germin-like protein subfamily 3 member 2		Germin-like protein subfamily 3 member 2 OS=Zea mays OX=4577 PE=2 SV=1 - [B6TF80_MAIZE]	30.17	6	6	23	232	24.3355	6.68311	0.911739	1.00168	0.926612	0.946677	1.0192	1.02875	1.04125	1.02973	0.919343	0.0437514
A0A1D6PUL7	Aconitate hydratase	100216599	Aconitate hydratase OS=Zea mays OX=4577 GN=100216599 PE=3 SV=1 - [A0A1D6PUL7_MAIZE]	29.24	19	25	113	903	98.3447	6.16357	1.13021	1.0706	1.03452	1.07844	0.966713	0.968264	0.934224	0.9564	1.12761	0.015295
B6UG51	Cytochrome b5 isoform E	ZEAMMB73_Zm00001d032442	Cytochrome b5 isoform E OS=Zea mays OX=4577 GN=ZEAMMB73_Zm00001d032442 PE=2 SV=1 - [B6UG51_MAIZE]	29.1	3	3	6	134	14.8284	5.30029	1.09705	1.13025	1.04406	1.09045	0.926135	0.882102	1.00932	0.939187	1.16106	0.0281827
B6SXW8	RuBisCO large subunit-binding protein subunit alpha	RUBA_0	RuBisCO large subunit-binding protein subunit alpha OS=Zea mays OX=4577 GN=RUBA_0 PE=2 SV=1 - [B6SXW8_MAIZE]	28.42	14	14	51	584	61.3618	5.2876	0.947808	0.992827	0.976469	0.972368	1.07534	1.06212	1.0567	1.06472	0.91326	0.0029392
B4FQS9	Trans-cinnamate 4-monooxygenase	100272801	Trans-cinnamate 4-monooxygenase OS=Zea mays OX=4577 GN=100272801 PE=2 SV=1 - [B4FQS9_MAIZE]	27.94	7	12	50	501	56.949	8.86572	1.05272	1.03272	1.1517	1.07904	0.93558	0.979355	0.8613	0.925412	1.16602	0.0380956
B4G286	40S ribosomal protein S18		40S ribosomal protein S18 OS=Zea mays OX=4577 PE=2 SV=1 - [B4G286_MAIZE]	27.63	1	4	43	152	17.6975	10.7407	1.11606	1.09616	1.17203	1.12808	1.03946	1.01844	1.04967	1.03586	1.08903	0.0197107
A0A1D6I6T8	Heat shock protein 90-2	100272368	Heat shock protein 90-2 OS=Zea mays OX=4577 GN=100272368 PE=3 SV=1 - [A0A1D6I6T8_MAIZE]	27.04	1	18	116	699	80.2239	5.10986	1.17853	1.11189	1.10905	1.13316	0.936393	0.950467	1.03393	0.973597	1.16389	0.0136739
B4FVB2	Elongation factor Tu	100273405	Elongation factor Tu OS=Zea mays OX=4577 GN=100273405 PE=2 SV=1 - [B4FVB2_MAIZE]	26.77	7	11	27	452	48.4533	6.55127	1.01081	1.12493	1.07504	1.07026	0.972615	0.868664	0.864854	0.902044	1.18649	0.0253615
B4FZU9	Dihydropyrimidine dehydrogenase (NADP(+)) chloroplastic	100274265	Dihydropyrimidine dehydrogenase (NADP(+)) chloroplastic OS=Zea mays OX=4577 GN=100274265 PE=2 SV=1 - [B4FZU9_MAIZE]	26.51	10	10	36	415	45.6441	6.45557	0.921783	0.97291	0.987	0.960564	1.01385	1.02288	1.02588	1.02087	0.940929	0.0401697
B4G1W8	Myosin-like protein	100283029	Myosin-like protein OS=Zea mays OX=4577 GN=100283029 PE=2 SV=1 - [B4G1W8_MAIZE]	26.29	8	8	17	350	39.9223	6.22705	0.908763	0.908259	0.951776	0.922933	1.04615	1.06605	1.05205	1.05475	0.875024	0.00107005
B4FNF9	Putative aldo-keto reductase 4	100191240	Putative aldo-keto reductase 4 OS=Zea mays OX=4577 GN=100191240 PE=2 SV=1 - [B4FNF9_MAIZE]	26.23	6	7	21	324	35.6164	7.98682	0.883137	0.888602	0.951381	0.907707	1.04291	1.01872	1.05654	1.03939	0.873309	0.00581342
B6T856	L-lactate dehydrogenase	100282503	L-lactate dehydrogenase OS=Zea mays OX=4577 GN=100282503 PE=2 SV=1 - [B6T856_MAIZE]	26.2	8	8	28	355	38.373	7.02002	0.916011	0.965559	0.973196	0.951588	1.06775	1.09249	1.00372	1.05465	0.902277	0.0321041
B4FLX3	Uncharacterized conserved protein UCP022280	100276044	Uncharacterized conserved protein UCP022280 OS=Zea mays OX=4577 GN=100276044 PE=2 SV=1 - [B4FLX3_MAIZE]	26.17	3	3	6	107	12.0603	9.53955	0.969143	0.8648	0.965375	0.933106	1.02351	1.04049	1.0673	1.04377	0.893979	0.0386176
D2JSQ3	ATP synthase subunit 8	atp8	ATP synthase subunit 8 OS=Zea mays OX=4577 GN=atp8 PE=2 SV=1 - [D2JSQ3_MAIZE]	26.14	4	4	16	153	17.7983	9.84717	0.826967	0.997947	0.930349	0.918421	1.07058	1.07153	1.08932	1.07715	0.852643	0.0338944
A0A1D6GGM2	Retrovirus-related Pol polyprotein LINE-1	ZEAMMB73_Zm00001d013223	Retrovirus-related Pol polyprotein LINE-1 OS=Zea mays OX=4577 GN=ZEAMMB73_Zm00001d013223 PE=4 SV=1 - [A0A1D6GGM2_MAIZE]	25.81	3	3	12	124	13.8493	7.15186	0.982758	0.968568	0.978709	0.976678	1.01227	1.03711	1.03212	1.02717	0.950848	0.00435221
A0A1D6QPU0	Phosphoenolpyruvate carboxylase isoform 1	ZEAMMB73_Zm00001d053453	Phosphoenolpyruvate carboxylase isoform 1 OS=Zea mays OX=4577 GN=ZEAMMB73_Zm00001d053453 PE=3 SV=1 - [A0A1D6QPU0_MAIZE]	25.69	2	21	123	864	98.4466	6.58057	1.13802	1.0799	1.06087	1.09293	0.950146	0.978018	0.914676	0.947614	1.15335	0.00796302
A0A1D6H4H8	26S protease regulatory subunit 6B-like protein	100284233	26S protease regulatory subunit 6B-like protein OS=Zea mays OX=4577 GN=100284233 PE=3 SV=1 - [A0A1D6H4H8_MAIZE]	25.68	7	9	27	405	45.3264	6.07471	1.1243	1.11378	1.07404	1.10404	0.933339	0.954539	0.963671	0.950516	1.16152	0.000982317
K7VCN7	Uncharacterized protein	103636535	Uncharacterized protein OS=Zea mays OX=4577 GN=103636535 PE=4 SV=1 - [K7VCN7_MAIZE]	25	2	2	7	68	7.99415	9.40771	0.912893	0.964219	0.898994	0.925369	1.03065	1.04521	1.09825	1.05804	0.874609	0.00968826
A0A1D6EL68	ADP-ribosylation factor A1F	100280562	ADP-ribosylation factor A1F OS=Zea mays OX=4577 GN=100280562 PE=3 SV=1 - [A0A1D6EL68_MAIZE]	25	4	4	26	172	19.5822	7.50342	0.902406	0.950825	0.978102	0.943778	1.05326	1.02421	1.02572	1.0344	0.912395	0.0196755
C4J629	Uncharacterized protein		Uncharacterized protein OS=Zea mays OX=4577 PE=2 SV=1 - [C4J629_MAIZE]	24.85	8	8	24	342	35.3024	8.48486	0.837903	0.998432	0.933356	0.92323	1.0996	1.10286	1.047	1.08316	0.852352	0.0329616
A0A1D6ESS5	Proteasome subunit beta type	100286342	Proteasome subunit beta type OS=Zea mays OX=4577 GN=100286342 PE=4 SV=1 - [A0A1D6ESS5_MAIZE]	24.71	4	4	14	174	19.3028	7.23975	0.934231	0.879234	0.95632	0.923262	0.996146	1.11344	1.073	1.06086	0.870295	0.0291351
B6T3V1	Peroxidase	100282124	Peroxidase OS=Zea mays OX=4577 GN=100282124 PE=2 SV=1 - [B6T3V1_MAIZE]	24.62	6	6	43	333	35.665	8.17725	1.17984	1.16378	1.07234	1.13866	0.95481	0.995775	0.987711	0.979432	1.16257	0.0112103
B4FQI3	NADH dehydrogenase [ubiquinone] 1 alpha subcomplex subunit 13-A	100282224	NADH dehydrogenase [ubiquinone] 1 alpha subcomplex subunit 13-A OS=Zea mays OX=4577 GN=100282224 PE=2 SV=1 - [B4FQI3_MAIZE]	24.48	3	3	7	143	15.9632	9.36377	0.922596	0.886541	0.941846	0.916994	1.0159	1.05898	0.979928	1.01827	0.900541	0.0224581
C0P3H6	Uncharacterized protein		Uncharacterized protein OS=Zea mays OX=4577 PE=2 SV=1 - [C0P3H6_MAIZE]	24.41	2	2	4	127	14.1972	7.88428	1.02203	1.11632	1.08287	1.07374	0.990462	0.924341	0.935118	0.949974	1.13028	0.0227367
A0A1D6MR46	Coatomer subunit beta	100384840	Coatomer subunit beta OS=Zea mays OX=4577 GN=100384840 PE=4 SV=1 - [A0A1D6MR46_MAIZE]	24.15	17	17	42	857	94.6881	6.0874	1.03756	1.14481	1.09339	1.09192	0.975445	0.853901	0.933995	0.921114	1.18544	0.0224438
A0A1D6EJ84	Clathrin heavy chain	ZEAMMB73_Zm00001d005090	Clathrin heavy chain OS=Zea mays OX=4577 GN=ZEAMMB73_Zm00001d005090 PE=3 SV=1 - [A0A1D6EJ84_MAIZE]	23.99	2	36	130	1588	179.986	5.49072	1.04625	1.0714	1.02393	1.04719	0.920187	0.935589	0.910689	0.922155	1.13559	0.00128664
A0A1D6QV67	60S ribosomal protein L9-1	100283325	60S ribosomal protein L9-1 OS=Zea mays OX=4577 GN=100283325 PE=4 SV=1 - [A0A1D6QV67_MAIZE]	23.78	1	4	24	164	18.3348	9.81787	0.837588	0.915809	0.894696	0.882698	0.988162	1.00976	1.07451	1.02414	0.861889	0.0154563
A0A1D6F5C3	Protein disulfide-isomerase	606410	Protein disulfide-isomerase OS=Zea mays OX=4577 GN=606410 PE=3 SV=1 - [A0A1D6F5C3_MAIZE]	23.37	5	9	33	445	49.5201	5.09717	0.88373	0.962503	0.955953	0.934062	1.03572	1.03626	1.07045	1.04748	0.891723	0.0149721
B6SIU4	Peroxidase	ZEAMMB73_Zm00001d040399	Peroxidase OS=Zea mays OX=4577 GN=ZEAMMB73_Zm00001d040399 PE=2 SV=1 - [B6SIU4_MAIZE]	23.12	6	6	14	346	36.4683	8.47021	1.14152	1.14598	1.05401	1.11384	0.980658	1.02979	0.988187	0.999547	1.11434	0.0272784
B4FUH2	Aspartate aminotransferase	100273311	Aspartate aminotransferase OS=Zea mays OX=4577 GN=100273311 PE=2 SV=1 - [B4FUH2_MAIZE]	23.09	11	11	44	459	50.1506	8.38232	1.08518	1.02146	1.03616	1.0476	0.939455	0.975579	0.958789	0.957941	1.09359	0.0149469
B6UHU1	Catalase	542369	Catalase OS=Zea mays OX=4577 GN=542369 PE=2 SV=1 - [B6UHU1_MAIZE]	22.97	9	10	47	492	56.7202	7.40088	0.93899	0.929153	0.943823	0.937322	1.02752	1.01448	1.0635	1.03517	0.905478	0.00305474
C0PA91	Uncharacterized protein		Uncharacterized protein OS=Zea mays OX=4577 PE=2 SV=1 - [C0PA91_MAIZE]	22.8	3	6	22	364	39.4386	8.70459	0.971671	0.83784	0.918587	0.909366	1.01337	1.08337	1.08201	1.05958	0.858229	0.0293924
A0A1D6NN07	DNA-damage-repair/toleration protein DRT102	ZEAMMB73_Zm00001d044548	DNA-damage-repair/toleration protein DRT102 OS=Zea mays OX=4577 GN=ZEAMMB73_Zm00001d044548 PE=4 SV=1 - [A0A1D6NN07_MAIZE]	22.8	6	6	10	307	32.9692	5.04639	0.949777	0.967312	0.920793	0.945961	1.07684	1.00861	1.13823	1.07456	0.880325	0.0319815
A0A1D6DUX3	26S proteasome non-ATPase regulatory subunit 7 homolog A	100274928	26S proteasome non-ATPase regulatory subunit 7 homolog A OS=Zea mays OX=4577 GN=100274928 PE=4 SV=1 - [A0A1D6DUX3_MAIZE]	22.65	5	5	11	287	32.4893	6.81494	1.11336	1.06227	1.13699	1.10421	0.930397	0.992238	0.909335	0.94399	1.16972	0.00852531
A0A317YCA1	Glycine-rich RNA-binding protein RZ1A	Zm00014a_019799	Glycine-rich RNA-binding protein RZ1A OS=Zea mays OX=4577 GN=Zm00014a_019799 PE=4 SV=1 - [A0A317YCA1_MAIZE]	22.55	5	5	9	204	21.7901	7.75244	0.853345	0.960609	0.960502	0.924819	1.05792	1.123	1.07192	1.08428	0.852932	0.0174803
A0A1D6GK62	Proteasome subunit beta	ZEAMMB73_Zm00001d013505	Proteasome subunit beta OS=Zea mays OX=4577 GN=ZEAMMB73_Zm00001d013505 PE=3 SV=1 - [A0A1D6GK62_MAIZE]	22.45	2	4	18	196	21.5051	5.90967	0.948962	1.00745	0.936025	0.964145	1.01246	1.07466	1.07932	1.05548	0.913468	0.0412417
B4G1P9	3-N-debenzoyl-2-deoxytaxol N-benzoyltransferase	100284721	3-N-debenzoyl-2-deoxytaxol N-benzoyltransferase OS=Zea mays OX=4577 GN=100284721 PE=2 SV=1 - [B4G1P9_MAIZE]	22.43	3	9	38	428	45.9195	5.31299	1.01738	1.10256	1.03004	1.04999	0.981203	0.922565	0.968956	0.957574	1.09651	0.0445892
Q5GAU1	Putative alanine aminotransferase	C9009	Putative alanine aminotransferase OS=Zea mays OX=4577 GN=C9009 PE=4 SV=1 - [Q5GAU1_MAIZE]	22.09	7	9	33	516	56.4187	5.64307	0.947586	0.962094	0.992983	0.967554	0.995708	1.02355	1.01773	1.01233	0.955769	0.0475522
B6TQ98	Peroxisomal multifunctional enzyme type 2	100284127	Peroxisomal multifunctional enzyme type 2 OS=Zea mays OX=4577 GN=100284127 PE=2 SV=1 - [B6TQ98_MAIZE]	21.31	3	3	10	122	13.2141	9.46631	1.19601	1.13185	1.21261	1.18016	0.946654	1.01793	0.991455	0.985348	1.1977	0.00378124
A0A1D6IKV5	TolB protein-related	103633477	TolB protein-related OS=Zea mays OX=4577 GN=103633477 PE=4 SV=1 - [A0A1D6IKV5_MAIZE]	20.39	10	10	29	667	72.134	6.27783	0.849061	0.91486	0.932786	0.898903	1.02328	1.01177	1.09598	1.04368	0.861284	0.0168054
A0A1D6EFN9	Pyruvate dehydrogenase E1 component subunit alpha	100272834	Pyruvate dehydrogenase E1 component subunit alpha OS=Zea mays OX=4577 GN=100272834 PE=4 SV=1 - [A0A1D6EFN9_MAIZE]	20.33	7	7	26	428	46.3743	6.88818	0.818583	0.934746	0.924222	0.892517	1.08959	1.03344	1.02739	1.05014	0.849902	0.0199684
A0A1D6M9Z1	Ras-related protein RABG3f	100383121	Ras-related protein RABG3f OS=Zea mays OX=4577 GN=100383121 PE=4 SV=1 - [A0A1D6M9Z1_MAIZE]	20.33	2	4	10	182	20.4149	4.93213	0.896076	1.0097	0.900894	0.935557	1.07757	1.03583	1.08791	1.06711	0.876724	0.0311232
A0A1D6HDL5	Phenylalanine ammonia-lyase	100273579	Phenylalanine ammonia-lyase OS=Zea mays OX=4577 GN=100273579 PE=3 SV=1 - [A0A1D6HDL5_MAIZE]	20.17	8	12	28	719	77.3527	6.63916	1.02914	1.06672	1.09359	1.06315	0.95426	0.903299	0.981497	0.946352	1.12342	0.016826
C0HI51	Zn-dependent exopeptidase superfamily protein	100304311	Zn-dependent exopeptidase superfamily protein OS=Zea mays OX=4577 GN=100304311 PE=2 SV=1 - [C0HI51_MAIZE]	19.79	7	7	17	475	52.1664	6.7124	0.916942	0.966262	0.95491	0.946038	1.00079	1.03359	1.03212	1.02217	0.925521	0.014278
B4FT16	Vacuolar protein sorting 26	100282332	Vacuolar protein sorting 26 OS=Zea mays OX=4577 GN=100282332 PE=2 SV=1 - [B4FT16_MAIZE]	19.74	3	6	16	304	35.3112	7.32764	0.951956	0.913639	0.932099	0.932565	1.02489	1.00355	1.02391	1.01745	0.916572	0.00289702
A0A1D6K433	Peroxidase	103635381	Peroxidase OS=Zea mays OX=4577 GN=103635381 PE=3 SV=1 - [A0A1D6K433_MAIZE]	19.64	5	6	22	336	35.2747	7.31299	0.956469	0.939722	0.902545	0.932912	1.00525	1.13913	1.21094	1.11844	0.834118	0.0409011
B4FQS1	4,5-DOPA dioxygenase extradiol		4,5-DOPA dioxygenase extradiol OS=Zea mays OX=4577 PE=2 SV=1 - [B4FQS1_MAIZE]	19.62	2	4	17	265	29.3086	6.52197	0.881094	0.967353	0.879261	0.909236	1.08715	1.07591	1.03585	1.06631	0.852697	0.00887961
C0PC62	Uncharacterized protein		Uncharacterized protein OS=Zea mays OX=4577 PE=2 SV=1 - [C0PC62_MAIZE]	19.62	6	8	24	525	57.194	5.66846	1.07314	1.10459	1.06766	1.0818	0.895968	0.924041	0.925585	0.915198	1.18203	0.000373972
K7UQT7	Putative elongation factor 1-gamma 2	100284862	Putative elongation factor 1-gamma 2 OS=Zea mays OX=4577 GN=100284862 PE=4 SV=1 - [K7UQT7_MAIZE]	19.32	4	7	26	414	46.9209	6.80029	0.890142	0.918159	0.954005	0.920769	1.04219	1.02921	1.07225	1.04788	0.878694	0.00479693
B4FRD9	Eukaryotic translation initiation factor 3 subunit F	100272886	Eukaryotic translation initiation factor 3 subunit F OS=Zea mays OX=4577 GN=100272886 PE=2 SV=1 - [B4FRD9_MAIZE]	19.16	2	4	15	287	31.444	5.36377	0.867582	0.953086	0.931464	0.917377	1.0351	1.07382	1.06671	1.05854	0.866642	0.00754656
A0A1D6NDJ4	Malic enzyme	ZEAMMB73_Zm00001d043601	Malic enzyme OS=Zea mays OX=4577 GN=ZEAMMB73_Zm00001d043601 PE=3 SV=1 - [A0A1D6NDJ4_MAIZE]	18.72	8	10	49	593	65.4688	5.90967	0.934005	0.883704	0.905228	0.907645	1.01131	0.999	1.08776	1.03269	0.878912	0.0162928
A0A1D6PJL0	Aconitate hydratase	100304315	Aconitate hydratase OS=Zea mays OX=4577 GN=100304315 PE=3 SV=1 - [A0A1D6PJL0_MAIZE]	18.6	3	16	87	989	106.723	6.75635	0.894189	0.923919	0.893716	0.903941	1.05601	1.03156	1.10299	1.06352	0.849952	0.00234708
A0A1D6DW07	D-3-phosphoglycerate dehydrogenase	103645840	D-3-phosphoglycerate dehydrogenase OS=Zea mays OX=4577 GN=103645840 PE=3 SV=1 - [A0A1D6DW07_MAIZE]	18.53	9	10	42	626	64.7555	7.21045	0.886921	0.888597	0.970354	0.915291	1.09557	1.14604	0.982459	1.07469	0.851681	0.0457344
Q9SPD7	Outer mitochondrial membrane protein porin	vdac2	Outer mitochondrial membrane protein porin OS=Zea mays OX=4577 GN=vdac2 PE=2 SV=1 - [Q9SPD7_MAIZE]	18.48	4	4	21	276	29.1599	8.11865	1.15969	1.12725	1.05845	1.11513	0.954585	1.00871	0.952962	0.972086	1.14715	0.0150422
B4FA06	APx4-Peroxisomal Ascorbate Peroxidase		APx4-Peroxisomal Ascorbate Peroxidase OS=Zea mays OX=4577 PE=2 SV=1 - [B4FA06_MAIZE]	18.34	4	5	17	289	31.6704	7.95752	0.934117	0.998639	0.900972	0.944576	1.03952	1.0601	1.01131	1.03698	0.910895	0.0445597
B6T8P9	Uncharacterized protein	100276325	Uncharacterized protein OS=Zea mays OX=4577 GN=100276325 PE=2 SV=1 - [B6T8P9_MAIZE]	18.31	2	3	8	142	16.137	6.52197	0.955462		0.943681	0.949571	1.03002		1.01402	1.02202	0.929112	0.0182775
B6T408	Uncharacterized protein	Zm00014a_008906	Uncharacterized protein OS=Zea mays OX=4577 GN=Zm00014a_008906 PE=2 SV=1 - [B6T408_MAIZE]	18.13	4	4	11	182	20.0209	6.59521	0.928709	0.915852	0.877558	0.907373	1.04808	1.04137	1.1048	1.06475	0.852195	0.00340662
A0A1D6J0P6	Tyrosyl-tRNA synthetase	100282839	Tyrosyl-tRNA synthetase OS=Zea mays OX=4577 GN=100282839 PE=3 SV=1 - [A0A1D6J0P6_MAIZE]	17.99	6	6	11	378	42.5434	7.07861	1.06485	1.02186	1.03339	1.04003	0.952513	0.995614	0.959838	0.969322	1.07295	0.0187458
A0A1D6E568	AP-4 complex subunit mu	103646175	AP-4 complex subunit mu OS=Zea mays OX=4577 GN=103646175 PE=3 SV=1 - [A0A1D6E568_MAIZE]	17.94	6	6	20	379	42.2177	6.96143	0.961627	0.945314	0.931855	0.946265	1.0581	1.05973	1.05726	1.05836	0.894084	0.000203432
A0A1D6Q2J6	Ribonuclease	100280237	Ribonuclease OS=Zea mays OX=4577 GN=100280237 PE=4 SV=1 - [A0A1D6Q2J6_MAIZE]	17.84	9	17	69	970	106.237	6.7417	0.890036	0.952616	0.951143	0.931265	1.09439	1.05127	0.991305	1.04565	0.890606	0.0345074
A0A1D6HD80	RAN GTPase-activating protein 2	ZEAMMB73_Zm00001d017239	RAN GTPase-activating protein 2 OS=Zea mays OX=4577 GN=ZEAMMB73_Zm00001d017239 PE=4 SV=1 - [A0A1D6HD80_MAIZE]	17.78	3	9	14	523	56.7959	4.70361		0.941912	0.934026	0.937969		1.03278	1.07762	1.0552	0.888901	0.0356963
A0A1D6HMS1	CAP (Cysteine-rich secretory proteins Antigen 5 and Pathogenesis-related 1 protein) superfamily protein	103627834	CAP (Cysteine-rich secretory proteins Antigen 5 and Pathogenesis-related 1 protein) superfamily protein OS=Zea mays OX=4577 GN=103627834 PE=3 SV=1 - [A0A1D6HMS1_MAIZE]	17.61	2	2	4	176	18.4022	9.84717	1.14464	1.06971	1.16169	1.12535	0.890029	0.993287	0.998965	0.96076	1.17131	0.0220885
B6TAA7	Chaperonin	100282681	Chaperonin OS=Zea mays OX=4577 GN=100282681 PE=2 SV=1 - [B6TAA7_MAIZE]	17.53	2	3	6	97	10.5709	7.25439	0.886607	0.960522	0.943113	0.930081	0.997752	1.10852	1.05668	1.05432	0.882164	0.0333796
B4F9M9	Isocitrate dehydrogenase [NADP]		Isocitrate dehydrogenase [NADP] OS=Zea mays OX=4577 PE=2 SV=1 - [B4F9M9_MAIZE]	17.5	3	7	41	400	45.399	6.39209	0.898269	0.850758	0.956848	0.901959	1.08535	1.09575	1.02136	1.06749	0.844936	0.01265
A0A1D6KS88	Alpha-galactosidase	ZEAMMB73_Zm00001d032605	Alpha-galactosidase OS=Zea mays OX=4577 GN=ZEAMMB73_Zm00001d032605 PE=3 SV=1 - [A0A1D6KS88_MAIZE]	17.33	5	6	19	352	38.5803	6.0874	1.10854	1.11107	1.05296	1.09086	0.939965	1.00354	0.979351	0.974287	1.11965	0.0117177
B6TZE6	Pectinesterase 31	100284984	Pectinesterase 31 OS=Zea mays OX=4577 GN=100284984 PE=2 SV=1 - [B6TZE6_MAIZE]	17.28	3	3	5	324	36.0918	7.95752	0.918498	0.948368		0.933433	1.06317	1.07996		1.07157	0.871091	0.015039
B4G1Q6	Uncharacterized protein		Uncharacterized protein OS=Zea mays OX=4577 PE=2 SV=1 - [B4G1Q6_MAIZE]	17.13	4	4	13	397	42.1479	5.8208	1.05672	1.08314	1.05821	1.06603	0.941906	1.0027	0.945267	0.96329	1.10665	0.0087975
A0A1D6LKL2	Zinc finger (C3HC4-type RING finger) family protein	ZEAMMB73_Zm00001d036072	Zinc finger (C3HC4-type RING finger) family protein OS=Zea mays OX=4577 GN=ZEAMMB73_Zm00001d036072 PE=4 SV=1 - [A0A1D6LKL2_MAIZE]	16.98	2	11	27	630	67.9381	6.59521	0.934522	0.859298	0.92124	0.90502	1.00184	1.1693	1.08656	1.0859	0.83343	0.0279484
A0A1D6LE55	Peroxidase	103628960	Peroxidase OS=Zea mays OX=4577 GN=103628960 PE=3 SV=1 - [A0A1D6LE55_MAIZE]	16.72	5	5	23	323	34.8252	5.50342	0.961175	0.884609	0.828262	0.891349	0.988347	1.11069	1.10746	1.06883	0.833946	0.0333524
C0PHH5	Dihydrolipoyl dehydrogenase	100383599	Dihydrolipoyl dehydrogenase OS=Zea mays OX=4577 GN=100383599 PE=2 SV=1 - [C0PHH5_MAIZE]	16.64	4	8	20	565	59.317	7.06396	0.933547	0.975572	0.973649	0.960923	1.09184	1.08213	1.04535	1.07311	0.895458	0.0046979
A0A1D6I6V3	ATP phosphoribosyltransferase 2 chloroplastic	ZEAMMB73_Zm00001d020908	ATP phosphoribosyltransferase 2 chloroplastic OS=Zea mays OX=4577 GN=ZEAMMB73_Zm00001d020908 PE=3 SV=1 - [A0A1D6I6V3_MAIZE]	16.46	7	7	21	401	44.1834	8.63135	0.881451	0.92508	0.977672	0.928068	1.05096	1.10634	1.07807	1.07846	0.860552	0.00939624
B4FD03	Aldolase superfamily protein	100192890	Aldolase superfamily protein OS=Zea mays OX=4577 GN=100192890 PE=2 SV=1 - [B4FD03_MAIZE]	16.24	5	5	14	394	42.8782	5.70654	0.838116	0.876059	0.954811	0.889662	1.09044	1.06143	1.04082	1.06423	0.83597	0.0094109
B4FRJ8	Uncharacterized protein		Uncharacterized protein OS=Zea mays OX=4577 PE=2 SV=1 - [B4FRJ8_MAIZE]	15.95	4	4	6	351	38.9349	5.47803	1.03848	1.11104	1.00065	1.05006	0.972795	0.916197	0.901804	0.930265	1.12877	0.0371482
B6U6S0	Ubiquitin domain containing 1	100285566	Ubiquitin domain containing 1 OS=Zea mays OX=4577 GN=100285566 PE=2 SV=1 - [B6U6S0_MAIZE]	15.93	2	2	4	113	12.5012	5.94775	0.951037	0.952078	0.906749	0.936621	0.967577	0.999404	1.01419	0.993723	0.942537	0.0482107
B4FH35	Peroxidase	100194008	Peroxidase OS=Zea mays OX=4577 GN=100194008 PE=2 SV=1 - [B4FH35_MAIZE]	15.77	3	4	7	336	35.6902	9.5249	0.947599	0.950164	0.945954	0.947906	1.01631	1.12061	1.08152	1.07281	0.883569	0.01482
A0A1D6KJ07	Aminoacylase-1	ZEAMMB73_Zm00001d031473	Aminoacylase-1 OS=Zea mays OX=4577 GN=ZEAMMB73_Zm00001d031473 PE=4 SV=1 - [A0A1D6KJ07_MAIZE]	15.7	6	6	11	446	48.9889	5.47803	0.994744	0.938305	0.954553	0.962534	1.03432	1.06015	1.01443	1.0363	0.928817	0.025999
A0A1D6H9K5	Mitochondrial import inner membrane translocase subunit Tim17/Tim22/Tim23 family protein	ZEAMMB73_Zm00001d016665	Mitochondrial import inner membrane translocase subunit Tim17/Tim22/Tim23 family protein OS=Zea mays OX=4577 GN=ZEAMMB73_Zm00001d016665 PE=4 SV=1 - [A0A1D6H9K5_MAIZE]	15.5	3	3	8	271	28.3407	9.70068	0.839865	0.84144	0.939744	0.873683	1.02717	1.015	0.957169	0.999778	0.873877	0.0330531
A0A317YJZ7	Biotin synthase	BIO2_0	Biotin synthase OS=Zea mays OX=4577 GN=BIO2_0 PE=3 SV=1 - [A0A317YJZ7_MAIZE]	15.49	3	12	56	852	94.5476	5.80811	1.03112	1.13919	1.09126	1.08719	0.99348	0.971515	0.920227	0.961741	1.13044	0.0300376
B6TU84	Epoxide hydrolase 2		Epoxide hydrolase 2 OS=Zea mays OX=4577 PE=2 SV=1 - [B6TU84_MAIZE]	15.44	3	4	21	285	31.147	8.39697	0.961025	0.969039	0.959043	0.963036	0.987374	1.017	1.0481	1.01749	0.946482	0.0376628
B6T2C2	Uncharacterized protein		Uncharacterized protein OS=Zea mays OX=4577 PE=2 SV=1 - [B6T2C2_MAIZE]	15.43	2	2	3	175	19.3519	7.98682	0.922477	0.87548		0.898979	1.06266	1.08529		1.07398	0.837055	0.0214986
A0A1D6Q540	RAN GTPase-activating protein 2	ZEAMMB73_Zm00001d051112	RAN GTPase-activating protein 2 OS=Zea mays OX=4577 GN=ZEAMMB73_Zm00001d051112 PE=4 SV=1 - [A0A1D6Q540_MAIZE]	15.31	3	9	18	516	56.1795	4.65283	0.98108	0.895534	0.965771	0.947462	1.01375	1.0769	1.03498	1.04187	0.909382	0.0427873
A0A1D6GPQ4	Heterogeneous nuclear ribonucleoprotein 1	100280293	Heterogeneous nuclear ribonucleoprotein 1 OS=Zea mays OX=4577 GN=100280293 PE=4 SV=1 - [A0A1D6GPQ4_MAIZE]	15.06	3	6	26	445	44.2205	6.65381	0.913778	0.889995	0.957273	0.920349	1.0066	1.14787	1.0309	1.06179	0.866789	0.0417186
A0A1D6DUM9	Zinc finger CCCH domain-containing protein 52	100192020	Zinc finger CCCH domain-containing protein 52 OS=Zea mays OX=4577 GN=100192020 PE=4 SV=1 - [A0A1D6DUM9_MAIZE]	14.96	3	3	7	234	24.255	9.24658	0.887582	0.982147	0.903676	0.924468	1.12171	1.03167	1.14392	1.0991	0.841116	0.0179189
A0A1D6NFJ2	Glutamate synthase 1 [NADH] chloroplastic	103651348	Glutamate synthase 1 [NADH] chloroplastic OS=Zea mays OX=4577 GN=103651348 PE=4 SV=1 - [A0A1D6NFJ2_MAIZE]	14.91	29	29	81	2153	235.343	6.91748	1.02964	0.98557	1.00546	1.00689	0.949975	0.979173	0.951032	0.96006	1.04878	0.0424076
A0A1D6KMT8	7,8-dihydroneopterin aldolase	103643202	7,8-dihydroneopterin aldolase OS=Zea mays OX=4577 GN=103643202 PE=3 SV=1 - [A0A1D6KMT8_MAIZE]	14.81	2	2	4	135	14.6276	6.17627	0.834437	0.902765	0.940905	0.892702	1.09779	1.10333	1.00328	1.06814	0.835756	0.0175486
A0A1D6I3K9	Glycosyl hydrolase family 81 protein	100216714	Glycosyl hydrolase family 81 protein OS=Zea mays OX=4577 GN=100216714 PE=4 SV=1 - [A0A1D6I3K9_MAIZE]	14.76	8	9	49	752	81.9773	7.31299	0.932533	0.852328	0.898955	0.894605	1.04036	0.957572	1.06434	1.02076	0.876413	0.0339599
A0A1D6DZK4	Uncharacterized protein	ZEAMMB73_Zm00001d002325	Uncharacterized protein OS=Zea mays OX=4577 GN=ZEAMMB73_Zm00001d002325 PE=4 SV=1 - [A0A1D6DZK4_MAIZE]	14.76	21	25	57	1843	208.607	4.65283	0.957763	0.912493	0.947547	0.939268	1.05321	1.14379	1.05906	1.08535	0.865402	0.0106542
A0A1D6IC26	Malic enzyme	100191942	Malic enzyme OS=Zea mays OX=4577 GN=100191942 PE=3 SV=1 - [A0A1D6IC26_MAIZE]	14.72	8	9	30	591	66.172	7.07861	0.988366	0.922115	0.95893	0.95647	1.03377	1.05222	1.04941	1.04513	0.915165	0.0114039
K7V8K5	Peroxidase	ZEAMMB73_Zm00001d045845	Peroxidase OS=Zea mays OX=4577 GN=ZEAMMB73_Zm00001d045845 PE=3 SV=1 - [K7V8K5_MAIZE]	14.71	3	4	14	333	35.3479	7.84033	0.860735	0.946553	0.933228	0.913505	1.10516	1.10749	1.05325	1.08863	0.839131	0.00542833
B4FSW8	Grx_S17-glutaredoxin subgroup II	100283390	Grx_S17-glutaredoxin subgroup II OS=Zea mays OX=4577 GN=100283390 PE=2 SV=1 - [B4FSW8_MAIZE]	14.63	3	5	11	499	54.0143	5.43994	1.08446	1.11005	0.992648	1.06239	0.964356	0.932035	0.942896	0.946429	1.12252	0.0347271
A0A1D6H8W7	Ubiquitin-activating enzyme E1 domain-containing protein 1	100282359	Ubiquitin-activating enzyme E1 domain-containing protein 1 OS=Zea mays OX=4577 GN=100282359 PE=4 SV=1 - [A0A1D6H8W7_MAIZE]	14.61	3	3	10	219	24.2401	5.17334	0.882167	0.934722	0.990194	0.935694	1.04355	1.06424	1.09807	1.06862	0.875611	0.019145
A0A1D6LVR6	DCD (Development and Cell Death) domain protein	100502502	DCD (Development and Cell Death) domain protein OS=Zea mays OX=4577 GN=100502502 PE=4 SV=1 - [A0A1D6LVR6_MAIZE]	14.57	5	5	9	302	34.935	9.48096	0.978859	0.923557	0.893512	0.931976	1.04657	1.05791	1.09728	1.06725	0.873247	0.00995186
C0P8K3	Uncharacterized protein		Uncharacterized protein OS=Zea mays OX=4577 PE=2 SV=1 - [C0P8K3_MAIZE]	14.45	6	6	17	436	48.1364	5.16064	0.857191	0.905164	0.916735	0.89303	1.04031	1.13346	0.988907	1.05422	0.847097	0.02491
B6U0Y0	Eukaryotic translation initiation factor 3 subunit K	100194334	Eukaryotic translation initiation factor 3 subunit K OS=Zea mays OX=4577 GN=100194334 PE=2 SV=1 - [B6U0Y0_MAIZE]	14.16	2	3	13	226	25.8203	5.37646	0.852218	0.972631	0.944569	0.92314	1.0726	1.05574	1.01676	1.04837	0.880551	0.0350474
A0A1D6LKE5	Serine/threonine-protein phosphatase 2A 65 kDa regulatory subunit A beta isoform	732740	Serine/threonine-protein phosphatase 2A 65 kDa regulatory subunit A beta isoform OS=Zea mays OX=4577 GN=732740 PE=4 SV=1 - [A0A1D6LKE5_MAIZE]	14.1	8	8	30	553	61.9882	5.04639	1.05758	1.05395	1.05415	1.05523	0.979875	0.924425	1.01503	0.973111	1.08438	0.0358595
B4FF27	Uncharacterized protein		Uncharacterized protein OS=Zea mays OX=4577 PE=2 SV=1 - [B4FF27_MAIZE]	14.09	5	5	10	369	40.7085	5.23682	0.933676	0.888099	0.911561	0.911112	0.953274	1.06169	1.05831	1.02442	0.889389	0.0404842
C0PKG4	Uncharacterized protein		Uncharacterized protein OS=Zea mays OX=4577 PE=2 SV=1 - [C0PKG4_MAIZE]	14.04	2	2	3	171	19.1103	5.33838	0.894154	0.844427		0.869291	1.05235	1.0332		1.04277	0.833634	0.0227832
A0A1D6FTB8	Gamma-glutamyl hydrolase 1	ZEAMMB73_Zm00001d010744	Gamma-glutamyl hydrolase 1 OS=Zea mays OX=4577 GN=ZEAMMB73_Zm00001d010744 PE=4 SV=1 - [A0A1D6FTB8_MAIZE]	14.04	5	5	17	342	37.8913	6.23975	1.04678	1.08745	1.08085	1.0717	0.969224	0.963198	0.976304	0.969575	1.10532	0.00148553
A0A1D6J4J8	Serine/arginine-rich splicing factor RS31A	542174	Serine/arginine-rich splicing factor RS31A OS=Zea mays OX=4577 GN=542174 PE=4 SV=1 - [A0A1D6J4J8_MAIZE]	14.04	2	2	4	178	20.6146	9.39307	1.10899	1.07593	1.0494	1.07811	0.946132	0.980481	0.991728	0.97278	1.10827	0.00876341
A0A1D6E7A7	Uncharacterized protein	ZEAMMB73_Zm00001d003186	Uncharacterized protein OS=Zea mays OX=4577 GN=ZEAMMB73_Zm00001d003186 PE=4 SV=1 - [A0A1D6E7A7_MAIZE]	13.98	4	4	16	379	40.2593	6.43018	1.08371	1.04571	1.05784	1.06242	1.00864	1.02699	1.02642	1.02068	1.04089	0.0305086
B6U2I9	Esterase PIR7B		Esterase PIR7B OS=Zea mays OX=4577 PE=2 SV=1 - [B6U2I9_MAIZE]	13.97	2	3	5	272	28.7355	6.37939	1.02731	1.06774	1.06593	1.05366	0.998532	0.978839	0.919039	0.96547	1.09134	0.0319506
B6SSV3	Fasciclin-like arabinogalactan protein 7	100281174	Fasciclin-like arabinogalactan protein 7 OS=Zea mays OX=4577 GN=100281174 PE=2 SV=1 - [B6SSV3_MAIZE]	13.92	3	4	22	273	28.0906	9.01221	0.924698	0.943043	0.907345	0.925029	1.01084	1.15085	1.04087	1.06752	0.866521	0.0312517
A0A1D6NJS4	Tetratricopeptide repeat (TPR)-containing protein	100274696	Tetratricopeptide repeat (TPR)-containing protein OS=Zea mays OX=4577 GN=100274696 PE=4 SV=1 - [A0A1D6NJS4_MAIZE]	13.82	11	11	27	861	98.5726	6.60986	1.05018	1.05896	1.01691	1.04202	1.00647	0.968419	0.97797	0.984285	1.05866	0.0282105
A0A1D6II57	Peroxidase	ZEAMMB73_Zm00001d021965	Peroxidase OS=Zea mays OX=4577 GN=ZEAMMB73_Zm00001d021965 PE=3 SV=1 - [A0A1D6II57_MAIZE]	13.77	4	4	13	334	34.2953	8.41162	0.924753	0.866963	0.955172	0.91563	1.06666	1.18564	1.02809	1.09346	0.837365	0.0301453
A0A1D6DVH7	Lipoxygenase	100037805	Lipoxygenase OS=Zea mays OX=4577 GN=100037805 PE=3 SV=1 - [A0A1D6DVH7_MAIZE]	13.73	7	8	13	699	77.3811	5.68115	1.07916	1.03655	1.01466	1.04345	0.98702	0.958363	0.940354	0.961912	1.08477	0.0249308
B6SJW3	Uncharacterized protein	100274833	Uncharacterized protein OS=Zea mays OX=4577 GN=100274833 PE=2 SV=1 - [B6SJW3_MAIZE]	13.71	4	4	7	321	33.893	9.5835	0.918931	0.928522	0.893987	0.913813	1.01954	1.15776	1.10259	1.09329	0.835834	0.0123684
A0A1D6PA97	Nucleolar protein NOP56-like protein	103639131	Nucleolar protein NOP56-like protein OS=Zea mays OX=4577 GN=103639131 PE=4 SV=1 - [A0A1D6PA97_MAIZE]	13.65	7	7	16	542	60.3054	8.80713	1.03194	1.06449	1.11526	1.07056	0.987197	0.926899	0.913733	0.94261	1.13574	0.0181577
B4FMA8	RNA-binding (RRM/RBD/RNP motifs) family protein	100217268	RNA-binding (RRM/RBD/RNP motifs) family protein OS=Zea mays OX=4577 GN=100217268 PE=2 SV=1 - [B4FMA8_MAIZE]	13.58	5	5	12	383	39.7521	8.90967	1.12268	1.17535	1.07366	1.1239	0.990521	0.968318	0.954079	0.970972	1.1575	0.0080517
A0A1D6KNU5	Temperature-induced lipocalin-1	100286188	Temperature-induced lipocalin-1 OS=Zea mays OX=4577 GN=100286188 PE=3 SV=1 - [A0A1D6KNU5_MAIZE]	13.57	2	2	8	140	16.029	7.98682	0.938343	0.929216	0.919908	0.929156	1.09045	1.0677	0.990719	1.04962	0.885229	0.0170792
A0A1D6LBF8	Protease Do-like 7	ZEAMMB73_Zm00001d034800	Protease Do-like 7 OS=Zea mays OX=4577 GN=ZEAMMB73_Zm00001d034800 PE=4 SV=1 - [A0A1D6LBF8_MAIZE]	12.66	2	3	13	229	25.1117	4.55127	1.07629	1.05617	1.09876	1.07707	0.926578	1.00933	0.973294	0.969734	1.11069	0.0163176
A0A1D6EJ56	Ubiquitin-activating enzyme E1 2	100382860	Ubiquitin-activating enzyme E1 2 OS=Zea mays OX=4577 GN=100382860 PE=3 SV=1 - [A0A1D6EJ56_MAIZE]	12.54	1	11	31	1037	115.281	5.36377	0.852755	0.850294	0.952362	0.885137	1.08004	1.067	1.01621	1.05442	0.839457	0.0120904
B8A0T6	Aspartate aminotransferase		Aspartate aminotransferase OS=Zea mays OX=4577 PE=2 SV=1 - [B8A0T6_MAIZE]	12.35	5	5	14	421	46.8285	7.15186	1.01595	1.02731	1.02451	1.02259	0.957881	0.946415	0.958768	0.954354	1.0715	0.0002014
A0A1D6FKG0	Aspartic proteinase A1	ZEAMMB73_Zm00001d009594	Aspartic proteinase A1 OS=Zea mays OX=4577 GN=ZEAMMB73_Zm00001d009594 PE=3 SV=1 - [A0A1D6FKG0_MAIZE]	12.33	1	4	13	430	46.0756	5.33838	0.953429	0.918004	0.94914	0.940191	1.02956	1.05966	1.08896	1.05939	0.88748	0.00432341
A0A1D6E051	Uncharacterized protein	100193046	Uncharacterized protein OS=Zea mays OX=4577 GN=100193046 PE=4 SV=1 - [A0A1D6E051_MAIZE]	12.28	1	1	6	114	12.4382	5.19873	0.943943	0.946145	0.877799	0.922629	1.04269	1.04555	1.1475	1.07858	0.855411	0.0192318
A0A1D6NEZ5	Serine/threonine-protein phosphatase	100381456	Serine/threonine-protein phosphatase OS=Zea mays OX=4577 GN=100381456 PE=3 SV=1 - [A0A1D6NEZ5_MAIZE]	12.09	2	2	5	182	20.6143	5.31299	0.94176	0.875638	0.860367	0.892589	1.01446	1.07053	0.958643	1.01454	0.879793	0.0404599
A0A1D6L4E5	Exoglucanase1	100191390	Exoglucanase1 OS=Zea mays OX=4577 GN=100191390 PE=4 SV=1 - [A0A1D6L4E5_MAIZE]	12.04	5	6	30	490	53.3254	9.0415	0.851109	0.903598	0.982308	0.912338	1.06693	1.04455	1.07585	1.06244	0.858716	0.0187002
A0A1D6MDV5	Carboxypeptidase	ZEAMMB73_Zm00001d039146	Carboxypeptidase OS=Zea mays OX=4577 GN=ZEAMMB73_Zm00001d039146 PE=3 SV=1 - [A0A1D6MDV5_MAIZE]	11.92	5	5	16	453	48.113	7.1665	0.893186	0.834889	0.945399	0.891158	1.03055	1.00225	1.00885	1.01389	0.878952	0.0205769
B4FJV4	Putative carboxylesterase 15	100281689	Putative carboxylesterase 15 OS=Zea mays OX=4577 GN=100281689 PE=2 SV=1 - [B4FJV4_MAIZE]	11.78	2	2	6	331	35.0182	5.79541	1.0933	1.04736	1.0937	1.07812	0.971766	0.906922	0.967617	0.948768	1.13634	0.00761924
A0A1D6NLJ1	Uncharacterized protein	ZEAMMB73_Zm00001d044412	Uncharacterized protein OS=Zea mays OX=4577 GN=ZEAMMB73_Zm00001d044412 PE=4 SV=1 - [A0A1D6NLJ1_MAIZE]	11.73	2	2	5	196	21.3528	8.77783	0.912978	0.894738	0.960897	0.922871	1.05878	1.08465	1.03058	1.058	0.872277	0.00580478
B4FR90	Hyaluronan / mRNA binding family	100282553	Hyaluronan / mRNA binding family OS=Zea mays OX=4577 GN=100282553 PE=2 SV=1 - [B4FR90_MAIZE]	11.64	1	5	13	378	40.4388	5.84619	1.08047	1.13182	1.04248	1.08492	0.959015	1.02119	1.00135	0.993852	1.09163	0.0454376
A0A1D6GU11	EH domain-containing protein 1	100384394	EH domain-containing protein 1 OS=Zea mays OX=4577 GN=100384394 PE=3 SV=1 - [A0A1D6GU11_MAIZE]	11.58	4	5	9	544	61.3385	7.59131	1.08485	1.08055	1.10311	1.0895	0.988448	0.987919	0.9398	0.972055	1.12082	0.00259288
C0PNG2	Uncharacterized protein		Uncharacterized protein OS=Zea mays OX=4577 PE=2 SV=1 - [C0PNG2_MAIZE]	11.54	2	2	4	182	20.4841	7.37158	1.14138	1.0391	1.14803	1.1095	0.988127	0.977376	0.891218	0.95224	1.16515	0.0281575
B6T442	Putative ribosomal protein S11 mitochondrial	100282151	Putative ribosomal protein S11 mitochondrial OS=Zea mays OX=4577 GN=100282151 PE=2 SV=1 - [B6T442_MAIZE]	11.51	3	3	5	252	27.8985	11.2241	1.09608	1.09629	1.14557	1.11264	0.941305	1.01356	0.860947	0.938602	1.18543	0.0208506
B6TZN5	Uncharacterized protein		Uncharacterized protein OS=Zea mays OX=4577 PE=2 SV=1 - [B6TZN5_MAIZE]	11.46	1	1	4	96	10.5895	9.99365	0.89876	0.882444	0.896166	0.892456	1.00737	1.08877	1.1059	1.06735	0.836144	0.00475368
A0A1D6J3M6	Acetyl-coenzyme A carboxylase1	100037775	Acetyl-coenzyme A carboxylase1 OS=Zea mays OX=4577 GN=100037775 PE=4 SV=1 - [A0A1D6J3M6_MAIZE]	11.44	1	21	56	2045	226.769	6.29053	1.10624	1.10165		1.10394	0.974288	1.00706		0.990675	1.11434	0.0206793
K7TNL9	Uncharacterized protein	ZEAMMB73_Zm00001d023865	Uncharacterized protein OS=Zea mays OX=4577 GN=ZEAMMB73_Zm00001d023865 PE=4 SV=1 - [K7TNL9_MAIZE]	11.42	2	2	6	254	27.4983	10.6235	1.14577	1.08343	1.05519	1.0948	0.935073	0.965113	0.982148	0.960778	1.13949	0.0112127
A0A1D6M9V3	Proline iminopeptidase	100272740	Proline iminopeptidase OS=Zea mays OX=4577 GN=100272740 PE=4 SV=1 - [A0A1D6M9V3_MAIZE]	11.34	2	2	4	247	27.9499	7.34229	1.10401	1.06395	1.13072	1.09956	0.98021	0.93734	0.897852	0.938468	1.17166	0.00630242
B6SU17	Phosphoglycerate mutase-like protein	100281287	Phosphoglycerate mutase-like protein OS=Zea mays OX=4577 GN=100281287 PE=2 SV=1 - [B6SU17_MAIZE]	11.27	3	3	9	284	31.8119	6.40479	1.06804	1.01764	1.08486	1.05685	0.97866	0.992428	0.943275	0.971454	1.0879	0.0266918
C0PCX3	Tryptophan--tRNA ligase cytoplasmic	At3g04600	Tryptophan--tRNA ligase cytoplasmic OS=Zea mays OX=4577 GN=At3g04600 PE=2 SV=1 - [C0PCX3_MAIZE]	11.27	4	4	11	408	46.1174	6.17627	1.08539	1.0799	1.0408	1.0687	0.942337	0.930475	1.01731	0.963374	1.10933	0.0262324
B6TCV9	LanC-like protein 2		LanC-like protein 2 OS=Zea mays OX=4577 PE=2 SV=1 - [B6TCV9_MAIZE]	11.22	5	5	12	401	44.4286	7.54736	0.961581	0.86871	0.864011	0.898101	1.03059	1.03052	1.14923	1.07011	0.839259	0.0275201
A0A1D6I0G7	Polyadenylate-binding protein	100381531	Polyadenylate-binding protein OS=Zea mays OX=4577 GN=100381531 PE=3 SV=1 - [A0A1D6I0G7_MAIZE]	11	1	6	25	627	68.1027	6.62451		0.940509	0.946027	0.943268		1.10659	1.09332	1.09995	0.857552	0.0020962
A0A1D6L706	rRNA N-glycosidase	103644149	rRNA N-glycosidase OS=Zea mays OX=4577 GN=103644149 PE=3 SV=1 - [A0A1D6L706_MAIZE]	10.96	4	4	15	529	58.1015	5.5542	1.00548	0.921423	1.04743	0.991443	0.842448	0.869988	0.861842	0.858093	1.1554	0.0245559
B4FR99	Acidic endochitinase	100272870	Acidic endochitinase OS=Zea mays OX=4577 GN=100272870 PE=2 SV=1 - [B4FR99_MAIZE]	10.96	3	3	7	301	32.5154	8.47021	1.01362	0.973917	1.01353	1.00036	0.952996	0.960934	0.952222	0.955384	1.04707	0.0291343
B4FQC4	Serine--tRNA ligase cytoplasmic	100272738	Serine--tRNA ligase cytoplasmic OS=Zea mays OX=4577 GN=100272738 PE=2 SV=1 - [B4FQC4_MAIZE]	10.92	5	5	14	458	51.8233	6.49365	0.97304	0.98054	0.87928	0.944287	1.07606	1.01699	1.10507	1.06604	0.885789	0.0430278
A0A1D6Q3U9	Glycerophosphodiester phosphodiesterase GDPDL3	100383563	Glycerophosphodiester phosphodiesterase GDPDL3 OS=Zea mays OX=4577 GN=100383563 PE=4 SV=1 - [A0A1D6Q3U9_MAIZE]	10.87	3	6	18	552	58.9075	6.3667	0.935604	0.963855	0.907717	0.935726	1.02234	1.05925	1.08356	1.05505	0.886901	0.0077202
B6SX61	Uncharacterized protein		Uncharacterized protein OS=Zea mays OX=4577 PE=2 SV=1 - [B6SX61_MAIZE]	10.84	1	1	3	83	9.29469	9.24658	0.892078	0.874687	0.93439	0.900385	1.00836	1.06351	1.07968	1.05052	0.857088	0.00579009
A0A1D6KR27	Prolyl carboxypeptidase like protein	100283354	Prolyl carboxypeptidase like protein OS=Zea mays OX=4577 GN=100283354 PE=4 SV=1 - [A0A1D6KR27_MAIZE]	10.81	5	5	14	509	56.0645	6.46826	0.829165	0.937755	0.924363	0.897095	1.11341	1.0434	1.07002	1.07561	0.834033	0.0109554
Q9ST24	ZmGR2b protein	ZmGR2b	ZmGR2b protein OS=Zea mays OX=4577 GN=ZmGR2b PE=2 SV=1 - [Q9ST24_MAIZE]	10.8	2	2	10	176	19.2975	4.77979	0.981568	0.96148	0.958963	0.967337	1.08132	1.11564	1.01396	1.07031	0.903794	0.0284905
B4FPP1	Thioredoxin family Trp26	100193621	Thioredoxin family Trp26 OS=Zea mays OX=4577 GN=100193621 PE=2 SV=1 - [B4FPP1_MAIZE]	10.78	2	2	3	204	22.604	5.05908	1.13694		1.0922	1.11457	0.9279		0.967938	0.947919	1.17581	0.0309499
B6STA4	Uncharacterized protein		Uncharacterized protein OS=Zea mays OX=4577 PE=2 SV=1 - [B6STA4_MAIZE]	10.75	1	1	2	93	10.1156	4.24658	0.847572		0.857816	0.852694	0.986535		1.04179	1.01416	0.840786	0.0289732
B4FZF3	Eukaryotic aspartyl protease family protein	100274178	Eukaryotic aspartyl protease family protein OS=Zea mays OX=4577 GN=100274178 PE=2 SV=1 - [B4FZF3_MAIZE]	10.72	4	4	7	429	44.7867	8.36768	0.935168	0.950659	0.904615	0.930148	1.02368	1.01679	1.13932	1.05993	0.877557	0.0365307
B6T3Z9	Small nuclear ribonucleoprotein-associated protein		Small nuclear ribonucleoprotein-associated protein OS=Zea mays OX=4577 PE=2 SV=1 - [B6T3Z9_MAIZE]	10.65	2	2	6	263	27.685	11.5024	0.938433	0.952758		0.945596	1.0216	1.01609		1.01884	0.928106	0.0107994
B4FBQ8	Cytochrome b-c1 complex subunit Rieske, mitochondrial	100192538	Cytochrome b-c1 complex subunit Rieske, mitochondrial OS=Zea mays OX=4577 GN=100192538 PE=2 SV=1 - [B4FBQ8_MAIZE]	10.62	1	3	14	273	29.6494	8.88037	0.85266	0.926695	0.98251	0.920622	1.10836	1.05654	1.04955	1.07148	0.859203	0.0228029
B4FQF7	Tetratricopeptide repeat (TPR)-like superfamily protein	100274920	Tetratricopeptide repeat (TPR)-like superfamily protein OS=Zea mays OX=4577 GN=100274920 PE=2 SV=1 - [B4FQF7_MAIZE]	10.55	4	4	5	417	45.73	6.56592	0.946992	0.927947	0.876292	0.917077	1.06448	0.987548	1.13942	1.06382	0.862064	0.0393443
A0A1D6ET42	Thioesterase/thiol ester dehydrase-isomerase superfamily protein	ZEAMMB73_Zm00001d006133	Thioesterase/thiol ester dehydrase-isomerase superfamily protein OS=Zea mays OX=4577 GN=ZEAMMB73_Zm00001d006133 PE=4 SV=1 - [A0A1D6ET42_MAIZE]	10.53	6	6	18	513	56.502	6.81494	1.04667	1.02503	1.05741	1.04304	0.958094	1.01484	0.947767	0.973569	1.07135	0.0387653
A0A1D6KZ64	Signal peptidase complex subunit 1	ZEAMMB73_Zm00001d033479	Signal peptidase complex subunit 1 OS=Zea mays OX=4577 GN=ZEAMMB73_Zm00001d033479 PE=4 SV=1 - [A0A1D6KZ64_MAIZE]	10.47	1	1	5	86	9.34408	10.1987	0.896281	0.909588	0.950521	0.918797	1.03469	1.07422	0.981751	1.03022	0.891845	0.023749
B4F8J8	Pyruvate kinase	100191365	Pyruvate kinase OS=Zea mays OX=4577 GN=100191365 PE=2 SV=1 - [B4F8J8_MAIZE]	10.44	5	5	15	527	57.2564	5.90967	0.860993	0.895891	0.948983	0.901956	1.04202	1.03211	0.981461	1.01853	0.885546	0.0212925
B6TYE1	Myosin-like protein	100284881	Myosin-like protein OS=Zea mays OX=4577 GN=100284881 PE=2 SV=1 - [B6TYE1_MAIZE]	10.38	3	3	4	318	34.3654	7.23975	0.909353	0.966691	0.956157	0.944067	1.12225	1.05483	1.07279	1.08329	0.871481	0.0065177
C4JA40	Phosphoribosylformylglycinamidine cyclo-ligase	100502295	Phosphoribosylformylglycinamidine cyclo-ligase OS=Zea mays OX=4577 GN=100502295 PE=2 SV=1 - [C4JA40_MAIZE]	10.34	3	3	13	387	40.8849	5.49072	0.954646	0.965407	0.960955	0.960336	1.05738	1.02452	1.04704	1.04298	0.920759	0.00125647
A0A1D6IDW0	Late embryogenesis abundant (LEA) hydroxyproline-rich glycoprotein family	103633250	Late embryogenesis abundant (LEA) hydroxyproline-rich glycoprotein family OS=Zea mays OX=4577 GN=103633250 PE=4 SV=1 - [A0A1D6IDW0_MAIZE]	10.34	1	2	5	203	22.8096	8.45557	1.18643	1.19669	1.06806	1.15039	0.939343	0.987375	1.01318	0.979965	1.17391	0.021633
A0A1D6F6B1	Aminopeptidase P1	100273786	Aminopeptidase P1 OS=Zea mays OX=4577 GN=100273786 PE=3 SV=1 - [A0A1D6F6B1_MAIZE]	10.34	6	6	11	609	68.1683	5.94775	0.873452	0.914476	0.949365	0.912431	1.09168	1.03194	1.05279	1.05881	0.861755	0.00644743
K7TLJ6	Valine--tRNA ligase mitochondrial 1	ZEAMMB73_Zm00001d024493	Valine--tRNA ligase mitochondrial 1 OS=Zea mays OX=4577 GN=ZEAMMB73_Zm00001d024493 PE=4 SV=1 - [K7TLJ6_MAIZE]	10.31	1	8	11	815	92.6559	5.41455		0.920424	0.917388	0.918906		1.07053	1.07415	1.07234	0.856918	0.000237282
C0PG78	Monocopper oxidase-like protein SKU5	100383470	Monocopper oxidase-like protein SKU5 OS=Zea mays OX=4577 GN=100383470 PE=2 SV=1 - [C0PG78_MAIZE]	10.3	5	5	10	592	65.7608	6.48096	0.969795	0.960266	0.958616	0.962892	1.06633	1.09188	1.00772	1.05531	0.912426	0.0213201
K7VP16	Protein RETICULATA-RELATED 3 chloroplastic	100276764	Protein RETICULATA-RELATED 3 chloroplastic OS=Zea mays OX=4577 GN=100276764 PE=4 SV=1 - [K7VP16_MAIZE]	10.2	2	2	10	343	34.9821	9.67139	0.808965	0.828022	0.918322	0.851769	0.958515	1.01998	1.01948	0.999328	0.852343	0.0200665
A0A1D6HV20	HIPL1 protein	ZEAMMB73_Zm00001d019089	HIPL1 protein OS=Zea mays OX=4577 GN=ZEAMMB73_Zm00001d019089 PE=4 SV=1 - [A0A1D6HV20_MAIZE]	10.17	6	7	25	698	72.3975	6.20166	0.929132	0.932296	0.853358	0.904929	1.03515	1.09887	1.08777	1.07393	0.842631	0.00646803
B4F7W8	Uncharacterized protein		Uncharacterized protein OS=Zea mays OX=4577 PE=2 SV=1 - [B4F7W8_MAIZE]	10	3	3	10	310	35.5772	9.5249	0.894854	0.930771	0.932343	0.919323	1.02921	0.997774	1.0611	1.02936	0.893099	0.00748341
B4FLA5	Protein SCO1 homolog 2 mitochondrial	ZEAMMB73_Zm00001d005662	Protein SCO1 homolog 2 mitochondrial OS=Zea mays OX=4577 GN=ZEAMMB73_Zm00001d005662 PE=2 SV=1 - [B4FLA5_MAIZE]	9.96	3	3	4	281	31.5402	8.27979	0.91597	0.877518	0.913033	0.902174	1.04452	1.00245	1.10969	1.05222	0.857402	0.0110601
A0A1D6QJ59	Ubiquitin family protein	ZEAMMB73_Zm00001d052721	Ubiquitin family protein OS=Zea mays OX=4577 GN=ZEAMMB73_Zm00001d052721 PE=4 SV=1 - [A0A1D6QJ59_MAIZE]	9.94	7	7	14	905	93.5381	5.30029	1.05626	1.05522	1.02883	1.04677	0.981858	0.957452	1.00349	0.980932	1.06712	0.0148023
A0A1D6P1A9	Beta-glucosidase 11	ZEAMMB73_Zm00001d046210	Beta-glucosidase 11 OS=Zea mays OX=4577 GN=ZEAMMB73_Zm00001d046210 PE=3 SV=1 - [A0A1D6P1A9_MAIZE]	9.91	1	1	3	111	12.7303	8.22119	0.916936	0.859911	0.892853	0.8899	1.03016	0.952615	1.10875	1.03051	0.863555	0.0428624
B6T575	1-acyl-sn-glycerol-3-phosphate acyltransferase PLS1		1-acyl-sn-glycerol-3-phosphate acyltransferase PLS1 OS=Zea mays OX=4577 PE=2 SV=1 - [B6T575_MAIZE]	9.89	3	3	9	374	42.5138	9.87646	0.87237	0.950039	0.930541	0.91765	1.12889	1.01955	1.04729	1.06524	0.861448	0.0214703
A0A1D6NK33	Protein ROOT HAIR DEFECTIVE 3	ZEAMMB73_Zm00001d044271	Protein ROOT HAIR DEFECTIVE 3 OS=Zea mays OX=4577 GN=ZEAMMB73_Zm00001d044271 PE=4 SV=1 - [A0A1D6NK33_MAIZE]	9.89	3	6	15	657	73.7299	6.03662	0.911132	0.874493		0.892813	1.05417	1.04513		1.04965	0.850581	0.0141683
B4FF86	Uncharacterized protein		Uncharacterized protein OS=Zea mays OX=4577 PE=2 SV=1 - [B4FF86_MAIZE]	9.84	3	3	13	386	43.7097	8.73389	0.965202	0.994707	1.02197	0.993959	1.08377	1.05534	1.09322	1.07744	0.922519	0.0138817
A0A1D6PYH2	Ubiquitin thioesterase otubain-like	ZEAMMB73_Zm00001d049873	Ubiquitin thioesterase otubain-like OS=Zea mays OX=4577 GN=ZEAMMB73_Zm00001d049873 PE=4 SV=1 - [A0A1D6PYH2_MAIZE]	9.75	3	3	10	277	30.2346	4.67822	0.958646	0.942106	0.953818	0.951524	1.02835	1.05087	1.08701	1.05541	0.90157	0.0042768
A0A1D6MYS9	Protein-tyrosine-phosphatase PTP1	ZEAMMB73_Zm00001d041854	Protein-tyrosine-phosphatase PTP1 OS=Zea mays OX=4577 GN=ZEAMMB73_Zm00001d041854 PE=4 SV=1 - [A0A1D6MYS9_MAIZE]	9.68	2	2	3	217	24.3351	7.45947	0.839988	0.990999	0.88635	0.905779	1.07994	1.09348	1.04639	1.07327	0.843944	0.0231971
A0A317Y855	Dolichyl-diphosphooligosaccharide--protein glycosyltransferase subunit 1	OST1A_1	Dolichyl-diphosphooligosaccharide--protein glycosyltransferase subunit 1 OS=Zea mays OX=4577 GN=OST1A_1 PE=3 SV=1 - [A0A317Y855_MAIZE]	9.63	8	8	17	623	70.0231	7.69385	1.0543	1.09271	1.04413	1.06371	0.977688	0.941391	0.971015	0.963364	1.10417	0.00562827
A0A1D6G3A9	Ras-related protein RABG3a	ZEAMMB73_Zm00001d011717	Ras-related protein RABG3a OS=Zea mays OX=4577 GN=ZEAMMB73_Zm00001d011717 PE=4 SV=1 - [A0A1D6G3A9_MAIZE]	9.57	1	2	7	188	21.4159	7.85498	0.956709	0.924961	0.869622	0.917098	1.02019	1.063	1.20594	1.09638	0.836481	0.0437765
K7TZ89	Uncharacterized protein	103652828	Uncharacterized protein OS=Zea mays OX=4577 GN=103652828 PE=4 SV=1 - [K7TZ89_MAIZE]	9.52	2	2	7	168	18.3151	6.771	1.07334	1.13592	1.04859	1.08595	0.965822	0.963801	1.01236	0.980662	1.10736	0.0258607
B4FDU9	NDR1/HIN1-like 1	100193113	NDR1/HIN1-like 1 OS=Zea mays OX=4577 GN=100193113 PE=2 SV=1 - [B4FDU9_MAIZE]	9.43	2	2	4	212	23.11	8.76318	0.87076	0.912751	0.873973	0.885828	1.0057	1.12751	1.05536	1.06286	0.833439	0.00946719
A0A1D6I5W3	ARP protein (REF)	100381485	ARP protein (REF) OS=Zea mays OX=4577 GN=100381485 PE=4 SV=1 - [A0A1D6I5W3_MAIZE]	9.42	5	5	7	573	62.3511	8.00146	0.873904	0.843774	0.963949	0.893876	1.11268	1.08253	1.01916	1.07145	0.834264	0.0173939
B6SV28	Proline-rich protein		Proline-rich protein OS=Zea mays OX=4577 PE=2 SV=1 - [B6SV28_MAIZE]	9.41	5	5	11	563	59.3872	6.20166	0.941216	0.950959	0.892311	0.928162	1.00854	1.075	1.14777	1.0771	0.861721	0.0278745
B6TIJ2	Acetylornithine deacetylase	100283456	Acetylornithine deacetylase OS=Zea mays OX=4577 GN=100283456 PE=2 SV=1 - [B6TIJ2_MAIZE]	9.4	4	4	9	447	49.1479	5.70654	0.998718	0.935826	0.957836	0.964127	1.00917	1.08186	1.04245	1.0445	0.923055	0.0451848
B6T5B2	CHCH domain containing protein		CHCH domain containing protein OS=Zea mays OX=4577 PE=2 SV=1 - [B6T5B2_MAIZE]	9.39	2	2	6	181	20.2836	9.1001	1.13799	1.08356	1.07973	1.10042	0.937789	1.01625	0.910274	0.954772	1.15255	0.0168658
B6TWE3	Uncharacterized protein		Uncharacterized protein OS=Zea mays OX=4577 PE=2 SV=1 - [B6TWE3_MAIZE]	9.29	2	2	7	183	19.1181	10.1548	1.06427	1.04181	1.08966	1.06525	0.928683	1.02671	0.94605	0.967149	1.10143	0.0418208
A0A1D6KAW3	Peroxidase	pod_1	Peroxidase OS=Zea mays OX=4577 GN=pod_1 PE=3 SV=1 - [A0A1D6KAW3_MAIZE]	9.2	3	3	25	337	35.9555	4.70361	0.97659	0.911687	0.927675	0.938651	1.05709	1.06388	1.10469	1.07522	0.872986	0.00510596
B4FBK8	3-ketoacyl-CoA thiolase 2 peroxisomal	100192501	3-ketoacyl-CoA thiolase 2 peroxisomal OS=Zea mays OX=4577 GN=100192501 PE=2 SV=1 - [B4FBK8_MAIZE]	9.11	4	4	11	461	47.9287	8.27979	0.95258	0.9077	0.923377	0.927886	1.0575	1.04886	1.00983	1.03873	0.893288	0.00490469
B4F7S5	Copper ion binding	100272832	Copper ion binding OS=Zea mays OX=4577 GN=100272832 PE=2 SV=1 - [B4F7S5_MAIZE]	9.06	2	2	5	265	29.1018	10.1987	1.15695	1.02567	1.07852	1.08705	0.918096	0.934583	0.875521	0.9094	1.19535	0.0133714
A0A1D6L739	Aldehyde oxidase1	ZEAMMB73_Zm00001d034387	Aldehyde oxidase1 OS=Zea mays OX=4577 GN=ZEAMMB73_Zm00001d034387 PE=4 SV=1 - [A0A1D6L739_MAIZE]	8.96	7	12	26	1306	141.264	6.26514	1.05728	1.05475	1.02347	1.04517	0.975141	0.928493	0.978484	0.960706	1.08792	0.0122425
A0A1D6H2M1	Proteasome subunit beta type	100272320	Proteasome subunit beta type OS=Zea mays OX=4577 GN=100272320 PE=4 SV=1 - [A0A1D6H2M1_MAIZE]	8.9	2	2	4	191	21.4877	5.42725	0.899581	0.960857	0.910863	0.923767	1.02724	1.04526	1.05878	1.04376	0.885036	0.00458288
A0A317YGC0	Expansin-B4	Zm00014a_032967	Expansin-B4 OS=Zea mays OX=4577 GN=Zm00014a_032967 PE=3 SV=1 - [A0A317YGC0_MAIZE]	8.87	2	3	8	282	31.1461	7.88428	0.949285	0.903428	0.865628	0.906114	0.992337	1.01554	1.03024	1.0127	0.894747	0.0160029
B4FYH1	Peroxidase	100273989	Peroxidase OS=Zea mays OX=4577 GN=100273989 PE=2 SV=1 - [B4FYH1_MAIZE]	8.86	2	3	11	361	37.9119	6.37939	0.931923	1.00479	0.925595	0.954103	1.0153	1.12155	1.15421	1.09702	0.86972	0.0434655
A0A1D6KSQ7	Threonine--tRNA ligase mitochondrial 1	103643444	Threonine--tRNA ligase mitochondrial 1 OS=Zea mays OX=4577 GN=103643444 PE=3 SV=1 - [A0A1D6KSQ7_MAIZE]	8.82	1	7	13	737	84.4139	7.38623	0.975276		0.9675	0.971388	1.00771		1.01592	1.01182	0.960043	0.0190153
A0A1D6HL48	Phenylalanine--tRNA ligase alpha subunit cytoplasmic	ZEAMMB73_Zm00001d018147	Phenylalanine--tRNA ligase alpha subunit cytoplasmic OS=Zea mays OX=4577 GN=ZEAMMB73_Zm00001d018147 PE=4 SV=1 - [A0A1D6HL48_MAIZE]	8.71	4	4	16	482	54.2505	6.12549	0.872076	0.894688	0.931436	0.8994	1.02114	1.03927	1.01521	1.02521	0.877285	0.00256797
B6SHH4	Lysine--tRNA ligase		Lysine--tRNA ligase OS=Zea mays OX=4577 PE=2 SV=1 - [B6SHH4_MAIZE]	8.63	2	6	19	614	69.2368	6.30322	1.14599	1.09121	1.15621	1.13114	1.00094	0.970775	0.889532	0.95375	1.18599	0.0103479
A0A1D6H4R4	Prolyl oligopeptidase family protein	100381646	Prolyl oligopeptidase family protein OS=Zea mays OX=4577 GN=100381646 PE=3 SV=1 - [A0A1D6H4R4_MAIZE]	8.54	6	6	11	796	88.8657	6.48096	0.933771	0.903086	0.947984	0.92828	0.992991	1.01137	1.09075	1.0317	0.899756	0.0343821
B6TQY2	Serine/threonine-protein phosphatase 2A activator		Serine/threonine-protein phosphatase 2A activator OS=Zea mays OX=4577 PE=2 SV=1 - [B6TQY2_MAIZE]	8.53	3	3	6	387	41.9185	7.02002	1.00391	1.0106	1.02924	1.01458	0.994874	0.989007	0.99215	0.99201	1.02275	0.0438248
A0A1D6DVI8	Putative phosphoribosylformylglycinamidine synthase chloroplastic/mitochondrial	ZEAMMB73_Zm00001d002003	Putative phosphoribosylformylglycinamidine synthase chloroplastic/mitochondrial OS=Zea mays OX=4577 GN=ZEAMMB73_Zm00001d002003 PE=3 SV=1 - [A0A1D6DVI8_MAIZE]	8.46	4	11	25	1335	146.438	5.59229	0.923829	0.86089	0.862717	0.882479	1.00143	1.05196	1.10743	1.0536	0.837581	0.0097909
A0A1D6KMS8	Vignain	ZEAMMB73_Zm00001d031971	Vignain OS=Zea mays OX=4577 GN=ZEAMMB73_Zm00001d031971 PE=3 SV=1 - [A0A1D6KMS8_MAIZE]	8.46	2	2	7	260	27.6722	5.63037	0.913275	0.927106	0.966194	0.935525	1.11437	1.13062	1.07187	1.10562	0.846152	0.00197024
B4FDI3	Mog1/PsbP/DUF1795-like photosystem II reaction center PsbP family protein	ZEAMMB73_Zm00001d003428	Mog1/PsbP/DUF1795-like photosystem II reaction center PsbP family protein OS=Zea mays OX=4577 GN=ZEAMMB73_Zm00001d003428 PE=2 SV=1 - [B4FDI3_MAIZE]	8.42	2	2	3	202	21.55	4.50049	0.974562	0.870628	0.924307	0.923166	1.04668	1.09098	1.12283	1.08683	0.84941	0.0117552
A0A1D6IYV8	26S proteasome non-ATPase regulatory subunit 1 homolog	ZEAMMB73_Zm00001d024342	26S proteasome non-ATPase regulatory subunit 1 homolog OS=Zea mays OX=4577 GN=ZEAMMB73_Zm00001d024342 PE=3 SV=1 - [A0A1D6IYV8_MAIZE]	8.38	2	8	26	991	106.992	5.30029	0.944816	0.875192	0.983245	0.934418	1.03182	1.05691	1.13764	1.07545	0.868858	0.0348901
A0A1D6I2Q6	Protein arginine N-methyltransferase 1.1	ZEAMMB73_Zm00001d020188	Protein arginine N-methyltransferase 1.1 OS=Zea mays OX=4577 GN=ZEAMMB73_Zm00001d020188 PE=3 SV=1 - [A0A1D6I2Q6_MAIZE]	8.33	1	1	2	144	15.9974	5.57959		1.0369	1.05417	1.04553		0.934618	0.969208	0.951913	1.09835	0.0400866
A0A1D6PF34	Senescence/dehydration-associated protein-related	100191434	Senescence/dehydration-associated protein-related OS=Zea mays OX=4577 GN=100191434 PE=4 SV=1 - [A0A1D6PF34_MAIZE]	8.29	3	3	10	422	45.6543	6.0874	0.905182	0.936441	0.95154	0.931054	0.984654	1.02623	1.03514	1.01534	0.916988	0.0151935
A0A1D6LWQ8	Ketose-bisphosphate aldolase class-II family protein	100280420	Ketose-bisphosphate aldolase class-II family protein OS=Zea mays OX=4577 GN=100280420 PE=4 SV=1 - [A0A1D6LWQ8_MAIZE]	8.25	10	10	20	1322	141.723	6.1001	1.16413	1.03571	1.03173	1.07719	0.958029	0.910864	0.930016	0.93297	1.15458	0.0340688
A0A1D6Q3W4	Ribosomal RNA processing Brix domain protein	100284070	Ribosomal RNA processing Brix domain protein OS=Zea mays OX=4577 GN=100284070 PE=4 SV=1 - [A0A1D6Q3W4_MAIZE]	8.16	2	2	4	245	28.2846	9.27588	0.82333	0.914371	0.908078	0.881926	1.13574	1.01135	0.976882	1.04132	0.846927	0.0477021
K7VV41	Amidophosphoribosyltransferase	103635621	Amidophosphoribosyltransferase OS=Zea mays OX=4577 GN=103635621 PE=3 SV=1 - [K7VV41_MAIZE]	8.15	3	4	9	540	58.0577	7.26904	1.0885	1.08849	0.998601	1.05853	0.948807	0.977844	0.971394	0.966015	1.09577	0.0414611
A0A1D6F0H0	Pentatricopeptide repeat-containing protein mitochondrial	ZEAMMB73_Zm00001d006769	Pentatricopeptide repeat-containing protein mitochondrial OS=Zea mays OX=4577 GN=ZEAMMB73_Zm00001d006769 PE=4 SV=1 - [A0A1D6F0H0_MAIZE]	8.11	2	2	6	296	32.7972	6.78564	1.19071	1.05066	1.16072	1.13403	0.985448	1.01695	0.887476	0.963291	1.17725	0.0416462
C0PGE5	Nucleic acid-binding OB-fold-like protein	100281965	Nucleic acid-binding OB-fold-like protein OS=Zea mays OX=4577 GN=100281965 PE=2 SV=1 - [C0PGE5_MAIZE]	7.98	1	1	3	188	20.2433	7.89893	1.18657	1.14153	1.05508	1.12773	0.911236	0.950368	1.00277	0.954789	1.18113	0.0209432
A0A1D6E4T9	Putative beta-D-xylosidase 6	ZEAMMB73_Zm00001d002853	Putative beta-D-xylosidase 6 OS=Zea mays OX=4577 GN=ZEAMMB73_Zm00001d002853 PE=4 SV=1 - [A0A1D6E4T9_MAIZE]	7.83	6	6	15	766	82.5383	6.30322	0.988108	0.931978	0.866131	0.928739	1.04041	1.10967	1.17127	1.10712	0.83888	0.0260188
A0A1D6LCE8	Transducin/WD40 repeat-like superfamily protein	100382756	Transducin/WD40 repeat-like superfamily protein OS=Zea mays OX=4577 GN=100382756 PE=4 SV=1 - [A0A1D6LCE8_MAIZE]	7.73	3	3	6	440	46.8873	8.79248	1.06474	1.02723	1.0356	1.04252	0.996546	0.947229	0.967714	0.970496	1.07422	0.0169315
A0A1D6GPB2	Peptide-N4-(N-acetyl-beta-glucosaminyl)asparagine amidase A protein	ZEAMMB73_Zm00001d013995	Peptide-N4-(N-acetyl-beta-glucosaminyl)asparagine amidase A protein OS=Zea mays OX=4577 GN=ZEAMMB73_Zm00001d013995 PE=4 SV=1 - [A0A1D6GPB2_MAIZE]	7.59	4	4	5	646	69.7053	7.21045	1.17644	1.24247	1.06027	1.15972	0.957363	1.0403	0.962431	0.986699	1.17536	0.0440664
A0A1D6HXH9	DEAD-box ATP-dependent RNA helicase 5	100383160	DEAD-box ATP-dependent RNA helicase 5 OS=Zea mays OX=4577 GN=100383160 PE=4 SV=1 - [A0A1D6HXH9_MAIZE]	7.53	2	2	3	279	31.2372	7.26904	1.07976	1.05076		1.06526	0.96175	0.959702		0.960726	1.10881	0.018798
A0A1D6MXS7	Glutathione synthetase	ZEAMMB73_Zm00001d041710	Glutathione synthetase OS=Zea mays OX=4577 GN=ZEAMMB73_Zm00001d041710 PE=3 SV=1 - [A0A1D6MXS7_MAIZE]	7.4	2	2	4	392	43.7674	6.27783		0.943789	0.945895	0.944842		1.03094	1.02875	1.02984	0.917462	0.000318304
A0A1D6P7Q6	Uncharacterized protein	100276254	Uncharacterized protein OS=Zea mays OX=4577 GN=100276254 PE=4 SV=1 - [A0A1D6P7Q6_MAIZE]	7.34	2	2	8	259	27.5485	9.53955	1.00181	0.998841	0.938158	0.979604	1.07711	1.15424	1.0932	1.10819	0.88397	0.0148136
A0A1D6GZY9	Cleavage and polyadenylation specificity factor (CPSF) A subunit protein	100272422	Cleavage and polyadenylation specificity factor (CPSF) A subunit protein OS=Zea mays OX=4577 GN=100272422 PE=4 SV=1 - [A0A1D6GZY9_MAIZE]	7.24	7	7	16	1188	131.173	5.69385	0.838821	0.918339	0.930119	0.89576	1.08197	0.964462	1.01969	1.02204	0.876442	0.0467623
A0A1D6QU24	Anthranilate phosphoribosyltransferase	103654959	Anthranilate phosphoribosyltransferase OS=Zea mays OX=4577 GN=103654959 PE=4 SV=1 - [A0A1D6QU24_MAIZE]	7.16	4	4	7	587	63.5196	7.26904	0.935154	0.980754	0.950294	0.955401	1.07534	1.01262	1.11986	1.06927	0.893507	0.0282589
K7TT54	Uncharacterized protein	103642150	Uncharacterized protein OS=Zea mays OX=4577 GN=103642150 PE=4 SV=1 - [K7TT54_MAIZE]	7.14	1	1	4	182	19.4345	5.92236	0.947486	0.955014	0.988489	0.963663	1.04426	1.03427	1.02781	1.03545	0.930675	0.00598494
B6TNI0	Uncharacterized protein	100277064	Uncharacterized protein OS=Zea mays OX=4577 GN=100277064 PE=2 SV=1 - [B6TNI0_MAIZE]	7.06	1	1	2	170	18.05	9.42236	1.05325	1.05709		1.05517	0.976579	1.00265		0.989614	1.06624	0.0380999
A0A1D6I2K7	Proton pump-interactor 1	103632614	Proton pump-interactor 1 OS=Zea mays OX=4577 GN=103632614 PE=4 SV=1 - [A0A1D6I2K7_MAIZE]	6.99	2	4	15	472	52.7539	9.12939	0.882842	0.87292	0.966844	0.907535	1.01557	1.12681	1.06213	1.06817	0.849615	0.0216079
B6TSW1	Shikimate dehydrogenase		Shikimate dehydrogenase OS=Zea mays OX=4577 PE=2 SV=1 - [B6TSW1_MAIZE]	6.85	3	4	14	540	57.9499	6.23975	0.909947	0.897448	0.934478	0.913958	1.05439	1.06957	1.02233	1.04876	0.871462	0.00158499
A0A1D6L6Q2	AP complex subunit sigma	ZEAMMB73_Zm00001d034337	AP complex subunit sigma OS=Zea mays OX=4577 GN=ZEAMMB73_Zm00001d034337 PE=3 SV=1 - [A0A1D6L6Q2_MAIZE]	6.67	1	1	3	135	15.5481	5.5542	0.79951	0.891604	0.959101	0.883405	1.08052	1.08952	0.977062	1.04903	0.842112	0.0476566
B4FGB4	Uncharacterized protein		Uncharacterized protein OS=Zea mays OX=4577 PE=2 SV=1 - [B4FGB4_MAIZE]	6.65	2	2	8	391	42.113	5.70654	0.909345	0.887144	0.881123	0.892537	1.03616	1.03412	1.12804	1.06611	0.837192	0.00569042
A0A1D6MV11	Sucrose transporter4	ZEAMMB73_Zm00001d041192	Sucrose transporter4 OS=Zea mays OX=4577 GN=ZEAMMB73_Zm00001d041192 PE=4 SV=1 - [A0A1D6MV11_MAIZE]	6.59	3	3	6	501	53.3368	8.52881	1.03562	1.04787	1.09075	1.05808	0.976707	0.871505	0.976938	0.941717	1.12356	0.0402302
C0PHA8	Uncharacterized protein		Uncharacterized protein OS=Zea mays OX=4577 PE=2 SV=1 - [C0PHA8_MAIZE]	6.55	2	2	9	290	30.6817	4.99561	1.15263	1.09987	1.12029	1.12426	0.962212	0.977198	0.92622	0.95521	1.17698	0.0014285
A0A1D6KBW7	Hsp20/alpha crystallin family protein	ZEAMMB73_Zm00001d030317	Hsp20/alpha crystallin family protein OS=Zea mays OX=4577 GN=ZEAMMB73_Zm00001d030317 PE=3 SV=1 - [A0A1D6KBW7_MAIZE]	6.49	1	1	3	185	20.1736	8.74854	0.969849	0.958437	0.991361	0.973215	1.04651	1.0517	1.00546	1.03456	0.940705	0.0248758
B6THV4	Alliin lyase		Alliin lyase OS=Zea mays OX=4577 PE=2 SV=1 - [B6THV4_MAIZE]	6.38	3	3	11	486	53.4752	6.32861	0.922406	1.05115	0.952845	0.975466	1.11629	1.11581	1.10394	1.11201	0.877208	0.0249852
B8A3I9	Uncharacterized protein		Uncharacterized protein OS=Zea mays OX=4577 PE=2 SV=1 - [B8A3I9_MAIZE]	6.35	2	2	3	378	40.5046	6.85889	0.970965	0.934575		0.95277	1.04191	1.06251		1.05221	0.905494	0.041474
A0A1D6FDW3	Uncharacterized protein	ZEAMMB73_Zm00001d008558	Uncharacterized protein OS=Zea mays OX=4577 GN=ZEAMMB73_Zm00001d008558 PE=4 SV=1 - [A0A1D6FDW3_MAIZE]	6.32	1	1	2	174	17.9217	10.4331	1.01876	1.00514		1.01195	0.938625	0.937323		0.937974	1.07887	0.00844911
A0A1D6PGX2	Methionine--tRNA ligase cytoplasmic	103639438	Methionine--tRNA ligase cytoplasmic OS=Zea mays OX=4577 GN=103639438 PE=3 SV=1 - [A0A1D6PGX2_MAIZE]	6.23	1	4	8	626	69.8525	8.14795	0.896425	0.926347	0.942262	0.921678	1.08119	1.07556	1.03599	1.06425	0.866038	0.00188535
C0PP57	Uncharacterized protein		Uncharacterized protein OS=Zea mays OX=4577 PE=2 SV=1 - [C0PP57_MAIZE]	6.17	2	3	7	454	50.1861	5.50342	0.955903	1.00395	0.934326	0.964725	1.03968	1.09398	1.16231	1.09866	0.878096	0.030916
B4FB95	Peroxidase		Peroxidase OS=Zea mays OX=4577 PE=2 SV=1 - [B4FB95_MAIZE]	6.14	1	2	6	342	35.5793	7.40088	1.06635		1.04793	1.05714	0.958804		0.973068	0.965936	1.09442	0.0159307
K7UCA4	Myosin heavy chain-related	ZEAMMB73_Zm00001d049764	Myosin heavy chain-related OS=Zea mays OX=4577 GN=ZEAMMB73_Zm00001d049764 PE=4 SV=1 - [K7UCA4_MAIZE]	6.14	3	3	7	456	50.8652	9.56885	1.02327	1.03258	1.0261	1.02732	0.985116	0.930556	0.920842	0.945505	1.08653	0.0154533
A0A1D6P0F0	HGA4	100282802	HGA4 OS=Zea mays OX=4577 GN=100282802 PE=4 SV=1 - [A0A1D6P0F0_MAIZE]	6.11	3	3	7	458	51.3444	8.1333	0.973674	0.962843	0.978815	0.971777	1.00859	0.992372	0.990656	0.997205	0.9745	0.0264069
A0A1D6Q002	Putative sucrose-phosphate synthase family protein isoform 1	100384028	Putative sucrose-phosphate synthase family protein isoform 1 OS=Zea mays OX=4577 GN=100384028 PE=3 SV=1 - [A0A1D6Q002_MAIZE]	6.09	4	6	13	936	104.322	6.3667	1.12861	1.02398	1.11967	1.09075	0.903554	1.00259	0.914062	0.940068	1.16029	0.0304378
B6TVN1	BCAS2 protein		BCAS2 protein OS=Zea mays OX=4577 PE=2 SV=1 - [B6TVN1_MAIZE]	5.91	2	2	2	254	28.9925	5.93506		0.916348	0.960514	0.938431		1.09963	1.10281	1.10122	0.852172	0.0179987
A0A1D6EC22	Glycine--tRNA ligase mitochondrial 1	100192538	Glycine--tRNA ligase mitochondrial 1 OS=Zea mays OX=4577 GN=100192538 PE=4 SV=1 - [A0A1D6EC22_MAIZE]	5.89	4	4	7	679	75.9088	6.59521	1.11844	1.07961	1.09204	1.0967	1.00148	0.93763	0.931997	0.957034	1.14593	0.00507168
C4JB85	Cytochrome P450 family 96 subfamily A polypeptide 1	ZEAMMB73_Zm00001d008837	Cytochrome P450 family 96 subfamily A polypeptide 1 OS=Zea mays OX=4577 GN=ZEAMMB73_Zm00001d008837 PE=2 SV=1 - [C4JB85_MAIZE]	5.87	3	3	6	511	56.8094	8.55811	0.946335	0.88537	0.881585	0.90443	0.965804	1.02762	1.03377	1.00906	0.896306	0.0256702
A0A1D6HA35	NDR1/HIN1-like 1	ZEAMMB73_Zm00001d016733	NDR1/HIN1-like 1 OS=Zea mays OX=4577 GN=ZEAMMB73_Zm00001d016733 PE=4 SV=1 - [A0A1D6HA35_MAIZE]	5.85	1	1	3	188	20.3237	8.86572	0.987033	0.965391	0.917184	0.956536	1.07813	1.11742	1.085	1.09351	0.874736	0.0046149
A0A1D6PWV6	COP9 signalosome complex subunit 3	ZEAMMB73_Zm00001d049652	COP9 signalosome complex subunit 3 OS=Zea mays OX=4577 GN=ZEAMMB73_Zm00001d049652 PE=4 SV=1 - [A0A1D6PWV6_MAIZE]	5.71	3	3	5	420	46.5426	6.06201	0.922216	0.944939	1.00446	0.957203	1.00723	1.06754	1.09457	1.05645	0.90606	0.0494456
A0A1D6FF40	Ubiquitinyl hydrolase 1	100383086	Ubiquitinyl hydrolase 1 OS=Zea mays OX=4577 GN=100383086 PE=3 SV=1 - [A0A1D6FF40_MAIZE]	5.7	3	3	9	579	64.9626	5.37646	1.11288	1.15329	1.00735	1.09117	0.9798	0.908662	0.964096	0.950853	1.14757	0.0445852
B6SWS8	DNA helicase		DNA helicase OS=Zea mays OX=4577 PE=2 SV=1 - [B6SWS8_MAIZE]	5.65	4	4	9	850	93.907	6.72705	0.803463	0.897366	0.964952	0.888594	1.1041	1.07218	1.02129	1.06586	0.833689	0.0281559
A0A1D6DST5	K(+) efflux antiporter 2 chloroplastic	103645748	K(+) efflux antiporter 2 chloroplastic OS=Zea mays OX=4577 GN=103645748 PE=4 SV=1 - [A0A1D6DST5_MAIZE]	5.57	4	4	9	988	106.143	5.19873	0.951832	0.919608	0.981529	0.95099	1.03086	1.0996	1.0254	1.05195	0.904023	0.0276618
A0A317Y4B4	Uncharacterized protein	Zm00014a_014141	Uncharacterized protein OS=Zea mays OX=4577 GN=Zm00014a_014141 PE=4 SV=1 - [A0A317Y4B4_MAIZE]	5.5	2	2	3	382	41.1809	4.84326		0.929528	0.916481	0.923004		1.00173	1.03249	1.01711	0.907476	0.0300956
A0A1D6JJP0	GroES-like zinc-binding alcohol dehydrogenase family protein	103630457	GroES-like zinc-binding alcohol dehydrogenase family protein OS=Zea mays OX=4577 GN=103630457 PE=4 SV=2 - [A0A1D6JJP0_MAIZE]	5.38	2	2	4	372	39.4364	8.17725	0.8642	1.0134	0.907119	0.928241	1.0774	1.04472	1.17455	1.09889	0.844709	0.044565
A0A1D6IKW3	DExH-box ATP-dependent RNA helicase DExH12	103633484	DExH-box ATP-dependent RNA helicase DExH12 OS=Zea mays OX=4577 GN=103633484 PE=4 SV=1 - [A0A1D6IKW3_MAIZE]	5.31	10	10	20	2184	246.673	5.89697	0.895804	0.982319	0.941272	0.939798	1.07383	0.995344	1.10101	1.05673	0.889348	0.0442025
K7U3U3	Eukaryotic aspartyl protease family protein	ZEAMMB73_Zm00001d025541	Eukaryotic aspartyl protease family protein OS=Zea mays OX=4577 GN=ZEAMMB73_Zm00001d025541 PE=3 SV=1 - [K7U3U3_MAIZE]	5.26	2	2	5	475	48.6043	6.03662	1.06819	1.13073	1.05149	1.08347	0.966872	0.993762	0.893736	0.951456	1.13875	0.0263531
A0A1D6LSV5	ATP/GTP-binding protein family	103629816	ATP/GTP-binding protein family OS=Zea mays OX=4577 GN=103629816 PE=4 SV=1 - [A0A1D6LSV5_MAIZE]	5.19	2	4	7	770	86.9207	8.49951	0.917405	0.905909	0.930258	0.917857	1.05122	1.11665	1.05668	1.07485	0.853942	0.00207692
A0A317YL57	Subtilisin-like protease SBT3.18	SBT3.18	Subtilisin-like protease SBT3.18 OS=Zea mays OX=4577 GN=SBT3.18 PE=4 SV=1 - [A0A317YL57_MAIZE]	5.09	4	5	15	1337	143.075	6.771	0.976376	0.996461	0.965702	0.979513	1.04065	1.02981	1.1173	1.06259	0.921819	0.0455912
A0A1D6ML83	Protein SUPPRESSOR OF GENE SILENCING 3	ZEAMMB73_Zm00001d039815	Protein SUPPRESSOR OF GENE SILENCING 3 OS=Zea mays OX=4577 GN=ZEAMMB73_Zm00001d039815 PE=4 SV=1 - [A0A1D6ML83_MAIZE]	5.08	1	2	3	394	43.9447	5.74463	0.882016		0.896414	0.889215	1.02545		1.07312	1.04929	0.847447	0.0233456
A0A1D6PN70	DEAD-box ATP-dependent RNA helicase 40	ZEAMMB73_Zm00001d048632	DEAD-box ATP-dependent RNA helicase 40 OS=Zea mays OX=4577 GN=ZEAMMB73_Zm00001d048632 PE=3 SV=1 - [A0A1D6PN70_MAIZE]	5.01	2	3	9	679	71.9945	10.9019	0.991374	0.956115	0.934672	0.96072	1.05178	1.00685	1.06486	1.04117	0.922735	0.0289721
A0A1D6NER6	Putative phosphoethanolamine N-methyltransferase	103651303	Putative phosphoethanolamine N-methyltransferase OS=Zea mays OX=4577 GN=103651303 PE=4 SV=1 - [A0A1D6NER6_MAIZE]	4.99	2	2	5	501	56.8453	5.61768	0.935105	0.885347	0.837972	0.886141	1.01296	0.998205	1.15191	1.05436	0.840455	0.0406865
A0A1D6IKN7	Pectin acetylesterase	100274042	Pectin acetylesterase OS=Zea mays OX=4577 GN=100274042 PE=3 SV=1 - [A0A1D6IKN7_MAIZE]	4.96	1	1	2	242	27.1269	8.11865	1.13636	1.10475		1.12055	0.932402	0.952712		0.942557	1.18884	0.0109566
A0A1D6HFJ6	tRNA pseudouridine synthase	100283773	tRNA pseudouridine synthase OS=Zea mays OX=4577 GN=100283773 PE=3 SV=1 - [A0A1D6HFJ6_MAIZE]	4.89	2	2	4	450	48.9244	8.27979	0.889218	0.905854	0.881263	0.892112	1.03929	1.02221	1.06732	1.04294	0.855383	0.000551909
A0A1D6Q5P0	Alcohol dehydrogenase-like 6	100272578	Alcohol dehydrogenase-like 6 OS=Zea mays OX=4577 GN=100272578 PE=3 SV=1 - [A0A1D6Q5P0_MAIZE]	4.86	2	2	8	329	35.0296	8.04541	1.12612	1.04135	1.13192	1.09979	0.996668	0.937968	0.947721	0.960786	1.14468	0.0156623
A0A1D6K829	Late embryogenesis abundant (LEA) hydroxyproline-rich glycoprotein family	NHL3_0	Late embryogenesis abundant (LEA) hydroxyproline-rich glycoprotein family OS=Zea mays OX=4577 GN=NHL3_0 PE=4 SV=1 - [A0A1D6K829_MAIZE]	4.76	1	1	3	210	22.9653	10.4771	0.931159	0.883968	0.949833	0.921653	1.01079	1.0936	1.04394	1.04944	0.878232	0.0146398
A0A1D6N9K8	Polyphenol oxidase chloroplastic	103651121	Polyphenol oxidase chloroplastic OS=Zea mays OX=4577 GN=103651121 PE=4 SV=1 - [A0A1D6N9K8_MAIZE]	4.69	3	3	9	597	65.4951	7.97217	0.890778	0.925658	0.854633	0.890357	1.04196	1.01663	1.10742	1.05534	0.84367	0.00827606
C0PFM8	Protein RETICULATA-RELATED 3 chloroplastic	100383393	Protein RETICULATA-RELATED 3 chloroplastic OS=Zea mays OX=4577 GN=100383393 PE=2 SV=1 - [C0PFM8_MAIZE]	4.68	1	1	7	342	35.1172	9.71533	0.952725	0.891005	0.944106	0.929279	0.970455	1.00665	1.00813	0.995075	0.933878	0.0452869
B4FLG7	Triphosphate tunel metalloenzyme 3	100217115	Triphosphate tunel metalloenzyme 3 OS=Zea mays OX=4577 GN=100217115 PE=2 SV=1 - [B4FLG7_MAIZE]	4.67	1	1	2	214	23.5091	5.2749		1.10624	1.07388	1.09006		0.964647	0.910923	0.937785	1.16238	0.039895
A0A1D6GWG3	Protein FREE1	ZEAMMB73_Zm00001d014808	Protein FREE1 OS=Zea mays OX=4577 GN=ZEAMMB73_Zm00001d014808 PE=4 SV=1 - [A0A1D6GWG3_MAIZE]	4.5	2	2	5	378	40.1386	6.91748	1.15713	1.22668	1.02984	1.13788	0.979308	0.95305	0.955967	0.962775	1.18188	0.0396603
B4G050	S-adenosyl-L-methionine-dependent methyltransferase superfamily protein	100274302	S-adenosyl-L-methionine-dependent methyltransferase superfamily protein OS=Zea mays OX=4577 GN=100274302 PE=2 SV=1 - [B4G050_MAIZE]	4.42	1	1	5	294	31.6144	4.51318	0.945272	0.917478	0.961786	0.941512	1.05427	1.0522	1.08395	1.06347	0.885318	0.00178704
A0A1D6HF19	Chaperone protein dnaJ 3	100216704	Chaperone protein dnaJ 3 OS=Zea mays OX=4577 GN=100216704 PE=4 SV=1 - [A0A1D6HF19_MAIZE]	4.4	2	2	7	409	45.7745	6.88818	1.12813	1.08321	0.977869	1.06307	0.886759	0.889377	0.915172	0.897103	1.185	0.0217308
A0A1D6M369	Uncharacterized protein	103630318	Uncharacterized protein OS=Zea mays OX=4577 GN=103630318 PE=4 SV=1 - [A0A1D6M369_MAIZE]	4.37	3	3	8	778	86.7777	7.35693	0.871788	0.949626	0.872367	0.897927	1.08687	1.02956	1.10954	1.07533	0.835028	0.00723761
A0A1D6NKU7	SIT4 phosphatase-associated family protein	103652598	SIT4 phosphatase-associated family protein OS=Zea mays OX=4577 GN=103652598 PE=4 SV=1 - [A0A1D6NKU7_MAIZE]	4.32	2	2	5	440	48.8508	5.64307	1.08839	1.01804	1.0829	1.06311	0.965836	0.942476	0.922292	0.943535	1.12673	0.00985031
A0A1D6IF39	FAD/NAD(P)-binding oxidoreductase family protein	ZEAMMB73_Zm00001d021758	FAD/NAD(P)-binding oxidoreductase family protein OS=Zea mays OX=4577 GN=ZEAMMB73_Zm00001d021758 PE=4 SV=1 - [A0A1D6IF39_MAIZE]	4.22	1	1	3	237	26.2165	6.72705	1.02046	0.869146	0.875854	0.92182	1.06731	1.07999	1.10506	1.08412	0.850291	0.0326422
A0A1D6H6Q2	Metallopeptidase M24 family protein	ZEAMMB73_Zm00001d016311	Metallopeptidase M24 family protein OS=Zea mays OX=4577 GN=ZEAMMB73_Zm00001d016311 PE=3 SV=1 - [A0A1D6H6Q2_MAIZE]	3.85	1	2	5	416	46.394	6.29053	0.97057	0.890326	0.8891	0.916665	1.03601	1.03002	1.03906	1.03503	0.88564	0.0119662
K7U3F5	Exocyst complex component SEC5	103641640	Exocyst complex component SEC5 OS=Zea mays OX=4577 GN=103641640 PE=3 SV=1 - [K7U3F5_MAIZE]	3.81	4	4	8	1101	123.031	5.89697	0.885225	0.965872	0.950708	0.933935	1.00975	1.05616	1.03986	1.03526	0.902127	0.0229859
C0P4U5	Uncharacterized protein	100382145	Uncharacterized protein OS=Zea mays OX=4577 GN=100382145 PE=2 SV=1 - [C0P4U5_MAIZE]	3.58	1	1	5	335	37.2985	6.94678	0.888649	0.915334	0.877393	0.893792	1.06794	1.14454	0.966879	1.05979	0.84337	0.0344495
A0A1D6FHK9	Putative beta-D-xylosidase 5	100280070	Putative beta-D-xylosidase 5 OS=Zea mays OX=4577 GN=100280070 PE=4 SV=1 - [A0A1D6FHK9_MAIZE]	3.55	2	2	4	619	66.7969	5.51611	1.19018	1.03885	1.11912	1.11605	0.882075	1.01352	0.939642	0.94508	1.18091	0.0419501
A0A1D6EXV7	Eukaryotic translation initiation factor 4G	103647746	Eukaryotic translation initiation factor 4G OS=Zea mays OX=4577 GN=103647746 PE=4 SV=1 - [A0A1D6EXV7_MAIZE]	3.53	2	7	22	1785	194.017	7.76709	0.917852	0.856827	0.924015	0.899565	1.02252	1.07875	1.00619	1.03582	0.868458	0.0113548
A0A1D6K830	Translocase of chloroplast 120 chloroplastic	TOC120	Translocase of chloroplast 120 chloroplastic OS=Zea mays OX=4577 GN=TOC120 PE=4 SV=1 - [A0A1D6K830_MAIZE]	3.41	3	3	3	997	108.33	5.35107	0.975925	0.976231		0.976078	0.988909	0.98475		0.98683	0.989105	0.0356084
A0A1D6QQG4	Protein CLP1-like protein	100284798	Protein CLP1-like protein OS=Zea mays OX=4577 GN=100284798 PE=3 SV=1 - [A0A1D6QQG4_MAIZE]	3.21	1	1	3	280	29.8355	5.47803	0.927317	0.897888	0.938545	0.92125	0.981625	1.12403	1.05888	1.05484	0.873352	0.035746
A0A1D6LY56	Alkaline alpha galactosidase 2	ZEAMMB73_Zm00001d037480	Alkaline alpha galactosidase 2 OS=Zea mays OX=4577 GN=ZEAMMB73_Zm00001d037480 PE=4 SV=1 - [A0A1D6LY56_MAIZE]	3.2	3	3	6	843	90.5417	6.56592	0.888608	0.947911	0.855156	0.897225	1.0857	1.01723	1.08071	1.06121	0.845472	0.00936024
A0A1D6LHF3	E3 UFM1-protein ligase 1-like protein	103629212	E3 UFM1-protein ligase 1-like protein OS=Zea mays OX=4577 GN=103629212 PE=4 SV=1 - [A0A1D6LHF3_MAIZE]	3.04	2	2	5	624	68.3564	6.50732		0.942763	0.916005	0.929384		1.04091	1.04862	1.04477	0.889561	0.0142496
A0A1D6PNP9	AAA-type ATPase family protein	103652718	AAA-type ATPase family protein OS=Zea mays OX=4577 GN=103652718 PE=4 SV=1 - [A0A1D6PNP9_MAIZE]	2.85	2	2	4	737	81.8052	6.78564	0.927552	0.924074	0.954993	0.935539	1.01228	0.990746	1.00203	1.00168	0.933967	0.00465735
C0PKH8	Uncharacterized protein		Uncharacterized protein OS=Zea mays OX=4577 PE=2 SV=1 - [C0PKH8_MAIZE]	2.78	1	1	2	360	41.2804	5.24951	0.869785		0.910622	0.890204	1.0569		1.04881	1.05285	0.845515	0.0159876
A0A1D6PRM1	Trypsin family protein with PDZ domain	100277723	Trypsin family protein with PDZ domain OS=Zea mays OX=4577 GN=100277723 PE=4 SV=1 - [A0A1D6PRM1_MAIZE]	2.67	1	1	2	337	35.3201	7.62061	0.93239	0.969971		0.951181	1.04619	1.04444		1.04531	0.909947	0.0376895
A0A1D6GJK8	Protein CASP	103625954	Protein CASP OS=Zea mays OX=4577 GN=103625954 PE=4 SV=1 - [A0A1D6GJK8_MAIZE]	2.63	2	2	3	532	60.788	4.99561	0.957366		0.944652	0.951009	1.00953		1.02678	1.01815	0.934055	0.0245292
A0A1D6ED25	DnaJ domain	ZEAMMB73_Zm00001d004033	DnaJ domain OS=Zea mays OX=4577 GN=ZEAMMB73_Zm00001d004033 PE=4 SV=1 - [A0A1D6ED25_MAIZE]	2.6	2	2	4	653	73.2102	7.72314	1.05394	1.22286	1.0459	1.10757	0.947634	0.877227	0.961684	0.928848	1.19241	0.0477358
A0A317YJL5	GDSL esterase/lipase	Zm00014a_040838	GDSL esterase/lipase OS=Zea mays OX=4577 GN=Zm00014a_040838 PE=4 SV=1 - [A0A317YJL5_MAIZE]	2.59	1	1	2	386	41.5571	8.35303		0.910354	0.942571	0.926463		1.10716	1.05319	1.08017	0.857697	0.0393524
A0A1D6L054	HIPL1 protein	103643833	HIPL1 protein OS=Zea mays OX=4577 GN=103643833 PE=4 SV=1 - [A0A1D6L054_MAIZE]	2.57	1	2	3	661	70.2797	6.66846	0.861542		0.833912	0.847727	0.984037		1.02993	1.00698	0.841847	0.0271401
K7UAY1	Uncharacterized protein	ZEAMMB73_562811	Uncharacterized protein OS=Zea mays OX=4577 GN=ZEAMMB73_562811 PE=4 SV=1 - [K7UAY1_MAIZE]	2.54	3	3	7	1221	134.967	5.73193	0.854135	0.939473	0.949237	0.914281	1.062	1.05141	1.11455	1.07599	0.849713	0.0108526
A0A1D6LPV5	Peptidyl-prolyl cis-trans isomerase CYP59	ZEAMMB73_Zm00001d036620	Peptidyl-prolyl cis-trans isomerase CYP59 OS=Zea mays OX=4577 GN=ZEAMMB73_Zm00001d036620 PE=4 SV=1 - [A0A1D6LPV5_MAIZE]	2.46	1	1	2	447	51.3649	5.77002	1.06015	1.08814		1.07414	0.903197	0.924828		0.914013	1.17519	0.0119823
A0A1D6IP33	LON protease2	ZEAMMB73_Zm00001d022560	LON protease2 OS=Zea mays OX=4577 GN=ZEAMMB73_Zm00001d022560 PE=4 SV=1 - [A0A1D6IP33_MAIZE]	2.44	1	1	3	451	50.9326	6.20166	1.00402	1.03091	1.07835	1.03776	0.972525	0.912474	0.90326	0.92942	1.11657	0.0243025
A0A1D6KJ43	UvrB/uvrC motif family protein	ZEAMMB73_Zm00001d031489	UvrB/uvrC motif family protein OS=Zea mays OX=4577 GN=ZEAMMB73_Zm00001d031489 PE=4 SV=1 - [A0A1D6KJ43_MAIZE]	2.43	2	2	3	781	85.4347	4.77979	1.09787	1.12201		1.10994	0.948217	0.961325		0.954771	1.16252	0.0077438
B6U6R3	12-oxophytodienoate reductase 2		12-oxophytodienoate reductase 2 OS=Zea mays OX=4577 PE=2 SV=1 - [B6U6R3_MAIZE]	2.4	1	1	3	375	41.4116	5.49072	1.10495	1.14523	1.0415	1.09722	0.942946	0.902544	0.988949	0.944813	1.16131	0.0176798
C0PMF6	4-hydroxyphenylpyruvate dioxygenase		4-hydroxyphenylpyruvate dioxygenase OS=Zea mays OX=4577 PE=2 SV=1 - [C0PMF6_MAIZE]	2.35	1	1	3	426	45.1795	5.77002	0.864765	0.905258	0.942575	0.904199	1.02573	1.03293	0.960184	1.00628	0.898557	0.0340246
A0A1D6HQQ4	DDRGK domain-containing protein 1	100272547	DDRGK domain-containing protein 1 OS=Zea mays OX=4577 GN=100272547 PE=4 SV=1 - [A0A1D6HQQ4_MAIZE]	2.3	1	1	2	305	34.503	5.21143	0.936217	0.940584		0.938401	1.09906	1.07738		1.08822	0.862326	0.00540732
B4FNT8	Aldolase like	100272469	Aldolase like OS=Zea mays OX=4577 GN=100272469 PE=2 SV=1 - [B4FNT8_MAIZE]	2.29	1	1	3	350	37.4021	5.77002	1.16485	1.16051	1.05627	1.12721	0.88003	0.97979	0.960499	0.940107	1.19903	0.0161907
A0A1D6FSY4	Pseudouridine synthase family protein	100280058	Pseudouridine synthase family protein OS=Zea mays OX=4577 GN=100280058 PE=4 SV=1 - [A0A1D6FSY4_MAIZE]	2.12	1	1	2	519	57.105	7.34229	1.0473	1.02129		1.03429	0.95484	0.944779		0.94981	1.08895	0.02618
A0A1D6LJ42	Protein MEI2-like 5	103629361	Protein MEI2-like 5 OS=Zea mays OX=4577 GN=103629361 PE=4 SV=1 - [A0A1D6LJ42_MAIZE]	2.09	2	2	5	765	84.8379	6.59521	0.897991	0.92242	0.919593	0.913334	1.06977	1.07929	1.08284	1.0773	0.8478	4.55374e-05
A0A1D6ITR3	Serine/threonine-protein kinase STY46	ZEAMMB73_Zm00001d023510	Serine/threonine-protein kinase STY46 OS=Zea mays OX=4577 GN=ZEAMMB73_Zm00001d023510 PE=4 SV=1 - [A0A1D6ITR3_MAIZE]	1.97	1	1	2	407	45.2486	5.92236	0.927611		0.905407	0.916509	1.04073		1.07217	1.05645	0.867538	0.0183922
A0A1D6LXJ6	Proteasome activating protein 200	ZEAMMB73_Zm00001d037401	Proteasome activating protein 200 OS=Zea mays OX=4577 GN=ZEAMMB73_Zm00001d037401 PE=4 SV=1 - [A0A1D6LXJ6_MAIZE]	1.95	2	2	5	1128	126.844	7.32764	1.04023	1.03939	1.09242	1.05734	0.94846	0.939015	0.832997	0.906824	1.16599	0.0212986
A0A1D6KXV7	Transferase	100194375	Transferase OS=Zea mays OX=4577 GN=100194375 PE=4 SV=1 - [A0A1D6KXV7_MAIZE]	1.95	1	1	2	410	44.3666	7.98682		1.01779	1.04567	1.03173		0.94314	0.931449	0.937294	1.10076	0.0246739
A0A1D6LEL6	Disease resistance RPP13-like protein 4	ZEAMMB73_Zm00001d035125	Disease resistance RPP13-like protein 4 OS=Zea mays OX=4577 GN=ZEAMMB73_Zm00001d035125 PE=3 SV=1 - [A0A1D6LEL6_MAIZE]	1.82	2	2	4	1265	140.261	7.6792	0.894112	0.855313		0.874712	1.05177	1.01714		1.03445	0.845579	0.0254912
A0A1D6NZ54	Uncharacterized protein	100191511	Uncharacterized protein OS=Zea mays OX=4577 GN=100191511 PE=4 SV=1 - [A0A1D6NZ54_MAIZE]	1.61	1	1	3	623	67.9957	9.39307	0.905432	0.95665	0.924338	0.928807	1.01259	1.02797	1.00427	1.01494	0.915133	0.00640762
A0A1D6MFW1	Phosphoacetylglucosamine mutase	ZEAMMB73_Zm00001d039361	Phosphoacetylglucosamine mutase OS=Zea mays OX=4577 GN=ZEAMMB73_Zm00001d039361 PE=3 SV=1 - [A0A1D6MFW1_MAIZE]	1.28	1	1	2	624	67.7781	6.99072	0.93801		0.904469	0.92124	1.02592		1.01042	1.01817	0.904799	0.0344579
B4FTE5	FRIGIDA-like protein	100273178	FRIGIDA-like protein OS=Zea mays OX=4577 GN=100273178 PE=2 SV=1 - [B4FTE5_MAIZE]	1.25	1	1	3	639	68.3437	4.71631	0.915003	0.944891	0.971969	0.943954	1.02326	1.0167	1.07719	1.03905	0.908479	0.0196855
A0A1D6HS13	GYF domain-containing protein	103631932	GYF domain-containing protein OS=Zea mays OX=4577 GN=103631932 PE=4 SV=1 - [A0A1D6HS13_MAIZE]	0.98	1	1	5	813	89.4907	5.99854	0.910299	0.972133	0.947659	0.943364	1.00555	1.02169	1.00085	1.00936	0.934614	0.0257333
A0A1D6EE87	Cleavage and polyadenylation specificity factor subunit 1	ZEAMMB73_Zm00001d004154	Cleavage and polyadenylation specificity factor subunit 1 OS=Zea mays OX=4577 GN=ZEAMMB73_Zm00001d004154 PE=4 SV=1 - [A0A1D6EE87_MAIZE]	0.68	1	1	3	1184	128.907	5.87158	0.917432	0.904465	0.870939	0.897612	0.970023	0.99526	1.05146	1.00558	0.892631	0.0177204
B6TIS2	Superoxide dismutase [Cu-Zn]	542722	Superoxide dismutase [Cu-Zn] OS=Zea mays OX=4577 GN=542722 PE=2 SV=1 - [B6TIS2_MAIZE]	81.36	3	7	35	118	11.7738	5.37646	1.15087	0.899379	1.12152	1.05726	0.92374	1.11061	0.866692	0.967015	1.09332	0.451578
A0A1D6N430	Aldolase1	542261	Aldolase1 OS=Zea mays OX=4577 GN=542261 PE=4 SV=1 - [A0A1D6N430_MAIZE]	65.63	5	8	96	128	13.8332	9.39307	1.1634	1.01202	1.06559	1.08033	0.926035	1.00656	0.92828	0.953626	1.13287	0.0701062
B6T4U8	Calmodulin	ZEAMMB73_Zm00001d035095	Calmodulin OS=Zea mays OX=4577 GN=ZEAMMB73_Zm00001d035095 PE=2 SV=1 - [B6T4U8_MAIZE]	65.54	5	9	44	148	16.5454	4.95752	1.0597	0.993286	1.01469	1.02256	1.05029	1.11216	1.02986	1.0641	0.960958	0.258248
Q29SB6	Pathogenesis-related protein 10	100192117	Pathogenesis-related protein 10 OS=Zea mays OX=4577 GN=100192117 PE=2 SV=1 - [Q29SB6_MAIZE]	64.38	7	7	50	160	16.9316	5.5415	1.07783	1.05089	1.26079	1.12983	1.00794	0.85076	0.71857	0.859089	1.31516	0.0638361
B6T056	Superoxide dismutase [Cu-Zn]	ZEAMMB73_Zm00001d022505	Superoxide dismutase [Cu-Zn] OS=Zea mays OX=4577 GN=ZEAMMB73_Zm00001d022505 PE=2 SV=1 - [B6T056_MAIZE]	62.91	3	7	29	151	15.0945	5.8335	1.0052	1.32212	0.890319	1.07255	1.00675	0.904373	1.08021	0.99711	1.07566	0.615721
A0A096SXU4	60S ribosomal protein L35a-2	ZEAMMB73_Zm00001d020201	60S ribosomal protein L35a-2 OS=Zea mays OX=4577 GN=ZEAMMB73_Zm00001d020201 PE=3 SV=1 - [A0A096SXU4_MAIZE]	58.93	4	6	34	112	12.8938	10.521	1.01215	1.04154	1.09659	1.05009	0.944954	1.0432	0.921014	0.969724	1.08288	0.147502
B4FHT1	Annexin	Ann6	Annexin OS=Zea mays OX=4577 GN=Ann6 PE=2 SV=1 - [B4FHT1_MAIZE]	57.64	16	18	65	314	35.3225	7.57666	1.15274	0.897802	0.977582	1.00937	0.863286	0.882637	0.996584	0.914169	1.10414	0.330426
A0A1D6NFC1	ATP synthase subunit beta	103651342	ATP synthase subunit beta OS=Zea mays OX=4577 GN=103651342 PE=3 SV=1 - [A0A1D6NFC1_MAIZE]	57.58	1	21	169	554	59.283	6.3667	0.943292	1.01479		0.979042	1.02558	1.06274		1.04416	0.937637	0.247439
K7TL05	General regulatory factor2	100279512	General regulatory factor2 OS=Zea mays OX=4577 GN=100279512 PE=3 SV=1 - [K7TL05_MAIZE]	57.09	2	16	88	261	29.6109	4.80518	0.992229	0.995663	1.01006	0.999317	1.09106	1.00321	1.09439	1.06289	0.94019	0.104298
A0A1D6GKL8	Glycine-rich RNA-binding, abscisic acid-inducible protein	100194217	Glycine-rich RNA-binding, abscisic acid-inducible protein OS=Zea mays OX=4577 GN=100194217 PE=4 SV=1 - [A0A1D6GKL8_MAIZE]	56.6	10	10	34	159	15.5431	5.60498	0.934487	1.06661	0.943524	0.981541	1.14102	1.1271	1.06085	1.10966	0.884545	0.0600384
B4FQ61	40S ribosomal protein S15a-1	100280177	40S ribosomal protein S15a-1 OS=Zea mays OX=4577 GN=100280177 PE=2 SV=1 - [B4FQ61_MAIZE]	56.15	1	7	46	130	14.7378	9.81787	0.974822	0.988833	1.07933	1.01433	1.02645	1.09239	0.909049	1.0093	1.00498	0.940028
B6TJ93	40S ribosomal protein S15a-1	100217251	40S ribosomal protein S15a-1 OS=Zea mays OX=4577 GN=100217251 PE=2 SV=1 - [B6TJ93_MAIZE]	56.15	1	7	42	130	14.7268	9.81787	1.00314	1.04935	1.06384	1.03878	0.984956	1.0374	0.947023	0.989793	1.04949	0.20013
B4FUK7	Hydroxyproline-rich glycoprotein family protein	ZEAMMB73_Zm00001d022421	Hydroxyproline-rich glycoprotein family protein OS=Zea mays OX=4577 GN=ZEAMMB73_Zm00001d022421 PE=2 SV=1 - [B4FUK7_MAIZE]	56.08	11	17	93	337	37.8574	7.18115	1.04103	1.13098	1.1337	1.1019	1.04268	0.915717	0.878662	0.945685	1.16519	0.0551298
A0A1D6KZK2	Cox19-like CHCH family protein	100283861	Cox19-like CHCH family protein OS=Zea mays OX=4577 GN=100283861 PE=4 SV=1 - [A0A1D6KZK2_MAIZE]	55.29	4	4	13	85	8.89617	6.25244	1.00308	1.04922	0.953288	1.00186	1.02036	1.08664	0.968023	1.02501	0.977419	0.627466
B4F9R4	60S ribosomal protein L2	100191681	60S ribosomal protein L2 OS=Zea mays OX=4577 GN=100191681 PE=2 SV=1 - [B4F9R4_MAIZE]	55	1	12	70	260	28.0848	11.0776	0.957912	1.07369	1.1663	1.06597	1.02752	1.03526	0.851667	0.971483	1.09726	0.328697
B4FPE4	V-type proton ATPase subunit G		V-type proton ATPase subunit G OS=Zea mays OX=4577 PE=2 SV=1 - [B4FPE4_MAIZE]	54.55	2	5	24	110	12.2273	6.12549	1.13953	1.05732	1.40661	1.20115	0.970161	1.02663	0.825355	0.940715	1.27685	0.0982617
B6T7L9	14-3-3-like protein		14-3-3-like protein OS=Zea mays OX=4577 PE=2 SV=1 - [B6T7L9_MAIZE]	54.48	3	14	72	268	29.4785	4.81787	1.11256	0.924777	1.02738	1.02157	0.926777	1.04789	0.920772	0.965146	1.05846	0.454998
B7ZYI0	14-3-3-like protein GF14-6	ZEAMMB73_Zm00001d003401	14-3-3-like protein GF14-6 OS=Zea mays OX=4577 GN=ZEAMMB73_Zm00001d003401 PE=2 SV=1 - [B7ZYI0_MAIZE]	54.41	1	15	85	261	29.6439	4.80518		1.04504	1.0917	1.06837		1.08152	1.01602	1.04877	1.01869	0.67415
B6U9S6	APx1-Cytosolic Ascorbate Peroxidase	POD1	APx1-Cytosolic Ascorbate Peroxidase OS=Zea mays OX=4577 GN=POD1 PE=2 SV=1 - [B6U9S6_MAIZE]	53.6	3	12	83	250	27.3539	5.98584	1.02933	0.967031	1.06946	1.02194	1.04132	1.04818	0.980833	1.02344	0.998531	0.969275
B6TM55	APx1-Cytosolic Ascorbate Peroxidase	103639279	APx1-Cytosolic Ascorbate Peroxidase OS=Zea mays OX=4577 GN=103639279 PE=2 SV=1 - [B6TM55_MAIZE]	53.6	1	12	86	250	27.2908	5.8335	1.03126	0.865515	1.01389	0.970223	1.01536	1.09932	0.903373	1.00602	0.964419	0.667701
B6SGY0	Subtilisin-chymotrypsin inhibitor CI-1B	100282452	Subtilisin-chymotrypsin inhibitor CI-1B OS=Zea mays OX=4577 GN=100282452 PE=2 SV=1 - [B6SGY0_MAIZE]	53.52	3	3	23	71	7.55689	5.05908	0.80963	0.804167	0.99958	0.871126	1.10818	1.45083	0.997571	1.18553	0.734801	0.105453
B4FI76	Adenylate kinase 4	100194305	Adenylate kinase 4 OS=Zea mays OX=4577 GN=100194305 PE=2 SV=1 - [B4FI76_MAIZE]	53.11	3	13	45	241	26.4418	7.41553	1.01666	0.918841	0.946516	0.960673	1.01175	1.15448	1.07599	1.08074	0.888902	0.0762134
B6SK03	Ubiquitin-conjugating enzyme E2 variant 1C	100279740	Ubiquitin-conjugating enzyme E2 variant 1C OS=Zea mays OX=4577 GN=100279740 PE=2 SV=1 - [B6SK03_MAIZE]	52.7	3	7	41	148	16.7603	6.93213	0.987088	0.973344	0.998359	0.986264	1.01831	1.09539	1.04272	1.05214	0.937387	0.0508449
C4JBR4	Uncharacterized protein		Uncharacterized protein OS=Zea mays OX=4577 PE=2 SV=1 - [C4JBR4_MAIZE]	52.5	3	9	57	240	22.5927	6.37939	0.933658	1.09684	1.00551	1.012	1.02582	1.02507	1.01348	1.02145	0.990744	0.851588
B4FH44	Thioredoxin	ZEAMMB73_Zm00001d019034	Thioredoxin OS=Zea mays OX=4577 GN=ZEAMMB73_Zm00001d019034 PE=2 SV=1 - [B4FH44_MAIZE]	52.46	6	6	13	122	13.0737	6.66846	1.32619	1.01159	1.09423	1.144	0.843445	1.03614	0.925678	0.935086	1.22342	0.128975
B4FRG1	14-3-3-like protein	542285	14-3-3-like protein OS=Zea mays OX=4577 GN=542285 PE=2 SV=1 - [B4FRG1_MAIZE]	52.26	2	13	63	266	29.2965	4.86865		0.906965	1.04268	0.974821		1.07106	0.988659	1.02986	0.946556	0.5598
B4FNQ8	Calmodulin	100272455	Calmodulin OS=Zea mays OX=4577 GN=100272455 PE=2 SV=1 - [B4FNQ8_MAIZE]	52.03	3	7	24	148	16.6285	5.14795	1.4789	1.14186	1.05894	1.22656	0.826083	0.857975	0.984598	0.889552	1.37886	0.0700156
C0PM74	Adenylate kinase 4	100384174	Adenylate kinase 4 OS=Zea mays OX=4577 GN=100384174 PE=2 SV=1 - [C0PM74_MAIZE]	51.87	3	13	53	241	26.3818	7.81104	1.08607	0.931141	1.04246	1.01989	0.970086	0.996147	0.962692	0.976308	1.04464	0.408328
B4FG39	Peroxidase	100193733	Peroxidase OS=Zea mays OX=4577 GN=100193733 PE=2 SV=1 - [B4FG39_MAIZE]	51.74	13	13	78	344	36.5808	7.85498	1.07153	0.931947	0.887786	0.963756	0.941403	0.982757	1.09951	1.00789	0.956211	0.577342
B4FEJ6	Actin depolymerizing factor3	ADF3_1	Actin depolymerizing factor3 OS=Zea mays OX=4577 GN=ADF3_1 PE=2 SV=1 - [B4FEJ6_MAIZE]	51.08	1	6	27	139	15.8899	5.66846	1.09836	0.929526	0.924413	0.984101	0.964466	0.999771	1.21734	1.06052	0.927938	0.477197
B4FSW2	Actin-depolymerizing factor 10	100280568	Actin-depolymerizing factor 10 OS=Zea mays OX=4577 GN=100280568 PE=2 SV=1 - [B4FSW2_MAIZE]	51.08	1	6	28	139	15.9039	5.66846	1.01482	1.03995	1.00144	1.01874	1.11041	1.01505	1.17436	1.09994	0.926175	0.163505
A0A1D6PD18	Ascorbate peroxidase-like protein	103644971	Ascorbate peroxidase-like protein OS=Zea mays OX=4577 GN=103644971 PE=3 SV=1 - [A0A1D6PD18_MAIZE]	50.98	2	6	33	102	11.2896	4.94482	1.15701	1.06354	1.05683	1.09246	1.00539	0.930669	1.05908	0.99838	1.09423	0.129073
B6SKN3	1,2-dihydroxy-3-keto-5-methylthiopentene dioxygenase	100216585	1,2-dihydroxy-3-keto-5-methylthiopentene dioxygenase OS=Zea mays OX=4577 GN=100216585 PE=2 SV=1 - [B6SKN3_MAIZE]	50	9	9	35	198	23.4515	5.19873	1.17082	1.00257	0.946532	1.03997	0.930602	0.992544	1.04551	0.989551	1.05095	0.538899
C0PHC0	Vacuolar proton pump3	542327	Vacuolar proton pump3 OS=Zea mays OX=4577 GN=542327 PE=2 SV=1 - [C0PHC0_MAIZE]	49.76	21	25	134	621	68.4038	5.51611	1.00901	0.994213	1.01201	1.00507	0.979456	1.01471	1.01343	1.00253	1.00253	0.852182
B4FD90	40S ribosomal protein S19	RPS19A_1	40S ribosomal protein S19 OS=Zea mays OX=4577 GN=RPS19A_1 PE=2 SV=1 - [B4FD90_MAIZE]	49.66	2	8	52	145	16.2556	9.99365	0.880376	1.08241		0.981395	1.02386	1.09531		1.05959	0.926203	0.541433
B4FRH8	Actin-7	100283878	Actin-7 OS=Zea mays OX=4577 GN=100283878 PE=2 SV=1 - [B4FRH8_MAIZE]	49.34	1	14	124	377	41.653	5.49072	1.05624	1.04274	0.975732	1.02491	0.938857	1.01165	1.03699	0.995832	1.0292	0.492526
B6TUR3	Uncharacterized protein		Uncharacterized protein OS=Zea mays OX=4577 PE=2 SV=1 - [B6TUR3_MAIZE]	48.75	3	3	5	80	8.58633	5.05908	1.08182	0.837369	1.20739	1.04219	1.18999	1.07225	0.91714	1.05979	0.983392	0.902082
C4JBS8	Glyceraldehyde-3-phosphate dehydrogenase	ZEAMMB73_Zm00001d049641	Glyceraldehyde-3-phosphate dehydrogenase OS=Zea mays OX=4577 GN=ZEAMMB73_Zm00001d049641 PE=2 SV=1 - [C4JBS8_MAIZE]	48.66	5	17	112	337	36.4717	6.96143	1.09534	1.09142	1.21202	1.13292	0.999705	1.217	0.993636	1.07011	1.05869	0.493474
B4FAG0	dTDP-glucose dehydratase homolog csu219	100191862	dTDP-glucose dehydratase homolog csu219 OS=Zea mays OX=4577 GN=100191862 PE=2 SV=1 - [B4FAG0_MAIZE]	48.57	4	13	78	350	39.2853	7.60596	1.22004	0.907802	0.948729	1.02552	0.933413	1.1243	1.13812	1.06528	0.962679	0.753427
B6THU9	Peroxidase	100283382	Peroxidase OS=Zea mays OX=4577 GN=100283382 PE=2 SV=1 - [B6THU9_MAIZE]	48.17	15	15	92	328	35.3582	7.66455	0.995002	0.975821	0.921824	0.964216	0.973773	1.01754	1.06987	1.02039	0.944944	0.187483
B6TMC2	Uncharacterized protein		Uncharacterized protein OS=Zea mays OX=4577 PE=2 SV=1 - [B6TMC2_MAIZE]	47.5	1	1	3	40	4.49636	8.25049	1.01169		0.961458	0.986576	0.970428		0.772076	0.871252	1.13237	0.376702
B6TB39	Fructokinase-2		Fructokinase-2 OS=Zea mays OX=4577 PE=2 SV=1 - [B6TB39_MAIZE]	47.46	12	12	58	335	35.4649	5.57959	1.01102	1.11869	1.03586	1.05519	1.03017	0.92494	0.987157	0.980754	1.0759	0.170716
B4F9R6	60S ribosomal protein L18a		60S ribosomal protein L18a OS=Zea mays OX=4577 PE=2 SV=1 - [B4F9R6_MAIZE]	47.19	2	8	37	178	21.3513	10.4624		1.05197	1.03466	1.04332		1.03051	1.02117	1.02584	1.01703	0.217647
B4F8W6	UTP--glucose-1-phosphate uridylyltransferase		UTP--glucose-1-phosphate uridylyltransferase OS=Zea mays OX=4577 PE=2 SV=1 - [B4F8W6_MAIZE]	47.15	2	18	103	473	52.0564	5.42725	1.36084	0.96951	1.08942	1.13992	0.901661	1.07616	0.923992	0.967271	1.17849	0.248944
C0P4S1	Peroxidase	ZEAMMB73_Zm00001d040581	Peroxidase OS=Zea mays OX=4577 GN=ZEAMMB73_Zm00001d040581 PE=2 SV=1 - [C0P4S1_MAIZE]	47.13	6	13	43	348	38.0603	6.65381	1.10711	1.05863	1.00925	1.05833	0.956844	0.983467	0.988538	0.976283	1.08404	0.0517352
B6SHM7	40S ribosomal protein S7	RPS7_2	40S ribosomal protein S7 OS=Zea mays OX=4577 GN=RPS7_2 PE=2 SV=1 - [B6SHM7_MAIZE]	46.88	5	8	40	192	22.198	9.74463	0.937669	1.04754	1.0006	0.995271	1.04028	0.993405	1.05003	1.02791	0.968251	0.419609
B4FS99	ATP synthase subunit d, mitochondrial	ZEAMMB73_Zm00001d031825	ATP synthase subunit d, mitochondrial OS=Zea mays OX=4577 GN=ZEAMMB73_Zm00001d031825 PE=2 SV=1 - [B4FS99_MAIZE]	46.47	8	8	54	170	19.915	5.2876	0.974031	0.869764	0.938932	0.927575	0.987395	1.07588	1.01824	1.02717	0.903038	0.0680866
B4FMV3	V-type proton ATPase subunit G	100282544	V-type proton ATPase subunit G OS=Zea mays OX=4577 GN=100282544 PE=2 SV=1 - [B4FMV3_MAIZE]	46.36	1	4	21	110	12.2403	6.12549	1.19285	1.09679	1.49007	1.25991	0.904263	1.10539	0.487955	0.832535	1.51334	0.120184
A0A1D6MSC0	Peroxidase	ZEAMMB73_Zm00001d040702	Peroxidase OS=Zea mays OX=4577 GN=ZEAMMB73_Zm00001d040702 PE=3 SV=1 - [A0A1D6MSC0_MAIZE]	46.32	10	14	68	367	38.3322	7.13721	1.05399	0.941772	0.960395	0.985385	0.984455	1.0915	1.07238	1.04945	0.938958	0.251861
A0A1D6Q1G3	Uncharacterized protein	100275334	Uncharacterized protein OS=Zea mays OX=4577 GN=100275334 PE=4 SV=1 - [A0A1D6Q1G3_MAIZE]	46.24	3	3	9	93	10.1261	9.62744	1.11527	0.949814	0.957675	1.00759	0.862634	1.20018	1.00354	1.02212	0.985782	0.902798
C0HHU2	23-bisphosphoglycerate-independent phosphoglycerate mutase 1	100381658	23-bisphosphoglycerate-independent phosphoglycerate mutase 1 OS=Zea mays OX=4577 GN=100381658 PE=2 SV=1 - [C0HHU2_MAIZE]	46.04	7	23	132	556	60.2518	5.77002	0.997053	1.02489	1.0193	1.01375	0.995405	1.00613	1.04617	1.0159	0.997879	0.908631
C0PPD4	Uncharacterized protein		Uncharacterized protein OS=Zea mays OX=4577 PE=2 SV=1 - [C0PPD4_MAIZE]	45.95	1	8	22	185	20.0288	10.0376	0.838594	0.859843	1.01015	0.902863	1.16548	1.06322	0.826425	1.01837	0.886574	0.368282
B6TJ90	Multifunctional fusion protein		Multifunctional fusion protein OS=Zea mays OX=4577 PE=2 SV=1 - [B6TJ90_MAIZE]	45.9	5	7	168	183	20.0626	9.67139	1.08354	1.00984	1.00106	1.03148	0.965733	1.10775	0.988291	1.02059	1.01067	0.842103
B6T7B2	40S ribosomal protein S9-2	100282862	40S ribosomal protein S9-2 OS=Zea mays OX=4577 GN=100282862 PE=2 SV=1 - [B6T7B2_MAIZE]	45.88	4	11	41	194	22.418	10.3159	1.44741	1.07564	1.16847	1.23051	0.903303	1.02988	0.760937	0.898042	1.37021	0.0709522
C0PFK3	Proteasome subunit alpha type	PAA1_2	Proteasome subunit alpha type OS=Zea mays OX=4577 GN=PAA1_2 PE=2 SV=1 - [C0PFK3_MAIZE]	45.53	12	12	45	246	27.4001	6.55127	0.983079	1.00034	0.989547	0.990989	1.01289	1.00873	0.966519	0.996046	0.994923	0.76271
O04710	Peroxidase	ap1	Peroxidase OS=Zea mays OX=4577 GN=ap1 PE=2 SV=1 - [O04710_MAIZE]	45.22	7	12	101	356	37.751	5.70654	1.08835	0.89793	0.927939	0.971407	0.926592	1.03297	1.05316	1.00424	0.967306	0.667636
B4FKM1	Guanine nucleotide-binding protein beta subunit-like protein	100216946	Guanine nucleotide-binding protein beta subunit-like protein OS=Zea mays OX=4577 GN=100216946 PE=2 SV=1 - [B4FKM1_MAIZE]	45.21	11	11	68	334	36.214	6.60986	0.960215	1.10738	1.05481	1.0408	1.01688	0.922517	0.953409	0.964267	1.07937	0.209547
A0A1D6L3U6	Aluminum induced protein with YGL and LRDR motifs	103643996	Aluminum induced protein with YGL and LRDR motifs OS=Zea mays OX=4577 GN=103643996 PE=4 SV=1 - [A0A1D6L3U6_MAIZE]	45.1	9	9	36	255	26.8824	6.52197	1.04714	1.01577	1.00014	1.02102	0.968332	0.936766	0.997922	0.967673	1.05512	0.0760689
B8A046	Phenylalanine ammonia-lyase	542258	Phenylalanine ammonia-lyase OS=Zea mays OX=4577 GN=542258 PE=2 SV=1 - [B8A046_MAIZE]	45.09	7	29	197	703	75.4171	6.3667	1.05916	1.12353	1.02096	1.06788	1.03053	0.931061	0.981359	0.980984	1.08858	0.104229
B6T681	S-adenosylmethionine synthase		S-adenosylmethionine synthase OS=Zea mays OX=4577 PE=2 SV=1 - [B6T681_MAIZE]	44.39	2	13	81	392	42.5294	5.8208	1.4469	1.09076	1.08204	1.20657	0.782863	1.00192	0.899481	0.894754	1.34849	0.0833442
B6TQ08	Actin-1	103625937	Actin-1 OS=Zea mays OX=4577 GN=103625937 PE=2 SV=1 - [B6TQ08_MAIZE]	44.3	1	13	121	377	41.7699	5.49072	0.905228	1.09126	1.05056	1.01568	1.08554	0.975128	1.07969	1.04679	0.970285	0.666122
B4FCE3	Sm-like protein LSM6A	100192719	Sm-like protein LSM6A OS=Zea mays OX=4577 GN=100192719 PE=2 SV=1 - [B4FCE3_MAIZE]	44.21	4	4	6	95	10.0701	9.0708	0.874178	1.0144	0.95539	0.947988	1.01462	1.02463	1.0443	1.02785	0.922301	0.127108
B4FZZ2	Peptidyl-prolyl cis-trans isomerase	103627222	Peptidyl-prolyl cis-trans isomerase OS=Zea mays OX=4577 GN=103627222 PE=2 SV=1 - [B4FZZ2_MAIZE]	44.19	5	7	43	172	18.3501	8.68994	1.17164	1.0015	0.991189	1.05478	0.91189	1.03326	0.906592	0.950581	1.10961	0.21959
A0A1D6IKH3	Ribonuclease 1	ZEAMMB73_Zm00001d022228	Ribonuclease 1 OS=Zea mays OX=4577 GN=ZEAMMB73_Zm00001d022228 PE=3 SV=1 - [A0A1D6IKH3_MAIZE]	44.02	7	7	18	259	28.4829	7.06396	1.05154	1.02931	0.947499	1.00945	0.989718	0.940102	1.07821	1.00268	1.00676	0.90132
B6T281	40S ribosomal protein S14		40S ribosomal protein S14 OS=Zea mays OX=4577 PE=2 SV=1 - [B6T281_MAIZE]	44	3	6	56	150	16.3756	10.5503	1.02179	1.05646	0.887146	0.988466	0.99053	1.0325	1.04776	1.0236	0.965679	0.553595
B6SP36	NADH dehydrogenase [ubiquinone] 1 alpha subcomplex subunit 1	100501943	NADH dehydrogenase [ubiquinone] 1 alpha subcomplex subunit 1 OS=Zea mays OX=4577 GN=100501943 PE=2 SV=1 - [B6SP36_MAIZE]	43.75	3	3	11	64	7.20866	8.92432	1.12543	1.01055	1.01847	1.05148	0.995028	0.991575	1.00186	0.996154	1.05554	0.210788
B4FKA4	Uncharacterized protein	100216896	Uncharacterized protein OS=Zea mays OX=4577 GN=100216896 PE=2 SV=1 - [B4FKA4_MAIZE]	43.71	2	5	26	151	16.3537	10.5649	0.95943	1.00001		0.979718	0.776163	1.12084		0.948504	1.03291	0.873823
B6T6G1	60S ribosomal protein L12	100282351	60S ribosomal protein L12 OS=Zea mays OX=4577 GN=100282351 PE=2 SV=1 - [B6T6G1_MAIZE]	43.37	1	6	12	166	17.6906	8.96826		0.873783	0.91692	0.895351		1.03908	1.11824	1.07866	0.830061	0.0554848
B6TM00	60 ribosomal protein L14		60 ribosomal protein L14 OS=Zea mays OX=4577 PE=2 SV=1 - [B6TM00_MAIZE]	43.33	1	7	64	150	16.9115	10.4185	0.975758	1.02645	1.1074	1.03654	1.02437	1.0833	0.865517	0.991062	1.04588	0.579411
A0A1D6L2U8	Tubulin alpha chain	100037751	Tubulin alpha chain OS=Zea mays OX=4577 GN=100037751 PE=3 SV=1 - [A0A1D6L2U8_MAIZE]	43.27	2	14	107	416	45.8756	5.03369	0.804225	1.09503	1.16241	1.02055	1.04827	0.855023	0.848351	0.917213	1.11267	0.464628
B6TFS9	14-3-3-like protein A	100283215	14-3-3-like protein A OS=Zea mays OX=4577 GN=100283215 PE=2 SV=1 - [B6TFS9_MAIZE]	43.24	5	11	48	259	28.6043	4.94482	0.535029	0.80984	1.00803	0.784299	1.13643	1.15521	0.95936	1.08366	0.723747	0.117856
A0A1D6FAX1	Germin-like protein subfamily 2 member 1	ZEAMMB73_Zm00001d008210	Germin-like protein subfamily 2 member 1 OS=Zea mays OX=4577 GN=ZEAMMB73_Zm00001d008210 PE=3 SV=1 - [A0A1D6FAX1_MAIZE]	43.24	3	6	35	185	19.358	9.24658	1.55878	1.02147	1.0674	1.21588	0.723115	1.05144	0.969713	0.914756	1.32919	0.203432
B4FB66	40S ribosomal protein S5-2	100193240	40S ribosomal protein S5-2 OS=Zea mays OX=4577 GN=100193240 PE=2 SV=1 - [B4FB66_MAIZE]	43.22	2	8	45	199	22.1827	9.80322	1.07591	1.10504	1.10002	1.09366	1.0642	1.04262	1.11963	1.07548	1.0169	0.501664
Q43863	Annexin		Annexin OS=Zea mays OX=4577 PE=2 SV=2 - [Q43863_MAIZE]	42.99	10	12	58	314	35.5385	7.54736	1.00511	0.880217	1.00899	0.964775	0.875188	1.00952	0.978822	0.954509	1.01076	0.869555
B6SHX4	NADH ubiquinone oxidoreductase B22-like subunit	100282004	NADH ubiquinone oxidoreductase B22-like subunit OS=Zea mays OX=4577 GN=100282004 PE=2 SV=1 - [B6SHX4_MAIZE]	42.98	5	5	18	114	13.3458	8.42627	1.00103	0.859993	0.903343	0.921455	0.987746	1.20041	1.11059	1.09958	0.838004	0.0748855
A0A1D6EB22	Abscisic acid stress ripening3	ZEAMMB73_Zm00001d003712	Abscisic acid stress ripening3 OS=Zea mays OX=4577 GN=ZEAMMB73_Zm00001d003712 PE=4 SV=1 - [A0A1D6EB22_MAIZE]	42.38	10	10	32	269	27.7602	5.24951	1.25548	1.27823	0.921517	1.15174	0.893354	0.938165	1.13147	0.987662	1.16613	0.295627
F8UV61	Cell division cycle protein 48 (Fragment)		Cell division cycle protein 48 (Fragment) OS=Zea mays OX=4577 PE=2 SV=1 - [F8UV61_MAIZE]	42.32	2	24	102	768	85.758	5.32568	1.04192	0.977225	1.01995	1.01303	0.961188	0.985969	0.962607	0.969921	1.04445	0.104784
B6SHZ1	40S ribosomal protein S5	ZEAMMB73_Zm00001d008387	40S ribosomal protein S5 OS=Zea mays OX=4577 GN=ZEAMMB73_Zm00001d008387 PE=2 SV=1 - [B6SHZ1_MAIZE]	42.21	3	9	52	199	22.3528	9.77393	0.782991	1.00143	0.914677	0.899698	1.12298	1.02926	1.00557	1.0526	0.854736	0.104017
A0A0B4J303	Eukaryotic initiation factor4a	ZEAMMB73_Zm00001d036480	Eukaryotic initiation factor4a OS=Zea mays OX=4577 GN=ZEAMMB73_Zm00001d036480 PE=3 SV=1 - [A0A0B4J303_MAIZE]	42.03	13	14	104	414	46.9529	5.47803	0.901401	0.970516	1.07486	0.982259	1.07295	0.981734	0.961244	1.00531	0.977073	0.724718
A0A1D6JZU3	Pathogenesis-related protein 10	103634525	Pathogenesis-related protein 10 OS=Zea mays OX=4577 GN=103634525 PE=3 SV=1 - [A0A1D6JZU3_MAIZE]	41.88	4	4	10	160	16.8895	5.51611	1.15727	0.967838	1.49405	1.20639	0.945074	1.03317	0.769245	0.91583	1.31726	0.167059
Q2XX23	Non-specific lipid-transfer protein (Fragment)	plt1	Non-specific lipid-transfer protein (Fragment) OS=Zea mays subsp. parviglumis OX=76912 GN=plt1 PE=3 SV=1 - [Q2XX23_ZEAMP]	41.82	2	4	11	110	10.5722	8.51416	1.97243	1.44382	0.657159	1.3578	0.494017	0.754009	0.923917	0.723981	1.87547	0.190039
B6T3P9	Enolase		Enolase OS=Zea mays OX=4577 PE=2 SV=1 - [B6T3P9_MAIZE]	41.48	10	13	54	446	48.1005	5.8208	0.963688	1.08056	1.13088	1.05838	1.01153	0.958287	0.920212	0.963342	1.09865	0.165859
Q9FQC5	Glutathione S-transferase GST 14	541832	Glutathione S-transferase GST 14 OS=Zea mays OX=4577 GN=541832 PE=2 SV=1 - [Q9FQC5_MAIZE]	41.46	6	8	36	246	27.8274	8.57275	0.936926	0.976949	1.0218	0.978558	0.949629	1.04973	1.01376	1.00437	0.974298	0.536069
A0A1D6F3W8	V-type proton ATPase subunit F	100283470	V-type proton ATPase subunit F OS=Zea mays OX=4577 GN=100283470 PE=4 SV=1 - [A0A1D6F3W8_MAIZE]	41.18	4	4	19	102	11.5651	7.40088	0.967505	1.00476	0.998278	0.99018	1.02896	1.02851	0.994968	1.01748	0.973167	0.164894
B6TGG2	2,3-bisphosphoglycerate-independent phosphoglycerate mutase		2,3-bisphosphoglycerate-independent phosphoglycerate mutase OS=Zea mays OX=4577 PE=2 SV=1 - [B6TGG2_MAIZE]	40.97	6	22	125	559	60.6399	5.52881	1.23408	1.03174	1.02574	1.09719	0.888698	1.00169	0.967464	0.952617	1.15176	0.130666
P41040	Calmodulin	CALM1	Calmodulin OS=Zea mays OX=4577 GN=CALM1 PE=2 SV=2 - [CALM_MAIZE]	40.94	1	5	24	149	16.8009	4.27197	1.19134	0.969407	0.840844	1.00053	0.934743	1.13179	0.727687	0.931405	1.07422	0.679096
Q4FZ53	Cysteine proteinase inhibitor	cc3	Cysteine proteinase inhibitor OS=Zea mays OX=4577 GN=cc3 PE=2 SV=1 - [Q4FZ53_MAIZE]	40.91	4	4	15	110	12.3043	5.77002	1.05755	0.921681	1.08476	1.02133	0.860574	1.33638	0.951466	1.04947	0.973184	0.864155
K7TVZ1	6-phosphogluconate dehydrogenase, decarboxylating	100856973	6-phosphogluconate dehydrogenase, decarboxylating OS=Zea mays OX=4577 GN=100856973 PE=3 SV=1 - [K7TVZ1_MAIZE]	40.83	14	16	84	507	54.1338	6.72705	0.998142	0.955631	0.908414	0.954062	0.982222	1.04405	1.06145	1.02924	0.926957	0.100564
C0PHR4	Adenosylhomocysteinase	100282150	Adenosylhomocysteinase OS=Zea mays OX=4577 GN=100282150 PE=2 SV=1 - [C0PHR4_MAIZE]	40.82	17	17	152	485	53.2	5.89697	0.948342	1.01277	0.981157	0.980757	0.997625	0.959146	1.00689	0.987887	0.992782	0.778128
Q0GR44	ATP synthase subunit alpha	atp1	ATP synthase subunit alpha OS=Zea mays subsp. parviglumis OX=76912 GN=atp1 PE=3 SV=1 - [Q0GR44_ZEAMP]	40.35	17	19	145	508	55.1457	6.1001	1.02071	0.983021	1.01393	1.00589	1.00272	1.0357	0.986769	1.0084	0.99751	0.898569
B4FW18	40S ribosomal protein S28	100280891	40S ribosomal protein S28 OS=Zea mays OX=4577 GN=100280891 PE=2 SV=1 - [B4FW18_MAIZE]	40	3	3	22	65	7.45912	11.1655	0.962758	1.05079	1.18513	1.06623	0.985395	1.25651	0.921035	1.05431	1.0113	0.926576
B6SHT6	PVR3-like protein	100280885	PVR3-like protein OS=Zea mays OX=4577 GN=100280885 PE=2 SV=1 - [B6SHT6_MAIZE]	40	3	3	6	100	10.2829	8.49951	1.58609	1.20156	1.31149	1.36638	0.689156	0.998229		0.843693	1.61952	0.0683342
A0A1D6H5Z9	Phosphoenolpyruvate carboxylase2	542479	Phosphoenolpyruvate carboxylase2 OS=Zea mays OX=4577 GN=542479 PE=4 SV=1 - [A0A1D6H5Z9_MAIZE]	39.77	1	14	91	435	49.1923	7.18115	1.10386	0.939074	0.930726	0.99122	0.953539	1.04408	1.04696	1.01486	0.976706	0.73127
C0PCV2	40S ribosomal protein S8		40S ribosomal protein S8 OS=Zea mays OX=4577 PE=2 SV=1 - [C0PCV2_MAIZE]	39.72	2	7	56	214	24.2951	10.3745	1.01763	1.04039	1.08933	1.04912	1.05718	1.03245	0.969572	1.01974	1.02881	0.430977
B4FF24	UDP-glucuronic acid decarboxylase 5	100193447	UDP-glucuronic acid decarboxylase 5 OS=Zea mays OX=4577 GN=100193447 PE=2 SV=1 - [B4FF24_MAIZE]	39.71	2	11	75	350	39.3013	7.94287	0.664558	0.938729	0.886923	0.83007	1.13641	1.07052	0.899557	1.0355	0.801615	0.134662
C0HHA6	Peroxidase	100276245	Peroxidase OS=Zea mays OX=4577 GN=100276245 PE=2 SV=1 - [C0HHA6_MAIZE]	39.66	4	11	26	348	38.3105	6.78564	1.06866	0.927072	1.13169	1.04247	0.999328	1.08244	1.24716	1.10964	0.939468	0.517208
D7NLB3	Peroxidase	107548102	Peroxidase OS=Zea mays OX=4577 GN=107548102 PE=3 SV=1 - [D7NLB3_MAIZE]	39.63	6	10	72	323	35.0315	6.63916	1.00712	1.04238	0.950075	0.999859	1.02738	1.06597	1.00516	1.03284	0.96807	0.364052
B6SHW9	Ubiquitin fusion protein	103647262	Ubiquitin fusion protein OS=Zea mays OX=4577 GN=103647262 PE=2 SV=1 - [B6SHW9_MAIZE]	39.53	1	5	188	129	14.749	9.92041	0.724502		0.842418	0.78346	1.14124		1.03373	1.08749	0.720433	0.0624844
B6SI39	60S ribosomal protein L9-1	ZEAMMB73_Zm00001d035901	60S ribosomal protein L9-1 OS=Zea mays OX=4577 GN=ZEAMMB73_Zm00001d035901 PE=2 SV=1 - [B6SI39_MAIZE]	39.47	1	8	38	190	21.4476	9.70068	0.852322	0.75913	0.904869	0.838773	1.03394	1.30017	0.962798	1.09897	0.763237	0.0793271
Q6VWE9	O-methyltransferase (Fragment)	comt	O-methyltransferase (Fragment) OS=Zea mays OX=4577 GN=comt PE=3 SV=1 - [Q6VWE9_MAIZE]	39.39	13	13	126	358	38.8263	5.77002	0.94775	0.946382	1.0216	0.971909	1.02499	0.995161	0.959449	0.9932	0.978564	0.533028
A0A1D6PHI2	Peptidase beta subunit	ZEAMMB73_Zm00001d048102	Peptidase beta subunit OS=Zea mays OX=4577 GN=ZEAMMB73_Zm00001d048102 PE=3 SV=1 - [A0A1D6PHI2_MAIZE]	39.38	7	15	72	480	53.3919	5.73193	1.02534	0.966967	1.02434	1.00555	0.976795	0.99776	0.973581	0.982712	1.02324	0.332453
A0A1D6JSS7	Putative mitochondrial-processing peptidase subunit beta mitochondrial	100191520	Putative mitochondrial-processing peptidase subunit beta mitochondrial OS=Zea mays OX=4577 GN=100191520 PE=3 SV=1 - [A0A1D6JSS7_MAIZE]	39.36	7	15	47	498	55.3541	6.04932	1.06447	0.971705	0.968293	1.00149	0.993259	1.02836	1.02509	1.01557	0.986137	0.695348
A0A1D6Q3U6	Small nuclear ribonucleoprotein family protein	100286216	Small nuclear ribonucleoprotein family protein OS=Zea mays OX=4577 GN=100286216 PE=4 SV=1 - [A0A1D6Q3U6_MAIZE]	39.24	2	2	5	79	8.82198	11.6196	0.856304	1.01657	0.987889	0.953588	1.04007	0.933349	0.9351	0.969506	0.983582	0.80597
A0A1D6KUI9	Cell division control protein 48 homolog D	100274218	Cell division control protein 48 homolog D OS=Zea mays OX=4577 GN=100274218 PE=3 SV=1 - [A0A1D6KUI9_MAIZE]	39.01	1	23	96	810	89.9198	5.17334	1.11632	0.994979	1.11699	1.0761	0.98897	1.02156	0.915285	0.97527	1.10338	0.120874
B6SZD1	Mitochondrial import receptor subunit TOM20-4	100281827	Mitochondrial import receptor subunit TOM20-4 OS=Zea mays OX=4577 GN=100281827 PE=2 SV=1 - [B6SZD1_MAIZE]	38.92	6	6	17	203	22.4019	4.95752	1.03208	1.01147	0.987131	1.01023	0.983332	1.02413	0.940453	0.982639	1.02808	0.371427
B4FSS8	Annexin D4	ZEAMMB73_Zm00001d038065	Annexin D4 OS=Zea mays OX=4577 GN=ZEAMMB73_Zm00001d038065 PE=2 SV=1 - [B4FSS8_MAIZE]	38.89	13	13	38	324	36.2904	7.12256	0.979936	0.925184	0.989957	0.965026	0.983462	0.971675	0.994117	0.983085	0.98163	0.441244
A0A1D6PSX8	O-methyltransferase ZRP4	ZEAMMB73_Zm00001d049179	O-methyltransferase ZRP4 OS=Zea mays OX=4577 GN=ZEAMMB73_Zm00001d049179 PE=3 SV=1 - [A0A1D6PSX8_MAIZE]	38.87	10	10	43	391	42.4991	5.73193	1.02889	0.994477	1.01211	1.01183	1.02157	0.960982	1.02588	1.00281	1.00899	0.717281
A0A1D6FEA7	Triose phosphate isomerase3	ZEAMMB73_Zm00001d008619	Triose phosphate isomerase3 OS=Zea mays OX=4577 GN=ZEAMMB73_Zm00001d008619 PE=4 SV=1 - [A0A1D6FEA7_MAIZE]	38.69	2	5	27	168	17.7623	4.90674	1.05206	1.01098	0.956412	1.00649	1.03832	0.993291	1.02355	1.01839	0.988316	0.718151
B4FUE0	Obg-like ATPase 1	100283841	Obg-like ATPase 1 OS=Zea mays OX=4577 GN=100283841 PE=2 SV=1 - [B4FUE0_MAIZE]	38.68	12	12	37	393	44.2149	6.75635	0.972891	1.07671	0.986138	1.01191	1.02321	0.971004	1.02697	1.00706	1.00482	0.902818
B4G1D2	CBS domain protein	CBSX3_0	CBS domain protein OS=Zea mays OX=4577 GN=CBSX3_0 PE=2 SV=1 - [B4G1D2_MAIZE]	38.54	7	7	26	205	22.4837	9.33447	1.43572	1.05818	1.0631	1.18567	0.837137	1.05964	1.02535	0.974043	1.21726	0.212719
B4FNK1	Uncharacterized protein		Uncharacterized protein OS=Zea mays OX=4577 PE=2 SV=1 - [B4FNK1_MAIZE]	38.48	1	13	60	395	40.4895	5.70654	1.26909	0.956354	1.02087	1.08211	0.832303	1.00081	1.00809	0.947067	1.14259	0.291718
C4JA45	60S ribosomal protein L5-1 homolog b	ZEAMMB73_Zm00001d012161	60S ribosomal protein L5-1 homolog b OS=Zea mays OX=4577 GN=ZEAMMB73_Zm00001d012161 PE=2 SV=1 - [C4JA45_MAIZE]	38.41	4	8	34	302	34.3568	9.33447	0.926103	1.03961	1.08225	1.01599	1.01161	1.0748	0.839177	0.975195	1.04183	0.654267
Q71RX2	Isopentenyl pyrophosphate isomerase1	541901	Isopentenyl pyrophosphate isomerase1 OS=Zea mays OX=4577 GN=541901 PE=2 SV=1 - [Q71RX2_MAIZE]	38.4	7	7	27	237	27.2106	4.97021	1.15875	1.12299	1.03397	1.10523	0.986668	1.08485	1.01839	1.02997	1.07308	0.184875
B4G0R0	60S ribosomal protein L33-B	ZEAMMB73_Zm00001d052075	60S ribosomal protein L33-B OS=Zea mays OX=4577 GN=ZEAMMB73_Zm00001d052075 PE=2 SV=1 - [B4G0R0_MAIZE]	38.39	2	4	27	112	12.7887	10.521	0.900015	1	1.01308	0.971031	1.02108	1.07617	0.992532	1.02993	0.942816	0.24566
B4FTW5	60S ribosomal protein L7-1	100282330	60S ribosomal protein L7-1 OS=Zea mays OX=4577 GN=100282330 PE=2 SV=1 - [B4FTW5_MAIZE]	38.37	2	11	62	245	28.3165	10.1255	0.889516	1.11992	1.07577	1.0284	1.11025	1.04689	0.888466	1.0152	1.013	0.897909
B6T7X9	Profilin		Profilin OS=Zea mays OX=4577 PE=2 SV=1 - [B6T7X9_MAIZE]	38.17	2	4	43	131	14.064	4.70361	0.997178	1.06644	1.0972	1.0536	1.01498	1.03602	0.659681	0.903561	1.16606	0.298309
A0A1D6FJH2	Double-stranded DNA-binding family protein	ZEAMMB73_Zm00001d009445	Double-stranded DNA-binding family protein OS=Zea mays OX=4577 GN=ZEAMMB73_Zm00001d009445 PE=4 SV=1 - [A0A1D6FJH2_MAIZE]	37.84	4	4	9	111	12.5035	8.79248	1.68377	0.957133	1.11626	1.25239	0.706069	1.10145	0.909521	0.905681	1.38281	0.235154
B4G087	Adenine nucleotide alpha hydrolase-like superfamily protein	100274324	Adenine nucleotide alpha hydrolase-like superfamily protein OS=Zea mays OX=4577 GN=100274324 PE=2 SV=1 - [B4G087_MAIZE]	37.8	5	5	19	164	17.8674	6.80029	0.956069	0.93502	1.05243	0.981171	0.98499	1.0783	0.897244	0.986844	0.994252	0.933169
B4FKH7	Cytochrome B5 isoform D	100216924	Cytochrome B5 isoform D OS=Zea mays OX=4577 GN=100216924 PE=2 SV=1 - [B4FKH7_MAIZE]	37.78	1	4	14	135	14.8516	5.30029	1.07852	0.947433	1.14138	1.05578	0.931878	1.01435	0.86714	0.937788	1.12581	0.173132
B4FSE9	Histone H2B	ZEAMMB73_Zm00001d020580	Histone H2B OS=Zea mays OX=4577 GN=ZEAMMB73_Zm00001d020580 PE=2 SV=1 - [B4FSE9_MAIZE]	37.75	1	6	30	151	16.4101	9.99365	1.68668		1.24171	1.4642	0.682037		0.820665	0.751351	1.94875	0.0923106
B4F9G8	Pyruvate kinase	100191614	Pyruvate kinase OS=Zea mays OX=4577 GN=100191614 PE=2 SV=1 - [B4F9G8_MAIZE]	37.38	16	16	75	527	57.3069	6.90283	1.04038	1.03842	1.08702	1.05527	1.03549	0.966345	0.955195	0.985678	1.07061	0.0792072
B6SNM4	Protein transport protein Sec61 subunit beta	100280873	Protein transport protein Sec61 subunit beta OS=Zea mays OX=4577 GN=100280873 PE=2 SV=1 - [B6SNM4_MAIZE]	37.38	1	3	30	107	10.6074	11.9272		1.07113	1.09157	1.08135		1.01756	0.913342	0.965451	1.12005	0.160773
B4F9G0	60S ribosomal protein L4-1	ZEAMMB73_Zm00001d013076	60S ribosomal protein L4-1 OS=Zea mays OX=4577 GN=ZEAMMB73_Zm00001d013076 PE=2 SV=1 - [B4F9G0_MAIZE]	37.13	5	15	73	404	44.3119	10.5942	1.05892	1.10365	0.887725	1.01676	1.0117	0.991975	0.917406	0.973693	1.04424	0.580868
B6T8U6	Cytochrome c oxidase polypeptide Vc		Cytochrome c oxidase polypeptide Vc OS=Zea mays OX=4577 PE=2 SV=1 - [B6T8U6_MAIZE]	37.1	3	3	14	62	6.93462	9.31982	0.782359	1.10095	0.975785	0.953031	1.04771	0.952612	0.915366	0.971894	0.980591	0.860525
B4FPL1	Bowman-Birk type wound-induced proteinase inhibitor WIP1	100281945	Bowman-Birk type wound-induced proteinase inhibitor WIP1 OS=Zea mays OX=4577 GN=100281945 PE=2 SV=1 - [B4FPL1_MAIZE]	37.08	4	4	4	89	9.50369	8.33838	1.87312		1.03704	1.45508	0.563956		0.895241	0.729598	1.99436	0.247998
A3KLI1	Dehydrin DHN1	rab17	Dehydrin DHN1 OS=Zea mays OX=4577 GN=rab17 PE=2 SV=1 - [A3KLI1_MAIZE]	36.9	3	3	3	168	17.0651	8.85107	1.29405		0.73165	1.01285	0.862196		1.05665	0.959421	1.05569	0.874034
B6U0S1	Elongation factor 2	LOS1_1	Elongation factor 2 OS=Zea mays OX=4577 GN=LOS1_1 PE=2 SV=1 - [B6U0S1_MAIZE]	36.89	1	26	130	843	93.8616	6.354	0.814111	1.01576	1.02052	0.950129	1.14964	1.05612	1.0466	1.08412	0.876405	0.150818
K7VQ65	Putative translation elongation factor family protein	100272648	Putative translation elongation factor family protein OS=Zea mays OX=4577 GN=100272648 PE=4 SV=1 - [K7VQ65_MAIZE]	36.89	1	26	131	843	93.8456	6.354	0.835943	1.03092	0.962699	0.943188	1.17228	0.999803	1.05498	1.07569	0.876823	0.158228
B6SYB8	Pi starvation-induced protein		Pi starvation-induced protein OS=Zea mays OX=4577 PE=2 SV=1 - [B6SYB8_MAIZE]	36.79	2	2	3	106	11.538	6.29053	1.81281	0.822281	1.25367	1.29625	0.646627	1.0659	0.848777	0.853768	1.51827	0.228176
B4FWR7	60S ribosomal protein L13	100273645	60S ribosomal protein L13 OS=Zea mays OX=4577 GN=100273645 PE=2 SV=2 - [B4FWR7_MAIZE]	36.54	2	7	47	208	23.9222	10.8433	1.06697	0.954139	0.966234	0.99578	0.990466	1.18838	1.05621	1.07835	0.923428	0.293291
A0A3B6U5S8	Uncharacterized protein		Uncharacterized protein OS=Zea mays OX=4577 PE=4 SV=1 - [A0A3B6U5S8_MAIZE]	36.53	7	7	16	219	24.2959	8.74854	0.897498	0.898054	0.958779	0.91811	0.974498	0.934357	1.0467	0.985184	0.931918	0.157674
Q41784	Tubulin beta-7 chain	TUBB7	Tubulin beta-7 chain OS=Zea mays OX=4577 GN=TUBB7 PE=2 SV=1 - [TBB7_MAIZE]	36.4	3	13	116	445	50.0618	4.81787	0.927808	1.06046	1.07047	1.01958	0.998816	0.920603	0.960646	0.960022	1.06204	0.309587
C0PD27	Isocitrate dehydrogenase [NADP]	100272371	Isocitrate dehydrogenase [NADP] OS=Zea mays OX=4577 GN=100272371 PE=2 SV=1 - [C0PD27_MAIZE]	36.39	8	14	67	415	46.1944	6.69775	1.01705	0.988116	1.07383	1.02633	1.03879	1.03262	0.969678	1.0137	1.01247	0.725044
B4FSV6	6-phosphogluconate dehydrogenase, decarboxylating	541700	6-phosphogluconate dehydrogenase, decarboxylating OS=Zea mays OX=4577 GN=541700 PE=2 SV=1 - [B4FSV6_MAIZE]	36.31	4	15	83	482	52.8178	6.29053	1.08316	0.974959	1.09516	1.05109	0.942193	0.98744	0.949874	0.959836	1.09508	0.0884093
B4FB55	Ras-related protein ARA-3	103635765	Ras-related protein ARA-3 OS=Zea mays OX=4577 GN=103635765 PE=2 SV=1 - [B4FB55_MAIZE]	36.28	5	6	35	215	23.8673	8.22119	1.22836	1.08502	1.05866	1.12401	0.941712	0.969329	1.00378	0.971605	1.15686	0.0521049
A0A1D6P848	Sucrose synthase	542247	Sucrose synthase OS=Zea mays OX=4577 GN=542247 PE=3 SV=1 - [A0A1D6P848_MAIZE]	36.19	20	26	203	793	90.481	6.50732	1.11426	0.978364	0.925602	1.00608	0.951035	0.944434	1.03859	0.978019	1.02869	0.683122
B8A1C0	Proliferating cell nuclear antigen	ZEAMMB73_Zm00001d018415	Proliferating cell nuclear antigen OS=Zea mays OX=4577 GN=ZEAMMB73_Zm00001d018415 PE=2 SV=1 - [B8A1C0_MAIZE]	36.12	8	8	22	263	29.3235	4.75439	0.915126	1.12823	0.995972	1.01311	1.05654	0.943483	1.02055	1.00686	1.00621	0.93358
B4FT23	14-3-3-like protein GF14 nu	100283140	14-3-3-like protein GF14 nu OS=Zea mays OX=4577 GN=100283140 PE=2 SV=1 - [B4FT23_MAIZE]	36.11	3	9	37	252	28.5733	4.81787	0.928496	0.917103	1.48912	1.11157	0.992345	1.13278	0.556785	0.893971	1.24341	0.443776
A0A1D6IN01	Peroxidase	ZEAMMB73_Zm00001d022458	Peroxidase OS=Zea mays OX=4577 GN=ZEAMMB73_Zm00001d022458 PE=3 SV=1 - [A0A1D6IN01_MAIZE]	35.93	2	8	54	270	28.4025	9.0415	1.07647	0.957837	0.886709	0.973674	0.972594	1.19095	1.23939	1.13431	0.858384	0.17993
B4FHM5	60S ribosomal protein L37a	100280393	60S ribosomal protein L37a OS=Zea mays OX=4577 GN=100280393 PE=2 SV=1 - [B4FHM5_MAIZE]	35.87	4	4	12	92	10.2364	10.2866	0.981382	1.16544	1.03276	1.05986	0.995535	0.910783	0.975637	0.960652	1.10327	0.176435
C4IYY6	60S acidic ribosomal protein P2A	542323	60S acidic ribosomal protein P2A OS=Zea mays OX=4577 GN=542323 PE=2 SV=1 - [C4IYY6_MAIZE]	35.71	2	2	19	112	11.3456	4.28467	0.955606	0.955683	1.03586	0.982381	1.01406	1.13143	0.995249	1.04691	0.938361	0.268807
B6TFB6	Stress responsive protein		Stress responsive protein OS=Zea mays OX=4577 PE=2 SV=1 - [B6TFB6_MAIZE]	35.68	3	7	31	199	22.1377	7.41553	0.961125	1.28738	1.02207	1.09019	1.08125	0.818444	0.890981	0.930225	1.17197	0.276835
A0A1D6K8Y4	Tobamovirus multiplication protein 2A	100284460	Tobamovirus multiplication protein 2A OS=Zea mays OX=4577 GN=100284460 PE=4 SV=1 - [A0A1D6K8Y4_MAIZE]	35.66	2	3	7	129	14.6664	8.14795	1.23609	0.800827		1.01846	0.919831	1.19812		1.05898	0.961736	0.889753
A0A1D6N1Z8	6-phosphogluconate dehydrogenase, decarboxylating	541699	6-phosphogluconate dehydrogenase, decarboxylating OS=Zea mays OX=4577 GN=541699 PE=3 SV=1 - [A0A1D6N1Z8_MAIZE]	35.63	3	15	82	480	52.6229	6.3667	1.0819	0.929233	1.0118	1.00765	0.978273	1.00482	1.02204	1.00171	1.00592	0.9034
A0A1D6NVW3	Enolase 1	ZEAMMB73_Zm00001d045431	Enolase 1 OS=Zea mays OX=4577 GN=ZEAMMB73_Zm00001d045431 PE=3 SV=1 - [A0A1D6NVW3_MAIZE]	35.62	10	13	105	438	47.0779	5.24951	1.0018	0.968401	0.973303	0.981169	0.969118	1.06511	1.02804	1.02076	0.961218	0.255103
B4G1R3	Ras-related protein RABH1b	100274535	Ras-related protein RABH1b OS=Zea mays OX=4577 GN=100274535 PE=2 SV=1 - [B4G1R3_MAIZE]	35.58	5	8	45	208	22.9147	7.91357	0.985525	1.03442	1.06762	1.02919	0.965334	1.01328	0.973018	0.983877	1.04605	0.182126
C4JBJ2	Tubulin alpha chain	ZEAMMB73_Zm00001d013159	Tubulin alpha chain OS=Zea mays OX=4577 GN=ZEAMMB73_Zm00001d013159 PE=2 SV=1 - [C4JBJ2_MAIZE]	35.56	2	13	83	450	49.5294	5.23682	1.12341	1.19352		1.15846	0.963283	0.818121		0.890702	1.30062	0.0799071
B4FIB2	Ras-related protein RABA1d	100194331	Ras-related protein RABA1d OS=Zea mays OX=4577 GN=100194331 PE=2 SV=1 - [B4FIB2_MAIZE]	35.48	3	8	39	217	23.9501	5.73193	1.06773	0.996239	0.907759	0.990576	0.933599	1.08595	1.14089	1.05348	0.940288	0.461777
C0PJQ8	Uncharacterized protein		Uncharacterized protein OS=Zea mays OX=4577 PE=2 SV=1 - [C0PJQ8_MAIZE]	35.43	10	12	42	350	37.8912	5.97314	1.01815	1.04169	1.12001	1.05995	1.10057	0.938423	0.932345	0.990446	1.07018	0.33256
B6T7A1	Voltage-gated potassium channel beta subunit		Voltage-gated potassium channel beta subunit OS=Zea mays OX=4577 PE=2 SV=1 - [B6T7A1_MAIZE]	35.37	10	10	41	328	36.4892	7.32764	0.997798	0.988061	1.0071	0.997653	0.980269	1.01247	0.982181	0.991641	1.00606	0.636952
B4FU37	Proteasome subunit alpha type		Proteasome subunit alpha type OS=Zea mays OX=4577 PE=2 SV=1 - [B4FU37_MAIZE]	35.34	4	9	36	249	27.2639	6.31592	1.36527	1.13476	0.945749	1.14859	0.849874	0.936502	1.02486	0.937078	1.22572	0.182748
A0A1D6MMY9	ATP/GTP binding protein-like	ZEAMMB73_Zm00001d040079	ATP/GTP binding protein-like OS=Zea mays OX=4577 GN=ZEAMMB73_Zm00001d040079 PE=4 SV=1 - [A0A1D6MMY9_MAIZE]	35.29	1	1	4	34	3.93709	9.46631	0.956589	0.711732	1.0098	0.892705	1.02347	0.670989	0.907386	0.867283	1.02931	0.86328
C0P664	Tubulin beta chain	100382290	Tubulin beta chain OS=Zea mays OX=4577 GN=100382290 PE=2 SV=1 - [C0P664_MAIZE]	35.27	2	13	109	448	50.2608	4.83057	0.73681	1.087	1.07491	0.966238	1.18885	0.841827	1.02476	1.01848	0.948705	0.74896
B4FPR8	Uncharacterized protein		Uncharacterized protein OS=Zea mays OX=4577 PE=2 SV=1 - [B4FPR8_MAIZE]	35.03	1	8	51	294	32.6035	5.93506	0.959216		0.911549	0.935382	0.9564		1.06192	1.00916	0.926892	0.330576
A0A1D6L8E2	Cytochrome b-c1 complex subunit 7	100384355	Cytochrome b-c1 complex subunit 7 OS=Zea mays OX=4577 GN=100384355 PE=3 SV=1 - [A0A1D6L8E2_MAIZE]	34.96	2	4	28	123	14.3204	9.56885	0.948162	0.871354	0.855131	0.891549	0.957681	1.02278	1.12314	1.03453	0.861789	0.063168
A0A1D6KTZ2	Chaperonin2	542707	Chaperonin2 OS=Zea mays OX=4577 GN=542707 PE=3 SV=1 - [A0A1D6KTZ2_MAIZE]	34.73	3	18	67	573	60.6978	5.84619		1.30423	1.14359	1.22391		0.848006	0.907477	0.877741	1.39439	0.0561109
A0A1D6K5Y8	Pathogenesis-related protein 1	103636577	Pathogenesis-related protein 1 OS=Zea mays OX=4577 GN=103636577 PE=3 SV=1 - [A0A1D6K5Y8_MAIZE]	34.64	6	7	58	179	19.1444	9.33447	1.02942	0.872316	0.8831	0.928279	0.902624	0.943129	1.06093	0.968894	0.958081	0.590003
C4J4W3	Hsp70-Hsp90 organizing protein 3	100501647	Hsp70-Hsp90 organizing protein 3 OS=Zea mays OX=4577 GN=100501647 PE=2 SV=1 - [C4J4W3_MAIZE]	34.6	7	16	46	581	65.2778	6.32861	1.28581	1.11026	0.979025	1.12503	0.851745	0.95691	1.0406	0.949752	1.18455	0.168215
B6T5B9	60S ribosomal protein L10	RPL10_0	60S ribosomal protein L10 OS=Zea mays OX=4577 GN=RPL10_0 PE=2 SV=1 - [B6T5B9_MAIZE]	34.55	9	9	35	220	24.8931	10.2427	0.997507	1.06692	1.06629	1.04357	1.03961	0.970097	0.890934	0.966881	1.07932	0.190697
B4FQC6	Glucose-6-phosphate isomerase	100281592	Glucose-6-phosphate isomerase OS=Zea mays OX=4577 GN=100281592 PE=2 SV=1 - [B4FQC6_MAIZE]	34.52	7	21	88	617	67.4965	5.98584	1.00812	0.935291	0.969284	0.970897	1.01062	1.01057	1.00874	1.00998	0.961305	0.136912
B8A377	Cysteine synthase	542438	Cysteine synthase OS=Zea mays OX=4577 GN=542438 PE=2 SV=1 - [B8A377_MAIZE]	34.46	9	9	25	325	34.1119	5.80811	1.34567	1.06714	1.08898	1.16726	0.868846	0.879624	0.967915	0.905462	1.28913	0.0507233
K7UZY7	60S ribosomal protein L23	100193874	60S ribosomal protein L23 OS=Zea mays OX=4577 GN=100193874 PE=3 SV=1 - [K7UZY7_MAIZE]	34.43	5	5	32	122	13.117	10.6968	0.88055	1.07958	1.09088	1.017	1.04757	1.06663	0.907587	1.00726	1.00967	0.914002
B4FV03	Glutathione transferase11	541829	Glutathione transferase11 OS=Zea mays OX=4577 GN=541829 PE=2 SV=1 - [B4FV03_MAIZE]	34.43	6	8	31	305	34.0962	8.104	0.957837	1.11683	1.02064	1.03177	0.998991	0.991848	1.05721	1.01602	1.01551	0.771343
B6SXB4	Uncharacterized protein		Uncharacterized protein OS=Zea mays OX=4577 PE=2 SV=1 - [B6SXB4_MAIZE]	34.38	2	2	5	64	6.85111	7.29834	1.16147	1.02768	0.987445	1.05886	0.918825	0.990667	1.03361	0.981034	1.07933	0.280036
C0PAU7	Glucose-6-phosphate isomerase	100382805	Glucose-6-phosphate isomerase OS=Zea mays OX=4577 GN=100382805 PE=2 SV=1 - [C0PAU7_MAIZE]	34.25	7	21	85	616	67.3886	5.80811	1.06711	0.948543	0.857336	0.957661	0.995641	1.07801	1.13993	1.07119	0.894014	0.198381
B4FAQ9	DREPP4 protein	100191938	DREPP4 protein OS=Zea mays OX=4577 GN=100191938 PE=2 SV=1 - [B4FAQ9_MAIZE]	34.12	6	10	39	211	22.6299	4.90674	1.64342	1.25136	1.07806	1.32428	0.662758	0.846216	1.05562	0.854865	1.54911	0.0809018
Q4A1J4	Cysteine proteinase inhibitor (Fragment)	cc7	Cysteine proteinase inhibitor (Fragment) OS=Zea mays OX=4577 GN=cc7 PE=2 SV=1 - [Q4A1J4_MAIZE]	34.02	3	3	9	97	10.7606	9.68604	0.971104	0.868928	0.912095	0.917376	0.956808	1.17291	1.10635	1.07869	0.850453	0.0838086
B4F946	Tubulin beta chain	100381283	Tubulin beta chain OS=Zea mays OX=4577 GN=100381283 PE=2 SV=1 - [B4F946_MAIZE]	33.78	4	12	92	447	50.0838	4.94482	0.972351	1.06785	1.003	1.0144	1.05331	0.933906	0.992456	0.993223	1.02132	0.659017
A0A1R3M158	Benzoxazinone synthesis9	ZEAMMB73_Zm00001d031209	Benzoxazinone synthesis9 OS=Zea mays OX=4577 GN=ZEAMMB73_Zm00001d031209 PE=4 SV=1 - [A0A1R3M158_MAIZE]	33.77	12	12	72	462	49.9856	5.31299	1.0061	1.00747	1.00781	1.00712	1.02103	0.986822	1.04502	1.01762	0.989683	0.567951
B4FDT0	40S ribosomal protein S20-1	100194044	40S ribosomal protein S20-1 OS=Zea mays OX=4577 GN=100194044 PE=2 SV=1 - [B4FDT0_MAIZE]	33.59	3	4	31	128	13.9934	9.43701	1.05832	1.04885	1.1808	1.09599	0.988998	0.966921	0.826235	0.927385	1.1818	0.0639386
Q9XGC6	Adenosine kinase (Fragment)		Adenosine kinase (Fragment) OS=Zea mays OX=4577 PE=2 SV=1 - [Q9XGC6_MAIZE]	33.53	5	9	35	331	36.0093	5.33838	0.964404	0.986523	1.10224	1.01772	1.05104	1.08916	0.960225	1.03347	0.984759	0.797191
K7V067	Isocitrate dehydrogenase [NADP]	ZEAMMB73_Zm00001d011487	Isocitrate dehydrogenase [NADP] OS=Zea mays OX=4577 GN=ZEAMMB73_Zm00001d011487 PE=3 SV=1 - [K7V067_MAIZE]	33.5	5	12	65	412	46.1675	6.55127	0.968652	1.04659	0.94127	0.985505	1.0418	0.973551	1.02576	1.0137	0.972183	0.495856
B4F9H6	Superoxide dismutase	100193398	Superoxide dismutase OS=Zea mays OX=4577 GN=100193398 PE=2 SV=1 - [B4F9H6_MAIZE]	33.48	1	6	26	233	25.211	7.26904	1.84364		1.15271	1.49817	0.616031		0.939137	0.777584	1.9267	0.199416
B4G194	40S ribosomal protein SA	100282918	40S ribosomal protein SA OS=Zea mays OX=4577 GN=100282918 PE=2 SV=1 - [B4G194_MAIZE]	33.44	2	9	45	308	33.4687	5.08447		1.08294	1.08481	1.08388		1.02913	0.935039	0.982083	1.10365	0.162974
B4FTD2	40S ribosomal protein SA		40S ribosomal protein SA OS=Zea mays OX=4577 PE=2 SV=1 - [B4FTD2_MAIZE]	33.44	2	9	44	308	33.4007	5.08447	1.00761	1.07181	0.969975	1.01647	1.11045	1.06418	1.06213	1.07892	0.942114	0.13707
B6TLX0	NADH-ubiquinone oxidoreductase 10.5 kDa subunit	100283792	NADH-ubiquinone oxidoreductase 10.5 kDa subunit OS=Zea mays OX=4577 GN=100283792 PE=2 SV=1 - [B6TLX0_MAIZE]	33.33	2	3	7	99	11.0948	9.20264	1.02718	1.09354	1.04505	1.05526	0.998399	1.06291	0.934822	0.998711	1.05662	0.249009
A0A1D6GCZ1	Outer envelope pore protein 24A chloroplastic	ZEAMMB73_Zm00001d012820	Outer envelope pore protein 24A chloroplastic OS=Zea mays OX=4577 GN=ZEAMMB73_Zm00001d012820 PE=4 SV=1 - [A0A1D6GCZ1_MAIZE]	33.33	6	7	18	222	23.7363	9.24658	1.19561	1.06534	0.977264	1.0794	0.891171	1.02049	1.09434	1.002	1.07725	0.423306
B6T033	Glutathione S-transferase GSTU6	541850	Glutathione S-transferase GSTU6 OS=Zea mays OX=4577 GN=541850 PE=2 SV=1 - [B6T033_MAIZE]	33.19	8	8	39	238	25.6633	5.22412	1.24922	0.858184	0.939589	1.01567	0.876521	0.991715	0.999341	0.955859	1.06257	0.658725
C0P5U8	Glutathione S-transferase2	ZEAMMB73_Zm00001d024839	Glutathione S-transferase2 OS=Zea mays OX=4577 GN=ZEAMMB73_Zm00001d024839 PE=2 SV=1 - [C0P5U8_MAIZE]	33.18	5	7	53	223	24.5547	6.15088	1.16076	0.982546	1.07034	1.07121	1.00444	1.01467	1.00529	1.00813	1.06257	0.288233
C4J988	Uncharacterized protein		Uncharacterized protein OS=Zea mays OX=4577 PE=2 SV=1 - [C4J988_MAIZE]	33.14	6	6	24	175	20.2497	10.2866	1.01068	1.09153	1.2561	1.11944	0.971494	1.01378	0.817972	0.934414	1.19801	0.11912
B4FQQ1	Reactive Intermediate Deaminase A chloroplastic	100273379	Reactive Intermediate Deaminase A chloroplastic OS=Zea mays OX=4577 GN=100273379 PE=2 SV=1 - [B4FQQ1_MAIZE]	32.96	5	5	13	179	18.8769	9.45166	0.997191	1.08282	0.916956	0.99899	0.963127	0.894931	1.02628	0.961446	1.03905	0.572078
B4FSW5	Peroxidase	100273104	Peroxidase OS=Zea mays OX=4577 GN=100273104 PE=2 SV=1 - [B4FSW5_MAIZE]	32.94	7	9	45	340	36.9772	6.06201	1.0001	1.00946	0.909393	0.972985	0.954829	1.03127	1.07599	1.02069	0.953258	0.373268
C3UZ63	HSP protein	HSP90-2	HSP protein OS=Zea mays OX=4577 GN=HSP90-2 PE=2 SV=1 - [C3UZ63_MAIZE]	32.9	5	21	119	699	80.3118	5.05908	1.04252	1.01975	1.05545	1.03924	1.00217	1.00181	1.03582	1.01327	1.02564	0.166192
B6T6B8	60 ribosomal protein L14		60 ribosomal protein L14 OS=Zea mays OX=4577 PE=2 SV=1 - [B6T6B8_MAIZE]	32.87	1	5	35	143	16.2051	10.4917	0.916154	0.997935	1.0993	1.00446	1.05011	1.1105	0.873216	1.01127	0.993265	0.942503
A0A1D6F4C8	Peroxidase	541674	Peroxidase OS=Zea mays OX=4577 GN=541674 PE=3 SV=1 - [A0A1D6F4C8_MAIZE]	32.81	6	7	33	320	33.4536	8.07471	1.06339	1.03049	1.09021	1.06136	1.05574	1.09082	0.920173	1.02224	1.03827	0.514892
B6TXT3	Uncharacterized protein		Uncharacterized protein OS=Zea mays OX=4577 PE=2 SV=1 - [B6TXT3_MAIZE]	32.79	3	3	8	61	6.7705	10.8286	0.98416	1.00166	0.837816	0.941211	1.05502	1.09338	1.07531	1.07457	0.875895	0.0659918
B6TP36	Prohibitin		Prohibitin OS=Zea mays OX=4577 PE=2 SV=1 - [B6TP36_MAIZE]	32.75	5	9	44	284	30.7444	7.07861	0.998186	0.929048	0.977623	0.968286	1.00654	1.13186	1.05535	1.06458	0.909547	0.0827797
B4FPD1	Membrane steroid-binding protein 1	100280580	Membrane steroid-binding protein 1 OS=Zea mays OX=4577 GN=100280580 PE=2 SV=1 - [B4FPD1_MAIZE]	32.69	3	3	10	104	11.0016	5.51611	1.22817	0.954496		1.09133	0.85345	1.16904		1.01124	1.0792	0.738308
A0A1D6NY66	Ubiquitin receptor RAD23c	100274222	Ubiquitin receptor RAD23c OS=Zea mays OX=4577 GN=100274222 PE=4 SV=1 - [A0A1D6NY66_MAIZE]	32.68	8	9	30	410	43.079	4.729	0.998758	0.980584	1.03872	1.00602	1.02189	1.0052	0.942107	0.989731	1.01646	0.613125
B6U772	LSM7-like	100285982	LSM7-like OS=Zea mays OX=4577 GN=100285982 PE=2 SV=1 - [B6U772_MAIZE]	32.65	2	2	3	98	10.5425	5.0083	1.29795	1.25312	1.20107	1.25071	0.878791	1.30538	0.856704	1.01363	1.2339	0.186021
B6T2Z0	B12D protein	100285481	B12D protein OS=Zea mays OX=4577 GN=100285481 PE=2 SV=1 - [B6T2Z0_MAIZE]	32.65	2	3	16	98	11.0777	9.37842	0.956198	0.983581	1.0602	0.999993	1.05905	1.10471	0.967635	1.0438	0.958033	0.438129
B6SJ08	60S ribosomal protein L18-3	100192878	60S ribosomal protein L18-3 OS=Zea mays OX=4577 GN=100192878 PE=2 SV=1 - [B6SJ08_MAIZE]	32.62	2	6	27	187	21.0296	11.4878	0.978412	1.2192		1.09881	1.00603	0.886177		0.946105	1.1614	0.373934
Q9SBJ3	6-phosphogluconate dehydrogenase isoenzyme A (Fragment)		6-phosphogluconate dehydrogenase isoenzyme A (Fragment) OS=Zea mays OX=4577 PE=2 SV=1 - [Q9SBJ3_MAIZE]	32.58	1	5	25	178	19.0347	5.07178	0.933317		0.832563	0.88294	1.04266		1.13058	1.08662	0.812554	0.09297
B4FGL3	Putative ATP synthase 24 kDa subunit mitochondrial	ZEAMMB73_Zm00001d015134	Putative ATP synthase 24 kDa subunit mitochondrial OS=Zea mays OX=4577 GN=ZEAMMB73_Zm00001d015134 PE=2 SV=1 - [B4FGL3_MAIZE]	32.51	1	9	37	243	27.6358	7.98682	1.74377	1.21708		1.48042	0.602942	0.873652		0.738297	2.00519	0.129076
A0A1D6KCW2	Glyoxylate reductase	ZEAMMB73_Zm00001d030544	Glyoxylate reductase OS=Zea mays OX=4577 GN=ZEAMMB73_Zm00001d030544 PE=3 SV=1 - [A0A1D6KCW2_MAIZE]	32.5	7	8	19	320	34.476	6.29053	0.957406	0.912089	1.01539	0.961628	0.985393	0.99655	1.02181	1.00125	0.960426	0.280442
B6T7Z2	Cytochrome B5 isoform D	ZEAMMB73_Zm00001d011081	Cytochrome B5 isoform D OS=Zea mays OX=4577 GN=ZEAMMB73_Zm00001d011081 PE=2 SV=1 - [B6T7Z2_MAIZE]	32.33	2	3	10	133	14.6654	5.51611	1.08511	0.94711	1.0365	1.02291	0.927168	0.996915	0.941872	0.955318	1.07075	0.212823
A0A1D6LIK1	Peptidyl-prolyl cis-trans isomerase	ZEAMMB73_Zm00001d035761	Peptidyl-prolyl cis-trans isomerase OS=Zea mays OX=4577 GN=ZEAMMB73_Zm00001d035761 PE=3 SV=1 - [A0A1D6LIK1_MAIZE]	32.27	3	7	22	251	26.4275	9.33447	1.05013	0.893253	0.973895	0.972428	0.962794	1.14226	1.15279	1.08595	0.895463	0.211993
B4FAF8	Alba DNA/RNA-binding protein	103649688	Alba DNA/RNA-binding protein OS=Zea mays OX=4577 GN=103649688 PE=2 SV=1 - [B4FAF8_MAIZE]	32.19	2	4	13	146	15.706	5.22412	1.01171	0.93365	1.04339	0.996248	1.0321	1.13592	0.944487	1.0375	0.960235	0.555581
C0PAS9	Alba DNA/RNA-binding protein	100275297	Alba DNA/RNA-binding protein OS=Zea mays OX=4577 GN=100275297 PE=2 SV=1 - [C0PAS9_MAIZE]	32.19	2	4	11	146	15.8631	5.22412	1.27449	0.966641	1.07008	1.10374	0.879706	1.12969	0.930122	0.979839	1.12645	0.354239
B6TCP3	Uncharacterized protein		Uncharacterized protein OS=Zea mays OX=4577 PE=2 SV=1 - [B6TCP3_MAIZE]	32.14	2	2	3	56	6.5082	4.65283	0.910558	0.945732		0.928145	1.00755	0.982975		0.99526	0.932565	0.0887756
A0A1D6E7M4	Protoporphyrinogen IX oxidase2	541866	Protoporphyrinogen IX oxidase2 OS=Zea mays OX=4577 GN=541866 PE=4 SV=1 - [A0A1D6E7M4_MAIZE]	32.14	1	1	2	56	6.16517	7.23975	0.98578	0.933994		0.959887	0.972074	1.21189		1.09198	0.879033	0.394197
C0HGT5	T-complex protein 1 subunit delta	100381530	T-complex protein 1 subunit delta OS=Zea mays OX=4577 GN=100381530 PE=2 SV=1 - [C0HGT5_MAIZE]	31.96	3	14	54	535	57.6967	7.21045	1.1076	1.01915		1.06338	1.00626	0.895663		0.95096	1.11821	0.253279
A0A1D6F1Q4	40S ribosomal protein SA	100283431	40S ribosomal protein SA OS=Zea mays OX=4577 GN=100283431 PE=3 SV=1 - [A0A1D6F1Q4_MAIZE]	31.85	1	8	43	292	31.6869	5.24951		1.11904	1.03098	1.07501		0.992588	0.963508	0.978048	1.09914	0.171656
Q43697	Tubulin beta-5 chain	TUBB5	Tubulin beta-5 chain OS=Zea mays OX=4577 GN=TUBB5 PE=2 SV=1 - [TBB5_MAIZE]	31.69	2	12	115	445	50.0108	4.88135	0.816257	1.05437	0.994881	0.955168	1.12903	0.916029	0.993432	1.01283	0.943068	0.576004
B4FK84	Glutathione S-transferase 3	541990	Glutathione S-transferase 3 OS=Zea mays OX=4577 GN=541990 PE=2 SV=1 - [B4FK84_MAIZE]	31.67	6	6	59	221	23.8797	6.41748	1.08531	0.953728	1.06848	1.03584	0.942351	0.996029	0.943554	0.960644	1.07828	0.16982
B6SNE5	Alfin-like transcription factor	ALF5	Alfin-like transcription factor OS=Zea mays OX=4577 GN=ALF5 PE=2 SV=1 - [B6SNE5_MAIZE]	31.67	2	2	4	60	6.7393	9.11475	1.01623		0.957267	0.986748	0.943621		1.00288	0.973248	1.01387	0.777353
A0A1D6HYR6	Aquaporin PIP2-1	541888	Aquaporin PIP2-1 OS=Zea mays OX=4577 GN=541888 PE=3 SV=1 - [A0A1D6HYR6_MAIZE]	31.62	4	5	33	234	24.3385	7.81104	0.897075	0.962465	0.86608	0.90854	1.01125	0.876294	1.09662	0.994723	0.913359	0.286566
B8A0J4	Phospholipase D		Phospholipase D OS=Zea mays OX=4577 PE=2 SV=1 - [B8A0J4_MAIZE]	31.53	9	20	73	812	92.2141	5.60498	1.00368	1.01502	1.00388	1.00753	1.00978	0.942359	1.02299	0.99171	1.01595	0.564965
A0A1D6E5Z0	Phenylalanine ammonia-lyase	100384215	Phenylalanine ammonia-lyase OS=Zea mays OX=4577 GN=100384215 PE=3 SV=1 - [A0A1D6E5Z0_MAIZE]	31.44	9	18	87	703	75.6078	6.53662	1.05219	1.05319	0.866004	0.990462	0.901373	0.953621	1.0471	0.967365	1.02388	0.774722
B6T7G7	Elongation factor 1-gamma 3	100282446	Elongation factor 1-gamma 3 OS=Zea mays OX=4577 GN=100282446 PE=2 SV=1 - [B6T7G7_MAIZE]	31.41	4	11	53	417	47.2372	6.48096	1.06562	0.947912	0.958672	0.990734	0.983627	1.02328	1.01215	1.00635	0.98448	0.711926
A0A1D6LSP2	Elongation factor gamma1	100192872	Elongation factor gamma1 OS=Zea mays OX=4577 GN=100192872 PE=4 SV=1 - [A0A1D6LSP2_MAIZE]	31.41	4	11	45	417	47.147	6.3667	0.935288	0.97857	0.945329	0.953062	0.949307	0.979854	1.09216	1.00711	0.946336	0.299317
B4F7V3	Protein phosphatase 2C isoform epsilon	100191167	Protein phosphatase 2C isoform epsilon OS=Zea mays OX=4577 GN=100191167 PE=2 SV=1 - [B4F7V3_MAIZE]	31.38	9	9	33	290	31.7153	6.75635	0.972229	0.908799	1.01261	0.964545	0.997	1.07908	1.01737	1.03115	0.935406	0.162929
B6TUC4	Glycine-rich RNA-binding protein 2		Glycine-rich RNA-binding protein 2 OS=Zea mays OX=4577 PE=2 SV=1 - [B6TUC4_MAIZE]	31.37	4	4	29	153	15.6457	9.0415	1.08159	1.08589	1.10715	1.09154	1.01569	1.07064	0.95056	1.0123	1.07829	0.089956
A0A1D6J0S0	Monodehydroascorbate reductase 5 mitochondrial	100272772	Monodehydroascorbate reductase 5 mitochondrial OS=Zea mays OX=4577 GN=100272772 PE=4 SV=1 - [A0A1D6J0S0_MAIZE]	31.35	13	14	79	488	52.518	7.95752	1.11821	0.945238	0.903831	0.989092	0.902325	0.96743	1.08634	0.985366	1.00378	0.967109
A0A1D6N511	Fructokinase1	ZEAMMB73_Zm00001d042536	Fructokinase1 OS=Zea mays OX=4577 GN=ZEAMMB73_Zm00001d042536 PE=3 SV=1 - [A0A1D6N511_MAIZE]	31.34	3	7	43	284	30.4617	4.91943	0.858191	1.04632	1.01879	0.974434	1.07574	0.995831	1.00607	1.02588	0.949849	0.465279
A0A1D6G9Q0	Proteasome subunit alpha type	ZEAMMB73_Zm00001d012546	Proteasome subunit alpha type OS=Zea mays OX=4577 GN=ZEAMMB73_Zm00001d012546 PE=3 SV=1 - [A0A1D6G9Q0_MAIZE]	31.33	3	8	30	249	27.2599	6.31592	1.21164	1.16039	1.03854	1.13685	0.859185	0.932613	1.05167	0.947822	1.19944	0.0677553
B4G1M9	Serine/threonine-protein phosphatase	100381284	Serine/threonine-protein phosphatase OS=Zea mays OX=4577 GN=100381284 PE=2 SV=1 - [B4G1M9_MAIZE]	31.27	5	6	11	307	35.1831	5.32568	0.945207	1.07342	1.06272	1.02712	1.08835	0.942884	1.14334	1.05819	0.970633	0.69044
B6T9P0	UDP-glucose 6-dehydrogenase	100279549	UDP-glucose 6-dehydrogenase OS=Zea mays OX=4577 GN=100279549 PE=2 SV=1 - [B6T9P0_MAIZE]	31.25	13	13	66	480	52.8681	5.99854	0.942815	1.03236	1.09446	1.02321	1.04579	0.950804	0.899621	0.965403	1.05988	0.399798
C0PHG0	Uncharacterized protein		Uncharacterized protein OS=Zea mays OX=4577 PE=2 SV=1 - [C0PHG0_MAIZE]	31.25	3	3	9	96	10.5658	8.19189	1.19568	0.957855	1.02191	1.05848	0.888077	1.0618	0.957109	0.968994	1.09235	0.362616
A0A1D6NR73	B12D protein	ZEAMMB73_Zm00001d044747	B12D protein OS=Zea mays OX=4577 GN=ZEAMMB73_Zm00001d044747 PE=4 SV=1 - [A0A1D6NR73_MAIZE]	30.99	2	3	16	71	7.89303	9.46631	0.985369	0.794834	0.905024	0.895076	1.0002	1.22743	1.17243	1.13336	0.789757	0.053572
A0A1D6N9Q8	Uncharacterized protein	ZEAMMB73_Zm00001d043251	Uncharacterized protein OS=Zea mays OX=4577 GN=ZEAMMB73_Zm00001d043251 PE=4 SV=1 - [A0A1D6N9Q8_MAIZE]	30.99	2	2	3	71	7.91375	4.65283	0.954452	0.946822		0.950637	1.05694	1.12345		1.0902	0.871987	0.0529963
Q4A1J7	Cysteine proteinase inhibitor (Fragment)	cc4	Cysteine proteinase inhibitor (Fragment) OS=Zea mays OX=4577 GN=cc4 PE=2 SV=1 - [Q4A1J7_MAIZE]	30.97	6	6	26	226	24.5479	6.59521	0.962992	0.889347	0.966546	0.939628	0.986256	1.12463	0.975787	1.02889	0.913244	0.174694
B6TR92	Glutathione peroxidase		Glutathione peroxidase OS=Zea mays OX=4577 PE=2 SV=1 - [B6TR92_MAIZE]	30.95	2	5	20	168	18.4474	8.20654	1.1636	1.04374	0.997607	1.06832	1.01274	0.922188	0.898601	0.944509	1.13108	0.11004
B4FUW2	Ribosomal protein L15	100284349	Ribosomal protein L15 OS=Zea mays OX=4577 GN=100284349 PE=2 SV=1 - [B4FUW2_MAIZE]	30.88	8	8	26	204	24.3433	11.6343	0.887679	1.02917	1.09676	1.00453	1.01907	1.08145	0.863155	0.987891	1.01685	0.861503
B4FNW1	Triose phosphate isomerase4	ZEAMMB73_Zm00001d039865	Triose phosphate isomerase4 OS=Zea mays OX=4577 GN=ZEAMMB73_Zm00001d039865 PE=2 SV=1 - [B4FNW1_MAIZE]	30.83	3	6	43	253	27.008	5.68115	0.985842	0.970363	1.04401	1.00007	1.01915	1.04049	0.971064	1.01024	0.989938	0.754893
B6THM9	60S ribosomal protein L22-2	100283364	60S ribosomal protein L22-2 OS=Zea mays OX=4577 GN=100283364 PE=2 SV=1 - [B6THM9_MAIZE]	30.77	3	4	16	130	14.5177	9.43701	1.06606	1.04201	1.26996	1.12601	0.993378	1.01768	0.788729	0.933263	1.20653	0.133133
K7UY19	Fructose-bisphosphate aldolase	100502020	Fructose-bisphosphate aldolase OS=Zea mays OX=4577 GN=100502020 PE=3 SV=1 - [K7UY19_MAIZE]	30.75	3	10	29	387	41.7054	8.77783	1.11352	1.05683	0.964941	1.0451	0.94228	0.967658	1.0468	0.98558	1.06039	0.328463
A0A1D6J1P7	PTI1-like tyrosine-protein kinase 3	100037783	PTI1-like tyrosine-protein kinase 3 OS=Zea mays OX=4577 GN=100037783 PE=3 SV=1 - [A0A1D6J1P7_MAIZE]	30.68	2	8	22	339	36.997	8.29443	0.787641		0.926183	0.856912	1.14995		1.04724	1.0986	0.780005	0.107214
A1YLY2	Cytidine/deoxycytidylate deaminase family protein	CDA1-En	Cytidine/deoxycytidylate deaminase family protein OS=Zea mays OX=4577 GN=CDA1-En PE=2 SV=1 - [A1YLY2_MAIZE]	30.65	4	4	8	186	20.252	5.60498	1.09948	0.912024	0.950027	0.987177	0.952504	1.12551	1.03621	1.03808	0.950968	0.539455
B4FW90	ER luminal binding protein	BIP1	ER luminal binding protein OS=Zea mays OX=4577 GN=BIP1 PE=2 SV=1 - [B4FW90_MAIZE]	30.62	1	17	123	663	73.0397	5.21143		1.06038	1.07517	1.06778		1.08227	1.03811	1.06019	1.00716	0.775496
B4F7V1	2-dehydro-3-deoxyphosphooctonate aldolase 2	100191165	2-dehydro-3-deoxyphosphooctonate aldolase 2 OS=Zea mays OX=4577 GN=100191165 PE=2 SV=1 - [B4F7V1_MAIZE]	30.58	7	7	12	291	31.7267	7.69385	1.29311	1.01065	1.01212	1.10529	0.990083	0.929852	0.936503	0.952146	1.16084	0.185237
Q5K097	NADH dehydrogenase, subunit 9	nad9	NADH dehydrogenase, subunit 9 OS=Zea mays OX=4577 GN=nad9 PE=2 SV=1 - [Q5K097_MAIZE]	30.53	5	5	29	190	22.9165	7.98682	1.03984	0.90604	1.03952	0.995132	0.985461	1.0247	0.979012	0.99639	0.998738	0.979846
A3FMB9	Proteasome subunit alpha type	PAD1	Proteasome subunit alpha type OS=Zea mays OX=4577 GN=PAD1 PE=2 SV=1 - [A3FMB9_MAIZE]	30.52	2	9	27	249	27.2112	8.19189	1.4446	1.19094	0.985802	1.20711	0.827698	0.934849	0.973976	0.912174	1.32334	0.102361
B4FVD5	V-type proton ATPase subunit E3	100273417	V-type proton ATPase subunit E3 OS=Zea mays OX=4577 GN=100273417 PE=2 SV=1 - [B4FVD5_MAIZE]	30.43	7	8	26	230	26.6129	7.00537	0.998366	1.12133	0.983874	1.03452	1.00347	0.937445	0.975388	0.972101	1.06421	0.260078
B4FSJ1	V-type proton ATPase subunit C		V-type proton ATPase subunit C OS=Zea mays OX=4577 PE=2 SV=1 - [B4FSJ1_MAIZE]	30.24	5	11	31	377	42.6368	5.96045	0.977836	0.954779	0.968121	0.966912	0.974288	1.02407	1.04705	1.01514	0.952494	0.098617
B4G0U0	V-type proton ATPase subunit C	100274416	V-type proton ATPase subunit C OS=Zea mays OX=4577 GN=100274416 PE=2 SV=1 - [B4G0U0_MAIZE]	30.24	4	10	35	377	42.5937	5.64307	1.04292	0.947024	0.896096	0.962012	0.954696	1.02027	1.1913	1.05542	0.911496	0.321443
B6SXC2	Uncharacterized protein		Uncharacterized protein OS=Zea mays OX=4577 PE=2 SV=1 - [B6SXC2_MAIZE]	30.23	2	2	7	86	9.76625	8.44092	0.986869	0.969676	1.00878	0.988441	0.93071	1.0756	1.01507	1.00713	0.981447	0.689733
A5H452	Peroxidase 70	PER70	Peroxidase 70 OS=Zea mays OX=4577 GN=PER70 PE=1 SV=1 - [PER70_MAIZE]	30.22	1	7	62	321	33.46	8.89502	1.10059	1.1696	0.978911	1.08303	1.01244	0.967466	1.02515	1.00169	1.08121	0.23622
A0A1D6FSS5	NAD(P)H dehydrogenase (Quinone) FQR1	ZEAMMB73_Zm00001d010698	NAD(P)H dehydrogenase (Quinone) FQR1 OS=Zea mays OX=4577 GN=ZEAMMB73_Zm00001d010698 PE=4 SV=1 - [A0A1D6FSS5_MAIZE]	30.22	2	3	8	182	19.1696	6.37939	1.12922	1.04083	1.43854	1.20287	1.03668	0.991148	0.31569	0.781173	1.53982	0.18338
A0A1D6FKW0	Malate dehydrogenase	ZEAMMB73_Zm00001d009640	Malate dehydrogenase OS=Zea mays OX=4577 GN=ZEAMMB73_Zm00001d009640 PE=3 SV=1 - [A0A1D6FKW0_MAIZE]	30.2	2	7	21	255	26.3299	8.70459	0.909987	1.38127	2.40193	1.5644	0.908279	0.830657		0.869468	1.79926	0.309315
B6SPH3	Mitochondrial import receptor subunit TOM5-like protein	ZEAMMB73_Zm00001d033186	Mitochondrial import receptor subunit TOM5-like protein OS=Zea mays OX=4577 GN=ZEAMMB73_Zm00001d033186 PE=2 SV=1 - [B6SPH3_MAIZE]	30.19	2	2	6	53	5.90203	5.10986	1.39456	1.16382	0.95046	1.16961	0.811919	0.938054	1.111	0.953656	1.22645	0.235435
A0A1D6N4X3	60S ribosomal protein L5-1 homolog a	103650892	60S ribosomal protein L5-1 homolog a OS=Zea mays OX=4577 GN=103650892 PE=3 SV=1 - [A0A1D6N4X3_MAIZE]	30.13	3	7	49	302	34.4188	9.31982	0.867478	0.975389	0.987654	0.943507	1.04506	1.04159	1.0089	1.03185	0.914385	0.0910887
A0A1D6HW85	Nitrile-specifier protein 1	103632137	Nitrile-specifier protein 1 OS=Zea mays OX=4577 GN=103632137 PE=4 SV=2 - [A0A1D6HW85_MAIZE]	30.1	9	9	61	382	40.1793	5.18604	0.986677	0.936771	0.862188	0.928545	1.02392	1.04444	1.15599	1.07478	0.863937	0.055608
A0A1D6E6A8	Glutaredoxin homolog1	100283339	Glutaredoxin homolog1 OS=Zea mays OX=4577 GN=100283339 PE=4 SV=1 - [A0A1D6E6A8_MAIZE]	30	2	2	2	70	7.43978	8.30908	1.06194	1.45109		1.25652	0.995102	0.789773		0.892437	1.40796	0.239775
B4G019	Hydroxyproline-rich glycoprotein family protein	100274292	Hydroxyproline-rich glycoprotein family protein OS=Zea mays OX=4577 GN=100274292 PE=2 SV=1 - [B4G019_MAIZE]	29.97	6	7	25	307	33.3377	6.44287	0.968638	0.937946	1.15026	1.01895	0.976144	1.03964	0.922659	0.979482	1.04029	0.623793
K7UCH1	Putative TCP-1/cpn60 chaperonin family protein	103654524	Putative TCP-1/cpn60 chaperonin family protein OS=Zea mays OX=4577 GN=103654524 PE=3 SV=1 - [K7UCH1_MAIZE]	29.93	15	15	42	548	58.8693	5.42725	1.10386	1.04085	0.982747	1.04249	1.00167	0.944098	1.04014	0.995303	1.04741	0.351112
A0A1D6ETY2	Triose phosphate isomerase2	100193000	Triose phosphate isomerase2 OS=Zea mays OX=4577 GN=100193000 PE=3 SV=1 - [A0A1D6ETY2_MAIZE]	29.87	1	6	20	298	31.5803	7.35693	1.04546	0.994865		1.02016	0.949574	1.06966		1.00962	1.01044	0.886301
A0A1D6PSC4	Protein disulfide-isomerase	606409	Protein disulfide-isomerase OS=Zea mays OX=4577 GN=606409 PE=3 SV=1 - [A0A1D6PSC4_MAIZE]	29.78	9	13	53	460	51.132	5.46533	1.02111	1.0898	0.994851	1.03525	0.979664	1.00153	1.0243	1.00183	1.03336	0.343085
A0A1D6FQ36	Guanosine nucleotide diphosphate dissociation inhibitor	100501867	Guanosine nucleotide diphosphate dissociation inhibitor OS=Zea mays OX=4577 GN=100501867 PE=3 SV=1 - [A0A1D6FQ36_MAIZE]	29.77	2	11	40	430	48.3682	6.26514	0.937948	0.99478	0.969504	0.967411	1.07381	0.944993	1.03485	1.01788	0.950413	0.291095
Q8LK64	Glutathione peroxidase	GP	Glutathione peroxidase OS=Zea mays OX=4577 GN=GP PE=2 SV=1 - [Q8LK64_MAIZE]	29.76	2	5	16	168	18.6083	6.01123	1.48992	0.975484	0.775529	1.08031	0.92638	1.28372	1.15841	1.12284	0.962124	0.866388
B6TJ78	3-N-debenzoyl-2-deoxytaxol N-benzoyltransferase		3-N-debenzoyl-2-deoxytaxol N-benzoyltransferase OS=Zea mays OX=4577 PE=2 SV=1 - [B6TJ78_MAIZE]	29.74	11	11	46	417	46.1263	5.64307	0.938167	0.995297	1.01279	0.982086	0.993914	0.975145	0.995193	0.988084	0.993929	0.81068
B6SGX0	60S ribosomal protein L36	100283331	60S ribosomal protein L36 OS=Zea mays OX=4577 GN=100283331 PE=2 SV=1 - [B6SGX0_MAIZE]	29.73	1	4	16	111	12.5823	11.5757		1.07028	1.17641	1.12335		0.997053	0.879337	0.938195	1.19735	0.14451
Q6RFK3	Peroxidase (Fragment)	pox3	Peroxidase (Fragment) OS=Zea mays OX=4577 GN=pox3 PE=3 SV=1 - [Q6RFK3_MAIZE]	29.69	7	8	63	357	38.3144	6.96143	1.04768	0.970494	0.91772	0.978633	0.972587	1.02248	1.106	1.03369	0.946739	0.367263
C4IZS5	Uncharacterized protein		Uncharacterized protein OS=Zea mays OX=4577 PE=2 SV=1 - [C4IZS5_MAIZE]	29.55	2	2	3	88	10.0767	8.45557	1.13941	0.850697		0.995051	0.949074	1.01416		0.981617	1.01369	0.935935
A0A317YJF2	Uncharacterized protein YsfE	Zm00014a_034839	Uncharacterized protein YsfE OS=Zea mays OX=4577 GN=Zm00014a_034839 PE=4 SV=1 - [A0A317YJF2_MAIZE]	29.5	3	3	11	139	15.0156	6.13818	1.012	0.790082	1.09952	0.967202	0.979592	1.17838	1.02751	1.06183	0.910884	0.437618
B4G029	HXXXD-type acyl-transferase family protein	100283365	HXXXD-type acyl-transferase family protein OS=Zea mays OX=4577 GN=100283365 PE=2 SV=1 - [B4G029_MAIZE]	29.43	11	11	85	435	47.118	7.50342	0.987249	0.972127	0.982	0.980459	0.983171	1.04781	1.02387	1.01828	0.962853	0.122719
B6TRR5	Formate dehydrogenase, mitochondrial		Formate dehydrogenase, mitochondrial OS=Zea mays OX=4577 PE=2 SV=1 - [B6TRR5_MAIZE]	29.26	10	10	34	376	41.3931	6.80029	1.12046	1.0973	0.932992	1.05025	0.859768	0.865214	1.07896	0.934646	1.12369	0.282727
A0A1D6MC13	Dynamin-related protein 1A	ZEAMMB73_Zm00001d038955	Dynamin-related protein 1A OS=Zea mays OX=4577 GN=ZEAMMB73_Zm00001d038955 PE=3 SV=1 - [A0A1D6MC13_MAIZE]	29.25	15	17	50	612	69.102	8.11865	0.927128	1.03827	1.0773	1.01424	1.0226	0.970756	0.942723	0.978692	1.03632	0.521958
K7TH00	Polyamine oxidase1	ZEAMMB73_Zm00001d024281	Polyamine oxidase1 OS=Zea mays OX=4577 GN=ZEAMMB73_Zm00001d024281 PE=4 SV=1 - [K7TH00_MAIZE]	29.2	11	11	43	500	56.3354	6.04932	1.08106	1.0174	0.998342	1.03227	1.00962	1.01103	0.98708	1.00258	1.02961	0.32026
A0A096QRL3	Nana plant2	ZEAMMB73_Zm00001d014887	Nana plant2 OS=Zea mays OX=4577 GN=ZEAMMB73_Zm00001d014887 PE=4 SV=1 - [A0A096QRL3_MAIZE]	29.18	15	15	102	562	65.0692	8.26514	0.923079	0.990112	0.970107	0.961099	1.01598	0.940006	1.04814	1.00137	0.95978	0.345741
B4FRJ3	Proteasome subunit beta	100191806	Proteasome subunit beta OS=Zea mays OX=4577 GN=100191806 PE=2 SV=1 - [B4FRJ3_MAIZE]	29.1	1	7	17	244	26.1081	5.78271		0.943168	0.977311	0.960239		1.05924	1.02368	1.04146	0.922016	0.0810635
A0A1D6NGC3	Ras-related protein RABA1f	ZEAMMB73_Zm00001d043935	Ras-related protein RABA1f OS=Zea mays OX=4577 GN=ZEAMMB73_Zm00001d043935 PE=4 SV=1 - [A0A1D6NGC3_MAIZE]	29.09	3	6	27	220	24.1562	5.51611	0.973329	0.944725	1.03291	0.983656	0.997837	1.07998	1.05908	1.04563	0.940727	0.15854
B6TFY4	40S ribosomal protein S27		40S ribosomal protein S27 OS=Zea mays OX=4577 PE=2 SV=1 - [B6TFY4_MAIZE]	29.07	2	2	10	86	9.55172	8.88037	0.970997	1.07971	0.994117	1.01494	1.10006	1.07388	0.956509	1.04348	0.972647	0.632076
B6T5Q6	Uncharacterized protein		Uncharacterized protein OS=Zea mays OX=4577 PE=2 SV=1 - [B6T5Q6_MAIZE]	29.05	6	6	11	210	23.032	6.39209	1.09888	1.05143	0.967321	1.03921	0.934132	0.962468	0.981039	0.959213	1.0834	0.121536
B4FEA2	Mitochondrial carnitine/acylcarnitine carrier-like protein	Zm00014a_037067	Mitochondrial carnitine/acylcarnitine carrier-like protein OS=Zea mays OX=4577 GN=Zm00014a_037067 PE=2 SV=1 - [B4FEA2_MAIZE]	29.05	8	8	36	296	30.137	9.51025	0.843336	0.951223	0.982204	0.925588	1.05023	1.01211	1.00273	1.02169	0.905936	0.0970469
A0A1D6GMN6	Heat shock 70 kDa protein	100285374	Heat shock 70 kDa protein OS=Zea mays OX=4577 GN=100285374 PE=3 SV=1 - [A0A1D6GMN6_MAIZE]	29.02	10	15	56	610	65.702	5.42725	1.05172	1.01896	1.18089	1.08386	0.914999	0.977841	0.817379	0.903406	1.19974	0.0567387
A0A1D6GJ75	Phosphoglucomutase2	ZEAMMB73_Zm00001d013428	Phosphoglucomutase2 OS=Zea mays OX=4577 GN=ZEAMMB73_Zm00001d013428 PE=3 SV=1 - [A0A1D6GJ75_MAIZE]	28.92	3	16	65	581	62.9137	5.71924	0.911034	1.2828	1.16209	1.11864	1.02083	0.868009	0.871462	0.920101	1.21578	0.174851
K7VX77	Phosphotransferase	ZEAMMB73_Zm00001d010796	Phosphotransferase OS=Zea mays OX=4577 GN=ZEAMMB73_Zm00001d010796 PE=3 SV=1 - [K7VX77_MAIZE]	28.88	5	11	40	509	54.8295	6.62451	1.0301	0.944773	1.01078	0.99522	0.979533	0.902648	0.963263	0.948482	1.04928	0.250973
B6U7D8	Cinnamyl alcohol dehydrogenase 2	CAD2	Cinnamyl alcohol dehydrogenase 2 OS=Zea mays OX=4577 GN=CAD2 PE=2 SV=1 - [B6U7D8_MAIZE]	28.88	9	9	25	367	38.7007	6.39209	1.3848	1.00106	1.27099	1.21895	0.8631	1.00633	0.810004	0.893144	1.36479	0.063627
B4FSK8	Cyclin-dependent kinases regulatory subunit	100280869	Cyclin-dependent kinases regulatory subunit OS=Zea mays OX=4577 GN=100280869 PE=2 SV=1 - [B4FSK8_MAIZE]	28.74	3	3	4	87	10.3733	9.08545	0.763869	0.941935		0.852902	1.16221	1.15958		1.1609	0.734693	0.0743774
C0PKT5	Tubulin alpha chain	ZEAMMB73_Zm00001d021891	Tubulin alpha chain OS=Zea mays OX=4577 GN=ZEAMMB73_Zm00001d021891 PE=2 SV=1 - [C0PKT5_MAIZE]	28.67	2	11	88	450	49.5674	5.05908	1.00387	1.11973	1.05888	1.06083	1.04111	0.947749	0.993646	0.994167	1.06705	0.195741
C0P4M0	Monodehydroascorbate reductase 1 peroxisomal	100382120	Monodehydroascorbate reductase 1 peroxisomal OS=Zea mays OX=4577 GN=100382120 PE=2 SV=1 - [C0P4M0_MAIZE]	28.41	10	12	30	433	46.442	5.8208	0.856926	1.07883	0.882693	0.939484	1.06942	0.920544	1.1385	1.04282	0.900905	0.338336
A0A1D6JXE6	LIM domain-containing protein WLIM2b	100281283	LIM domain-containing protein WLIM2b OS=Zea mays OX=4577 GN=100281283 PE=4 SV=1 - [A0A1D6JXE6_MAIZE]	28.37	4	4	7	141	15.7666	8.74854	1.56665	1.2596		1.41313	0.786718	0.857312		0.822015	1.7191	0.0642516
C0P4U7	Cytochrome-c oxidase	100284414	Cytochrome-c oxidase OS=Zea mays OX=4577 GN=100284414 PE=2 SV=1 - [C0P4U7_MAIZE]	28.36	2	2	11	67	7.67097	9.90576	1.09068	0.982884	0.912072	0.995212	0.952873	1.09946	1.05668	1.03634	0.960315	0.576616
K7VW90	Putative mediator of RNA polymerase II transcription subunit 37c	103635762	Putative mediator of RNA polymerase II transcription subunit 37c OS=Zea mays OX=4577 GN=103635762 PE=3 SV=1 - [K7VW90_MAIZE]	28.35	1	15	135	649	70.912	5.32568	0.989751	0.982967	1.04696	1.00656	1.09212	1.06128	0.826724	0.993377	1.01327	0.885878
B6SJC8	60S ribosomal protein L18	100194344	60S ribosomal protein L18 OS=Zea mays OX=4577 GN=100194344 PE=2 SV=1 - [B6SJC8_MAIZE]	28.34	2	6	38	187	21.1298	11.4292	1.01546	1.06285	1.12062	1.06631	1.02631	1.05776	0.883612	0.989225	1.07792	0.279041
B4FSZ7	Putative mitochondrial-processing peptidase subunit alpha-2 chloroplastic/mitochondrial	100856885	Putative mitochondrial-processing peptidase subunit alpha-2 chloroplastic/mitochondrial OS=Zea mays OX=4577 GN=100856885 PE=2 SV=1 - [B4FSZ7_MAIZE]	28.32	10	12	50	505	54.0605	6.63916	0.965657	0.945369	0.992062	0.967696	1.03972	0.987957	1.04765	1.02511	0.943994	0.0677184
B4FSF1	26S protease regulatory subunit 8 homolog B	100273032	26S protease regulatory subunit 8 homolog B OS=Zea mays OX=4577 GN=100273032 PE=2 SV=1 - [B4FSF1_MAIZE]	28.2	10	12	30	422	47.1708	8.85107	0.951027	1.10192	1.10158	1.05151	1.04498	1.00871	0.947311	1.00033	1.05116	0.425684
Q49HE1	12-oxo-phytodienoic acid reductase	OPR4	12-oxo-phytodienoic acid reductase OS=Zea mays OX=4577 GN=OPR4 PE=2 SV=1 - [Q49HE1_MAIZE]	28.2	7	9	22	383	42.1903	5.85889	0.974878	0.870902	1.14798	0.997921	1.0241	1.01936	0.882256	0.97524	1.02326	0.819775
C0P9R5	Outer envelope pore protein 24A chloroplastic	100382679	Outer envelope pore protein 24A chloroplastic OS=Zea mays OX=4577 GN=100382679 PE=2 SV=1 - [C0P9R5_MAIZE]	28.18	4	5	11	220	23.5672	9.23193	1.05605	1.01096	0.878186	0.981732	0.972042	0.985955	1.17033	1.04278	0.94146	0.504143
B6U666	Fructokinase-1	ZEAMMB73_Zm00001d012173	Fructokinase-1 OS=Zea mays OX=4577 GN=ZEAMMB73_Zm00001d012173 PE=2 SV=1 - [B6U666_MAIZE]	28.17	3	7	36	323	34.582	5.24951	0.895425	1.06534	1.00285	0.987873	1.17104	1.19833	0.973481	1.11428	0.886554	0.217665
B6TZV5	Uncharacterized protein	ZEAMMB73_Zm00001d024471	Uncharacterized protein OS=Zea mays OX=4577 GN=ZEAMMB73_Zm00001d024471 PE=2 SV=1 - [B6TZV5_MAIZE]	28.17	2	2	4	71	7.0877	9.99365	1.24074	0.949249	0.903522	1.03117	0.836195	1.05134	0.99191	0.959815	1.07434	0.594573
B6TFN1	Minor allergen Alt a 7	100283201	Minor allergen Alt a 7 OS=Zea mays OX=4577 GN=100283201 PE=2 SV=1 - [B6TFN1_MAIZE]	28.08	1	4	22	203	21.6559	6.69775	1.36678	1.04106	1.11155	1.17313	0.889675	1.03064	0.832617	0.917643	1.27842	0.0906804
A0A1D6EXF9	Harpin-induced protein	ZEAMMB73_Zm00001d006524	Harpin-induced protein OS=Zea mays OX=4577 GN=ZEAMMB73_Zm00001d006524 PE=4 SV=1 - [A0A1D6EXF9_MAIZE]	28.08	4	5	8	203	22.7094	8.92432	1.19619	1.00349	0.891657	1.03045	0.829797	1.02535	1.01181	0.955654	1.07826	0.530381
B4F9A4	Deoxymugineic acid synthase 1	DMAS1	Deoxymugineic acid synthase 1 OS=Zea mays OX=4577 GN=DMAS1 PE=1 SV=1 - [DMAS1_MAIZE]	28.03	6	7	18	314	35.3549	7.6499	1.02032	0.943005	0.800753	0.921361	0.924476	1.00114	1.02046	0.982025	0.938225	0.439035
A0A1D6JGD2	Plasma membrane ATPase	542052	Plasma membrane ATPase OS=Zea mays OX=4577 GN=542052 PE=3 SV=1 - [A0A1D6JGD2_MAIZE]	27.98	3	23	145	947	104.433	6.93213	1.03814	1.12737	0.944816	1.03678	0.971522	0.831904	1.07911	0.960847	1.07902	0.441065
B6TLU5	Lipid binding protein	100283788	Lipid binding protein OS=Zea mays OX=4577 GN=100283788 PE=2 SV=1 - [B6TLU5_MAIZE]	27.97	3	3	9	118	12.1403	8.95361	0.721961	0.898547	0.989613	0.87004	0.993599	1.06207	1.0406	1.03209	0.842987	0.116452
A0A1D6H3Y8	26S protease regulatory subunit S10B homolog B	100383510	26S protease regulatory subunit S10B homolog B OS=Zea mays OX=4577 GN=100383510 PE=3 SV=1 - [A0A1D6H3Y8_MAIZE]	27.94	3	7	21	272	30.1566	5.90967	1.01093	1.25433		1.13263	1.0709	0.855571		0.963234	1.17586	0.406632
C0P6Q4	Protein BTR1	542422	Protein BTR1 OS=Zea mays OX=4577 GN=542422 PE=2 SV=1 - [C0P6Q4_MAIZE]	27.91	3	8	25	344	37.0076	6.17627	1.05594	1.03305	0.935544	1.00818	0.997217	1.07822	1.0893	1.05491	0.955696	0.375927
C0HE38	U1 small nuclear ribonucleoprotein C		U1 small nuclear ribonucleoprotein C OS=Zea mays OX=4577 PE=2 SV=1 - [C0HE38_MAIZE]	27.91	2	2	3	129	14.4772	9.12939	1.03338	0.965314		0.999348	1.20989	1.10235		1.15612	0.864397	0.132738
B4FS49	T-complex protein 1 subunit epsilon	100272988	T-complex protein 1 subunit epsilon OS=Zea mays OX=4577 GN=100272988 PE=2 SV=1 - [B4FS49_MAIZE]	27.85	2	15	45	535	58.9616	5.74463	1.09922	1.00757	1.03377	1.04685	0.904179	1.03747	0.933804	0.958483	1.0922	0.144031
B6TMH0	60S ribosomal protein L27		60S ribosomal protein L27 OS=Zea mays OX=4577 PE=2 SV=1 - [B6TMH0_MAIZE]	27.74	1	4	18	137	15.5937	10.4771		1.26727	1.1015	1.18439		0.918932	0.968812	0.943872	1.25482	0.108783
B4FDZ6	Uncharacterized protein		Uncharacterized protein OS=Zea mays OX=4577 PE=2 SV=1 - [B4FDZ6_MAIZE]	27.71	4	4	15	166	17.5413	8.60205	1.219	1.03501	1.01179	1.0886	0.900373	1.01974	0.956924	0.959013	1.13513	0.155054
B6T6D2	Dirigent protein	100282340	Dirigent protein OS=Zea mays OX=4577 GN=100282340 PE=2 SV=1 - [B6T6D2_MAIZE]	27.71	4	4	11	166	17.4341	6.29053	0.954362	0.834628	0.94726	0.912083	0.974692	1.06983	1.04404	1.02952	0.88593	0.0709879
B6T8M9	Mitochondrial prohibitin complex protein 2		Mitochondrial prohibitin complex protein 2 OS=Zea mays OX=4577 PE=2 SV=1 - [B6T8M9_MAIZE]	27.68	3	7	38	289	32.0912	9.80322	1.18673	0.995245	1.12654	1.10284	0.921519	1.00309	0.920162	0.948257	1.16302	0.0696712
B6THN2	RuBisCO large subunit-binding protein subunit beta		RuBisCO large subunit-binding protein subunit beta OS=Zea mays OX=4577 PE=2 SV=1 - [B6THN2_MAIZE]	27.6	9	14	42	605	64.4028	5.98584	0.98452	1.02212	1.00629	1.00431	0.996667	0.944998	1.0083	0.983322	1.02134	0.399906
B4FA63	Uncharacterized protein		Uncharacterized protein OS=Zea mays OX=4577 PE=2 SV=1 - [B4FA63_MAIZE]	27.59	4	14	44	580	65.383	6.72705	1.2462	0.938009	1.00354	1.06258	0.88783	1.02839	1.025	0.98041	1.08382	0.475823
B4FW31	Orphans transcription factor	Orphan136	Orphans transcription factor OS=Zea mays OX=4577 GN=Orphan136 PE=2 SV=1 - [B4FW31_MAIZE]	27.59	3	8	22	290	31.1885	4.91943	0.963863		1.03099	0.997428	1.0228		0.92644	0.97462	1.0234	0.735147
B6SNL8	60S ribosomal protein L38	ZEAMMB73_Zm00001d052718	60S ribosomal protein L38 OS=Zea mays OX=4577 GN=ZEAMMB73_Zm00001d052718 PE=2 SV=1 - [B6SNL8_MAIZE]	27.54	1	2	12	69	8.05747	9.83252	0.929509	0.952172	1.04312	0.974933	1.04141	1.02064	1.11471	1.05892	0.920686	0.134966
B4FHI7	60S ribosomal protein L38		60S ribosomal protein L38 OS=Zea mays OX=4577 PE=2 SV=1 - [B4FHI7_MAIZE]	27.54	1	2	6	69	8.01646	10.0083	1.01801		1.01302	1.01552	1.01704		1.03655	1.0268	0.989014	0.379088
B6SIR7	Uncharacterized protein	100276911	Uncharacterized protein OS=Zea mays OX=4577 GN=100276911 PE=2 SV=1 - [B6SIR7_MAIZE]	27.54	4	4	15	167	17.768	8.14795	0.824314	1.03655	0.991257	0.950706	1.08713	0.89612	1.00765	0.996965	0.953601	0.615412
B4FZV6	Uncharacterized protein		Uncharacterized protein OS=Zea mays OX=4577 PE=2 SV=1 - [B4FZV6_MAIZE]	27.53	10	10	26	356	39.8005	8.23584	0.953681	1.06731	1.08715	1.03605	1.03654	0.927769	0.95428	0.972864	1.06495	0.298509
B6THG1	Legumin-like protein		Legumin-like protein OS=Zea mays OX=4577 PE=2 SV=1 - [B6THG1_MAIZE]	27.5	8	9	35	360	37.8485	6.15088	1.06827	0.97347	0.977083	1.00627	0.97945	1.09391	1.0171	1.03015	0.976822	0.629558
B4FEI6	Uncharacterized protein		Uncharacterized protein OS=Zea mays OX=4577 PE=2 SV=1 - [B4FEI6_MAIZE]	27.5	4	4	7	200	21.5131	7.00537	0.989453	1.26085		1.12515	0.975056	0.907302		0.941179	1.19547	0.318944
B6TU33	Rapid alkalinization factor 1		Rapid alkalinization factor 1 OS=Zea mays OX=4577 PE=2 SV=1 - [B6TU33_MAIZE]	27.48	4	4	11	131	13.3215	8.00146	0.51058	0.996322	0.762322	0.756408	1.41707	1.0531	1.21478	1.22832	0.615808	0.0546092
B6T7B6	Glutathione S-transferase, C-terminal-like		Glutathione S-transferase, C-terminal-like OS=Zea mays OX=4577 PE=2 SV=1 - [B6T7B6_MAIZE]	27.47	8	8	14	324	36.4994	6.62451	1.09808	0.948918	1.08777	1.04492	0.988921	1.03028	0.741254	0.920152	1.1356	0.289423
B4FID1	40S ribosomal protein S17-1	100194345	40S ribosomal protein S17-1 OS=Zea mays OX=4577 GN=100194345 PE=2 SV=1 - [B4FID1_MAIZE]	27.46	3	3	32	142	16.4478	10.1401	0.88928	0.989063	1.10664	0.994994	1.04335	1.15903	0.90656	1.03631	0.960129	0.689915
B4FSW0	40S ribosomal protein S10-1	ZEAMMB73_Zm00001d025413	40S ribosomal protein S10-1 OS=Zea mays OX=4577 GN=ZEAMMB73_Zm00001d025413 PE=2 SV=1 - [B4FSW0_MAIZE]	27.37	4	5	24	179	19.9261	9.77393	1.00638	0.986767	1.12054	1.03789	1.03059	1.0949	0.883551	1.00302	1.03477	0.666828
B8QUZ0	Chitinase	chiA	Chitinase OS=Zea mays subsp. parviglumis OX=76912 GN=chiA PE=4 SV=1 - [B8QUZ0_ZEAMP]	27.34	2	7	33	278	29.1436	7.79639	1.04497	1.01183	1.34634	1.13438	0.856493	0.901392	0.894546	0.884144	1.28303	0.0801147
C0PK59	Uncharacterized protein	100283310	Uncharacterized protein OS=Zea mays OX=4577 GN=100283310 PE=2 SV=1 - [C0PK59_MAIZE]	27.33	4	4	23	172	19.7485	9.92041	1.09618	1.13063	1.07946	1.10209	0.994572	1.00262	0.813039	0.936743	1.17651	0.060326
A0A1D6JWL5	Chorismate synthase	ZEAMMB73_Zm00001d028477	Chorismate synthase OS=Zea mays OX=4577 GN=ZEAMMB73_Zm00001d028477 PE=3 SV=1 - [A0A1D6JWL5_MAIZE]	27.24	7	7	20	312	33.1821	9.02686	0.822839	0.960817	1.00672	0.930126	1.04096	1.02104	0.975318	1.01244	0.918697	0.232634
K7VQG5	Phospholipase D	100280155	Phospholipase D OS=Zea mays OX=4577 GN=100280155 PE=3 SV=1 - [K7VQG5_MAIZE]	27.22	6	17	46	812	92.2272	5.69385	0.964163	0.91087	0.903688	0.92624	1.02363	0.883956	1.06272	0.9901	0.935502	0.329099
B6T0D7	Catalytic/ oxidoreductase, acting on NADH or NADPH	100284013	Catalytic/ oxidoreductase, acting on NADH or NADPH OS=Zea mays OX=4577 GN=100284013 PE=2 SV=1 - [B6T0D7_MAIZE]	27.1	3	3	12	107	11.504	8.646	1.19122	0.900479	0.958092	1.0166	0.935205	1.19987	0.979881	1.03832	0.979079	0.866023
A0A1D6H4C1	Citrate synthase	100279573	Citrate synthase OS=Zea mays OX=4577 GN=100279573 PE=3 SV=1 - [A0A1D6H4C1_MAIZE]	27.07	2	9	45	410	45.3785	7.59131	0.951477	0.922795	1.16189	1.01206	1.02085	0.986951	1.33682	1.11487	0.907775	0.487223
C0PJ26	Uncharacterized protein		Uncharacterized protein OS=Zea mays OX=4577 PE=2 SV=1 - [C0PJ26_MAIZE]	27.04	9	9	31	429	48.4915	5.80811	1.00524	1.00018	1.00812	1.00451	1.05482	0.970968	1.00078	1.00886	0.995694	0.868681
B4FM07	2-Cys peroxiredoxin BAS1 chloroplastic	100217217	2-Cys peroxiredoxin BAS1 chloroplastic OS=Zea mays OX=4577 GN=100217217 PE=2 SV=1 - [B4FM07_MAIZE]	26.92	2	6	21	260	28.1466	6.1001	0.992049	1.32684		1.15944	1.00591	0.780825		0.893365	1.29784	0.317905
C0HHQ5	Transmembrane protein 85	100381640	Transmembrane protein 85 OS=Zea mays OX=4577 GN=100381640 PE=2 SV=1 - [C0HHQ5_MAIZE]	26.86	3	3	10	175	18.8827	9.0415	1.15566	0.966004	1.03199	1.05122	0.951174	1.09507	1.12356	1.0566	0.994905	0.947649
B4FSA7	ADP,ATP carrier protein	100284305	ADP,ATP carrier protein OS=Zea mays OX=4577 GN=100284305 PE=2 SV=1 - [B4FSA7_MAIZE]	26.84	5	11	108	380	41.2381	9.80322	1.20789	1.02326	1.05273	1.09462	0.907992	0.980751	0.956941	0.948562	1.15398	0.075251
K7TFB6	ABA-responsive protein	100285725	ABA-responsive protein OS=Zea mays OX=4577 GN=100285725 PE=4 SV=1 - [K7TFB6_MAIZE]	26.84	5	5	6	272	29.1564	6.72705	1.60357	0.975914	1.65938	1.41295	0.593105	1.01938	0.853362	0.82195	1.71903	0.078758
B4FIB9	Uncharacterized protein	100194337	Uncharacterized protein OS=Zea mays OX=4577 GN=100194337 PE=2 SV=1 - [B4FIB9_MAIZE]	26.79	2	2	4	112	12.1073	10.1987	0.705522	0.928475	0.887304	0.840434	1.01188	0.940019	0.973395	0.975097	0.861898	0.133051
A0A1D6JIH7	Opaque endosperm7	ZEAMMB73_Zm00001d026649	Opaque endosperm7 OS=Zea mays OX=4577 GN=ZEAMMB73_Zm00001d026649 PE=4 SV=1 - [A0A1D6JIH7_MAIZE]	26.76	11	11	33	527	55.0987	6.72705	1.1034	0.93113	1.04567	1.02673	0.930568	1.05239	1.01407	0.99901	1.02775	0.678386
B6TB46	Prefoldin subunit 2	100282755	Prefoldin subunit 2 OS=Zea mays OX=4577 GN=100282755 PE=2 SV=1 - [B6TB46_MAIZE]	26.71	3	3	5	146	16.3554	6.06201	0.912484	0.878045	0.89417	0.8949	0.999945	1.14697	0.973854	1.04026	0.860268	0.0568258
K7W544	Putative carboxylesterase 2	100283424	Putative carboxylesterase 2 OS=Zea mays OX=4577 GN=100283424 PE=4 SV=1 - [K7W544_MAIZE]	26.67	4	4	8	330	35.0997	6.37939	1.07177	0.591569	1.10629	0.923211	0.918119	0.761359	0.812152	0.830543	1.11157	0.619459
A0A1D6H1J8	Glyceraldehyde-3-phosphate dehydrogenase	100282981	Glyceraldehyde-3-phosphate dehydrogenase OS=Zea mays OX=4577 GN=100282981 PE=3 SV=1 - [A0A1D6H1J8_MAIZE]	26.67	2	8	34	345	36.8237	7.47412	1.78256	1.36221		1.57238	0.650779	0.796428		0.723603	2.17299	0.0623241
A0A1D6MSE3	Dihydrolipoyl dehydrogenase	103650140	Dihydrolipoyl dehydrogenase OS=Zea mays OX=4577 GN=103650140 PE=3 SV=1 - [A0A1D6MSE3_MAIZE]	26.64	3	11	20	503	52.6627	7.72314	1.51107	0.927965		1.21952	1.89085	1.04429		1.46757	0.830978	0.677031
C4J9R0	PLAT domain-containing protein 3	ZEAMMB73_Zm00001d003457	PLAT domain-containing protein 3 OS=Zea mays OX=4577 GN=ZEAMMB73_Zm00001d003457 PE=2 SV=1 - [C4J9R0_MAIZE]	26.47	4	4	19	204	21.5986	6.87354	0.899133	0.955963	0.990698	0.948598	1.0329	0.936638	1.05988	1.00981	0.939386	0.25366
B4F972	Glutamate decarboxylase	100191549	Glutamate decarboxylase OS=Zea mays OX=4577 GN=100191549 PE=2 SV=1 - [B4F972_MAIZE]	26.37	10	10	29	493	55.1841	5.90967	1.19247	1.00982	1.04864	1.08364	1.00127	0.932133	0.998128	0.977177	1.10895	0.150413
Q9SAZ6	Phosphoenolpyruvate carboxylase2	Ppc1C	Phosphoenolpyruvate carboxylase2 OS=Zea mays OX=4577 GN=Ppc1C PE=2 SV=1 - [Q9SAZ6_MAIZE]	26.35	4	24	128	960	109.36	6.1001	1.0251	0.98383	1.07745	1.02879	1.00187	0.952189	0.974825	0.976293	1.05378	0.161983
B4FTA3	60S ribosomal protein L27	ZEAMMB73_Zm00001d036570	60S ribosomal protein L27 OS=Zea mays OX=4577 GN=ZEAMMB73_Zm00001d036570 PE=2 SV=1 - [B4FTA3_MAIZE]	26.28	1	4	18	137	15.5967	10.6382	1.13576		1.07087	1.10331	1.03679		0.938184	0.987486	1.1173	0.188694
B4FMY6	V-type proton ATPase subunit C	100281241	V-type proton ATPase subunit C OS=Zea mays OX=4577 GN=100281241 PE=2 SV=1 - [B4FMY6_MAIZE]	26.26	2	9	33	377	42.6808	5.64307	1.02308	1.27787	0.845403	1.04878	1.01597	0.794686	1.02695	0.945871	1.1088	0.521225
K7US39	Dihydrolipoyl dehydrogenase	100501719	Dihydrolipoyl dehydrogenase OS=Zea mays OX=4577 GN=100501719 PE=3 SV=1 - [K7US39_MAIZE]	26.25	2	10	23	499	52.6206	7.32764	1.04519	1.01268	0.883931	0.9806	0.936651	0.994049	1.12485	1.01852	0.962772	0.636844
A0A1D6HUU8	Plasma membrane ATPase	ZEAMMB73_Zm00001d019062	Plasma membrane ATPase OS=Zea mays OX=4577 GN=ZEAMMB73_Zm00001d019062 PE=3 SV=1 - [A0A1D6HUU8_MAIZE]	26.24	2	14	71	606	65.5852	5.88428	0.985537	0.902205	0.981354	0.956365	0.957093	0.910585	1.05975	0.975809	0.980074	0.726125
K7UP24	Glycosyltransferase	ZEAMMB73_Zm00001d048707	Glycosyltransferase OS=Zea mays OX=4577 GN=ZEAMMB73_Zm00001d048707 PE=3 SV=1 - [K7UP24_MAIZE]	26.14	8	8	22	459	49.425	5.70654	1.28774	1.03451	1.0093	1.11052	0.903489	1.03395	0.983509	0.973651	1.14057	0.229819
A0A1D6J6Y6	Peroxidase	100382033	Peroxidase OS=Zea mays OX=4577 GN=100382033 PE=3 SV=1 - [A0A1D6J6Y6_MAIZE]	26.11	2	8	25	337	36.3791	7.50342	1.0301		0.831653	0.930877	1.11075		1.09545	1.1031	0.843875	0.225672
B4FAD4	Isocitrate dehydrogenase [NAD] subunit, mitochondrial	100191841	Isocitrate dehydrogenase [NAD] subunit, mitochondrial OS=Zea mays OX=4577 GN=100191841 PE=2 SV=1 - [B4FAD4_MAIZE]	26.03	6	7	30	365	39.6994	6.97607	1.16081	0.999107	1.11172	1.09055	1.00904	0.98122	0.90356	0.964606	1.13056	0.0930065
Q41736	Ferredoxin-NADP reductase (Fragment)		Ferredoxin-NADP reductase (Fragment) OS=Zea mays OX=4577 PE=1 SV=1 - [Q41736_MAIZE]	25.99	7	9	37	327	36.3522	8.1626	1.35013	1.04312	0.883491	1.09225	0.826956	0.943883	1.12378	0.964872	1.13201	0.475343
A0A1D6PH52	ATP synthase subunit gamma	100274172	ATP synthase subunit gamma OS=Zea mays OX=4577 GN=100274172 PE=3 SV=1 - [A0A1D6PH52_MAIZE]	25.95	8	8	24	289	31.4723	8.47021	0.979452	1.04962	1.02823	1.0191	0.96906	1.0414	0.976285	0.995582	1.02362	0.49014
C0P8D8	Uncharacterized protein		Uncharacterized protein OS=Zea mays OX=4577 PE=2 SV=1 - [C0P8D8_MAIZE]	25.89	2	2	7	112	12.3003	8.20654	0.88021	0.793859	0.956936	0.877001	1.09586	1.12646	0.954263	1.05886	0.828249	0.0623934
B6SPB2	Flavoprotein wrbA	100280914	Flavoprotein wrbA OS=Zea mays OX=4577 GN=100280914 PE=2 SV=1 - [B6SPB2_MAIZE]	25.81	5	5	18	248	25.712	7.54736	1.16321	0.944768	0.974504	1.0275	0.878306	1.06792	1.01825	0.988158	1.03981	0.680968
B6SYU0	Histone H2A		Histone H2A OS=Zea mays OX=4577 PE=2 SV=1 - [B6SYU0_MAIZE]	25.79	2	5	45	159	16.4183	10.6089	1.11857	1.16203	0.957863	1.07949	0.914989	0.977207	1.04767	0.979955	1.10157	0.244266
B4FMH5	Histone H2A	103639303	Histone H2A OS=Zea mays OX=4577 GN=103639303 PE=2 SV=1 - [B4FMH5_MAIZE]	25.79	2	5	46	159	16.5044	10.6821	1.34444	1.09635	1.01688	1.15256	0.823312	0.924692	0.919063	0.889023	1.29643	0.0643696
A0A1D6E7V9	Malate synthase	ZEAMMB73_Zm00001d003247	Malate synthase OS=Zea mays OX=4577 GN=ZEAMMB73_Zm00001d003247 PE=3 SV=1 - [A0A1D6E7V9_MAIZE]	25.76	15	15	50	559	61.8053	6.72705	1.04244	0.966575	0.949401	0.986138	0.918704	0.927832	1.04486	0.963799	1.02318	0.67617
B4FAQ5	VIP1 protein	100191935	VIP1 protein OS=Zea mays OX=4577 GN=100191935 PE=2 SV=1 - [B4FAQ5_MAIZE]	25.74	3	6	15	202	21.1876	4.65283	0.97124	0.944574	0.894122	0.936645	1.03099	1.05226	0.950209	1.01115	0.926313	0.124616
A0A1D6LJS9	Chaperonin 60 subunit beta 2 chloroplastic	ZEAMMB73_Zm00001d035937	Chaperonin 60 subunit beta 2 chloroplastic OS=Zea mays OX=4577 GN=ZEAMMB73_Zm00001d035937 PE=3 SV=1 - [A0A1D6LJS9_MAIZE]	25.73	9	14	37	579	61.8128	5.49072	0.995123	1.06458	0.999188	1.01963	1.04124	0.921406	1.00409	0.98891	1.03106	0.504694
A0A1D6NT44	Sucrose synthase	542365	Sucrose synthase OS=Zea mays OX=4577 GN=542365 PE=3 SV=1 - [A0A1D6NT44_MAIZE]	25.73	15	21	112	785	89.855	6.63916	1.05812	0.912484	0.991622	0.98741	0.942813	0.959175	0.991333	0.96444	1.02382	0.632528
B6TMR7	THO complex subunit 4		THO complex subunit 4 OS=Zea mays OX=4577 PE=2 SV=1 - [B6TMR7_MAIZE]	25.69	2	7	22	253	26.7894	10.0522	1.12368	0.993996	1.01978	1.04582	0.966815	1.0919	0.976093	1.0116	1.03382	0.577343
C0HIT1	Peroxidase	PER56	Peroxidase OS=Zea mays OX=4577 GN=PER56 PE=2 SV=1 - [C0HIT1_MAIZE]	25.63	7	8	25	355	38.4868	9.05615	0.939058	1.06234	0.980764	0.994055	1.00224	1.02035	1.03147	1.01802	0.976458	0.554417
B4FMS7	Mitochondrial prohibitin complex protein 2	541818	Mitochondrial prohibitin complex protein 2 OS=Zea mays OX=4577 GN=541818 PE=2 SV=1 - [B4FMS7_MAIZE]	25.61	3	7	33	289	31.8962	9.68604	1.09695	1.02803	0.981072	1.03535	0.912422	0.978772	1.02907	0.973422	1.06362	0.263809
B6SPR5	Fb14	100285915	Fb14 OS=Zea mays OX=4577 GN=100285915 PE=2 SV=1 - [B6SPR5_MAIZE]	25.58	2	2	4	86	10.0228	8.104	1.30246	1.01411	1.02995	1.11551	0.875834	0.892183	0.979406	0.915808	1.21806	0.113743
B4F7V4	Ras-related protein Rab11A		Ras-related protein Rab11A OS=Zea mays OX=4577 PE=2 SV=1 - [B4F7V4_MAIZE]	25.58	2	6	31	215	23.579	6.21436	0.962269	0.957823		0.960046	1.02187	1.10526		1.06357	0.902667	0.131376
B6TH40	Ras-related protein Rab11C		Ras-related protein Rab11C OS=Zea mays OX=4577 PE=2 SV=1 - [B6TH40_MAIZE]	25.57	2	6	31	219	23.9452	6.56592	0.981724	0.78225	1.01294	0.925638	1.11999	1.19699	1.02504	1.114	0.830911	0.0982613
A0A1D6HFX5	Bifunctional dTDP-4-dehydrorhamnose 35-epimerase/dTDP-4-dehydrorhamnose reductase	100286359	Bifunctional dTDP-4-dehydrorhamnose 35-epimerase/dTDP-4-dehydrorhamnose reductase OS=Zea mays OX=4577 GN=100286359 PE=4 SV=1 - [A0A1D6HFX5_MAIZE]	25.49	4	5	13	204	21.9291	7.73779	0.890481	0.962659	0.979399	0.94418	1.03384	1.02584	0.987702	1.01579	0.929499	0.0804882
A0A1D6IKV8	Peroxidase	ZEAMMB73_Zm00001d022280	Peroxidase OS=Zea mays OX=4577 GN=ZEAMMB73_Zm00001d022280 PE=3 SV=1 - [A0A1D6IKV8_MAIZE]	25.43	3	7	18	350	37.6176	6.96143	1.0967	1.09645	0.915775	1.03631	0.957517	1.00472	1.11916	1.02713	1.00893	0.910926
K7US97	Tyrosine-sulfated glycopeptide receptor 1	100284115	Tyrosine-sulfated glycopeptide receptor 1 OS=Zea mays OX=4577 GN=100284115 PE=3 SV=1 - [K7US97_MAIZE]	25.41	1	5	18	185	21.9392	11.5024	0.994395	1.11933	1.06318	1.05897	1.01052	1.02411	0.970054	1.00156	1.05732	0.220817
B6SPG4	Ubiquinol-cytochrome c reductase complex 8.0 kDa protein		Ubiquinol-cytochrome c reductase complex 8.0 kDa protein OS=Zea mays OX=4577 PE=2 SV=1 - [B6SPG4_MAIZE]	25.4	1	2	8	63	7.16768	7.25439	1.25625	1.08553	0.974396	1.10539	0.891956	1.05977	1.08413	1.01195	1.09234	0.410722
B4FBF6	Mitochondrial dicarboxylate/tricarboxylate transporter DTC	100274318	Mitochondrial dicarboxylate/tricarboxylate transporter DTC OS=Zea mays OX=4577 GN=100274318 PE=2 SV=1 - [B4FBF6_MAIZE]	25.32	1	8	45	308	33.1261	9.70068	0.915329	0.957259	1.15985	1.01081	1.00083	0.933481	0.82031	0.918208	1.10085	0.371333
A0A1X7YFG5	Uncharacterized protein		Uncharacterized protein OS=Zea mays OX=4577 PE=4 SV=1 - [A0A1X7YFG5_MAIZE]	25.29	2	8	14	344	37.3685	8.67529	0.826388	1.11137		0.968881	1.0266	0.975818		1.00121	0.967712	0.844
B6SRG5	Acyl-CoA-binding protein	100281027	Acyl-CoA-binding protein OS=Zea mays OX=4577 GN=100281027 PE=2 SV=1 - [B6SRG5_MAIZE]	25.27	1	2	5	91	9.95911	6.07471		0.859932	1.00242	0.931177		1.07693	1.09344	1.08518	0.858083	0.164858
K7VH58	Peroxidase	ZEAMMB73_Zm00001d046184	Peroxidase OS=Zea mays OX=4577 GN=ZEAMMB73_Zm00001d046184 PE=3 SV=1 - [K7VH58_MAIZE]	25.24	5	5	7	313	32.9195	8.20654	1.14874	0.939818	0.935994	1.00818	0.872912	0.951098	1.06835	0.964119	1.0457	0.651328
A0A1D6LVE5	Gibberellin receptor GID1L2	ZEAMMB73_Zm00001d037180	Gibberellin receptor GID1L2 OS=Zea mays OX=4577 GN=ZEAMMB73_Zm00001d037180 PE=4 SV=1 - [A0A1D6LVE5_MAIZE]	25.23	4	6	26	325	34.5824	6.37939	1.00184	0.996549	1.00038	0.999591	0.99893	1.00584	0.966081	0.990283	1.0094	0.493467
B6T8M6	Mitochondrial 2-oxoglutarate/malate carrier protein		Mitochondrial 2-oxoglutarate/malate carrier protein OS=Zea mays OX=4577 PE=2 SV=1 - [B6T8M6_MAIZE]	25.16	1	8	46	310	33.3822	9.70068	1.27747	0.984261	1.05351	1.10508	0.918815	1.00027	0.894003	0.937698	1.1785	0.149985
A0A1D6H6Z3	Dihydrolipoamide acetyltransferase component of pyruvate dehydrogenase complex	541781	Dihydrolipoamide acetyltransferase component of pyruvate dehydrogenase complex OS=Zea mays OX=4577 GN=541781 PE=3 SV=1 - [A0A1D6H6Z3_MAIZE]	25.13	3	9	30	394	42.435	6.01123	1.0203	1.09177	0.929986	1.01402	1.02097	0.917342	1.13603	1.02478	0.989498	0.89772
A0A1D6MN18	Fructose-bisphosphate aldolase	ZEAMMB73_Zm00001d040084	Fructose-bisphosphate aldolase OS=Zea mays OX=4577 GN=ZEAMMB73_Zm00001d040084 PE=3 SV=1 - [A0A1D6MN18_MAIZE]	25.06	1	8	29	387	41.6293	8.17725	0.975768	0.90492	0.868288	0.916325	0.953556	1.17757	1.10125	1.07746	0.850452	0.0916799
A0A1D6KFZ0	Sulfurtransferase	100275494	Sulfurtransferase OS=Zea mays OX=4577 GN=100275494 PE=4 SV=1 - [A0A1D6KFZ0_MAIZE]	25.06	6	8	21	407	43.1934	7.09326	1.05274	0.970968	0.937859	0.98719	0.971996	1.0684	1.02361	1.02133	0.966569	0.481644
B4FS03	Adenine phosphoribosyltransferase 1	ZEAMMB73_Zm00001d030895	Adenine phosphoribosyltransferase 1 OS=Zea mays OX=4577 GN=ZEAMMB73_Zm00001d030895 PE=2 SV=1 - [B4FS03_MAIZE]	25	4	4	14	180	19.3364	5.2749	1.10081	1.04413	1.03677	1.06057	0.960074	1.0804	0.956102	0.998859	1.06178	0.246773
A0A1D6KC46	Hsp20/alpha crystallin family protein	ZEAMMB73_Zm00001d030346	Hsp20/alpha crystallin family protein OS=Zea mays OX=4577 GN=ZEAMMB73_Zm00001d030346 PE=3 SV=1 - [A0A1D6KC46_MAIZE]	25	4	4	14	208	22.6059	9.29053	1.02475	1.15031	1.10988	1.09498	0.857068	1.04182	0.963844	0.954245	1.14748	0.0966599
A0A1D6H658	Peroxidase	ZEAMMB73_Zm00001d016185	Peroxidase OS=Zea mays OX=4577 GN=ZEAMMB73_Zm00001d016185 PE=3 SV=1 - [A0A1D6H658_MAIZE]	24.92	5	5	11	321	33.0896	8.07471	1.08931	1.18102	1.00362	1.09132	0.968945	0.964042	1.05189	0.994958	1.09685	0.175536
B4FBY6	Uncharacterized protein		Uncharacterized protein OS=Zea mays OX=4577 PE=2 SV=1 - [B4FBY6_MAIZE]	24.88	1	8	35	402	44.9722	4.70361	1.40576	1.04477	1.05335	1.16796	0.870065	1.04583	1.06434	0.993414	1.17571	0.262864
B6SI29	Histone H2A	100501869	Histone H2A OS=Zea mays OX=4577 GN=100501869 PE=2 SV=1 - [B6SI29_MAIZE]	24.84	2	5	39	157	16.2552	10.6089	1.13891	1.01005	0.923928	1.0243	0.95222	0.911841	1.04199	0.968685	1.05741	0.490627
O49161	Ubiquinol oxidase (Fragment)	Aox	Ubiquinol oxidase (Fragment) OS=Zea mays OX=4577 GN=Aox PE=3 SV=1 - [O49161_MAIZE]	24.83	1	3	12	149	17.0368	6.80029	0.854786	0.895285		0.875035	1.07299	0.955834		1.01441	0.862604	0.153483
B6SKA0	Glutathione S-transferase 1	ZEAMMB73_Zm00001d012675	Glutathione S-transferase 1 OS=Zea mays OX=4577 GN=ZEAMMB73_Zm00001d012675 PE=2 SV=1 - [B6SKA0_MAIZE]	24.77	4	6	62	214	23.7922	5.61768	1.08608	0.925727	0.952907	0.988239	0.965676	1.06519	1.13655	1.0558	0.936006	0.389531
K7UR93	Ubiquitin family protein	103654835	Ubiquitin family protein OS=Zea mays OX=4577 GN=103654835 PE=4 SV=1 - [K7UR93_MAIZE]	24.75	8	8	28	408	44.9429	5.17334	1.03667	1.00126	1.12506	1.05433	0.998917	0.950705	0.982616	0.977413	1.0787	0.122928
A0A1D6ECC9	Dihydrolipoyllysine-residue succinyltransferase component of 2-oxoglutarate dehydrogenase complex	100284269	Dihydrolipoyllysine-residue succinyltransferase component of 2-oxoglutarate dehydrogenase complex OS=Zea mays OX=4577 GN=100284269 PE=4 SV=1 - [A0A1D6ECC9_MAIZE]	24.66	7	7	19	365	39.6818	6.31592	1.00499	1.00352	1.15484	1.05445	0.968864	1.1302	0.943519	1.01419	1.03969	0.628967
C0P516	Aquaporin PIP2-4	ZEAMMB73_Zm00001d017288	Aquaporin PIP2-4 OS=Zea mays OX=4577 GN=ZEAMMB73_Zm00001d017288 PE=2 SV=1 - [C0P516_MAIZE]	24.65	4	5	35	288	30.3028	7.00537	0.983486	0.961735	0.951092	0.965438	0.965161	0.837873	0.972392	0.925142	1.04356	0.418432
Q30KV7	Cysteine proteinase inhibitor	cpi2	Cysteine proteinase inhibitor OS=Zea mays subsp. parviglumis OX=76912 GN=cpi2 PE=3 SV=1 - [Q30KV7_ZEAMP]	24.63	2	3	10	134	14.8429	6.80029	1.20571	0.883959	1.08965	1.05977	0.936788	1.02327	0.930038	0.963364	1.10008	0.384181
B4FKG6	Uncharacterized protein		Uncharacterized protein OS=Zea mays OX=4577 PE=2 SV=1 - [B4FKG6_MAIZE]	24.59	3	3	6	122	13.9923	9.15869	1.28301		0.934477	1.10874	0.834319		1.10363	0.968974	1.14424	0.590571
B6T8I3	Dirigent protein	100282529	Dirigent protein OS=Zea mays OX=4577 GN=100282529 PE=2 SV=1 - [B6T8I3_MAIZE]	24.56	1	4	23	171	17.5468	6.27783	1.2914	1.01701	1.15664	1.15502	0.891205	1.02686	0.948991	0.955686	1.20857	0.0872414
B6U1C4	Dynamin-related protein 1C		Dynamin-related protein 1C OS=Zea mays OX=4577 PE=2 SV=1 - [B6U1C4_MAIZE]	24.55	11	13	33	611	67.9726	8.23584	0.881797	0.952505	1.04782	0.960709	1.00621	1.00591	0.96435	0.992156	0.968304	0.564051
A0A1D6LSE3	Transducin/WD40 repeat-like superfamily protein	103629787	Transducin/WD40 repeat-like superfamily protein OS=Zea mays OX=4577 GN=103629787 PE=4 SV=1 - [A0A1D6LSE3_MAIZE]	24.5	1	6	17	298	32.0665	5.60498	0.937234	1.04807	1.05985	1.01505	1.01833	0.955771	0.940611	0.971572	1.04475	0.395564
B4F8V9	T-complex protein 1 subunit delta	100191456	T-complex protein 1 subunit delta OS=Zea mays OX=4577 GN=100191456 PE=2 SV=1 - [B4F8V9_MAIZE]	24.49	1	12	52	535	57.6096	7.21045	0.870117	1.00233		0.936226	1.16403	1.21144		1.18773	0.788245	0.0698971
B4G237	Histone H2A	ZEAMMB73_Zm00001d006547	Histone H2A OS=Zea mays OX=4577 GN=ZEAMMB73_Zm00001d006547 PE=2 SV=1 - [B4G237_MAIZE]	24.44	2	4	33	135	14.0356	10.0522	1.33526	1.18261	0.957994	1.15862	0.86203	0.982439	1.05321	0.965893	1.19953	0.192084
A0A1D6JLG7	NADH ubiquinone oxidoreductase B14 subunit5	ZEAMMB73_Zm00001d027389	NADH ubiquinone oxidoreductase B14 subunit5 OS=Zea mays OX=4577 GN=ZEAMMB73_Zm00001d027389 PE=4 SV=1 - [A0A1D6JLG7_MAIZE]	24.42	1	1	4	86	9.8111	10.2573	1.12798	0.841963	1.30962	1.09319	0.873173	1.05039	0.43997	0.787845	1.38757	0.249285
K7UU06	Calmodulin protein 2, touch-induced	ZEAMMB73_Zm00001d008573	Calmodulin protein 2, touch-induced OS=Zea mays OX=4577 GN=ZEAMMB73_Zm00001d008573 PE=4 SV=1 - [K7UU06_MAIZE]	24.39	3	4	7	205	21.1852	4.90674	1.1468	0.854673		1.00073	0.946593	0.992362		0.969477	1.03224	0.852146
A1XCH9	Lipoxygenase	LOX4	Lipoxygenase OS=Zea mays OX=4577 GN=LOX4 PE=2 SV=1 - [A1XCH9_MAIZE]	24.35	10	19	75	887	100.357	6.65381	1.06616	0.921778	0.955426	0.98112	0.886153	0.910136	1.04083	0.945707	1.03745	0.61432
K7UXK5	Putative alcohol dehydrogenase superfamily protein	ZEAMMB73_Zm00001d008377	Putative alcohol dehydrogenase superfamily protein OS=Zea mays OX=4577 GN=ZEAMMB73_Zm00001d008377 PE=4 SV=1 - [K7UXK5_MAIZE]	24.3	7	7	38	358	38.911	6.53662	0.997063	0.970416	1.00262	0.990032	1.01848	1.03768	0.986164	1.01411	0.976259	0.252472
B6SJN3	Protein mago nashi		Protein mago nashi OS=Zea mays OX=4577 PE=2 SV=1 - [B6SJN3_MAIZE]	24.24	3	3	8	165	18.7074	6.20166	1.10584	0.919002	0.942978	0.989273	0.909106	1.10089	1.04063	1.01687	0.972857	0.752047
A0A1D6LZY1	Heat shock protein 4	100217188	Heat shock protein 4 OS=Zea mays OX=4577 GN=100217188 PE=3 SV=1 - [A0A1D6LZY1_MAIZE]	24.22	5	20	75	834	92.3098	5.26221	0.999899	1.03601	1.08978	1.0419	1.02007	0.999141	0.933402	0.984205	1.05862	0.193235
A0A1D6MPA5	Sarcosine oxidase	ZEAMMB73_Zm00001d040228	Sarcosine oxidase OS=Zea mays OX=4577 GN=ZEAMMB73_Zm00001d040228 PE=4 SV=1 - [A0A1D6MPA5_MAIZE]	24.21	7	8	23	413	43.6431	6.91748	1.07373	0.945881	1.01888	1.01283	0.959618	0.961764	0.884548	0.93531	1.08288	0.159316
A0A1X7YE53	Uncharacterized protein		Uncharacterized protein OS=Zea mays OX=4577 PE=4 SV=1 - [A0A1X7YE53_MAIZE]	24.19	2	9	19	430	45.7087	5.85889	0.979283	0.954441	0.869779	0.934501	0.985242	1.08978	1.08733	1.05412	0.886524	0.0666031
B4F9J5	Glutamate dehydrogenase	542220	Glutamate dehydrogenase OS=Zea mays OX=4577 GN=542220 PE=2 SV=1 - [B4F9J5_MAIZE]	24.09	7	10	44	411	44.0416	6.39209	1.15524	1.01201	1.02061	1.06262	0.917422	1.01424	1.0432	0.991622	1.0716	0.302021
B4FFZ7	60S ribosomal protein L32-1	100280220	60S ribosomal protein L32-1 OS=Zea mays OX=4577 GN=100280220 PE=2 SV=1 - [B4FFZ7_MAIZE]	24.06	2	3	9	133	15.7577	10.4917	1.01572	1.1889	1.04254	1.08239	0.961007	0.853974	0.919254	0.911412	1.18759	0.0513911
A0A1D6QFJ7	Clathrin heavy chain	103654268	Clathrin heavy chain OS=Zea mays OX=4577 GN=103654268 PE=3 SV=1 - [A0A1D6QFJ7_MAIZE]	23.99	1	36	128	1588	179.95	5.49072	1.136	0.99268	0.917136	1.01527	0.964539	0.949233	1.13167	1.01515	1.00012	0.998912
A0A1D6IQ43	Clathrin heavy chain	ZEAMMB73_Zm00001d023218	Clathrin heavy chain OS=Zea mays OX=4577 GN=ZEAMMB73_Zm00001d023218 PE=3 SV=1 - [A0A1D6IQ43_MAIZE]	23.99	2	36	129	1588	179.962	5.46533	1.21019	1.11765	0.951706	1.09318	0.883664	0.903967	1.02115	0.936261	1.1676	0.145297
B4F7S3	Aquaporin PIP1-5	ZEAMMB73_Zm00001d051872	Aquaporin PIP1-5 OS=Zea mays OX=4577 GN=ZEAMMB73_Zm00001d051872 PE=2 SV=1 - [B4F7S3_MAIZE]	23.96	5	5	30	288	30.7049	8.1626	1.1075	0.947878	0.899649	0.985008	0.944185	0.876485	1.02456	0.948409	1.03859	0.65528
C0PNV4	Uncharacterized protein		Uncharacterized protein OS=Zea mays OX=4577 PE=2 SV=1 - [C0PNV4_MAIZE]	23.92	8	10	40	464	50.1053	6.17627	0.964193	0.964497	0.993222	0.973971	1.05708	0.981217	0.979364	1.00589	0.968271	0.308083
A0A1D6QCG6	T-complex protein 1 subunit alpha	100283716	T-complex protein 1 subunit alpha OS=Zea mays OX=4577 GN=100283716 PE=3 SV=1 - [A0A1D6QCG6_MAIZE]	23.8	4	10	40	437	47.1078	5.90967	1.11829	0.920153	1.20064	1.0797	0.911162	1.1032	0.834479	0.949615	1.13698	0.322674
C0HIC4	40S ribosomal protein S21	103630203	40S ribosomal protein S21 OS=Zea mays OX=4577 GN=103630203 PE=2 SV=1 - [C0HIC4_MAIZE]	23.75	2	2	18	80	8.87246	7.44482	0.963393	1.01687	1.00718	0.995817	1.04817	1.14253	0.983905	1.0582	0.941046	0.271219
A0A1D6MV33	Plasma membrane ATPase	100502231	Plasma membrane ATPase OS=Zea mays OX=4577 GN=100502231 PE=3 SV=1 - [A0A1D6MV33_MAIZE]	23.74	5	22	107	956	105.405	6.63916	0.911819	1.03384	0.974872	0.973511	0.990509	0.901854	1.02946	0.973939	0.999561	0.993784
B4FNK8	Chorismate mutase	100272431	Chorismate mutase OS=Zea mays OX=4577 GN=100272431 PE=2 SV=1 - [B4FNK8_MAIZE]	23.72	4	7	14	312	34.8979	6.96143	1.04742	0.920492	1.03002	0.999312	0.989808	0.96354	0.98155	0.978299	1.02148	0.631082
B4FQH2	Trans-cinnamate 4-monooxygenase	100272756	Trans-cinnamate 4-monooxygenase OS=Zea mays OX=4577 GN=100272756 PE=2 SV=1 - [B4FQH2_MAIZE]	23.71	6	11	39	502	56.837	8.88037	0.944764	0.903628	0.948482	0.932292	1.0167	0.941773	0.989482	0.982651	0.948752	0.126876
A0A1D6F4V9	26S proteasome regulatory subunit 4 homolog A	ZEAMMB73_Zm00001d007215	26S proteasome regulatory subunit 4 homolog A OS=Zea mays OX=4577 GN=ZEAMMB73_Zm00001d007215 PE=3 SV=1 - [A0A1D6F4V9_MAIZE]	23.71	9	9	22	447	49.4499	6.21436	0.950137	0.945902	0.979609	0.958549	1.05641	1.06928	0.979781	1.03516	0.925995	0.0623843
A5HNY4	Profilin		Profilin OS=Zea mays OX=4577 PE=2 SV=1 - [A5HNY4_MAIZE]	23.66	3	3	10	131	14.255	5.17334	1.13651	1.2057	1.11977	1.15399	1.06706	1.02936	0.851229	0.982552	1.17448	0.0747159
A0A096PQR7	Allene oxide synthase 2	CYP74A2_1	Allene oxide synthase 2 OS=Zea mays OX=4577 GN=CYP74A2_1 PE=4 SV=1 - [A0A096PQR7_MAIZE]	23.65	2	12	50	482	53.0194	7.82568	1.46157		1.21504	1.3383	0.78537		0.833863	0.809616	1.65301	0.0520927
C4JBB8	Heat shock 70 kDa protein 9 mitochondrial	ZEAMMB73_Zm00001d006036	Heat shock 70 kDa protein 9 mitochondrial OS=Zea mays OX=4577 GN=ZEAMMB73_Zm00001d006036 PE=2 SV=1 - [C4JBB8_MAIZE]	23.64	9	14	59	681	72.6988	5.77002	1.32574	1.03337	1.11887	1.15933	0.919848	1.07178	0.907328	0.966318	1.19974	0.130336
B4FNT1	Elongation factor 1-beta	100282885	Elongation factor 1-beta OS=Zea mays OX=4577 GN=100282885 PE=2 SV=1 - [B4FNT1_MAIZE]	23.58	5	6	28	229	24.8374	4.52588	1.46458	1.12632	1.09134	1.22741	0.816128	0.942747	0.974882	0.911252	1.34695	0.0696612
B6TPG2	60S ribosomal protein L26-1	100285268	60S ribosomal protein L26-1 OS=Zea mays OX=4577 GN=100285268 PE=2 SV=1 - [B6TPG2_MAIZE]	23.57	4	4	17	157	17.5206	11.1216	0.890483	0.97225	1.08891	0.983882	1.04034	0.981133	0.922265	0.981245	1.00269	0.970449
B4FCH2	Histone H3	100192746	Histone H3 OS=Zea mays OX=4577 GN=100192746 PE=2 SV=1 - [B4FCH2_MAIZE]	23.53	2	4	37	136	15.3966	11.1509	0.948422	0.836871	0.84158	0.875624	0.950967	1.24018	1.08159	1.09091	0.802654	0.0776258
B4FPT7	Polyubiquitin 2	100282222	Polyubiquitin 2 OS=Zea mays OX=4577 GN=100282222 PE=2 SV=1 - [B4FPT7_MAIZE]	23.53	1	4	180	153	17.0912	6.06201	1.05767	0.987711	1.04754	1.03097	0.966217	1.09015	0.995716	1.01736	1.01338	0.768848
K7UPI1	Dirigent protein	103652771	Dirigent protein OS=Zea mays OX=4577 GN=103652771 PE=3 SV=1 - [K7UPI1_MAIZE]	23.47	4	4	10	196	20.1632	6.88818	1.25461	1.06452	1.05359	1.12424	0.912435	0.982702	0.957248	0.950795	1.18243	0.0643096
B6T9B3	2-cys peroxiredoxin BAS1		2-cys peroxiredoxin BAS1 OS=Zea mays OX=4577 PE=2 SV=1 - [B6T9B3_MAIZE]	23.46	1	5	19	260	28.2166	6.1001	1.03081		0.977203	1.00401	1.11655		1.08963	1.10309	0.910177	0.0806875
B6TXX0	Ribose-phosphate pyrophosphokinase 4	ZEAMMB73_Zm00001d017833	Ribose-phosphate pyrophosphokinase 4 OS=Zea mays OX=4577 GN=ZEAMMB73_Zm00001d017833 PE=2 SV=1 - [B6TXX0_MAIZE]	23.38	5	5	17	325	36.1708	7.07861	1.06414	0.942663	0.974638	0.993813	0.951655	1.01762	1.04743	1.00557	0.988309	0.811166
A0A1D6H287	4-coumarate--CoA ligase 1	542166	4-coumarate--CoA ligase 1 OS=Zea mays OX=4577 GN=542166 PE=4 SV=1 - [A0A1D6H287_MAIZE]	23.35	8	11	36	531	56.34	7.04932	1.01138	0.964254	1.03348	1.00304	1.02368	1.02871	0.981338	1.01124	0.991886	0.762365
A0A317Y4T0	Superoxide dismutase [Cu-Zn]	SODCP	Superoxide dismutase [Cu-Zn] OS=Zea mays OX=4577 GN=SODCP PE=3 SV=1 - [A0A317Y4T0_MAIZE]	23.35	3	3	14	167	17.8814	9.49561	1.23747	1.0469	1.001	1.09512	0.891646	0.980774	0.989515	0.953978	1.14796	0.147974
K7V686	Eukaryotic translation initiation factor 3 subunit F	ZEAMMB73_Zm00001d011100	Eukaryotic translation initiation factor 3 subunit F OS=Zea mays OX=4577 GN=ZEAMMB73_Zm00001d011100 PE=3 SV=1 - [K7V686_MAIZE]	23.34	4	6	19	287	31.341	5.24951	1.01592	0.871594	0.819551	0.902357	0.982595	1.08138	1.20452	1.0895	0.828231	0.0978945
A0A317Y0Q6	Mitochondrial import inner membrane translocase subunit PAM16 like 2	PAM16L2_0	Mitochondrial import inner membrane translocase subunit PAM16 like 2 OS=Zea mays OX=4577 GN=PAM16L2_0 PE=4 SV=1 - [A0A317Y0Q6_MAIZE]	23.28	3	3	5	116	13.1347	9.30518		0.995463	1.04177	1.01862		1.11969	0.908451	1.01407	1.00448	0.970278
P93644	Phytase	phyS11	Phytase OS=Zea mays OX=4577 GN=phyS11 PE=2 SV=1 - [P93644_MAIZE]	23.26	8	8	45	387	41.4649	5.38916	1.06947	1.02452	1.10663	1.06687	0.971691	1.0075	0.906222	0.961805	1.10924	0.0505319
O49010	Herbicide safener binding protein	SBP1	Herbicide safener binding protein OS=Zea mays OX=4577 GN=SBP1 PE=2 SV=1 - [O49010_MAIZE]	23.14	9	9	45	363	40.2265	6.01123	1.02874	1.05507	1.00108	1.0283	1.02354	0.979508	0.952224	0.985091	1.04386	0.17156
A0A1D6MAK9	Phosphotransferase	ZEAMMB73_Zm00001d038792	Phosphotransferase OS=Zea mays OX=4577 GN=ZEAMMB73_Zm00001d038792 PE=3 SV=1 - [A0A1D6MAK9_MAIZE]	23.08	5	10	35	507	54.6573	6.60986	0.944766	0.946707	1.01989	0.970453	1.03631	1.00446	0.923875	0.988216	0.982026	0.691389
B4FTH5	Xyloglucan endotransglucosylase/hydrolase	100285134	Xyloglucan endotransglucosylase/hydrolase OS=Zea mays OX=4577 GN=100285134 PE=2 SV=1 - [B4FTH5_MAIZE]	23.08	5	5	12	286	31.9552	5.87158	0.851423	0.994568	1.00901	0.951668	0.980992	0.979419	0.937675	0.966029	0.985134	0.79707
B6U0V6	Endoplasmin		Endoplasmin OS=Zea mays OX=4577 PE=2 SV=1 - [B6U0V6_MAIZE]	23.05	1	17	61	807	92.774	4.97021	0.994953	1.0712	1.06178	1.04265	1.09471	0.928049	0.85134	0.958032	1.08832	0.326489
K7U9C9	Putative DEAD-box ATP-dependent RNA helicase family protein	ZEAMMB73_Zm00001d048924	Putative DEAD-box ATP-dependent RNA helicase family protein OS=Zea mays OX=4577 GN=ZEAMMB73_Zm00001d048924 PE=4 SV=1 - [K7U9C9_MAIZE]	23.03	11	12	26	608	64.5222	7.89893	0.951171	1.01891	1.00001	0.990032	1.02907	0.971323	0.988158	0.996183	0.993826	0.82773
B4FY83	Peroxidase	ZEAMMB73_Zm00001d009140	Peroxidase OS=Zea mays OX=4577 GN=ZEAMMB73_Zm00001d009140 PE=2 SV=1 - [B4FY83_MAIZE]	23.03	5	7	31	356	37.6288	5.51611	0.980058	0.880587	0.983871	0.948172	0.907733	0.969541	0.931698	0.936324	1.01265	0.772489
A0A1D6GXA2	Clathrin light chain 2	100277113	Clathrin light chain 2 OS=Zea mays OX=4577 GN=100277113 PE=4 SV=1 - [A0A1D6GXA2_MAIZE]	23	3	3	4	200	21.5404	9.5249	1.55755	0.950749	1.22559	1.24463	0.794155	1.04393	0.854672	0.897585	1.38664	0.143183
A0A317YHR9	Purple acid phosphatase	Zm00014a_008379	Purple acid phosphatase OS=Zea mays OX=4577 GN=Zm00014a_008379 PE=3 SV=1 - [A0A317YHR9_MAIZE]	23	11	11	47	626	70.1807	5.85889	1.09894	0.958533	0.999799	1.01909	0.91888	1.00371	0.96459	0.962393	1.05892	0.305916
B6TS21	Succinate--CoA ligase [ADP-forming] subunit beta, mitochondrial	100284286	Succinate--CoA ligase [ADP-forming] subunit beta, mitochondrial OS=Zea mays OX=4577 GN=100284286 PE=2 SV=1 - [B6TS21_MAIZE]	22.99	1	11	41	422	45.1647	6.31592	1.0785	0.955339	1.01804	1.0173	0.985262	1.05804	1.07791	1.0404	0.977788	0.637233
B4FZN6	40S ribosomal protein S7	100274227	40S ribosomal protein S7 OS=Zea mays OX=4577 GN=100274227 PE=2 SV=1 - [B4FZN6_MAIZE]	22.92	2	5	21	192	22.108	9.80322	0.979231	1.06979	1.105	1.05134	0.947041	1.02552	0.907564	0.96004	1.0951	0.148144
A0A1D6JXW2	Protein TOC75-3 chloroplastic	100382028	Protein TOC75-3 chloroplastic OS=Zea mays OX=4577 GN=100382028 PE=4 SV=1 - [A0A1D6JXW2_MAIZE]	22.82	3	12	27	653	72.5408	7.66455	1.20185	1.07299	0.945888	1.07358	0.918398	0.930563	1.06099	0.969983	1.1068	0.29886
B6SZZ6	Non-specific lipid-transfer protein 2	100281901	Non-specific lipid-transfer protein 2 OS=Zea mays OX=4577 GN=100281901 PE=2 SV=1 - [B6SZZ6_MAIZE]	22.77	3	3	6	101	10.3953	8.5874	0.705874	1.10921	0.81561	0.876897	1.10907	0.972479	1.0098	1.03045	0.850982	0.293564
A0A1D6FYA6	Porin1	ZEAMMB73_Zm00001d011242	Porin1 OS=Zea mays OX=4577 GN=ZEAMMB73_Zm00001d011242 PE=4 SV=1 - [A0A1D6FYA6_MAIZE]	22.75	3	3	8	211	22.8136	7.12256	0.978847	1.02277	0.881772	0.96113	0.871371	0.999778	1.03267	0.967938	0.992966	0.920984
B6SWV1	Glucose-6-phosphate 1-dehydrogenase		Glucose-6-phosphate 1-dehydrogenase OS=Zea mays OX=4577 PE=2 SV=1 - [B6SWV1_MAIZE]	22.74	13	14	52	598	67.0143	8.1626	1.00863	0.888337	0.880704	0.92589	0.974112	1.0509	1.10058	1.04186	0.888685	0.104445
B4FMG0	Uncharacterized protein		Uncharacterized protein OS=Zea mays OX=4577 PE=2 SV=1 - [B4FMG0_MAIZE]	22.74	5	5	13	299	30.9437	6.60986	0.836907	0.937974	0.960036	0.911639	1.1048	1.09594	0.979028	1.05992	0.8601	0.0556787
B6TIG6	Transaminase/ transferase, transferring nitrogenous groups		Transaminase/ transferase, transferring nitrogenous groups OS=Zea mays OX=4577 PE=2 SV=1 - [B6TIG6_MAIZE]	22.73	9	9	20	462	49.6727	6.97607	0.98196	1.07451	1.06491	1.04046	0.997342	0.98159	1.02192	1.00028	1.04017	0.272956
B6UD55	NADH dehydrogenase [ubiquinone] 1 alpha subcomplex subunit 8-B	At5g18800_0	NADH dehydrogenase [ubiquinone] 1 alpha subcomplex subunit 8-B OS=Zea mays OX=4577 GN=At5g18800_0 PE=2 SV=1 - [B6UD55_MAIZE]	22.73	1	1	2	110	12.4189	6.50732		1.05765	1.18494	1.1213		0.960504	0.638432	0.799468	1.40255	0.204184
B4FB06	Uncharacterized protein		Uncharacterized protein OS=Zea mays OX=4577 PE=2 SV=1 - [B4FB06_MAIZE]	22.68	5	5	9	313	33.376	6.53662	1.10576	1.09498	0.892609	1.03112	1.03911	0.939039	0.880271	0.952805	1.08219	0.400895
A0A1D6LPQ0	Glycosyl hydrolase family 31 protein	103629642	Glycosyl hydrolase family 31 protein OS=Zea mays OX=4577 GN=103629642 PE=3 SV=1 - [A0A1D6LPQ0_MAIZE]	22.67	11	11	32	591	65.3501	7.06396	0.954399	1.07385	0.95389	0.994046	1.02295	0.986528	1.06782	1.02577	0.969078	0.531042
B6TGG3	ATP binding protein		ATP binding protein OS=Zea mays OX=4577 PE=2 SV=1 - [B6TGG3_MAIZE]	22.65	7	7	12	362	39.6143	6.60986	1.01331	0.952966	0.973679	0.979987	0.959735	0.96998	1.0046	0.978104	1.00192	0.936788
B4FZU8	Malate dehydrogenase	100274264	Malate dehydrogenase OS=Zea mays OX=4577 GN=100274264 PE=2 SV=1 - [B4FZU8_MAIZE]	22.65	2	7	29	340	35.2636	8.104	0.979265	1.1565	1.44186	1.19254	1.12275	0.930593	0.754496	0.935947	1.27416	0.209277
B4FRJ1	Malate dehydrogenase	100272900	Malate dehydrogenase OS=Zea mays OX=4577 GN=100272900 PE=2 SV=1 - [B4FRJ1_MAIZE]	22.65	2	7	18	340	35.6177	7.81104	0.975264	1.41163		1.19345	1.03575	0.838902		0.937328	1.27324	0.396622
C0PBG4	Glutathione peroxidase		Glutathione peroxidase OS=Zea mays OX=4577 PE=2 SV=1 - [C0PBG4_MAIZE]	22.64	2	2	2	106	12.168	5.50342	1.42279		1.00103	1.21191	0.825764		1.24515	1.03546	1.17041	0.613119
A0A1D6QLF5	ARM repeat superfamily protein	100194261	ARM repeat superfamily protein OS=Zea mays OX=4577 GN=100194261 PE=4 SV=1 - [A0A1D6QLF5_MAIZE]	22.61	2	8	35	376	43.5407	5.33838	1.21326	1.07456		1.14391	0.911489	1.00003		0.95576	1.19686	0.149496
A0A1D6IKK3	PLASMODESMATA CALLOSE-BINDING PROTEIN 5	100283720	PLASMODESMATA CALLOSE-BINDING PROTEIN 5 OS=Zea mays OX=4577 GN=100283720 PE=4 SV=1 - [A0A1D6IKK3_MAIZE]	22.52	2	2	3	151	15.1201	4.55127	1.30942	0.92639		1.11791	0.868458	0.949632		0.909045	1.22976	0.397758
C0HII8	Bowman-Birk type trypsin inhibitor	100274196	Bowman-Birk type trypsin inhibitor OS=Zea mays OX=4577 GN=100274196 PE=2 SV=1 - [C0HII8_MAIZE]	22.45	4	4	10	196	21.7188	6.0874	1.3646	0.644206	1.11051	1.03977	0.571897	0.867642	1.08181	0.840449	1.23716	0.482232
B6SQM6	Pathogenesis-related protein 10	100280981	Pathogenesis-related protein 10 OS=Zea mays OX=4577 GN=100280981 PE=2 SV=1 - [B6SQM6_MAIZE]	22.36	3	3	13	161	17.0158	5.21143	1.10819	0.884096	1.34901	1.11377	0.791526	0.993884	0.650245	0.811885	1.37183	0.14535
B4F8V5	NADH dehydrogenase [ubiquinone] iron-sulfur protein 1 mitochondrial	100191453	NADH dehydrogenase [ubiquinone] iron-sulfur protein 1 mitochondrial OS=Zea mays OX=4577 GN=100191453 PE=2 SV=1 - [B4F8V5_MAIZE]	22.34	2	12	35	743	80.628	6.49365	0.992209	0.969283	0.954974	0.972156	1.08032	1.03603	0.985466	1.03394	0.940244	0.104061
B6TIG4	Aspartyl-tRNA synthetase		Aspartyl-tRNA synthetase OS=Zea mays OX=4577 PE=2 SV=1 - [B6TIG4_MAIZE]	22.34	12	12	30	546	60.712	6.25244	0.946365	1.08466	1.03164	1.02089	1.01892	0.956343	0.989183	0.988148	1.03313	0.499525
B4FBH0	Peroxidase	100217011	Peroxidase OS=Zea mays OX=4577 GN=100217011 PE=2 SV=1 - [B4FBH0_MAIZE]	22.32	6	7	17	354	38.0136	7.94287	0.986605	0.973085	0.828597	0.929429	0.968633	1.02954	1.15095	1.04971	0.885416	0.177913
A0A1D6L210	NADH dehydrogenase [ubiquinone] iron-sulfur protein 1 mitochondrial	100280404	NADH dehydrogenase [ubiquinone] iron-sulfur protein 1 mitochondrial OS=Zea mays OX=4577 GN=100280404 PE=3 SV=1 - [A0A1D6L210_MAIZE]	22.31	2	12	34	744	80.666	6.37939	1.06715	0.922563	0.967621	0.985779	1.03786	0.969305	1.06995	1.02571	0.961073	0.485529
C0PFX0	Glucose-6-phosphate 1-dehydrogenase	100383421	Glucose-6-phosphate 1-dehydrogenase OS=Zea mays OX=4577 GN=100383421 PE=2 SV=1 - [C0PFX0_MAIZE]	22.24	6	13	47	517	58.587	7.13721	0.959864	0.947255	1.11219	1.00643	1.01368	1.04685	0.99159	1.01737	0.98925	0.853077
C4J929	Ribosomal protein	100502186	Ribosomal protein OS=Zea mays OX=4577 GN=100502186 PE=2 SV=1 - [C4J929_MAIZE]	22.22	2	4	13	216	24.5642	9.83252	0.873705	0.964288	1.05432	0.964104	1.1405	0.95287	0.946319	1.01323	0.951516	0.582663
B6SUK9	L-ornithine N5-acetyltransferase NATA1	100193115	L-ornithine N5-acetyltransferase NATA1 OS=Zea mays OX=4577 GN=100193115 PE=2 SV=1 - [B6SUK9_MAIZE]	22.22	2	4	6	225	24.1182	6.32861	1.09324	0.967036	0.901804	0.987362	1.00136	1.13069	1.06819	1.06675	0.925583	0.304581
A0A1D6ECL2	2-oxoglutarate dehydrogenase E1 component	100383579	2-oxoglutarate dehydrogenase E1 component OS=Zea mays OX=4577 GN=100383579 PE=4 SV=1 - [A0A1D6ECL2_MAIZE]	22.17	4	16	38	988	112.552	6.59521	1.10605	0.923698		1.01487	0.9713	1.05403		1.01267	1.00218	0.98443
B6TVN0	40S ribosomal protein S16	100284613	40S ribosomal protein S16 OS=Zea mays OX=4577 GN=100284613 PE=2 SV=1 - [B6TVN0_MAIZE]	22.15	1	4	16	149	16.8933	10.6968		1.03184	1.07509	1.05346		1.0899	0.886888	0.988393	1.06583	0.594699
B4FTM9	Uncharacterized protein	100283056	Uncharacterized protein OS=Zea mays OX=4577 GN=100283056 PE=2 SV=1 - [B4FTM9_MAIZE]	22.12	3	6	16	208	21.9091	4.729	1.02079	0.910493	0.936478	0.955919	1.01607	1.11567	1.08148	1.07107	0.892486	0.0600583
B6STB2	Cytochrome c oxidase subunit	100272303	Cytochrome c oxidase subunit OS=Zea mays OX=4577 GN=100272303 PE=2 SV=1 - [B6STB2_MAIZE]	22.08	1	2	5	77	9.03731	7.29834	0.981833		0.936157	0.958995	1.03091		1.09935	1.06513	0.900355	0.123123
B6TKX6	Pyruvate dehydrogenase E1 component subunit beta		Pyruvate dehydrogenase E1 component subunit beta OS=Zea mays OX=4577 PE=2 SV=1 - [B6TKX6_MAIZE]	21.98	3	7	48	373	39.8134	5.75732	1.02497	1.00653	0.988008	1.0065	1.02692	1.0564	1.04692	1.04341	0.964626	0.0551043
A0A1D6P5F8	Putative AMP-dependent synthetase and ligase superfamily protein	ZEAMMB73_Zm00001d046915	Putative AMP-dependent synthetase and ligase superfamily protein OS=Zea mays OX=4577 GN=ZEAMMB73_Zm00001d046915 PE=4 SV=1 - [A0A1D6P5F8_MAIZE]	21.97	5	8	14	437	46.0818	6.18896	0.928848	1.05696	0.896747	0.960853	1.0976	0.939392	1.04823	1.02841	0.934314	0.374649
A0A1D6I134	Enoyl-[acyl-carrier-protein] reductase [NADH] chloroplastic	100192829	Enoyl-[acyl-carrier-protein] reductase [NADH] chloroplastic OS=Zea mays OX=4577 GN=100192829 PE=4 SV=1 - [A0A1D6I134_MAIZE]	21.9	4	7	21	306	32.3508	5.77002	1.27836	1.01982	1.02626	1.10815	0.861862	1.08128	0.993275	0.978806	1.13214	0.290794
B4FIY7	NEDD8-conjugating enzyme Ubc12	100286302	NEDD8-conjugating enzyme Ubc12 OS=Zea mays OX=4577 GN=100286302 PE=2 SV=1 - [B4FIY7_MAIZE]	21.86	4	4	11	183	20.6155	8.23584	1.55675	1.06348	1.17811	1.26611	0.735219	1.02483	0.863578	0.874543	1.44774	0.0838331
Q6RW09	Allene oxide cyclase	aoc	Allene oxide cyclase OS=Zea mays OX=4577 GN=aoc PE=2 SV=1 - [Q6RW09_MAIZE]	21.85	2	4	14	238	25.7613	8.93896	1.01351	1.01645	0.96679	0.998917	1.02984	0.886159	0.919421	0.945141	1.0569	0.310121
B4FUX0	Allene oxide cyclase 3 chloroplastic	100273356	Allene oxide cyclase 3 chloroplastic OS=Zea mays OX=4577 GN=100273356 PE=2 SV=1 - [B4FUX0_MAIZE]	21.85	2	4	8	238	25.9863	9.21729	1.09545	0.978387	0.995062	1.02297	1.00303	1.08384	1.08087	1.05591	0.968797	0.505788
B6UH30	PEBP (Phosphatidylethanolamine-binding protein) family protein	100279044	PEBP (Phosphatidylethanolamine-binding protein) family protein OS=Zea mays OX=4577 GN=100279044 PE=2 SV=1 - [B6UH30_MAIZE]	21.84	3	3	14	174	18.7175	5.71924	0.978403	0.8021	0.930561	0.903688	0.939415	0.957914	0.95143	0.949586	0.951665	0.434669
A0A1D6QQD8	Acetyltransferase component of pyruvate dehydrogenase complex	ZEAMMB73_Zm00001d053580	Acetyltransferase component of pyruvate dehydrogenase complex OS=Zea mays OX=4577 GN=ZEAMMB73_Zm00001d053580 PE=3 SV=1 - [A0A1D6QQD8_MAIZE]	21.8	3	9	28	422	45.4596	5.85889	1.50744	1.16662	1.07743	1.2505	0.742757	0.91977	0.928609	0.863712	1.44782	0.055238
B6SJU3	Histone H2A	100501984	Histone H2A OS=Zea mays OX=4577 GN=100501984 PE=2 SV=1 - [B6SJU3_MAIZE]	21.79	1	4	38	156	16.1852	10.6089	1.13944	1.1302	0.998896	1.08951	0.957343	0.917429	1.06262	0.979131	1.11274	0.153294
A0A1D6N0U0	NADPH:quinone oxidoreductase	100282318	NADPH:quinone oxidoreductase OS=Zea mays OX=4577 GN=100282318 PE=4 SV=1 - [A0A1D6N0U0_MAIZE]	21.78	3	4	10	202	21.8673	6.55127		0.998825	1.06534	1.03208		1.03461	0.937548	0.986078	1.04666	0.516102
K7USN8	Gamma carbonic anhydrase 1 mitochondrial	103634649	Gamma carbonic anhydrase 1 mitochondrial OS=Zea mays OX=4577 GN=103634649 PE=4 SV=1 - [K7USN8_MAIZE]	21.67	3	5	14	263	28.4014	7.56201	1.24834	1.01728	0.951274	1.0723	0.914199	0.916108	0.905427	0.911912	1.17588	0.149731
B4FY98	Arogenate dehydrogenase 1 chloroplastic	100281038	Arogenate dehydrogenase 1 chloroplastic OS=Zea mays OX=4577 GN=100281038 PE=2 SV=1 - [B4FY98_MAIZE]	21.67	6	6	13	360	40.2476	8.76318	0.945114	0.961451	0.887955	0.931507	0.972627	0.93073	1.07213	0.991828	0.939181	0.272818
A0A1D6LNJ7	60S acidic ribosomal protein P3-2	103629584	60S acidic ribosomal protein P3-2 OS=Zea mays OX=4577 GN=103629584 PE=3 SV=1 - [A0A1D6LNJ7_MAIZE]	21.67	2	2	13	120	11.9845	4.4624	0.961652	0.947801	0.909933	0.939795	1.21282	1.1502	0.984879	1.11596	0.842137	0.0648977
A0A1D6PC23	Calcium-dependent phosphotriesterase superfamily protein	ZEAMMB73_Zm00001d047638	Calcium-dependent phosphotriesterase superfamily protein OS=Zea mays OX=4577 GN=ZEAMMB73_Zm00001d047638 PE=4 SV=1 - [A0A1D6PC23_MAIZE]	21.66	7	7	15	337	35.7025	8.32373	1.04624	1.00261	1.15517	1.06801	1.03373	0.978126	0.900597	0.970819	1.10011	0.178106
B6UDC2	Actin-interacting protein 1-2	100192950	Actin-interacting protein 1-2 OS=Zea mays OX=4577 GN=100192950 PE=2 SV=1 - [B6UDC2_MAIZE]	21.64	2	11	19	610	66.2454	6.82959	1.04351	0.831835		0.93767	1.16356	0.954352		1.05895	0.885468	0.500662
B4G1B0	Remorin family protein	100304007	Remorin family protein OS=Zea mays OX=4577 GN=100304007 PE=2 SV=1 - [B4G1B0_MAIZE]	21.61	6	6	13	199	21.8184	5.87158	1.44401	1.14122	1.08123	1.22215	0.739332	0.924861	0.943214	0.869135	1.40617	0.0529898
B6TAN8	Uncharacterized protein		Uncharacterized protein OS=Zea mays OX=4577 PE=2 SV=1 - [B6TAN8_MAIZE]	21.58	2	2	4	139	14.6565	8.42627	1.11266	0.999602	1.03931	1.05052	0.937667	0.958702	1.0069	0.967755	1.08553	0.100728
B4FDN9	V-type proton ATPase subunit D	100193069	V-type proton ATPase subunit D OS=Zea mays OX=4577 GN=100193069 PE=2 SV=1 - [B4FDN9_MAIZE]	21.56	7	7	20	269	29.1117	9.80322	1.14969	0.977209	0.996638	1.04118	0.934454	1.10908	1.04426	1.02926	1.01158	0.880922
B8A095	Acetylserotonin O-methyltransferase 1	ASMT1_0	Acetylserotonin O-methyltransferase 1 OS=Zea mays OX=4577 GN=ASMT1_0 PE=2 SV=1 - [B8A095_MAIZE]	21.51	6	6	18	372	40.5701	5.13525	1.03939	1.15253	0.951826	1.04792	1.10741	0.902311	1.06029	1.02334	1.02402	0.786798
A0A1D6H703	Aminopeptidase	ZEAMMB73_Zm00001d016373	Aminopeptidase OS=Zea mays OX=4577 GN=ZEAMMB73_Zm00001d016373 PE=3 SV=1 - [A0A1D6H703_MAIZE]	21.5	18	19	54	879	98.8226	5.61768	0.980692	1.00636	1.00948	0.998845	0.971771	0.972704	1.01743	0.987301	1.01169	0.547934
A0A1D6KXF9	Phenylalanine ammonia-lyase	ZEAMMB73_Zm00001d033286	Phenylalanine ammonia-lyase OS=Zea mays OX=4577 GN=ZEAMMB73_Zm00001d033286 PE=3 SV=1 - [A0A1D6KXF9_MAIZE]	21.49	12	13	45	698	75.61	6.21436	1.27504	1.09579	0.886282	1.0857	0.913961	0.966168	1.10476	0.994963	1.0912	0.511071
A0A1D6GYU6	Rho-related protein from plants 9	542094	Rho-related protein from plants 9 OS=Zea mays OX=4577 GN=542094 PE=4 SV=1 - [A0A1D6GYU6_MAIZE]	21.43	1	1	6	98	10.8039	9.5542	0.836696	0.916605	1.2131	0.988801	1.12883	1.10803	1.17524	1.13737	0.869376	0.27023
C0PGG5	Pyruvate kinase	542177	Pyruvate kinase OS=Zea mays OX=4577 GN=542177 PE=2 SV=1 - [C0PGG5_MAIZE]	21.41	7	8	30	509	54.9554	7.15186	1.13034	1.04626	0.946244	1.04095	1.03401	0.96716	1.07357	1.02491	1.01565	0.807464
A0A1D6NP54	RNA binding (RRM/RBD/RNP motifs) family protein	100274116	RNA binding (RRM/RBD/RNP motifs) family protein OS=Zea mays OX=4577 GN=100274116 PE=4 SV=1 - [A0A1D6NP54_MAIZE]	21.36	2	2	2	103	11.4044	6.56592	0.725162	1.21691		0.971037	1.28125	0.942885		1.11207	0.87318	0.68309
C0HEE6	Peroxidase	ZEAMMB73_Zm00001d020808	Peroxidase OS=Zea mays OX=4577 GN=ZEAMMB73_Zm00001d020808 PE=2 SV=1 - [C0HEE6_MAIZE]	21.33	5	5	11	347	37.9798	5.52881	1.0396	0.854791	0.914366	0.936254	0.939609	1.07774	1.13803	1.05179	0.890152	0.222628
B4FU52	Histone H2A	100273269	Histone H2A OS=Zea mays OX=4577 GN=100273269 PE=2 SV=1 - [B4FU52_MAIZE]	21.33	2	4	12	150	15.7139	10.6382		1.07452	1.02236	1.04844		0.984053	1.04449	1.01427	1.03369	0.482171
Q64HC1	ASF/SF2-like pre-mRNA splicing factor SRP32''	srp32	ASF/SF2-like pre-mRNA splicing factor SRP32'' OS=Zea mays OX=4577 GN=srp32 PE=4 SV=1 - [Q64HC1_MAIZE]	21.33	3	3	11	150	16.6502	8.17725	1.15292	0.994052	1.00073	1.04923	0.893632	1.01727	1.04258	0.984496	1.06576	0.40339
C4JBJ3	Calmodulin-7	100502442	Calmodulin-7 OS=Zea mays OX=4577 GN=100502442 PE=2 SV=1 - [C4JBJ3_MAIZE]	21.31	1	4	15	183	20.4501	4.91943		0.964464	1.03676	1.00061		0.974471	0.948325	0.961398	1.04079	0.414966
A0A1D6GPV2	3-ketoacyl-CoA thiolase 2 peroxisomal	ZEAMMB73_Zm00001d014093	3-ketoacyl-CoA thiolase 2 peroxisomal OS=Zea mays OX=4577 GN=ZEAMMB73_Zm00001d014093 PE=3 SV=1 - [A0A1D6GPV2_MAIZE]	21.25	6	7	16	433	44.9904	7.92822	0.865543	1.0521	0.934807	0.950816	1.07243	1.01792	1.04193	1.04409	0.910663	0.175202
B6TY47	UDP-glucuronic acid decarboxylase 1		UDP-glucuronic acid decarboxylase 1 OS=Zea mays OX=4577 PE=2 SV=1 - [B6TY47_MAIZE]	21.23	4	7	22	405	45.2686	9.40771	0.937683	0.896996		0.91734	0.971027	0.954589		0.962808	0.952775	0.174015
K7V763	Cytochrome c oxidase subunit 5b-2 mitochondrial	100277708	Cytochrome c oxidase subunit 5b-2 mitochondrial OS=Zea mays OX=4577 GN=100277708 PE=4 SV=1 - [K7V763_MAIZE]	21.21	3	3	11	165	17.8787	5.08447	1.18441	0.964705	0.908896	1.01934	0.91695	0.969286	1.02091	0.96905	1.05189	0.60338
A0A1D6GEX5	Short chain alcohol dehydrogenase1	100282128	Short chain alcohol dehydrogenase1 OS=Zea mays OX=4577 GN=100282128 PE=4 SV=1 - [A0A1D6GEX5_MAIZE]	21.2	5	5	7	283	29.3018	6.16357	1.0302	0.901696	0.965424	0.965774	0.981768	0.95451	1.06504	1.00044	0.965349	0.5248
B4FRG9	Uncharacterized protein		Uncharacterized protein OS=Zea mays OX=4577 PE=2 SV=1 - [B4FRG9_MAIZE]	21.18	3	3	4	170	18.9606	8.39697	1.0816		0.97283	1.02721	0.913578		1.0236	0.968589	1.06053	0.527656
A0A1D6GRB4	Alanine aminotransferase5	100216685	Alanine aminotransferase5 OS=Zea mays OX=4577 GN=100216685 PE=4 SV=1 - [A0A1D6GRB4_MAIZE]	21.16	3	10	31	482	52.8211	6.45557	0.952179	1.00437	1.00904	0.988529	1.0197	0.958109	1.01491	0.997572	0.990936	0.753617
B6UF45	Caffeoyl-CoA O-methyltransferase 1	100286151	Caffeoyl-CoA O-methyltransferase 1 OS=Zea mays OX=4577 GN=100286151 PE=2 SV=1 - [B6UF45_MAIZE]	21.14	3	4	13	246	27.2698	5.021	0.887098	1.00788	0.978511	0.957829	1.06803	1.01217	0.939446	1.00655	0.951597	0.402185
B4FRZ2	Pyridoxal 5'-phosphate synthase-like subunit PDX1.2	ZEAMMB73_Zm00001d018633	Pyridoxal 5'-phosphate synthase-like subunit PDX1.2 OS=Zea mays OX=4577 GN=ZEAMMB73_Zm00001d018633 PE=2 SV=1 - [B4FRZ2_MAIZE]	21.14	7	7	20	317	33.6042	6.55127	0.998023	1.1175	0.989368	1.03496	1.06924	1.00992	1.10841	1.06252	0.974064	0.612847
B4FBC9	Patellin-1	100192106	Patellin-1 OS=Zea mays OX=4577 GN=100192106 PE=2 SV=1 - [B4FBC9_MAIZE]	21.13	9	12	49	620	67.9934	4.58936	0.986437	1.00382	0.973094	0.987784	1.03781	0.958407	1.09147	1.02923	0.959733	0.355027
A0A1D6EAC4	L-ascorbate peroxidase S chloroplastic/mitochondrial	100194161	L-ascorbate peroxidase S chloroplastic/mitochondrial OS=Zea mays OX=4577 GN=100194161 PE=3 SV=1 - [A0A1D6EAC4_MAIZE]	21.09	3	5	22	275	30.5224	6.06201	1.03509	0.946999	0.953736	0.978608	0.956657	1.01724	0.980285	0.984729	0.993784	0.863303
B6U3Y1	Versicolorin reductase		Versicolorin reductase OS=Zea mays OX=4577 PE=2 SV=1 - [B6U3Y1_MAIZE]	21.07	5	5	10	261	26.9259	5.65576	1.10473	1.05116	1.186	1.11396	0.924451	1.03278	0.970198	0.975811	1.14158	0.0513358
A0A1D6MUQ1	Beta-glucosidase 17	103650330	Beta-glucosidase 17 OS=Zea mays OX=4577 GN=103650330 PE=3 SV=1 - [A0A1D6MUQ1_MAIZE]	21.04	6	11	81	556	63.2609	6.53662	0.902349	1.12224	1.01694	1.01384	1.02817	0.944033	1.01351	0.995237	1.0187	0.79961
A0A1D6ESW5	Pyruvate dehydrogenase E1 component subunit beta	542483	Pyruvate dehydrogenase E1 component subunit beta OS=Zea mays OX=4577 GN=542483 PE=4 SV=1 - [A0A1D6ESW5_MAIZE]	21.04	2	6	39	347	37.454	5.22412	1.04744	1.0422		1.04482	0.98309	1.02477		1.00393	1.04073	0.190919
A0A1D6DWL5	3-oxoacyl-[acyl-carrier-protein] synthase III chloroplastic	100280714	3-oxoacyl-[acyl-carrier-protein] synthase III chloroplastic OS=Zea mays OX=4577 GN=100280714 PE=3 SV=1 - [A0A1D6DWL5_MAIZE]	21.02	6	6	11	333	34.6136	5.17334	1.0266	0.976748	0.936691	0.980013	1.0079	1.0087	1.04854	1.02172	0.959184	0.227253
A0A096PS68	54S ribosomal protein L51, mitochondrial	100282391	54S ribosomal protein L51, mitochondrial OS=Zea mays OX=4577 GN=100282391 PE=4 SV=1 - [A0A096PS68_MAIZE]	21.01	2	2	2	119	13.7524	10.5503	0.913072	0.77749		0.845281	1.07099	1.08164		1.07632	0.785346	0.0767837
K7U9P8	Methylthioribose-1-phosphate isomerase	ZEAMMB73_Zm00001d049042	Methylthioribose-1-phosphate isomerase OS=Zea mays OX=4577 GN=ZEAMMB73_Zm00001d049042 PE=3 SV=1 - [K7U9P8_MAIZE]	20.98	7	7	17	367	38.5982	6.04932	1.01388	1.18917	1.0086	1.07055	0.996142	0.950941	0.96806	0.971714	1.10171	0.179216
Q5XML0	Proteasome subunit beta		Proteasome subunit beta OS=Zea mays OX=4577 PE=2 SV=1 - [Q5XML0_MAIZE]	20.95	2	4	18	210	23.0728	5.64307	1.05311	0.978921		1.01602	1.07447	1.18271		1.12859	0.900253	0.228336
B7ZZR2	Uncharacterized protein		Uncharacterized protein OS=Zea mays OX=4577 PE=2 SV=1 - [B7ZZR2_MAIZE]	20.94	9	11	31	659	72.3954	6.75635	0.959581	0.826068	1.06376	0.949802	1.02554	0.994056	1.08373	1.03444	0.918178	0.314411
A0A1D6E8G3	Actin-7	ZEAMMB73_Zm00001d003298	Actin-7 OS=Zea mays OX=4577 GN=ZEAMMB73_Zm00001d003298 PE=3 SV=1 - [A0A1D6E8G3_MAIZE]	20.91	1	4	29	263	29.1175	5.60498	1.33935	1.07746		1.20841	0.832393	0.935689		0.884041	1.36691	0.147705
A0A1D6F5U0	Alpha-mannosidase	542217	Alpha-mannosidase OS=Zea mays OX=4577 GN=542217 PE=3 SV=1 - [A0A1D6F5U0_MAIZE]	20.87	20	20	63	1016	113.707	6.29053	0.995513	0.98054	0.945718	0.973923	0.943836	1.02172	1.04074	1.0021	0.971886	0.442769
B4FFA7	Enoyl-[acyl-carrier-protein] reductase [NADH] chloroplastic	100193519	Enoyl-[acyl-carrier-protein] reductase [NADH] chloroplastic OS=Zea mays OX=4577 GN=100193519 PE=2 SV=1 - [B4FFA7_MAIZE]	20.87	4	7	28	369	38.9831	7.75244	1.04715	0.942312	0.967762	0.985743	0.964217	1.04973	0.993692	1.00255	0.98324	0.698265
B4FG60	Mitogen-activated protein kinase	103639280	Mitogen-activated protein kinase OS=Zea mays OX=4577 GN=103639280 PE=2 SV=1 - [B4FG60_MAIZE]	20.86	4	6	19	374	43.2657	5.84619	0.98112	0.890632	0.965281	0.945678	1.00905	0.979202	1.12462	1.03762	0.911388	0.154108
C0HJ97	Eukaryotic translation initiation factor 5A		Eukaryotic translation initiation factor 5A OS=Zea mays OX=4577 PE=2 SV=1 - [C0HJ97_MAIZE]	20.83	1	3	16	120	13.1367	7.09326	0.924741		1.09333	1.00903	1.01917		0.879809	0.949488	1.06272	0.640703
A0A1D6LKU0	Protein arginine N-methyltransferase PRMT10	100384449	Protein arginine N-methyltransferase PRMT10 OS=Zea mays OX=4577 GN=100384449 PE=3 SV=1 - [A0A1D6LKU0_MAIZE]	20.81	6	6	9	346	38.4201	5.88428	0.987579	1.02888	0.950813	0.98909	1.09883	0.934601	1.03151	1.02165	0.968132	0.570354
C0PL01	T-complex protein 1 subunit gamma	103654781	T-complex protein 1 subunit gamma OS=Zea mays OX=4577 GN=103654781 PE=2 SV=1 - [C0PL01_MAIZE]	20.79	2	12	34	558	60.6477	6.58057	0.809227	1.02246		0.915842	1.11253	0.997366		1.05495	0.868137	0.369745
A0A1D6JSN1	T-complex protein 1 subunit gamma	100285961	T-complex protein 1 subunit gamma OS=Zea mays OX=4577 GN=100285961 PE=3 SV=1 - [A0A1D6JSN1_MAIZE]	20.79	2	12	35	558	60.6949	6.68311	1.06888	0.986133	0.972996	1.00934	0.983479	1.03351	0.996997	1.00466	1.00465	0.895872
A0A1D6QCJ3	Splicing factor, arginine/serine-rich 7	100280612	Splicing factor, arginine/serine-rich 7 OS=Zea mays OX=4577 GN=100280612 PE=4 SV=1 - [A0A1D6QCJ3_MAIZE]	20.78	2	3	5	154	17.3216	10.521	1.19011	1.0668	1.03846	1.09846	0.957114	1.06143	0.986351	1.00163	1.09667	0.158678
A0A1D6FN98	Heat shock 70 kDa protein 14	ZEAMMB73_Zm00001d009948	Heat shock 70 kDa protein 14 OS=Zea mays OX=4577 GN=ZEAMMB73_Zm00001d009948 PE=3 SV=1 - [A0A1D6FN98_MAIZE]	20.77	3	18	70	833	92.2478	5.30029	0.917	0.995999	1.01869	0.97723	1.07092	0.936299	0.918811	0.975342	1.00194	0.975197
A0A1D6FHT8	ATP-citrate synthase beta chain protein 2	ZEAMMB73_Zm00001d009127	ATP-citrate synthase beta chain protein 2 OS=Zea mays OX=4577 GN=ZEAMMB73_Zm00001d009127 PE=4 SV=1 - [A0A1D6FHT8_MAIZE]	20.72	11	11	21	608	65.934	7.6499	0.857448	1.0845	1.02317	0.988375	1.05593	0.913791	0.990299	0.986672	1.00173	0.983893
B6TDT6	Methylthioribose kinase		Methylthioribose kinase OS=Zea mays OX=4577 PE=2 SV=1 - [B6TDT6_MAIZE]	20.71	8	8	37	425	48.0813	6.22705	0.993957	1.0207	0.912095	0.975585	0.991869	0.977993	1.09226	1.02071	0.955793	0.405862
A0A0B4J3A7	DEAD-box ATP-dependent RNA helicase 34	103627913	DEAD-box ATP-dependent RNA helicase 34 OS=Zea mays OX=4577 GN=103627913 PE=3 SV=1 - [A0A0B4J3A7_MAIZE]	20.64	7	8	33	407	45.9307	6.3667	0.958599	1.03167	1.01071	1.00033	1.01257	1.03022	1.00216	1.01498	0.985559	0.562103
C0P827	Uncharacterized protein		Uncharacterized protein OS=Zea mays OX=4577 PE=2 SV=1 - [C0P827_MAIZE]	20.64	4	4	5	218	23.8647	5.74463	1.03559	1.01359		1.02459	0.95822	1.02133		0.989775	1.03518	0.406869
B4FW57	Uncharacterized protein		Uncharacterized protein OS=Zea mays OX=4577 PE=2 SV=1 - [B4FW57_MAIZE]	20.63	13	13	20	698	78.7602	5.51611	0.967082	1.19845	0.983653	1.04973	1.00132	0.885221	1.03809	0.974878	1.07678	0.441036
A0A1D6JG13	Cysteine protease 1	100283284	Cysteine protease 1 OS=Zea mays OX=4577 GN=100283284 PE=3 SV=1 - [A0A1D6JG13_MAIZE]	20.63	2	8	26	441	48.1505	5.23682	1.19931	0.843301	0.992289	1.01163	0.902225	1.11882	1.04286	1.0213	0.990534	0.940237
K7V9N5	20 kDa chaperonin chloroplastic	100191248	20 kDa chaperonin chloroplastic OS=Zea mays OX=4577 GN=100191248 PE=3 SV=1 - [K7V9N5_MAIZE]	20.62	3	4	14	194	19.8818	9.43701	0.746927	0.875206	1.30388	0.975337	1.13939	1.13773	0.738051	1.00506	0.970431	0.896689
B6TRH2	Sad1/unc-84-like protein 2		Sad1/unc-84-like protein 2 OS=Zea mays OX=4577 PE=2 SV=1 - [B6TRH2_MAIZE]	20.5	7	7	18	439	47.5024	7.95752	0.995099	0.966091	0.931022	0.964071	0.981753	0.99363	0.992158	0.989181	0.974616	0.254679
A0A1D6F1X1	Phospho-2-dehydro-3-deoxyheptonate aldolase	100501272	Phospho-2-dehydro-3-deoxyheptonate aldolase OS=Zea mays OX=4577 GN=100501272 PE=3 SV=1 - [A0A1D6F1X1_MAIZE]	20.48	2	10	41	537	58.962	8.41162	0.897075	1.08027		0.988671	0.954596	0.915111		0.934853	1.05757	0.623714
A0A1D6H6F1	Citrate synthase	ZEAMMB73_Zm00001d016248	Citrate synthase OS=Zea mays OX=4577 GN=ZEAMMB73_Zm00001d016248 PE=3 SV=1 - [A0A1D6H6F1_MAIZE]	20.48	9	9	22	503	55.2177	9.0415	0.924871	0.971647	1.04254	0.979685	1.04052	1.08379	0.990299	1.0382	0.943635	0.250523
B4FSG4	Jasmonate-induced protein	100283929	Jasmonate-induced protein OS=Zea mays OX=4577 GN=100283929 PE=2 SV=1 - [B4FSG4_MAIZE]	20.47	5	5	10	215	24.106	8.25049	1.4795	0.827936	1.1696	1.15901	0.77028	1.0213	0.896906	0.896161	1.29331	0.262339
B6TUB8	Phospho-2-dehydro-3-deoxyheptonate aldolase	100284499	Phospho-2-dehydro-3-deoxyheptonate aldolase OS=Zea mays OX=4577 GN=100284499 PE=2 SV=1 - [B6TUB8_MAIZE]	20.45	2	10	41	538	58.967	8.23584	1.11484	0.996987	1.15323	1.08835	0.903629	1.01938	0.787167	0.903393	1.20474	0.0867722
B6SIK5	B-cell receptor-associated 31-like	100284581	B-cell receptor-associated 31-like OS=Zea mays OX=4577 GN=100284581 PE=2 SV=1 - [B6SIK5_MAIZE]	20.45	2	2	4	132	15.166	8.66064	1.28472	1.08519		1.18496	0.851247	0.99598		0.923614	1.28296	0.168053
A0A1D6DZK3	Uncharacterized protein	ZEAMMB73_Zm00001d002325	Uncharacterized protein OS=Zea mays OX=4577 GN=ZEAMMB73_Zm00001d002325 PE=4 SV=1 - [A0A1D6DZK3_MAIZE]	20.44	1	5	11	274	31.589	4.86865	1.01588	0.951458		0.983671	1.00503	1.18347		1.09425	0.898945	0.363948
A0A1D6H7I2	RNA-binding (RRM/RBD/RNP motifs) family protein	100303796	RNA-binding (RRM/RBD/RNP motifs) family protein OS=Zea mays OX=4577 GN=100303796 PE=4 SV=1 - [A0A1D6H7I2_MAIZE]	20.41	2	2	6	98	11.1417	5.2749	1.05652	0.94556	1.01111	1.00439	0.970082	1.02174	0.982225	0.991349	1.01316	0.733894
K7TJV6	2-oxoglutarate dehydrogenase E1 component	100383847	2-oxoglutarate dehydrogenase E1 component OS=Zea mays OX=4577 GN=100383847 PE=4 SV=1 - [K7TJV6_MAIZE]	20.39	3	15	39	1025	115.994	6.94678	1.16662	1.06778	1.04052	1.09164	0.783148	1.14831	0.976892	0.969451	1.12604	0.337434
B4FGH7	NADH dehydrogenase [ubiquinone] iron-sulfur protein 4 mitochondrial	100193844	NADH dehydrogenase [ubiquinone] iron-sulfur protein 4 mitochondrial OS=Zea mays OX=4577 GN=100193844 PE=2 SV=1 - [B4FGH7_MAIZE]	20.38	4	4	8	157	17.25	10.0376	1.15411	1.02864	1.35332	1.17869	0.953976	1.05737	0.719773	0.910373	1.29473	0.122776
B4FHK5	NPL4 family protein	100194136	NPL4 family protein OS=Zea mays OX=4577 GN=100194136 PE=2 SV=1 - [B4FHK5_MAIZE]	20.38	7	7	15	417	45.5606	5.46533	0.999457	0.973589	1.02932	1.00079	0.985614	0.957686	1.05657	0.999958	1.00083	0.981447
B6ST04	Beta-hexosaminidase		Beta-hexosaminidase OS=Zea mays OX=4577 PE=2 SV=1 - [B6ST04_MAIZE]	20.37	7	9	32	545	60.5286	6.18896	0.977656	0.896771	0.9249	0.933109	0.982888	1.04452	1.13284	1.05341	0.885796	0.0721528
C0P3B4	Pentatricopeptide repeat-containing protein	100381976	Pentatricopeptide repeat-containing protein OS=Zea mays OX=4577 GN=100381976 PE=2 SV=1 - [C0P3B4_MAIZE]	20.33	5	5	13	246	26.2191	6.16357	1.01744	1.06843	0.937098	1.00766	1.09082	0.950349	0.996266	1.01248	0.995239	0.935902
B4FTE1	Signal peptidase complex subunit 2		Signal peptidase complex subunit 2 OS=Zea mays OX=4577 PE=2 SV=1 - [B4FTE1_MAIZE]	20.31	4	4	7	192	21.1653	9.15869	1.0018	0.856075	1.02713	0.961667	0.963684	1.10515	0.907748	0.992194	0.969233	0.719925
B6TIL4	GDP-mannose 3,5-epimerase 2		GDP-mannose 3,5-epimerase 2 OS=Zea mays OX=4577 PE=2 SV=1 - [B6TIL4_MAIZE]	20.22	3	7	28	371	41.9658	6.46826	0.819811	1.04509	1.01356	0.959488	1.09839	1.00381	0.948947	1.01705	0.943404	0.525482
K7VXF0	Triacylglycerol lipase-like 1	100277743	Triacylglycerol lipase-like 1 OS=Zea mays OX=4577 GN=100277743 PE=4 SV=1 - [K7VXF0_MAIZE]	20.22	12	12	78	534	58.1932	8.57275	1.04148	0.96158	0.988948	0.997336	1.01471	1.03204	1.01517	1.02064	0.977168	0.388801
B6T3J9	PRA1 family protein	100282099	PRA1 family protein OS=Zea mays OX=4577 GN=100282099 PE=2 SV=1 - [B6T3J9_MAIZE]	20.21	3	3	7	193	20.6733	7.60596	1.09125	0.883833	0.833213	0.936098	0.96783	1.03762	1.16047	1.05531	0.88704	0.286297
B4FP94	Uncharacterized protein		Uncharacterized protein OS=Zea mays OX=4577 PE=2 SV=1 - [B4FP94_MAIZE]	20.19	1	9	41	431	47.4175	9.08545		1.04834	1.06983	1.05909		1.00032	0.889073	0.944698	1.12109	0.180926
A0A1D6HP40	Glutathione reductase cytosolic	100273659	Glutathione reductase cytosolic OS=Zea mays OX=4577 GN=100273659 PE=3 SV=1 - [A0A1D6HP40_MAIZE]	20.13	8	8	35	462	49.7067	6.87354	0.956338	0.942172	1.05191	0.983474	1.03915	1.00403	0.990827	1.01133	0.972453	0.497261
A0A1D6GPV8	RNA-binding (RRM/RBD/RNP motifs) family protein	100192006	RNA-binding (RRM/RBD/RNP motifs) family protein OS=Zea mays OX=4577 GN=100192006 PE=4 SV=1 - [A0A1D6GPV8_MAIZE]	20.13	2	2	4	154	17.0077	4.99561	1.19734	1.11075		1.15404	0.861578	0.995987		0.928783	1.24253	0.106246
C0PD50	Uncharacterized protein		Uncharacterized protein OS=Zea mays OX=4577 PE=2 SV=1 - [C0PD50_MAIZE]	20.1	6	6	9	393	43.992	7.79639	1.06556	0.941971	1.08008	1.0292	0.980387	1.0217	0.980383	0.994158	1.03525	0.487995
A0A1D6I1V3	Phosphoenolpyruvate carboxylase3	ZEAMMB73_Zm00001d020057	Phosphoenolpyruvate carboxylase3 OS=Zea mays OX=4577 GN=ZEAMMB73_Zm00001d020057 PE=3 SV=1 - [A0A1D6I1V3_MAIZE]	20.06	12	17	63	967	109.966	6.03662	1.03968	0.952813	0.983524	0.992004	0.94901	0.922136	1.07527	0.982138	1.01005	0.862961
C0P503	Uncharacterized protein		Uncharacterized protein OS=Zea mays OX=4577 PE=2 SV=1 - [C0P503_MAIZE]	20	6	6	10	315	33.9539	5.30029	1.1148	0.936734	1.0343	1.02861	0.951073	1.11954	0.975656	1.01542	1.01299	0.866436
B4FK56	Peroxidase	100216875	Peroxidase OS=Zea mays OX=4577 GN=100216875 PE=2 SV=1 - [B4FK56_MAIZE]	19.94	5	5	10	341	35.9752	8.32373	1.10528	1.03589	0.916909	1.01936	1.02054	1.05518	1.09886	1.05819	0.963302	0.549493
B4G066	Methylmalonate-semialdehyde dehydrogenase [acylating] mitochondrial	100274311	Methylmalonate-semialdehyde dehydrogenase [acylating] mitochondrial OS=Zea mays OX=4577 GN=100274311 PE=2 SV=1 - [B4G066_MAIZE]	19.93	8	8	28	537	57.4812	6.78564	1.14598	1.0632	0.974315	1.06117	0.946176	0.957893	1.05241	0.985492	1.07679	0.275063
A0A1D6F9P5	Syntaxin 132	100283000	Syntaxin 132 OS=Zea mays OX=4577 GN=100283000 PE=4 SV=1 - [A0A1D6F9P5_MAIZE]	19.92	5	5	20	251	28.6236	5.52881	0.943687	0.935158	0.833909	0.904251	1.02992	0.959151	1.07558	1.02155	0.885174	0.0744173
B4FPY4	Uncharacterized protein		Uncharacterized protein OS=Zea mays OX=4577 PE=2 SV=1 - [B4FPY4_MAIZE]	19.85	2	2	6	136	14.5537	7.97217		1.06746	1.23619	1.15183		0.997318	0.866531	0.931925	1.23597	0.175557
B4FPR9	Purple acid phosphatase	Zm00014a_009198	Purple acid phosphatase OS=Zea mays OX=4577 GN=Zm00014a_009198 PE=2 SV=1 - [B4FPR9_MAIZE]	19.83	8	8	42	348	38.7181	5.98584	1.00273	0.900409	0.907831	0.936992	0.946331	0.997272	1.01717	0.986926	0.949404	0.270838
B4FBP0	T-complex protein 1 subunit eta	100272855	T-complex protein 1 subunit eta OS=Zea mays OX=4577 GN=100272855 PE=2 SV=1 - [B4FBP0_MAIZE]	19.82	11	11	47	560	60.2622	7.38623	0.898	1.04487	0.993653	0.97884	1.08558	0.977099	0.974816	1.0125	0.966757	0.583186
B6SHX8	Uncharacterized protein		Uncharacterized protein OS=Zea mays OX=4577 PE=2 SV=1 - [B6SHX8_MAIZE]	19.82	2	2	3	111	11.3807	4.79248	1.09546	1.07368		1.08457	1.0415	0.949161		0.995331	1.08966	0.200675
Q8W0V2	Lipoxygenase	542495	Lipoxygenase OS=Zea mays OX=4577 GN=542495 PE=3 SV=1 - [Q8W0V2_MAIZE]	19.79	12	17	61	864	96.4302	6.0874	1.1136	0.916633	0.975873	1.00204	0.943912	1.00023	1.00522	0.983121	1.01924	0.774017
K7VP18	Putative leucine-rich repeat receptor-like protein kinase family protein	103639428	Putative leucine-rich repeat receptor-like protein kinase family protein OS=Zea mays OX=4577 GN=103639428 PE=4 SV=1 - [K7VP18_MAIZE]	19.79	2	11	25	672	70.5034	7.04932	1.16472	1.24614	0.973623	1.12816	0.949677	0.916546	1.05674	0.974321	1.15789	0.166812
A0A1D6FWQ1	Peroxisomal membrane protein PEX14	100283640	Peroxisomal membrane protein PEX14 OS=Zea mays OX=4577 GN=100283640 PE=4 SV=1 - [A0A1D6FWQ1_MAIZE]	19.79	1	2	4	96	10.2924	8.54346	1.12259	0.677054		0.899822	0.895363	1.30821		1.10179	0.816692	0.574468
A0A317Y225	D-3-phosphoglycerate dehydrogenase	PGDH2	D-3-phosphoglycerate dehydrogenase OS=Zea mays OX=4577 GN=PGDH2 PE=3 SV=1 - [A0A317Y225_MAIZE]	19.71	9	10	44	624	65.2298	7.02002	1.00579	0.888103	0.975885	0.956592	1.01469	1.09006	0.994372	1.03304	0.925997	0.170147
A0A1D6L6U6	Glutathione transferase5	542734	Glutathione transferase5 OS=Zea mays OX=4577 GN=542734 PE=4 SV=1 - [A0A1D6L6U6_MAIZE]	19.64	6	6	23	224	25.242	6.58057	0.864874	0.787292	0.944412	0.865526	1.0339	1.0033	0.966026	1.00108	0.864595	0.0517597
B4FBD5	Uncharacterized protein		Uncharacterized protein OS=Zea mays OX=4577 PE=2 SV=1 - [B4FBD5_MAIZE]	19.59	6	6	9	388	40.4994	6.32861	1.07052	0.887722	1.07938	1.01254	0.958926	1.07195	0.986191	1.00569	1.00681	0.927889
A0A1D6N7A4	Acyl-coenzyme A oxidase	ZEAMMB73_Zm00001d042884	Acyl-coenzyme A oxidase OS=Zea mays OX=4577 GN=ZEAMMB73_Zm00001d042884 PE=3 SV=1 - [A0A1D6N7A4_MAIZE]	19.59	10	10	40	684	76.1462	7.56201	0.988805	0.936624	0.968447	0.964626	0.970357	0.961343	1.00721	0.979637	0.984677	0.507991
B4FAV4	Argininosuccinate lyase chloroplastic	100191977	Argininosuccinate lyase chloroplastic OS=Zea mays OX=4577 GN=100191977 PE=2 SV=1 - [B4FAV4_MAIZE]	19.57	9	9	21	516	57.5066	6.1001	0.965779	0.928148	1.01862	0.970848	0.964876	0.985222	0.985301	0.978466	0.992214	0.792603
B4G0U5	Pectin lyase-like superfamily protein	100284797	Pectin lyase-like superfamily protein OS=Zea mays OX=4577 GN=100284797 PE=2 SV=1 - [B4G0U5_MAIZE]	19.55	7	7	11	486	51.7117	6.78564	0.905143	1.02544	1.16865	1.03308	1.00608	0.93847	1.01272	0.985757	1.04801	0.584953
[truncated: 1,696 more rows]

## Sheet: Table 2
Table 2. The list of protein identification
[truncated: 4,531 more rows]

## Sheet: Table 3
Table 3. The list of peptides identification
[truncated: 14,614 more rows]

## Sheet: Table 4
	Table 4. raw data of roots and leaf weights					Table 6. raw data of glucose content			Table 6. raw data of fructose content			Table 7. raw data of sucrose content
[truncated: 23 more rows]
